# Supplementary material
Source: PubMed Central journal article supplement (PMC4136618)
Supplement: 1412327111_pnas.1412327111.sapp.pdf [file 1412327111_pnas.1412327111.sapp.pdf]

## Methods

**Mice:** 4-6 weeks old female C57BL/6 mice obtained from Jackson labs were used for cell isolation. Female Foxp3-IRES-GFP reporter mice (1), backcrossed to B6/C57 background for 10 generations, were used for the isolation of naïve CD4 and naïve CD8 cells for the RNAseq experiments. The mice were housed in pathogen-free animal facility in the La Jolla Institute for Allergy and Immunology and were used according to protocols approved by the Institutional Animal Care and use Committee.

**Preparation of cells:** Subsets of thymocytes were isolated by cell sorting as previously described (2), after cell surface staining using CD4 (GK1.5), CD8 (53-6.7), CD3 $\epsilon$  (145-2C11), CD24 (M1/69) (all from Biolegend). DP cells: CD4<sup>+</sup>CD8<sup>int/hi</sup>; CD4 SP cells: CD4CD3<sup>hi</sup>, CD24<sup>int/lo</sup>; CD8 SP cells: CD8<sup>int/hi</sup> CD4 CD3<sup>hi</sup>, CD24<sup>int/lo</sup> (**Fig S2**). Peripheral subsets were isolated after pooling spleen and lymph nodes. T cells were enriched by negative isolation using Dynabeads (Dynabeads untouched mouse T cells, 11413D, Invitrogen). After surface staining for CD4 (GK1.5), CD8 (53-6.7), CD62L (MEL-14), CD25 (PC61) and CD44 (IM7), naïve CD4<sup>+</sup>CD62L<sup>hi</sup>CD25<sup>-</sup>CD44<sup>lo</sup> and naïve CD8<sup>+</sup>CD62L<sup>hi</sup>CD25<sup>-</sup>CD44<sup>lo</sup> were obtained by sorting (BD FACS Aria). Additionally, for the RNAseq experiments, CD4 and CD8 naïve cells were isolated by sorting T cells from the Foxp3-IRES-GFP mice: CD4<sup>+</sup>CD62L<sup>hi</sup>CD25<sup>-</sup>CD44<sup>lo</sup> GFP(FOXP3)<sup>-</sup> and CD8<sup>+</sup>CD62L<sup>hi</sup>CD25<sup>-</sup>CD44<sup>lo</sup> GFP(FOXP3)<sup>-</sup> (antibodies were from Biolegend). In some cases, naïve CD4 cells were cultured in vitro under Th1 or Th2 polarizing conditions (3, 4). Briefly, for Th1 polarization naïve CD4 T cells were cultured in the presence of 10 ng/ml IL12, 10  $\mu$ g/ml anti-IL-4, 1  $\mu$ g/ml anti CD3 (clone 2C11) and 1  $\mu$ g/ml anti-CD28 (clone 37.51) for 2 days. In the case of Th2 polarization naïve CD4 T cells were cultured in the presence of 1000 U/ml IL-4, 5  $\mu$ g/ml anti-IFN- $\gamma$ , 3  $\mu$ g/ml anti-IL-12, 1  $\mu$ g/ml anti CD3 (clone 2C11) and 1  $\mu$ g/ml anti-CD28 (clone 37.51) for 2 days. On day 3 of culture, cells were removed from TCR/ costimulation conditions and expanded in the presence of 20 U/mL IL-2 for Th1 and 10 U/mL IL-2 for Th2 polarization conditions for 4 days. Data analysis was performed using FlowJo (Tree Star Inc).

**Intracellular staining for IFN- $\gamma$  and IL-4:** On day 6 of in vitro culture, cells were restimulated for 5 hours in the presence of 500 nM PMA (Calbiochem) and 1  $\mu$ M ionomycin (Calbiochem). During the last 3 hours of culture, 10  $\mu$ g/ml of Brefeldin A (Sigma) was added. Intracellular staining was performed for IFN- $\gamma$  and IL-4 using the Cytofix/Cytoperm kit (BD Biosciences). Data analysis was performed using FlowJo (Tree Star Inc).

### **Enrichment-based detection of 5-hydroxymethylcytosine (5hmC):**

*Biotin-glucosyl tagging and enrichment of 5hmC (Biotin-gmC, a variant of GLIB (5)):* For specific biotinylation of 5hmC in DP T cells, we used the Hydroxymethyl Collector kit (Active Motif, Carlsbad, CA) to selectively label 5hmC bases with glucose and biotin moieties to form biotin-N3-5-gmC as previously described(6). To ensure efficient biotinylation, 2  $\mu$ g of genomic DNA were biotinylated per reaction. In this case we used the 5500 SOLiD fragment library preparation kit from Applied Biosystems in order to prepare the library and the 5500 SOLiD Library indexed adaptors 1-16 according to the

manufacturer's instructions. The samples were sequenced using the SOLiD 5500 platform.

**Chromatin Immunoprecipitation and library preparation:** 10 million sorted DP T cells were fixed for 10 min in 1% PFA (Pierce), quenched with glycine and washed twice with PBS containing protease inhibitors (Roche) and sodium butyrate (to inhibit deacetylation) (Sigma). These inhibitors were present in all the following steps. Cells were lysed on ice in Lysis buffer (50 mM Hepes pH 7.9, 1 mM EDTA pH 8.0, 0.5 mM EGTA pH 8.0, 140 mM NaCl, 10% Glycerol, 0.5% NP-40, 0.25 % Triton, protease inhibitors and 5 mM sodium butyrate) in order to obtain nuclei, that were washed twice with washing buffer (10 mM Tris-Cl pH 8.0, 200 mM NaCl, 1 mM EDTA pH 8.0, 0.5 mM EGTA pH 8.0, 1x protease inhibitors, 5 mM sodium butyrate) and resuspended in shearing buffer (0.1% SDS, 1 mM EDTA pH 8.0, 1x protease inhibitors, 5 mM sodium butyrate). Then, chromatin was sheared to an average size of 200 bp. Half of the material was used (equivalent to 5 million cells) per immunoprecipitation reaction. 10% was saved as input. Briefly, 2 µg of anti-histone H3acetylK27 (Abcam, ab 4729) was coupled to 30 µl Dynabeads protein G for immunoprecipitation (Invitrogen). The immunoprecipitation reaction was performed overnight (approximately 16 h) in RIPA buffer (50 mM Tris pH 8.0, 150 mM NaCl, 1 mM EDTA, 1 % NP-40, 0.1% SDS, 0.5% Deoxycholate). The next day, 2 washes were performed with RIPA buffer, 1 wash with High Salt Buffer (50 mM Tris pH 8.0, 500 mM NaCl, 1mM EDTA, 1 % NP-40, 0.1% SDS, 0.5% Deoxycholate) and one wash with TE. After the last wash with TE, DNA was eluted by resuspending the beads in elution buffer (100 mM NaHCO<sub>3</sub> and 1% SDS) with rotation for 40 min at room temperature. The eluted DNA from the IP reaction as well as the input DNA were treated with 5 µg of RNase A for 30 min to ensure removal of RNA. Then de-crosslinking reaction was performed overnight in the presence of proteinase K (Ambion) at 65 °C with shaking. De-crosslinked DNA was used to construct the library as described in the CMS-IP section, using the Illumina Truseq adaptors for the input and the IP sample.

**RNA isolation and whole transcriptome library preparation for RNAseq:** For naïve CD4 and CD8 samples, RNA was isolated using Trizol (Invitrogen). Subsequently ribosomal RNA was depleted by RiboZero (Epicentre) and for the following steps the guidelines for whole transcriptome library preparation from low input provided by SOLiD (Applied Biosystems by Life Technologies) were followed. Briefly, using the total RNA-seq kit by SOLiD, enzymatic fragmentation of RNA was performed, then purification (PureLink RNA Micro Kit, Invitrogen), hybridization and ligation, reverse transcription, purification and size selection of the produced cDNA and amplification of the size selected DNA were performed using Phusion. The libraries were sequenced using the SOLiD 5500 platform.

**Quantitative analysis of 5hmC levels using dot blots:** 50 ng genomic DNA samples were sheared using needle and treated with sodium bisulfite using the Methylcode kit (Invitrogen), following the guidelines described in the CMS-IP section. DNA was prepared using 2-fold serial dilutions in TE buffer and then denatured in 0.4 M NaOH/ 10 mM EDTA at 95°C for 10 min and followed by adding an equal volume of cold 2M ammonium acetate (pH 7.0) on ice for 10 min. Denatured DNA samples were spotted on a nitrocellulose membrane in an assembled Bio-Dot apparatus (Bio-Rad) according to

the manufacturer's instructions. The membrane was washed with 2XSSC buffer and then vacuum-baked at 80° C for 2 hrs. Then the membrane was blocked with 5% non-fat milk for 1 hr and incubated with rabbit antisera against CMS detected by HRP-conjugated secondary antibody and enhanced chemiluminescence.

## DATA ANALYSIS

**Biotin-gmC (GLIB) data analysis:** The GLIB and input reads were mapped against mm9 in color-space using Bowtie (7). Enriched regions (ERGs) relative to input DNA were detected using the “findPeaks” routine in HOMER (8) with the “histone” mode and default parameter values.

Intragenic levels of GLIB and input DNA were quantified by counting the number of reads falling into RefSeq genes defined by the corresponding annotated transcription start and termination sites. The RPKM values were calculated based on the read counts in the GLIB samples. The log fold enrichment of IP DNA was calculated against input DNA.

**CMS-IP data analysis:** The CMS-IP and input reads were mapped against mm9 and lambda phage DNA using the Bismark mapping tool (9). The mapping was done using the Bowtie 2 (10) backend in the paired-end mode with the following parameter values: -l 0 -X 600 -N 0. Before pooling biological replicates their similarity was assessed using the method described below. Enriched regions (ERGs) relative to input DNA were detected using the “findPeaks” routine in HOMER (8) with the “histone” mode and default parameter values.

Intragenic levels of CMS-IP and input DNA were quantified by counting the number of reads falling into RefSeq genes defined by the corresponding annotated transcription start and termination sites. The RPKM values were calculated based on the read counts in the CMS-IP samples. The log fold enrichment of IP DNA was calculated against input DNA.

While calculating the average signal depicted in **Fig. 1c-d** the genes were extended 10% of the gene length downstream and upstream from transcription start site and transcription termination site, respectively. These extended gene regions were divided into 60 distinct intervals and the 5hmC and input DNA content of the bins was quantified (RPKM). For each of the bins the enrichment of 5hmC relative to input DNA was quantified followed by a step where the average enrichment was calculated over the considered genes.

**RNA-seq data analysis:** The sequencing reads given either in base-space or color-space were mapped to the mm9 genome and exon-exon junctions using Tophat (11). The exon-exon junctions were derived from the RefSeq gene annotations downloaded on June 16, 2012 (12). In case of biological replicates they were pooled for subsequent analysis. The number of reads falling into each RefSeq gene was quantified using the HTSeq-count script (13). The CD4 and CD8 naïve RNA-seq libraries were constructed from total RNA, and thus the small nucleolar RNA transcripts were discarded from the

analysis. The RPKM values were calculated based on the read counts using a custom script.

**ChIP-seq data analysis:** The ChIP-seq sequencing libraries were mapped against mm9 using Bowtie (7). Reads with identical sequences were filtered and only one was retained for subsequent analysis. Fragment size estimation was done using HOMER (8). In case of biological replicates they were pooled for subsequent analysis.

Intragenic levels of H3K4me3, H3K27me3, H3K36me3 and PolII were quantified by counting the number of reads falling into RefSeq genes defined by the corresponding annotated transcription start and termination sites. The RPKM values were calculated based on the read counts. The above procedure was done separately for IP and input DNA samples. The fold enrichment of IP DNA was calculated against input DNA.

**Biological and experimental variation between hydroxymethylomes:** The mm9 genome was divided into distinct 1,000 bp windows and the amount of the GLIB and CMS-IP signal within each of the intervals is quantified using the RPKM measure. The concordance in the window-base resolution between the hydroxymethylomes measured using the two alternative experimental approaches or between different biological samples was visualized using density plot representations. The degree of concordance was quantified by calculating Pearson's correlation coefficient  $r$ .

**Bisulfite conversion efficiency:** The samples were spiked with unmethylated lambda phage DNA to enable an accurate estimation of bisulfite conversion efficiency. The CMS-IP sequencing libraries were mapped against the sequence of lambda phage DNA using the Bismark mapping tool (9). The Bismark output was used to assess the bisulfite conversion efficiency of cytosines in CpG, CHG and CHH context within lambda phage DNA.

**Saturation analysis:** Saturation of the CMS-IP paired-end sequencing runs (**SI Appendix, Supplementary Methods Fig. 1**) was determined using the "saturation" routine in the MEDIPS package (version 1.10.0) (14) with the following parameter values: `uniq=TRUE`, `window_size=100`, `rank=FALSE`, `empty_bins=TRUE`, `paired=TRUE`.

**Clustering analysis:** Intragenic 5hmC (CMS-IP) levels across the cell types were quantified as described above. Genes shorter than 1,000 bp were discarded from the clustering analysis for focusing on the genes with more reliable intragenic 5hmC levels. In addition, it was required that the genes had considerable levels of intragenic 5hmC ( $\log_2$  fold-change > 1).

In generating **Fig. 5a**, the hierarchical clustering was applied to  $\log_2$  fold-change signals using the Euclidean distance and the complete linkage method. The cut threshold was defined to be 70% of the maximum linkage. To stabilize the clustering result, the large 5hmC enrichments ( $\log_2$  fold-change > 3) and depletions ( $\log_2$  fold-change < 0) were truncated to 3 and 0, respectively.

**Dynamics of 5hmC and gene expression:** Intragenic 5hmC (CMS-IP) levels across the cell types were quantified as described above. Genes shorter than 1,000 bp were discarded from the analysis for focusing on the genes with more reliable intragenic 5hmC levels. In addition, in **Fig. 5c** it was required that the genes had considerable

levels of intragenic 5hmC ( $\log_2$  fold-change  $> 2$ ) at least in one of the two cell types under investigation. Additionally, in **Fig. 5c**, we required that the logarithmic fold change of 5hmC (5hmC  $\log_2$  fold change) is greater than 0.5 and the logarithmic fold change in gene expression (RPKM  $\log_2$  fold-change) greater than 2. The degree of correlation between the changes in gene expression and intragenic 5hmC was quantified by calculating Spearman's rank correlation coefficient.

**Public datasets:** *SI Appendix, Table S3* lists the accession codes of the utilized data sets and corresponding PubMed identifiers of the publications in which data were published. The raw data sets were downloaded from the NCBI repository GEO database. The RNA-seq and ChIP-seq data sets were preprocessed and analyzed as described above. Briefly, we mined publicly available datasets for gene expression data on the remaining five subsets (DP, CD4 and CD8 SP, Th1 and Th2 cells) as well as data on the genome-wide distribution of histone marks and RNA polymerase II (Suppl Table 3) (2, 15-18).

**Gene enrichment analysis:** Enrichment of GO (Gene Ontology) categories (*SI Appendix, Table S8*) among the gene clusters in **Figure 5a** was assessed using the GeneTrail web tool (19) with the default parameters. The background set consisted all the RefSeq genes without snoRNAs ( $N = 23,167$ ).

Those GO categories having one or more of the following strings "T cell", "lymphocyte", "immune", "leukocyte", "hemopoiesis", "interleukin", "thymic", "thymus", "thymocyte", "interferon gamma", "antigen" or "MHC" in their name were defined to be immune-related (*SI Appendix, Fig. S5; Table S8*).



## Supplementary Figure Legends

**Figure S1. Summary of the stages of T cell commitment in the thymus and Th1 and Th2 differentiation in the periphery, highlighting the key transcription factors that regulate these processes.** In the thymus, positively selected DP (double-positive, CD4<sup>+</sup>CD8<sup>+</sup>) T cells give rise to CD4 and CD8 SP thymocytes; in the periphery, CD4<sup>+</sup> naïve T cells differentiate towards diverse helper T cell lineages with distinct functions, including the Th1 and Th2 T helper subsets investigated in this study. Key factors involved in transcriptional regulatory networks that shape T cell identity are shown: *red*, factors expressed at each stage; *black*, factors that are not expressed or expressed at low levels. The major lineage-specifying factor for each subset is highlighted in yellow: ThPOK for CD4 SP cells, RUNX3 for CD8 SP cells and Th1 cells, and GATA3 for Th2 cells. The cross talk between transcription factors, which skews the balance of differentiation in favor of one lineage (*red arrows*) while repressing differentiation towards the opposing lineage (*blue terminated lines*), is indicated.

**Figure S2. Strategies for cell isolation by fluorescence-activated cell sorting (FACS) and in vitro polarization towards T helper lineages.** **a**, Thymocytes were isolated from C57BL/6 mice and surface stained for CD4, CD8, CD24 and CD3. Total DP T cells are gated as shown. Mature CD4 and CD8 SP T cells were isolated based on CD24 and CD3 expression: CD4 SP cells were identified as CD8<sup>-</sup>CD4<sup>+</sup> CD24<sup>low</sup>CD3<sup>+</sup> cells and CD8 SP T cells as CD8<sup>+</sup>CD4<sup>-</sup>CD24<sup>low</sup>CD3<sup>+</sup> cells. **b**, Enriched peripheral T cells were stained for surface markers CD4, CD8a, CD25, CD62L and CD44 (see *Methods*). Naïve CD4<sup>+</sup> T cells were obtained by gating on CD4<sup>+</sup> T cells and selecting for CD25<sup>-</sup>CD62L<sup>+</sup>CD44<sup>low</sup> cells; for naïve CD8<sup>+</sup> T cells we obtained CD62L<sup>+</sup>CD44<sup>low</sup> cells. **c**, Truly naïve CD4 cells were polarized towards the Th1 and Th2 lineages in vitro in the presence of appropriate cytokines and TCR co-stimulation, then expanded in vitro until day 6. To assess the effectiveness of differentiation, cells were re-stimulated with PMA/ionomycin and evaluated for production of the signature cytokines for each lineage by intracellular staining and subsequent flow cytometric analysis (see *Methods*).

**Figure S3. Concordance between GLIB and CMS-IP and biological reproducibility of CMS-IP.** **a**, Examples of the similar results obtained with the GLIB and CMS-IP techniques, shown by comparison of genome browser tracks for selected genes (*Bcl11b*, *Cd4*, *Cd8a*) in DP T cells. **b**, Concordance of the GLIB and CMS-IP techniques. To compare the GLIB and CMS-IP datasets obtained for DP T cells, we divided the mm9 genome into distinct 1,000 bp intervals and quantified the amount of the GLIB and CMS-IP signal within each of the intervals using the RPKM measure. The concordance between the values obtained using the two different approaches is visualized using a density plot representation. The methods show overlap as revealed by the significant positive Pearson's correlation coefficient (exact permutation test for testing the null hypothesis that there is no correlation, two tailed, \* $p < 2.2 \times 10^{-16}$ ). **c**, Comparison of the GLIB and CMS-IP datasets obtained for DP T cells, in this case focusing on intragenic regions (see *Methods*). The Spearman's rank correlation coefficient is depicted (exact permutation test for testing the null hypothesis that there is no correlation, two tailed, \* $p < 2.2 \times 10^{-16}$ ). **d**, Similarity of the 5hmC landscapes obtained using different biological samples, studied as in **b**. Notice the improved concordance with increased 5hmC levels in **b-d**.

**Figure S4. Quantification of 5hmC upon in vitro polarization of naïve CD4 T cells towards the Th1 and Th2 lineages.** 5hmC levels in naïve CD4 T cells and in *in vitro*

differentiated Th1 and Th2 T cells at different time points were quantified by DNA dot-blot using anti-CMS antiserum and a DNA standard (see *Methods*). 2-fold dilutions of genomic DNA are shown. Note the abrupt drop of 5hmC in Th1 and Th2 cells differentiated for 5 days.

**Figure S5. Dynamic intragenic 5hmC distribution during T cell lineage commitment and specification is observed in genes with immunological function.** Heat map representation of the enrichment or depletion of clusters 1, 2, 4 and 6 shown in figure 5a for immune-related GO categories (see *Methods*). In total 141 enriched GO categories were evaluated. A selection of representative categories is depicted in the left side of the figure.

**Figure S6. Genome browser views of 5hmC distribution in the studied T cells at genes encoding transcription factors that specify alternative cell lineages.** Bar graphs (*top*) depict RPKM values summed over the gene body (TSS to TTS) (*y-axis*) for gene expression and 5hmC in each of the 7 cell subtypes. The figure emphasizes the lack of 5hmC (*black*) at the *Cebpa*, *Gata1*, *Pax5*, which encode factors with lineage-specifying roles during myeloid (*Cebpa*), erythrocyte (*Gata1*), B cell (*Pax5*) differentiation. All these genes were expressed at very low levels in all the T cell subsets as evaluated by RNA-seq, consistent with the absence of 5hmC.

#### SUPPLEMENTARY TABLES

**Table S1:** Mapping statistics of the generated CMS-IP and GLIB samples. The number of properly paired reads per sample is given.

**Table S2:** Bisulfite conversion efficiency of cytosines in CpG, CHG and CHH context, estimated using spiked-in unmethylated lambda phage DNA.

**Table S3:** The GEO accession codes of the previously published data sets utilized in this study, along with PubMed identifiers of the corresponding publications.

**Table S4:** Numbers of genes categorized based on their expression levels in different T cell subsets.

**Table S5:** Number of HERGs in different intragenic and intergenic regions for each T cell subset.

**Table S6:** List of genes belonging to the clusters depicted in **Fig. 5a**, and their intragenic 5hmC levels in DP, CD4 SP, CD8 SP, naïve CD4 and naïve CD8T cell subsets.

**Table S7:** List of genes shown in **Fig. 5c** that show same or opposite direction in the gain of 5hmC and gene expression.

**Table S8:** Listing of GO categories used and enumeration of genes/ cluster that show enrichment/ depletion for each category, depicted in **SI Appendix, Figure S5**.

#### SUPPLEMENTARY METHODS FIGURE LEGENDS

**Supplementary Methods Fig. 1. Saturation analysis of the CMS-IP data for different T cell subsets.** Depth of coverage was evaluated for the biological replicates of the different T cell subsets. Saturation level of each CMS-IP sample is estimated using the saturation routine in the MEDIPS package (see *Methods*). Saturation analysis of the mapped anti-CMS IP sequencing data shows sufficient saturation for all the subsets and



the biological replicates examined. In all cases, a minimum of 0.98 saturation correlation was observed, whereas the estimated correlation was at least 0.99.

## References

1. Haribhai D, *et al.* (2007) Regulatory T cells dynamically control the primary immune response to foreign antigen. *Journal of immunology* 178(5):2961-2972.
2. Kirigin FF, *et al.* (2012) Dynamic microRNA gene transcription and processing during T cell development. *Journal of immunology* 188(7):3257-3267.
3. Djuretic IM, *et al.* (2007) Transcription factors T-bet and Runx3 cooperate to activate Ifng and silence Il4 in T helper type 1 cells. *Nature immunology* 8(2):145-153.
4. Bandukwala HS, *et al.* (2012) Selective inhibition of CD4+ T-cell cytokine production and autoimmunity by BET protein and c-Myc inhibitors. *Proceedings of the National Academy of Sciences of the United States of America* 109(36):14532-14537.
5. Lister R, *et al.* (2013) Global epigenomic reconfiguration during mammalian brain development. *Science* 341(6146):1237905.
6. Song CX, *et al.* (2011) Selective chemical labeling reveals the genome-wide distribution of 5-hydroxymethylcytosine. *Nature biotechnology* 29(1):68-72.
7. Langmead B, Trapnell C, Pop M, & Salzberg SL (2009) Ultrafast and memory-efficient alignment of short DNA sequences to the human genome. *Genome biology* 10(3):R25.
8. Heinz S, *et al.* (2010) Simple combinations of lineage-determining transcription factors prime cis-regulatory elements required for macrophage and B cell identities. *Molecular cell* 38(4):576-589.
9. Krueger F & Andrews SR (2011) Bismark: a flexible aligner and methylation caller for Bisulfite-Seq applications. *Bioinformatics* 27(11):1571-1572.
10. Langmead B & Salzberg SL (2012) Fast gapped-read alignment with Bowtie 2. *Nature methods* 9(4):357-359.
11. Trapnell C, Pachter L, & Salzberg SL (2009) TopHat: discovering splice junctions with RNA-Seq. *Bioinformatics* 25(9):1105-1111.
12. Pruitt KD, Tatusova T, Brown GR, & Maglott DR (2012) NCBI Reference Sequences (RefSeq): current status, new features and genome annotation policy. *Nucleic acids research* 40(Database issue):D130-135.
13. Anders S & Huber W (2010) Differential expression analysis for sequence count data. *Genome biology* 11(10):R106.
14. Chavez L, *et al.* (2010) Computational analysis of genome-wide DNA methylation during the differentiation of human embryonic stem cells along the endodermal lineage. *Genome research* 20(10):1441-1450.
15. Wei G, *et al.* (2011) Genome-wide analyses of transcription factor GATA3-mediated gene regulation in distinct T cell types. *Immunity* 35(2):299-311.

16. Wei G, *et al.* (2009) Global mapping of H3K4me3 and H3K27me3 reveals specificity and plasticity in lineage fate determination of differentiating CD4+ T cells. *Immunity* 30(1):155-167.
17. Zhang J, *et al.* (2012) Harnessing of the nucleosome-remodeling-deacetylase complex controls lymphocyte development and prevents leukemogenesis. *Nature immunology* 13(1):86-94.
18. Zhang JA, Mortazavi A, Williams BA, Wold BJ, & Rothenberg EV (2012) Dynamic transformations of genome-wide epigenetic marking and transcriptional control establish T cell identity. *Cell* 149(2):467-482.
19. Backes C, *et al.* (2007) GeneTrail--advanced gene set enrichment analysis. *Nucleic acids research* 35(Web Server issue):W186-192.

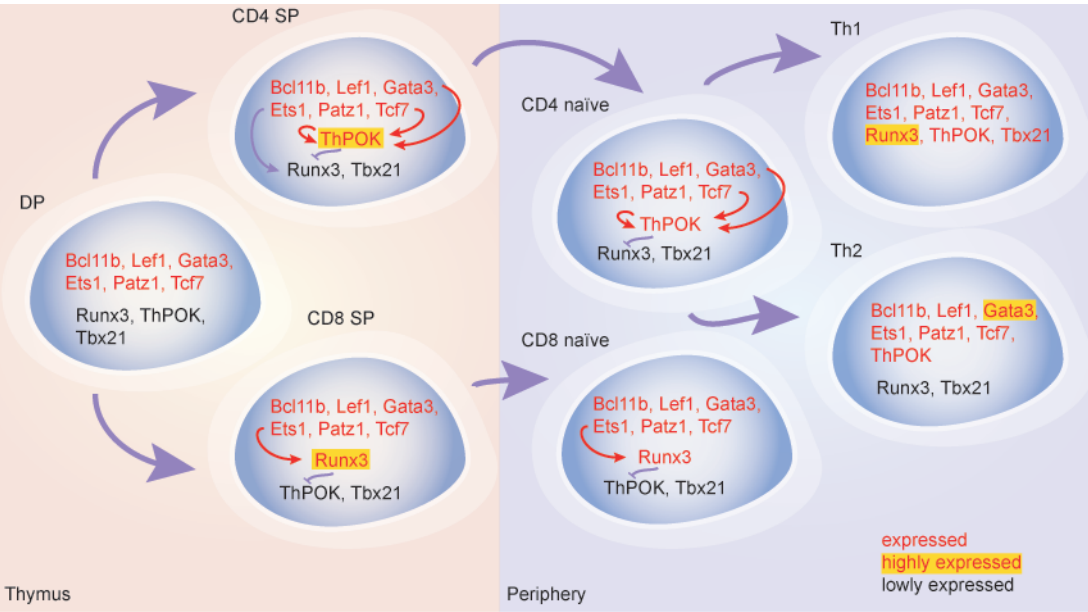

Supplementary Figure 1

**a**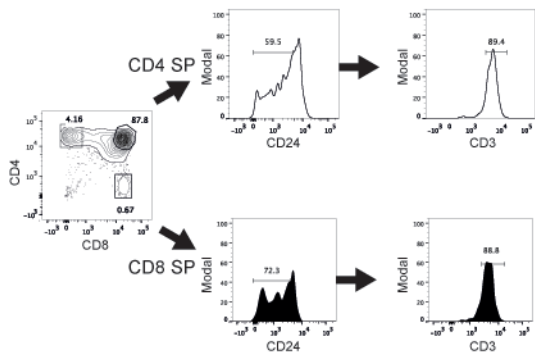**b**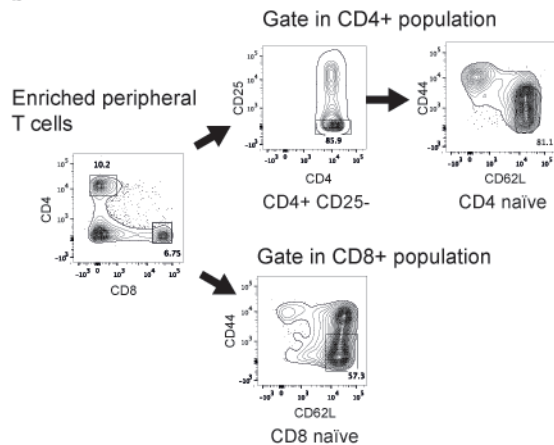**c**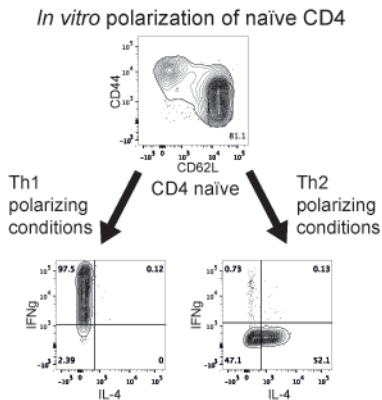

Supplementary Figure 2

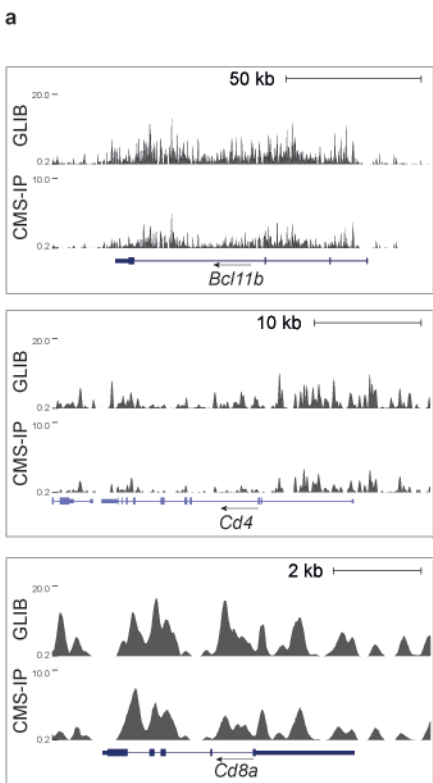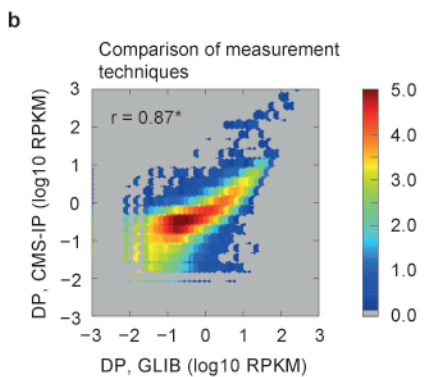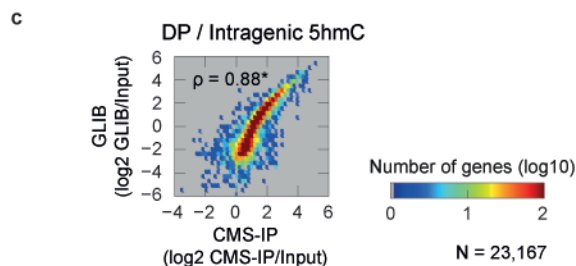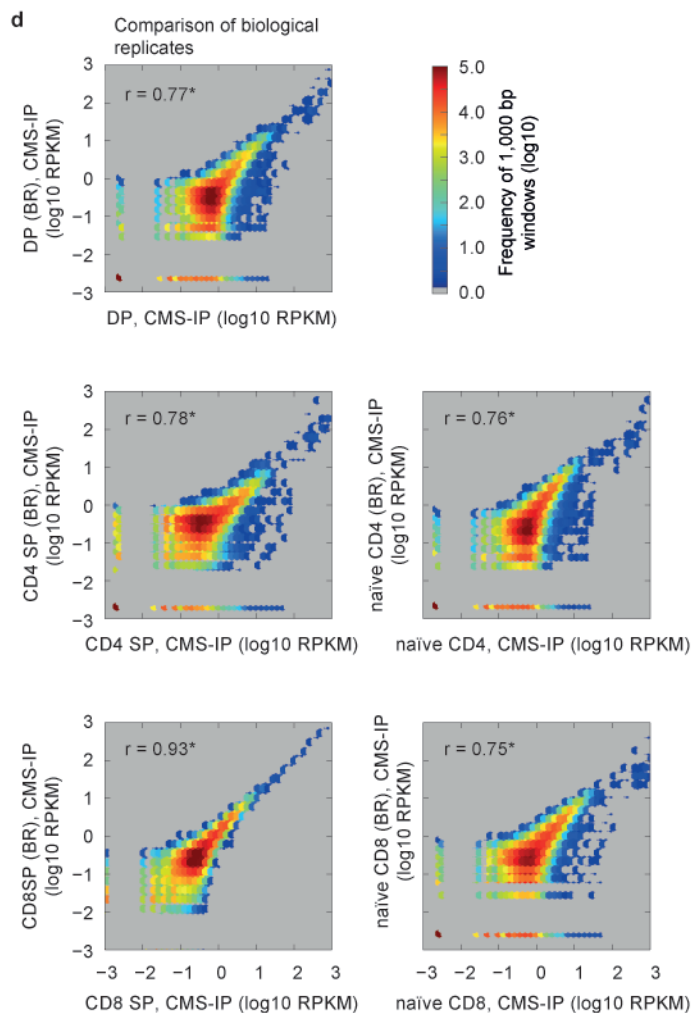

5hmC (anti-CMS DNA dot blot)

Standard DNA

Naïve CD4

Th1 18 hours

Th2 18 hours

Th1 36 hours

Th2 36 hours

Th1 day 5

Th2 day 5

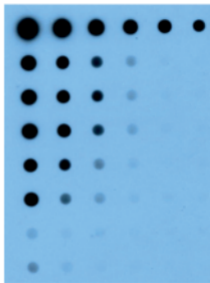

Serial dilution 1:2

Supplementary Figure 4

# Immune-related GO categories enriched in at least one gene cluster

GO categories, N = 141

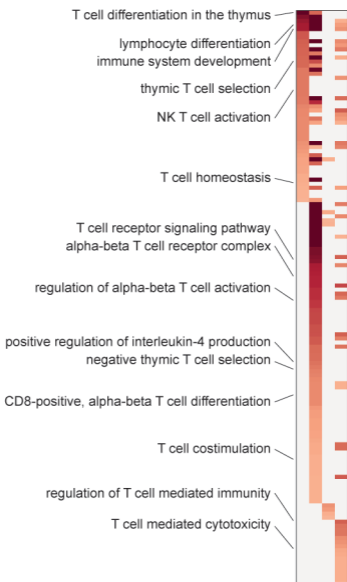

Cluster 1, N = 331  
Cluster 2, N = 1,290  
Cluster 4, N = 2,248  
Cluster 6, N = 2,625

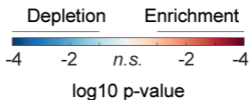

## Supplementary Figure 5

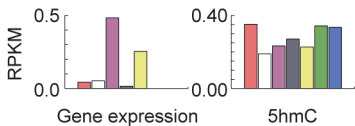

5hmC (CMS-IP)

1 kb

DP  
 CD4 SP  
 CD8 SP  
 naïve CD4  
 naïve CD8  
 Th1  
 Th2

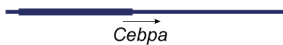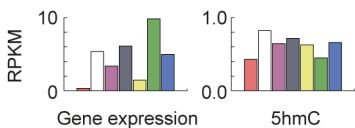

5 kb

DP  
 CD4 SP  
 CD8 SP  
 naïve CD4  
 naïve CD8  
 Th1  
 Th2

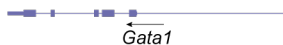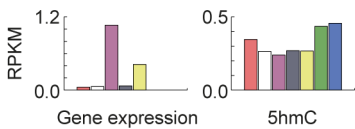

100 kb

DP  
 CD4 SP  
 CD8 SP  
 naïve CD4  
 naïve CD8  
 Th1  
 Th2

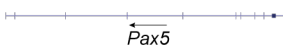

Supplementary Figure 6



## Biological sample #1

## Biological sample #2

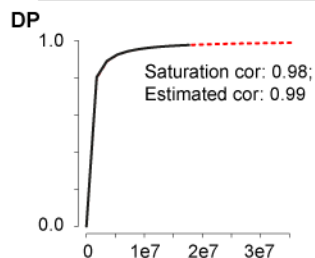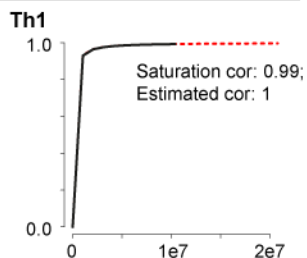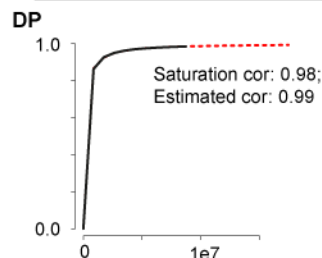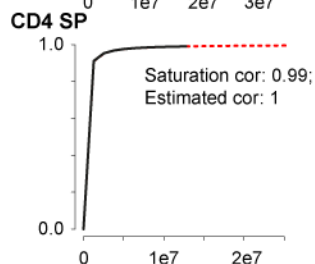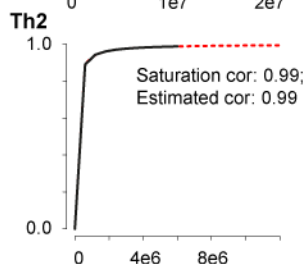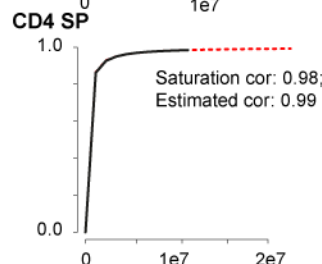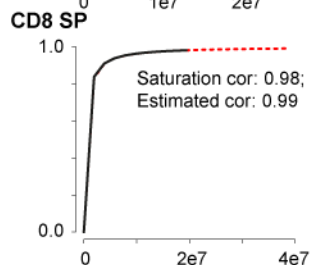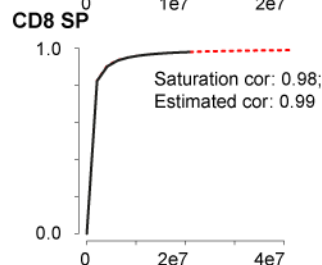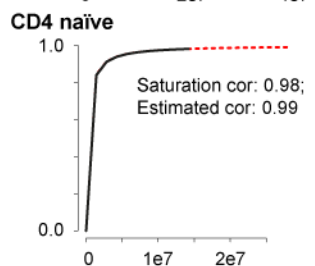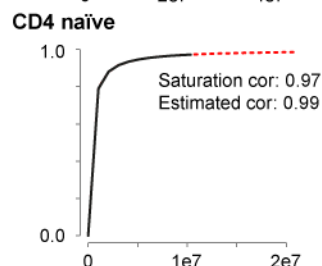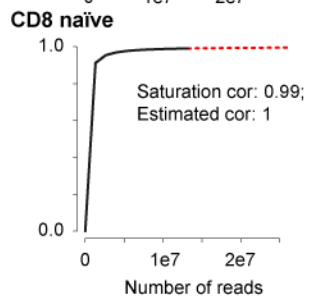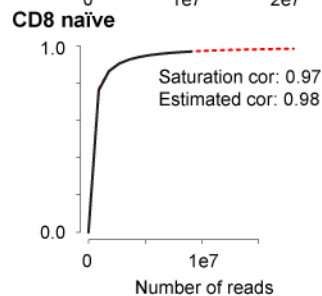

**a**

| Input    | Properly paired | DP         | CD4 SP     | naïve CD4  | naïve CD8  | Th1        | Th2        |
|----------|-----------------|------------|------------|------------|------------|------------|------------|
|          | 1st run         |            | 36,007,730 | 41,955,726 | 33,339,468 | 34,412,842 | 35,265,652 |
| 2nd run  |                 | 49,124,368 | 54,473,620 | 45,864,952 | 47,559,288 | 47,707,658 | 40,473,714 |
| Combined |                 | 85,132,098 | 96,429,346 | 79,204,420 | 81,972,130 | 82,973,310 | 69,833,094 |

| CMS-IP   | Properly paired | DP         | CD4 SP     | naïve CD4  | naïve CD8  | Th1        | Th2        |
|----------|-----------------|------------|------------|------------|------------|------------|------------|
|          | 1st run         |            | 23,981,430 | 21,646,366 | 24,534,124 | 25,906,174 | 22,367,958 |
| 2nd run  |                 | 54,373,924 | 50,199,558 | 54,653,976 | 60,301,816 | 52,844,026 | 34,623,618 |
| Combined |                 | 78,355,354 | 71,845,924 | 79,188,100 | 86,207,990 | 75,211,984 | 47,484,290 |

**b**

| Properly paired | CD8 SP     | CD8 SP (BR) |
|-----------------|------------|-------------|
| Input           | 47,991,615 | 49,967,657  |
| CMS-IP          | 44,617,158 | 51,004,759  |

**d**

| Properly paired | DP          |
|-----------------|-------------|
| Input           | 139,276,970 |
| GLIB            | 187,353,802 |

**c**

| Properly paired | DP (BR)    | naïve CD4 (BR) | naïve CD8 (BR) |
|-----------------|------------|----------------|----------------|
| Input           | 34,232,316 | 34,232,749     | 25,516,551     |
| CMS-IP          | 20,111,364 | 22,791,194     | 18,622,543     |

**e**

| Properly paired | CD4 SP (BR) |
|-----------------|-------------|
| Input           | 96,041,340  |
| CMS-IP          | 48,152,562  |

Supplementary Table 1

**a****1st run**

| Input | Bisulfite conversion | DP     | CD4 SP | naïve CD4 | naïve CD8 | Th1    | Th2    |
|-------|----------------------|--------|--------|-----------|-----------|--------|--------|
|       | CpG                  | 0.9994 | 0.9993 | 0.9993    | 0.9991    | 0.9993 | 0.9994 |
| CHG   | 0.9991               | 0.9992 | 0.9992 | 0.9990    | 0.9992    | 0.9991 |        |
| CHH   | 0.9993               | 0.9993 | 0.9993 | 0.9983    | 0.9992    | 0.9993 |        |

| CMS-IP | Bisulfite conversion | DP     | CD4 SP | naïve CD4 | naïve CD8 | Th1    | Th2    |
|--------|----------------------|--------|--------|-----------|-----------|--------|--------|
|        | CpG                  | 0.9996 | 0.9995 | 0.9995    | 0.9992    | 0.9994 | 0.9995 |
| CHG    | 0.9993               | 0.9994 | 0.9993 | 0.9990    | 0.9992    | 0.9993 |        |
| CHH    | 0.9993               | 0.9994 | 0.9994 | 0.9989    | 0.9993    | 0.9994 |        |

**b****2nd run**

| Input | Bisulfite conversion | DP     | CD4 SP | naïve CD4 | naïve CD8 | Th1    | Th2    |
|-------|----------------------|--------|--------|-----------|-----------|--------|--------|
|       | CpG                  | 0.9995 | 0.9994 | 0.9995    | 0.9991    | 0.9994 | 0.9995 |
| CHG   | 0.9994               | 0.9993 | 0.9994 | 0.9991    | 0.9992    | 0.9994 |        |
| CHH   | 0.9995               | 0.9994 | 0.9995 | 0.9991    | 0.9994    | 0.9996 |        |

| CMS-IP | Bisulfite conversion | DP     | CD4 SP | naïve CD4 | naïve CD8 | Th1    | Th2    |
|--------|----------------------|--------|--------|-----------|-----------|--------|--------|
|        | CpG                  | 0.9995 | 0.9996 | 0.9996    | 0.9991    | 0.9995 | 0.9996 |
| CHG    | 0.9996               | 0.9996 | 0.9995 | 0.9990    | 0.9995    | 0.9996 |        |
| CHH    | 0.9995               | 0.9995 | 0.9996 | 0.9991    | 0.9995    | 0.9996 |        |

**c**

| Input | Bisulfite conversion | CD8 SP | CD8 SP (BR) |
|-------|----------------------|--------|-------------|
|       | CpG                  | 0.9992 | 0.9991      |
| CHG   | 0.9990               | 0.9991 |             |
| CHH   | 0.9992               | 0.9992 |             |

| CMS-IP | Bisulfite conversion | CD8 SP | CD8 SP (BR) |
|--------|----------------------|--------|-------------|
|        | CpG                  | 0.9997 | 0.9997      |
| CHG    | 0.9996               | 0.9996 |             |
| CHH    | 0.9997               | 0.9997 |             |

**d****Biological replicates**

| Input | Bisulfite conversion | DP (BR) | naïve CD4 (BR) | naïve CD8 (BR) |
|-------|----------------------|---------|----------------|----------------|
|       | CpG                  | 0.9994  | 0.9992         | 0.9994         |
| CHG   | 0.9993               | 0.9991  | 0.9993         |                |
| CHH   | 0.9993               | 0.9992  | 0.9994         |                |

| CMS-IP | Bisulfite conversion | DP (BR) | naïve CD4 (BR) | naïve CD8 (BR) |
|--------|----------------------|---------|----------------|----------------|
|        | CpG                  | 0.9996  | 0.9990         | 0.9997         |
| CHG    | 0.9995               | 0.9990  | 0.9995         |                |
| CHH    | 0.9995               | 0.9992  | 0.9996         |                |

| Input | Bisulfite conversion | CD4 SP (BR) |
|-------|----------------------|-------------|
|       | CpG                  | 0.9994      |
| CHG   | 0.9992               |             |
| CHH   | 0.9994               |             |

| CMS-IP | Bisulfite conversion | CD4 SP (BR) |
|--------|----------------------|-------------|
|        | CpG                  | 0.9995      |
| CHG    | 0.9995               |             |
| CHH    | 0.9996               |             |

**a**

| RNA-seq | Cell type | GEO Accession(s)     | PMID     |
|---------|-----------|----------------------|----------|
|         | DP        | GSM774312, GSM774313 | 22500808 |
|         | CD4 SP    | GSM758717            | 22379031 |
|         | CD8 SP    | GSM758719            | 22379031 |
|         | Th1       | GSM523209            | 21867929 |
|         | Th2       | GSM523211            | 21867929 |

**b**

| DP | ChIP     | GEO Accession(s)     | PMID     |
|----|----------|----------------------|----------|
|    | H3K4me3  | GSM523699            | 21867929 |
|    | H3K27me3 | GSM774289, GSM774290 | 22500808 |
|    | H3K36me3 | GSM803115            | 22080921 |
|    | PoIII    | GSM803116            | 22080921 |

| DP | Input    | GEO Accession(s) | PMID     |
|----|----------|------------------|----------|
|    | H3K4me3  | GSM774302        | 22500808 |
|    | H3K27me3 | GSM774302        | 22500808 |
|    | H3K36me3 | GSM803109        | 22080921 |
|    | PoIII    | GSM803109        | 22080921 |

**c**

| H3K4me3 | Cell type | GEO Accession(s) | PMID     |
|---------|-----------|------------------|----------|
|         | CD4 SP    | GSM758726        | 22379031 |
|         | CD8 SP    | GSM758729        | 22379031 |
|         | naïve CD4 | GSM361997        | 19144320 |
|         | Th1       | GSM361999        | 19144320 |
|         | Th2       | GSM362001        | 19144320 |

**d**

| ES | ChIP     | GEO Accession(s) | PMID     |
|----|----------|------------------|----------|
|    | H3K36me3 | GSM307620        | 17603471 |
|    | PoIII    | GSM307623        | 17603471 |

Supplementary Table 3

## DP

- Not expressed ( $< 0.1$ ), N = 9,994
- Lowly expressed ( $< 1$ ), N = 2,821
- Moderately expressed ( $< 10$ ), N = 3,996
- Highly expressed ( $< 100$ ), N = 5,672
- Extremely highly expressed, N = 684

## CD8 SP

- not expressed ( $< 0.1$ ), N = 9,782
- lowly expressed ( $< 1$ ), N = 2,897
- moderately expressed ( $< 10$ ), N = 4,221
- highly expressed ( $< 100$ ), N = 5,652
- extremely highly expressed ( $\geq 100$ ), N = 615

## CD4 SP

- not expressed ( $< 0.1$ ), N = 9,966
- lowly expressed ( $< 1$ ), N = 2,772
- moderately expressed ( $< 10$ ), N = 3,971
- highly expressed ( $\geq 100$ ), N = 5,861
- extremely highly expressed ( $\geq 100$ ), N = 597

## CD8 naïve

- not expressed ( $< 0.1$ ), N = 11,270
- lowly expressed ( $< 1$ ), N = 1,991
- moderately expressed ( $< 10$ ), N = 3,857
- highly expressed ( $\geq 100$ ), N = 5,477
- extremely highly expressed ( $\geq 100$ ), N = 572

## CD4 naïve

- not expressed ( $< 0.1$ ), N = 11,161
- lowly expressed ( $< 1$ ), N = 2,101
- moderately expressed ( $< 10$ ), N = 3,716
- highly expressed ( $\geq 100$ ), N = 5,601
- extremely highly expressed ( $\geq 100$ ), N = 588

## Th1

- not expressed ( $< 0.1$ ), N = 11,630
- lowly expressed ( $< 1$ ), N = 2,146
- moderately expressed ( $< 10$ ), N = 4,556
- highly expressed ( $< 100$ ), N = 3,956
- extremely highly expressed ( $\geq 100$ ), N = 879

## Th2

- not expressed ( $< 0.1$ ), N = 10,830
- lowly expressed ( $< 1$ ), N = 2,664
- moderately expressed ( $< 10$ ), N = 4,732
- highly expressed ( $\geq 100$ ), N = 3,988
- extremely highly expressed ( $\geq 100$ ), N = 953

|           | 5'UTR | 3'UTR | TTS | Promoter | Exon  | Intron | Intergenic | Total  |
|-----------|-------|-------|-----|----------|-------|--------|------------|--------|
| DP        | 7     | 112   | 197 | 333      | 620   | 6835   | 5,320      | 13,424 |
| CD4 SP    | 16    | 148   | 238 | 465      | 956   | 10,543 | 5,614      | 17,980 |
| CD8 SP    | 14    | 168   | 294 | 507      | 990   | 11,620 | 5,374      | 18,967 |
| naïve CD4 | 11    | 116   | 216 | 367      | 756   | 8519   | 3,657      | 13,642 |
| naïve CD8 | 10    | 185   | 387 | 612      | 1,216 | 12,422 | 5,338      | 20,170 |
| Th1       | 1     | 6     | 7   | 5        | 22    | 276    | 231        | 548    |
| Th2       | 3     | 22    | 59  | 47       | 164   | 2,195  | 1,725      | 4,215  |

Number of HERGs

Supplementary Table 5

**Supplementary Table 6. List of genes per cluster depicted in Fig. 5a.**

| <b>Cluster 1</b>     |             |                                            |               |                  |                  |
|----------------------|-------------|--------------------------------------------|---------------|------------------|------------------|
| <b>Gene symbol</b>   | <b>DP</b>   | <b>Intragenic 5hmC (log2 CMS-IP/Input)</b> |               |                  |                  |
|                      |             | <b>CD4 SP</b>                              | <b>CD8 SP</b> | <b>naïve CD4</b> | <b>naïve CD8</b> |
| <i>Anxa2</i>         | 2,38469889  | 1,701110556                                | 1,696539606   | 1,294588409      | 1,36577048       |
| <i>9430014N10Rik</i> | 2,353675832 | 1,678023064                                | 1,874557506   | 1,307391797      | 1,309179248      |
| <i>Ldlrad3</i>       | 2,214927888 | 1,700351239                                | 1,735698292   | 1,308598739      | 1,407575305      |
| <i>Dntt</i>          | 2,214792305 | 1,611002936                                | 1,746983811   | 1,246169013      | 1,456542705      |
| <i>Capn3</i>         | 2,439735165 | 1,816438097                                | 1,83647562    | 1,387476948      | 1,405902738      |
| <i>BC057022</i>      | 2,424910345 | 1,82593762                                 | 1,841552307   | 1,404888339      | 1,46097372       |
| <i>Ng23</i>          | 2,489498451 | 1,613208161                                | 1,792709068   | 1,427458112      | 1,478931271      |
| <i>4930449E01Rik</i> | 2,300413991 | 1,441014424                                | 1,828991824   | 1,497443462      | 1,408092902      |
| <i>Hmgb1</i>         | 2,551997696 | 1,608860474                                | 1,630146757   | 1,476110134      | 1,643993761      |
| <i>Tifab</i>         | 2,540205855 | 1,502572988                                | 1,707200203   | 1,472749633      | 1,567998926      |
| <i>Hist1h2bp</i>     | 2,636093036 | 1,393553757                                | 1,702336546   | 1,39439269       | 1,409475669      |
| <i>Gpr162</i>        | 2,771376398 | 1,729391092                                | 1,680615244   | 1,491369518      | 1,395652345      |
| <i>4933422H20Rik</i> | 2,581387912 | 1,738650689                                | 1,533638917   | 1,491843008      | 1,359231915      |
| <i>Bst1</i>          | 2,437392867 | 1,835115298                                | 1,750107362   | 1,205443913      | 1,645669719      |
| <i>Agtrap</i>        | 2,648775344 | 1,854637706                                | 1,584739815   | 1,285417221      | 1,531980086      |
| <i>Tubb2a</i>        | 2,396057566 | 1,884664319                                | 1,493658098   | 1,526759704      | 1,72223731       |
| <i>Galk1</i>         | 2,662679819 | 1,810907284                                | 1,591929121   | 1,527007211      | 1,734990887      |
| <i>Olig3</i>         | 2,287760478 | 2,052210795                                | 1,657728912   | 1,505338037      | 1,351596299      |
| <i>Rbp7</i>          | 2,140756224 | 2,044471374                                | 1,766607837   | 1,405139766      | 1,352065317      |
| <i>2810454H06Rik</i> | 2,294478461 | 1,820913861                                | 1,613302846   | 1,325085329      | 1,18737959       |
| <i>1600002D24Rik</i> | 2,336249069 | 1,818507999                                | 1,706733123   | 1,283666666      | 1,281244804      |
| <i>Gm8615</i>        | 2,285615876 | 1,979187266                                | 1,379503147   | 1,243558         | 1,230755772      |
| <i>Cd1d2</i>         | 2,411859365 | 1,882389798                                | 1,325980277   | 1,096042352      | 1,459992355      |
| <i>Lrdd</i>          | 1,917431117 | 1,483766064                                | 1,291354537   | 1,401753889      | 1,650274625      |
| <i>Thap11</i>        | 1,996865831 | 1,567301147                                | 1,204956224   | 1,264201733      | 1,524374528      |
| <i>Ifitm3</i>        | 2,111941203 | 1,637570133                                | 1,324349091   | 1,538553401      | 1,520469287      |
| <i>Ly6c2</i>         | 2,229650843 | 1,617539309                                | 1,098648058   | 1,395890018      | 1,947970507      |
| <i>Jag2</i>          | 2,033676541 | 1,448770848                                | 1,418511628   | 1,39703742       | 1,34408137       |
| <i>Fastk</i>         | 2,178344299 | 1,455754791                                | 1,528990991   | 1,453891939      | 1,276722266      |
| <i>Nfatc3</i>        | 2,103201037 | 1,500971122                                | 1,52462306    | 1,437684094      | 1,489036906      |
| <i>Cdk5rap3</i>      | 2,085007631 | 1,618816219                                | 1,538799359   | 1,470198462      | 1,419314923      |
| <i>Irf8</i>          | 2,024164521 | 1,695101211                                | 1,592317469   | 1,307786516      | 1,302938563      |
| <i>Entpd7</i>        | 1,942220928 | 1,674539022                                | 1,616546669   | 1,319465362      | 1,188273644      |
| <i>Lag3</i>          | 2,063090644 | 1,611998402                                | 1,542988483   | 1,372151667      | 1,136294141      |
| <i>E130303B06Rik</i> | 1,936223365 | 1,561278696                                | 1,60591424    | 1,457435481      | 1,249784098      |
| <i>1700108F19Rik</i> | 2,032965117 | 1,5739803                                  | 1,431604944   | 1,169292473      | 1,171004922      |
| <i>Serinc5</i>       | 2,129085365 | 1,65144955                                 | 1,502171078   | 1,117645646      | 1,17079246       |
| <i>Tle6</i>          | 2,247695868 | 1,556494139                                | 1,378639372   | 1,17103778       | 1,244171282      |
| <i>Spc24</i>         | 2,028458016 | 1,299663349                                | 1,780567183   | 1,099667907      | 1,649605992      |
| <i>Pdzd3</i>         | 1,98132532  | 1,235456402                                | 1,700748006   | 1,203049173      | 1,417702442      |
| <i>Afmid</i>         | 2,13427656  | 1,220602223                                | 1,545612836   | 1,314912143      | 1,634563622      |
| <i>Tctex1d1</i>      | 2,43757228  | 1,424038622                                | 1,453206673   | 0,952247206      | 1,213472771      |
| <i>Gcnt7</i>         | 2,338813631 | 1,501796071                                | 1,484630405   | 0,908034883      | 1,436390333      |
| <i>Rab44</i>         | 2,535179396 | 1,597177759                                | 1,438474417   | 1,122097032      | 1,184626715      |
| <i>Tmprss4</i>       | 2,417548521 | 1,587728033                                | 1,422588964   | 1,067761205      | 1,183000095      |
| <i>Commd4</i>        | 2,255161046 | 1,712012583                                | 1,610382021   | 1,080402378      | 1,466562539      |

|               |             |             |             |             |             |
|---------------|-------------|-------------|-------------|-------------|-------------|
| Zfr2          | 2,284919818 | 1,64193582  | 1,655898198 | 1,20667136  | 1,552051735 |
| Cdca7         | 2,412267362 | 1,752773016 | 1,584265878 | 1,17424713  | 1,446982243 |
| Tmem140       | 2,023479854 | 1,721080907 | 1,661139325 | 1,188541826 | 1,401331779 |
| Ttc16         | 2,054315191 | 1,524235898 | 1,597190095 | 1,243653057 | 1,317568685 |
| 1810043H04Rik | 2,033839132 | 1,695971467 | 1,799874303 | 1,202576063 | 1,20351258  |
| Tdrd5         | 2,185910358 | 1,509283287 | 1,779837401 | 1,140043656 | 1,422645473 |
| Gm12709       | 1,963194731 | 1,462254265 | 1,537797331 | 1,055879609 | 1,272609953 |
| Mad1l1        | 2,089539107 | 1,506227152 | 1,584342952 | 1,059216571 | 1,207057501 |
| Fam163b       | 2,028433801 | 1,460466162 | 1,708020763 | 1,009153443 | 1,293580531 |
| Plekhf1       | 2,278025755 | 1,630445787 | 1,803913726 | 1,035928622 | 1,248002172 |
| Lingo4        | 2,297140395 | 1,634233701 | 1,834222418 | 0,87627203  | 1,247535026 |
| InsI5         | 2,128343443 | 1,554987933 | 1,764444411 | 0,802896915 | 1,241064595 |
| Ctla4         | 1,86733614  | 1,885996048 | 1,681399747 | 1,608684396 | 1,662839052 |
| Sirt2         | 1,915217189 | 1,93430159  | 1,746498852 | 1,636908747 | 1,712505387 |
| Gm5122        | 1,955342627 | 1,962413377 | 1,534187379 | 1,497003419 | 1,728303554 |
| Trappc1       | 1,743852415 | 1,895368052 | 1,52506119  | 1,559467359 | 1,48601963  |
| 4930405J17Rik | 1,933211094 | 2,020687037 | 1,821511467 | 1,530632901 | 1,365918314 |
| Ccr9          | 1,994479383 | 2,152790235 | 1,769978002 | 1,49864267  | 1,446867005 |
| Klraq1        | 2,153924206 | 1,877477889 | 1,681428833 | 1,694284282 | 1,540010247 |
| 4931403G20Rik | 2,190931635 | 1,757509012 | 1,549437388 | 1,671080936 | 1,59160467  |
| BC049352      | 2,096926566 | 1,710870247 | 1,72781375  | 1,774173382 | 1,676750386 |
| Gm11744       | 2,000609393 | 1,657853627 | 1,543125581 | 1,774824376 | 1,444318975 |
| Chst10        | 1,915465043 | 1,62563641  | 1,554869527 | 1,661415976 | 1,535793334 |
| 2810021J22Rik | 2,227687362 | 1,955308472 | 1,981817211 | 1,604842048 | 1,538025455 |
| Myb           | 2,119050182 | 1,989062534 | 1,870280554 | 1,571386421 | 1,430627329 |
| Ccdc107       | 2,097118412 | 1,752269119 | 1,948194181 | 1,457402703 | 1,404691264 |
| Lipa          | 2,191883058 | 1,807240983 | 1,730051316 | 1,557986251 | 1,508585799 |
| Fam125b       | 2,281436394 | 1,806840389 | 1,829084405 | 1,475369228 | 1,552972501 |
| Serpinf1      | 2,352098528 | 1,780016915 | 1,689570922 | 1,595079294 | 1,356458251 |
| Sla           | 2,298348008 | 1,986636026 | 1,845846443 | 1,631931266 | 1,688364843 |
| Alg14         | 2,283276755 | 2,087148528 | 1,823294671 | 1,62042104  | 1,588054272 |
| 1700026D11Rik | 2,23323565  | 1,897321909 | 1,84552333  | 1,592149085 | 1,626983133 |
| Spint2        | 2,206999827 | 1,982052963 | 1,823104093 | 1,594614155 | 1,575199223 |
| Tuba8         | 2,118754044 | 1,925937246 | 1,795319076 | 1,62257044  | 1,630954235 |
| Atl2          | 2,023621433 | 1,801300344 | 1,812553979 | 1,500506388 | 1,566935671 |
| Vangl2        | 2,020640846 | 1,789767533 | 1,861199132 | 1,578499525 | 1,633245518 |
| Tspan3        | 2,149632661 | 1,811543973 | 1,848192981 | 1,52812629  | 1,700299328 |
| Mip           | 2,097937075 | 1,811110388 | 1,858284352 | 1,353888198 | 1,773723963 |
| Lgals9        | 2,24895064  | 1,726300198 | 1,869918793 | 1,634473697 | 1,769426455 |
| Tmem184b      | 2,216672309 | 1,777675844 | 1,869525126 | 1,596076709 | 1,818294385 |
| Bckdha        | 2,212326631 | 1,649166469 | 1,819291472 | 1,493859135 | 1,788369954 |
| 4930428O21Rik | 2,236919454 | 1,818455204 | 2,006335565 | 1,521434268 | 1,724254414 |
| Sec14l1       | 2,256057436 | 1,808884205 | 1,985854802 | 1,551909962 | 1,681238198 |
| F2            | 2,288753378 | 1,757286077 | 1,956458154 | 1,591580907 | 1,641507268 |
| Icam2         | 1,881509993 | 1,556412607 | 1,573571946 | 1,475776998 | 1,621243148 |
| Camk1g        | 1,837550403 | 1,697094659 | 1,627822762 | 1,416995552 | 1,602874104 |
| Flt3          | 1,846103367 | 1,664958795 | 1,700798467 | 1,583900213 | 1,647495047 |
| Dck           | 2,02063514  | 1,645996782 | 1,528430414 | 1,514337967 | 1,595175369 |
| 1810012P15Rik | 2,095274454 | 1,755223178 | 1,636688664 | 1,516694606 | 1,573226145 |
| Pgls          | 2,130419229 | 1,500675957 | 1,733313672 | 1,506988061 | 1,580875445 |
| Phlda3        | 2,083183299 | 1,552892037 | 1,814170118 | 1,346616885 | 1,734121218 |



|                      |             |             |             |             |             |
|----------------------|-------------|-------------|-------------|-------------|-------------|
| <i>Slc25a37</i>      | 1,987188943 | 1,709209565 | 1,802457541 | 1,440173688 | 1,526873491 |
| <i>6430598A04Rik</i> | 2,058636254 | 1,710527701 | 1,722674614 | 1,378247321 | 1,474261159 |
| <i>Edaradd</i>       | 1,881265444 | 1,766947499 | 1,752296414 | 1,312865999 | 1,41511971  |
| <i>Obfc2a</i>        | 1,959890579 | 1,897707805 | 1,774018187 | 1,339951411 | 1,57834166  |
| <i>Ralb</i>          | 1,980303495 | 1,835062806 | 1,941484387 | 1,230802032 | 1,678877999 |
| <i>Tmprss3</i>       | 1,9254109   | 1,734587351 | 1,883069701 | 1,064333517 | 1,703137682 |
| <i>Clk3</i>          | 1,867773045 | 1,650626595 | 1,83548075  | 1,356873644 | 1,852535756 |
| <i>Cass4</i>         | 1,754351275 | 1,67921119  | 1,823085668 | 1,272551224 | 1,841974575 |
| <i>Bmf</i>           | 1,891495926 | 1,459917795 | 1,974534557 | 1,263712349 | 1,63315181  |
| <i>Ifi30</i>         | 1,856807087 | 1,506209904 | 1,782953942 | 1,105414396 | 1,736825292 |
| <i>Syngn3</i>        | 1,816105259 | 1,559574466 | 1,866336676 | 1,263003178 | 1,623226754 |
| <i>Mc1r</i>          | 1,869528599 | 1,628745899 | 1,821139941 | 1,328015882 | 1,627415256 |
| <i>Trim11</i>        | 1,982930253 | 1,502195186 | 1,794041366 | 1,325590098 | 1,692716123 |
| <i>Plxdc1</i>        | 1,89680002  | 1,469899284 | 1,735723015 | 1,295624346 | 1,694885198 |
| <i>D1Erttd622e</i>   | 1,783740459 | 1,555555104 | 1,818241227 | 1,418362651 | 1,76386591  |
| <i>Ly6k</i>          | 1,83874347  | 1,489237434 | 1,754973716 | 1,402946034 | 1,734466422 |
| <i>Wsb2</i>          | 1,59901072  | 1,624915831 | 1,55482503  | 1,322646941 | 1,547865283 |
| <i>Gins2</i>         | 1,719090944 | 1,573426953 | 1,510453956 | 1,265629708 | 1,553556929 |
| <i>Zfp238</i>        | 1,721616445 | 1,618859024 | 1,648460528 | 1,20904819  | 1,572334739 |
| <i>Katnal1</i>       | 1,710509863 | 1,476739629 | 1,551047367 | 1,346811576 | 1,431559198 |
| <i>Auh</i>           | 1,694873455 | 1,494184725 | 1,595404224 | 1,334862119 | 1,534219807 |
| <i>Zcchc24</i>       | 1,763709449 | 1,632873696 | 1,507822865 | 1,271788966 | 1,368151932 |
| <i>Stx6</i>          | 1,747253547 | 1,653964006 | 1,549615459 | 1,293036798 | 1,452806974 |
| <i>Pofut1</i>        | 1,79497654  | 1,7184758   | 1,617759958 | 1,394211526 | 1,357806725 |
| <i>Ephx3</i>         | 1,93112084  | 1,45542178  | 1,749889889 | 1,391285514 | 1,446253864 |
| <i>Zfp768</i>        | 1,963500185 | 1,417688759 | 1,709382804 | 1,505405772 | 1,553384189 |
| <i>Fbxo27</i>        | 1,911257876 | 1,328071494 | 1,628235351 | 1,380100009 | 1,541735795 |
| <i>Irf6</i>          | 1,792631905 | 1,55422147  | 1,575129299 | 1,372517288 | 1,475481999 |
| <i>Camk2a</i>        | 1,853022696 | 1,593728712 | 1,577855511 | 1,346199853 | 1,543060566 |
| <i>Nlrx1</i>         | 1,882961458 | 1,508591785 | 1,524530696 | 1,341123614 | 1,54679245  |
| <i>Ccdc134</i>       | 1,897394049 | 1,555573559 | 1,66231352  | 1,244102296 | 1,522580258 |
| <i>Capn11</i>        | 2,210412651 | 1,446000323 | 1,158691541 | 1,011066495 | 1,076607727 |
| <i>D830013020Rik</i> | 2,167536465 | 1,520673865 | 1,216083214 | 0,970022456 | 0,971804208 |
| <i>Cep250</i>        | 2,21162456  | 1,443267288 | 1,295830679 | 0,969796732 | 1,183742055 |
| <i>Ppt1</i>          | 2,052662058 | 1,468679438 | 1,256164822 | 1,026189435 | 1,025955984 |
| <i>Gtdc2</i>         | 2,077650424 | 1,426617013 | 1,287483252 | 0,885590101 | 1,041324408 |
| <i>Wdr78</i>         | 1,873505191 | 1,414481074 | 1,305407263 | 0,931751312 | 1,036618624 |
| <i>Ahi1</i>          | 1,954973146 | 1,384704464 | 1,337432769 | 0,989489831 | 1,083931539 |
| <i>Tmem121</i>       | 2,11420917  | 1,164094353 | 1,375245768 | 0,99494817  | 1,213387449 |
| <i>Stra8</i>         | 2,116091903 | 1,286577859 | 1,345661946 | 1,066282567 | 1,094823305 |
| <i>Tmem239</i>       | 2,035220468 | 1,175783943 | 1,509467236 | 1,266889439 | 1,015788459 |
| <i>Clec16a</i>       | 1,829840465 | 1,594341558 | 1,420437286 | 1,233216117 | 1,131197337 |
| <i>Glcci1</i>        | 1,822295383 | 1,480756404 | 1,430383629 | 1,2724071   | 1,15452715  |
| <i>A430090L17Rik</i> | 1,977841514 | 1,452179885 | 1,455810769 | 1,23766493  | 1,027146037 |
| <i>Ptprf</i>         | 1,8370616   | 1,492161214 | 1,396677739 | 1,140153592 | 1,074277284 |
| <i>Dhcr24</i>        | 1,90179963  | 1,502892844 | 1,34268434  | 1,098686011 | 1,038057718 |
| <i>Emp1</i>          | 1,871321387 | 1,542413376 | 1,313122658 | 1,079454891 | 1,142738483 |
| <i>Txnrd2</i>        | 1,814782728 | 1,448977863 | 1,284299465 | 1,159707896 | 1,005649561 |
| <i>Jdp2</i>          | 2,018742781 | 1,409552488 | 1,402675984 | 1,076600524 | 1,215328332 |
| <i>Ccdc162</i>       | 1,90155254  | 1,45701348  | 1,399210208 | 1,096611563 | 1,238258871 |
| <i>Gml</i>           | 1,987826294 | 1,377063074 | 1,308318821 | 1,206456426 | 1,226311866 |

|                      |             |             |             |             |             |
|----------------------|-------------|-------------|-------------|-------------|-------------|
| <i>Bcat2</i>         | 2,018276892 | 1,417876257 | 1,213442502 | 1,182476448 | 1,242345466 |
| <i>Gm15612</i>       | 1,859683929 | 1,384259588 | 1,295408504 | 1,078202493 | 1,144291944 |
| <i>Bcl2l2</i>        | 1,790805679 | 1,281378977 | 1,233364084 | 1,093595419 | 1,094184043 |
| <i>Rreb1</i>         | 1,684093894 | 1,369312525 | 1,27139752  | 1,14232299  | 1,203887869 |
| <i>Sh2d1a</i>        | 1,72205329  | 1,42322531  | 1,314721481 | 1,121833553 | 1,146213194 |
| <i>1700125G22Rik</i> | 2,146402068 | 1,308581776 | 1,229218736 | 0,833629406 | 1,375566514 |
| <i>Klf1</i>          | 1,933403321 | 1,411572105 | 1,121246199 | 0,882731586 | 1,297093893 |
| <i>Tm4sf5</i>        | 1,850458425 | 1,35948083  | 1,532378606 | 0,887967015 | 1,465241483 |
| <i>Hist4h4</i>       | 1,915618842 | 1,536520991 | 1,433321477 | 0,853050373 | 1,386498818 |
| <i>Lynx1</i>         | 1,969652174 | 1,400371075 | 1,351555605 | 0,874445487 | 1,39547682  |
| <i>Mcm2</i>          | 1,998041837 | 1,371930172 | 1,403144484 | 1,019284711 | 1,380761098 |
| <i>Bid</i>           | 1,69632948  | 1,263190287 | 1,310197544 | 1,056223576 | 1,400076771 |
| <i>Sema3b</i>        | 1,788428855 | 1,280233017 | 1,311679752 | 0,959202109 | 1,425031223 |
| <i>Dut</i>           | 1,854288628 | 1,209861428 | 1,332958007 | 0,96491694  | 1,254692149 |
| <i>Scn4b</i>         | 1,834335287 | 1,276152205 | 1,345579943 | 1,030655124 | 1,243210141 |
| <i>Nanos3</i>        | 1,98515632  | 1,167877849 | 1,248915505 | 1,069461304 | 1,347833587 |
| <i>Fgr</i>           | 1,99437761  | 1,187902179 | 1,320410899 | 0,950188947 | 1,389669503 |
| <i>5430421N21Rik</i> | 1,798072569 | 1,73334809  | 1,351580419 | 1,166117473 | 1,141596215 |
| <i>Gm10638</i>       | 1,696799639 | 1,787716838 | 1,602058441 | 1,029121364 | 1,094246174 |
| <i>Ypel2</i>         | 1,784005457 | 1,504920339 | 1,434154101 | 1,132910203 | 0,927915496 |
| <i>Spink2</i>        | 1,757062021 | 1,443206295 | 1,509799056 | 1,219727156 | 1,022614476 |
| <i>Spry1</i>         | 1,639491866 | 1,518410432 | 1,45312166  | 1,219754669 | 0,828065842 |
| <i>Zfyve28</i>       | 1,764109756 | 1,35621897  | 1,39454904  | 1,05265931  | 1,202713949 |
| <i>Igsf8</i>         | 1,868447237 | 1,3219616   | 1,425146844 | 0,992731973 | 1,161322307 |
| <i>Spo11</i>         | 1,775437067 | 1,377029461 | 1,532174315 | 1,074812105 | 1,157514872 |
| <i>C230024C17</i>    | 1,782263221 | 1,545556042 | 1,533495632 | 1,062171455 | 1,195063358 |
| <i>Kcnh2</i>         | 1,618933403 | 1,362875405 | 1,433496955 | 0,963300123 | 1,118500784 |
| <i>Slc39a2</i>       | 1,581771854 | 1,426063047 | 1,460975942 | 0,932715771 | 1,200012786 |
| <i>H2-Q2</i>         | 1,666507187 | 1,464935907 | 1,299242464 | 0,939666725 | 1,119861013 |
| <i>Tbc1d10c</i>      | 2,069795871 | 1,629639575 | 1,535556041 | 0,704892676 | 0,854216526 |
| <i>Comt</i>          | 1,800802865 | 1,608262574 | 1,356178155 | 0,793234147 | 1,010219145 |
| <i>Cited4</i>        | 1,951830713 | 1,472549836 | 0,845821496 | 1,346336708 | 0,874417444 |
| <i>Ly6c1</i>         | 2,049859235 | 1,68091949  | 1,05785227  | 1,549847398 | 1,019337944 |
| <i>1700018L02Rik</i> | 1,756594644 | 1,535598781 | 1,634207497 | 1,703474324 | 0,989525444 |
| <i>Spata5l1</i>      | 1,691995902 | 1,247063248 | 1,497496559 | 1,492489401 | 0,798379004 |
| <i>Ccdc28b</i>       | 1,733420538 | 1,361019052 | 1,192407421 | 1,52157262  | 1,197627452 |
| <i>Cdc42ep4</i>      | 1,765903757 | 1,304987352 | 1,216685551 | 1,480269318 | 1,128830393 |
| <i>Cd1d1</i>         | 1,467345639 | 1,294514734 | 1,166629878 | 1,511986023 | 1,077396704 |
| <i>Gm12522</i>       | 1,654884055 | 1,63374646  | 1,10807397  | 1,510239658 | 1,092799186 |
| <i>Ptprcap</i>       | 1,718015993 | 1,315910121 | 1,59013229  | 1,365816497 | 1,170445085 |
| <i>Atg9b</i>         | 1,618434807 | 1,234650832 | 1,509833819 | 1,386798753 | 1,168342021 |
| <i>Apoe</i>          | 1,662075667 | 1,324777388 | 1,449050764 | 1,44072373  | 1,310864905 |
| <i>Maf1</i>          | 1,57227778  | 1,323504426 | 1,790691731 | 1,391383386 | 1,363905793 |
| <i>Baiap2l2</i>      | 1,356551674 | 1,513993908 | 1,614077051 | 1,277355647 | 1,293105858 |
| <i>Fam108c</i>       | 1,378732942 | 1,606871393 | 1,597861351 | 1,212982693 | 1,236365382 |
| <i>1700001D01Rik</i> | 1,477021027 | 1,739169622 | 1,691777379 | 1,298109439 | 1,114684081 |
| <i>Rbl2</i>          | 1,512484951 | 1,655820308 | 1,473483215 | 1,311970375 | 1,361823637 |
| <i>L3mbtl3</i>       | 1,505852216 | 1,742786332 | 1,509845004 | 1,427773228 | 1,300847834 |
| <i>2610307P16Rik</i> | 1,61714789  | 1,626396206 | 1,58635846  | 1,21942209  | 1,219446565 |
| <i>Ankrd50</i>       | 1,525214517 | 1,643031958 | 1,582270197 | 1,258557653 | 1,288115378 |
| <i>Fas</i>           | 1,579680725 | 1,647697633 | 1,479361772 | 1,213279142 | 1,282014873 |

|                      |             |             |             |             |             |
|----------------------|-------------|-------------|-------------|-------------|-------------|
| <i>A430107P09Rik</i> | 2,250115499 | 1,73567455  | 1,280976427 | 0,86083409  | 1,194918245 |
| <i>Id3</i>           | 2,320659906 | 1,648158873 | 1,372681355 | 0,707854887 | 1,032240446 |
| <i>Arrdc5</i>        | 2,464450351 | 1,817278311 | 1,529854264 | 0,67781578  | 1,187570343 |
| <i>Ltb</i>           | 2,570803266 | 1,633088112 | 1,49144923  | 0,965208474 | 1,048652497 |
| <i>B230118H07Rik</i> | 2,469432526 | 1,622179804 | 1,464701023 | 0,849327913 | 0,897100753 |
| <i>1810019D21Rik</i> | 2,343891852 | 1,516513901 | 1,061066471 | 0,880377703 | 1,504114855 |
| <i>Prss57</i>        | 2,539672057 | 1,2371473   | 1,267782323 | 0,923139355 | 1,03866821  |
| <i>Fstl3</i>         | 2,178031628 | 1,248463492 | 1,457875976 | 0,634574262 | 0,989438865 |
| <i>Tmem151b</i>      | 2,223056443 | 1,393959286 | 1,312000457 | 0,879777787 | 0,810649262 |
| <i>Syt13</i>         | 2,159669532 | 1,381635034 | 1,205793018 | 0,812180222 | 0,710279928 |
| <i>2010109I03Rik</i> | 2,317218935 | 1,307452032 | 1,262766215 | 0,937592205 | 0,895168478 |
| <i>Ptcra</i>         | 2,358470725 | 1,405741715 | 1,218002401 | 0,866573804 | 0,892092248 |
| <i>C330024C12Rik</i> | 2,503096621 | 1,442953632 | 1,188154325 | 0,791725613 | 0,667650093 |
| <i>Fam43a</i>        | 2,631752485 | 1,056556843 | 1,639001141 | 1,169934005 | 1,043097298 |
| <i>Fam166b</i>       | 2,870200106 | 1,313735703 | 1,599149372 | 1,000497114 | 1,21099651  |
| <i>5730422E09Rik</i> | 2,560353535 | 1,769928545 | 1,556705136 | 1,253967179 | 1,194580529 |
| <i>Xrra1</i>         | 2,421394038 | 1,707560239 | 1,587084842 | 1,243382311 | 1,166678612 |
| <i>Siglec15</i>      | 2,534479846 | 1,736675817 | 1,711053745 | 1,082321301 | 1,16196004  |
| <i>Tube1</i>         | 2,54212411  | 1,714166139 | 1,753879001 | 1,393221448 | 1,108669281 |
| <i>2310001H17Rik</i> | 2,358385341 | 1,664684861 | 1,945574646 | 1,439934606 | 0,846461556 |
| <i>Rag2</i>          | 3,089920774 | 1,993846417 | 1,620453315 | 1,20588105  | 0,908600286 |
| <i>A930003A15Rik</i> | 2,665726309 | 1,891212248 | 1,656946365 | 1,102763247 | 0,99248126  |
| <i>Gm525</i>         | 2,93411844  | 2,040068687 | 2,103376859 | 1,530459044 | 1,510377968 |
| <i>Ly6g6d</i>        | 3,372802614 | 2,020774041 | 2,119083858 | 1,502918023 | 1,684041    |
| <i>Rorc</i>          | 3,042652913 | 2,159606795 | 2,082195625 | 1,300186969 | 1,475609897 |
| <i>Ndn12</i>         | 3,035099208 | 2,02010082  | 1,807747577 | 1,346834996 | 1,843577142 |
| <i>Sema7a</i>        | 2,850666803 | 2,008226947 | 1,884983593 | 1,490770579 | 1,545440407 |
| <i>Plxnd1</i>        | 2,819794874 | 2,161196744 | 1,907358142 | 1,486519275 | 1,509467662 |
| <i>Fabp4</i>         | 2,964186895 | 2,182603702 | 1,897498489 | 1,630925409 | 1,620313548 |
| <i>Tubb2b</i>        | 2,910045729 | 2,260654873 | 1,836824922 | 1,4477532   | 1,368817808 |
| <i>Kifc2</i>         | 2,965406257 | 2,140150683 | 1,675246561 | 1,535233119 | 1,46238305  |
| <i>BB031773</i>      | 2,841684903 | 2,278950619 | 2,24796409  | 1,453011151 | 1,79168496  |
| <i>3930402G23Rik</i> | 2,927051981 | 2,21367333  | 2,236197669 | 1,566429388 | 1,592937671 |
| <i>Rag1</i>          | 3,515045957 | 2,497297323 | 2,293405065 | 1,36736396  | 1,561681036 |
| <i>Ldhb</i>          | 2,60265702  | 2,030829826 | 1,930348089 | 1,460310692 | 1,578047205 |
| <i>Slc37a2</i>       | 2,563487894 | 1,995003998 | 1,912607585 | 1,434748023 | 1,505287644 |
| <i>Rapgef3</i>       | 2,591507949 | 2,056459682 | 2,003188104 | 1,514386528 | 1,593434581 |
| <i>9230115E21Rik</i> | 2,292451142 | 1,973305267 | 2,050784177 | 1,270023781 | 1,538077691 |
| <i>Ly6d</i>          | 2,552487552 | 2,276017246 | 2,280439828 | 1,356496311 | 1,64637732  |
| <i>Ilvbl</i>         | 2,736147005 | 1,963494151 | 2,145439459 | 1,447094306 | 1,735954523 |
| <i>Maz</i>           | 2,658540605 | 1,882076378 | 2,097884457 | 1,470818517 | 1,788059156 |
| <i>Slc6a19</i>       | 2,617527776 | 1,932535379 | 2,050775488 | 1,189423097 | 1,861260128 |
| <i>Trim72</i>        | 2,756120755 | 1,783175457 | 1,928977208 | 1,187754967 | 1,607876424 |
| <i>Ccdc153</i>       | 2,770929875 | 1,92897004  | 1,968935576 | 1,247625276 | 1,510882737 |
| <i>Gm16617</i>       | 2,730182107 | 1,588193679 | 1,867075775 | 1,632904298 | 1,469668663 |
| <i>Myadml2</i>       | 2,689739661 | 1,841820249 | 1,948520074 | 1,531668681 | 1,42097075  |
| <i>C2cd4d</i>        | 2,958998039 | 1,67471364  | 2,185288821 | 1,477815487 | 1,417055507 |
| <i>2210020M01Rik</i> | 2,956021136 | 1,685108535 | 1,730213596 | 1,055095961 | 1,624230292 |
| <i>4930572J05Rik</i> | 3,116974574 | 1,86890731  | 1,410292126 | 1,723960711 | 1,760677989 |
| <i>5430425J12Rik</i> | 2,649912503 | 1,985655736 | 2,325132415 | 1,454248556 | 2,27011258  |
| <i>Grb7</i>          | 2,493539515 | 1,953286041 | 2,373766058 | 1,690177702 | 2,231507107 |

|                      |             |             |             |             |             |
|----------------------|-------------|-------------|-------------|-------------|-------------|
| <i>Cerk</i>          | 2,570866631 | 2,114547036 | 2,106288816 | 1,606533975 | 1,949514516 |
| <i>Pigyl</i>         | 2,444524685 | 2,114569755 | 2,240263072 | 1,573885074 | 2,011695271 |
| <i>Ptpn14</i>        | 2,535054711 | 1,987481085 | 2,29408437  | 1,502543411 | 1,924275167 |
| <i>8430423G03Rik</i> | 2,659130116 | 1,761939241 | 2,478942784 | 1,335393792 | 1,941612852 |
| <i>4933433G15Rik</i> | 2,31059464  | 2,100594569 | 2,164254811 | 1,235573925 | 2,036872113 |
| <i>Dhx34</i>         | 2,321189545 | 1,828765548 | 1,971488501 | 1,250264835 | 1,941926835 |
| <i>Gm12</i>          | 2,020444726 | 1,65735698  | 2,309923164 | 1,192974446 | 2,051544523 |
| <i>Gm7030</i>        | 2,163705912 | 1,95657292  | 2,535363242 | 1,315110062 | 2,095203993 |
| <i>Pak4</i>          | 1,886060786 | 1,726658562 | 2,313439923 | 1,690335865 | 2,237254031 |
| <i>Hpcal1</i>        | 2,01537447  | 1,744760226 | 2,175312923 | 1,682885868 | 2,276813354 |
| <i>Ly6e</i>          | 2,008101709 | 1,829872577 | 2,220505339 | 1,744030109 | 2,087506793 |
| <i>2700081O15Rik</i> | 2,120316926 | 1,829598109 | 2,193804412 | 1,538933235 | 2,192488667 |
| <i>Rps15</i>         | 2,152077713 | 1,786909063 | 2,092519588 | 1,63072256  | 1,977155249 |
| <i>Slamf6</i>        | 2,081119505 | 1,887191836 | 2,031932342 | 1,693742587 | 1,914736067 |
| <i>Rmnd5a</i>        | 2,104683083 | 1,880865456 | 2,101618685 | 1,504730907 | 1,985436414 |
| <i>Edem1</i>         | 2,310015838 | 1,962037481 | 2,215142268 | 1,661354818 | 1,785112007 |
| <i>Egln3</i>         | 2,190870312 | 1,974105291 | 2,056351176 | 1,642795687 | 1,715996974 |
| <i>Tmem123</i>       | 2,1499104   | 1,963020986 | 1,948788309 | 1,74976932  | 1,96589926  |
| <i>5830428M24Rik</i> | 2,159426857 | 1,963929167 | 1,98021081  | 1,756917461 | 2,089293799 |
| <i>Stat5a</i>        | 2,153949276 | 2,006777151 | 2,035967681 | 1,691184516 | 1,990460853 |
| <i>Tcof1</i>         | 2,207282384 | 1,988859751 | 2,050390741 | 1,672852046 | 1,986691541 |
| <i>Bcl2l11</i>       | 2,23024634  | 1,933201296 | 2,043494371 | 1,643244958 | 2,019434338 |
| <i>Samd1</i>         | 2,262281888 | 2,015729943 | 1,940391083 | 1,791381145 | 1,964340081 |
| <i>Lta</i>           | 2,218266386 | 1,785986308 | 1,949391122 | 1,592017348 | 2,075296839 |
| <i>D030028A08Rik</i> | 2,301457242 | 1,863557149 | 1,88117934  | 1,675904842 | 2,066398915 |
| <i>G630016D24Rik</i> | 2,493363879 | 1,91448382  | 1,985830671 | 1,809589483 | 1,763259892 |
| <i>5830416P10Rik</i> | 2,381255529 | 1,988406273 | 1,988895555 | 1,721428483 | 1,632248783 |
| <i>Gm11186</i>       | 2,485658656 | 1,711935893 | 2,025625381 | 1,677286107 | 1,702710756 |
| <i>3110062M04Rik</i> | 2,345330285 | 1,866823892 | 1,965579399 | 1,440325416 | 1,790156871 |
| <i>Tm6sf1</i>        | 2,349449639 | 1,942875419 | 1,981000056 | 1,435966114 | 1,8758663   |
| <i>Unc5cl</i>        | 2,343065399 | 1,880380393 | 1,846031385 | 1,47092139  | 1,721639787 |
| <i>E2f4</i>          | 2,438296165 | 1,899763319 | 1,834196674 | 1,649617374 | 1,914145544 |
| <i>Zdhhc8</i>        | 2,352503473 | 1,58351041  | 1,804972427 | 1,422555332 | 1,993058152 |
| <i>Map3k6</i>        | 2,417783442 | 1,698213541 | 1,955014576 | 1,432622835 | 1,927939267 |
| <i>Alox5ap</i>       | 2,097487492 | 1,700090694 | 1,929006091 | 1,547723433 | 1,942387748 |
| <i>Nup214</i>        | 2,056758576 | 1,58919177  | 1,867676958 | 1,543784212 | 1,867939811 |
| <i>Arl5c</i>         | 2,085278449 | 1,636748336 | 2,025559952 | 1,461057979 | 1,853153999 |
| <i>Slc1a5</i>        | 2,346336286 | 1,750254245 | 2,136517803 | 1,610418188 | 1,924235899 |
| <i>Pafah1b3</i>      | 2,242011367 | 1,610389562 | 2,160344642 | 1,484502427 | 1,938789612 |
| <i>Galnt4</i>        | 1,864117946 | 1,937847421 | 1,656547478 | 1,855254931 | 1,994790012 |
| <i>Tbcc</i>          | 1,828432487 | 2,064492003 | 1,491882787 | 1,832080555 | 2,131502429 |
| <i>H2-T22</i>        | 2,137893287 | 1,998928152 | 1,736493801 | 1,794686633 | 2,276659594 |
| <i>H2-T9</i>         | 2,137900006 | 2,003467311 | 1,736501661 | 1,794692629 | 2,276662093 |
| <i>Nudt22</i>        | 2,24026529  | 1,904027921 | 1,41946601  | 2,164464141 | 2,16054117  |
| <i>Map1lc3a</i>      | 2,673214361 | 2,286984788 | 1,577209816 | 1,299167526 | 2,349957387 |
| <i>E130112N10Rik</i> | 2,416658017 | 2,459459826 | 1,922839134 | 1,90231271  | 1,888495751 |
| <i>Tpi1</i>          | 2,545468766 | 2,533506595 | 2,262308681 | 1,879258543 | 1,979888138 |
| <i>Cd27</i>          | 2,409917619 | 2,630300198 | 1,853980381 | 2,164199961 | 1,668094122 |
| <i>Gm20098</i>       | 2,095096799 | 2,100697603 | 2,120036952 | 1,873364285 | 1,899090743 |
| <i>Lrig1</i>         | 2,134157095 | 2,153222841 | 2,064580864 | 1,897061546 | 1,915862585 |
| <i>4930426L09Rik</i> | 2,172918281 | 2,315247145 | 2,025876144 | 1,817662145 | 1,936197569 |

|                      |             |             |              |             |              |
|----------------------|-------------|-------------|--------------|-------------|--------------|
| <i>Cstb</i>          | 2,140635421 | 2,127714022 | 2,019557763  | 1,701047396 | 1,853953944  |
| <i>Nmnat1</i>        | 2,128296107 | 2,051202107 | 1,862262527  | 1,690220473 | 1,790542302  |
| <i>Trib1</i>         | 1,953567215 | 2,175510879 | 2,058901926  | 1,800399148 | 1,736922336  |
| <i>Parp11</i>        | 2,017207456 | 2,159999711 | 1,99378326   | 2,032790854 | 1,69920201   |
| <i>Lig4</i>          | 2,308840786 | 2,177334414 | 1,975875116  | 1,9127006   | 1,586875175  |
| <i>Pvr</i>           | 2,385623543 | 2,178412367 | 1,994154228  | 1,957767634 | 1,57616982   |
| <i>4930578M01Rik</i> | 2,529170542 | 2,140203787 | 2,090601937  | 1,881192666 | 1,711346194  |
| <i>Rasgrp4</i>       | 2,281149495 | 2,21424005  | 1,97642822   | 1,690741397 | 1,491881195  |
| <i>Pex26</i>         | 2,770887899 | 2,211014536 | 2,09373581   | 1,746051148 | 1,672272639  |
| <i>Phospho1</i>      | 2,619482042 | 2,110104052 | 2,137837094  | 1,633188545 | 1,747490916  |
| <i>Gphb5</i>         | 2,687925002 | 2,166599277 | 2,068034796  | 1,683427028 | 1,898381891  |
| <i>Mtch1</i>         | 2,820262421 | 2,173113465 | 2,06103803   | 1,709364823 | 1,980346242  |
| <i>Phf2</i>          | 2,629868811 | 2,098028627 | 2,138317375  | 1,786258461 | 1,985768803  |
| <i>Kremen1</i>       | 2,553310778 | 2,127856382 | 2,142495935  | 1,770417223 | 1,921315595  |
| <i>Gm3716</i>        | 2,540628944 | 2,060374473 | 2,124364594  | 1,851729114 | 1,885051117  |
| <i>Gm11202</i>       | 2,612785668 | 2,061249087 | 2,12561892   | 1,859665174 | 1,914173363  |
| <i>Mns1</i>          | 2,468529464 | 2,203698291 | 2,095730522  | 1,738894868 | 1,893027554  |
| <i>1700067K01Rik</i> | 2,560032724 | 2,114750245 | 2,074211105  | 1,997546625 | 1,977586459  |
| <i>Gm11944</i>       | 2,511884326 | 2,096098472 | 2,042451334  | 1,882928    | 2,045621739  |
| <i>Elmo3</i>         | 2,620631314 | 2,197539659 | 1,775651024  | 1,933175602 | 1,856973974  |
| <i>Polr2i</i>        | 2,769688725 | 2,030540463 | 1,870371116  | 1,890767057 | 2,109971739  |
| <i>Tff1</i>          | 2,578200593 | 2,67980022  | 0            | 1,909667548 | 1,450612726  |
| <i>Gm5465</i>        | 1,881481397 | 1,812086005 | -0,514909308 | 0,986995558 | 2,12689386   |
| <i>Cd3d</i>          | 3,72135033  | 2,642718544 | 1,951635148  | 0,656964594 | 0,314294074  |
| <i>Btg1</i>          | 3,215643525 | 2,234259387 | 2,092118202  | 0,458300489 | -0,021090027 |
| <i>Cdkn2d</i>        | 2,835469372 | 2,820707939 | 2,264722573  | 0           | -2,694207149 |
| <i>Gpsm3</i>         | 2,308319959 | 2,239473676 | 1,767791681  | 0,386357514 | 1,005898572  |
| <i>H2afz</i>         | 2,459056487 | 2,293923259 | 1,480779803  | 0,452891761 | 0,929935406  |
| <i>Actb</i>          | 2,837810082 | 3,220978288 | 2,64679654   | 1,009600412 | 1,179903441  |
| <i>Cd52</i>          | 3,463529043 | 3,392233292 | 2,605542489  | 0,990403816 | 1,02321214   |

| Cluster 2                           |             |             |             |             |             |  |
|-------------------------------------|-------------|-------------|-------------|-------------|-------------|--|
| Intragenic 5hmC (log2 CMS-IP/Input) |             |             |             |             |             |  |
| Gene symbol                         | DP          | CD4 SP      | CD8 SP      | naïve CD4   | naïve CD8   |  |
| <i>Gtf2h4</i>                       | 3,829571294 | 2,851240615 | 2,822252996 | 2,286366543 | 1,827723371 |  |
| <i>Txnip</i>                        | 3,298296734 | 3,203653401 | 2,686880799 | 2,254881797 | 1,745139052 |  |
| <i>Gm4598</i>                       | 3,266397735 | 2,991067754 | 2,461198904 | 2,052332234 | 1,836883807 |  |
| <i>A430035B10Rik</i>                | 3,211383573 | 2,635951067 | 2,44144637  | 2,114946479 | 2,0914574   |  |
| <i>Aqp11</i>                        | 3,633877947 | 2,630444408 | 2,514115627 | 2,035985212 | 1,896292515 |  |
| <i>Ptms</i>                         | 3,220501332 | 2,734389709 | 2,379630917 | 2,342140575 | 2,105984762 |  |
| <i>Cd4</i>                          | 3,050275063 | 3,008059734 | 2,40191443  | 2,629047565 | 1,939358881 |  |
| <i>S100a2</i>                       | 2,965693147 | 2,736338541 | 2,272087192 | 2,388890075 | 1,617906423 |  |
| <i>Cd8b1</i>                        | 4,364706804 | 3,514429575 | 3,13019994  | 2,654437876 | 1,843696882 |  |
| <i>Sit1</i>                         | 3,692860291 | 3,277629592 | 3,117956223 | 1,89398216  | 2,656884992 |  |
| <i>Rnf167</i>                       | 2,763127685 | 3,383393592 | 3,550011069 | 1,962229534 | 2,472304475 |  |
| <i>Zfp36</i>                        | 3,248085857 | 3,622464646 | 3,100760605 | 1,457518866 | 2,257213344 |  |
| <i>Art1</i>                         | 3,237222125 | 2,40444203  | 2,322106399 | 1,843248505 | 1,784687272 |  |
| <i>Zfp219</i>                       | 3,002735245 | 2,280283308 | 2,319740529 | 1,99057874  | 1,881358171 |  |
| <i>Neu3</i>                         | 2,858373773 | 2,280255111 | 2,203863477 | 1,817996376 | 1,859886223 |  |
| <i>Bcl2l1</i>                       | 2,927430716 | 2,336021713 | 2,284814751 | 1,858324019 | 1,988702121 |  |
| <i>Xrcc6</i>                        | 3,347993928 | 2,352893909 | 2,125597944 | 1,669090919 | 1,819316991 |  |

|                      |             |             |             |             |             |
|----------------------|-------------|-------------|-------------|-------------|-------------|
| <i>Fbxl12</i>        | 3,125367125 | 2,239164291 | 2,185233191 | 1,662928777 | 1,782933866 |
| <i>Endou</i>         | 3,065379256 | 2,302615375 | 2,080573592 | 1,785438434 | 1,676725881 |
| <i>Colq</i>          | 2,980444198 | 2,420354996 | 2,44143585  | 1,757176697 | 2,011049117 |
| <i>Arsi</i>          | 3,396749953 | 2,573477887 | 2,418439841 | 1,626900921 | 1,863777133 |
| <i>Naif1</i>         | 2,748450379 | 2,166050818 | 2,158311752 | 1,89437121  | 1,997295905 |
| <i>Kcnh3</i>         | 2,805519691 | 2,146615988 | 2,254896503 | 1,845000671 | 2,00219835  |
| <i>Gfi1</i>          | 2,848039024 | 2,126203389 | 2,295715127 | 1,935453406 | 2,155199305 |
| <i>Lgals1</i>        | 2,749154451 | 2,211973708 | 2,47798525  | 1,810740199 | 1,990538798 |
| <i>Eif4e3</i>        | 2,773315046 | 2,289877232 | 2,236746485 | 1,920955999 | 1,912435243 |
| <i>Dhrs13</i>        | 2,725548955 | 2,297484596 | 2,25369808  | 2,054772739 | 1,918723969 |
| <i>Ostm1</i>         | 2,922062237 | 2,376171461 | 2,224822554 | 1,974041132 | 2,136520502 |
| <i>Ptrh1</i>         | 3,056089308 | 2,075145733 | 2,336443555 | 2,059254894 | 1,80776066  |
| <i>1700019L03Rik</i> | 3,069269175 | 2,061115159 | 2,117800775 | 1,857502998 | 1,854544168 |
| <i>9130221H12Rik</i> | 2,86209698  | 2,07535738  | 2,224428524 | 1,523307419 | 2,462836276 |
| <i>Syde1</i>         | 3,020586309 | 2,071009482 | 2,315919951 | 1,799141492 | 2,354655565 |
| <i>Rab42-ps</i>      | 2,690887355 | 2,418939175 | 2,429913723 | 1,745574913 | 2,27324283  |
| <i>Olf314</i>        | 2,882297979 | 2,384212724 | 2,575465098 | 1,513092552 | 2,230795181 |
| <i>Ict1</i>          | 2,735916982 | 2,212425424 | 2,581430688 | 2,153891332 | 2,737282257 |
| <i>Trp53i11</i>      | 3,10702197  | 2,198296706 | 2,752831576 | 2,136998161 | 2,704037624 |
| <i>Slc43a2</i>       | 2,895169987 | 2,236245237 | 2,493382968 | 1,902805706 | 2,499625131 |
| <i>Cxcr4</i>         | 2,785525186 | 2,132874584 | 2,524868073 | 1,873860804 | 2,48183848  |
| <i>Pptc7</i>         | 2,98486625  | 2,511736154 | 2,559015693 | 2,294528152 | 2,46045344  |
| <i>0610005C13Rik</i> | 3,249487231 | 2,426762026 | 2,419485647 | 2,349379504 | 2,432694542 |
| <i>E330033B04Rik</i> | 2,874974428 | 2,576524686 | 2,439135633 | 2,453574277 | 2,477623296 |
| <i>Myl6</i>          | 2,882310882 | 2,461339971 | 2,467835301 | 2,463039988 | 2,59515503  |
| <i>Prrt2</i>         | 2,89143757  | 2,365406109 | 2,425712588 | 2,295280629 | 2,305016158 |
| <i>Dcdc2b</i>        | 3,63327439  | 2,62486521  | 2,402399953 | 2,203028392 | 2,371714969 |
| <i>Lgals7</i>        | 3,405445385 | 2,742203017 | 2,465411029 | 2,268046133 | 2,426512969 |
| <i>Gm10818</i>       | 2,881587147 | 2,726208401 | 2,448190839 | 2,313051146 | 2,58135475  |
| <i>Paqr6</i>         | 3,332755863 | 2,63228541  | 2,751844735 | 2,042355823 | 2,510721945 |
| <i>5031434O11Rik</i> | 2,637939928 | 2,505915804 | 2,716846493 | 2,01178109  | 2,392462993 |
| <i>Snai1</i>         | 2,869874623 | 2,421385366 | 2,718240954 | 2,006953149 | 2,029077636 |
| <i>Fkbp2</i>         | 3,287091443 | 2,411641119 | 2,689217399 | 2,16256696  | 2,014352271 |
| <i>2310007L24Rik</i> | 3,388163414 | 2,538805632 | 2,803976976 | 1,966628994 | 2,203124987 |
| <i>Gm15441</i>       | 2,997811263 | 2,969492429 | 2,747572138 | 2,39172616  | 2,619504886 |
| <i>Arc</i>           | 3,015785376 | 2,831577719 | 2,757655207 | 2,354029685 | 2,571596964 |
| <i>Fam71b</i>        | 3,315806213 | 2,886593005 | 2,63436328  | 2,168875989 | 2,670091076 |
| <i>4930568K20Rik</i> | 3,477362416 | 2,719256706 | 2,83927572  | 2,257643305 | 2,600502798 |
| <i>Ccdc42b</i>       | 3,30400165  | 2,745361428 | 2,74078715  | 2,246197217 | 2,526157938 |
| <i>Abi3</i>          | 3,177661322 | 2,882829353 | 2,921424124 | 2,150554909 | 2,531763232 |
| <i>Gimap7</i>        | 2,815767026 | 2,764690566 | 2,801801487 | 2,396824918 | 2,465770185 |
| <i>Tnfrsf1a</i>      | 2,792540665 | 2,701159114 | 2,780059094 | 2,31402439  | 2,643545086 |
| <i>Tcf7</i>          | 3,528738174 | 3,055256698 | 3,094090435 | 2,432372116 | 2,603146581 |
| <i>Aes</i>           | 3,511596696 | 2,991439855 | 2,985796276 | 2,537931994 | 2,679864657 |
| <i>Cyb5</i>          | 3,03664976  | 2,849254883 | 2,967005053 | 2,55196824  | 2,691003628 |
| <i>A630055G03Rik</i> | 3,387555076 | 2,865206605 | 2,967052116 | 2,543919944 | 2,620430504 |
| <i>Rnf166</i>        | 3,931308874 | 2,879337862 | 2,914027936 | 2,513113149 | 2,43479798  |
| <i>B3gnt8</i>        | 3,42115395  | 2,737132509 | 2,766169544 | 2,350395383 | 2,364596501 |
| <i>Ets2</i>          | 3,167695877 | 2,725939002 | 2,645466311 | 2,347864253 | 2,332601079 |
| <i>1190002H23Rik</i> | 3,271638936 | 2,855062913 | 2,767187318 | 2,335133842 | 2,400581244 |
| <i>2210021J22Rik</i> | 3,35132197  | 2,831727077 | 2,702369389 | 2,288382559 | 2,427409262 |

|                      |             |             |             |             |             |
|----------------------|-------------|-------------|-------------|-------------|-------------|
| <i>Nron</i>          | 3,610330761 | 2,840617232 | 2,640274641 | 2,256451019 | 2,223595459 |
| <i>A630019I02Rik</i> | 2,803675958 | 3,007172487 | 2,775758348 | 2,48522714  | 2,185040883 |
| <i>Cd2</i>           | 3,285874656 | 3,606246402 | 3,566430945 | 2,426654807 | 2,895431537 |
| <i>Leprel4</i>       | 3,914920572 | 3,175761077 | 3,073753638 | 2,378448464 | 3,022233791 |
| <i>Gm10560</i>       | 3,020647145 | 3,255669679 | 3,285656435 | 2,250224342 | 3,271437375 |
| <i>Ets1</i>          | 3,171474143 | 3,297459216 | 3,163577247 | 2,275174346 | 2,72359941  |
| <i>Rab3a</i>         | 2,822566127 | 2,925600857 | 2,628942726 | 2,253205646 | 2,95747805  |
| <i>D830046C22Rik</i> | 2,497589278 | 3,227930681 | 3,150441612 | 2,095739341 | 3,138666357 |
| <i>Ccr7</i>          | 2,609909886 | 3,786086608 | 3,65646356  | 2,396503143 | 2,992800323 |
| <i>Ccnd3</i>         | 2,961188871 | 2,595098952 | 2,74067129  | 2,68735605  | 2,739643272 |
| <i>Btg2</i>          | 3,108346384 | 2,854616671 | 2,694439726 | 2,616029626 | 2,579912871 |
| <i>Kctd2</i>         | 3,845960009 | 2,831125874 | 2,793328252 | 2,507690869 | 2,836812778 |
| <i>Tspyl4</i>        | 3,009420767 | 2,842303623 | 2,764263731 | 2,560718913 | 2,799992734 |
| <i>Cldn4</i>         | 4,291652473 | 2,894035872 | 2,580714355 | 2,605079524 | 2,898713765 |
| <i>Pik3ip1</i>       | 3,013962956 | 2,920824043 | 2,922457644 | 2,556304319 | 2,803056929 |
| <i>Fxyd5</i>         | 2,904855935 | 2,923148541 | 2,923267433 | 2,650256802 | 2,809271936 |
| <i>Rasl11b</i>       | 3,080118758 | 2,893025152 | 3,078662999 | 2,627951892 | 2,896799012 |
| <i>Bach1</i>         | 3,477099475 | 3,121540433 | 3,136720374 | 2,718842677 | 2,904360277 |
| <i>Zfp408</i>        | 3,640883796 | 3,271750667 | 3,243531745 | 2,736369907 | 3,233022116 |
| <i>Fam189b</i>       | 3,056928833 | 2,717820946 | 2,97150393  | 2,911997643 | 2,851036339 |
| <i>Adat3</i>         | 2,922483747 | 2,701537106 | 2,933307259 | 2,889470822 | 3,303755273 |
| <i>Cnp</i>           | 3,310799845 | 2,805570037 | 3,297203467 | 3,145337974 | 3,479403942 |
| <i>Nt5c</i>          | 2,785691112 | 2,698349102 | 3,410411167 | 3,100673809 | 3,290927065 |
| <i>A1467606</i>      | 3,213129284 | 3,086750411 | 3,282096326 | 2,920159441 | 2,776255371 |
| <i>Rhoh</i>          | 2,893263662 | 3,363866152 | 3,320744134 | 2,843583004 | 2,838563373 |
| <i>Ldhd</i>          | 3,687604715 | 3,21744448  | 2,84397557  | 2,915964002 | 2,826669384 |
| <i>Kcnn4</i>         | 3,049232059 | 3,156884846 | 3,052418599 | 2,863410635 | 2,916266213 |
| <i>Nfkbia</i>        | 3,411457419 | 3,888200604 | 3,727805507 | 2,859291894 | 3,213071424 |
| <i>4930478L05Rik</i> | 3,773210543 | 3,405201059 | 3,267536907 | 2,920374039 | 3,313845922 |
| <i>Gm4814</i>        | 3,708431539 | 3,738442567 | 3,657609664 | 2,927721689 | 2,97597483  |
| <i>Psmb8</i>         | 3,079054522 | 3,119852681 | 2,94196845  | 2,920749173 | 3,08182695  |
| <i>Fam78a</i>        | 3,363679218 | 3,729696542 | 3,926680521 | 3,591466543 | 2,915189822 |
| <i>Olfr1509</i>      | 3,378502243 | 3,098471655 | 3,455199565 | 3,209990629 | 2,959368144 |
| <i>Zbtb12</i>        | 3,744921815 | 3,944718465 | 4,019980684 | 3,706504026 | 3,689297691 |
| <i>Gimap1</i>        | 3,106484897 | 3,201494066 | 3,150093331 | 3,113218996 | 3,415324542 |
| <i>Hmha1</i>         | 3,053686182 | 3,61493313  | 3,760698886 | 3,518670677 | 3,876278251 |
| <i>Bcl11b</i>        | 3,703996995 | 4,079250686 | 4,179232103 | 3,622664356 | 3,810242936 |
| <i>Sept1</i>         | 3,484228858 | 3,404406679 | 3,383582853 | 3,004958961 | 3,176701395 |
| <i>Gm590</i>         | 4,399676598 | 4,335665836 | 4,214502389 | 4,397793542 | 4,279187641 |
| <i>Hsdl1</i>         | 4,27194872  | 3,63485913  | 3,466603029 | 3,115984594 | 3,141608663 |
| <i>Als2cl</i>        | 3,128320285 | 3,199933748 | 3,427062266 | 3,129837627 | 3,372924051 |
| <i>Gm13031</i>       | 3,366664157 | 3,160769031 | 3,249069727 | 3,189986194 | 3,127736245 |
| <i>G0s2</i>          | 3,347031763 | 4,083509164 | 4,348524341 | 4,476509359 | 3,940258791 |
| <i>Vamp1</i>         | 3,673590436 | 3,48029811  | 3,492674877 | 2,996282796 | 3,135428382 |
| <i>Ezr</i>           | 3,023561033 | 3,086311025 | 3,308675243 | 2,980239759 | 3,331535431 |
| <i>Cd247</i>         | 2,863335249 | 3,331368593 | 3,288767686 | 2,901177332 | 3,120965412 |
| <i>Satb1</i>         | 2,879602716 | 3,618363718 | 3,68665909  | 3,287939422 | 3,381673973 |
| <i>Cd8a</i>          | 5,155248197 | 4,049708407 | 3,578299799 | 3,197742908 | 2,50159727  |
| <i>2210010C17Rik</i> | 3,642199568 | 3,331356647 | 3,00010396  | 2,816402068 | 2,613824575 |
| <i>Gm13032</i>       | 2,969486258 | 3,107021747 | 2,627220448 | 3,217917982 | 2,42248588  |
| <i>H2-Oa</i>         | 2,581936406 | 2,464487691 | 3,016423548 | 2,427545121 | 2,980973168 |

|                      |             |             |             |             |             |
|----------------------|-------------|-------------|-------------|-------------|-------------|
| <i>A430088P11Rik</i> | 2,594862812 | 2,484347132 | 2,929083084 | 2,660980751 | 3,38128895  |
| <i>Prex1</i>         | 2,504287767 | 2,514618844 | 2,751399425 | 2,508248771 | 2,899829355 |
| <i>Sema4d</i>        | 2,448329953 | 2,477366744 | 2,859264952 | 2,602392772 | 2,919837061 |
| <i>Ppp1ca</i>        | 2,800427285 | 2,460429207 | 3,052911506 | 2,791914672 | 2,926304569 |
| <i>Il4ra</i>         | 2,760510699 | 2,583939706 | 2,552873115 | 2,607669157 | 2,803931045 |
| <i>Slc25a1</i>       | 2,671537829 | 2,653189581 | 2,502968217 | 2,567016689 | 3,153858635 |
| <i>4930583K01Rik</i> | 2,783169735 | 2,561631579 | 2,703556567 | 2,690433965 | 3,338688607 |
| <i>N4bp3</i>         | 3,21545865  | 2,457873787 | 2,707186907 | 2,11229787  | 2,77196493  |
| <i>Slc50a1</i>       | 2,98864926  | 2,534192532 | 2,842582194 | 2,264947017 | 2,847265273 |
| <i>Esrp2</i>         | 3,221675102 | 2,384834972 | 2,635024253 | 2,295483068 | 3,036995593 |
| <i>Adrbk1</i>        | 2,823417299 | 2,451685816 | 2,669970264 | 2,449646041 | 2,787362405 |
| <i>E2f2</i>          | 2,748594679 | 2,387198734 | 2,732655867 | 2,453372017 | 2,886196451 |
| <i>Pnma1</i>         | 2,801064524 | 2,188426853 | 2,803406995 | 2,421661714 | 2,745677827 |
| <i>Tlr12</i>         | 2,878289135 | 2,553603381 | 3,106594367 | 2,367117167 | 2,988391939 |
| <i>Gse1</i>          | 3,011061371 | 2,677074862 | 2,920175528 | 2,402061551 | 2,758157427 |
| <i>Taf10</i>         | 2,713079983 | 2,649293699 | 2,824878748 | 2,373220879 | 2,763084966 |
| <i>Ikzf3</i>         | 2,623243181 | 2,586293905 | 2,893403306 | 2,38024368  | 2,779935093 |
| <i>Slc48a1</i>       | 2,653280628 | 2,652902127 | 2,910929241 | 2,169380631 | 2,825984938 |
| <i>Zmynd10</i>       | 2,575328523 | 2,241808502 | 2,31394081  | 2,580394118 | 2,784112667 |
| <i>Klf3</i>          | 2,603089796 | 2,265863358 | 2,546346491 | 2,562209469 | 3,237792937 |
| <i>Fam89b</i>        | 2,569247087 | 2,339070179 | 2,565532489 | 2,584658056 | 2,688878197 |
| <i>AI413582</i>      | 2,687618483 | 2,170662453 | 2,633687578 | 2,499614123 | 2,648681809 |
| <i>Orai2</i>         | 2,407731361 | 2,069179109 | 2,566979725 | 2,457033631 | 3,011162503 |
| <i>Rbm15b</i>        | 2,555147402 | 1,973517718 | 2,645803221 | 2,444642316 | 3,006856011 |
| <i>Emp3</i>          | 2,958628534 | 2,181516335 | 2,549679595 | 2,659832986 | 2,62281332  |
| <i>Pip5k1c</i>       | 2,473025146 | 2,365210739 | 2,419596099 | 2,314794833 | 2,575157273 |
| <i>Bysl</i>          | 2,481868537 | 2,406107347 | 2,333561265 | 2,234516479 | 2,519375958 |
| <i>1700097N02Rik</i> | 2,542460337 | 2,538885682 | 2,411015116 | 2,271778012 | 2,682893149 |
| <i>Hps6</i>          | 2,457497548 | 2,361451357 | 2,305707089 | 2,401928726 | 2,696320141 |
| <i>Trim8</i>         | 2,416170533 | 2,328171404 | 2,521305523 | 2,300072426 | 2,725521477 |
| <i>Zc3h12a</i>       | 2,410347209 | 2,282227268 | 2,540185725 | 2,418492744 | 2,710012385 |
| <i>Gigyf1</i>        | 2,560450695 | 2,402919241 | 2,583327756 | 2,295303856 | 2,791985836 |
| <i>Igtp</i>          | 2,333063103 | 2,571355273 | 2,513885402 | 2,239690848 | 2,355566046 |
| <i>Pycr2</i>         | 2,390176454 | 2,323876171 | 2,48646963  | 2,358367917 | 2,373028029 |
| <i>Plscr3</i>        | 2,282648483 | 2,516340478 | 2,480899081 | 2,434929932 | 2,526060986 |
| <i>Egln2</i>         | 2,204865717 | 2,503345946 | 2,647333766 | 2,507719725 | 2,469185938 |
| <i>Uck2</i>          | 2,32928204  | 2,399036949 | 2,670015369 | 2,344205739 | 2,568743421 |
| <i>Ypel3</i>         | 2,531915549 | 2,622437977 | 2,714511121 | 2,3176513   | 2,500835285 |
| <i>Kdm6b</i>         | 2,40133504  | 2,586636993 | 2,696628109 | 2,31727711  | 2,562251995 |
| <i>Gm15880</i>       | 2,480476442 | 2,575300423 | 2,615917606 | 2,43727581  | 2,559601757 |
| <i>Pxn</i>           | 2,442756597 | 2,510645684 | 2,61664772  | 2,365046614 | 2,61383541  |
| <i>Nsmce1</i>        | 2,549519915 | 2,685706352 | 2,690487365 | 2,482659037 | 2,646745747 |
| <i>Rem2</i>          | 2,577105782 | 2,725526677 | 2,629375368 | 2,369342513 | 2,683403985 |
| <i>Glb1</i>          | 2,353030944 | 2,670753331 | 2,561791798 | 2,414712981 | 2,429936164 |
| <i>Nrip1</i>         | 2,32304414  | 2,720877225 | 2,68147524  | 2,501383423 | 2,386441345 |
| <i>Tnk2</i>          | 2,298001885 | 2,662941316 | 2,725782847 | 2,364909335 | 2,630478469 |
| <i>Aif1</i>          | 2,285000833 | 2,558282764 | 2,947682744 | 2,293923863 | 2,620793606 |
| <i>Fam105a</i>       | 2,319044571 | 2,542306192 | 2,735267707 | 2,589223751 | 2,881085583 |
| <i>Akna</i>          | 2,304328674 | 2,529004942 | 2,766136108 | 2,65168419  | 2,872779623 |
| <i>Def6</i>          | 2,332086332 | 2,623229561 | 2,766533468 | 2,645102418 | 2,836010729 |
| <i>Grk6</i>          | 2,246007676 | 2,540878338 | 2,652644239 | 2,589728917 | 2,91498578  |



|                      |             |             |             |             |             |
|----------------------|-------------|-------------|-------------|-------------|-------------|
| <i>Ldlrap1</i>       | 2,395882138 | 2,39324298  | 2,697283534 | 2,734937689 | 3,108551498 |
| <i>Rnf113a2</i>      | 2,293188279 | 2,558097317 | 2,725090091 | 2,404374304 | 3,251657675 |
| <i>Il17c</i>         | 2,363333651 | 2,517408961 | 2,862092107 | 2,395726218 | 3,419973274 |
| <i>4930404N11Rik</i> | 2,25114474  | 2,207606054 | 2,83033291  | 2,430898264 | 3,227025885 |
| <i>Pnmt</i>          | 2,205020757 | 2,336923463 | 2,785611829 | 2,411268388 | 3,065450839 |
| <i>Mxd3</i>          | 2,392189611 | 2,302610305 | 2,814012248 | 2,369812957 | 2,988920975 |
| <i>Armc7</i>         | 2,314853742 | 2,401126677 | 3,061587453 | 2,378983858 | 3,003728433 |
| <i>Tmem66</i>        | 2,198918744 | 2,237843415 | 2,84679767  | 2,425788668 | 2,802671967 |
| <i>Srebfl1</i>       | 2,358965436 | 2,376166408 | 2,659378898 | 2,171474704 | 2,757625856 |
| <i>Gm962</i>         | 2,369096222 | 2,38618934  | 2,78240311  | 2,179351052 | 2,922708519 |
| <i>D5Erttd605e</i>   | 2,47468567  | 2,682848301 | 2,578992354 | 2,194805833 | 3,074904114 |
| <i>Socs3</i>         | 2,59964547  | 2,723263044 | 2,894512737 | 2,919260071 | 4,07397012  |
| <i>Gtf2i</i>         | 2,466504768 | 2,793077548 | 3,134924511 | 2,816425079 | 3,162716033 |
| <i>Ubxn11</i>        | 2,795642967 | 2,699512027 | 2,984802049 | 2,696259187 | 2,938044642 |
| <i>Rara</i>          | 2,776419349 | 2,817917896 | 2,993722366 | 2,656310472 | 3,078822697 |
| <i>Gpr183</i>        | 2,588577829 | 3,379796969 | 2,985199642 | 2,676397204 | 2,945613577 |
| <i>4930417013Rik</i> | 2,478150362 | 3,131967316 | 3,031549127 | 2,616859454 | 2,902811253 |
| <i>Gnai2</i>         | 2,599508073 | 2,885747626 | 2,921109399 | 2,75451206  | 2,883247218 |
| <i>Gm9054</i>        | 2,695388394 | 3,376411395 | 3,74064222  | 2,810750893 | 3,285862668 |
| <i>Rbm38</i>         | 2,722770473 | 3,161789127 | 3,263023387 | 2,754053903 | 3,201786332 |
| <i>Hmga1</i>         | 2,723714926 | 2,93539474  | 3,175123077 | 2,624628696 | 3,006329007 |
| <i>Hmga1-rs1</i>     | 2,730499878 | 2,949240716 | 3,182065235 | 2,623118303 | 3,006366838 |
| <i>Rgs10</i>         | 2,637171237 | 3,087930176 | 2,83056452  | 2,724099086 | 2,707520792 |
| <i>Dusp10</i>        | 2,58019481  | 3,113091231 | 2,8787521   | 2,725282765 | 2,789147872 |
| <i>Hsbp1</i>         | 2,547864197 | 2,945465076 | 3,065932045 | 2,905485417 | 2,65387116  |
| <i>Znrf1</i>         | 2,780260982 | 2,938694028 | 2,986819481 | 2,688551408 | 2,648078245 |
| <i>Rab3ip</i>        | 2,534321079 | 3,065190457 | 3,258665462 | 3,223182715 | 3,376098928 |
| <i>Vps37b</i>        | 2,516824523 | 3,418317853 | 3,688400662 | 3,356134296 | 3,749747026 |
| <i>6430527G18Rik</i> | 2,574909782 | 3,843740725 | 4,175225736 | 3,99620968  | 4,397273004 |
| <i>Tap1</i>          | 2,445938979 | 3,103542023 | 3,325538301 | 3,233951423 | 3,775154354 |
| <i>Mrpl52</i>        | 2,538038837 | 2,980123839 | 2,841915589 | 3,105594611 | 3,360181556 |
| <i>Itpkb</i>         | 2,340955831 | 3,143597654 | 3,252734866 | 2,996573049 | 3,205419154 |
| <i>Mex3b</i>         | 2,345209032 | 3,149301547 | 3,284495187 | 3,446009524 | 3,557269212 |
| <i>Lef1</i>          | 2,388048049 | 3,835977566 | 3,871258002 | 3,512727276 | 3,848958009 |
| <i>Lbh</i>           | 2,315598859 | 3,078737994 | 3,262165467 | 2,946625224 | 3,116174088 |
| <i>Rac2</i>          | 2,40086424  | 2,905066386 | 3,104932179 | 2,901297617 | 3,079286222 |
| <i>Fam176b</i>       | 2,599992238 | 2,903669087 | 3,08796945  | 3,0373575   | 3,316323236 |
| <i>Ucp2</i>          | 2,621155205 | 2,855280217 | 2,972768814 | 3,012837103 | 3,112509215 |
| <i>Klf13</i>         | 2,700469218 | 2,866862961 | 3,282490015 | 2,913907937 | 3,270361295 |
| <i>Lat</i>           | 2,729326767 | 3,32130541  | 3,429354666 | 3,034984615 | 3,332174638 |
| <i>E030018B13Rik</i> | 2,693235672 | 3,338711108 | 3,682627011 | 3,506660787 | 3,519803253 |
| <i>Nab2</i>          | 2,633727581 | 4,344160851 | 4,039224526 | 3,511261616 | 3,623417649 |
| <i>Zbtb22</i>        | 2,654998795 | 3,223710059 | 3,478276105 | 3,680985437 | 3,636478701 |
| <i>Eid3</i>          | 2,603161325 | 2,761364698 | 2,674491404 | 3,085710827 | 3,058823391 |
| <i>Prr24</i>         | 2,364731485 | 2,998758365 | 2,871676899 | 2,513132095 | 2,722529596 |
| <i>A430093F15Rik</i> | 2,436907717 | 2,977599308 | 2,784074603 | 2,630332438 | 2,587041639 |
| <i>Itk</i>           | 2,26742787  | 2,874264526 | 2,858374502 | 2,412736565 | 2,615949878 |
| <i>Ppp1r16b</i>      | 2,331608303 | 2,763495569 | 2,867724634 | 2,45135061  | 2,666927691 |
| <i>Rinl</i>          | 2,513140923 | 2,70635092  | 2,812950144 | 2,661006332 | 2,701604586 |
| <i>D16Erttd472e</i>  | 2,577135489 | 2,765709794 | 2,855198304 | 2,616581827 | 2,856684272 |
| <i>Mob3a</i>         | 2,417340954 | 2,677733309 | 2,848019543 | 2,435104349 | 2,815268804 |

|                      |             |             |             |             |             |
|----------------------|-------------|-------------|-------------|-------------|-------------|
| <i>B9d2</i>          | 2,474192991 | 2,774908453 | 2,728093843 | 2,47643936  | 2,882055821 |
| <i>Tapbp1</i>        | 2,508589165 | 2,842950437 | 2,846588697 | 2,587703607 | 3,077877244 |
| <i>Rps6kb2</i>       | 2,372185531 | 2,834409445 | 2,869190733 | 2,622987456 | 3,032353855 |
| <i>Cd3e</i>          | 2,502530145 | 2,751374518 | 3,060244966 | 2,64476621  | 3,065910173 |
| <i>Selp1g</i>        | 2,365245206 | 2,726784735 | 3,460540206 | 2,6352879   | 3,165425802 |
| <i>Scd2</i>          | 2,310896309 | 3,318723878 | 3,193778577 | 2,791784714 | 3,02716568  |
| <i>Zap70</i>         | 2,283827055 | 2,902008292 | 3,0556285   | 2,651135758 | 3,048559046 |
| <i>Nacad</i>         | 2,160740612 | 2,692259338 | 2,816487607 | 3,007363155 | 3,127784273 |
| <i>Zfp703</i>        | 2,14776527  | 2,772272993 | 2,924917623 | 3,109659619 | 3,308725348 |
| <i>Psemb9</i>        | 2,025108667 | 2,783214575 | 2,982746056 | 3,028376385 | 3,32694789  |
| <i>Tubb5</i>         | 1,970939074 | 2,733908911 | 3,16571356  | 2,919063591 | 3,472339524 |
| <i>Sept9</i>         | 2,225631927 | 2,754868467 | 2,906397563 | 2,720990697 | 2,923339317 |
| <i>Cbx4</i>          | 2,215748992 | 2,783016325 | 2,87903755  | 2,702992679 | 3,051919061 |
| <i>Anp32a</i>        | 2,098006667 | 2,741411997 | 2,836246133 | 2,80733114  | 2,926275138 |
| <i>Ddit4</i>         | 2,095286164 | 2,758999495 | 2,935815463 | 3,061421306 | 2,534429683 |
| <i>Gm5547</i>        | 2,257693655 | 2,690673931 | 3,07950242  | 3,057590132 | 2,528849735 |
| <i>Cyba</i>          | 2,244456133 | 2,483858368 | 2,904644315 | 2,539785036 | 3,048223863 |
| <i>A530088E08Rik</i> | 2,303413383 | 2,582807217 | 3,260804196 | 2,58397964  | 3,005787153 |
| <i>Gtpbp6</i>        | 2,255300349 | 2,575868659 | 2,828863965 | 2,7527478   | 3,209614535 |
| <i>Mvd</i>           | 2,242352338 | 2,561063205 | 2,952558068 | 2,761937484 | 3,011320861 |
| <i>Tmc6</i>          | 2,081342689 | 2,5810489   | 2,96086293  | 2,584372404 | 2,958266735 |
| <i>Grap2</i>         | 2,032948676 | 2,5755143   | 2,94198813  | 2,601696099 | 3,197908359 |
| <i>Gm128</i>         | 2,129914175 | 2,377407109 | 2,984446881 | 2,975792759 | 3,264954698 |
| <i>Foxk1</i>         | 1,146471419 | 2,440760112 | 2,771795283 | 2,842750912 | 3,112458468 |
| <i>Tgfbr2</i>        | 1,297448054 | 2,501811615 | 2,786105519 | 2,80665639  | 3,021583765 |
| <i>Ddx5</i>          | 1,123184075 | 2,354129314 | 2,733732109 | 2,591111332 | 2,962479731 |
| <i>Zc3hav1</i>       | 1,155460781 | 2,456551267 | 2,827545898 | 2,547154378 | 2,950438304 |
| <i>Myl12a</i>        | 0,982222579 | 2,482083831 | 3,135272546 | 2,806353767 | 3,287088908 |
| <i>Aip</i>           | 1,11962978  | 2,585225795 | 2,72035899  | 2,749771765 | 2,693704533 |
| <i>Tuba4a</i>        | 1,149810575 | 2,62414013  | 2,846073265 | 2,645025845 | 2,638299701 |
| <i>Wdr46</i>         | 0,889489562 | 2,59276915  | 2,482676482 | 2,822451915 | 2,724379501 |
| <i>H2-T24</i>        | 0,998778531 | 2,726759015 | 2,540605692 | 3,042389608 | 2,828907229 |
| <i>Zfp706</i>        | 0,787975837 | 2,341699033 | 2,540826852 | 2,461796746 | 2,593019667 |
| <i>Skil</i>          | 0,687782199 | 2,462388396 | 2,496437764 | 2,560869326 | 2,55525154  |
| <i>Pglyrp2</i>       | 0,966951093 | 2,585274786 | 2,402054827 | 2,512631089 | 2,674591381 |
| <i>Arhgap30</i>      | 0,828275251 | 2,514108324 | 2,75489987  | 2,569582184 | 2,84846227  |
| <i>Nfkbiz</i>        | 0,938774983 | 2,423080761 | 2,599536809 | 2,522843565 | 2,859849151 |
| <i>Spsb1</i>         | 0,921396819 | 2,462327259 | 2,832833374 | 2,543007676 | 2,672352237 |
| <i>Ptp4a2</i>        | 1,028100835 | 2,433986084 | 2,742597039 | 2,485287851 | 2,699955028 |
| <i>Atxn7l3</i>       | 0,898599121 | 2,263106875 | 2,531605454 | 2,610051056 | 2,640144564 |
| <i>Fam46c</i>        | 0,776031457 | 2,198017755 | 2,306456591 | 2,577445665 | 2,56241853  |
| <i>Enc1</i>          | 0,983487488 | 2,174237634 | 2,341794085 | 2,711549659 | 2,768639601 |
| <i>Med11</i>         | 0,890815621 | 2,314497018 | 2,324263887 | 2,820715331 | 2,720153959 |
| <i>Clta</i>          | 0,84776774  | 1,969531773 | 2,635763692 | 2,312688547 | 2,774927273 |
| <i>Rtp4</i>          | 0,662960366 | 2,117693515 | 2,663927647 | 2,403535377 | 2,723698037 |
| <i>Tmem20</i>        | 0,669946405 | 1,881614757 | 2,583310922 | 2,545495903 | 2,901989304 |
| <i>Ctsw</i>          | 0,833083929 | 2,105732935 | 3,333710916 | 2,292697443 | 3,435283319 |
| <i>Irf9</i>          | 0,940996816 | 2,34325966  | 2,631868562 | 2,922700793 | 2,950572338 |
| <i>Amigo2</i>        | 0,938252017 | 2,063317527 | 2,526509388 | 3,022414045 | 3,266237711 |
| <i>Lrrc8a</i>        | 1,209666329 | 1,995673557 | 2,892106918 | 2,858696125 | 3,312845945 |
| <i>Zfp280b</i>       | 1,475010659 | 2,556567845 | 2,608785339 | 2,542743382 | 2,68329899  |

|                      |             |             |             |             |             |
|----------------------|-------------|-------------|-------------|-------------|-------------|
| <i>A130010J15Rik</i> | 1,547417018 | 2,533168602 | 2,578822588 | 2,617402989 | 2,74785361  |
| <i>Ywhab</i>         | 1,413641892 | 2,463240682 | 2,502204436 | 2,577751434 | 2,840590742 |
| <i>Ado</i>           | 1,581463001 | 2,707214379 | 2,602998915 | 2,549156734 | 2,907207402 |
| <i>Ptbp1</i>         | 1,446360626 | 2,487656654 | 2,747819539 | 2,650301026 | 2,882262669 |
| <i>Stk24</i>         | 1,389438948 | 2,483552477 | 2,776855547 | 2,665128394 | 2,90761339  |
| <i>Srsf3</i>         | 1,469548572 | 2,556943734 | 2,847743023 | 2,600189422 | 2,889656961 |
| <i>Zbtb1</i>         | 1,412474645 | 2,479018283 | 2,744442869 | 2,499349453 | 2,869893422 |
| <i>Tmbim6</i>        | 1,411628863 | 2,382959691 | 2,824287097 | 2,646345049 | 2,802339848 |
| <i>Myc</i>           | 1,635145764 | 2,481897791 | 2,789932487 | 2,615062957 | 2,860672798 |
| <i>Mbd2</i>          | 1,571605378 | 2,456727333 | 2,769558454 | 2,523693348 | 2,696115049 |
| <i>Rcan3</i>         | 1,437720354 | 2,551353472 | 2,409101273 | 2,526570303 | 2,316951406 |
| <i>Dusp1</i>         | 1,556456765 | 2,573992854 | 2,475000153 | 2,648662484 | 2,297680313 |
| <i>Cmtm6</i>         | 1,604715525 | 2,5511804   | 2,417416369 | 2,531842229 | 2,541996491 |
| <i>Gimap4</i>        | 1,618748711 | 2,526978522 | 2,526559038 | 2,709568236 | 2,445501778 |
| <i>Mepce</i>         | 1,647207234 | 2,364677911 | 2,594136558 | 2,781254802 | 2,345266501 |
| <i>Arf3</i>          | 1,094110711 | 2,372787662 | 2,599971735 | 2,134882422 | 2,530583961 |
| <i>Itgb2</i>         | 1,156351899 | 2,413760718 | 2,474790644 | 2,206991075 | 2,400440421 |
| <i>Ywhaz</i>         | 1,098461788 | 2,611378678 | 2,638521199 | 2,26229274  | 2,501979096 |
| <i>Gimap3</i>        | 1,075931651 | 2,438658419 | 2,519183206 | 2,223971905 | 2,160553535 |
| <i>Grap</i>          | 1,531084321 | 2,46669438  | 2,448613298 | 2,298050591 | 2,476575555 |
| <i>Cela1</i>         | 1,483475881 | 2,382030506 | 2,386309013 | 2,219458959 | 2,441515874 |
| <i>Scamp3</i>        | 1,434754953 | 2,455636566 | 2,449767346 | 2,237224338 | 2,603624247 |
| <i>Myliip</i>        | 1,389044922 | 2,477817513 | 2,27245902  | 2,396023312 | 2,43711911  |
| <i>Prkcq</i>         | 1,24512522  | 2,467434524 | 2,538416524 | 2,41259232  | 2,573402513 |
| <i>Zbed6</i>         | 1,259244434 | 2,323495784 | 2,43285637  | 2,321237876 | 2,55258076  |
| <i>Ldb1</i>          | 1,210402316 | 2,398943438 | 2,480748693 | 2,473579189 | 2,388923048 |
| <i>Emg1</i>          | 1,436797891 | 2,339789049 | 2,558692668 | 2,447438629 | 2,512375737 |
| <i>Siah1a</i>        | 1,24219263  | 2,328235752 | 2,704274218 | 2,24939625  | 2,548761949 |
| <i>Arrb2</i>         | 1,224252036 | 2,395681864 | 2,895278366 | 2,366572328 | 2,669762127 |
| <i>Mettl7b</i>       | 1,091641104 | 2,383222967 | 2,808578076 | 2,483027331 | 2,436078976 |
| <i>Kbtbd2</i>        | 1,163687625 | 2,346238078 | 2,58817455  | 2,388156202 | 2,761181948 |
| <i>Clk1</i>          | 1,055367272 | 2,315727424 | 2,541993901 | 2,340061658 | 2,674091549 |
| <i>Ddx6</i>          | 1,094761623 | 2,259265888 | 2,554494131 | 2,452313304 | 2,864645222 |
| <i>Tmed1</i>         | 1,095623057 | 2,169671019 | 2,660552815 | 2,291907777 | 3,147131839 |
| <i>Vasp</i>          | 1,141671638 | 2,254613482 | 2,624227836 | 2,210987957 | 2,877123603 |
| <i>Psme1</i>         | 1,200392736 | 1,904018565 | 2,814576093 | 2,492527112 | 3,141909297 |
| <i>Tpst2</i>         | 1,380385598 | 2,061569321 | 2,84979335  | 2,215239554 | 3,12484936  |
| <i>Dvl2</i>          | 1,428776779 | 2,029648182 | 2,651622511 | 2,377486237 | 2,927763222 |
| <i>Twf2</i>          | 1,461199539 | 2,064380927 | 2,642567383 | 2,267442738 | 2,842389013 |
| <i>Panx1</i>         | 1,276088446 | 2,127070273 | 2,557474059 | 2,303251101 | 2,788443981 |
| <i>Gli1</i>          | 1,278039989 | 2,154443081 | 2,609094359 | 2,289387533 | 2,830482669 |
| <i>Stk10</i>         | 1,538813137 | 2,087628009 | 2,564865016 | 2,535987928 | 2,877387341 |
| <i>Ppp2r5a</i>       | 1,535499284 | 2,094957575 | 2,468274663 | 2,478583946 | 2,754416318 |
| <i>Prkch</i>         | 1,63441851  | 2,237988838 | 2,665982044 | 2,473806154 | 2,876357507 |
| <i>Ccdc88c</i>       | 1,639818949 | 2,329698327 | 2,604333971 | 2,507091882 | 2,799586629 |
| <i>Npc2</i>          | 1,573237794 | 2,255148092 | 2,794263307 | 2,378767308 | 2,812792098 |
| <i>Ankrd11</i>       | 1,595601125 | 2,291036681 | 2,541208976 | 2,304408936 | 2,644639822 |
| <i>Elovl5</i>        | 1,572220892 | 2,206603309 | 2,54895766  | 2,346994534 | 2,728238916 |
| <i>Ggn</i>           | 1,602448344 | 2,269105301 | 2,57499312  | 2,216461293 | 2,85536047  |
| <i>Tmem189</i>       | 1,674767073 | 2,067086631 | 2,521415164 | 2,091750366 | 2,680450268 |
| <i>Map4k2</i>        | 1,604414143 | 2,045108152 | 2,736191982 | 2,16969709  | 2,660718401 |

|                      |             |             |             |             |             |
|----------------------|-------------|-------------|-------------|-------------|-------------|
| <i>Rab35</i>         | 1,461608886 | 2,147523406 | 2,49193663  | 2,160922497 | 2,590738927 |
| <i>Rmnd5b</i>        | 1,436892926 | 2,181941626 | 2,45128904  | 2,242494663 | 2,509235963 |
| <i>Cecr6</i>         | 1,44643066  | 2,198797133 | 2,596874256 | 2,195206418 | 2,523935453 |
| <i>Cd37</i>          | 1,481587235 | 2,271814021 | 2,385471041 | 2,788299637 | 2,842635614 |
| <i>Rpl13a</i>        | 1,522887093 | 2,047663369 | 2,32643176  | 2,972959509 | 3,493694236 |
| <i>Nfe2l2</i>        | 1,512724897 | 2,186084513 | 2,681195727 | 2,699751723 | 2,9353225   |
| <i>Cdc42se1</i>      | 1,528618293 | 2,20481394  | 2,62683379  | 2,960899709 | 3,135190348 |
| <i>Thap3</i>         | 1,433914214 | 2,108133811 | 2,288686544 | 2,669540256 | 2,689248688 |
| <i>Eef2</i>          | 1,403201369 | 1,954094326 | 2,307106892 | 2,662387061 | 2,829222276 |
| <i>Arhgef1</i>       | 1,23806275  | 2,136109772 | 2,419992799 | 2,567918856 | 2,725058593 |
| <i>Frmnd8</i>        | 1,365272828 | 2,12172655  | 2,442498262 | 2,5122427   | 2,681639301 |
| <i>Cd79a</i>         | 1,19234886  | 2,242654539 | 2,564564373 | 2,665855503 | 2,820374491 |
| <i>Aprt</i>          | 1,755655581 | 1,967492226 | 2,736165613 | 2,559389953 | 3,316951915 |
| <i>Dtx1</i>          | 1,810037935 | 1,984424374 | 2,445073404 | 2,710791913 | 3,298600149 |
| <i>Irf2bp1</i>       | 1,692244937 | 1,89034889  | 2,385021034 | 2,384290414 | 3,292581266 |
| <i>Rpl18</i>         | 1,710803568 | 2,071185703 | 2,3062235   | 2,393248462 | 2,955064898 |
| <i>Eif4a2</i>        | 1,320758134 | 2,710142227 | 2,957460789 | 2,652195771 | 2,963872345 |
| <i>Chchd10</i>       | 1,411466882 | 2,685989684 | 3,033402273 | 2,692898017 | 2,842013975 |
| <i>Arid1a</i>        | 1,464301245 | 2,695356039 | 2,854809308 | 2,601653008 | 2,776823549 |
| <i>Cdk17</i>         | 1,479361025 | 2,657199522 | 2,789736512 | 2,527882386 | 2,853364995 |
| <i>Itm2b</i>         | 1,585882247 | 2,727379235 | 2,779127927 | 2,721226202 | 2,828755139 |
| <i>Etv3</i>          | 1,488576517 | 2,860034533 | 2,796413128 | 2,750793565 | 2,813817326 |
| <i>Srsf9</i>         | 1,321205851 | 2,842916453 | 2,813938363 | 2,783231154 | 3,226226346 |
| <i>BC024582</i>      | 1,254101868 | 2,748330437 | 2,701167215 | 2,832280291 | 2,928044613 |
| <i>Gramd1a</i>       | 1,414043079 | 2,622235685 | 2,767899915 | 2,787995593 | 3,272386471 |
| <i>Cd68</i>          | 1,578835201 | 2,887520711 | 3,059784072 | 2,49420398  | 3,502171974 |
| <i>U2af1l4</i>       | 1,449650018 | 2,963721239 | 3,232302045 | 2,70667802  | 3,541128654 |
| <i>Zfp281</i>        | 1,33214927  | 3,173109279 | 2,789850103 | 2,445045031 | 2,866377886 |
| <i>Zfp36l1</i>       | 1,262703333 | 4,055934919 | 3,873741735 | 3,350449767 | 3,659360973 |
| <i>B3galt4</i>       | 1,35616481  | 3,295089249 | 3,342967456 | 3,178998199 | 3,979971977 |
| <i>Isg15</i>         | 1,153451103 | 2,995716033 | 3,373678743 | 3,806484762 | 3,177173687 |
| <i>Gpr18</i>         | 0,905570096 | 3,570454413 | 3,794317792 | 3,49737786  | 4,055207518 |
| <i>Tmem149</i>       | 1,025230617 | 2,948674931 | 3,425587645 | 2,975665712 | 3,339048697 |
| <i>Cd7</i>           | 0,559154821 | 2,608282253 | 2,916815117 | 2,699129519 | 3,158840969 |
| <i>S1pr1</i>         | 0,684437676 | 3,086182189 | 3,226308209 | 2,468793924 | 2,632414594 |
| <i>4930502E09Rik</i> | 2,164695808 | 2,40156596  | 2,724662519 | 2,760624491 | 3,407066136 |
| <i>Plcxd1</i>        | 2,127681237 | 2,350113682 | 2,794676595 | 2,744694128 | 3,163798747 |
| <i>Il21r</i>         | 2,147281299 | 2,265114868 | 2,900514975 | 2,626913727 | 3,030913421 |
| <i>Coro1a</i>        | 2,068053347 | 2,203951265 | 2,714816872 | 2,724926702 | 2,961254028 |
| <i>Pygm</i>          | 2,084264003 | 2,202905662 | 2,652276415 | 2,554891437 | 3,043762599 |
| <i>Coro1b</i>        | 2,045640866 | 2,252417453 | 2,474961301 | 2,70301171  | 3,134168131 |
| <i>Mfsd10</i>        | 2,053657741 | 2,267347252 | 2,368312233 | 2,577621713 | 2,916426731 |
| <i>2410016O06Rik</i> | 2,044933706 | 2,068722042 | 2,475879714 | 2,687961618 | 2,866060208 |
| <i>Ncf1</i>          | 1,984506988 | 2,443792715 | 2,755247056 | 2,402788076 | 3,151118925 |
| <i>Fam107b</i>       | 2,107391216 | 2,394709532 | 2,661100517 | 2,419351674 | 2,926139121 |
| <i>Laptm5</i>        | 2,118707048 | 2,676633846 | 2,714971156 | 2,445419843 | 2,910288404 |
| <i>Cd3g</i>          | 2,014776582 | 2,325427898 | 2,648674223 | 2,350716756 | 2,71607583  |
| <i>Ptpn6</i>         | 1,981280329 | 2,440720639 | 2,73901741  | 2,327899969 | 2,727515503 |
| <i>Keap1</i>         | 1,94802541  | 2,394496568 | 2,593993703 | 2,358439552 | 2,84234266  |
| <i>Spns1</i>         | 1,970065964 | 2,481291774 | 2,495731873 | 2,467016254 | 2,776368082 |
| <i>Gpr132</i>        | 1,953805654 | 2,467938361 | 2,471974553 | 2,376937068 | 2,695792059 |

|                      |             |             |             |             |             |
|----------------------|-------------|-------------|-------------|-------------|-------------|
| <i>Wasf2</i>         | 2,054797169 | 2,459133739 | 2,554207112 | 2,394786222 | 2,669932104 |
| <i>Cyth4</i>         | 1,819365454 | 2,229832151 | 2,752677792 | 2,277589239 | 2,845868061 |
| <i>Acp5</i>          | 1,946119409 | 2,203561466 | 2,73440764  | 2,244390231 | 3,468904553 |
| <i>Eef1a1</i>        | 1,863517037 | 2,27018953  | 2,748759708 | 2,408447425 | 3,080644538 |
| <i>Sbk1</i>          | 1,908338252 | 2,246334887 | 2,686102331 | 2,461379887 | 2,903437417 |
| <i>Hcst</i>          | 1,607506992 | 2,089395767 | 2,953219161 | 2,560775665 | 3,010741747 |
| <i>2610019F03Rik</i> | 1,679476806 | 2,175346575 | 3,223038572 | 2,573563425 | 3,2251831   |
| <i>Zbtb7a</i>        | 1,696805696 | 2,215827253 | 2,802458318 | 2,513264791 | 3,232227761 |
| <i>Sik1</i>          | 1,973310792 | 2,049833914 | 2,775751169 | 1,895982658 | 2,880215837 |
| <i>Hdac7</i>         | 2,027213393 | 2,113943847 | 2,780858158 | 1,923683561 | 2,712238984 |
| <i>Ly6g5b</i>        | 1,871664098 | 2,072315486 | 3,243388023 | 2,07735089  | 3,198226681 |
| <i>Pmepa1</i>        | 1,736736936 | 1,969467319 | 2,923992652 | 2,094302244 | 3,003300791 |
| <i>Grifin</i>        | 2,062222979 | 1,983609333 | 2,587257083 | 1,972952539 | 3,31249407  |
| <i>Rras2</i>         | 1,805592438 | 2,029090994 | 2,658725628 | 2,15621519  | 3,061603316 |
| <i>Cirbp</i>         | 1,984231695 | 2,016968989 | 2,568255051 | 2,389108793 | 3,418753614 |
| <i>Bcl9l</i>         | 2,025181821 | 1,822678777 | 2,610607269 | 2,279173685 | 3,125049021 |
| <i>Sh2b1</i>         | 1,770555287 | 2,359393941 | 2,508139313 | 2,345113484 | 2,42321701  |
| <i>Snx18</i>         | 1,669565369 | 2,494773197 | 2,442413329 | 2,34751213  | 2,434170909 |
| <i>Shisa5</i>        | 1,541455702 | 2,322879966 | 2,526915526 | 2,227880746 | 2,395031626 |
| <i>Dedd2</i>         | 1,772365909 | 2,449468155 | 2,324980946 | 2,169082672 | 2,543714142 |
| <i>Mlec</i>          | 1,842288584 | 2,518969897 | 2,425153689 | 2,133479556 | 2,398357245 |
| <i>Tnfaip3</i>       | 1,658952045 | 2,510511993 | 2,672537864 | 2,135722476 | 2,595432609 |
| <i>Elk3</i>          | 1,663061329 | 2,481126911 | 2,562391039 | 2,185458437 | 2,51913576  |
| <i>Arf5</i>          | 1,585634606 | 2,691135067 | 2,632536092 | 2,280275832 | 2,54285575  |
| <i>Vezf1</i>         | 1,699371951 | 2,565706861 | 2,589941479 | 2,303907489 | 2,587719211 |
| <i>Ikzf1</i>         | 1,835055046 | 2,499111285 | 2,645998041 | 2,336473256 | 2,549555587 |
| <i>Slc35b2</i>       | 1,713779336 | 2,402482078 | 2,382739546 | 2,373184622 | 2,703077811 |
| <i>Gltp</i>          | 1,671678541 | 2,316378319 | 2,508042642 | 2,389212314 | 2,763785059 |
| <i>Tle3</i>          | 1,673670108 | 2,372517996 | 2,521963861 | 2,407102978 | 2,657029718 |
| <i>Rbfa</i>          | 1,642009906 | 2,415782909 | 2,551579662 | 2,469885432 | 2,622074863 |
| <i>Sh2d2a</i>        | 1,63674509  | 2,407686065 | 2,616099718 | 2,359613616 | 2,586867081 |
| <i>Gm20605</i>       | 1,818081047 | 2,204112988 | 2,497792431 | 2,32711689  | 2,572349058 |
| <i>6530439I21</i>    | 1,742194322 | 2,184177366 | 2,533599355 | 2,259582282 | 2,59482976  |
| <i>Elf1</i>          | 1,635872329 | 2,262431216 | 2,485012841 | 2,275020597 | 2,51947516  |
| <i>Jak1</i>          | 1,726558473 | 2,287596825 | 2,517909224 | 2,259164805 | 2,510929075 |
| <i>Kif21b</i>        | 1,773864665 | 2,328888197 | 2,350328053 | 2,29745189  | 2,529793416 |
| <i>Pik3r1</i>        | 1,840052591 | 2,325680843 | 2,372056783 | 2,355172657 | 2,606325417 |
| <i>Bcdin3d</i>       | 1,774550458 | 2,213708289 | 2,364079603 | 2,366537012 | 2,579421096 |
| <i>Tob1</i>          | 1,864476485 | 2,281097631 | 2,486834242 | 2,251816803 | 2,64331567  |
| <i>Rcc2</i>          | 1,853171586 | 2,296271868 | 2,47633479  | 2,311417485 | 2,722367545 |
| <i>Fmn1l</i>         | 1,875820121 | 2,351301815 | 2,584500138 | 2,251761076 | 2,680346435 |
| <i>Zfp513</i>        | 1,767579054 | 2,353053802 | 2,338146613 | 2,179383416 | 2,790060496 |
| <i>1110038F14Rik</i> | 1,653499821 | 2,322870555 | 2,154146292 | 1,997472877 | 2,783931548 |
| <i>Ubc</i>           | 1,525259902 | 2,38767694  | 2,279624788 | 2,064584172 | 2,599817539 |
| <i>Fam58b</i>        | 1,679484629 | 2,609211928 | 2,417257108 | 2,174129084 | 2,951270303 |
| <i>Tctex1d4</i>      | 1,504973271 | 2,53358072  | 2,017392427 | 2,396836972 | 2,911720358 |
| <i>Ptger1</i>        | 2,009085793 | 2,436370047 | 2,368050489 | 2,4543005   | 3,172145587 |
| <i>Nme3</i>          | 1,864540947 | 2,453866364 | 2,132685808 | 2,429250245 | 3,340346505 |
| <i>Tbx6</i>          | 1,724362346 | 2,490693069 | 2,493173512 | 2,658270352 | 2,99428266  |
| <i>Slc39a7</i>       | 1,713189664 | 2,515637914 | 2,2555447   | 2,577727676 | 3,01838312  |
| <i>Gm15706</i>       | 1,927200967 | 2,506574139 | 2,335795939 | 2,77253692  | 2,610622299 |

|                      |             |             |             |             |             |
|----------------------|-------------|-------------|-------------|-------------|-------------|
| <i>Krtcap3</i>       | 2,156453739 | 2,575152939 | 2,224379811 | 2,685047245 | 2,612909294 |
| <i>Vamp2</i>         | 2,135082039 | 2,291651222 | 2,198241253 | 2,598884877 | 2,588564708 |
| <i>Cdca4</i>         | 2,09934855  | 2,378506567 | 2,527118779 | 2,485059847 | 2,517197802 |
| <i>Lck</i>           | 2,166358232 | 2,356983744 | 2,612194636 | 2,479076998 | 2,533687072 |
| <i>Dgkz</i>          | 2,017849868 | 2,518931804 | 2,571669743 | 2,487349757 | 2,540352424 |
| <i>Cited2</i>        | 2,164952744 | 2,48276366  | 2,496905096 | 2,595544162 | 2,252981719 |
| <i>4933411E08Rik</i> | 1,936624271 | 2,418529851 | 2,40864602  | 2,353777089 | 2,424842122 |
| <i>St8sia1</i>       | 1,961489043 | 2,410552657 | 2,348253226 | 2,355094448 | 2,409463813 |
| <i>Degs1</i>         | 2,033877502 | 2,457791702 | 2,419540487 | 2,40522733  | 2,431811736 |
| <i>Rrad</i>          | 1,976017068 | 2,334787792 | 2,417586625 | 2,493438288 | 2,276515707 |
| <i>Stat5b</i>        | 2,083872178 | 2,478623157 | 2,557629225 | 2,206875054 | 2,364477973 |
| <i>Adcy6</i>         | 2,054643113 | 2,403609049 | 2,657639517 | 2,366381098 | 2,327942502 |
| <i>Gimap9</i>        | 2,043058758 | 2,6561782   | 2,573937075 | 2,347850919 | 2,213878266 |
| <i>Cd28</i>          | 2,068652692 | 2,811901091 | 2,742126982 | 2,46855     | 2,385382712 |
| <i>Gata3</i>         | 1,942721464 | 3,000542998 | 2,532465222 | 2,551014854 | 2,281510552 |
| <i>Dusp7</i>         | 1,825536281 | 2,806000409 | 2,51111956  | 2,455703818 | 2,536278657 |
| <i>Rps11</i>         | 1,80998932  | 3,216809223 | 3,652714232 | 2,302580551 | 2,383793571 |
| <i>Klf2</i>          | 2,243219841 | 3,52062575  | 4,25334922  | 2,162286295 | 2,573150823 |
| <i>Etnk1</i>         | 1,746704165 | 2,962548788 | 2,903272666 | 2,733202936 | 2,783605542 |
| <i>Slc9a3r1</i>      | 1,811623071 | 2,917826088 | 3,162740256 | 2,76528396  | 3,103088196 |
| <i>Ccr4</i>          | 1,719419875 | 3,080254306 | 3,098967139 | 2,469618054 | 2,764877023 |
| <i>Tmem88</i>        | 1,800225652 | 3,174083216 | 3,052273187 | 2,739951938 | 2,509247514 |
| <i>I730030J21Rik</i> | 1,880777459 | 3,047093587 | 3,366263043 | 3,083500136 | 2,572319965 |
| <i>Pnrc1</i>         | 1,475180367 | 2,999753003 | 2,965395909 | 2,835888122 | 2,729993045 |
| <i>9330175E14Rik</i> | 1,540993421 | 2,769398019 | 3,476713624 | 2,997053576 | 2,687340468 |
| <i>Tnfaip8l2</i>     | 1,656596261 | 3,325150401 | 3,564797487 | 3,944892342 | 4,264367844 |
| <i>Supt4h1</i>       | 1,670347294 | 3,349725128 | 3,489026895 | 3,248099438 | 3,309421847 |
| <i>Sh3bgrl3</i>      | 1,715105352 | 3,006995502 | 3,182191556 | 3,019441522 | 3,324454048 |
| <i>Rap1b</i>         | 1,62984363  | 3,117117172 | 3,202704589 | 2,895579104 | 3,256351032 |
| <i>BC021614</i>      | 1,538872612 | 2,89625254  | 2,838438638 | 3,271187627 | 3,10426149  |
| <i>Gpr146</i>        | 1,586977873 | 3,113071903 | 2,780474634 | 3,269200823 | 3,294176624 |
| <i>Cd5</i>           | 2,009538456 | 3,459679735 | 3,129670664 | 2,753603507 | 3,224224638 |
| <i>Arhgdib</i>       | 2,014613571 | 2,946592062 | 3,218300405 | 2,869691765 | 3,237167584 |
| <i>Rhof</i>          | 2,07374911  | 2,974823801 | 2,928749553 | 2,727847951 | 2,914961464 |
| <i>Rnf145</i>        | 1,986322756 | 2,89523035  | 2,790184346 | 2,863840621 | 2,908588198 |
| <i>Midn</i>          | 2,003626177 | 2,911746485 | 2,83555434  | 2,915020161 | 3,02559653  |
| <i>Isyna1</i>        | 2,134746834 | 2,99585502  | 2,92520689  | 3,391330888 | 3,675418077 |
| <i>Cotl1</i>         | 2,03942199  | 3,035076413 | 3,48886248  | 3,151043288 | 3,720277284 |
| <i>Cnn2</i>          | 2,19518978  | 2,884698837 | 3,407639671 | 3,205837946 | 3,883991997 |
| <i>Dyrk2</i>         | 2,192274734 | 2,863469667 | 3,694917576 | 3,460230562 | 3,982033418 |
| <i>Ski</i>           | 2,149799096 | 2,911105659 | 3,026933055 | 3,142285634 | 3,252808438 |
| <i>Slc38a2</i>       | 2,217231203 | 2,918455464 | 3,341482692 | 2,956184204 | 3,311732568 |
| <i>Csk</i>           | 2,187947211 | 2,960694333 | 3,108513599 | 2,968983361 | 2,994412217 |
| <i>Kbtbd11</i>       | 1,908047312 | 3,011145135 | 2,870942274 | 3,226377228 | 3,220445879 |
| <i>Abhd8</i>         | 1,920187847 | 2,982259536 | 2,922743624 | 2,920392142 | 3,269422222 |
| <i>Galnt6</i>        | 1,910614373 | 3,01532968  | 3,016965484 | 3,034509417 | 3,10253725  |
| <i>Egr1</i>          | 1,940757987 | 4,444837899 | 4,12518096  | 3,988595594 | 4,151245816 |
| <i>Hnrnp1</i>        | 1,896308128 | 2,961424762 | 3,263688533 | 3,042231005 | 3,209523541 |
| <i>Myh9</i>          | 1,945357445 | 2,967323659 | 3,33157232  | 3,018531591 | 3,357598225 |
| <i>Sfn</i>           | 1,969240931 | 3,08198343  | 2,988120223 | 3,370810561 | 3,156710416 |
| <i>Rln3</i>          | 1,864075549 | 2,981965612 | 3,428843544 | 3,051146742 | 3,847114581 |

|                      |             |             |             |             |             |
|----------------------|-------------|-------------|-------------|-------------|-------------|
| <i>Trex1</i>         | 1,834039593 | 3,539964563 | 3,955872227 | 3,360379404 | 3,442653429 |
| <i>Leprotl1</i>      | 1,801240802 | 2,983065978 | 3,108676194 | 3,085078919 | 3,289632775 |
| <i>Ccr8</i>          | 1,811624015 | 4,33192073  | 3,528872639 | 3,850021927 | 3,544320516 |
| <i>Ifngr2</i>        | 1,784352974 | 3,08292602  | 2,990057082 | 3,026805683 | 3,06179673  |
| <i>Slfn2</i>         | 1,826297224 | 2,529632873 | 2,849572483 | 2,680414229 | 3,057457197 |
| <i>Gnb2</i>          | 1,849480564 | 2,534494392 | 2,868696806 | 2,683932384 | 3,004413821 |
| <i>Mdk</i>           | 1,942836485 | 2,516660967 | 2,887594748 | 2,663520028 | 2,92483859  |
| <i>Itprp</i>         | 1,760033732 | 2,472723019 | 2,783513778 | 2,700029299 | 2,952929926 |
| <i>Ddx39b</i>        | 1,781135233 | 2,369742677 | 2,758101918 | 2,748680893 | 3,015276475 |
| <i>Hnrpd1</i>        | 1,637237415 | 2,609927842 | 2,755902099 | 2,792265113 | 3,115314813 |
| <i>Gna13</i>         | 1,606124121 | 2,567949331 | 2,692230601 | 2,656572142 | 2,98559923  |
| <i>Ccm2</i>          | 1,79481501  | 2,602444271 | 2,753648007 | 2,655427726 | 2,979064937 |
| <i>BC100451</i>      | 1,838089133 | 2,630911386 | 3,10037828  | 2,538925119 | 3,007073133 |
| <i>Cfl1</i>          | 1,698918588 | 2,718573313 | 2,968931014 | 2,627186247 | 3,262627626 |
| <i>Mknk2</i>         | 1,94594482  | 2,604855695 | 3,050177091 | 2,823783986 | 3,705310285 |
| <i>Vgll4</i>         | 1,94116326  | 2,761309033 | 3,024337131 | 2,792901983 | 3,069444381 |
| <i>Zdhhc18</i>       | 1,825563345 | 2,688718567 | 2,976809838 | 2,730701353 | 3,056090829 |
| <i>Eif2c2</i>        | 1,882246878 | 2,650845458 | 3,045382782 | 2,699659895 | 2,910101925 |
| <i>Ppp1cc</i>        | 1,927386475 | 2,398588891 | 2,883908777 | 2,536853774 | 2,825222827 |
| <i>Mylpf</i>         | 2,009091323 | 2,420579823 | 2,86450262  | 2,502693953 | 2,725732494 |
| <i>Slfn1</i>         | 1,832101455 | 2,588872277 | 2,955253399 | 2,727981672 | 2,733601051 |
| <i>Ft3l</i>          | 2,014216085 | 2,355642337 | 2,691844743 | 2,722380121 | 2,794737434 |
| <i>Foxo4</i>         | 1,94961635  | 2,434350019 | 2,742196455 | 2,670585611 | 2,880539107 |
| <i>Pbx2</i>          | 1,986066233 | 2,614915849 | 2,573741441 | 2,689468536 | 2,738047596 |
| <i>Fam102a</i>       | 1,721175452 | 2,77458241  | 2,710402235 | 2,52710406  | 2,734047616 |
| <i>Rasgrp1</i>       | 1,727912754 | 2,736775551 | 2,732571778 | 2,455959466 | 2,535721628 |
| <i>Lasp1</i>         | 1,762420401 | 2,566365275 | 2,650935723 | 2,605551439 | 2,692557985 |
| <i>Ubac2</i>         | 1,71695692  | 2,647271947 | 2,593716266 | 2,589089112 | 2,690271569 |
| <i>Map4k4</i>        | 1,680615757 | 2,548539372 | 2,653252126 | 2,5044997   | 2,709703922 |
| <i>Arhgap9</i>       | 1,858531313 | 2,614084016 | 2,692538493 | 2,406003456 | 2,848897468 |
| <i>Grccl10</i>       | 1,843277932 | 2,713439582 | 2,706641497 | 2,376800232 | 2,872466663 |
| <i>Nat9</i>          | 1,840281704 | 2,588575951 | 2,79048908  | 2,427794954 | 2,82158676  |
| <i>Il6st</i>         | 1,947593978 | 2,71315279  | 2,766517509 | 2,526616121 | 2,688239451 |
| <i>Mboat4</i>        | 1,86206657  | 2,650126667 | 2,688683223 | 2,460280673 | 2,652348667 |
| <i>Cd6</i>           | 1,902035395 | 2,958453655 | 2,706135659 | 2,667404644 | 2,657319192 |
| <i>Al847159</i>      | 1,961248731 | 2,790074092 | 2,73279191  | 2,694472547 | 2,68006176  |
| <i>Tmc8</i>          | 1,804035614 | 2,8032433   | 2,765777237 | 2,694936162 | 2,836326349 |
| <i>Dusp5</i>         | 1,810787846 | 2,742425342 | 2,762413917 | 2,629536665 | 2,731490921 |
| <i>Map3k1</i>        | 1,82240747  | 2,74537486  | 2,640895266 | 2,734370212 | 2,756940172 |
| <i>Ugcg</i>          | 1,871904725 | 2,870930437 | 2,632001426 | 2,734312304 | 2,911479074 |
| <i>BC033916</i>      | 1,581823691 | 2,960647896 | 2,389010021 | 2,902571272 | 3,385790672 |
| <i>1810010H24Rik</i> | 1,965618079 | 2,893271246 | 2,533599826 | 3,069495447 | 2,884322586 |
| <i>Daxx</i>          | 1,977410158 | 2,460037384 | 2,436907636 | 2,937146771 | 2,917479089 |
| <i>Cdk2ap2</i>       | 1,97159933  | 2,623872851 | 2,585002764 | 3,503414912 | 3,808509798 |
| <i>Sap25</i>         | 2,055175304 | 2,605941018 | 2,346487868 | 2,785809982 | 3,475677383 |
| <i>Lfng</i>          | 1,686363407 | 2,565097042 | 2,957775791 | 3,290039731 | 3,739036061 |
| <i>Foxo1</i>         | 1,689398214 | 2,509152781 | 3,033461988 | 3,134757499 | 3,359662063 |
| <i>Ing1</i>          | 1,536612511 | 2,419096493 | 2,930330998 | 2,769183394 | 2,944990376 |
| <i>Gm10345</i>       | 1,613985618 | 2,150070543 | 3,163895334 | 3,281353781 | 3,79060087  |
| <i>Tnfrsf25</i>      | 1,324379257 | 2,780685355 | 2,96844238  | 3,201917624 | 2,97305516  |
| <i>Rac1</i>          | 1,421346836 | 2,731640355 | 2,997118292 | 2,920058816 | 3,291541464 |

|                 |             |             |             |             |             |
|-----------------|-------------|-------------|-------------|-------------|-------------|
| <i>B2m</i>      | 1,385288906 | 2,601058758 | 3,149737454 | 3,033651206 | 3,277566952 |
| <i>Smad7</i>    | 1,149054905 | 2,710368351 | 3,4402401   | 3,401187585 | 3,75000711  |
| <i>Irf1</i>     | 1,275795607 | 2,476064642 | 3,039118053 | 2,863012186 | 3,359967456 |
| <i>Pik3cd</i>   | 1,327400693 | 2,38205278  | 3,333669751 | 3,036159258 | 3,720269046 |
| <i>Sun2</i>     | 1,362369951 | 1,90971188  | 2,273399448 | 2,208468458 | 2,662194964 |
| <i>Prkd2</i>    | 1,302579495 | 1,820341545 | 2,117491115 | 2,226420226 | 2,640892897 |
| <i>Gramd4</i>   | 1,390904059 | 1,936847504 | 2,069178863 | 2,286681998 | 2,767975609 |
| <i>Agpat1</i>   | 1,498958735 | 1,792218908 | 2,101293359 | 2,211835202 | 2,397605064 |
| <i>Scml4</i>    | 1,340263038 | 1,806363671 | 2,089311679 | 2,233380753 | 2,467289574 |
| <i>Athl1</i>    | 1,449726878 | 1,853438841 | 2,176968668 | 2,149679848 | 2,433260209 |
| <i>Strn4</i>    | 1,428849833 | 1,913449293 | 2,266313984 | 2,157451213 | 2,445244683 |
| <i>Cyth1</i>    | 1,361691935 | 1,90628322  | 2,191053288 | 2,210394    | 2,518329725 |
| <i>Nudt3</i>    | 1,336459091 | 1,909776804 | 2,452764392 | 2,129380322 | 2,55255749  |
| <i>Gm10640</i>  | 1,388025583 | 1,952928706 | 2,345744958 | 2,127594592 | 2,533472511 |
| <i>Pcif1</i>    | 1,387346109 | 1,770408371 | 2,406414221 | 2,217062028 | 2,579102391 |
| <i>Wbp2</i>     | 1,269538219 | 1,901507058 | 2,274308484 | 2,297958174 | 2,426500729 |
| <i>Sf1</i>      | 1,235438039 | 1,848265861 | 2,262406774 | 2,199470028 | 2,428469561 |
| <i>Ubtf</i>     | 1,721790122 | 2,058136727 | 2,209559431 | 2,278236062 | 2,567385999 |
| <i>Il17ra</i>   | 1,77664682  | 1,948829027 | 2,128577849 | 2,210871399 | 2,535401673 |
| <i>Dos</i>      | 1,736830417 | 1,88077769  | 2,201969806 | 2,242230434 | 2,591174766 |
| <i>D4Wsu53e</i> | 1,753470326 | 1,928086623 | 2,268512838 | 2,313049442 | 2,595147911 |
| <i>Ctdsp1</i>   | 1,700935846 | 1,841948722 | 2,25470448  | 2,370966664 | 2,476088209 |
| <i>Men1</i>     | 1,792957385 | 1,782622031 | 2,139296298 | 1,997231637 | 2,444055987 |
| <i>Qtrt1</i>    | 1,715567388 | 1,715712615 | 2,192812896 | 2,12001332  | 2,418759054 |
| <i>Cbx7</i>     | 1,868915668 | 1,821960933 | 2,080999928 | 2,155047074 | 2,490689874 |
| <i>Ptpn1</i>    | 1,38810639  | 2,05344463  | 2,325467408 | 2,347158535 | 2,632089004 |
| <i>Tet3</i>     | 1,453848134 | 2,077123558 | 2,398608613 | 2,296874686 | 2,604798745 |
| <i>Gpr171</i>   | 1,491180843 | 2,103338723 | 2,308647635 | 2,368005378 | 2,632493234 |
| <i>Neurl3</i>   | 1,432902852 | 2,114399754 | 2,306239281 | 2,31946041  | 2,667662607 |
| <i>Il27ra</i>   | 1,454743623 | 2,013640248 | 2,469062593 | 2,324220791 | 2,698000604 |
| <i>Srf</i>      | 1,597681374 | 1,982144353 | 2,272677407 | 2,240821016 | 2,588493417 |
| <i>Nfatc1</i>   | 1,471485466 | 2,028307743 | 2,25768333  | 2,180168177 | 2,533261945 |
| <i>Osm</i>      | 1,479602092 | 2,035427776 | 2,168257565 | 2,261873625 | 2,648045233 |
| <i>Qprt</i>     | 1,640748161 | 2,148409669 | 2,369609783 | 2,333905609 | 2,496431349 |
| <i>Irgm2</i>    | 1,55187864  | 2,143651784 | 2,385939754 | 2,257437001 | 2,531644031 |
| <i>Itpk1</i>    | 1,489385537 | 2,060271964 | 2,398026712 | 2,186133663 | 2,491462026 |
| <i>Pag1</i>     | 1,494642538 | 2,094803426 | 2,48578485  | 2,206556494 | 2,485760528 |
| <i>Zadh2</i>    | 1,599964314 | 2,174325699 | 2,334830337 | 2,083007301 | 2,490415889 |
| <i>Usp36</i>    | 1,748625663 | 2,138061685 | 2,333469583 | 2,174068298 | 2,564689602 |
| <i>Adamtsl4</i> | 1,684794442 | 2,077567332 | 2,467448424 | 2,146583332 | 2,410819876 |
| <i>Yeats4</i>   | 1,701374076 | 2,140597988 | 2,462948786 | 2,160533422 | 2,534477589 |
| <i>Ssbp4</i>    | 1,63710395  | 2,022416501 | 2,238498687 | 2,055494358 | 2,536693816 |
| <i>B4galt1</i>  | 1,648155637 | 2,009067811 | 2,185506399 | 2,134864468 | 2,533676683 |
| <i>Mbd6</i>     | 1,573093788 | 1,991254535 | 2,132371222 | 1,963642006 | 2,519770572 |
| <i>Dnm2</i>     | 1,560220593 | 1,95612295  | 2,268851102 | 2,032914538 | 2,403370932 |
| <i>Fbxl14</i>   | 1,663501767 | 1,882610426 | 2,283118873 | 2,06747933  | 2,418977301 |
| <i>Gipc3</i>    | 1,566241916 | 1,777253219 | 2,335978202 | 1,958701059 | 2,655502323 |
| <i>Dnajb1</i>   | 1,701270458 | 2,065410263 | 2,436156791 | 1,86386415  | 2,701761134 |
| <i>Aldoa</i>    | 1,768826824 | 2,155925666 | 2,299695502 | 1,914487396 | 2,576117217 |
| <i>Nbeal2</i>   | 1,638100205 | 2,115404426 | 2,376174022 | 1,993315211 | 2,430465658 |
| <i>Plekhg2</i>  | 1,568155942 | 2,117286705 | 2,471834029 | 1,96250819  | 2,382087516 |



|                      |             |             |             |             |             |
|----------------------|-------------|-------------|-------------|-------------|-------------|
| <i>Cd82</i>          | 1,6057931   | 2,040967428 | 2,248308393 | 1,964719921 | 2,373030376 |
| <i>Gm10804</i>       | 1,577851756 | 2,110526336 | 2,255614205 | 1,898448286 | 2,347388208 |
| <i>O610009L18Rik</i> | 1,425208968 | 2,196394357 | 2,188410915 | 1,777596117 | 2,38061496  |
| <i>Zbtb9</i>         | 1,511997512 | 2,279176939 | 2,201884768 | 1,930251028 | 2,453447227 |
| <i>Mef2d</i>         | 1,495744294 | 2,033126243 | 2,278038933 | 1,993479065 | 2,316747727 |
| <i>Usp7</i>          | 1,433214771 | 2,038225181 | 2,345975435 | 2,031183427 | 2,315936542 |
| <i>Ablim1</i>        | 1,436980702 | 2,041443402 | 2,221242122 | 2,108365213 | 2,320365164 |
| <i>Trim25</i>        | 1,452480822 | 2,029832977 | 2,133345775 | 2,043299843 | 2,432891943 |
| <i>Rassf2</i>        | 1,424284504 | 1,983414362 | 2,185658993 | 2,041521433 | 2,386641424 |
| <i>Ube2v1</i>        | 1,404821226 | 1,988528106 | 2,199897815 | 1,960090268 | 2,591265159 |
| <i>Tubb4a</i>        | 1,334236802 | 2,009240118 | 2,21602817  | 2,056177622 | 2,58219815  |
| <i>Gm10814</i>       | 1,437443971 | 2,191327765 | 2,219774821 | 2,017148751 | 2,621138375 |
| <i>Mogs</i>          | 1,516120082 | 1,938116353 | 2,563463236 | 1,893918838 | 2,610938736 |
| <i>D17H6S53E</i>     | 1,47313052  | 1,930640325 | 2,495855154 | 1,86372129  | 2,412477453 |
| <i>Atp5a1</i>        | 1,277062749 | 1,8441191   | 2,440096167 | 1,990478501 | 2,452311599 |
| <i>Btbd6</i>         | 1,67567949  | 1,993618801 | 2,078695884 | 2,676058018 | 2,509906066 |
| <i>Myl12b</i>        | 1,824170892 | 1,991433177 | 2,267854242 | 2,498304865 | 2,62457907  |
| <i>Trim56</i>        | 1,583149289 | 2,0323431   | 2,07496605  | 2,330343204 | 2,235786833 |
| <i>Setd6</i>         | 1,550299974 | 2,067613728 | 1,985181458 | 2,500943086 | 2,27930389  |
| <i>Calm1</i>         | 1,392762846 | 2,112433576 | 2,081607796 | 2,369660239 | 2,377692503 |
| <i>Stk4</i>          | 1,464295427 | 2,212047779 | 2,406409209 | 2,428313803 | 2,646951127 |
| <i>Ager</i>          | 1,486184579 | 2,18054197  | 2,383379374 | 2,485589739 | 2,608302783 |
| <i>Fyn</i>           | 1,613036904 | 2,322387596 | 2,378467987 | 2,476620574 | 2,607209103 |
| <i>A930015D03Rik</i> | 1,562523491 | 2,289415139 | 2,328893589 | 2,472433961 | 2,433084139 |
| <i>Galnt10</i>       | 1,439945274 | 2,267873191 | 2,345041931 | 2,508543379 | 2,477675312 |
| <i>Sertad1</i>       | 1,665890308 | 2,124847487 | 2,279515079 | 2,552098721 | 2,564947825 |
| <i>H2-Q4</i>         | 1,536863132 | 2,156213395 | 2,245708456 | 2,519818618 | 2,679147209 |
| <i>Fbxl3</i>         | 1,404804643 | 2,134117927 | 2,302884987 | 2,25219098  | 2,574768419 |
| <i>Hsp90ab1</i>      | 1,341421353 | 2,218634555 | 2,255276927 | 2,307018466 | 2,615954731 |
| <i>Gimap8</i>        | 1,514985615 | 2,291056987 | 2,232097643 | 2,317145454 | 2,50927418  |
| <i>Commd8</i>        | 1,589252152 | 2,28538502  | 2,225131079 | 2,303888578 | 2,527070281 |
| <i>Il6ra</i>         | 1,28003303  | 2,262371854 | 2,084881269 | 2,484990631 | 2,734414253 |
| <i>Tspyl3</i>        | 1,409642505 | 2,241812385 | 2,156152137 | 2,532129166 | 2,663371633 |
| <i>Cd47</i>          | 1,242967201 | 2,176121256 | 2,212735917 | 2,579293369 | 2,489454645 |
| <i>Pstpip1</i>       | 1,23389703  | 1,910827637 | 2,297770985 | 2,053576226 | 2,184884306 |
| <i>Gm6793</i>        | 1,184464575 | 1,810028748 | 2,278352118 | 2,085625341 | 2,275461871 |
| <i>Hnrnpa3</i>       | 1,107199769 | 1,746109927 | 2,276672981 | 1,915630009 | 2,142409685 |
| <i>Rbmxl1</i>        | 1,130406187 | 1,86353299  | 2,309415692 | 2,143405811 | 2,032520516 |
| <i>Hnrnpu</i>        | 0,97966924  | 1,8701812   | 2,43407234  | 2,023171224 | 2,162629277 |
| <i>Eif4h</i>         | 0,931044823 | 1,988616497 | 2,369368424 | 2,122377916 | 2,206456134 |
| <i>Gm11346</i>       | 1,158630481 | 1,82009695  | 2,613386494 | 2,034284604 | 1,842806788 |
| <i>Clcf1</i>         | 1,593143733 | 1,837418647 | 2,584393866 | 2,360061717 | 2,327676986 |
| <i>Actg1</i>         | 1,650727276 | 1,918640352 | 2,445502669 | 2,517181047 | 2,301690225 |
| <i>Tspyl1</i>        | 1,437438753 | 1,938343769 | 2,597560983 | 2,421312028 | 2,184764797 |
| <i>Irf7</i>          | 1,513574737 | 1,75222581  | 2,226592105 | 2,668317403 | 2,10682072  |
| <i>Arl6ip4</i>       | 1,618081385 | 1,77061426  | 2,239083102 | 2,466216757 | 2,164572692 |
| <i>Kif23</i>         | 1,354350798 | 2,145192191 | 2,100398776 | 1,815691046 | 1,936830201 |
| <i>Mapk6</i>         | 1,402143977 | 2,083368276 | 2,206156596 | 1,903237532 | 2,027817268 |
| <i>Kcnmb4</i>        | 1,176052718 | 2,16245472  | 2,252277245 | 1,81707825  | 2,035451248 |
| <i>Stk17b</i>        | 1,265054703 | 2,241870085 | 2,019544926 | 1,612006561 | 1,809757271 |
| <i>Lin37</i>         | 1,392748571 | 1,958550308 | 2,078681302 | 2,1092076   | 1,938096601 |

|                      |             |             |             |             |             |
|----------------------|-------------|-------------|-------------|-------------|-------------|
| <i>Runx1</i>         | 1,49158697  | 2,030402096 | 1,954987075 | 2,04512961  | 1,844875526 |
| <i>Lpcat3</i>        | 1,682572705 | 2,067463811 | 2,058268292 | 2,074124526 | 1,974783049 |
| <i>Ccng2</i>         | 1,530235427 | 2,15283069  | 2,064304817 | 2,06522676  | 2,001361667 |
| <i>Gm5069</i>        | 1,539705533 | 2,139379017 | 1,882105504 | 1,921936861 | 1,800186082 |
| <i>1810026B05Rik</i> | 1,50368163  | 2,196252787 | 2,038537602 | 1,903049427 | 1,717766913 |
| <i>Cap1</i>          | 1,147881451 | 1,811839687 | 2,080924165 | 1,851669338 | 2,058068664 |
| <i>Dlg4</i>          | 1,168643931 | 1,873463033 | 2,077349044 | 1,826253427 | 2,094520402 |
| <i>Usp10</i>         | 1,195391075 | 1,903537552 | 2,055861623 | 1,887405649 | 2,10088408  |
| <i>Sppl3</i>         | 1,198851835 | 1,866672011 | 2,036758727 | 1,894577033 | 2,160814787 |
| <i>Nfkb1</i>         | 1,14352436  | 1,932499969 | 2,00628983  | 1,812945836 | 2,078562447 |
| <i>Ppp1r18</i>       | 1,128924403 | 1,985653526 | 2,157386225 | 1,952877442 | 2,07941005  |
| <i>Smad4</i>         | 1,103609163 | 1,845407068 | 1,992816227 | 1,971587724 | 2,164674149 |
| <i>Rnf114</i>        | 1,220411792 | 1,785632871 | 2,036286536 | 1,972839335 | 2,069165815 |
| <i>Card11</i>        | 1,364980075 | 1,893391574 | 2,036015097 | 2,049710557 | 2,157534168 |
| <i>Tspan14</i>       | 1,29957965  | 1,910146905 | 2,025058247 | 2,01653117  | 2,138982856 |
| <i>Max</i>           | 1,272833959 | 1,919089143 | 2,089594994 | 2,094471601 | 2,149578127 |
| <i>Tctn1</i>         | 1,306286808 | 1,831719713 | 2,080830975 | 1,954891    | 2,152234945 |
| <i>Ccdc64</i>        | 1,283531083 | 1,871523025 | 2,169235458 | 1,987092952 | 2,103190886 |
| <i>Sash3</i>         | 1,321322959 | 2,026590499 | 2,157186671 | 1,965557498 | 2,112700133 |
| <i>2310015A10Rik</i> | 1,336921407 | 2,01327844  | 2,169968263 | 1,98798587  | 2,194633496 |
| <i>Spred2</i>        | 1,366608902 | 2,004633791 | 2,06543582  | 2,00162565  | 2,153027878 |
| <i>Tex2</i>          | 1,338244887 | 1,972089828 | 2,017382643 | 1,959967733 | 2,041828954 |
| <i>Mypop</i>         | 1,216843133 | 2,032153979 | 1,991230548 | 2,015710966 | 2,118725916 |
| <i>Itgal</i>         | 1,341227045 | 1,953853944 | 2,062237254 | 1,796514406 | 1,983144517 |
| <i>Coq10a</i>        | 1,265037055 | 1,997743439 | 2,034757967 | 1,846341918 | 2,008488045 |
| <i>Ikzf4</i>         | 1,327028736 | 2,016159366 | 2,064324994 | 1,692381354 | 2,073059451 |
| <i>Ggta1</i>         | 1,404382069 | 1,976781979 | 1,989988217 | 1,806266639 | 2,028732574 |
| <i>Srrt</i>          | 1,447714533 | 1,979485885 | 1,929463115 | 1,787254199 | 2,149969107 |
| <i>Acap1</i>         | 1,185126056 | 1,686397862 | 2,068699582 | 1,844761373 | 2,108659282 |
| <i>Fem1c</i>         | 1,187844765 | 1,680862414 | 2,089770749 | 1,737512452 | 2,043793003 |
| <i>Sp100</i>         | 1,206195506 | 1,808231219 | 2,011180343 | 1,793494384 | 1,968600162 |
| <i>Mbnl2</i>         | 1,238728256 | 1,823985335 | 2,022647473 | 1,774761973 | 2,067297724 |
| <i>Git2</i>          | 1,238933729 | 1,742293881 | 1,893089412 | 1,76728498  | 2,040514462 |
| <i>Mark2</i>         | 1,371005523 | 1,731271071 | 1,927816199 | 1,777683716 | 2,071552536 |
| <i>Naca</i>          | 1,283037751 | 1,7838586   | 2,024464339 | 1,685029139 | 2,133204173 |
| <i>Dtx2</i>          | 1,4122948   | 1,805600679 | 2,106979555 | 1,745011348 | 1,978349545 |
| <i>Leng9</i>         | 1,279890687 | 1,709818879 | 2,146799987 | 1,775118274 | 1,932595887 |
| <i>Ppia</i>          | 1,073152574 | 1,916578738 | 2,02258024  | 1,769231908 | 1,937289015 |
| <i>Ywhah</i>         | 1,081773822 | 1,791376174 | 2,13667329  | 1,77516433  | 1,924317723 |
| <i>Tesc</i>          | 1,113644538 | 1,895263713 | 2,038200098 | 1,948232311 | 1,958646326 |
| <i>Gm20324</i>       | 1,156148018 | 1,900574387 | 2,073487327 | 1,906168329 | 1,839183924 |
| <i>Plekhf2</i>       | 1,442065617 | 2,141140875 | 1,992884552 | 2,110887284 | 2,206306326 |
| <i>Zfp260</i>        | 1,477347168 | 2,047463607 | 2,099034212 | 2,138392736 | 2,146012843 |
| <i>Hivep2</i>        | 1,430361829 | 2,201911772 | 2,115758531 | 2,021782989 | 2,079629551 |
| <i>Gm15401</i>       | 1,544456773 | 2,248420344 | 2,058237545 | 1,966847218 | 2,116984036 |
| <i>Fmnl3</i>         | 1,364406632 | 2,153139596 | 2,129714426 | 2,093542307 | 2,051375194 |
| <i>Lmbr1l</i>        | 1,362913167 | 2,066733208 | 2,155996163 | 2,081202521 | 2,041224133 |
| <i>Tgif2</i>         | 1,277155059 | 2,210692453 | 2,13186522  | 2,127404314 | 1,989654208 |
| <i>Klhl25</i>        | 1,246992474 | 2,245519091 | 2,129851025 | 2,101952951 | 2,324221279 |
| <i>Cd274</i>         | 1,169021491 | 2,279816719 | 2,212068758 | 1,966071318 | 2,31923118  |
| <i>Rassf5</i>        | 1,422058481 | 2,226604011 | 2,315747128 | 2,09439589  | 2,208503515 |

|                      |             |             |             |             |             |
|----------------------|-------------|-------------|-------------|-------------|-------------|
| <i>Gm12250</i>       | 1,361944327 | 2,138496244 | 2,294354593 | 2,045201455 | 2,337730142 |
| <i>Gabarap</i>       | 1,556126586 | 2,022857874 | 1,865016024 | 1,672939293 | 2,245338796 |
| <i>Gm5083</i>        | 1,429871401 | 2,022889518 | 1,642758446 | 1,728994045 | 2,110276967 |
| <i>Ppan</i>          | 1,217603222 | 2,033928909 | 1,893230528 | 1,643772681 | 2,229137556 |
| <i>Rnf208</i>        | 1,416136374 | 1,977738296 | 1,600223955 | 1,880584486 | 2,521995458 |
| <i>1700016K19Rik</i> | 1,320291352 | 1,995032129 | 1,855314936 | 1,727554649 | 2,55252972  |
| <i>Plk3</i>          | 1,275821308 | 2,086000586 | 1,569855608 | 1,980691367 | 2,132944949 |
| <i>Zbtb25</i>        | 1,695021008 | 1,93965932  | 2,052417233 | 1,72926743  | 2,072743897 |
| <i>2510012J08Rik</i> | 1,7008773   | 1,925767745 | 2,046789929 | 1,831422371 | 2,100755004 |
| <i>Dzip1</i>         | 1,562036721 | 2,036970218 | 2,025491995 | 1,793987476 | 2,090207039 |
| <i>Khdrbs1</i>       | 1,589435587 | 1,959764899 | 2,092685069 | 1,821253621 | 2,039916288 |
| <i>Kcnip2</i>        | 1,551619285 | 1,861561959 | 2,071608983 | 1,845530354 | 2,027067615 |
| <i>A630001G21Rik</i> | 1,532368284 | 1,8631615   | 2,142552337 | 1,746355065 | 2,098561172 |
| <i>Obfc1</i>         | 1,862135723 | 1,872503772 | 2,020193259 | 1,762724039 | 2,051258325 |
| <i>Arid3b</i>        | 1,808296199 | 1,825231389 | 2,001546035 | 1,831403629 | 2,048676669 |
| <i>Fkbp5</i>         | 1,825567133 | 1,957011148 | 2,061163863 | 1,841189913 | 2,099646276 |
| <i>Hipk1</i>         | 1,868256228 | 1,928580006 | 1,994360659 | 1,874999325 | 2,083013207 |
| <i>Kctd17</i>        | 1,786188717 | 1,917136567 | 2,168553704 | 1,8037577   | 2,052777058 |
| <i>Setd7</i>         | 1,842988665 | 1,87015911  | 2,138463356 | 1,797781971 | 2,176331748 |
| <i>Nr1d1</i>         | 1,822226996 | 1,761277817 | 2,084062906 | 1,664954001 | 2,285213804 |
| <i>Mical1</i>        | 1,883392429 | 1,730448485 | 1,990971863 | 1,720636113 | 2,355892931 |
| <i>Mxra8</i>         | 1,639363424 | 1,753707539 | 1,917363301 | 1,822985332 | 2,40227263  |
| <i>Rltpr</i>         | 1,61120737  | 1,751534667 | 1,977255291 | 1,815862903 | 2,340710513 |
| <i>Smarcd2</i>       | 1,869706597 | 1,814976129 | 1,824795661 | 1,851916697 | 2,221854513 |
| <i>Evi2a</i>         | 1,849931366 | 1,834607576 | 1,938726154 | 1,913649003 | 2,306693655 |
| <i>Gm996</i>         | 1,44224654  | 1,760920817 | 2,046558147 | 1,970291313 | 2,142044301 |
| <i>Dnajc7</i>        | 1,495490922 | 1,824414086 | 2,0040488   | 1,914570039 | 2,169279956 |
| <i>Prr13</i>         | 1,457398118 | 1,707915041 | 1,991420681 | 1,926420575 | 2,239234757 |
| <i>Chd4</i>          | 1,420609383 | 1,731590649 | 1,878937825 | 1,864326094 | 2,138324442 |
| <i>Itpr3</i>         | 1,424489471 | 1,710069895 | 1,866462566 | 1,877583967 | 2,172970197 |
| <i>Pacs2</i>         | 1,595872721 | 1,716364201 | 2,012223864 | 1,790399157 | 2,110082954 |
| <i>Iffo1</i>         | 1,602690138 | 1,732305454 | 1,899793278 | 1,838090369 | 2,064221109 |
| <i>Os9</i>           | 1,510254206 | 1,758929974 | 1,894385718 | 1,707557604 | 2,120851654 |
| <i>Derl1</i>         | 1,618119276 | 1,873330509 | 2,168509352 | 1,951767395 | 2,216291684 |
| <i>Erf</i>           | 1,608209319 | 1,78437741  | 2,104052539 | 1,919333161 | 2,189905235 |
| <i>Pik3r5</i>        | 1,658532208 | 1,8094372   | 1,966016696 | 1,99051116  | 2,242341828 |
| <i>Tspan13</i>       | 1,445709784 | 1,916795216 | 2,017196446 | 1,922804947 | 2,118372598 |
| <i>Sigirr</i>        | 1,487608834 | 1,910246889 | 1,962450351 | 2,000323614 | 2,150964682 |
| <i>Coro1c</i>        | 1,479576008 | 1,913852873 | 2,069062999 | 2,064856096 | 2,197722354 |
| <i>Traf3ip3</i>      | 1,495552534 | 1,874304671 | 2,011644424 | 2,09024191  | 2,139126756 |
| <i>Gng3</i>          | 1,741900332 | 1,608602743 | 2,428607843 | 2,060738175 | 2,240681156 |
| <i>Spn</i>           | 1,556092285 | 1,612602223 | 2,273987336 | 2,225129678 | 2,223703214 |
| <i>Klf16</i>         | 1,889052307 | 1,710764627 | 2,230852652 | 1,960542845 | 2,194070037 |
| <i>Plekhg6</i>       | 1,690392011 | 1,625075414 | 2,19624385  | 1,872524148 | 2,088885237 |
| <i>Kiss1r</i>        | 1,558081881 | 1,622036661 | 2,35956268  | 2,125852803 | 2,011479352 |
| <i>Aup1</i>          | 1,520319057 | 1,742797429 | 2,473405268 | 1,9812136   | 2,05849322  |
| <i>Wbp1</i>          | 1,447798126 | 1,837728864 | 2,373652977 | 2,100115808 | 2,200422685 |
| <i>Lrch4</i>         | 1,401306051 | 1,832693017 | 2,249514904 | 2,08629544  | 2,138506156 |
| <i>Rab11fip1</i>     | 1,289635641 | 1,974862373 | 2,229230939 | 1,791882684 | 2,283961972 |
| <i>Anp32b</i>        | 1,18561646  | 1,882186217 | 2,157125844 | 1,834781394 | 2,244941697 |
| <i>Gtpbp2</i>        | 1,238950168 | 1,798036718 | 2,164760416 | 1,555318479 | 2,363911928 |

|                      |             |             |             |             |             |
|----------------------|-------------|-------------|-------------|-------------|-------------|
| <i>Gm10390</i>       | 1,576504183 | 1,665351356 | 2,298281643 | 1,602527224 | 2,294310272 |
| <i>Bri3bp</i>        | 1,644399544 | 1,693255483 | 2,153159971 | 1,680273853 | 2,183097744 |
| <i>Klhdc5</i>        | 1,474751623 | 1,66826755  | 2,086046886 | 1,72600447  | 2,185130479 |
| <i>Calhm2</i>        | 1,551265494 | 1,756083275 | 2,08495386  | 1,670824552 | 2,153703735 |
| <i>Dennd1c</i>       | 1,438281663 | 1,688935984 | 2,174811674 | 1,642516568 | 2,098697241 |
| <i>Sgpp1</i>         | 1,387804478 | 1,879600845 | 2,021063987 | 2,005249735 | 2,258376926 |
| <i>Lrrc33</i>        | 1,304943643 | 1,920447407 | 2,004385651 | 1,905490388 | 2,310443767 |
| <i>Rnaset2b</i>      | 1,449446566 | 1,962587631 | 2,015221295 | 1,81792695  | 2,308301454 |
| <i>Rnaset2a</i>      | 1,449461979 | 1,962607531 | 2,013851096 | 1,826242488 | 2,308323365 |
| <i>Znrf2</i>         | 1,271496943 | 1,857993075 | 2,087078441 | 2,009467256 | 2,402233447 |
| <i>Clic1</i>         | 1,361992274 | 1,922363447 | 2,175288889 | 1,931521919 | 2,489229025 |
| <i>Slc38a1</i>       | 1,382157971 | 1,69529383  | 2,046214091 | 1,952691465 | 2,416183667 |
| <i>Actn1</i>         | 1,466684411 | 1,675280815 | 2,074006599 | 1,988539815 | 2,431235019 |
| <i>Arhgdia</i>       | 1,546958198 | 1,785115191 | 1,964772198 | 1,982862269 | 2,44776847  |
| <i>Fam83f</i>        | 1,68289062  | 1,972232729 | 2,20774423  | 1,844584342 | 2,210108735 |
| <i>Cend1</i>         | 1,664214908 | 1,907955808 | 2,058913527 | 1,816645934 | 2,241550238 |
| <i>Ehd3</i>          | 1,793233338 | 2,048291845 | 2,07879193  | 1,767379273 | 2,279108143 |
| <i>Wdr6</i>          | 1,817374793 | 1,904351271 | 2,297291845 | 1,789482369 | 2,239188267 |
| <i>Hn1</i>           | 1,710768239 | 1,865074857 | 2,300301287 | 1,765974849 | 2,305835881 |
| <i>Mex3a</i>         | 1,767348709 | 2,102015256 | 2,2885658   | 1,744436017 | 2,200035531 |
| <i>Kcnk7</i>         | 1,759630573 | 2,142331904 | 2,359888763 | 1,803851508 | 2,21747645  |
| <i>Fyb</i>           | 1,50682274  | 2,066290136 | 2,206098079 | 1,939324334 | 2,209533687 |
| <i>Foxo3</i>         | 1,426705478 | 1,952427993 | 2,201347682 | 1,875447325 | 2,225800817 |
| <i>Lpar2</i>         | 1,495537094 | 2,001025195 | 2,25209904  | 1,746599013 | 2,127467512 |
| <i>C030046I01Rik</i> | 1,555575654 | 1,877058527 | 2,208253419 | 1,787567664 | 2,406595158 |
| <i>Jmjd6</i>         | 1,581699579 | 1,844628448 | 2,192244768 | 1,871566187 | 2,364788549 |
| <i>Ppp2cb</i>        | 1,444101191 | 1,84059668  | 2,187532492 | 1,802298582 | 2,36063905  |
| <i>Hspb6</i>         | 1,827977491 | 2,017122531 | 2,106404534 | 1,483095312 | 2,245069671 |
| <i>AW112010</i>      | 1,524453995 | 1,969770483 | 2,041075748 | 1,427107734 | 2,396064197 |
| <i>Traf4</i>         | 1,680199562 | 1,862218934 | 2,446679355 | 1,782953619 | 2,434808601 |
| <i>Mast3</i>         | 1,658686733 | 1,876166444 | 2,406375235 | 1,720529296 | 2,409269106 |
| <i>Cenpb</i>         | 1,72051261  | 1,842673155 | 2,311396183 | 1,64119731  | 2,61367476  |
| <i>Mnt</i>           | 1,468776189 | 1,658441681 | 2,374070364 | 1,571914448 | 2,548712232 |
| <i>Rab27a</i>        | 1,61760886  | 1,931455372 | 1,961616393 | 2,084145072 | 2,140739857 |
| <i>4933426D04Rik</i> | 1,727547903 | 1,837842757 | 1,919585834 | 2,163019857 | 2,061848555 |
| <i>Il3ra</i>         | 1,783119796 | 1,725208022 | 1,69418398  | 1,975296153 | 2,10700803  |
| <i>Ckb</i>           | 1,809715078 | 1,773827749 | 1,789953353 | 2,333122656 | 1,957935165 |
| <i>Fkbpl</i>         | 1,690882022 | 2,000912598 | 1,630354043 | 2,197888804 | 2,08995651  |
| <i>Sssca1</i>        | 1,658394105 | 1,660529614 | 1,854511796 | 2,161873586 | 2,229167877 |
| <i>Rassf3</i>        | 1,612195747 | 1,771404975 | 1,774536329 | 2,276028071 | 2,232033029 |
| <i>Fam108a</i>       | 1,568177019 | 1,669364007 | 1,862522075 | 2,13221658  | 2,440638081 |
| <i>Bhlha15</i>       | 1,563350742 | 1,932653006 | 1,791470807 | 2,31395765  | 2,352891041 |
| <i>Tmub1</i>         | 1,337082662 | 1,373522848 | 1,910342338 | 2,506525096 | 1,947950279 |
| <i>Endog</i>         | 1,414924803 | 1,523362877 | 1,599292479 | 2,562165715 | 1,770734672 |
| <i>Rps8</i>          | 1,54452783  | 1,736961569 | 2,019367584 | 2,599123588 | 2,635686399 |
| <i>2900092E17Rik</i> | 1,611104644 | 1,507956604 | 1,864792641 | 2,710001405 | 2,392327102 |
| <i>1700066B17Rik</i> | 1,322570319 | 1,623137648 | 2,048193787 | 2,067860865 | 2,125947356 |
| <i>Amigo3</i>        | 1,330304525 | 1,629494852 | 1,882093648 | 2,075726927 | 2,1379343   |
| <i>Klhl35</i>        | 1,368876675 | 1,796452646 | 1,906918973 | 2,151533227 | 2,218218927 |
| <i>Ttyh3</i>         | 1,375099741 | 1,771486868 | 1,837854848 | 2,14373563  | 2,147865464 |
| <i>Arhgef4</i>       | 1,38490571  | 1,865872741 | 1,988504051 | 2,215715863 | 2,244863113 |

|                      |             |             |             |             |              |
|----------------------|-------------|-------------|-------------|-------------|--------------|
| <i>Rps6ka1</i>       | 1,370181001 | 1,799035959 | 2,050814612 | 2,15086015  | 2,335132087  |
| <i>Dapk3</i>         | 1,422362694 | 1,707487929 | 2,045375489 | 2,176814202 | 2,231759507  |
| <i>Prkag1</i>        | 1,155521724 | 1,808686698 | 1,88222154  | 2,181259018 | 2,26893797   |
| <i>Sphk2</i>         | 1,115579341 | 1,731151149 | 1,872730824 | 2,081213107 | 2,400146862  |
| <i>Kctd10</i>        | 1,213138357 | 1,662413703 | 1,88978416  | 2,236106802 | 2,332144173  |
| <i>Rad9</i>          | 1,211500023 | 1,668635798 | 1,990186031 | 2,242181812 | 2,248071468  |
| <i>Rabggtb</i>       | 1,178636416 | 1,591564765 | 1,873973756 | 2,201331761 | 2,211935845  |
| <i>Tuba1a</i>        | 1,161322469 | 1,787020024 | 1,854151717 | 1,84009273  | 2,275636078  |
| <i>Gga1</i>          | 1,2305244   | 1,785028372 | 1,948532896 | 1,882338195 | 2,390987756  |
| <i>Pea15a</i>        | 1,070805236 | 1,781619236 | 1,911715243 | 1,846491776 | 2,423422371  |
| <i>Yod1</i>          | 1,2038363   | 1,716191112 | 1,898829158 | 1,882539484 | 2,241179215  |
| <i>Snx32</i>         | 1,219744582 | 1,70208659  | 1,862250555 | 1,895221816 | 2,257532747  |
| <i>Tmpo</i>          | 1,237584185 | 1,660073398 | 1,891316166 | 1,955996445 | 2,176203474  |
| <i>Fut11</i>         | 1,287895077 | 1,807279532 | 1,840569849 | 1,990505459 | 2,198766261  |
| <i>Rab21</i>         | 0,968553737 | 1,665096456 | 1,940018885 | 1,9543115   | 2,235170637  |
| <i>Tapbp</i>         | 1,055720155 | 1,701044197 | 1,911726122 | 1,928559308 | 2,241699453  |
| <i>Csnk1g2</i>       | 1,010735802 | 1,622377227 | 1,908691759 | 1,860183187 | 2,242978069  |
| <i>Ss18</i>          | 1,0025823   | 1,635174203 | 1,93799299  | 1,854673218 | 2,257159136  |
| <i>Rbm14</i>         | 1,047923846 | 1,625333477 | 2,007571873 | 1,995090761 | 2,258695484  |
| <i>Wipf2</i>         | 1,072614079 | 1,640894367 | 1,999628027 | 1,839443262 | 2,273631571  |
| <i>Mmd</i>           | 1,060993773 | 1,733419407 | 2,013707312 | 1,79125903  | 2,224446362  |
| <i>Mcart1</i>        | 1,199253955 | 1,641826529 | 1,965225479 | 1,86108358  | 2,131673733  |
| <i>Tmppe</i>         | 1,116058461 | 1,651057884 | 1,947686151 | 1,893605674 | 2,179033424  |
| <i>D4Ertd22e</i>     | 1,178792884 | 1,597097905 | 2,024596222 | 1,964856522 | 2,165066976  |
| <i>Cdk4</i>          | 1,330193467 | 1,808610672 | 2,092014763 | 1,979310333 | 2,735639044  |
| <i>Gale</i>          | 1,342506675 | 1,801105845 | 1,887853667 | 2,122466623 | 2,67814505   |
| <i>Phf23</i>         | 1,363054187 | 1,604823735 | 1,891940569 | 1,856615819 | 2,631493541  |
| <i>Prr7</i>          | 1,185462462 | 1,609307882 | 1,889468603 | 2,074803877 | 2,511164263  |
| <i>Ppm1m</i>         | 1,232659654 | 1,691281672 | 1,905490826 | 2,137451405 | 2,5744440078 |
| <i>Adcy7</i>         | 1,283294351 | 1,714124748 | 1,986763068 | 2,037060424 | 2,518864211  |
| <i>Rps10</i>         | 1,235936657 | 1,602517077 | 2,045024201 | 2,169225874 | 2,708872136  |
| <i>Dcaf15</i>        | 1,380521954 | 1,587461701 | 2,152233633 | 1,876739906 | 2,428620065  |
| <i>4632428N05Rik</i> | 1,351881295 | 1,524496382 | 2,217406606 | 1,92043855  | 2,53298287   |
| <i>Plekho1</i>       | 1,195935554 | 1,625296326 | 2,221958979 | 1,841930542 | 2,612672769  |
| <i>Lsm4</i>          | 1,377803064 | 1,560753574 | 2,404933797 | 1,851302267 | 2,430456928  |
| <i>Dynll1</i>        | 1,324981079 | 1,585254722 | 2,430425335 | 1,874019798 | 2,418652613  |
| <i>Rps17</i>         | 1,437694305 | 1,24164765  | 2,149611465 | 2,111492677 | 2,543832544  |
| <i>Irgc1</i>         | 0,738640166 | 1,56167136  | 1,645431861 | 2,203023517 | 2,41158886   |
| <i>Snx20</i>         | 0,856654404 | 1,782066352 | 1,68394636  | 2,094345646 | 2,471185353  |
| <i>Atf4</i>          | 0,977169204 | 1,84321441  | 1,607975536 | 2,347167953 | 2,336010956  |
| <i>1500002O20Rik</i> | 1,130963428 | 1,445111027 | 1,608884711 | 2,272639336 | 2,392562393  |
| <i>Gm10094</i>       | 1,133084957 | 1,450388513 | 1,627496799 | 2,229441834 | 2,362040923  |
| <i>Rgl2</i>          | 1,16596795  | 1,611397705 | 1,589958277 | 2,129920507 | 2,215211762  |
| <i>Ddx39</i>         | 1,086919034 | 1,536518619 | 1,75670947  | 2,235061319 | 2,617353008  |
| <i>Fut7</i>          | 1,150390739 | 1,467423874 | 1,791678922 | 2,525220733 | 2,407153594  |
| <i>Sh3bp1</i>        | 1,039583725 | 1,921073872 | 2,120858543 | 2,183104091 | 2,386179519  |
| <i>Fam53b</i>        | 1,046314759 | 1,947590125 | 2,118150821 | 2,121908407 | 2,280244852  |
| <i>Calm2</i>         | 1,060493473 | 1,947814476 | 2,182762082 | 2,29375613  | 2,33015093   |
| <i>Brd2</i>          | 1,036722422 | 1,955633522 | 2,144663424 | 2,288638387 | 2,340413621  |
| <i>Foxp1</i>         | 0,988997518 | 2,016388784 | 2,154808985 | 2,249053749 | 2,375654384  |
| <i>Sec11a</i>        | 1,07048304  | 2,124322969 | 2,061759701 | 2,167298368 | 2,338088544  |

|                      |             |             |             |             |             |
|----------------------|-------------|-------------|-------------|-------------|-------------|
| <i>Fam49b</i>        | 0,979715729 | 2,001952033 | 2,144936096 | 2,067269689 | 2,416889923 |
| <i>Rhoa</i>          | 0,876643961 | 1,92913623  | 2,146321383 | 2,092761327 | 2,339701346 |
| <i>Srsf7</i>         | 0,976687424 | 1,992294969 | 2,19097863  | 2,032851688 | 2,29664428  |
| <i>Sbf1</i>          | 1,01636845  | 1,992952658 | 2,240995725 | 2,080188433 | 2,297046186 |
| <i>Map3k11</i>       | 1,150609559 | 2,006483585 | 2,039339547 | 2,012815332 | 2,424590298 |
| <i>Emb</i>           | 1,166025601 | 1,922164683 | 2,065301202 | 2,125621923 | 2,371481094 |
| <i>Atf7ip</i>        | 1,245774856 | 2,005336026 | 2,22906409  | 2,062611738 | 2,357094487 |
| <i>Anapc16</i>       | 1,240952208 | 1,96188939  | 2,1977029   | 2,062780457 | 2,376194177 |
| <i>Prrc2a</i>        | 1,264079654 | 2,032737427 | 2,198078913 | 2,062449454 | 2,440680565 |
| <i>Wipf1</i>         | 1,233321773 | 2,054698748 | 2,156200596 | 1,971121555 | 2,306835875 |
| <i>Bcor</i>          | 1,204458192 | 2,008209493 | 2,151781412 | 2,042903476 | 2,312103704 |
| <i>Vav1</i>          | 1,158183567 | 1,995027765 | 2,198306524 | 1,977339308 | 2,248653461 |
| <i>Gmfb</i>          | 1,115577774 | 2,037077824 | 2,262716801 | 2,107074782 | 2,459157978 |
| <i>Bcl3</i>          | 1,087403232 | 2,116807317 | 2,367642671 | 2,096338883 | 2,47260724  |
| <i>Dyrk1a</i>        | 1,212029852 | 2,079621837 | 2,34055381  | 2,065107925 | 2,412329014 |
| <i>Arhgef2</i>       | 1,115144012 | 2,138551033 | 2,398918533 | 2,043062363 | 2,603078771 |
| <i>Arl6ip5</i>       | 1,142904678 | 1,859842264 | 2,339839707 | 1,994687394 | 2,596382882 |
| <i>Arpc1b</i>        | 1,107385672 | 1,89988514  | 2,232801104 | 2,107497254 | 2,660037353 |
| <i>Hnrnpk</i>        | 1,0152007   | 1,817950103 | 2,279933059 | 2,086870777 | 2,524887632 |
| <i>Sema4a</i>        | 1,057565897 | 1,809965207 | 2,205536954 | 1,857318356 | 2,472136006 |
| <i>Mtap7d1</i>       | 1,109148756 | 1,762779    | 2,300088644 | 1,860251816 | 2,445587292 |
| <i>Zfp574</i>        | 1,127851722 | 1,731651541 | 2,137670095 | 1,819603683 | 2,430012732 |
| <i>Slc44a2</i>       | 1,052118086 | 1,759208776 | 2,263688796 | 1,995444032 | 2,373908589 |
| <i>Bcl10</i>         | 0,817221109 | 1,82554822  | 2,37757009  | 1,8738724   | 2,495230128 |
| <i>2610524H06Rik</i> | 1,282911473 | 1,575142918 | 2,353223583 | 2,25904301  | 2,440403177 |
| <i>Tdgf1</i>         | 0,978794412 | 1,639272344 | 2,518068236 | 2,25465321  | 2,282375778 |
| <i>Oaz1-ps</i>       | 1,010938719 | 1,550912595 | 2,437510364 | 2,012446353 | 2,623186856 |
| <i>Oaz1</i>          | 1,082733543 | 1,564432642 | 2,438598475 | 2,072578889 | 2,640232596 |
| <i>Atp1b3</i>        | 1,113737228 | 1,932634832 | 2,288342758 | 2,379285219 | 2,683026377 |
| <i>Stat1</i>         | 1,098592277 | 1,978278667 | 2,384938398 | 2,413090258 | 2,672767238 |
| <i>Atn1</i>          | 1,081829217 | 2,031184234 | 2,407413571 | 2,335528849 | 2,56605788  |
| <i>H3f3a</i>         | 1,027635413 | 2,083412566 | 2,348759943 | 2,204693585 | 2,758009629 |
| <i>Lysmd1</i>        | 1,082223114 | 2,098716442 | 2,329605982 | 2,12436275  | 2,761522806 |
| <i>Prkar1a</i>       | 1,220549326 | 2,166331671 | 2,486650325 | 2,356441203 | 2,659223662 |
| <i>Mllt6</i>         | 1,208485003 | 2,273605783 | 2,433406572 | 2,269157103 | 2,710915461 |
| <i>Rasal3</i>        | 1,131819545 | 2,242044833 | 2,275651627 | 2,325696235 | 2,674972338 |
| <i>Ctnnb1</i>        | 1,14425083  | 2,116751826 | 2,446401122 | 2,279941431 | 2,458698681 |
| <i>Mbnl1</i>         | 1,166602531 | 2,175656211 | 2,458908414 | 2,304676943 | 2,537012516 |
| <i>Adnp</i>          | 1,135607201 | 2,174818246 | 2,552642964 | 2,381490085 | 2,54469969  |
| <i>Srsf5</i>         | 1,028327436 | 2,052741059 | 2,118210033 | 2,272672799 | 2,867914316 |
| <i>Cdipt</i>         | 0,974987948 | 2,214720891 | 2,047308315 | 2,2906231   | 2,69123283  |
| <i>Surf1</i>         | 1,183901431 | 1,953326169 | 2,430987784 | 2,353845029 | 2,91317392  |
| <i>Rps26</i>         | 0,925151154 | 1,847904993 | 2,427340463 | 2,276723475 | 2,876031861 |
| <i>1110008F13Rik</i> | 1,257987265 | 1,927743585 | 2,486276055 | 2,188425221 | 2,758687911 |
| <i>Rpl7a</i>         | 1,219830464 | 1,705563751 | 2,408035122 | 2,196718589 | 2,750825086 |
| <i>Itgb7</i>         | 1,038212091 | 1,677915447 | 2,321399037 | 2,399961817 | 2,700579348 |
| <i>Rasgrp2</i>       | 1,179583663 | 1,742046684 | 2,321001115 | 2,540777143 | 2,82184178  |
| <i>Tagln2</i>        | 1,312523202 | 1,516523474 | 2,418532295 | 2,223917851 | 2,86533685  |
| <i>H2-Q5</i>         | 1,115187198 | 1,485383017 | 2,299905611 | 2,22093611  | 3,676591747 |
| <i>Cuta</i>          | 1,320296659 | 1,839669667 | 2,176821942 | 1,909676524 | 3,285515401 |
| <i>Slc26a10</i>      | 0,863136994 | 1,831458254 | 2,29396973  | 1,942205351 | 3,033278326 |

|                      |             |             |             |             |             |
|----------------------|-------------|-------------|-------------|-------------|-------------|
| <i>Ptgds</i>         | 1,748217133 | 1,634959384 | 2,221445948 | 2,022536129 | 2,974714511 |
| <i>H2afj</i>         | 2,115867716 | 1,626703842 | 2,579365094 | 2,015477444 | 2,95574273  |
| <i>C130039O16Rik</i> | 1,537146561 | 1,904623455 | 2,537958947 | 2,227161638 | 3,041248934 |
| <i>Fibp</i>          | 1,484264125 | 1,831518945 | 2,696917924 | 2,026163393 | 3,254791667 |
| <i>Rps14</i>         | 1,627116193 | 1,916295426 | 2,408581877 | 1,981049647 | 2,956371897 |
| <i>Mocs3</i>         | 1,611995448 | 1,2540303   | 2,851393591 | 2,037308202 | 2,702696719 |
| <i>Runx3</i>         | 1,480681186 | 1,780406876 | 3,152912047 | 1,828986932 | 3,261900746 |
| <i>Cldnd2</i>        | 1,133358455 | 1,707880479 | 2,878822963 | 1,54372384  | 3,378942705 |
| <i>Dnajb12</i>       | 2,037724517 | 2,067592321 | 2,395466273 | 1,989538776 | 2,52270638  |
| <i>Zfp957</i>        | 1,914977395 | 2,046961656 | 2,628594762 | 1,907010159 | 2,4956406   |
| <i>Atp1b1</i>        | 1,808248277 | 2,005680931 | 2,40341372  | 2,080200869 | 2,431686496 |
| <i>Sh3gl1</i>        | 1,791828119 | 2,058477818 | 2,414122243 | 2,084017539 | 2,477282421 |
| <i>Abtb2</i>         | 1,857663515 | 2,208510818 | 2,500245192 | 2,125784176 | 2,364565253 |
| <i>Egfl8</i>         | 1,954856878 | 2,429212034 | 2,450470348 | 1,944711046 | 2,23220977  |
| <i>Zscan2</i>        | 1,941945415 | 2,465394156 | 2,437449223 | 1,953642487 | 2,382194849 |
| <i>Lsm14b</i>        | 1,9943609   | 2,290854662 | 2,337097194 | 1,843362246 | 2,291973721 |
| <i>Tmem185b</i>      | 2,185150839 | 2,005935992 | 2,447311606 | 1,75394311  | 2,569600933 |
| <i>Ydjc</i>          | 2,122623127 | 2,389836672 | 2,186665054 | 1,605703064 | 2,499552732 |
| <i>Fli1</i>          | 1,805007316 | 2,028213694 | 2,250216396 | 1,977055331 | 2,209109264 |
| <i>Cnot2</i>         | 1,753365604 | 2,075950384 | 2,24464005  | 1,933908329 | 2,183754516 |
| <i>Sox15</i>         | 1,867230925 | 2,024940222 | 2,211822679 | 2,033615822 | 2,243064274 |
| <i>Msh6</i>          | 1,81122461  | 2,016273663 | 2,343807399 | 2,019218575 | 2,227614227 |
| <i>Cd164</i>         | 1,822496653 | 1,997899525 | 2,35763025  | 2,126185242 | 2,270311879 |
| <i>Tmie</i>          | 1,769305218 | 2,060273922 | 2,407848728 | 1,990262442 | 2,303105815 |
| <i>Uba7</i>          | 1,830221999 | 1,925689016 | 2,223279601 | 2,09043715  | 2,333919066 |
| <i>Timp2</i>         | 1,762113666 | 1,964758651 | 2,288831526 | 2,009462742 | 2,401801803 |
| <i>Sipa1</i>         | 1,813987142 | 2,113285664 | 2,256855176 | 2,100599297 | 2,39670819  |
| <i>Rcsd1</i>         | 1,743169214 | 2,098154834 | 2,171530641 | 2,174558866 | 2,431422266 |
| <i>Sell</i>          | 1,834694345 | 1,973988117 | 2,148107226 | 1,994149543 | 2,42348661  |
| <i>Frat1</i>         | 1,83012811  | 1,959292309 | 2,107368961 | 1,987086611 | 2,454167564 |
| <i>Tnk1</i>          | 1,878599311 | 2,100130548 | 2,192643435 | 1,940644461 | 2,37148834  |
| <i>Ptp4a3</i>        | 1,995623412 | 1,988034223 | 2,032620786 | 1,967796126 | 2,410774787 |
| <i>Gm16157</i>       | 2,033681738 | 2,058721353 | 2,114421424 | 1,948871803 | 2,395669481 |
| <i>Jakmip1</i>       | 1,832814649 | 1,978053396 | 2,008974547 | 1,956327507 | 2,288983571 |
| <i>Sp2</i>           | 1,918716703 | 1,899949612 | 2,044646375 | 1,941074324 | 2,299167651 |
| <i>Ppm1h</i>         | 1,982667763 | 1,906393303 | 2,174001456 | 1,916454355 | 2,338167911 |
| <i>Tpcn1</i>         | 1,939465744 | 1,93458672  | 2,205170839 | 1,974910011 | 2,378155792 |
| <i>Chst12</i>        | 1,970742516 | 1,846529756 | 2,236436815 | 1,947061635 | 2,299919032 |
| <i>Sema4b</i>        | 1,782873295 | 1,90131529  | 2,25260692  | 1,879637476 | 2,347279205 |
| <i>Ptov1</i>         | 1,883469754 | 1,936145438 | 2,301586257 | 1,900412646 | 2,301946077 |
| <i>Pitpnm1</i>       | 2,119884103 | 2,109161561 | 2,083675921 | 2,045040184 | 2,365261981 |
| <i>Ctsd</i>          | 2,12554452  | 2,050666251 | 2,210365694 | 1,993265752 | 2,39617349  |
| <i>Irs3</i>          | 2,072695325 | 2,21516481  | 2,194730659 | 2,027558221 | 2,312549877 |
| <i>Tap2</i>          | 2,243464726 | 2,145722177 | 2,120150438 | 2,033149259 | 2,314601479 |
| <i>Rnf157</i>        | 2,267346813 | 2,111983941 | 2,231896656 | 2,086107052 | 2,288413659 |
| <i>Scamp4</i>        | 2,256482903 | 2,073309399 | 2,158518251 | 2,192564281 | 2,358825433 |
| <i>Nck2</i>          | 2,198735292 | 2,174144852 | 2,214439935 | 1,986126235 | 2,139566285 |
| <i>Sidt2</i>         | 2,163979949 | 2,121903136 | 2,177675556 | 2,136986836 | 2,113876702 |
| <i>Amz2</i>          | 2,052924625 | 2,176954473 | 2,157213738 | 2,182183637 | 2,288994439 |
| <i>Commd3</i>        | 2,030781453 | 2,146319919 | 2,207935178 | 2,256364747 | 2,162355141 |
| <i>Pop5</i>          | 2,026067942 | 2,16136793  | 2,372853283 | 2,324605204 | 2,337960713 |

|                      |             |             |             |             |             |
|----------------------|-------------|-------------|-------------|-------------|-------------|
| <i>Park7</i>         | 2,079775787 | 2,180713587 | 2,34578421  | 2,216227873 | 2,350340203 |
| <i>Cd101</i>         | 1,758810156 | 2,079677151 | 2,059191491 | 2,027072612 | 2,052614587 |
| <i>Rpa1</i>          | 1,827886908 | 2,001557149 | 2,022085434 | 1,991814703 | 2,066159446 |
| <i>Tsc22d4</i>       | 1,710471146 | 1,961481584 | 2,079055257 | 1,973224025 | 2,072367726 |
| <i>Ccrn4l</i>        | 1,717865955 | 1,951353936 | 2,131527324 | 1,951436136 | 2,145319685 |
| <i>Lcmt2</i>         | 1,984411433 | 1,893254732 | 2,145618837 | 2,115420628 | 2,138474835 |
| <i>Ubash3a</i>       | 1,885568571 | 2,296239209 | 2,076193548 | 2,042996994 | 2,112398026 |
| <i>Smad3</i>         | 1,888008142 | 2,153072739 | 2,087297784 | 1,999458421 | 2,094278144 |
| <i>Zfp710</i>        | 1,871066457 | 2,18680886  | 2,078500233 | 2,201678167 | 2,14943206  |
| <i>Dctn6</i>         | 1,681229111 | 2,204269023 | 2,031182246 | 2,101262242 | 2,077939853 |
| <i>Mospd3</i>        | 1,736754528 | 2,160954653 | 1,952000061 | 2,172731217 | 2,124728335 |
| <i>Snn</i>           | 1,765117069 | 2,189319303 | 2,192860579 | 2,115499644 | 1,915341592 |
| <i>Sec22c</i>        | 1,880851015 | 2,125215518 | 2,221494249 | 2,131087524 | 1,99084667  |
| <i>Hoxa4</i>         | 1,845169203 | 2,127477785 | 2,430604582 | 2,098235029 | 1,901019416 |
| <i>Abcb9</i>         | 2,088846621 | 2,075974063 | 2,104597131 | 1,975931572 | 2,167260345 |
| <i>Patz1</i>         | 2,164325653 | 2,03211752  | 2,116062065 | 1,96141228  | 2,10711274  |
| <i>Stambpl1</i>      | 2,058147708 | 2,038884138 | 2,077261395 | 1,922563152 | 2,063651059 |
| <i>H2-T10</i>        | 2,005749796 | 2,065778152 | 1,895371095 | 1,94536924  | 2,093798173 |
| <i>Tbc1d2b</i>       | 1,936202871 | 2,11704754  | 2,199350238 | 1,892590942 | 2,185067811 |
| <i>Rgs14</i>         | 1,997410663 | 2,118168969 | 2,215733216 | 1,926209216 | 2,147100155 |
| <i>Cmtm7</i>         | 2,012457743 | 2,039830598 | 2,15926298  | 1,824061237 | 2,228898326 |
| <i>Bloc1s3</i>       | 1,972115232 | 1,94437429  | 2,087717621 | 1,877194543 | 2,150785825 |
| <i>Aff1</i>          | 1,927309622 | 1,972756743 | 2,165627798 | 1,88277228  | 2,099104933 |
| <i>U2af1</i>         | 1,948899648 | 2,142664567 | 2,194518517 | 1,946068022 | 2,024569188 |
| <i>Scarb2</i>        | 1,934822904 | 2,080009022 | 2,159385564 | 1,899735268 | 2,055598198 |
| <i>Mafg</i>          | 1,932739151 | 2,196725433 | 2,087831711 | 1,868544626 | 1,970718949 |
| <i>Gngt2</i>         | 2,009050918 | 2,101261574 | 2,232500855 | 1,817984365 | 1,882765343 |
| <i>Psmc5</i>         | 1,904104124 | 2,043999113 | 2,056769133 | 1,634940435 | 2,072729823 |
| <i>Unc119b</i>       | 2,084945943 | 2,066696141 | 2,118400344 | 1,623093604 | 2,132404851 |
| <i>Tmem221</i>       | 2,117011785 | 2,16159918  | 1,925411797 | 1,625535145 | 2,058635502 |
| <i>Ppp1r3b</i>       | 2,240045208 | 2,411553456 | 2,329450613 | 1,815771882 | 2,028789652 |
| <i>Slamf1</i>        | 2,279633366 | 2,200881912 | 2,330974362 | 1,888603913 | 1,933732966 |
| <i>Trib2</i>         | 2,080797415 | 2,302552901 | 2,312855633 | 2,005276731 | 2,003002748 |
| <i>Gmfg</i>          | 2,203177674 | 2,284729839 | 2,253279716 | 2,012222515 | 2,247628607 |
| <i>Poli</i>          | 2,191223185 | 2,244140182 | 2,323158428 | 2,118214047 | 2,245322237 |
| <i>Csrnp1</i>        | 2,246056441 | 2,322223143 | 2,398397481 | 2,039541504 | 2,217638965 |
| <i>Traf1</i>         | 2,173862074 | 2,167586629 | 2,349657538 | 1,975876755 | 2,264909354 |
| <i>Pitpnm2</i>       | 2,400783432 | 2,190087765 | 2,309288494 | 1,983508907 | 2,214237118 |
| <i>Ramp1</i>         | 2,306690781 | 2,109564    | 2,157910237 | 1,770219965 | 2,056378339 |
| <i>H6pd</i>          | 2,236111107 | 2,043045244 | 2,218796839 | 1,789067136 | 2,289794122 |
| <i>Lrrc1</i>         | 2,05879802  | 2,050228024 | 2,253688079 | 1,956067946 | 2,045060999 |
| <i>2810408A11Rik</i> | 2,114605345 | 2,005970914 | 2,218312881 | 1,978106815 | 2,155545489 |
| <i>Gtf2ird1</i>      | 2,085583626 | 2,00337833  | 2,309134985 | 1,858226475 | 2,176895742 |
| <i>Yipf3</i>         | 2,185690879 | 1,883370185 | 2,272193378 | 2,025497108 | 2,146538121 |
| <i>Pdgb</i>          | 2,108275516 | 1,771886297 | 1,993748864 | 1,700674092 | 2,192669881 |
| <i>Scn2b</i>         | 2,153376444 | 1,690500742 | 2,107321946 | 1,751529416 | 2,203521394 |
| <i>Lrrc50</i>        | 2,291415545 | 1,864178779 | 2,044465725 | 1,793993764 | 2,182676218 |
| <i>Gsk3a</i>         | 2,572835761 | 1,941454485 | 2,115246677 | 1,826055074 | 2,154667638 |
| <i>Hyal2</i>         | 2,471809864 | 1,822740856 | 2,082265364 | 1,829317008 | 2,240316628 |
| <i>Chchd5</i>        | 2,404955282 | 1,797786061 | 2,076779885 | 1,747882299 | 1,971262166 |
| <i>Gpr152</i>        | 2,505623394 | 1,782663007 | 2,117611554 | 1,792377942 | 2,043404253 |



|                      |             |             |             |             |             |
|----------------------|-------------|-------------|-------------|-------------|-------------|
| <i>Phlda1</i>        | 2,411944795 | 1,894794921 | 2,144652531 | 1,841061463 | 2,042032289 |
| <i>Wbscr27</i>       | 2,345464822 | 1,749045021 | 2,104133607 | 2,197093492 | 2,213967358 |
| <i>Trim59</i>        | 2,300983118 | 1,81278297  | 2,141582089 | 2,165196725 | 2,506941959 |
| <i>Nudt16</i>        | 2,299473827 | 1,735549899 | 2,421257881 | 2,138195508 | 2,274803598 |
| <i>Sla2</i>          | 2,453129033 | 2,194746421 | 2,514349939 | 1,932232153 | 2,525234034 |
| <i>Adrb2</i>         | 2,506076438 | 2,226373179 | 2,660510031 | 1,946025505 | 2,502542749 |
| <i>Fam65a</i>        | 2,291403883 | 2,185258031 | 2,590825937 | 1,840067593 | 2,308599052 |
| <i>Psap</i>          | 2,494207036 | 2,147343016 | 2,374817017 | 1,814537551 | 2,432302843 |
| <i>Slc16a5</i>       | 2,605653138 | 2,190810236 | 2,410284606 | 1,937746929 | 2,099685707 |
| <i>Thy1</i>          | 2,531986509 | 2,00834984  | 2,441016488 | 1,892412853 | 2,178785267 |
| <i>Rnf26</i>         | 2,453380508 | 2,181198202 | 2,733180385 | 1,876087812 | 1,905190729 |
| <i>B330016D10Rik</i> | 2,242609648 | 1,944951269 | 2,65779782  | 1,748801551 | 2,086733825 |
| <i>Tob2</i>          | 2,281777889 | 2,24860955  | 2,386655009 | 1,971307185 | 2,56013505  |
| <i>Ppp1r9b</i>       | 2,362125977 | 2,185971072 | 2,322514593 | 2,057192176 | 2,639033323 |
| <i>Arpc3</i>         | 2,37280902  | 2,410782182 | 2,400498416 | 2,018730673 | 2,435420486 |
| <i>Tmem104</i>       | 2,43309116  | 2,308069034 | 2,282240706 | 2,141448609 | 2,238382461 |
| <i>Gm11529</i>       | 2,402412601 | 2,382004722 | 2,360899067 | 2,18569617  | 2,307577673 |
| <i>1500031L02Rik</i> | 2,360017949 | 2,322945666 | 2,208447233 | 2,267349033 | 2,394860874 |
| <i>Chrac1</i>        | 2,181617253 | 2,132373205 | 2,306380569 | 2,177165719 | 2,448301779 |
| <i>Ankrd13a</i>      | 2,172194567 | 2,221309563 | 2,192735176 | 2,130478182 | 2,45893156  |
| <i>Gm7367</i>        | 2,24533006  | 2,228245085 | 2,335624602 | 2,17076159  | 2,553234462 |
| <i>Fam100b</i>       | 2,2494362   | 2,187500511 | 2,299362817 | 2,126626903 | 2,53715632  |
| <i>Pecam1</i>        | 2,261496744 | 2,095981118 | 2,172764956 | 2,344170597 | 2,573959409 |
| <i>D19Wsu162e</i>    | 1,966756384 | 2,406897323 | 2,485459227 | 2,236006957 | 2,345748317 |
| <i>Lcp2</i>          | 1,920882225 | 2,366670176 | 2,512549124 | 2,216148074 | 2,417281524 |
| <i>Abcg1</i>         | 2,014392932 | 2,370198256 | 2,504183096 | 2,186179494 | 2,447263863 |
| <i>Ppp2r5c</i>       | 1,929616748 | 2,290770297 | 2,470228452 | 2,235455956 | 2,476875676 |
| <i>Slc20a1</i>       | 1,955236002 | 2,300505922 | 2,318802283 | 2,154296437 | 2,386127291 |
| <i>Tram1</i>         | 2,121000148 | 2,312360956 | 2,315946652 | 2,163052644 | 2,407171042 |
| <i>B3gnt2</i>        | 2,15650401  | 2,268423253 | 2,394728185 | 2,100558823 | 2,458341738 |
| <i>Art4</i>          | 2,106480198 | 2,394807015 | 2,426715153 | 2,059358017 | 2,365352984 |
| <i>Fam169b</i>       | 2,0845035   | 2,209096909 | 2,45277361  | 2,163198046 | 2,546887363 |
| <i>Ifi47</i>         | 2,027623264 | 2,15329378  | 2,522629906 | 2,27088399  | 2,438326108 |
| <i>Hvcn1</i>         | 2,099252668 | 2,1896862   | 2,425101378 | 2,418135512 | 2,534475236 |
| <i>Klhl9</i>         | 2,016122678 | 2,053110083 | 2,49578458  | 2,20603717  | 2,879546317 |
| <i>Ahdc1</i>         | 1,943619877 | 2,045144557 | 2,502785583 | 2,085912154 | 2,696402308 |
| <i>Prrc2b</i>        | 2,056988663 | 2,305645467 | 2,648857065 | 2,203124391 | 2,697950064 |
| <i>Galnt2</i>        | 2,175668144 | 2,229676413 | 2,612149134 | 2,237912248 | 2,621986949 |
| <i>Tbxa2r</i>        | 2,416195459 | 1,967913394 | 2,765205467 | 2,091984254 | 2,647002356 |
| <i>Smpd2</i>         | 2,443529284 | 1,960226225 | 2,567636863 | 2,190620279 | 2,529771518 |
| <i>Fancf</i>         | 2,254047366 | 1,981276547 | 2,730572763 | 1,947726043 | 2,509205483 |
| <i>Nfkbil1</i>       | 2,591088469 | 2,375211248 | 2,239257963 | 2,097335851 | 2,520797918 |
| <i>Tmem191c</i>      | 2,611012427 | 2,39164718  | 2,159445035 | 2,038184855 | 2,441548434 |
| <i>Ddx54</i>         | 2,592489104 | 2,293148031 | 2,310439859 | 2,192131025 | 2,440714191 |
| <i>Fhl3</i>          | 2,735466925 | 2,246923867 | 2,198147092 | 2,043970824 | 2,371700059 |
| <i>Trpt1</i>         | 2,528949515 | 1,97987797  | 2,046958363 | 2,029224028 | 2,465068801 |
| <i>Cxcr5</i>         | 2,495141086 | 2,055849513 | 2,198434326 | 2,110313841 | 2,506602503 |
| <i>Lym7</i>          | 2,649060104 | 2,171665574 | 2,490494223 | 2,095656043 | 2,446886146 |
| <i>4930465M20Rik</i> | 2,534372357 | 2,217154306 | 2,443437713 | 2,284301464 | 2,586708083 |
| <i>Hes6</i>          | 2,694762884 | 2,000479669 | 2,409365852 | 2,275970157 | 2,608655191 |
| <i>Pelo</i>          | 2,543078342 | 2,385704578 | 2,175140285 | 2,608183768 | 2,327605674 |

|                      |             |             |             |             |             |
|----------------------|-------------|-------------|-------------|-------------|-------------|
| <i>Odf3b</i>         | 2,666714706 | 2,218842238 | 2,008537195 | 2,406174418 | 2,361909679 |
| <i>2410075B13Rik</i> | 2,217658664 | 2,122790725 | 2,119729877 | 2,528785178 | 2,354405354 |
| <i>Pdlim4</i>        | 2,249899423 | 2,114884365 | 2,111318088 | 2,382643859 | 2,24487787  |
| <i>Csf2ra</i>        | 2,318167473 | 2,330226568 | 1,999235545 | 2,507759856 | 2,345841837 |
| <i>Prelid1</i>       | 2,208855351 | 2,062725503 | 2,279430285 | 2,798568568 | 2,346046024 |
| <i>Otud1</i>         | 2,251688339 | 2,125292942 | 2,453548403 | 2,90001515  | 2,302393161 |
| <i>6230427J02Rik</i> | 2,058196908 | 2,145856158 | 2,472907851 | 2,844856034 | 2,451237587 |
| <i>Sephs2</i>        | 2,341876505 | 1,950961841 | 2,331827932 | 2,594040585 | 2,62903752  |
| <i>4930542H20Rik</i> | 1,993145792 | 1,969942872 | 2,547687701 | 2,405185118 | 2,34180805  |
| <i>Eif1b</i>         | 1,903421872 | 2,060953163 | 2,729518783 | 2,507963252 | 2,383249504 |
| <i>Crlf2</i>         | 2,115975453 | 1,753430052 | 1,88627024  | 2,014384234 | 2,457072067 |
| <i>Icam4</i>         | 2,235218724 | 1,740579576 | 1,855078004 | 1,90864149  | 2,467925161 |
| <i>Mesdc1</i>        | 2,016804899 | 1,50845162  | 1,854292289 | 1,947682436 | 2,40113126  |
| <i>2310047M10Rik</i> | 2,42244952  | 1,684623692 | 1,574874127 | 1,943813681 | 2,569195533 |
| <i>Sco2</i>          | 1,748740731 | 1,969202907 | 1,665600776 | 2,189168683 | 2,807653636 |
| <i>Gfer</i>          | 1,838553541 | 1,742993213 | 1,741609682 | 2,281173293 | 2,616635185 |
| <i>Rom1</i>          | 1,975673646 | 1,611838643 | 1,865463243 | 2,383659846 | 3,49081829  |
| <i>Podnl1</i>        | 2,129068446 | 1,687651383 | 2,093808768 | 1,950086021 | 2,609061569 |
| <i>Cd97</i>          | 2,177064061 | 1,690319967 | 2,075346823 | 1,970540824 | 2,543874734 |
| <i>Gramd3</i>        | 2,063217998 | 1,781044096 | 2,095308998 | 2,164668876 | 2,626170688 |
| <i>Lypla2</i>        | 1,921812142 | 1,954799999 | 2,032957962 | 1,948206023 | 2,738971832 |
| <i>Fam167b</i>       | 2,002060414 | 2,278138992 | 2,034727519 | 2,013493025 | 2,683120266 |
| <i>Psemb10</i>       | 2,038943094 | 2,239995396 | 2,016599445 | 2,081311926 | 2,604614606 |
| <i>Gm10190</i>       | 2,150336966 | 2,286515785 | 1,985073007 | 1,872554117 | 2,710166658 |
| <i>Thtpa</i>         | 2,087847219 | 2,242522604 | 1,939675744 | 2,153464148 | 2,452889708 |
| <i>Cxxc5</i>         | 2,477931566 | 2,094534691 | 2,495267731 | 1,788007891 | 2,810432915 |
| <i>Al837181</i>      | 2,568802837 | 1,844644665 | 2,394235082 | 1,813218579 | 3,138533798 |
| <i>Mlf2</i>          | 1,587956691 | 1,67903965  | 1,797103726 | 2,067342138 | 1,59181838  |
| <i>Tmem223</i>       | 1,737530219 | 1,697150678 | 1,970299259 | 1,904336835 | 1,430990988 |
| <i>Fitm1</i>         | 1,442296477 | 1,482201575 | 2,333232834 | 2,109467459 | 1,496820862 |
| <i>Marcksl1</i>      | 1,942835233 | 1,810752233 | 2,377659259 | 1,83708573  | 1,709769719 |
| <i>Gpt</i>           | 1,744207732 | 1,781608801 | 2,247680434 | 1,974504695 | 1,803475425 |
| <i>Gapdh</i>         | 2,071108614 | 1,518198769 | 2,369623043 | 1,826350047 | 1,945750388 |
| <i>Spsb2</i>         | 2,334458354 | 1,202451704 | 1,813864612 | 1,88397813  | 1,33431647  |
| <i>H2-Ke6</i>        | 1,946648916 | 1,387733907 | 1,82579613  | 1,938094155 | 1,51850867  |
| <i>8430419L09Rik</i> | 1,651877572 | 1,973763137 | 1,905066103 | 1,721047248 | 1,653389579 |
| <i>Fbxw8</i>         | 1,677847949 | 1,843598303 | 1,935334541 | 1,714579655 | 1,659663364 |
| <i>Neu1</i>          | 1,686876733 | 1,892194609 | 1,737952121 | 1,772259697 | 1,668195887 |
| <i>4930415F15Rik</i> | 1,731855604 | 1,866723322 | 1,797623161 | 1,746689872 | 1,634911627 |
| <i>A830007P12Rik</i> | 1,752494324 | 1,898032148 | 1,782619538 | 1,857517442 | 1,655566319 |
| <i>Tnfrsf10b</i>     | 1,62837166  | 1,687028178 | 1,859353068 | 1,726388936 | 1,739643447 |
| <i>Cpm</i>           | 1,522070088 | 1,761132448 | 1,89247704  | 1,816686591 | 1,796986999 |
| <i>Dnajc3</i>        | 1,654002068 | 1,677154693 | 1,838999209 | 1,577682142 | 1,798935359 |
| <i>Heatr2</i>        | 1,674275624 | 1,692836218 | 1,835960384 | 1,578007771 | 1,789997353 |
| <i>Tcf25</i>         | 1,664367016 | 1,767134037 | 1,816492276 | 1,660398937 | 1,869861012 |
| <i>Mier1</i>         | 1,724245853 | 1,814168272 | 1,885907241 | 1,529581594 | 1,727003942 |
| <i>Stat3</i>         | 1,830305124 | 1,776954709 | 1,791951493 | 1,744913855 | 1,793300441 |
| <i>Arid1b</i>        | 1,766119081 | 1,807316464 | 1,787977115 | 1,758545559 | 1,762949412 |
| <i>Rcbtb2</i>        | 1,839043563 | 1,861157748 | 1,838617451 | 1,68412737  | 1,828248041 |
| <i>Enthd1</i>        | 1,806742308 | 1,69261389  | 1,844850587 | 1,693058972 | 1,886157021 |
| <i>Soat1</i>         | 1,819867484 | 1,782670342 | 1,819978945 | 1,648375111 | 1,92649131  |

|                      |             |             |             |             |             |
|----------------------|-------------|-------------|-------------|-------------|-------------|
| <i>Atp6v0a2</i>      | 1,810640026 | 1,808138313 | 1,982521647 | 1,557728683 | 1,847508177 |
| <i>Cacnb1</i>        | 1,884956691 | 1,730870159 | 2,065795823 | 1,644290954 | 1,806489088 |
| <i>Pycard</i>        | 1,715714517 | 1,804433343 | 2,096011784 | 1,730374802 | 1,740603961 |
| <i>1700122O11Rik</i> | 1,759051169 | 1,699339674 | 2,066393512 | 1,830557432 | 1,858982127 |
| <i>BC051537</i>      | 1,664877071 | 1,630558913 | 1,999545482 | 1,780775751 | 1,949944341 |
| <i>Tradd</i>         | 1,79984095  | 1,724920515 | 1,894521107 | 1,853861461 | 1,953559525 |
| <i>Rab11fip4</i>     | 1,825064853 | 1,707314851 | 1,981773851 | 1,816671387 | 2,031274799 |
| <i>Abhd2</i>         | 1,423859943 | 1,699380407 | 1,818781552 | 1,733232351 | 1,95142812  |
| <i>Cyfp2</i>         | 1,395119636 | 1,747812354 | 1,858187725 | 1,760983415 | 1,974662306 |
| <i>Rrp1</i>          | 1,394829172 | 1,756673836 | 1,776249322 | 1,705556012 | 2,050358044 |
| <i>Mtmr12</i>        | 1,50591819  | 1,716230795 | 1,763026731 | 1,785710429 | 1,91013314  |
| <i>Tbcel</i>         | 1,526029796 | 1,744682586 | 1,780748888 | 1,815370136 | 2,002268648 |
| <i>Spata2l</i>       | 1,513075535 | 1,767812472 | 1,786043914 | 1,664246316 | 1,943800854 |
| <i>4921511C10Rik</i> | 1,518955141 | 1,745441317 | 1,771395166 | 1,595428167 | 1,875045734 |
| <i>3110082I17Rik</i> | 1,447980569 | 1,756633455 | 1,712049995 | 1,685199056 | 1,896399807 |
| <i>Cisd2</i>         | 1,378757336 | 1,649144646 | 1,746382906 | 1,646946104 | 1,887764407 |
| <i>Churc1</i>        | 1,387176152 | 1,903029818 | 1,818395306 | 1,819185324 | 1,849186307 |
| <i>Mfhas1</i>        | 1,358996514 | 1,862614213 | 1,860958151 | 1,757527256 | 1,83993871  |
| <i>1110014N23Rik</i> | 1,417894747 | 1,871724342 | 1,720262715 | 1,817315969 | 1,906905627 |
| <i>1700003F17Rik</i> | 1,591780984 | 1,922209338 | 1,96362924  | 1,898345707 | 1,860909129 |
| <i>Zbtb38</i>        | 1,531237658 | 1,959520845 | 1,909990143 | 1,812180125 | 1,923971488 |
| <i>Foxn3</i>         | 1,61914993  | 1,938241163 | 1,84822199  | 1,877014374 | 1,787789465 |
| <i>Ppard</i>         | 1,643251079 | 1,880067903 | 1,988527523 | 1,757907483 | 1,952517096 |
| <i>Klf7</i>          | 1,646627433 | 1,907191139 | 1,926151798 | 1,701197551 | 1,887231914 |
| <i>Trak1</i>         | 1,493744375 | 1,841559377 | 1,801984893 | 1,934063635 | 1,857418518 |
| <i>Zmiz1</i>         | 1,602525411 | 1,824385682 | 1,839210529 | 1,916816229 | 1,962185587 |
| <i>Rgmb</i>          | 1,457654095 | 1,844687721 | 1,936364198 | 1,872288566 | 2,003413927 |
| <i>Spata13</i>       | 1,793710591 | 1,905565945 | 1,973313116 | 1,713119403 | 1,902306871 |
| <i>Rest</i>          | 1,829445292 | 1,944367144 | 2,0138698   | 1,631182563 | 1,952936167 |
| <i>Cbr1</i>          | 1,735964087 | 2,020666174 | 2,044753487 | 1,568839379 | 1,79303526  |
| <i>Klhdc7b</i>       | 1,751155439 | 2,03457054  | 2,201423341 | 1,593615926 | 1,964842134 |
| <i>Gm614</i>         | 2,002679814 | 1,947041643 | 1,912794596 | 1,60476124  | 1,827569108 |
| <i>Il12rb1</i>       | 1,991748049 | 1,797201296 | 1,904668076 | 1,486940733 | 1,872332341 |
| <i>E130317F20Rik</i> | 1,911402535 | 1,954666471 | 1,907360374 | 1,380004877 | 1,957649394 |
| <i>Lmnb1</i>         | 1,751041507 | 1,756731361 | 1,971221671 | 1,58492202  | 1,973431972 |
| <i>Rai1</i>          | 1,657569412 | 1,737111269 | 1,934139405 | 1,574588606 | 1,958829921 |
| <i>Ptch1</i>         | 1,723327934 | 1,704530619 | 2,067580001 | 1,459362359 | 2,036214191 |
| <i>Slc11a2</i>       | 1,789815318 | 1,696890434 | 1,948201572 | 1,454067325 | 2,064679391 |
| <i>Rcor2</i>         | 1,769696142 | 1,713484418 | 1,855283434 | 1,477051502 | 2,019491636 |
| <i>Pura</i>          | 1,610329541 | 1,944869421 | 1,861471342 | 1,518578757 | 2,013014997 |
| <i>Unc13d</i>        | 1,642590955 | 1,60090854  | 1,654729956 | 1,615812627 | 2,060292387 |
| <i>Haghl</i>         | 1,697050448 | 1,666122793 | 1,600503881 | 1,55495822  | 2,077655941 |
| <i>Fam109a</i>       | 1,752679867 | 1,693858318 | 1,716596739 | 1,404673877 | 2,114702641 |
| <i>Calm3</i>         | 1,800787431 | 1,589195897 | 1,780559085 | 1,673664359 | 2,102536475 |
| <i>Trim14</i>        | 1,80331144  | 1,696341346 | 1,767291893 | 1,659342941 | 2,12185007  |
| <i>Tom34</i>         | 1,869652374 | 1,668790307 | 1,826973672 | 1,670071519 | 2,038142118 |
| <i>Anp32e</i>        | 1,737216495 | 1,561642092 | 1,892134874 | 1,602866013 | 2,16208155  |
| <i>Mrps12</i>        | 1,831864907 | 1,476009692 | 1,601358105 | 1,674804272 | 2,100254817 |
| <i>1700001G11Rik</i> | 1,895411217 | 1,594038191 | 1,528890041 | 1,494553568 | 2,143298785 |
| <i>Rhbd1l</i>        | 2,072646576 | 1,648250773 | 1,853885702 | 1,544754916 | 2,216180685 |
| <i>Gamt</i>          | 2,075120528 | 1,615723199 | 1,722084978 | 1,514534755 | 2,142474216 |

|                      |             |             |             |             |             |
|----------------------|-------------|-------------|-------------|-------------|-------------|
| <i>Dnajc15</i>       | 2,022404611 | 1,628656976 | 1,831810018 | 1,377735776 | 2,10249067  |
| <i>Padi2</i>         | 1,996440148 | 1,6873642   | 1,808533623 | 1,619047349 | 1,723307747 |
| <i>Agfg2</i>         | 1,957173142 | 1,62504623  | 1,919496691 | 1,675749284 | 1,805278413 |
| <i>Hmbs</i>          | 1,942697971 | 1,460350103 | 1,789489766 | 1,705659239 | 1,778230895 |
| <i>Mcam</i>          | 1,838095501 | 1,593383649 | 1,800794374 | 1,524673662 | 1,887258624 |
| <i>Trpc4ap</i>       | 1,866946892 | 1,603457921 | 1,858791136 | 1,595162475 | 1,848940195 |
| <i>Tmem50b</i>       | 1,942395341 | 1,631748289 | 1,753333088 | 1,67550667  | 1,93039428  |
| <i>Idh2</i>          | 1,9852977   | 1,838259084 | 1,921796705 | 1,889613215 | 1,940227314 |
| <i>Sft2d2</i>        | 1,968973104 | 1,912418938 | 1,919665384 | 1,870540022 | 1,903542428 |
| <i>Crtc3</i>         | 1,839164429 | 1,848984313 | 1,895611745 | 1,81437672  | 1,914582178 |
| <i>Tnf</i>           | 2,003258161 | 1,630456592 | 1,865608599 | 1,965315836 | 1,910757476 |
| <i>Notch1</i>        | 2,090167559 | 1,819017388 | 1,87835783  | 1,812883342 | 2,124692371 |
| <i>Med29</i>         | 2,036887598 | 1,778783283 | 1,889151052 | 1,835334589 | 2,056550932 |
| <i>1190002F15Rik</i> | 2,11655269  | 1,899953602 | 1,888589911 | 1,959042357 | 2,080026787 |
| <i>Srebfb2</i>       | 1,937539423 | 1,779588321 | 1,976096706 | 1,809389166 | 2,100666851 |
| <i>Gm19557</i>       | 1,927610889 | 1,825376656 | 1,860204004 | 1,795724328 | 2,082709032 |
| <i>Fam117a</i>       | 1,925281108 | 1,740532022 | 1,968510174 | 1,683612607 | 2,141433514 |
| <i>6330512M04Rik</i> | 2,046493604 | 1,7166237   | 1,893193525 | 1,694892383 | 1,968590328 |
| <i>Ifngr1</i>        | 2,162621966 | 1,783312395 | 1,822553568 | 1,668169503 | 1,775116003 |
| <i>Gm15408</i>       | 2,134259405 | 1,774069451 | 1,848093102 | 1,612871652 | 1,854165176 |
| <i>Poc1b</i>         | 2,071015809 | 1,827354878 | 1,782141327 | 1,641528441 | 1,81881248  |
| <i>Reep4</i>         | 2,100242247 | 1,798202384 | 1,658123249 | 1,831797425 | 1,929540332 |
| <i>Hmg20b</i>        | 1,685358454 | 1,560560837 | 1,853736547 | 1,573158633 | 1,980903514 |
| <i>Tmem201</i>       | 1,669404152 | 1,617732702 | 1,861780428 | 1,687187269 | 1,960066301 |
| <i>0610011F06Rik</i> | 1,683990038 | 1,381569389 | 1,792007545 | 1,647998991 | 1,912082738 |
| <i>Gm12216</i>       | 1,628603652 | 1,505731288 | 1,717241635 | 1,565873854 | 1,993141214 |
| <i>Wdr24</i>         | 1,552281808 | 1,554882953 | 1,631815945 | 1,49417913  | 1,899260384 |
| <i>Rftn1</i>         | 1,629281943 | 1,591648289 | 1,795576204 | 1,564336793 | 1,854565804 |
| <i>Cdk2ap1</i>       | 1,605668476 | 1,598135795 | 1,788804137 | 1,461448932 | 1,812835234 |
| <i>Etohd2</i>        | 1,653565667 | 1,663321534 | 1,763324207 | 1,550308637 | 1,910737818 |
| <i>F12</i>           | 1,614801852 | 1,648303674 | 1,690946806 | 1,538630839 | 1,86302977  |
| <i>Ankrd39</i>       | 1,641139103 | 1,714527152 | 1,764680134 | 1,631125288 | 2,176351552 |
| <i>Rpl36al</i>       | 1,549566466 | 1,676918929 | 1,67394473  | 1,651721382 | 2,259040938 |
| <i>2900010M23Rik</i> | 1,487884184 | 1,773435563 | 1,763557302 | 1,592962612 | 2,074301821 |
| <i>Fam100a</i>       | 1,72429409  | 1,723201196 | 1,459606426 | 1,844467806 | 1,855541541 |
| <i>Hmga2-ps1</i>     | 1,711252744 | 1,592581739 | 1,449094245 | 1,699048457 | 1,991266004 |
| <i>Rhbdf2</i>        | 1,826881434 | 1,647425605 | 1,611538379 | 1,738493877 | 1,84992387  |
| <i>Tmem42</i>        | 1,836062024 | 1,606393094 | 1,571169781 | 1,710527499 | 1,805570009 |
| <i>1700007I08Rik</i> | 1,882724802 | 1,527526724 | 1,488575477 | 1,682477643 | 1,909307903 |
| <i>Cdc6</i>          | 1,829587806 | 1,759475751 | 1,664594504 | 1,668157618 | 1,852232938 |
| <i>Fam110a</i>       | 1,781793218 | 1,759935776 | 1,66087539  | 1,5686797   | 1,86432566  |
| <i>Adora2a</i>       | 1,73600277  | 1,680125754 | 1,589264785 | 1,641480301 | 1,875599338 |
| <i>Itga6</i>         | 1,524112805 | 1,665921414 | 1,598977413 | 1,881662612 | 1,852922365 |
| <i>Cdkn1b</i>        | 1,721698592 | 1,612832976 | 1,722967674 | 1,796046085 | 1,841607798 |
| <i>Abca7</i>         | 1,499333519 | 1,530629014 | 1,562459944 | 1,686932973 | 1,96955731  |
| <i>Setd4</i>         | 1,506199385 | 1,568414416 | 1,604386339 | 1,700243037 | 1,849952709 |
| <i>Gm19705</i>       | 1,460498496 | 1,544409262 | 1,695293266 | 1,757952947 | 2,025390497 |
| <i>Tmem179b</i>      | 1,518886709 | 1,401991531 | 1,65646856  | 1,981137678 | 1,800688627 |
| <i>Cilp2</i>         | 1,604818933 | 1,53758912  | 1,73488563  | 2,052678122 | 1,940888633 |
| <i>Crip1</i>         | 1,423834365 | 1,471835069 | 1,587450944 | 1,961760319 | 1,997788527 |
| <i>Ttc13</i>         | 1,486408909 | 1,539037817 | 1,673730904 | 1,919417363 | 2,016673359 |

|                      |             |             |             |             |             |
|----------------------|-------------|-------------|-------------|-------------|-------------|
| <i>Rasal1</i>        | 1,560935013 | 1,477419349 | 1,616534257 | 1,945783158 | 2,091613767 |
| <i>Dusp28</i>        | 1,717403297 | 1,298152611 | 1,693753338 | 2,089275232 | 2,018560912 |
| <i>Gstt2</i>         | 1,683800558 | 1,370531964 | 1,7723294   | 2,038803264 | 1,91714566  |
| <i>Insl3</i>         | 1,756360187 | 1,121067191 | 1,894574055 | 1,953336513 | 1,956166142 |
| <i>Cbl</i>           | 1,608316853 | 2,134685705 | 2,230206044 | 2,093692934 | 2,23508985  |
| <i>Dusp4</i>         | 1,708547679 | 2,191511095 | 2,138185333 | 1,985663823 | 2,189183764 |
| <i>Fam160b1</i>      | 1,720932063 | 2,153782634 | 2,169613981 | 2,251078641 | 2,30537924  |
| <i>LOC100859962</i>  | 1,671801902 | 2,182096179 | 2,040731747 | 2,264632014 | 2,213178267 |
| <i>Cflar</i>         | 1,638649513 | 2,313309876 | 2,276370872 | 2,176890437 | 2,324174862 |
| <i>Pip4k2a</i>       | 1,582572084 | 2,361594839 | 2,315473551 | 2,191968638 | 2,201689341 |
| <i>Grb2</i>          | 1,700798912 | 2,230214743 | 2,296010402 | 2,211780657 | 2,452061245 |
| <i>Orai1</i>         | 1,781910344 | 2,222422507 | 2,311864517 | 2,299000819 | 2,377743129 |
| <i>2810432D09Rik</i> | 1,844849294 | 2,24639941  | 2,198524693 | 2,341840807 | 2,416981639 |
| <i>Gm11541</i>       | 1,879923929 | 2,509896839 | 2,333306212 | 2,260092727 | 2,253446231 |
| <i>Extl3</i>         | 1,92598088  | 2,526935918 | 2,235609089 | 2,297808944 | 2,095663317 |
| <i>2310033P09Rik</i> | 1,897405087 | 2,525374665 | 2,19109929  | 2,495718642 | 2,250656589 |
| <i>Mtss1</i>         | 1,975938358 | 2,315588092 | 2,135846179 | 2,31347744  | 2,033944256 |
| <i>Lymr2</i>         | 1,578439232 | 2,393426359 | 2,478216432 | 2,011714469 | 1,905165578 |
| <i>B230217C12Rik</i> | 1,633512626 | 2,633388061 | 2,267427017 | 1,839311845 | 2,17170983  |
| <i>Nr4a1</i>         | 1,365355909 | 2,731912748 | 2,512943153 | 2,224577487 | 1,96576933  |
| <i>Zbtb7b</i>        | 1,586110668 | 3,391044633 | 1,950460272 | 2,620702305 | 1,772729675 |
| <i>Gm15708</i>       | 1,791020458 | 2,506353895 | 1,750574803 | 2,534586157 | 1,936547822 |
| <i>6430562O15Rik</i> | 2,171532224 | 2,765715053 | 2,27770107  | 2,363642946 | 1,685392334 |
| <i>Dusp6</i>         | 1,955915534 | 2,762664992 | 2,374217317 | 2,261858197 | 2,035421225 |
| <i>Ppp1r35</i>       | 1,964712552 | 2,191881688 | 1,735078265 | 2,022600341 | 1,886600821 |
| <i>Arhgef10</i>      | 1,852296977 | 2,043006735 | 1,792189529 | 1,979027734 | 1,683421059 |
| <i>4931406H21Rik</i> | 1,705638342 | 2,244291831 | 1,634866826 | 1,819857699 | 1,894227643 |
| <i>Ptpn7</i>         | 1,557008666 | 2,138313151 | 1,627411756 | 1,918047145 | 1,79928199  |
| <i>Gimap6</i>        | 1,679096657 | 2,265517947 | 2,033482769 | 1,906355582 | 2,078683684 |
| <i>Nsg2</i>          | 1,746241892 | 2,12952579  | 1,869072785 | 1,931864628 | 1,965965431 |
| <i>Tspan31</i>       | 1,911796335 | 2,308564886 | 1,962525465 | 1,91015037  | 1,908036576 |
| <i>Med13l</i>        | 1,869698632 | 2,116221016 | 1,999834757 | 2,011941495 | 1,915640608 |
| <i>Jund</i>          | 1,811248944 | 2,064724428 | 2,090319844 | 1,858489045 | 1,866446296 |
| <i>Irf4</i>          | 1,812355383 | 2,266555767 | 1,845977923 | 1,821462446 | 1,680094741 |
| <i>Chdh</i>          | 1,721484616 | 2,301444433 | 2,001239801 | 1,817767827 | 1,488621206 |
| <i>Asb2</i>          | 1,696152582 | 2,480843444 | 1,899605024 | 2,026713358 | 1,490148474 |
| <i>Il17rb</i>        | 1,540485524 | 2,443092051 | 1,997449469 | 2,244390329 | 1,57928896  |
| <i>Gadd45a</i>       | 1,32129518  | 2,585010265 | 1,777549431 | 2,280364515 | 1,615783828 |
| <i>4933427E11Rik</i> | 1,319196642 | 2,080561669 | 2,40081713  | 2,720587181 | 1,431154013 |
| <i>B4galnt1</i>      | 1,617504161 | 2,433623105 | 2,882933985 | 2,511359511 | 1,207820627 |
| <i>2010016I18Rik</i> | 1,735672183 | 3,078394915 | 2,656402316 | 1,315884215 | 1,401801073 |
| <i>Limd2</i>         | 1,955228853 | 3,41325255  | 2,795574382 | 1,281069262 | 1,990316732 |
| <i>Psenen</i>        | 1,62761086  | 2,643462888 | 2,646292616 | 0,870415915 | 1,992339032 |
| <i>4930453N24Rik</i> | 0,983619947 | 2,23115536  | 2,268927583 | 2,358055391 | 2,440426279 |
| <i>Usp12</i>         | 0,830595752 | 2,286559873 | 2,392217807 | 2,301829892 | 2,501783147 |
| <i>Apol9b</i>        | 0,618015113 | 2,359433438 | 2,190264544 | 2,500288213 | 2,286532043 |
| <i>Ccnl1</i>         | 0,663624381 | 2,100970607 | 2,473607208 | 2,279288606 | 2,449612523 |
| <i>Ppm1b</i>         | 0,619979754 | 2,200729387 | 2,315719292 | 2,244735139 | 2,382468868 |
| <i>Elk4</i>          | 0,805254892 | 2,08246745  | 2,355101941 | 2,118595971 | 2,476897667 |
| <i>Rpl34-ps1</i>     | 0,730352944 | 1,857332486 | 2,41073044  | 2,255058338 | 2,435964372 |
| <i>Rpl34</i>         | 0,729143775 | 1,860090546 | 2,416705262 | 2,242389633 | 2,447110692 |

|                      |             |             |             |             |             |
|----------------------|-------------|-------------|-------------|-------------|-------------|
| <i>Peli1</i>         | 0,720739603 | 1,886088679 | 2,457890374 | 2,275288935 | 2,36139382  |
| <i>Hspa8</i>         | 0,786415561 | 1,880816231 | 2,286014284 | 2,253295733 | 2,228761371 |
| <i>Vim</i>           | 0,411484779 | 2,161636972 | 2,085158115 | 2,389592944 | 2,597801792 |
| <i>Rgs3</i>          | 0,668949546 | 2,244247276 | 2,335255764 | 2,376882014 | 2,723275434 |
| <i>Hspa5</i>         | 0,392800634 | 1,977927811 | 2,406847795 | 2,342994503 | 2,457474594 |
| <i>Egr2</i>          | 0,46644389  | 2,57732462  | 2,533227936 | 2,153941628 | 2,305315562 |
| <i>Bcl2</i>          | 0,517468563 | 2,024966522 | 2,152563302 | 2,079690137 | 2,184272544 |
| <i>Gpr65</i>         | 0,37015133  | 2,208993269 | 2,214691479 | 2,111274521 | 2,192007773 |
| <i>Samhd1</i>        | 0,442259952 | 2,125150022 | 1,950971641 | 2,191159196 | 2,149378026 |
| <i>Bach2</i>         | 0,256310906 | 2,17643525  | 1,966720325 | 2,224318063 | 2,086030069 |
| <i>4932438H23Rik</i> | 0,603463255 | 2,437631918 | 2,001265615 | 2,054679988 | 1,826977916 |
| <i>Id2</i>           | 0,650512557 | 2,316483368 | 2,152438989 | 2,059020549 | 1,645207201 |
| <i>1700064M15Rik</i> | 0,614089311 | 2,130124771 | 2,427966566 | 2,435826953 | 1,66613442  |
| <i>Yy1</i>           | 1,08628414  | 2,160514681 | 2,420294572 | 2,301233826 | 2,333989324 |
| <i>Rhog</i>          | 1,029527828 | 2,189907277 | 2,411369078 | 2,162236619 | 2,340902288 |
| <i>Fam168b</i>       | 1,049054281 | 2,242009203 | 2,274103821 | 2,217002632 | 2,320255696 |
| <i>Pigx</i>          | 1,209126247 | 2,137195057 | 2,295212566 | 2,216044632 | 2,443138981 |
| <i>Pgam2</i>         | 1,127092991 | 2,158346621 | 2,303350114 | 2,219736857 | 2,483734138 |
| <i>Mgea5</i>         | 1,150599305 | 2,021544475 | 2,258905006 | 2,292033361 | 2,432292509 |
| <i>B230319C09Rik</i> | 1,232165219 | 2,139524502 | 2,4010075   | 2,481587208 | 2,290624328 |
| <i>Zfp740</i>        | 1,138948968 | 2,03803081  | 2,455699359 | 2,513521307 | 2,456502571 |
| <i>Rbm4</i>          | 1,181827353 | 2,442583864 | 2,24511779  | 2,199919144 | 2,23866618  |
| <i>4732490B19Rik</i> | 1,179248799 | 2,36410423  | 2,147730968 | 2,239337047 | 2,462228454 |
| <i>Itgb3</i>         | 1,179142205 | 2,45146928  | 2,196690576 | 2,462588935 | 2,128181904 |
| <i>Wibg</i>          | 1,142628806 | 1,880392018 | 2,126995588 | 2,37546852  | 2,446173155 |
| <i>Dgka</i>          | 1,103419766 | 1,937322837 | 2,222835879 | 2,426740596 | 2,558596523 |
| <i>Srpk1</i>         | 1,055676827 | 1,956012276 | 2,059570079 | 2,31667131  | 2,552293337 |
| <i>Tecpr1</i>        | 1,137635454 | 1,983575012 | 1,917966573 | 2,40541039  | 2,340650576 |
| <i>Herpud1</i>       | 1,205574342 | 1,859696887 | 2,010152905 | 2,397306172 | 2,338220904 |
| <i>Tnfrsf4</i>       | 0,945070015 | 2,7124157   | 1,949876233 | 2,522649789 | 2,45423396  |
| <i>B3galt6</i>       | 0,833865395 | 2,219965312 | 1,897033692 | 2,670990495 | 2,51469671  |
| <i>1700030A11Rik</i> | 0,729490293 | 2,095340666 | 2,299176614 | 2,103993208 | 2,056374721 |
| <i>Sfpq</i>          | 0,937659213 | 2,060517384 | 2,213950652 | 2,09532316  | 1,981821601 |
| <i>Gm11648</i>       | 0,905969274 | 2,097009062 | 2,209743868 | 2,361179534 | 2,229903731 |
| <i>Tbrg3</i>         | 1,001716103 | 2,151860759 | 2,298396868 | 1,960044675 | 2,302028849 |
| <i>Msl2</i>          | 1,056194186 | 2,091702541 | 2,281666535 | 2,082823938 | 2,283658848 |
| <i>Arpc2</i>         | 1,085104032 | 2,161503471 | 2,289296952 | 2,059443931 | 2,101991503 |
| <i>Ecm1</i>          | 1,104951079 | 2,242848506 | 2,380138499 | 2,068267913 | 2,12238249  |
| <i>Hnrnph1</i>       | 0,841055259 | 2,136255114 | 2,154785332 | 2,03060197  | 2,19487211  |
| <i>Cd69</i>          | 0,824415406 | 2,257170754 | 2,212196745 | 2,026632079 | 2,210600898 |
| <i>Cytip</i>         | 0,935952419 | 2,216441477 | 2,112170048 | 2,081129793 | 2,253569906 |
| <i>Mpdu1</i>         | 0,870643246 | 2,218096713 | 1,925885891 | 2,037468552 | 2,278724648 |
| <i>Mapk11</i>        | 0,929031734 | 2,45973153  | 2,086675331 | 1,89959309  | 2,147675945 |
| <i>Parp3</i>         | 0,890734305 | 1,912686901 | 1,959015704 | 2,327165987 | 1,930017482 |
| <i>Tgfbr3</i>        | 0,920203791 | 2,197619029 | 1,954262888 | 2,334157304 | 1,982715377 |
| <i>St6gal1</i>       | 1,222236233 | 2,145242221 | 1,89944056  | 2,082917242 | 2,000501427 |
| <i>Chrm4</i>         | 1,188404046 | 2,158542911 | 1,821764802 | 2,337949299 | 1,909486416 |
| <i>2700046G09Rik</i> | 1,001626171 | 2,533244925 | 1,861099392 | 3,062008344 | 2,228550613 |
| <i>Ptgir</i>         | 0,995464585 | 3,198637126 | 1,723099072 | 2,941584283 | 2,012165194 |

|               | Intragenic 5hmC (log2 CMS-IP/Input) |              |        |           |             |             |
|---------------|-------------------------------------|--------------|--------|-----------|-------------|-------------|
| Gene symbol   | DP                                  | CD4 SP       | CD8 SP | naïve CD4 | naïve CD8   |             |
| <i>Gm2933</i> | 3,448326137                         | -3,724399252 |        | 0         | 1,976219967 | 4,325400807 |
| <i>Gm3706</i> | 3,267143236                         | -2,65882614  |        | 0         | 0           | 3,215164477 |
| <i>Gm2913</i> | 3,263841188                         | 0            |        | 0         | 1,558883275 | 0           |

| Cluster 4            | Intragenic 5hmC (log2 CMS-IP/Input) |              |              |              |              |
|----------------------|-------------------------------------|--------------|--------------|--------------|--------------|
| Gene symbol          | DP                                  | CD4 SP       | CD8 SP       | naïve CD4    | naïve CD8    |
| <i>Olfr1392</i>      | -0,223912088                        | 0,858279175  | 0,90091131   | 0,464962906  | 1,271816676  |
| <i>Cycs</i>          | 0,086803616                         | 0,741634511  | 0,739809028  | 0,312252723  | 1,306362714  |
| <i>Bcl2a1b</i>       | 0,021365981                         | 0,745216589  | 0,697392728  | 0,463155105  | 1,020354199  |
| <i>Acbd6</i>         | 0,074096635                         | 0,654258587  | 0,691568729  | 0,474578972  | 1,051701791  |
| <i>Mia1</i>          | -0,036477438                        | 0,765707337  | 0,545577577  | 0,536359831  | 1,199572622  |
| <i>Tnfrsf12a</i>     | 0,021776509                         | 1,33028447   | 0,767723423  | 0,077422136  | 1,152475264  |
| <i>Cd63</i>          | 0,275049936                         | 0,786134242  | 0,195991309  | 0,228111586  | 1,491290613  |
| <i>Chchd1</i>        | 0,015717148                         | 0,882763862  | 0,163340878  | 0,110860275  | 1,534338849  |
| <i>Sra1</i>          | 0,086979919                         | 0,823561072  | 0,283296107  | 0,324888332  | 1,155619142  |
| <i>Spata25</i>       | -0,107954733                        | 0,654039232  | 0,230514875  | 0,637133023  | 1,569455003  |
| <i>Ppcs</i>          | 0,400566022                         | 0,679960269  | 0,642866745  | 0,398608075  | 1,638389472  |
| <i>Cox7a1</i>        | 0,696612182                         | 0,972026816  | 0,588722272  | 0,13548295   | 1,114641665  |
| <i>Tacstd2</i>       | 0,927274844                         | 1,268582923  | 0,683628594  | 0,151350949  | 1,184105432  |
| <i>Hddc3</i>         | 0,542850533                         | 1,226608063  | 0,421519301  | -0,016835312 | 0,72263004   |
| <i>Klrc3</i>         | -0,367834538                        | 0,074658987  | 0,118949908  | -0,228592136 | 1,415945929  |
| <i>Tmem181c-ps</i>   | 0                                   | 0            | 0            | -1,921116374 | 1,320114931  |
| <i>3000002C10Rik</i> | -0,121057007                        | -0,277806392 | -0,22186403  | 0,217646651  | 1,318515862  |
| <i>Dmrtc1c1</i>      | 0                                   | -1,315398128 | 0            | -1,660312573 | 1,731613379  |
| <i>Dmrtc1c2</i>      | 0                                   | -1,315398128 | 0            | -1,660312573 | 1,731613379  |
| <i>Adam1b</i>        | 0,364431904                         | 0,033187154  | 0,383537947  | -0,02423943  | 1,658781714  |
| <i>Lrrc4</i>         | 0,252999287                         | -0,143501781 | 0,284109694  | 0,099913286  | 1,361929214  |
| <i>Olfr30</i>        | 0,707859839                         | 0,60229071   | -0,641315138 | -0,525571647 | 1,256223923  |
| <i>Gm7092</i>        | 0,95647743                          | -0,3277396   | -0,165361016 | -0,118449599 | 1,169189414  |
| <i>Vmn2r36</i>       | -1,006477564                        | 1,196298582  | -1,128656339 | 0,050718971  | -0,662300309 |
| <i>Cngb1</i>         | 0                                   | 1,030124161  | -0,712234786 | 0            | -0,956267092 |
| <i>2310081J21Rik</i> | -2,485566724                        | 1,503465724  | -0,899189035 | -4,488302908 | 1,009098009  |
| <i>A430092G05Rik</i> | -0,074909497                        | 0,686086317  | 0,577925564  | 1,437498696  | 0,735113707  |
| <i>Gdap10</i>        | 0,15677194                          | 0,811763154  | 0,89034618   | 1,353672091  | 0,734256977  |
| <i>Nkapl</i>         | 0,372475177                         | 0,391447054  | 0,717900077  | 1,373849567  | 0,951530091  |
| <i>Gm2518</i>        | 0,423645368                         | 0,597718081  | 0,795575077  | 1,325888964  | 0,77622772   |
| <i>Pja1</i>          | 0,099322464                         | 0,575479744  | 0,825298272  | 1,132363301  | 0,55333631   |
| <i>B130034C11Rik</i> | 0,171286257                         | 0,517437239  | 0,685399236  | 1,067538984  | 0,510706117  |
| <i>9230116N13Rik</i> | -0,039070606                        | 0,608324272  | 0,961536979  | 1,071941275  | 0,508987339  |
| <i>BC003965</i>      | 0,606026845                         | 0,576052225  | 0,698341598  | 1,003760918  | 0,823675509  |
| <i>D930048N14Rik</i> | 0,699196268                         | 0,529757918  | 0,779968088  | 1,011541833  | 0,680203399  |
| <i>Rgs9bp</i>        | 0,809013353                         | 0,469831758  | 0,62640252   | 1,084259847  | 0,497820136  |
| <i>Grhpr</i>         | 0,742829433                         | 0,631444487  | 0,668694346  | 1,130116626  | 0,810859879  |
| <i>Rpa3</i>          | 0,843187394                         | 0,593747943  | 0,566113952  | 1,248718076  | 0,768972424  |
| <i>Nle1</i>          | 0,783006393                         | 0,645921227  | 0,540549675  | 1,099172386  | 1,009097514  |
| <i>6530401N04Rik</i> | 0,355420915                         | 0,668776972  | 0,506185558  | 1,160082009  | 0,613120586  |
| <i>Pacsin2</i>       | 0,313037713                         | 0,73860902   | 0,435655279  | 1,022000311  | 0,720899637  |
| <i>Pttg1</i>         | 0,558315283                         | 0,727002886  | 0,351267662  | 1,077123914  | 0,758962675  |

|                      |              |              |              |             |              |
|----------------------|--------------|--------------|--------------|-------------|--------------|
| <i>Prph</i>          | 0,586152257  | 0,602569691  | 0,242743023  | 1,143700329 | 0,403947415  |
| <i>Ifnk</i>          | -0,023066545 | 0,374692265  | 0,132681434  | 1,147889287 | 0,703333077  |
| <i>Vpreb3</i>        | -0,03648486  | 0,198404043  | 0,165193099  | 1,282315828 | 0,432256444  |
| <i>B3gnt4</i>        | 0,279505912  | 0,409890914  | 0,149901917  | 1,465198406 | 0,588867076  |
| <i>Rnase10</i>       | -0,240935862 | 0,695578997  | 0,295041161  | 1,230841822 | 0,439992214  |
| <i>St8sia6</i>       | -0,056791956 | 0,726172834  | 0,348775609  | 1,019239635 | 0,353037078  |
| <i>Arl4d</i>         | 0,07565439   | 0,738012813  | 0,180552235  | 1,006463931 | 0,634648046  |
| <i>lbtk</i>          | 0,106502226  | 0,435735303  | 0,442072844  | 1,105120044 | 0,586569589  |
| <i>Gpihbp1</i>       | -0,511830038 | 0,679404188  | -0,116793221 | 1,268423599 | 0,945428064  |
| <i>Tmem120a</i>      | 0,513083195  | 0,907920931  | 0,595817012  | 1,059766787 | 0,612070722  |
| <i>F730043M19Rik</i> | 0,526958991  | 0,841169918  | 0,77950886   | 1,072093696 | 0,638356052  |
| <i>Bcl9</i>          | 0,293372312  | 0,848078593  | 0,785594387  | 1,089609945 | 0,598629175  |
| <i>Lgmn</i>          | 0,53538996   | 1,04700221   | 0,684076352  | 1,131790782 | 0,454695211  |
| <i>Al317395</i>      | 0,434237591  | 0,940290894  | 0,583859205  | 1,180861703 | 0,398059559  |
| <i>Atp1a2</i>        | 0,356364382  | 0,991914734  | 0,663529012  | 1,082481888 | 0,783791348  |
| <i>Znrd1as</i>       | 0,381632519  | 1,023983231  | 0,557607312  | 0,900074363 | 0,713263529  |
| <i>Cyp27b1</i>       | 0,566728144  | 1,038916878  | 0,548049653  | 1,073252718 | 0,851322617  |
| <i>1700034O15Rik</i> | 0,270875409  | 1,01253039   | 0,379218983  | 0,882944265 | 0,499784502  |
| <i>Fcrl1</i>         | 0,289727509  | 1,042812746  | 0,424542944  | 0,959927334 | 0,624302628  |
| <i>Cd200r1</i>       | 0,09773461   | 1,116162391  | 0,456813488  | 1,054230276 | 0,466018978  |
| <i>Siah3</i>         | 0,262742723  | 0,809749031  | 0,432926117  | 1,016496785 | 0,415429752  |
| <i>Stk39</i>         | 0,336468522  | 1,039975074  | 0,690479014  | 0,937612355 | 0,53143318   |
| <i>Atp6v1e2</i>      | 0,312698947  | 1,110518153  | 0,620167682  | 0,868732714 | 0,619273249  |
| <i>Spef1</i>         | 0,646046306  | 0,849950866  | 0,567416053  | 1,090507279 | 0,215132759  |
| <i>Dbil5</i>         | 0,669056048  | 0,890269078  | 0,663585099  | 1,066733967 | 0,047723596  |
| <i>Uox</i>           | 0,453468312  | 1,423270985  | 0,504453864  | 1,15000018  | 0,156623088  |
| <i>4933406C10Rik</i> | 0,237075031  | 1,026213123  | 0,427283422  | 0,857865944 | 0,29097803   |
| <i>BC048562</i>      | 0,352034324  | 1,110541887  | 0,475127859  | 0,927459669 | 0,245490983  |
| <i>Gm14718</i>       | 0,360937962  | 1,176321196  | 0,23263508   | 0,882999412 | 0,253768845  |
| <i>Csf2</i>          | -0,015693868 | 1,008831213  | 0,308351521  | 0,86962989  | 0,347825446  |
| <i>Gm9958</i>        | 0,137607007  | 1,371628285  | 0,348337627  | 0,713782522 | 0,270529046  |
| <i>Dcst1</i>         | 0,16867966   | 1,154822911  | 0,006305079  | 0,929858688 | 0,159574849  |
| <i>Gm4971</i>        | -0,294614927 | -0,006421195 | 0,437954171  | 1,088718765 | 0,548367632  |
| <i>Rpl22l1</i>       | -0,391117434 | 0,091377457  | 0,399655221  | 1,042682534 | 0,531498309  |
| <i>Hspe1</i>         | -0,061858694 | 0,038452565  | 0,417213957  | 1,239010223 | 0,837849044  |
| <i>Mrpl36</i>        | 0,535738093  | 0,211646329  | 0,534444634  | 1,233747344 | 0,299500071  |
| <i>Gm2825</i>        | -1,12409425  | -4,788899698 | 0            | 1,431573527 | -3,122884718 |
| <i>Olfir697</i>      | -0,08879425  | -2,233755269 | -1,290249076 | 1,08919416  | -0,281289849 |
| <i>Alpk2</i>         | 0,07667923   | 0,732118395  | 0,709998037  | 1,050901671 | 1,071609781  |
| <i>Gm14446</i>       | -0,224792961 | 0,740846257  | 0,646119965  | 1,033109662 | 1,089453503  |
| <i>Thyn1</i>         | -0,092031484 | 0,687555021  | 0,616688544  | 1,082257808 | 1,215048834  |
| <i>Aqr</i>           | 0,109720376  | 0,678163113  | 0,738978298  | 1,254110263 | 1,247204233  |
| <i>Malt1</i>         | -0,0565527   | 0,653475012  | 0,782434824  | 1,151766577 | 1,25502622   |
| <i>Mrps30</i>        | 0,107431231  | 0,566520026  | 0,874774138  | 0,948418271 | 1,120681538  |
| <i>Serinc1</i>       | 0,076547739  | 0,638255776  | 0,929975575  | 1,039415999 | 1,076087401  |
| <i>Snrpf</i>         | -0,211114695 | 0,596610496  | 0,811889205  | 1,001115662 | 1,016586599  |
| <i>Pydc3</i>         | -0,205374486 | 0,515640554  | 0,798136419  | 1,031098872 | 1,114269375  |
| <i>AU019990</i>      | 0,09574132   | 0,470087854  | 0,800276939  | 1,058366691 | 1,155438099  |
| <i>Rnf138</i>        | 0,060971922  | 0,570334629  | 0,787318287  | 1,118655752 | 1,124804124  |
| <i>Gatad2b</i>       | 0,095137612  | 0,644138896  | 0,625338746  | 0,731144032 | 1,314840013  |
| <i>Rps5</i>          | 0,15629377   | 0,803154411  | 0,693132259  | 0,784877376 | 1,309160191  |



|                      |              |             |             |             |             |
|----------------------|--------------|-------------|-------------|-------------|-------------|
| <i>Ctrl</i>          | 0,17362167   | 0,794067942 | 0,503127346 | 0,788630423 | 1,226590416 |
| <i>Z410004N09Rik</i> | 0,122292164  | 0,696430567 | 0,519329506 | 1,013362424 | 1,408520081 |
| <i>PsmA2</i>         | -0,042979423 | 0,709567742 | 0,88932185  | 0,850812775 | 1,294875887 |
| <i>Xrn2</i>          | 0,050744235  | 0,616497942 | 0,859037922 | 0,815291059 | 1,359896447 |
| <i>Pdcd10</i>        | 0,005492318  | 0,685409074 | 0,960309821 | 0,917407331 | 1,380662545 |
| <i>Ctsc</i>          | -0,094755762 | 0,716244489 | 0,977843488 | 0,91384961  | 1,373116174 |
| <i>Ptp4a1</i>        | 0,122163228  | 0,811613907 | 0,874972421 | 1,031036455 | 1,454422411 |
| <i>Psmc4</i>         | 0,164818399  | 0,978352653 | 0,737796935 | 0,620470331 | 1,36018622  |
| <i>Hist2h3c2</i>     | 0,256890167  | 0,94013852  | 0,718276262 | 0,768124384 | 1,525305474 |
| <i>Unc50</i>         | 0,454930061  | 0,655641745 | 0,742919486 | 0,921084079 | 1,384008378 |
| <i>9430023L20Rik</i> | 0,419088169  | 0,782730739 | 0,694906173 | 0,939461034 | 1,454022044 |
| <i>Tfjp11</i>        | 0,35951895   | 0,709822159 | 0,693962105 | 0,758250722 | 1,426487286 |
| <i>Slc25a2</i>       | 0,321999233  | 0,624888653 | 0,809640586 | 0,853590842 | 1,33410427  |
| <i>Eef1d</i>         | 0,324831528  | 0,76268503  | 0,836727003 | 0,934062051 | 1,360113136 |
| <i>Plac8</i>         | 0,472081961  | 0,675801015 | 0,830306584 | 0,780259474 | 1,267277967 |
| <i>Spryd3</i>        | 0,441241564  | 0,58146777  | 0,852965041 | 0,821290027 | 1,277796675 |
| <i>Fxyd4</i>         | 0,39594606   | 0,617852453 | 0,829740284 | 0,691240689 | 1,261228298 |
| <i>Zfp259</i>        | 0,340493778  | 0,489598933 | 0,760250154 | 0,759934569 | 1,32837636  |
| <i>Polr2g</i>        | 0,249191448  | 0,7268294   | 0,836478046 | 0,933529724 | 1,035796686 |
| <i>Sf3b3</i>         | 0,225552915  | 0,676806177 | 0,905627308 | 0,9262934   | 1,042113278 |
| <i>Zfc3h1</i>        | 0,188449046  | 0,751349379 | 0,889152422 | 0,873878815 | 1,000858926 |
| <i>Bmi1</i>          | 0,214624124  | 0,741724281 | 0,932343965 | 1,013589431 | 1,000766848 |
| <i>Cdc27</i>         | 0,229056525  | 0,786455453 | 0,925316957 | 1,015320196 | 0,954403232 |
| <i>Nktr</i>          | 0,25497714   | 0,783292922 | 0,939781094 | 1,00345917  | 1,034512405 |
| <i>Ubap2</i>         | 0,334052008  | 0,811408288 | 0,889501677 | 0,908237202 | 1,031785799 |
| <i>Pcmt1</i>         | 0,323673568  | 0,758642173 | 0,849041073 | 0,914869568 | 1,041534018 |
| <i>Appbp2</i>        | 0,317863339  | 0,724737491 | 0,909447703 | 0,969802226 | 1,005981039 |
| <i>Cse1l</i>         | 0,359928814  | 0,817615494 | 0,896403333 | 0,973193221 | 1,11775303  |
| <i>Eef1g</i>         | 0,32024867   | 0,764786454 | 0,933776302 | 0,980058809 | 1,151165762 |
| <i>Phf3</i>          | 0,359092531  | 0,78747139  | 1,02356415  | 0,872104248 | 1,059476797 |
| <i>Cdc26</i>         | 0,347807471  | 0,743828652 | 1,053006497 | 0,858248651 | 1,087507363 |
| <i>4933425H06Rik</i> | 0,298911157  | 0,725132485 | 1,035141401 | 0,823481785 | 1,002346307 |
| <i>Acsl4</i>         | 0,250154731  | 0,821858266 | 1,077076456 | 0,856866111 | 0,995823944 |
| <i>Dcp1b</i>         | 0,257919776  | 0,678354114 | 1,004127651 | 0,920173642 | 0,996326922 |
| <i>Aftph</i>         | 0,412079214  | 0,817099429 | 1,017605749 | 0,913763136 | 0,958937561 |
| <i>Galnt1</i>        | 0,406429808  | 0,802728538 | 1,002447332 | 0,89813111  | 1,017797458 |
| <i>Samd8</i>         | 0,27284456   | 0,835370325 | 0,965988917 | 0,830248726 | 1,072190407 |
| <i>Mllt10</i>        | 0,269470919  | 0,801914224 | 0,925644581 | 0,843478901 | 1,009723509 |
| <i>Gspt1</i>         | 0,307585193  | 0,805234644 | 0,896215372 | 0,859528673 | 1,067718251 |
| <i>8030462N17Rik</i> | 0,249447068  | 0,809847083 | 0,899701596 | 0,877295303 | 1,090762804 |
| <i>Arpc5l</i>        | 0,229536761  | 0,846652451 | 0,90125854  | 0,915427533 | 1,03895701  |
| <i>Kif2a</i>         | 0,227021834  | 0,80347492  | 0,90868087  | 0,897256389 | 1,022394731 |
| <i>Eif3j</i>         | 0,301054113  | 0,801297589 | 0,995913065 | 0,83313404  | 1,121723822 |
| <i>Gm9781</i>        | 0,301056616  | 0,798752761 | 0,993759032 | 0,833132605 | 1,121719938 |
| <i>Hemk1</i>         | 0,286105457  | 0,831647462 | 1,011334969 | 0,838555084 | 1,157660138 |
| <i>Map3k2</i>        | 0,29634752   | 0,753781603 | 0,969932204 | 0,870155409 | 1,113360756 |
| <i>Tiprl</i>         | 0,378885226  | 0,786795692 | 0,932615118 | 0,846103501 | 1,141022953 |
| <i>Mlxip</i>         | 0,416756133  | 0,760927443 | 0,94789612  | 0,885638655 | 1,131968756 |
| <i>Mettl11a</i>      | 0,383878047  | 0,85159982  | 0,888245364 | 0,834606574 | 1,10738687  |
| <i>Insig2</i>        | 0,32307009   | 0,851635675 | 0,975918459 | 0,918685856 | 1,066937849 |
| <i>Smg1</i>          | 0,357164822  | 0,843073323 | 0,943504502 | 0,891945257 | 1,054760764 |

|               |             |             |             |             |             |
|---------------|-------------|-------------|-------------|-------------|-------------|
| Zmynd11       | 0,356031656 | 0,844340332 | 0,961757084 | 0,891601575 | 1,15200675  |
| Arhgap17      | 0,398869846 | 0,920061114 | 0,989251794 | 0,911312193 | 1,104436904 |
| Omg           | 0,123077763 | 0,825875852 | 1,035985912 | 0,938630122 | 1,02478325  |
| Arih1         | 0,139737994 | 0,805657962 | 0,953063841 | 0,888980844 | 1,041042233 |
| Nt5c3         | 0,143195437 | 0,80355331  | 0,937373328 | 0,989553306 | 1,032657693 |
| Tbca          | 0,164972224 | 0,846745766 | 0,9448855   | 0,985896448 | 1,065056614 |
| Mrrf          | 0,18746116  | 0,905140099 | 1,036195784 | 0,945658626 | 1,044032156 |
| Nipbl         | 0,191757362 | 0,880840311 | 0,983294162 | 0,953493793 | 1,037005357 |
| Setd2         | 0,255207273 | 0,896129438 | 0,991234432 | 0,977734314 | 1,05570853  |
| Luc7l2        | 0,176652461 | 0,781676823 | 1,060898678 | 0,952174634 | 1,178557318 |
| Crebzf        | 0,19381953  | 0,778223362 | 0,97393946  | 0,985211386 | 1,138567637 |
| Abhd13        | 0,485649409 | 0,883856695 | 1,080458361 | 0,973638007 | 1,22419773  |
| Mtmr6         | 0,422678639 | 0,827623139 | 1,083557695 | 0,935549703 | 1,16968939  |
| Ctbp1         | 0,430286116 | 0,863434826 | 1,103620043 | 1,02446804  | 1,146002706 |
| Cops4         | 0,4052837   | 0,879410219 | 1,034291863 | 1,022551744 | 1,152070256 |
| Ube2k         | 0,418607817 | 0,863823033 | 1,057593983 | 1,089423926 | 1,177214087 |
| Zc3h7a        | 0,422416796 | 0,923630812 | 1,075184712 | 1,051465677 | 1,165359873 |
| Celf1         | 0,381780759 | 0,924985738 | 1,090580458 | 1,062508533 | 1,129637033 |
| Sar1b         | 0,478613788 | 0,89389778  | 0,993649139 | 0,909095708 | 1,203268406 |
| 9530068E07Rik | 0,484915736 | 0,965035064 | 1,014062432 | 0,88376332  | 1,180583455 |
| Zbtb8os       | 0,420257488 | 1,002712452 | 0,991802054 | 0,985934076 | 1,142017095 |
| Ppp2r5e       | 0,421223047 | 1,005190208 | 1,048949766 | 0,985889876 | 1,14159012  |
| D10Wsu102e    | 0,389728583 | 0,949333579 | 1,02249178  | 1,009151194 | 1,124883949 |
| Rbbp4         | 0,475645033 | 0,877572503 | 1,021462222 | 0,82580491  | 1,187662487 |
| Tmem80        | 0,507286428 | 0,85554031  | 0,979010584 | 0,819656329 | 1,155220772 |
| Wdr33         | 0,476887701 | 0,877084462 | 1,069587315 | 0,841560099 | 1,082549041 |
| Sdf2          | 0,429332352 | 0,847432826 | 1,0968026   | 0,808847522 | 1,199862965 |
| Ccdc59        | 0,335908221 | 0,784289911 | 1,086903938 | 0,867208445 | 1,234302652 |
| Car2          | 0,372475612 | 0,792301487 | 1,058035608 | 0,84381572  | 1,275064946 |
| Brpf1         | 0,30175678  | 0,877024401 | 1,021798698 | 0,82258383  | 1,223693364 |
| Zfp263        | 0,478249698 | 0,968680742 | 0,875876937 | 1,001249449 | 1,042384558 |
| Setd3         | 0,479882446 | 0,941642539 | 0,902841226 | 1,042360371 | 1,019042273 |
| Ctse          | 0,452349326 | 0,919961668 | 0,926259731 | 1,067550753 | 1,071933877 |
| Dcun1d1       | 0,408335526 | 0,989457237 | 0,935465018 | 1,029506837 | 0,990748249 |
| Hmbox1        | 0,477888318 | 0,986836623 | 0,947198044 | 1,071535595 | 0,980747399 |
| Tmem19        | 0,500281836 | 0,940212749 | 0,964014919 | 1,04356145  | 0,923905947 |
| Rasip1        | 0,549749147 | 0,958513766 | 1,07299841  | 1,093214162 | 1,047011808 |
| Xist          | 0,531484848 | 0,983548892 | 1,119829068 | 1,020460722 | 1,045054717 |
| 6530418L21Rik | 0,54673592  | 1,050620146 | 1,071061066 | 1,04509122  | 1,00918955  |
| Zcchc8        | 0,528850254 | 1,034506836 | 1,094798898 | 0,963609064 | 1,091256443 |
| Sec63         | 0,47405324  | 1,027863915 | 1,056879068 | 1,01582424  | 1,092684088 |
| Smarcb1       | 0,457112375 | 0,840039041 | 1,010417915 | 0,988038375 | 1,024239172 |
| Uhrf2         | 0,442229517 | 0,860919663 | 1,017357153 | 0,948409504 | 1,057797769 |
| Zfp326        | 0,451861774 | 0,895267419 | 1,008611572 | 1,042999649 | 1,021586363 |
| Hif1an        | 0,463982708 | 0,892985521 | 1,020644042 | 1,022643599 | 1,033986899 |
| Rmnd1         | 0,494362748 | 0,837530511 | 0,963405462 | 1,066527206 | 1,115818018 |
| Terf2         | 0,462243028 | 0,784133213 | 0,965205072 | 1,018370168 | 1,125447452 |
| Cetn3         | 0,394954189 | 0,8409754   | 0,935294311 | 1,027089945 | 1,018892156 |
| Adss          | 0,340321657 | 0,853248535 | 0,973944295 | 1,051617108 | 1,067317129 |
| Ubap1         | 0,38932851  | 0,910557864 | 0,937596389 | 1,029963144 | 1,028173389 |
| Apc           | 0,342699398 | 0,916464604 | 0,909786243 | 1,033215339 | 1,056333882 |

|                      |             |             |             |             |             |
|----------------------|-------------|-------------|-------------|-------------|-------------|
| <i>BC031781</i>      | 0,435169718 | 0,864001843 | 0,878761624 | 0,988101191 | 1,01521492  |
| <i>Ubr5</i>          | 0,451039879 | 0,813872978 | 0,866940131 | 0,937792383 | 1,01042715  |
| <i>Atxn2</i>         | 0,477689554 | 0,866305197 | 0,902195293 | 0,940967149 | 1,063177373 |
| <i>Slc7a6os</i>      | 0,47027421  | 0,843018927 | 0,860851177 | 1,085105207 | 1,016002707 |
| <i>Lats1</i>         | 0,373841358 | 1,001292984 | 0,96008133  | 0,917561445 | 1,173417189 |
| <i>Med13</i>         | 0,388750693 | 0,971519643 | 0,942585992 | 0,952525194 | 1,121735157 |
| <i>Rpl15</i>         | 0,372096989 | 1,0674976   | 0,937427641 | 0,896691642 | 1,105231592 |
| <i>Higd1a</i>        | 0,35615077  | 1,10835867  | 0,864992909 | 1,019040185 | 1,103923664 |
| <i>Traf6</i>         | 0,291037021 | 0,928285977 | 0,909330702 | 0,917079646 | 1,022763361 |
| <i>Hcls1</i>         | 0,267069228 | 0,948595097 | 0,916214616 | 0,927107885 | 1,017296263 |
| <i>Itsn2</i>         | 0,301316789 | 0,971347685 | 0,882678583 | 0,985083823 | 1,030010849 |
| <i>Mgll</i>          | 0,280310011 | 0,958983374 | 0,835441047 | 1,000472165 | 0,951525849 |
| <i>Snrpe</i>         | 0,259604431 | 1,034027097 | 0,886002055 | 0,848312721 | 0,93229495  |
| <i>Tuba3a</i>        | 0,320916982 | 1,041474384 | 0,900479918 | 0,873293636 | 0,983231251 |
| <i>Mettl17</i>       | 0,637762277 | 0,928307744 | 0,886610644 | 1,059760512 | 1,176168032 |
| <i>Ccdc45</i>        | 0,611592821 | 0,842329151 | 0,856423124 | 1,054966183 | 1,186191624 |
| <i>Vps52</i>         | 0,598296313 | 0,863819231 | 0,933930721 | 1,127499842 | 1,223111189 |
| <i>Adsl</i>          | 0,556588575 | 0,936319062 | 0,904439493 | 1,1536377   | 1,13804939  |
| <i>Gm15760</i>       | 0,566463723 | 0,928010156 | 0,881091715 | 1,162994489 | 1,174415575 |
| <i>Oasl2</i>         | 0,504928869 | 0,877935414 | 0,939855425 | 1,132425471 | 1,153822838 |
| <i>1110007C09Rik</i> | 0,584212267 | 0,801735706 | 0,74774429  | 1,116547129 | 1,103476857 |
| <i>Phf5a</i>         | 0,526438837 | 0,788106146 | 0,824186124 | 1,175344464 | 1,132703011 |
| <i>Gm12669</i>       | 0,428148767 | 0,84944105  | 0,855829644 | 0,901252155 | 1,168739558 |
| <i>Glrx3</i>         | 0,423767576 | 0,847741778 | 0,852698652 | 0,906519762 | 1,156996317 |
| <i>Tfam</i>          | 0,406788565 | 0,851422168 | 0,842456201 | 0,981335619 | 1,182209209 |
| <i>Bin1</i>          | 0,469573609 | 0,824233248 | 0,838217109 | 0,96390494  | 1,233248343 |
| <i>Tcea2</i>         | 0,443898159 | 0,91193702  | 0,894407889 | 0,904893823 | 1,239578278 |
| <i>Pdcl3</i>         | 0,499228243 | 0,865920537 | 0,784596132 | 0,989104743 | 1,149698481 |
| <i>Il18r1</i>        | 0,507563654 | 0,897965383 | 0,837252009 | 0,951928209 | 1,175626013 |
| <i>Phrf1</i>         | 0,519836464 | 0,870997211 | 0,833693315 | 1,023169647 | 1,092770943 |
| <i>Dhrs7</i>         | 0,482223016 | 0,914100039 | 0,702986532 | 0,98865196  | 1,181609653 |
| <i>Erh</i>           | 0,419099186 | 0,885526234 | 0,750763375 | 1,050358515 | 1,271317358 |
| <i>Nars</i>          | 0,354753864 | 0,913110178 | 0,81297788  | 1,125497192 | 1,039383635 |
| <i>2610528E23Rik</i> | 0,343495612 | 0,992696133 | 0,894598446 | 1,071162959 | 1,048408782 |
| <i>Capn2</i>         | 0,465398656 | 0,976447415 | 0,843386424 | 1,154604904 | 1,071688    |
| <i>Prkd3</i>         | 0,345982513 | 0,970481696 | 0,911543417 | 1,131014899 | 1,149299223 |
| <i>Gtf2a1</i>        | 0,386584805 | 0,949729674 | 0,867305217 | 1,060756507 | 1,209796323 |
| <i>Ell3</i>          | 0,538951139 | 1,045902273 | 0,776347288 | 1,029920574 | 1,057200078 |
| <i>Cog8</i>          | 0,479393745 | 1,135299047 | 0,799057497 | 1,029573085 | 1,073674628 |
| <i>Acot2</i>         | 0,472261228 | 1,011527944 | 0,750545109 | 1,090550515 | 0,980970764 |
| <i>Sltm</i>          | 0,412622298 | 1,012799147 | 0,824267711 | 1,046097366 | 0,96422879  |
| <i>1500004A13Rik</i> | 0,473306951 | 1,00901915  | 0,699548685 | 0,765889104 | 1,2591628   |
| <i>Samd10</i>        | 0,474501747 | 1,060513183 | 0,75298237  | 0,768547197 | 1,261846347 |
| <i>Ache</i>          | 0,532528192 | 1,198598838 | 0,788718568 | 0,896914035 | 1,219077901 |
| <i>Psmc3</i>         | 0,501109113 | 0,966523607 | 0,810511693 | 0,811881275 | 1,124263169 |
| <i>4930412O13Rik</i> | 0,529860805 | 1,103604016 | 0,790382779 | 0,802390993 | 1,091665912 |
| <i>BC090627</i>      | 0,510511591 | 1,117699827 | 0,946351688 | 0,798961249 | 1,166078171 |
| <i>0610010K14Rik</i> | 0,659270429 | 1,003066982 | 0,67643326  | 0,894163092 | 1,065730467 |
| <i>Dtx4</i>          | 0,587145087 | 0,977189423 | 0,7467804   | 0,921366967 | 1,099048616 |
| <i>Aktip</i>         | 0,556678297 | 0,967947047 | 0,731886014 | 0,723092356 | 1,052203308 |
| <i>0610007P14Rik</i> | 0,639056055 | 0,926831966 | 0,787675785 | 0,732776578 | 1,071467343 |

|                      |             |             |             |             |             |
|----------------------|-------------|-------------|-------------|-------------|-------------|
| <i>Pogz</i>          | 0,49276884  | 0,872691491 | 0,952778466 | 0,920070722 | 1,012397818 |
| <i>4933433P14Rik</i> | 0,534944349 | 0,898126354 | 0,973202079 | 0,914918128 | 1,033199339 |
| <i>BC002230</i>      | 0,525573852 | 0,893798686 | 0,859563725 | 0,962899172 | 1,028654415 |
| <i>Cdc42ep3</i>      | 0,548152153 | 0,86619242  | 0,860692143 | 0,939762045 | 1,025605493 |
| <i>Slc30a5</i>       | 0,628955324 | 0,88134989  | 0,921062052 | 0,97150894  | 1,050133561 |
| <i>Actr5</i>         | 0,566249131 | 0,901664309 | 0,932745244 | 0,949479032 | 1,084248563 |
| <i>Slc38a10</i>      | 0,641883111 | 0,888101123 | 0,929403861 | 0,90418516  | 1,101387532 |
| <i>Tatdn1</i>        | 0,570127428 | 0,84202832  | 1,003210831 | 0,888224461 | 1,128203102 |
| <i>AA960436</i>      | 0,555923793 | 0,84695645  | 1,009370041 | 0,963511909 | 1,099843433 |
| <i>Zfp266</i>        | 0,609015439 | 0,90072748  | 1,005128038 | 0,859572601 | 1,092567225 |
| <i>Txndc15</i>       | 0,609982588 | 0,904190941 | 0,996843625 | 0,879155738 | 1,093088976 |
| <i>Faf2</i>          | 0,563125302 | 0,856675445 | 0,979129577 | 0,875136757 | 1,054192811 |
| <i>Hsf4</i>          | 0,567725702 | 0,898495067 | 1,082340785 | 0,944943695 | 1,050140447 |
| <i>2700029M09Rik</i> | 0,662622865 | 0,927109167 | 0,951189998 | 1,090055012 | 1,078349316 |
| <i>Prkag2</i>        | 0,66092892  | 0,937655257 | 0,920226207 | 1,04519702  | 0,992521562 |
| <i>Dcaf8</i>         | 0,668225052 | 0,917027501 | 0,984922159 | 1,000453744 | 0,955170626 |
| <i>Brwd1</i>         | 0,631656696 | 0,884537505 | 1,013608915 | 1,025755566 | 0,989178542 |
| <i>Rcl1</i>          | 0,714511473 | 0,849553836 | 0,889651377 | 0,981528398 | 1,08467028  |
| <i>Lmtk3</i>         | 0,746906977 | 0,862665089 | 0,911890035 | 0,990226876 | 1,090610227 |
| <i>Acss2</i>         | 0,695840979 | 0,90665852  | 0,919164978 | 1,002732191 | 1,056677268 |
| <i>1700086O06Rik</i> | 0,689847056 | 0,851155316 | 0,95175541  | 1,030137887 | 1,108954463 |
| <i>Fam114a1</i>      | 0,685925001 | 0,842749441 | 0,892557579 | 0,958917637 | 1,023063903 |
| <i>Cldn14</i>        | 0,659405245 | 0,932682123 | 1,081570762 | 1,129999452 | 1,142112536 |
| <i>Morn1</i>         | 0,670756028 | 0,938808413 | 1,023859448 | 1,120449641 | 1,174189964 |
| <i>Dctn2</i>         | 0,67535303  | 0,938437003 | 0,949640409 | 1,0916646   | 1,168626532 |
| <i>Aff3</i>          | 0,658826465 | 0,965208466 | 0,987410555 | 1,058118374 | 1,196965635 |
| <i>Pear1</i>         | 0,769209439 | 0,841922209 | 0,915766662 | 1,127598215 | 1,135072593 |
| <i>Cnnm3</i>         | 0,758671016 | 0,812315623 | 1,023251713 | 1,098859523 | 1,127224131 |
| <i>Hbp1</i>          | 0,521164034 | 0,837205707 | 1,004213077 | 1,127941127 | 1,055813505 |
| <i>Gpsm2</i>         | 0,579713699 | 0,847626059 | 1,010006398 | 1,034371655 | 1,022121882 |
| <i>Ppp2r4</i>        | 0,599432991 | 0,835991104 | 0,902378481 | 1,087834196 | 1,12942157  |
| <i>Ubr2</i>          | 0,557684107 | 0,807387263 | 0,927489136 | 1,042190478 | 1,147802827 |
| <i>1110059E24Rik</i> | 0,625595472 | 0,772991998 | 0,907324487 | 1,047352118 | 1,086832833 |
| <i>Ndufa13</i>       | 0,494036454 | 0,707867973 | 1,02748373  | 0,969057279 | 1,092312789 |
| <i>Sdhd</i>          | 0,545607054 | 0,698912985 | 0,904763721 | 0,990039513 | 1,114286002 |
| <i>Pin1</i>          | 0,572695809 | 0,724676245 | 1,014614424 | 0,976860691 | 1,197295501 |
| <i>Mlycd</i>         | 0,581764344 | 0,700942727 | 0,980729321 | 0,913623585 | 1,205971772 |
| <i>Nhlrc3</i>        | 0,548628081 | 0,708286382 | 0,961080988 | 0,915199948 | 1,077525094 |
| <i>Nudt9</i>         | 0,547362806 | 0,687443035 | 0,955579999 | 0,876456417 | 1,111304895 |
| <i>4930555I21Rik</i> | 0,495189318 | 0,692546003 | 0,958322805 | 0,857163594 | 1,114954215 |
| <i>Tprkb</i>         | 0,516968529 | 0,67184523  | 0,919295453 | 0,83783437  | 1,118230529 |
| <i>Nucks1</i>        | 0,597178719 | 0,618764833 | 0,899682051 | 0,854780036 | 1,101086324 |
| <i>Gmnn</i>          | 0,608335146 | 0,591412377 | 0,895536531 | 0,942796029 | 1,1762846   |
| <i>Zfp46</i>         | 0,643334252 | 0,58238851  | 0,955673712 | 1,033629908 | 1,149423224 |
| <i>Tnfrsf26</i>      | 0,578698795 | 0,665969228 | 0,804716477 | 1,034713457 | 1,227945129 |
| <i>4933421O10Rik</i> | 0,595284648 | 0,649997181 | 0,776491976 | 1,061415969 | 1,174683423 |
| <i>Prkaa1</i>        | 0,39074463  | 0,842447615 | 1,035398355 | 0,977126209 | 1,276184945 |
| <i>Mtmr3</i>         | 0,346110232 | 0,83871491  | 1,01617476  | 0,962503662 | 1,225114945 |
| <i>Dhx9</i>          | 0,396588041 | 0,805199849 | 1,068266349 | 1,043339272 | 1,267375782 |
| <i>Pias1</i>         | 0,404584952 | 0,84728118  | 1,111668875 | 1,015743213 | 1,256364292 |
| <i>Ube2l3</i>        | 0,360324151 | 0,762393524 | 1,071821097 | 1,01573664  | 1,33190004  |

|                      |             |             |             |             |             |
|----------------------|-------------|-------------|-------------|-------------|-------------|
| <i>Eps15l1</i>       | 0,418431511 | 0,734002923 | 1,027700147 | 1,02096669  | 1,301950336 |
| <i>Ip6k1</i>         | 0,39627682  | 0,837872304 | 1,073119578 | 1,049200826 | 1,398295705 |
| <i>Clk2</i>          | 0,480437057 | 0,910549104 | 1,014799386 | 0,989771926 | 1,389705595 |
| <i>Slc10a1</i>       | 0,494063483 | 0,852321961 | 1,042469157 | 1,160047364 | 1,239990751 |
| <i>Fkbp3</i>         | 0,504646495 | 0,832250513 | 1,123104471 | 1,145921269 | 1,300087418 |
| <i>Myst2</i>         | 0,431027585 | 0,872322933 | 1,068978929 | 1,064767622 | 1,271448883 |
| <i>Eif3d</i>         | 0,451926956 | 0,930473401 | 1,069762865 | 1,05147919  | 1,299891791 |
| <i>Trim26</i>        | 0,439897439 | 0,890664668 | 1,127876092 | 1,14766598  | 1,202845944 |
| <i>Dido1</i>         | 0,424399284 | 0,851639495 | 1,14992676  | 1,113410632 | 1,23257971  |
| <i>Tnks</i>          | 0,384556464 | 0,900942885 | 1,138688165 | 1,125107812 | 1,238298603 |
| <i>Pigm</i>          | 0,447854366 | 0,865320878 | 1,161098295 | 1,182822652 | 1,243995646 |
| <i>Adar</i>          | 0,50124133  | 0,902306177 | 1,199781143 | 1,113145162 | 1,248609359 |
| <i>Dbnl</i>          | 0,543142477 | 0,767335019 | 0,903864754 | 1,110537713 | 1,332919173 |
| <i>Sf3a2</i>         | 0,531245034 | 0,827538836 | 0,913568564 | 1,108847587 | 1,335264228 |
| <i>D830031N03Rik</i> | 0,504830382 | 0,747951092 | 1,003197972 | 1,056344283 | 1,334445298 |
| <i>Rrp1b</i>         | 0,471665569 | 0,857430531 | 0,891810019 | 1,077929344 | 1,255171829 |
| <i>Orm2</i>          | 0,436819332 | 0,778838092 | 0,933083869 | 1,15324674  | 1,287887994 |
| <i>Krr1</i>          | 0,440168799 | 0,803342669 | 0,882149244 | 1,146143868 | 1,326021223 |
| <i>Lonp1</i>         | 0,362775878 | 0,756900006 | 0,911260724 | 1,1926039   | 1,272008789 |
| <i>Taf9</i>          | 0,542125214 | 0,865890257 | 1,132804147 | 0,90905746  | 1,322011673 |
| <i>Prpf4b</i>        | 0,522073129 | 0,876382771 | 1,089573871 | 0,862535372 | 1,27764634  |
| <i>Cacybp</i>        | 0,550249005 | 0,752542062 | 1,125688254 | 0,93017654  | 1,221407685 |
| <i>Stat4</i>         | 0,579755095 | 0,842650612 | 0,989589842 | 0,957120818 | 1,337589587 |
| <i>Xpnpep1</i>       | 0,502743909 | 0,836814772 | 0,96283231  | 0,978377825 | 1,253996298 |
| <i>Nfrkb</i>         | 0,536279728 | 0,863684228 | 1,073944435 | 1,028596148 | 1,289152882 |
| <i>Trim27</i>        | 0,52784294  | 0,830548411 | 1,049087708 | 1,011621273 | 1,335336706 |
| <i>Necap2</i>        | 0,684902871 | 0,886875744 | 0,98971024  | 1,007957601 | 1,269306543 |
| <i>Stat2</i>         | 0,663544349 | 0,931032509 | 0,989176355 | 1,026579317 | 1,264634678 |
| <i>Extl1</i>         | 0,654525715 | 0,90860587  | 1,021744352 | 1,067289967 | 1,223834683 |
| <i>Plekhh2</i>       | 0,60469605  | 0,920150871 | 1,010874782 | 1,069254318 | 1,15616672  |
| <i>Dync1li1</i>      | 0,560302189 | 0,895008415 | 1,005877151 | 1,08588108  | 1,220720948 |
| <i>Wash</i>          | 0,650986873 | 0,808186803 | 1,056570292 | 1,023370699 | 1,241194683 |
| <i>Hadh</i>          | 0,609374253 | 0,829861612 | 1,033516362 | 0,940579671 | 1,244495667 |
| <i>Mdm4</i>          | 0,624569378 | 0,79106814  | 0,960342711 | 0,995900733 | 1,15852188  |
| <i>Clcn4-2</i>       | 0,624192408 | 0,832099863 | 1,026528539 | 0,991486607 | 1,130263032 |
| <i>Sqstm1</i>        | 0,262586878 | 0,637795868 | 0,918288353 | 0,727899441 | 1,000565786 |
| <i>Fam13b</i>        | 0,273127434 | 0,64270107  | 0,982099386 | 0,770518026 | 1,045885274 |
| <i>Timm23</i>        | 0,168479402 | 0,589982994 | 0,898845835 | 0,783573582 | 1,077378935 |
| <i>Otud4</i>         | 0,235938737 | 0,598072049 | 0,897624841 | 0,776674008 | 1,037083463 |
| <i>Trit1</i>         | 0,292836535 | 0,58938152  | 0,854604971 | 0,662763635 | 1,028670808 |
| <i>Car15</i>         | 0,324506765 | 0,539586996 | 0,854840156 | 0,722305594 | 1,083981038 |
| <i>Med12</i>         | 0,217918047 | 0,748850924 | 0,915850719 | 0,655746278 | 1,000563759 |
| <i>Itgb1bp1</i>      | 0,22063468  | 0,747592971 | 0,940222855 | 0,645954305 | 1,047205539 |
| <i>Gabpb1</i>        | 0,237599296 | 0,733864449 | 0,899265196 | 0,730658146 | 1,041756065 |
| <i>Dnajb6</i>        | 0,236991098 | 0,671904567 | 0,885338272 | 0,840590692 | 1,156525962 |
| <i>9030617003Rik</i> | 0,287895976 | 0,739391488 | 0,869882271 | 0,735675125 | 1,175053784 |
| <i>Pfdn2</i>         | 0,286150346 | 0,761372465 | 0,785398873 | 0,773004998 | 1,242485399 |
| <i>Wdr4</i>          | 0,294267804 | 0,687325036 | 0,747307838 | 0,778107722 | 1,198470275 |
| <i>Naa16</i>         | 0,192921308 | 0,720065866 | 0,828216827 | 0,892976397 | 1,085627885 |
| <i>Rpe</i>           | 0,185214832 | 0,711062272 | 0,820296651 | 0,81621815  | 1,105417505 |
| <i>Zfp60</i>         | 0,176836934 | 0,660499929 | 0,882594499 | 0,834726561 | 1,050190283 |

|               |              |             |             |             |             |
|---------------|--------------|-------------|-------------|-------------|-------------|
| Zfp868        | 0,140978087  | 0,684000102 | 0,840675524 | 0,806231301 | 1,0666615   |
| Utrn          | 0,267362597  | 0,727326221 | 0,822855649 | 0,79424232  | 1,0093188   |
| Med26         | 0,25485659   | 0,681301534 | 0,899766117 | 0,823065625 | 1,016773018 |
| Ank           | 0,252756079  | 0,668220405 | 0,754367972 | 0,895476803 | 1,004713911 |
| Scap          | 0,226776989  | 0,735900448 | 0,726936789 | 0,826664802 | 1,065690945 |
| Rnf115        | 0,189741527  | 0,560469166 | 0,77107957  | 0,800529574 | 1,044452151 |
| 2310004124Rik | 0,257775072  | 0,545909574 | 0,741422681 | 0,874195284 | 1,012072816 |
| Eif3e         | 0,033190995  | 0,686467106 | 0,948542344 | 0,904025409 | 1,075144961 |
| Cdk13         | 0,058854937  | 0,635365167 | 0,919968577 | 0,876438289 | 1,009903504 |
| Wnk1          | 0,019876514  | 0,593133056 | 0,981126578 | 0,844060628 | 1,067078765 |
| Ssb           | -0,047453968 | 0,744168356 | 1,001806536 | 0,808064933 | 1,002507692 |
| Zfx           | 0,056337925  | 0,746237207 | 0,978177995 | 0,785606139 | 1,086942628 |
| Zfp958        | -0,050026123 | 0,753868231 | 0,856218761 | 0,68859759  | 1,006473062 |
| Ssbp1         | -0,162312902 | 0,669122227 | 0,788152225 | 0,704917711 | 1,057353515 |
| Ankrd61       | 0,135257115  | 0,655202487 | 0,84745199  | 0,783401428 | 1,159360109 |
| Ociad1        | 0,126610405  | 0,698639322 | 0,806635953 | 0,828057047 | 1,162098553 |
| Nol9          | 0,119358811  | 0,689811647 | 0,875490729 | 0,798906678 | 1,237268175 |
| Eif3a         | -0,072257816 | 0,647681972 | 0,846389359 | 0,803034605 | 1,195549053 |
| Uqcrfs1       | 0,02439891   | 0,636421992 | 0,824978159 | 0,776196674 | 1,226244993 |
| Ythdf3        | 0,024747623  | 0,637220594 | 0,79756186  | 0,852109162 | 1,056651705 |
| Rbm33         | 0,098486955  | 0,640456248 | 0,793384683 | 0,902041989 | 1,05059942  |
| Zcchc9        | 0,103491304  | 0,647403826 | 0,777777095 | 0,794767157 | 1,067019823 |
| Zbtb11        | 0,081136593  | 0,686334535 | 0,723958394 | 0,90821207  | 1,116705975 |
| Pcbp2         | 0,13413219   | 0,705250337 | 0,769531908 | 0,883882402 | 1,107423842 |
| Cyp20a1       | 0,057762653  | 0,692062674 | 1,021378285 | 0,796934739 | 1,174777416 |
| Sfrp2         | 0,05623765   | 0,759497958 | 1,015221163 | 0,827499856 | 1,218772204 |
| Slc2a4rg-ps   | -0,030618375 | 0,593640603 | 1,062741333 | 0,907083586 | 1,196700497 |
| Rdh14         | 0,160004592  | 0,697653882 | 1,07606542  | 0,889809181 | 1,066771002 |
| Ndufa8        | 0,150041813  | 0,624988911 | 1,08722486  | 0,964530246 | 1,130601814 |
| Zfp91         | 0,12156254   | 0,613870233 | 1,002646862 | 0,922667464 | 1,128506891 |
| U05342        | 0,118716367  | 0,621206789 | 0,958915656 | 0,901340586 | 1,084835994 |
| Ggps1         | 0,184504411  | 0,6536397   | 0,966272491 | 0,886696807 | 1,123441319 |
| Gm16853       | 0,16958951   | 0,594202996 | 1,1545018   | 0,770890158 | 1,18432861  |
| Zfp566        | 0,172466398  | 0,62581123  | 1,040361484 | 0,723809037 | 1,250852085 |
| Ppat          | 0,061497136  | 0,594085263 | 0,992859583 | 0,718377895 | 1,158097566 |
| Chst2         | 0,118250422  | 0,871202625 | 0,9088917   | 0,914141421 | 1,165450896 |
| Ptpn2         | 0,197936497  | 0,843455353 | 0,901936761 | 0,969908373 | 1,177299364 |
| Ube2z         | 0,024021331  | 0,825874841 | 0,87855596  | 0,91607725  | 1,148357967 |
| Dcun1d3       | 0,107458593  | 0,857442496 | 0,851907223 | 0,975761506 | 1,033822398 |
| Ndufv2        | 0,126922994  | 0,85763099  | 0,792482972 | 0,948748154 | 1,03811859  |
| 1810031K17Rik | 0,177615743  | 0,895609342 | 0,833519482 | 1,00733971  | 1,022856955 |
| Gpr87         | 0,132055132  | 0,779340226 | 0,796759593 | 0,83988766  | 1,040801845 |
| Fam108b       | 0,101836343  | 0,747206378 | 0,808209634 | 0,856252245 | 1,047046706 |
| Pspc1         | 0,118741965  | 0,7596307   | 0,859113222 | 0,902507459 | 1,087129954 |
| 9330179D12Rik | 0,152288273  | 0,736591628 | 0,915006411 | 0,800927911 | 1,062305176 |
| Nptn          | 0,105354365  | 0,700155259 | 0,936541337 | 0,826933378 | 1,016969917 |
| A430084P05Rik | 0,136213862  | 0,819567706 | 0,751376808 | 0,794628724 | 1,074730502 |
| Actr6         | 0,194911858  | 0,822316509 | 0,772270351 | 0,808619201 | 1,021874763 |
| Sft2d1        | 0,215820423  | 0,807237877 | 0,82645279  | 0,860932445 | 1,130751129 |
| Strn          | 0,194068397  | 0,785842118 | 0,850765798 | 0,812106682 | 1,132262686 |
| Setx          | 0,036294899  | 0,766648375 | 0,846358872 | 1,103450398 | 1,103043811 |

|                      |              |             |             |             |             |
|----------------------|--------------|-------------|-------------|-------------|-------------|
| <i>Seh1l</i>         | 0,063627081  | 0,860954399 | 0,80123238  | 1,080756765 | 1,002035395 |
| <i>Elavl1</i>        | 0,094894445  | 0,745197698 | 0,882279587 | 0,979339561 | 1,021103468 |
| <i>5830415F09Rik</i> | 0,028736928  | 0,692449116 | 0,907735721 | 1,034448779 | 0,936697559 |
| <i>Arf4</i>          | -0,035673397 | 0,891029007 | 0,943039175 | 0,81855973  | 1,036557233 |
| <i>Gnpnat1</i>       | 0,025640455  | 0,885423611 | 1,059720132 | 0,794176588 | 0,965953592 |
| <i>Gm9895</i>        | 0,240738742  | 0,472975842 | 1,018672126 | 0,795182584 | 0,743690103 |
| <i>Dolk</i>          | 0,276432771  | 0,483693485 | 1,089305252 | 0,824796937 | 0,934595396 |
| <i>Acadvl</i>        | 0,488104068  | 0,508643652 | 1,023349223 | 0,851785025 | 0,941215422 |
| <i>Eif3l</i>         | 0,303044769  | 0,4236025   | 0,862411419 | 0,898994573 | 1,051660532 |
| <i>1700020D05Rik</i> | 0,344922081  | 0,44128053  | 0,905573396 | 1,01999538  | 1,045345857 |
| <i>Cox5a</i>         | 0,239519013  | 0,393101991 | 1,011790432 | 0,956826615 | 1,129423519 |
| <i>Ogfr</i>          | 0,333100985  | 0,929042373 | 0,58126573  | 0,966626445 | 1,152904041 |
| <i>Ppp1r11</i>       | 0,409030932  | 0,956916342 | 0,639442562 | 0,93620222  | 1,051567916 |
| <i>Chrnbl</i>        | 0,241600006  | 0,910270122 | 0,534353902 | 1,027970855 | 1,013623443 |
| <i>Grsf1</i>         | 0,197036327  | 0,939560014 | 0,658586807 | 0,817063989 | 1,098749081 |
| <i>C530005A16Rik</i> | 0,225923788  | 0,875972961 | 0,713572679 | 0,817934826 | 1,054962002 |
| <i>Slu7</i>          | 0,110332388  | 0,790963418 | 0,66325097  | 0,819743798 | 1,104658964 |
| <i>Ghrl</i>          | 0,223737666  | 0,911176592 | 0,793405196 | 0,972203037 | 1,213667939 |
| <i>Slain2</i>        | 0,251865061  | 0,887406582 | 0,797853813 | 1,042181699 | 1,162047395 |
| <i>Zfp384</i>        | 0,308125842  | 0,893963629 | 0,885393645 | 0,972037125 | 1,195332187 |
| <i>Lrp6</i>          | 0,274666321  | 0,875345098 | 0,906308364 | 1,072624521 | 1,09152627  |
| <i>Atxn7</i>         | 0,279472027  | 0,867882688 | 0,904484086 | 1,036003761 | 1,065159205 |
| <i>Esyt2</i>         | 0,266808429  | 0,820005068 | 0,873483302 | 1,017337053 | 1,095125561 |
| <i>4930549G23Rik</i> | 0,224224645  | 0,869064104 | 0,823732305 | 1,099317282 | 1,075147863 |
| <i>Gmpr2</i>         | 0,258112451  | 0,777335655 | 0,707350775 | 1,021468976 | 1,011795469 |
| <i>Eif2d</i>         | 0,22148272   | 0,855647962 | 0,69564299  | 1,088240739 | 1,053280762 |
| <i>Osbpl9</i>        | 0,283945674  | 0,815552468 | 0,781345342 | 1,10157658  | 0,978842358 |
| <i>Psmg2</i>         | 0,253561822  | 0,812231042 | 0,80347365  | 1,065718109 | 1,027492132 |
| <i>Pgd</i>           | 0,425414825  | 0,690616531 | 0,734824802 | 1,064791715 | 1,113449388 |
| <i>Nipal3</i>        | 0,435845338  | 0,661896023 | 0,702924133 | 1,010375303 | 1,162169404 |
| <i>Tti2</i>          | 0,479264494  | 0,704806751 | 0,61657981  | 0,983528701 | 1,18355673  |
| <i>Cyp2s1</i>        | 0,403711967  | 0,623772298 | 0,590592777 | 1,077489458 | 1,070464768 |
| <i>Mrpl41</i>        | 0,506284599  | 0,587745215 | 0,602627201 | 1,073964215 | 1,049835403 |
| <i>Gatad1</i>        | 0,38465603   | 0,765247949 | 0,615485223 | 1,001148731 | 0,979627827 |
| <i>Ssh1</i>          | 0,482723141  | 0,773225667 | 0,570591837 | 1,023578565 | 0,971822247 |
| <i>Prmt6</i>         | 0,334742707  | 0,622407917 | 0,746846016 | 1,158234668 | 0,988202499 |
| <i>Rnf123</i>        | 0,40617597   | 0,609196179 | 0,785630179 | 1,048368939 | 1,00795548  |
| <i>Pofut2</i>        | 0,485158891  | 0,667129627 | 0,695872434 | 1,151664265 | 0,925495862 |
| <i>Mlx</i>           | 0,315851725  | 0,704835413 | 0,704576311 | 1,019001182 | 0,91156451  |
| <i>Acbd3</i>         | 0,390857085  | 0,706583773 | 0,733327124 | 1,002617289 | 0,900633955 |
| <i>Ogdh</i>          | 0,408037872  | 0,727934176 | 0,85171804  | 0,836030851 | 1,089113834 |
| <i>Smc3</i>          | 0,392853976  | 0,75388648  | 0,853445357 | 0,799968223 | 1,069195137 |
| <i>Trappc10</i>      | 0,424700138  | 0,769722474 | 0,831250684 | 0,860929725 | 1,030244759 |
| <i>P4ha1</i>         | 0,400557998  | 0,730622484 | 0,905806246 | 0,85283832  | 1,000713738 |
| <i>Adipor1</i>       | 0,422280453  | 0,728665209 | 0,943257984 | 0,887089282 | 1,024024516 |
| <i>Crcp</i>          | 0,418528781  | 0,697007489 | 0,937562595 | 0,848395792 | 1,060596265 |
| <i>Ttc15</i>         | 0,5033271    | 0,689481259 | 0,804454475 | 0,822403685 | 1,0037364   |
| <i>Ppargc1b</i>      | 0,500257363  | 0,70984444  | 0,876284314 | 0,75482106  | 1,035971566 |
| <i>Kansl3</i>        | 0,341650602  | 0,736038844 | 0,868577194 | 0,739245447 | 1,032432927 |
| <i>1110034A24Rik</i> | 0,402729981  | 0,72627299  | 0,869707437 | 0,702114084 | 1,040031968 |
| <i>Zfp828</i>        | 0,370432562  | 0,664223472 | 0,787922062 | 0,858673728 | 1,044458806 |

|                      |             |             |             |             |             |
|----------------------|-------------|-------------|-------------|-------------|-------------|
| <i>9530027J09Rik</i> | 0,383870143 | 0,697258805 | 0,757388573 | 0,831879525 | 1,040946511 |
| <i>Numa1</i>         | 0,338605846 | 0,684056304 | 0,720049811 | 0,869907014 | 1,115458404 |
| <i>Lsm11</i>         | 0,373878027 | 0,746867741 | 0,751306095 | 0,790959996 | 1,126299973 |
| <i>Baz1a</i>         | 0,410502508 | 0,718944323 | 0,750252767 | 0,761851548 | 1,11752054  |
| <i>Clpp</i>          | 0,508622394 | 0,686292013 | 0,732300608 | 0,888779762 | 1,109909393 |
| <i>Kdelr2</i>        | 0,430213399 | 0,647698731 | 0,739118389 | 0,868709885 | 1,176318761 |
| <i>Nudc</i>          | 0,369107701 | 0,58719988  | 0,814583246 | 0,887937023 | 1,15619901  |
| <i>Scp2</i>          | 0,382432067 | 0,641925797 | 0,829714764 | 0,869212927 | 1,163803285 |
| <i>Crim1</i>         | 0,337514878 | 0,596210558 | 0,913124565 | 0,857436448 | 1,140464889 |
| <i>Mocs2</i>         | 0,376511707 | 0,672033407 | 0,827918685 | 0,896501031 | 1,101699336 |
| <i>Exosc10</i>       | 0,370419532 | 0,651180073 | 0,817097744 | 0,871978332 | 1,105584574 |
| <i>Surf2</i>         | 0,353497829 | 0,659422252 | 0,904173876 | 0,894307424 | 1,06997335  |
| <i>Nub1</i>          | 0,362895982 | 0,546954382 | 0,856474977 | 0,827556299 | 1,032885858 |
| <i>Rpain</i>         | 0,430010492 | 0,587490723 | 0,908367588 | 0,792163415 | 1,130821595 |
| <i>Ywhaq</i>         | 0,391685454 | 0,516920283 | 0,896724355 | 0,928826716 | 1,117623996 |
| <i>Pigw</i>          | 0,349569805 | 0,543919314 | 0,910198821 | 0,929167327 | 1,121630336 |
| <i>Fam71f1</i>       | 0,378082934 | 0,570905741 | 0,959811575 | 0,956036489 | 1,026300121 |
| <i>Azin1</i>         | 0,249491291 | 0,682620779 | 0,909393579 | 1,027054629 | 0,85409223  |
| <i>Ntf5</i>          | 0,426671435 | 0,64442944  | 0,892303223 | 1,043316264 | 0,872239182 |
| <i>Cdc5l</i>         | 0,475688213 | 0,809234613 | 0,886056126 | 1,000489778 | 0,925913194 |
| <i>Cdr2</i>          | 0,475388633 | 0,719683725 | 0,803249832 | 1,027406435 | 0,945599327 |
| <i>Fam60a</i>        | 0,364381741 | 0,646623075 | 0,868978313 | 1,028350108 | 1,138996477 |
| <i>Reck</i>          | 0,34384198  | 0,640002128 | 0,842934992 | 0,989181115 | 1,066416739 |
| <i>Zfp51</i>         | 0,283115283 | 0,691051726 | 0,818404148 | 1,003639175 | 1,121454432 |
| <i>Hadhb</i>         | 0,233972834 | 0,665918213 | 0,923091184 | 0,97270247  | 1,125855432 |
| <i>4933434E20Rik</i> | 0,262170331 | 0,63823159  | 0,804772027 | 0,991594402 | 1,218693747 |
| <i>Cpsf3l</i>        | 0,215264031 | 0,6990025   | 0,816399057 | 1,011032969 | 1,206599999 |
| <i>Usp48</i>         | 0,375107068 | 0,669600814 | 0,885391657 | 0,882249853 | 1,252575239 |
| <i>Ttf1</i>          | 0,376734536 | 0,738346225 | 0,819112988 | 0,974695426 | 1,238526264 |
| <i>Gpcpd1</i>        | 0,411809152 | 0,572000047 | 0,83315924  | 0,991461687 | 1,208597519 |
| <i>Zbtb39</i>        | 0,357073511 | 0,613898005 | 0,987154085 | 1,030650554 | 1,261287263 |
| <i>Rhebl1</i>        | 0,366472102 | 0,659535075 | 1,001011237 | 0,966209509 | 1,235822496 |
| <i>Naa30</i>         | 0,274826926 | 0,681245813 | 0,994344889 | 1,029009748 | 1,269958741 |
| <i>Med18</i>         | 0,3771644   | 0,653933045 | 1,038756937 | 0,948248411 | 1,145582396 |
| <i>Zyg11b</i>        | 0,371607048 | 0,833167057 | 0,949802877 | 1,0143205   | 1,228034701 |
| <i>Akap8l</i>        | 0,369738418 | 0,793447998 | 0,938745785 | 1,015974761 | 1,270721892 |
| <i>Atp2a2</i>        | 0,360817093 | 0,774505129 | 0,938511697 | 0,936683505 | 1,24879163  |
| <i>1700026L06Rik</i> | 0,366641354 | 0,744575373 | 0,922079531 | 1,07499534  | 1,209949097 |
| <i>Psmc2</i>         | 0,281667044 | 0,794241805 | 1,031396629 | 0,95913413  | 1,213497768 |
| <i>Ddx42</i>         | 0,239722391 | 0,796250024 | 1,018053226 | 0,913324564 | 1,190961209 |
| <i>Ogt</i>           | 0,242653429 | 0,883333123 | 1,07400364  | 0,916161781 | 1,215808932 |
| <i>Crkl</i>          | 0,263485872 | 0,894853366 | 0,960030481 | 0,884669423 | 1,28520876  |
| <i>Uqcrc1</i>        | 0,229977559 | 0,928504531 | 0,96095256  | 0,962525144 | 1,236313416 |
| <i>Rapgef2</i>       | 0,216958398 | 0,774406743 | 0,95826242  | 0,99902415  | 1,310296575 |
| <i>Sec13</i>         | 0,209362982 | 0,762069611 | 0,984103867 | 1,043825319 | 1,240950774 |
| <i>Wdr37</i>         | 0,115732091 | 0,730036035 | 0,951351621 | 0,961324533 | 1,280353423 |
| <i>Atg14</i>         | 0,155416769 | 0,812790117 | 0,888702168 | 0,968555113 | 1,239367321 |
| <i>Mtfr1</i>         | 0,160455742 | 0,798046485 | 0,888033038 | 1,043496272 | 1,231785877 |
| <i>Axin1</i>         | 0,222225845 | 0,812034283 | 1,159070903 | 1,083114478 | 1,258119162 |
| <i>Shfm1</i>         | 0,176030244 | 0,849856811 | 1,106088208 | 1,144796694 | 1,319312123 |
| <i>Rad23b</i>        | 0,225693235 | 0,792040797 | 1,103923337 | 1,036682736 | 1,376759637 |



|                      |              |             |             |             |             |
|----------------------|--------------|-------------|-------------|-------------|-------------|
| <i>Shoc2</i>         | 0,159619011  | 0,817219058 | 1,050772246 | 1,037623739 | 1,242670895 |
| <i>Trim33</i>        | 0,205236879  | 0,756341141 | 1,062193234 | 1,084023278 | 1,300532865 |
| <i>Arih2</i>         | 0,249492648  | 0,84436272  | 0,961575162 | 1,157095929 | 1,263908286 |
| <i>Tnks2</i>         | 0,26469491   | 0,854889184 | 0,978109415 | 1,145412327 | 1,228784335 |
| <i>Fam19a3</i>       | 0,271043935  | 0,823632856 | 0,929684863 | 1,07674239  | 1,230806037 |
| <i>Naa15</i>         | 0,275030083  | 0,936066497 | 1,006903412 | 1,06963444  | 1,297023215 |
| <i>Socs4</i>         | 0,294479541  | 0,917447718 | 0,990253616 | 1,115487653 | 1,312848101 |
| <i>Sfr1</i>          | -0,012243258 | 0,824500247 | 1,051011079 | 1,031640915 | 1,422165459 |
| <i>Nxf1</i>          | 0,04216203   | 0,879270886 | 1,051883777 | 1,008452807 | 1,430424509 |
| <i>Tle4</i>          | -0,037192211 | 0,907312271 | 1,082968341 | 1,066495933 | 1,428646195 |
| <i>Cd53</i>          | -0,459056202 | 0,886506785 | 1,194537569 | 1,039089056 | 1,322666191 |
| <i>B630005N14Rik</i> | -0,066451456 | 0,971659529 | 1,067349193 | 1,039563788 | 1,302362493 |
| <i>Pold4</i>         | 0,091881098  | 0,99809451  | 1,000699333 | 1,108052085 | 1,323455894 |
| <i>Smc6</i>          | 0,000527529  | 1,065465208 | 1,042418504 | 1,246344161 | 1,242314548 |
| <i>Inpp4b</i>        | -0,124317579 | 1,115122588 | 0,967625861 | 1,228656144 | 1,060900339 |
| <i>Usp38</i>         | 0,116109339  | 0,995442517 | 1,09246583  | 1,160532961 | 1,118903199 |
| <i>1110020A21Rik</i> | 0,124119323  | 0,999799822 | 1,148356215 | 1,124932923 | 1,08595178  |
| <i>Xpo1</i>          | 0,095595817  | 0,884840888 | 0,995058651 | 1,057086334 | 1,15144604  |
| <i>Crebbp</i>        | 0,114364954  | 0,885531859 | 0,987715667 | 0,970275321 | 1,122842877 |
| <i>Rasa1</i>         | -0,105085716 | 0,892410417 | 0,974163812 | 0,990019346 | 1,146011931 |
| <i>Sept7</i>         | -0,016653665 | 0,898045671 | 1,026776802 | 1,097409685 | 1,122096253 |
| <i>Plekha1</i>       | 0,034986339  | 0,897831184 | 0,984084415 | 1,134767041 | 1,104128812 |
| <i>Gm13293</i>       | -0,009135995 | 0,908880431 | 0,998042061 | 1,062480936 | 1,029313309 |
| <i>Galc</i>          | 0,080624726  | 1,057006849 | 0,984563212 | 0,976535867 | 1,029646362 |
| <i>4930573O16Rik</i> | -0,082551987 | 1,059224772 | 0,923476736 | 1,024557655 | 1,031117249 |
| <i>1700110K17Rik</i> | 0,045006224  | 1,159765869 | 1,133780449 | 0,933037666 | 1,205804447 |
| <i>Tmem168</i>       | 0,073051932  | 1,040927134 | 0,987633625 | 0,917679278 | 1,175060245 |
| <i>Tpm4</i>          | 0,076129463  | 0,750036817 | 1,014672499 | 1,122462367 | 1,336948914 |
| <i>Fam103a1</i>      | 0,049518139  | 0,668688647 | 1,086590185 | 1,052266452 | 1,284875281 |
| <i>Foxp3</i>         | 0,117265626  | 0,630303103 | 1,100587316 | 1,151154197 | 1,404226218 |
| <i>Hnrnp2</i>        | 0,069826116  | 0,591465522 | 1,021083359 | 1,045220877 | 1,391521204 |
| <i>Atp11b</i>        | 0,144787219  | 0,594375108 | 0,925996889 | 1,076436865 | 1,427885099 |
| <i>Tatdn2</i>        | 0,004503102  | 0,691064785 | 1,082540853 | 1,382486476 | 1,445962795 |
| <i>Rps2</i>          | 0,094237946  | 0,602612724 | 1,07677719  | 1,20849134  | 1,149462499 |
| <i>Snhg1</i>         | 0,228482032  | 0,592957553 | 0,974248992 | 1,100098868 | 1,146895835 |
| <i>Wac</i>           | -0,013220658 | 0,819733898 | 1,027931994 | 1,080937474 | 1,155462676 |
| <i>Dnaja2</i>        | 0,038795774  | 0,800268246 | 1,049799379 | 1,131022506 | 1,173388809 |
| <i>Rcbtb1</i>        | 0,018683915  | 0,766967775 | 0,93348522  | 1,202382047 | 1,249851872 |
| <i>Ndufa2</i>        | -0,007277785 | 0,670760917 | 1,498347193 | 0,962546937 | 0,996923556 |
| <i>Zbtb33</i>        | 0,037620645  | 0,96179871  | 1,035483582 | 0,954295345 | 0,838898773 |
| <i>Cd200</i>         | 0,146296722  | 1,049574621 | 1,126000545 | 1,041939121 | 0,874997871 |
| <i>Pfkfb2</i>        | 0,108392338  | 1,068379714 | 1,043530997 | 0,830318939 | 0,741275676 |
| <i>Rsu1</i>          | 0,170413964  | 1,204428623 | 0,900868521 | 1,038015253 | 0,783121372 |
| <i>Rcn2</i>          | 0,208146866  | 1,173474041 | 0,942803196 | 0,981625376 | 0,988692118 |
| <i>8430436N08Rik</i> | -0,059761218 | 1,252211829 | 0,868688162 | 0,977645436 | 0,568727618 |
| <i>Zfp619</i>        | -0,001804528 | 0,834479689 | 1,019972763 | 0,582908009 | 0,691505678 |
| <i>4930404I05Rik</i> | -0,02872643  | 1,032978614 | 0,690744295 | 0,838032707 | 0,911947201 |
| <i>Zfp187</i>        | 0,087701652  | 1,029195581 | 0,780820745 | 1,055063382 | 0,882418609 |
| <i>Sowahc</i>        | 0,25247866   | 1,22001751  | 0,655498484 | 0,910132648 | 1,032598216 |
| <i>Xlr4a</i>         | -0,000599646 | 1,070994442 | 0,448704542 | 0,868077418 | 0,691752193 |
| <i>3110040N11Rik</i> | 0,024473102  | 1,004479396 | 0,496112282 | 0,817229508 | 0,821291498 |

|                       |              |             |             |             |             |
|-----------------------|--------------|-------------|-------------|-------------|-------------|
| <i>Gpx2-ps1</i>       | -0,258243753 | 0,429114363 | 0,628585522 | 1,384554927 | 1,231129834 |
| <i>Foxe1</i>          | -0,008525905 | 0,235886646 | 0,526685003 | 1,429305146 | 1,004411329 |
| <i>Rps16</i>          | -0,102338284 | 0,526301681 | 0,658239247 | 1,797910935 | 1,157477616 |
| <i>9930111J21Rik1</i> | 0,056701482  | 0,707320832 | 0,576674049 | 1,443961648 | 1,642464499 |
| <i>1810006K21Rik</i>  | -0,060652082 | 0,784641657 | 0,408466982 | 1,437271386 | 1,226078123 |
| <i>Pdia2</i>          | 0,033902372  | 0,236606682 | 1,04002928  | 1,127291623 | 1,386964389 |
| <i>Pydc4</i>          | -0,594364347 | 0,298681314 | 0,945436015 | 0,992385504 | 1,109503915 |
| <i>Xcl1</i>           | 0,124789852  | 0,453698168 | 0,855637099 | 0,933276992 | 1,429957981 |
| <i>H60b</i>           | -0,063954304 | 0,43314789  | 0,860155092 | 0,988666684 | 1,436066881 |
| <i>Orm3</i>           | 0,035052989  | 0,348445718 | 0,705035082 | 1,05339119  | 1,369557477 |
| <i>Usp28</i>          | 0,184781656  | 0,443946143 | 0,578057496 | 1,011976869 | 1,357332604 |
| <i>Sele</i>           | 0,011611509  | 0,449427389 | 0,497374763 | 1,150626538 | 1,500920029 |
| <i>Atp5g3</i>         | 0,18881503   | 0,570449378 | 0,787389966 | 1,072878934 | 0,850382665 |
| <i>Apol9a</i>         | 0,109795924  | 0,584778112 | 0,755050699 | 1,011285553 | 0,856088303 |
| <i>2310009B15Rik</i>  | 0,258468424  | 0,46474055  | 0,766470891 | 1,139364899 | 0,830097162 |
| <i>Fcgr3</i>          | 0,027706418  | 0,437208682 | 0,593243015 | 1,213533244 | 0,872802107 |
| <i>Mrm1</i>           | 0,202839307  | 0,249141897 | 0,714629958 | 1,001888684 | 0,950015801 |
| <i>Cox7c</i>          | 0,107579843  | 0,23451043  | 0,607152384 | 1,056485024 | 0,969585103 |
| <i>Zfp655</i>         | 0,124859018  | 0,601856343 | 0,532173555 | 0,919839775 | 1,049175263 |
| <i>Nudt19</i>         | 0,127731677  | 0,553867484 | 0,565793471 | 0,815641848 | 1,046955559 |
| <i>Smchd1</i>         | 0,052132014  | 0,629821446 | 0,630228954 | 0,88769147  | 1,028358584 |
| <i>Jhdm1d</i>         | 0,033044486  | 0,556748071 | 0,530010668 | 0,995740171 | 1,098560476 |
| <i>Khyn</i>           | 0,239565888  | 0,560515896 | 0,516559378 | 1,057266805 | 0,981457731 |
| <i>Cpsf3</i>          | 0,196683265  | 0,534518893 | 0,509079935 | 1,018326398 | 0,98637204  |
| <i>Kif1b</i>          | 0,161445794  | 0,494752922 | 0,517759874 | 1,018172381 | 1,056283864 |
| <i>Mettl3</i>         | 0,209779683  | 0,621520491 | 0,698912    | 0,970375592 | 1,093781096 |
| <i>Dock2</i>          | 0,271372592  | 0,629523762 | 0,75010216  | 0,958032995 | 1,143658263 |
| <i>Trmt61a</i>        | 0,343458284  | 0,561939503 | 0,624566156 | 0,945430471 | 1,128667746 |
| <i>Eif3c</i>          | 0,182231978  | 0,528104701 | 0,664010576 | 0,928920979 | 1,034931682 |
| <i>Glud1</i>          | 0,223034657  | 0,504112324 | 0,650973856 | 0,965235337 | 1,060767403 |
| <i>Pglyrp1</i>        | 0,646289554  | 0,990729549 | 0,69491797  | 1,036193983 | 1,223112275 |
| <i>2310011J03Rik</i>  | 0,700947771  | 1,108742591 | 0,735046733 | 0,967596219 | 1,269410155 |
| <i>Polr3d</i>         | 0,558230299  | 0,979784659 | 0,830881415 | 1,073422088 | 1,229101486 |
| <i>Spry4</i>          | 0,564904133  | 1,109684365 | 0,83304539  | 1,071534999 | 1,26471801  |
| <i>Adprh</i>          | 0,511193568  | 1,152832425 | 0,845108508 | 1,074118217 | 1,468922778 |
| <i>Gm6537</i>         | 0,481656632  | 0,988357874 | 0,686054256 | 1,032155552 | 1,464626832 |
| <i>Rbm43</i>          | 0,535059336  | 0,847038753 | 0,659817863 | 1,078081242 | 1,407001343 |
| <i>Chmp1a</i>         | 0,542987759  | 0,858672914 | 0,689706285 | 1,187827552 | 1,322925761 |
| <i>1110032F04Rik</i>  | 0,565916132  | 1,067084901 | 0,555388065 | 1,160053025 | 1,314968059 |
| <i>Mrpl49</i>         | 0,671002068  | 0,930332433 | 0,769747363 | 1,184765674 | 1,310717186 |
| <i>Apobr</i>          | 0,683977308  | 0,922689067 | 0,788680453 | 1,17044013  | 1,217843898 |
| <i>Al848285</i>       | 0,785210406  | 0,931841583 | 0,627728607 | 1,164665627 | 1,331254876 |
| <i>Ccdc126</i>        | 0,688879234  | 1,062959568 | 0,844588949 | 1,294301283 | 1,085133483 |
| <i>Pla2g1b</i>        | 0,675150622  | 1,022568094 | 0,895704604 | 1,219241898 | 1,135607197 |
| <i>BC013712</i>       | 0,607611953  | 0,973249495 | 0,816323623 | 1,221946397 | 1,151281139 |
| <i>Al316807</i>       | 0,807715043  | 1,095113928 | 0,907794084 | 1,167017458 | 1,085486887 |
| <i>Gypc</i>           | 0,746806857  | 1,168029569 | 0,920952816 | 1,247588343 | 1,15643506  |
| <i>Ticam1</i>         | 0,846069122  | 1,140676325 | 0,805013375 | 1,127920791 | 1,369498469 |
| <i>Gpx3</i>           | 0,858377441  | 1,090385088 | 0,792770325 | 1,308642721 | 1,394790641 |
| <i>1700096K18Rik</i>  | 0,836895756  | 0,917132136 | 0,847726425 | 1,199625088 | 1,441912256 |
| <i>Cdc7</i>           | 0,698441261  | 0,796372814 | 0,760732726 | 1,219793969 | 0,896515729 |

|                      |             |             |             |             |             |
|----------------------|-------------|-------------|-------------|-------------|-------------|
| <i>2210039B01Rik</i> | 0,602934913 | 0,844245405 | 0,825621232 | 1,190121466 | 0,839218939 |
| <i>Adnp2</i>         | 0,643464444 | 0,85364238  | 0,811017037 | 1,072568819 | 0,976431812 |
| <i>Ppapdc1b</i>      | 0,641262771 | 0,805414139 | 0,771834248 | 1,13760454  | 1,023720844 |
| <i>Plekhg5</i>       | 0,63405869  | 0,863417203 | 0,715755867 | 1,118895154 | 0,940752449 |
| <i>Gpr180</i>        | 0,716170444 | 0,82081823  | 0,859908183 | 1,047838736 | 0,951504198 |
| <i>Tchp</i>          | 0,663308541 | 0,754171457 | 0,851663658 | 1,039869102 | 0,935485717 |
| <i>Clptm1</i>        | 0,637653047 | 0,879845245 | 0,927717988 | 1,087330099 | 0,971479629 |
| <i>H47</i>           | 0,645919253 | 0,837728064 | 0,908844177 | 1,100922887 | 0,94494375  |
| <i>Lyrn5</i>         | 0,61096372  | 0,866084039 | 0,871999689 | 1,113900217 | 0,945014734 |
| <i>Oas2</i>          | 0,535995573 | 0,718431062 | 0,739124092 | 1,305228199 | 1,036046967 |
| <i>Lats2</i>         | 0,621268576 | 0,708787335 | 0,7243103   | 1,242201403 | 1,091814625 |
| <i>Ntn5</i>          | 0,651645694 | 0,735373678 | 0,814426926 | 1,28421445  | 1,06402149  |
| <i>Comtd1</i>        | 0,682197961 | 0,819854823 | 0,831158342 | 1,313832198 | 1,073693065 |
| <i>Rab20</i>         | 0,750990657 | 0,817035358 | 0,766175913 | 1,02068289  | 1,069533869 |
| <i>Ttc21a</i>        | 0,71437543  | 0,813874412 | 0,794002909 | 0,971720579 | 1,030076434 |
| <i>Sat1</i>          | 0,723787397 | 0,834397649 | 0,676191621 | 1,022627484 | 1,140464525 |
| <i>Deaf1</i>         | 0,727195072 | 0,824740715 | 0,868768161 | 0,943417596 | 1,098024869 |
| <i>Pex11c</i>        | 0,697142571 | 0,766879413 | 0,847168754 | 0,933510143 | 1,121369297 |
| <i>Spice1</i>        | 0,807367769 | 0,772489402 | 0,823638682 | 1,005946513 | 1,163486135 |
| <i>Slc36a1</i>       | 0,650639731 | 0,69584094  | 0,830506412 | 0,938299062 | 1,029247118 |
| <i>BC031361</i>      | 0,647469676 | 0,785283576 | 0,812364171 | 0,964905029 | 1,054837651 |
| <i>Eci1</i>          | 0,742273964 | 0,686326653 | 0,759263254 | 1,039521334 | 0,951347557 |
| <i>Fads6</i>         | 0,77946781  | 0,857977359 | 0,930592006 | 1,021903366 | 0,950778292 |
| <i>Ramp3</i>         | 0,847013938 | 0,873519819 | 0,933325308 | 1,012432036 | 0,973175334 |
| <i>Zfx2</i>          | 0,822893425 | 0,772231564 | 0,922095723 | 0,930201299 | 1,013571244 |
| <i>Cnpy3</i>         | 0,767866397 | 0,793629855 | 0,888498258 | 0,941698498 | 1,032240094 |
| <i>Prc1</i>          | 0,922726345 | 0,788989063 | 0,886001599 | 1,113082041 | 0,990494502 |
| <i>Snhg4</i>         | 0,844118796 | 0,830986335 | 0,8879533   | 1,0908862   | 0,95004464  |
| <i>H2-M3</i>         | 0,447165998 | 0,619311152 | 0,964228297 | 1,173396451 | 1,635419162 |
| <i>Golm1</i>         | 0,359062588 | 0,637292439 | 0,787124851 | 1,253885111 | 1,696290601 |
| <i>Sf3b4</i>         | 0,716442399 | 0,692063493 | 0,932140849 | 1,231391952 | 1,547024433 |
| <i>Ap3m2</i>         | 0,654970509 | 0,769101041 | 0,908547971 | 1,372995444 | 1,63759153  |
| <i>Ctsa</i>          | 0,659146434 | 0,572720216 | 0,982789261 | 1,359346882 | 1,613301209 |
| <i>Rsl1d1</i>        | 0,358571164 | 0,68371362  | 1,073100995 | 1,270988869 | 1,360037727 |
| <i>Ms4a6c</i>        | 0,429737641 | 0,677573916 | 1,012104147 | 1,223166658 | 1,412434785 |
| <i>Prss50</i>        | 0,379731783 | 0,778333821 | 1,113743063 | 1,309915365 | 1,543434914 |
| <i>Ddx21</i>         | 0,343976028 | 0,704620339 | 1,084335582 | 1,233178675 | 1,542181818 |
| <i>Rae1</i>          | 0,407455912 | 0,801364837 | 0,982382298 | 1,228300864 | 1,545712599 |
| <i>Arhgef18</i>      | 0,317021114 | 0,797367821 | 0,883603468 | 1,267096123 | 1,544180434 |
| <i>2310014L17Rik</i> | 0,492794305 | 0,563117183 | 0,826589704 | 1,44253846  | 1,253742369 |
| <i>Gm9047</i>        | 0,572928879 | 0,522269973 | 0,838483766 | 1,382520395 | 1,287555334 |
| <i>Tmed4</i>         | 0,657000012 | 0,598771896 | 0,883612659 | 1,338347985 | 1,376427801 |
| <i>Fam65c</i>        | 0,481715416 | 0,500082574 | 0,822947006 | 1,269006839 | 1,289480432 |
| <i>Nip7</i>          | 0,392308103 | 0,494686925 | 0,761764788 | 1,150656518 | 1,345274405 |
| <i>Otop3</i>         | 0,378284759 | 0,695872282 | 0,707706903 | 1,284116834 | 1,214447231 |
| <i>Madd</i>          | 0,227321228 | 0,541604998 | 0,743273886 | 1,164380857 | 1,297622066 |
| <i>Lrrc61</i>        | 0,281555314 | 0,450206016 | 0,769545361 | 1,073849613 | 1,233540966 |
| <i>Polr2j</i>        | 0,629295217 | 0,591466965 | 0,746594895 | 1,044078978 | 1,452530979 |
| <i>BC031181</i>      | 0,585845474 | 0,680238251 | 0,758162783 | 1,148075893 | 1,360120635 |
| <i>Tmem177</i>       | 0,4209987   | 0,528841996 | 0,680140713 | 1,04317715  | 1,463987499 |
| <i>Hsh2d</i>         | 0,493743769 | 0,642237376 | 0,842902108 | 1,158067342 | 1,285742695 |

|                      |             |             |             |             |             |
|----------------------|-------------|-------------|-------------|-------------|-------------|
| <i>Vasn</i>          | 0,446837993 | 0,675211685 | 0,846692517 | 1,069202399 | 1,263167967 |
| <i>Pa2g4</i>         | 0,526284651 | 0,577000117 | 0,885853602 | 1,026522028 | 1,365801649 |
| <i>Bola3</i>         | 0,422182089 | 0,705553052 | 0,880353819 | 1,042706267 | 1,440474943 |
| <i>E130102H24Rik</i> | 0,473719175 | 0,792344803 | 0,806099253 | 1,013276192 | 1,42330004  |
| <i>Exosc5</i>        | 0,631598201 | 0,601957104 | 0,997366646 | 0,913634284 | 1,357848187 |
| <i>Eif6</i>          | 0,576311729 | 0,616732166 | 0,976314547 | 0,89309183  | 1,379060449 |
| <i>Ap3d1</i>         | 0,564578202 | 0,673265242 | 1,015004031 | 0,915117759 | 1,29106943  |
| <i>Sharpin</i>       | 0,636997946 | 0,528629279 | 1,064238179 | 0,976827818 | 1,386503945 |
| <i>Sc4mol</i>        | 0,425068392 | 0,478353634 | 1,003699872 | 0,766297349 | 1,264464005 |
| <i>Mir17hg</i>       | 0,541231734 | 0,487153132 | 1,004493795 | 0,891174139 | 1,227143078 |
| <i>Vars</i>          | 0,625991046 | 0,755892367 | 0,980151544 | 0,758629683 | 1,470535798 |
| <i>Tomm5</i>         | 0,573626513 | 0,695852053 | 0,988628238 | 0,75381768  | 1,38628823  |
| <i>Syf2</i>          | 0,513106032 | 0,767703515 | 1,052766365 | 0,905099185 | 1,443475081 |
| <i>Med30</i>         | 0,601050191 | 0,78471081  | 1,096624754 | 0,879599374 | 1,403790695 |
| <i>Twistnb</i>       | 0,495217929 | 0,709905693 | 1,063525341 | 0,80751406  | 1,281135951 |
| <i>Gm11696</i>       | 0,58375715  | 0,785438538 | 1,123986914 | 0,737924015 | 1,293728134 |
| <i>Hras1</i>         | 0,632377503 | 0,553916925 | 1,105516481 | 0,753127383 | 1,417484666 |
| <i>Fkbp4</i>         | 0,66660608  | 0,686655783 | 1,105133944 | 0,740412232 | 1,490805381 |
| <i>2810422J05Rik</i> | 0,738537443 | 0,586843494 | 0,870717285 | 0,570879055 | 1,327909528 |
| <i>Zfp296</i>        | 0,816203568 | 0,674047962 | 0,940010127 | 0,568682937 | 1,324194359 |
| <i>Rxra</i>          | 0,701657811 | 0,553412396 | 0,96221438  | 0,555599483 | 1,174034095 |
| <i>Rrp12</i>         | 0,843152935 | 0,629550293 | 1,160407605 | 0,554677973 | 1,376984599 |
| <i>Stac2</i>         | 0,770427669 | 0,576904607 | 1,178900539 | 0,73325027  | 1,289491589 |
| <i>Arsa</i>          | 0,732580302 | 0,878343269 | 1,071800077 | 0,536207476 | 1,257581685 |
| <i>Tnfsf10</i>       | 0,795868295 | 0,80032409  | 1,093460547 | 0,627119757 | 1,259586837 |
| <i>Ap2a1</i>         | 0,697338063 | 0,737870186 | 1,092464308 | 0,645293735 | 1,241947908 |
| <i>Slc25a44</i>      | 0,661080973 | 0,774056447 | 1,116672273 | 0,641936468 | 1,328442517 |
| <i>Spock2</i>        | 0,714529693 | 0,65723224  | 1,063498211 | 0,583668059 | 1,077753699 |
| <i>Kdm1b</i>         | 0,717679827 | 0,712946519 | 1,122548251 | 0,660597705 | 1,069441287 |
| <i>Pou5f1</i>        | 0,774654834 | 0,676222997 | 1,185794469 | 0,606590751 | 1,197272236 |
| <i>D330012F22Rik</i> | 0,746079716 | 0,807812574 | 1,209112748 | 1,098976274 | 1,341541243 |
| <i>Rusc1</i>         | 0,733491281 | 0,73899435  | 1,16621227  | 1,13465615  | 1,356483753 |
| <i>Pam16</i>         | 0,665184273 | 0,826016928 | 1,149777103 | 0,991032046 | 1,402376359 |
| <i>Tmem222</i>       | 0,727759661 | 0,800327194 | 1,159522109 | 1,023102396 | 1,389385225 |
| <i>Slc26a11</i>      | 0,702009951 | 0,729884882 | 1,040263468 | 0,941857737 | 1,284377522 |
| <i>Med20</i>         | 0,686081947 | 0,800915672 | 1,078436943 | 0,961942053 | 1,298794256 |
| <i>Slc6a6</i>        | 0,753306901 | 0,822235965 | 1,128333842 | 0,909487157 | 1,266006206 |
| <i>Vps37d</i>        | 0,817825651 | 0,780327763 | 1,132664096 | 0,936738018 | 1,255456333 |
| <i>6430531B16Rik</i> | 0,790469785 | 0,643716641 | 1,012260228 | 1,078590859 | 1,419609862 |
| <i>Llgl1</i>         | 0,864215385 | 0,624654385 | 1,019988167 | 1,024424539 | 1,374412667 |
| <i>Ndufb9</i>        | 0,804012805 | 0,658746229 | 0,992988571 | 1,158833263 | 1,294689719 |
| <i>Polr2f</i>        | 0,73409806  | 0,752004421 | 1,077651429 | 1,112751777 | 1,376351655 |
| <i>Dpm2</i>          | 0,725913863 | 0,680324292 | 1,036439423 | 1,15808659  | 1,451320959 |
| <i>Mri1</i>          | 0,802441991 | 0,798052854 | 0,923006905 | 1,017331502 | 1,385934689 |
| <i>Fcer1g</i>        | 0,851125753 | 0,717357204 | 0,920208626 | 1,093799133 | 1,454968287 |
| <i>Cln5</i>          | 0,56795394  | 0,667379393 | 0,974282483 | 1,061404274 | 1,311744133 |
| <i>Ctu1</i>          | 0,601532157 | 0,638263257 | 0,926509161 | 1,11778326  | 1,291874847 |
| <i>Amz1</i>          | 0,689601892 | 0,650390107 | 1,019615946 | 1,080360405 | 1,240494965 |
| <i>Glo1</i>          | 0,685826263 | 0,765768843 | 1,001401117 | 1,033063352 | 1,375292622 |
| <i>Rfxank</i>        | 0,61829759  | 0,695946524 | 0,91205504  | 1,057719525 | 1,4009434   |
| <i>Cct8</i>          | 0,555705209 | 0,768362921 | 1,086146429 | 1,098122239 | 1,359892024 |

|                      |             |             |             |             |             |
|----------------------|-------------|-------------|-------------|-------------|-------------|
| <i>Fkbp8</i>         | 0,543530627 | 0,816084705 | 1,048769351 | 1,123711154 | 1,364820457 |
| <i>Ncl</i>           | 0,612822029 | 0,822187299 | 1,057753854 | 1,126066115 | 1,351293101 |
| <i>Map2k2</i>        | 0,59433487  | 0,74239754  | 1,127465455 | 1,078751323 | 1,315243292 |
| <i>Pknox1</i>        | 0,659493452 | 0,858326162 | 0,920272433 | 0,968317762 | 1,234609029 |
| <i>Pcnxl3</i>        | 0,654305119 | 0,879557328 | 0,877223603 | 0,907666249 | 1,188667864 |
| <i>Capns1</i>        | 0,630000426 | 0,883317618 | 0,936633649 | 0,861067457 | 1,299468266 |
| <i>Chtf8</i>         | 0,720364652 | 0,907407555 | 0,832645555 | 0,946319356 | 1,328805007 |
| <i>Z700038G22Rik</i> | 0,752021572 | 0,95087654  | 0,885355001 | 0,902153712 | 1,324206236 |
| <i>Tmbim4</i>        | 0,714804228 | 0,845105866 | 0,916015077 | 1,068467191 | 1,289639022 |
| <i>Tanc1</i>         | 0,735808932 | 0,825655426 | 0,863086989 | 0,992670681 | 1,239957011 |
| <i>Hcfc1r1</i>       | 0,653561451 | 0,974432418 | 0,821101448 | 1,062660536 | 1,424409322 |
| <i>Atp6v1f</i>       | 0,614392011 | 0,79774866  | 0,853314089 | 1,025689389 | 1,486762368 |
| <i>Polr3g</i>        | 0,755313531 | 0,752473971 | 1,032357245 | 0,929820004 | 1,161713162 |
| <i>Muc1</i>          | 0,721858421 | 0,66765299  | 1,004069935 | 0,970643409 | 1,133666675 |
| <i>Pink1</i>         | 0,694509401 | 0,706060863 | 0,945351342 | 0,954152163 | 1,214262284 |
| <i>Surf4</i>         | 0,795465782 | 0,785493882 | 0,988590559 | 0,990138822 | 1,144536767 |
| <i>Atad1</i>         | 0,810802459 | 0,786914849 | 0,951473536 | 0,918713321 | 1,109526858 |
| <i>Sema4g</i>        | 0,786161742 | 0,80961601  | 1,036387926 | 0,761480143 | 1,068866894 |
| <i>Acox1</i>         | 0,828485116 | 0,778459272 | 0,980779829 | 0,812984599 | 1,064090729 |
| <i>Fbxl19</i>        | 0,821218372 | 0,693706466 | 1,043508326 | 0,826058185 | 1,16022203  |
| <i>Slc25a33</i>      | 0,880042535 | 0,934459266 | 1,054015881 | 0,95212311  | 1,308875355 |
| <i>Pigl</i>          | 0,942154197 | 0,938453045 | 1,115410089 | 0,954158719 | 1,28187812  |
| <i>Zfp64</i>         | 0,85734422  | 0,940349227 | 1,076131972 | 0,943317969 | 1,200757639 |
| <i>Aqp3</i>          | 0,829132165 | 0,90377868  | 1,116167106 | 0,930472053 | 1,250236867 |
| <i>Foxd2</i>         | 0,929298521 | 0,845045433 | 1,071011199 | 0,88051167  | 1,266997103 |
| <i>Rhoq</i>          | 0,90025386  | 0,921734972 | 1,12050862  | 0,824964182 | 1,261246629 |
| <i>Scnn1a</i>        | 0,842920733 | 0,91226065  | 0,983535411 | 0,874911091 | 1,187562762 |
| <i>Mark4</i>         | 0,830280177 | 0,901425779 | 0,986882603 | 0,907558998 | 1,211929839 |
| <i>Sh3glb2</i>       | 0,897420122 | 0,815710636 | 0,929970658 | 0,944409721 | 1,216210421 |
| <i>Ttc9c</i>         | 0,756132227 | 0,939602087 | 1,078581776 | 0,841884133 | 1,244871822 |
| <i>Coro6</i>         | 0,82660462  | 0,90268818  | 1,034602292 | 0,847054066 | 1,339224544 |
| <i>Acss1</i>         | 0,835259682 | 0,791985748 | 1,062972766 | 0,746608517 | 1,307872292 |
| <i>Atp6v0b</i>       | 0,496059464 | 0,375856885 | 0,907310409 | 0,931596607 | 1,002957816 |
| <i>Zdhhc7</i>        | 0,495044663 | 0,434117383 | 0,856943278 | 0,960956647 | 1,051708735 |
| <i>Lin7c</i>         | 0,479837937 | 0,40849542  | 0,816619679 | 1,005320726 | 1,13666767  |
| <i>O610031J06Rik</i> | 0,638394942 | 0,479511071 | 1,021608734 | 1,051727018 | 1,120660151 |
| <i>Hsp90aa1</i>      | 0,65742136  | 0,428988054 | 0,931746787 | 0,928882304 | 1,073614361 |
| <i>Mgat2</i>         | 0,730529347 | 0,466344368 | 0,898080852 | 1,19724045  | 1,161548119 |
| <i>Med25</i>         | 0,828502516 | 0,517033817 | 0,841517617 | 0,98298516  | 1,195336458 |
| <i>Snhg3</i>         | 0,67645398  | 0,304560826 | 1,113937941 | 0,955027961 | 1,3804312   |
| <i>Smcr7</i>         | 0,850993063 | 0,418478734 | 0,868884365 | 0,989891643 | 1,462954449 |
| <i>A330009N23Rik</i> | 0,676967177 | 0,279273959 | 0,752605218 | 0,948187355 | 1,450266869 |
| <i>Tmem160</i>       | 0,587421672 | 0,36065845  | 0,88189367  | 0,774362531 | 1,486890621 |
| <i>Cyhr1</i>         | 0,460500964 | 0,480773693 | 0,391565279 | 1,389739312 | 1,239361164 |
| <i>Mterf</i>         | 0,617755535 | 0,370741132 | 0,263326195 | 1,135383181 | 1,594894738 |
| <i>Drd4</i>          | 0,625269524 | 0,725200612 | 0,526679988 | 0,866351695 | 1,46001192  |
| <i>Yipf2</i>         | 0,515729659 | 0,868517945 | 0,557624496 | 0,910344401 | 1,400500425 |
| <i>Uba52</i>         | 0,856656198 | 0,818252287 | 0,512700806 | 1,004571955 | 1,37162105  |
| <i>Ccdc74a</i>       | 0,753677101 | 0,710424315 | 0,542697306 | 0,964030344 | 1,160992277 |
| <i>Pde2a</i>         | 0,895155811 | 0,586605769 | 0,562609234 | 0,910450383 | 1,22153909  |
| <i>Uqcr11</i>        | 0,778153036 | 0,524116549 | 0,508851381 | 0,836045837 | 1,105464409 |

|                       |             |             |             |             |             |
|-----------------------|-------------|-------------|-------------|-------------|-------------|
| <i>Foxc2</i>          | 0,718515981 | 0,535836671 | 0,523316836 | 0,802179225 | 1,168472887 |
| <i>A630076J17Rik</i>  | 0,780692638 | 0,339839018 | 0,608438552 | 0,931022936 | 1,246744868 |
| <i>Phyhd1</i>         | 0,592593779 | 0,355365007 | 0,551360153 | 1,038106941 | 1,165366669 |
| <i>Tstd1</i>          | 0,772232952 | 0,385946249 | 0,287259244 | 1,080667879 | 1,02079816  |
| <i>Wfikkn2</i>        | 0,49284606  | 0,704148575 | 0,197513701 | 0,868441414 | 1,035306205 |
| <i>Zfp764</i>         | 0,486307064 | 0,706525665 | 0,411459253 | 0,98609623  | 1,230035783 |
| <i>Selm</i>           | 0,710820642 | 0,888371833 | 0,352068905 | 0,913078923 | 1,117129808 |
| <i>1700047I17Rik2</i> | 0,732771234 | 1,005439322 | 0,012908504 | 0,976386503 | 1,121370949 |
| <i>Fam177a</i>        | 0,732771234 | 1,005439322 | 0,012908504 | 0,976386503 | 1,121370949 |
| <i>Pfdn5</i>          | 0,397772427 | 1,120823321 | 1,16257336  | 0,916125535 | 1,288034459 |
| <i>Hdac2</i>          | 0,371749627 | 1,088284151 | 1,282244784 | 1,003772023 | 1,320405753 |
| <i>Vps26b</i>         | 0,380500621 | 0,891657449 | 1,109541353 | 0,919188241 | 1,33567759  |
| <i>Prkrir</i>         | 0,381320207 | 0,906920579 | 1,081529674 | 0,915146671 | 1,32415628  |
| <i>Ric8b</i>          | 0,38007846  | 0,937205336 | 1,122831289 | 0,838403245 | 1,289841049 |
| <i>Tbc1d20</i>        | 0,399640538 | 0,874752685 | 1,169114109 | 0,965076098 | 1,330420453 |
| <i>Ilkap</i>          | 0,508068346 | 1,014871288 | 1,252844527 | 1,069488747 | 1,355607068 |
| <i>Ivns1abp</i>       | 0,565960918 | 1,031599726 | 1,234103586 | 1,064468243 | 1,36760534  |
| <i>Rasa2</i>          | 0,468386649 | 1,019941673 | 1,204823337 | 1,096630834 | 1,338267612 |
| <i>Arhgap4</i>        | 0,571035849 | 0,945792092 | 1,271350125 | 1,03352612  | 1,26654883  |
| <i>Mms19</i>          | 0,559528759 | 1,011685927 | 1,324593543 | 1,004694654 | 1,316361729 |
| <i>Nedd4</i>          | 0,48160699  | 0,953573955 | 1,237386113 | 0,924276392 | 1,374315383 |
| <i>Isg20I2</i>        | 0,466415647 | 1,02204472  | 1,260893138 | 0,970215528 | 1,327893304 |
| <i>Gpr97</i>          | 0,487280813 | 0,943917332 | 1,206091695 | 0,929351657 | 1,272353747 |
| <i>Ffar2</i>          | 0,481760084 | 0,978271433 | 1,16620236  | 0,942126075 | 1,251599573 |
| <i>Golt1b</i>         | 0,546150708 | 0,989374414 | 1,184285985 | 0,972523432 | 1,286289743 |
| <i>Zfp664</i>         | 0,4921801   | 0,969337514 | 1,160172186 | 0,859414962 | 1,077227627 |
| <i>Klhl11</i>         | 0,478312336 | 1,091316878 | 1,297096686 | 0,900684866 | 1,164801711 |
| <i>Rab2a</i>          | 0,236341997 | 1,003838082 | 1,113216822 | 0,984705036 | 1,350361847 |
| <i>Gpbp1I1</i>        | 0,30894805  | 1,021686205 | 1,103490151 | 1,003436853 | 1,390851995 |
| <i>Vcpip1</i>         | 0,245633871 | 1,003346971 | 1,043362881 | 0,971051768 | 1,441091913 |
| <i>Usmg5</i>          | 0,269735502 | 1,041574464 | 0,953806787 | 0,877502147 | 1,310826868 |
| <i>Arhgap1</i>        | 0,431114675 | 0,994354909 | 0,952390248 | 1,0129516   | 1,28663232  |
| <i>Ncbp2</i>          | 0,372420633 | 0,945171059 | 0,912667242 | 0,971087415 | 1,255994922 |
| <i>Nt5e</i>           | 0,335434678 | 0,995990983 | 0,954165518 | 0,954811554 | 1,361044978 |
| <i>Zfp809</i>         | 0,417994013 | 0,957975586 | 0,973718787 | 0,93412629  | 1,390616643 |
| <i>Tra2a</i>          | 0,208450867 | 0,917731857 | 1,193214017 | 1,163183646 | 1,372560958 |
| <i>Hspa4</i>          | 0,212619996 | 0,963814276 | 1,179004485 | 1,199300131 | 1,367529867 |
| <i>Csde1</i>          | 0,142935957 | 0,97387922  | 1,257689985 | 1,166155651 | 1,443954733 |
| <i>Caprin1</i>        | 0,140178561 | 1,027117597 | 1,242637286 | 1,254687613 | 1,330546578 |
| <i>Csnk2a1</i>        | 0,187834918 | 0,917658128 | 1,157071064 | 1,126828936 | 1,272354258 |
| <i>Qrich1</i>         | 0,200444183 | 0,910753803 | 1,104355434 | 1,116934183 | 1,293847664 |
| <i>Mob4</i>           | 0,248649725 | 0,965810172 | 1,152813678 | 1,140798999 | 1,265767739 |
| <i>Tnik</i>           | 0,175558344 | 0,986189792 | 1,188341461 | 1,081332816 | 1,274377029 |
| <i>Fem1b</i>          | 0,138191415 | 0,964828247 | 1,216781558 | 1,079185387 | 1,24246955  |
| <i>Clk4</i>           | 0,221080037 | 0,966616533 | 1,296669161 | 1,027474054 | 1,347063552 |
| <i>Gar1</i>           | 0,129463083 | 0,99145929  | 1,29690537  | 1,021199823 | 1,353391837 |
| <i>Ing2</i>           | 0,239168717 | 0,950927674 | 1,382480643 | 1,023367474 | 1,293494312 |
| <i>Lman1I</i>         | 0,247999513 | 0,808930258 | 1,424404431 | 1,033056934 | 1,486585203 |
| <i>Jmjd7</i>          | 0,114627095 | 0,774356427 | 1,334472779 | 1,01555118  | 1,395477724 |
| <i>Wdr43</i>          | 0,210839809 | 0,855265795 | 1,178456792 | 1,143580962 | 1,496506763 |
| <i>Calr</i>           | 0,244658389 | 0,790942852 | 1,225018531 | 1,182218607 | 1,494334252 |

|                      |             |             |             |             |             |
|----------------------|-------------|-------------|-------------|-------------|-------------|
| <i>Pde3b</i>         | 0,164898609 | 0,800969178 | 1,223094448 | 1,109508258 | 1,550299978 |
| <i>C030034I22Rik</i> | 0,179006849 | 0,807337803 | 1,2221903   | 1,054266229 | 1,591447456 |
| <i>Tssk2</i>         | 0,306898149 | 0,96406597  | 1,055089697 | 1,146567252 | 1,38256908  |
| <i>Parp9</i>         | 0,328042965 | 0,877230804 | 1,095563273 | 1,138498944 | 1,469123138 |
| <i>Rbm7</i>          | 0,189637439 | 0,945265743 | 1,075989263 | 1,139167248 | 1,487536994 |
| <i>Uhmk1</i>         | 0,315514978 | 0,988932573 | 1,234317296 | 1,117537649 | 1,458576148 |
| <i>Chchd2</i>        | 0,278948066 | 0,990044147 | 1,251547413 | 1,05787229  | 1,46085425  |
| <i>Rnf146</i>        | 0,305398492 | 1,01311674  | 1,208676174 | 1,099553457 | 1,412062554 |
| <i>Ybx1</i>          | 0,287766592 | 1,027173292 | 1,228760123 | 1,074432917 | 1,371595349 |
| <i>Atp5j</i>         | 0,295149465 | 0,996966956 | 1,160077814 | 1,094277824 | 1,560798699 |
| <i>Smek1</i>         | 0,272254828 | 1,0145934   | 1,225551398 | 1,126363731 | 1,520583203 |
| <i>Hsp90b1</i>       | 0,291273501 | 0,998351591 | 1,190173969 | 1,057960734 | 1,642018185 |
| <i>Mrpl33</i>        | 0,174185474 | 1,120657423 | 1,22856114  | 1,105336296 | 1,570355724 |
| <i>Rnps1</i>         | 0,096952009 | 0,945845168 | 1,199614296 | 1,01070042  | 1,551059719 |
| <i>Dleu2</i>         | 0,604069012 | 0,913551488 | 1,213157339 | 1,126299275 | 1,298835063 |
| <i>E530011L22Rik</i> | 0,611634178 | 0,973280771 | 1,175194343 | 1,151207338 | 1,277131484 |
| <i>Cs</i>            | 0,592604101 | 0,990247044 | 1,25251496  | 1,160573952 | 1,296788361 |
| <i>Z610301G19Rik</i> | 0,691683487 | 0,932658901 | 1,332456336 | 1,145124986 | 1,250735431 |
| <i>Zmym1</i>         | 0,609674074 | 1,066366563 | 1,318745643 | 1,086390442 | 1,217066947 |
| <i>Ddx17</i>         | 0,650883059 | 1,121457097 | 1,286944163 | 1,145092243 | 1,290627221 |
| <i>Nfe2l1</i>        | 0,571111855 | 1,079957477 | 1,404648321 | 1,067744096 | 1,294427662 |
| <i>Tdp2</i>          | 0,486500408 | 0,875271575 | 1,246442142 | 1,206267846 | 1,471027427 |
| <i>Wbscr16</i>       | 0,481768199 | 0,991451805 | 1,316417874 | 1,181232813 | 1,496502412 |
| <i>Dnajc14</i>       | 0,443380302 | 0,908362919 | 1,278573854 | 1,200378344 | 1,304817385 |
| <i>O610007L01Rik</i> | 0,425544405 | 0,926518412 | 1,199928229 | 1,241553393 | 1,391533455 |
| <i>Znfx1</i>         | 0,536565849 | 1,135289542 | 1,086776044 | 1,19243831  | 1,484296432 |
| <i>Ube2q1</i>        | 0,549903541 | 1,116303679 | 1,094796264 | 1,224200881 | 1,567170286 |
| <i>Rps19bp1</i>      | 0,497039124 | 1,139901749 | 1,094509669 | 1,007148681 | 1,506296625 |
| <i>Wdyh1</i>         | 0,486353344 | 0,998584551 | 1,146503908 | 1,100591937 | 1,563592125 |
| <i>Reep5</i>         | 0,469885213 | 0,998560752 | 1,198200814 | 1,125743759 | 1,499716355 |
| <i>Anapc7</i>        | 0,526217078 | 0,97668275  | 1,179821977 | 1,037967564 | 1,492054852 |
| <i>Eml4</i>          | 0,588526862 | 1,044134181 | 1,179529644 | 1,15762413  | 1,452715348 |
| <i>Kif5b</i>         | 0,500661411 | 1,071613172 | 1,205335542 | 1,165751865 | 1,422453347 |
| <i>Srsf12</i>        | 0,56575165  | 1,047772692 | 1,314680391 | 1,115231889 | 1,526040124 |
| <i>Cyth3</i>         | 0,59943356  | 0,983762621 | 1,285662104 | 1,091248473 | 1,536946246 |
| <i>4930581F22Rik</i> | 0,597517871 | 1,105099492 | 1,189367293 | 1,118243265 | 1,576995781 |
| <i>Eif4a3</i>        | 0,3928994   | 0,98175188  | 1,096755601 | 1,111370709 | 1,380249744 |
| <i>Ahnak</i>         | 0,398280901 | 0,898720519 | 1,140269712 | 1,094570535 | 1,415064354 |
| <i>Tmod3</i>         | 0,474514635 | 0,933215187 | 1,125813731 | 1,136665104 | 1,464201089 |
| <i>Zswim6</i>        | 0,379834937 | 0,964471579 | 1,145575974 | 1,178420251 | 1,502200007 |
| <i>Pds5a</i>         | 0,415170348 | 0,998398522 | 1,164913981 | 1,174642573 | 1,465881156 |
| <i>Pcf11</i>         | 0,349017444 | 0,99598863  | 1,110829323 | 1,237517866 | 1,483607871 |
| <i>Srpr</i>          | 0,497392812 | 0,86151184  | 1,019708148 | 1,138623564 | 1,54226625  |
| <i>Rpl35a</i>        | 0,427503829 | 0,941937264 | 1,068428367 | 1,079528752 | 1,601400296 |
| <i>Ttc3</i>          | 0,312851564 | 1,196697517 | 1,346127372 | 1,183652174 | 1,241178484 |
| <i>Ube2b</i>         | 0,303804841 | 1,158218791 | 1,268125228 | 1,195943202 | 1,226041842 |
| <i>Kdm5b</i>         | 0,401463331 | 1,213815203 | 1,288594382 | 1,196220887 | 1,17105267  |
| <i>Cdc40</i>         | 0,385306259 | 1,247146051 | 1,250442693 | 1,183386676 | 1,21143953  |
| <i>Stap1</i>         | 0,415498304 | 1,183282658 | 1,26384641  | 1,062445529 | 1,193879974 |
| <i>Ranbp6</i>        | 0,4628357   | 1,253332868 | 1,243194339 | 1,068409804 | 1,25533178  |
| <i>Tmem70</i>        | 0,389645281 | 1,310951554 | 1,413166309 | 1,209371754 | 1,376924492 |

|                      |              |             |             |             |             |
|----------------------|--------------|-------------|-------------|-------------|-------------|
| <i>Sgk3</i>          | 0,472973772  | 1,226073551 | 1,363013988 | 1,18149102  | 1,329896769 |
| <i>Gramd1b</i>       | 0,304651633  | 1,265787204 | 1,278424333 | 1,137073395 | 1,42610863  |
| <i>4933426M11Rik</i> | 0,289279044  | 1,244633909 | 1,26058862  | 1,218437492 | 1,368328085 |
| <i>Capza2</i>        | 0,350936872  | 1,128218874 | 1,376205603 | 1,148657575 | 1,409258089 |
| <i>Zfp53</i>         | 0,451437141  | 1,069128379 | 1,398114539 | 1,099182758 | 1,482639379 |
| <i>Plekho2</i>       | 0,4499592    | 1,100024397 | 1,424987332 | 0,959568733 | 1,417080527 |
| <i>Ifit1</i>         | -0,315524156 | 1,047837612 | 1,263763268 | 1,320349372 | 1,347671465 |
| <i>Tank</i>          | -0,025645465 | 1,106476758 | 1,228494912 | 1,271078947 | 1,311418246 |
| <i>Cnot6l</i>        | 0,00925747   | 1,174156215 | 1,264562922 | 1,38562513  | 1,386524083 |
| <i>Nup153</i>        | 0,07309876   | 1,07871473  | 1,092156977 | 1,432552148 | 1,368593301 |
| <i>Rod1</i>          | 0,164664669  | 1,13710007  | 1,221562554 | 1,293660637 | 1,369563351 |
| <i>Pum2</i>          | 0,22940816   | 1,16695383  | 1,273221076 | 1,30952692  | 1,396442494 |
| <i>Msn</i>           | 0,137661723  | 1,191969532 | 1,242685036 | 1,218052122 | 1,345343697 |
| <i>Pon2</i>          | 0,236912184  | 1,138942885 | 1,170807501 | 1,241587263 | 1,225522497 |
| <i>Tm9sf3</i>        | 0,275120476  | 1,13319804  | 1,13955289  | 1,249496633 | 1,359081325 |
| <i>Arcn1</i>         | 0,120178762  | 1,005829638 | 1,287386366 | 1,229191839 | 1,589831504 |
| <i>Dmtf1</i>         | 0,086363106  | 0,972815573 | 1,256941044 | 1,262235699 | 1,54392355  |
| <i>2500003M10Rik</i> | 0,05553287   | 0,998362895 | 1,191990893 | 1,229661722 | 1,517191645 |
| <i>Atrip</i>         | 0,232189401  | 0,944233316 | 1,249017957 | 1,223629116 | 1,59425838  |
| <i>Ipcef1</i>        | 0,161802088  | 0,994900715 | 1,196537123 | 1,233888477 | 1,645729625 |
| <i>Zc3h15</i>        | 0,046292229  | 1,005287522 | 1,395746598 | 1,14707429  | 1,520716148 |
| <i>Zfp622</i>        | 0,073924165  | 1,017431611 | 1,330030526 | 1,164111639 | 1,457764083 |
| <i>Samd9l</i>        | 0,045091833  | 1,059698463 | 1,410986769 | 1,30478714  | 1,558948288 |
| <i>Tmem9b</i>        | 0,154197577  | 0,979200671 | 0,963154866 | 1,254354355 | 1,457013247 |
| <i>Filip1l</i>       | 0,12289361   | 1,084495453 | 1,057382427 | 1,190338091 | 1,404478453 |
| <i>Dguok</i>         | 0,330141784  | 0,968508505 | 0,968033161 | 1,290706923 | 1,416833901 |
| <i>Metap1</i>        | 0,298692242  | 0,973649259 | 1,014013747 | 1,280518274 | 1,328774546 |
| <i>Nras</i>          | 0,182675812  | 1,108060269 | 1,055838292 | 1,318184286 | 1,386812188 |
| <i>C030019I05Rik</i> | 0,28247046   | 1,127777256 | 1,046445678 | 1,371219314 | 1,354654122 |
| <i>Tmf1</i>          | 0,206510582  | 1,193979865 | 1,081293197 | 1,310232483 | 1,499009826 |
| <i>Kpna4</i>         | 0,233491512  | 1,036926384 | 1,182564551 | 1,252744125 | 1,462797982 |
| <i>Cpsf6</i>         | 0,279953105  | 0,987646365 | 1,174680711 | 1,272977398 | 1,441473752 |
| <i>Arhgap39</i>      | 0,281786693  | 1,062215138 | 1,1608172   | 1,392567113 | 1,43841432  |
| <i>Rnf4</i>          | 0,337691113  | 0,904231153 | 1,4134268   | 1,175650387 | 1,533977986 |
| <i>Zcchc13</i>       | 0,327003195  | 1,022656323 | 1,452227209 | 1,133136732 | 1,476891195 |
| <i>2900097C17Rik</i> | 0,337029657  | 1,004945528 | 1,428990875 | 1,241855056 | 1,387774806 |
| <i>Mitd1</i>         | 0,422005303  | 0,92994701  | 1,436240824 | 1,2444285   | 1,455667996 |
| <i>Vapa</i>          | 0,362717222  | 1,014647988 | 1,351015005 | 1,251252467 | 1,638282271 |
| <i>Trafd1</i>        | 0,379366479  | 1,06051132  | 1,487510128 | 1,294713048 | 1,616932519 |
| <i>Matr3</i>         | 0,278678493  | 1,07015409  | 1,448228893 | 1,44379734  | 1,626087164 |
| <i>Map3k3</i>        | 0,278138955  | 1,115039986 | 1,406232205 | 1,486814598 | 1,581777879 |
| <i>5430416N02Rik</i> | 0,315277504  | 1,046890313 | 1,405510173 | 1,417790937 | 1,524345028 |
| <i>Zfp207</i>        | 0,425823918  | 1,036967346 | 1,410852429 | 1,474383954 | 1,589289092 |
| <i>Hnrnpm</i>        | 0,331357386  | 1,120492806 | 1,447201892 | 1,344526818 | 1,432724268 |
| <i>Kpnb1</i>         | 0,332990486  | 1,110370717 | 1,357817691 | 1,395830433 | 1,427850624 |
| <i>Dcaf12</i>        | 0,515212576  | 1,216531417 | 1,24575522  | 1,316976869 | 1,475658034 |
| <i>Usp25</i>         | 0,419582376  | 1,177978335 | 1,257300877 | 1,270065344 | 1,519882315 |
| <i>Csnk1g3</i>       | 0,423634495  | 1,278521769 | 1,249575273 | 1,379082033 | 1,491530434 |
| <i>Picalm</i>        | 0,341972363  | 1,218020773 | 1,385025882 | 1,293334204 | 1,489077765 |
| <i>Papola</i>        | 0,367921017  | 1,229997737 | 1,38380112  | 1,330576887 | 1,50561757  |
| <i>Gbbp1</i>         | 0,407104567  | 1,222579156 | 1,421279747 | 1,249178916 | 1,44889484  |



|                       |              |             |             |             |             |
|-----------------------|--------------|-------------|-------------|-------------|-------------|
| <i>Arpc1a</i>         | 0,416276107  | 1,258700252 | 1,350880064 | 1,335864662 | 1,469845267 |
| <i>Rap1gds1</i>       | 0,456380355  | 1,228459278 | 1,374087346 | 1,333717161 | 1,491828664 |
| <i>Abi1</i>           | 0,467522069  | 1,258233887 | 1,334653244 | 1,286030378 | 1,483341658 |
| <i>Zzz3</i>           | 0,429249592  | 1,200999159 | 1,357503456 | 1,291811256 | 1,550939545 |
| <i>Tmem30a</i>        | 0,376184562  | 1,015827339 | 1,239884481 | 1,284842149 | 1,512492789 |
| <i>Lnpep</i>          | 0,343788865  | 1,056470657 | 1,267590875 | 1,274633717 | 1,53051991  |
| <i>Eif3h</i>          | 0,328276509  | 1,119127549 | 1,278618809 | 1,224621432 | 1,491788672 |
| <i>Snrnp70</i>        | 0,298886525  | 1,098765961 | 1,284342716 | 1,238694355 | 1,514157824 |
| <i>Ppp1r12a</i>       | 0,404212045  | 1,100859496 | 1,244210725 | 1,261331279 | 1,496109682 |
| <i>Ngdn</i>           | 0,374989439  | 1,068928938 | 1,255227316 | 1,247769032 | 1,436717487 |
| <i>Zfp866</i>         | 0,38994758   | 1,118631072 | 1,300613249 | 1,289344052 | 1,447759285 |
| <i>Rbm5</i>           | 0,398640031  | 1,125961852 | 1,208788976 | 1,212351745 | 1,458652022 |
| <i>Prkacb</i>         | 0,435089803  | 1,099554834 | 1,258214748 | 1,185052554 | 1,476261753 |
| <i>Paip2</i>          | 0,265571222  | 1,312687489 | 1,352950022 | 1,366182581 | 1,483896638 |
| <i>Smarce1</i>        | 0,181804793  | 1,279694837 | 1,313227064 | 1,334297763 | 1,396238684 |
| <i>Laptm4a</i>        | 0,180971457  | 1,203513038 | 1,347919272 | 1,275669073 | 1,536679422 |
| <i>Ythdc1</i>         | 0,171705062  | 1,176642794 | 1,385929426 | 1,348347516 | 1,484732399 |
| <i>Wdr26</i>          | 0,247660314  | 1,347124885 | 1,235814045 | 1,440183149 | 1,547725759 |
| <i>Ncbp1</i>          | 0,223272159  | 1,3460609   | 1,330000741 | 1,484144536 | 1,576290102 |
| <i>Rbbp6</i>          | 0,222912974  | 1,210627025 | 1,477585878 | 1,309918758 | 1,524086558 |
| <i>5330426P16Rik</i>  | 0,148376377  | 1,22207562  | 1,50616136  | 1,402928092 | 1,555645469 |
| <i>Gm20199</i>        | -0,126524007 | 1,381303816 | 1,420921252 | 1,45598198  | 1,506478858 |
| <i>Uchl4</i>          | -0,227113452 | 1,432910066 | 1,373638343 | 1,465558303 | 1,414475383 |
| <i>Nedd9</i>          | 0,310112837  | 1,483053503 | 1,542626033 | 1,438889689 | 1,488407991 |
| <i>Hspb7</i>          | 0,219581195  | 1,522883374 | 1,657370361 | 1,222012052 | 1,348177578 |
| <i>Rabgef1</i>        | 0,244069109  | 1,096496333 | 1,2031515   | 1,07453474  | 1,210709194 |
| <i>Pdha1</i>          | 0,211000009  | 1,23292349  | 1,21025514  | 1,106921587 | 1,232641463 |
| <i>Klk9</i>           | 0,198394337  | 1,196508624 | 1,315538413 | 0,953369403 | 1,367496714 |
| <i>Morn2</i>          | 0,184810928  | 1,07843257  | 1,451114575 | 1,042258468 | 1,069679115 |
| <i>Rap2c</i>          | -0,00762213  | 1,422906389 | 1,412495114 | 1,196723608 | 1,156673839 |
| <i>Plat</i>           | 0,289011685  | 1,085202458 | 0,692596073 | 1,66923266  | 1,645202487 |
| <i>9930111J21Rik2</i> | 0,065786798  | 0,963169256 | 0,965389085 | 1,818914896 | 1,829216875 |
| <i>Ms4a4c</i>         | 0,23557824   | 0,871028805 | 0,985047339 | 1,480218442 | 1,576305592 |
| <i>Rexo2</i>          | 0,339021743  | 0,88776816  | 0,929314091 | 1,416461993 | 1,618327016 |
| <i>Aim2</i>           | 0,180748458  | 0,794894968 | 0,864709916 | 1,299107637 | 1,650659774 |
| <i>Klhdc2</i>         | 0,363474064  | 0,851874533 | 0,76166209  | 1,482195309 | 1,657086492 |
| <i>A430078G23Rik</i>  | 0,315344127  | 1,009000773 | 1,228083457 | 1,542872873 | 1,699930736 |
| <i>Casp8</i>          | 0,297230556  | 1,068164168 | 1,237804765 | 1,387442103 | 1,649963464 |
| <i>Smurf2</i>         | 0,230396042  | 0,866376381 | 1,133771151 | 1,34585417  | 1,592438482 |
| <i>Gm8369</i>         | 0,272512849  | 0,892806949 | 1,178672128 | 1,493612508 | 1,603008082 |
| <i>Mthfd2</i>         | 0,58698351   | 0,879529206 | 1,117712997 | 1,652337065 | 1,566446379 |
| <i>Icosl</i>          | 0,497459385  | 1,016424612 | 0,995936439 | 1,619886391 | 1,522870757 |
| <i>Mrpl27</i>         | 0,164168505  | 1,437389636 | 0,739335965 | 1,392114445 | 1,36129833  |
| <i>Pigc</i>           | 0,056494179  | 1,162999247 | 0,736075632 | 1,354611022 | 1,532190409 |
| <i>Arid5b</i>         | 0,210696646  | 1,311468673 | 1,039438745 | 1,470889846 | 1,361883518 |
| <i>Rpl24</i>          | 0,228172113  | 1,27141441  | 1,156954634 | 1,459957701 | 1,450202147 |
| <i>Fam134b</i>        | 0,046596156  | 1,255751562 | 0,964583224 | 1,513340883 | 1,340146184 |
| <i>A030009H04Rik</i>  | 0,323841789  | 1,290918265 | 0,933535938 | 1,65366671  | 1,436779521 |
| <i>Zfp579</i>         | 0,415285516  | 0,692479441 | 1,021653249 | 0,857394372 | 1,359857757 |
| <i>Naa25</i>          | 0,37532585   | 0,741143833 | 1,022350574 | 0,924224782 | 1,374775357 |
| <i>Rsl24d1</i>        | 0,467739619  | 0,591689799 | 1,093964401 | 0,855600498 | 1,402725955 |

|                      |              |             |             |             |             |
|----------------------|--------------|-------------|-------------|-------------|-------------|
| <i>Mllt1</i>         | 0,465792874  | 0,642089924 | 1,044074643 | 0,844671966 | 1,434517304 |
| <i>Slc52a2</i>       | 0,483709037  | 0,596758592 | 1,18583305  | 0,983865646 | 1,477823365 |
| <i>Clstn1</i>        | 0,354311121  | 0,626715035 | 1,171704134 | 1,001942612 | 1,506074123 |
| <i>Sars</i>          | 0,317426479  | 0,724899734 | 0,952641502 | 1,027242931 | 1,489905264 |
| <i>Stx1a</i>         | 0,352270504  | 0,657843253 | 1,048478356 | 0,91748298  | 1,560451214 |
| <i>C1qbp</i>         | 0,227226183  | 0,756776449 | 1,151145457 | 0,837497203 | 1,418150791 |
| <i>Zfp87</i>         | 0,198949783  | 0,855208366 | 1,226078333 | 0,92560929  | 1,317977541 |
| <i>Pdcd6ip</i>       | 0,267522869  | 0,757321378 | 1,072701058 | 0,917203837 | 1,311236993 |
| <i>Fnbp4</i>         | 0,263214812  | 0,682925319 | 1,07636303  | 0,944728447 | 1,30506502  |
| <i>1200014J11Rik</i> | 0,16477397   | 0,699363163 | 1,12421971  | 0,916523244 | 1,278791406 |
| <i>Dock10</i>        | 0,174410584  | 0,694438506 | 1,067131765 | 0,957959992 | 1,418153288 |
| <i>Alkbh1</i>        | 0,157075981  | 0,724990792 | 1,129464734 | 0,983216545 | 1,35341144  |
| <i>Sec61a1</i>       | 0,243417861  | 0,616958253 | 0,905403936 | 0,791056356 | 1,387921322 |
| <i>Slc15a4</i>       | 0,290272601  | 0,61490909  | 1,011639834 | 0,752895514 | 1,358305416 |
| <i>Gars</i>          | 0,279710646  | 0,529510812 | 1,048077446 | 0,680750677 | 1,450172263 |
| <i>Adamts10</i>      | 0,42319272   | 0,64952432  | 0,9305828   | 0,760957048 | 1,42500973  |
| <i>Fyco1</i>         | 0,437654838  | 0,571914952 | 0,990580114 | 0,677938656 | 1,462599738 |
| <i>Rpa2</i>          | 0,350830627  | 0,509925035 | 1,134830322 | 0,848867479 | 1,228629227 |
| <i>Slamf7</i>        | 0,363761195  | 0,532221075 | 1,209906839 | 0,739579828 | 1,338755738 |
| <i>Gpd2</i>          | 0,215538635  | 0,788577527 | 1,14215663  | 0,6955651   | 1,229626851 |
| <i>Sugt1</i>         | 0,254592229  | 0,690858219 | 1,138291166 | 0,739941093 | 1,304035939 |
| <i>Pus3</i>          | 0,304378182  | 0,729174065 | 0,961741628 | 0,640355102 | 1,290899844 |
| <i>Rps23</i>         | 0,458527805  | 0,855621177 | 1,516023722 | 0,828297935 | 1,228410182 |
| <i>Apex1</i>         | 0,343856454  | 0,69795357  | 1,317610981 | 0,841038672 | 1,151074179 |
| <i>Abhd14a</i>       | 0,352332824  | 0,606560541 | 1,557429592 | 0,714243828 | 1,478419538 |
| <i>Ddc</i>           | 0,542267664  | 0,845238479 | 1,221366043 | 0,914716252 | 1,448127447 |
| <i>Cdkl4</i>         | 0,559990003  | 0,821121819 | 1,267197973 | 0,856622971 | 1,429065965 |
| <i>Chsy1</i>         | 0,45424542   | 0,862407972 | 1,282893603 | 0,774739387 | 1,56828855  |
| <i>Chst15</i>        | 0,565055785  | 0,746996657 | 1,290937598 | 0,661127446 | 1,398122787 |
| <i>Gm20257</i>       | 0,292109681  | 0,845649978 | 1,410885325 | 0,768366258 | 1,422954025 |
| <i>Pou5f2</i>        | 0,447973789  | 1,049133344 | 1,336896455 | 0,745125496 | 1,435431835 |
| <i>Ifng</i>          | 0,043321571  | 1,07852348  | 1,262253202 | 0,591014327 | 1,348711556 |
| <i>2900076A07Rik</i> | -0,089220354 | 0,85069594  | 1,218005383 | 0,687181096 | 1,470064106 |
| <i>Klk8</i>          | 0,056768767  | 0,987148165 | 1,516447781 | 0,61338935  | 1,823193376 |
| <i>Rrp9</i>          | 0,530639076  | 0,642341768 | 1,275367811 | 1,274991544 | 1,767436984 |
| <i>Cox6a1</i>        | 0,461061827  | 0,518822277 | 1,295748017 | 1,312335019 | 1,656786218 |
| <i>1810034E14Rik</i> | 0,234067417  | 0,380982674 | 1,289690913 | 1,189713568 | 1,864828504 |
| <i>Appl2</i>         | 0,346309605  | 0,84119686  | 1,284577605 | 1,423762028 | 1,732101877 |
| <i>Lipt1</i>         | 0,529658381  | 0,828983777 | 1,415735851 | 1,496203454 | 1,709468496 |
| <i>Arpc5</i>         | 0,200337371  | 0,732879417 | 1,439047713 | 1,572340218 | 1,822996447 |
| <i>Fam32a</i>        | 0,655075506  | 0,743132026 | 1,425643291 | 1,282334582 | 1,495030963 |
| <i>Nob1</i>          | 0,525927395  | 0,835486681 | 1,542615607 | 1,22206449  | 1,440703504 |
| <i>Plp2</i>          | 0,514293456  | 0,656768956 | 1,651235563 | 1,328729478 | 1,283233547 |
| <i>Pus1</i>          | 0,251340633  | 0,561573327 | 1,401968762 | 1,23333037  | 1,33440779  |
| <i>Rplp2</i>         | 0,379621079  | 0,728810684 | 1,326102272 | 1,312784406 | 1,33759014  |
| <i>Ankrd34a</i>      | 0,218365837  | 0,541083172 | 0,875943638 | 0,341299324 | 1,184689254 |
| <i>Cox5b</i>         | 0,124339418  | 0,298476918 | 0,927666529 | 0,243158498 | 1,227463067 |
| <i>Klhl28</i>        | -0,035345672 | 0,395185033 | 0,891619424 | 0,643041316 | 1,0177489   |
| <i>Sec61g</i>        | 0,083192618  | 0,310524106 | 0,975012813 | 0,567634943 | 1,073882905 |
| <i>Mki67ip</i>       | -0,147071212 | 0,470525631 | 0,901639937 | 0,396675048 | 1,038447508 |
| <i>Pim2</i>          | 0,153693704  | 0,011163911 | 0,809656683 | 0,643172659 | 1,276480508 |

|                      |              |              |             |             |             |
|----------------------|--------------|--------------|-------------|-------------|-------------|
| <i>Crybb1</i>        | 0,251939235  | 0,115118809  | 0,81999563  | 0,610189252 | 1,383711263 |
| <i>Lrrc14b</i>       | -0,070329081 | -0,03185025  | 0,929291821 | 0,508241789 | 1,328518508 |
| <i>Olf51</i>         | -0,108328527 | 0,142161941  | 0,637006086 | 0,431751528 | 1,472596069 |
| <i>4930579K19Rik</i> | 0,06504307   | 0,374991569  | 0,79883711  | 0,484071711 | 1,208293396 |
| <i>2410002F23Rik</i> | 0,124995051  | 0,353817683  | 0,932507595 | 0,573913264 | 1,267253658 |
| <i>4933402J15Rik</i> | -0,079518298 | 0,201868728  | 0,813987239 | 0,515556175 | 1,150979488 |
| <i>Spryd4</i>        | -0,049513597 | 0,305069486  | 0,723980773 | 0,727930822 | 1,314203611 |
| <i>Klk10</i>         | -0,070583327 | 0,216641463  | 0,695786143 | 0,672163487 | 1,320815686 |
| <i>Timm8b</i>        | 0,403828711  | 0,164634557  | 0,902142497 | 0,576782792 | 1,455136465 |
| <i>Wnt8a</i>         | 0,389928672  | -0,112065366 | 1,010190415 | 0,418456916 | 1,484591245 |
| <i>Chpf2</i>         | 0,646293173  | 0,062217382  | 0,973682386 | 0,667809245 | 1,352493852 |
| <i>1700020L24Rik</i> | 0,573157708  | 0,130044292  | 0,759397655 | 0,328950903 | 1,145395985 |
| <i>4930592I03Rik</i> | 0,516619533  | -0,165924276 | 0,738626028 | 0,168049312 | 1,24758703  |
| <i>Taar5</i>         | 0,634890562  | -0,12104075  | 0,371017876 | 0,513163261 | 1,245444274 |
| <i>D230037D09Rik</i> | 0,355920668  | -0,044094525 | 0,650266284 | 0,765593633 | 1,210872659 |
| <i>Gzmm</i>          | 0,593147138  | 0,255754874  | 0,38175949  | 0,503128782 | 1,052955266 |
| <i>Nudt18</i>        | 0,540733928  | 0,131676013  | 0,403681645 | 0,669636852 | 1,013197556 |
| <i>Man2b1</i>        | 0,554533918  | 0,405383576  | 0,40707372  | 0,779444464 | 1,003680138 |
| <i>Tut1</i>          | 0,334648693  | 0,474030424  | 0,616639586 | 0,595865661 | 1,093008241 |
| <i>Gpank1</i>        | 0,300528411  | 0,407486459  | 0,719727163 | 0,522820457 | 1,151713284 |
| <i>L3mbtl2</i>       | 0,400692469  | 0,472121808  | 0,641560542 | 0,361512217 | 1,019104443 |
| <i>S100a3</i>        | 0,19408061   | 0,332452758  | 0,430434376 | 0,28869475  | 1,19139545  |
| <i>Zfp688</i>        | 0,21485792   | 0,407887084  | 0,436364089 | 0,363400566 | 1,376988995 |
| <i>Clp1</i>          | 0,201267547  | 0,209775083  | 0,681750091 | 0,603830474 | 1,294536268 |
| <i>Aen</i>           | 0,194118137  | 0,15601236   | 0,648547982 | 0,522015689 | 1,319205704 |
| <i>5033406O09Rik</i> | 0,325286148  | 0,165512045  | 0,708352146 | 0,402861228 | 1,213215525 |
| <i>Aamp</i>          | 0,372252308  | 0,259407267  | 0,621518904 | 0,424327592 | 1,011612585 |
| <i>4933430H16Rik</i> | 0,294321714  | 0,249691126  | 0,664628117 | 0,367150885 | 1,064534283 |
| <i>Cd320</i>         | 0,244262054  | 0,13381646   | 0,495512092 | 0,412776397 | 1,052356175 |
| <i>Tlr1</i>          | -0,269993202 | 0,081480892  | 0,242410833 | 0,71116714  | 1,043335485 |
| <i>Ncf4</i>          | 0,126574761  | 0,232928283  | 0,344738026 | 0,621401982 | 1,022776386 |
| <i>Piga</i>          | -0,023626629 | 0,020127486  | 0,539072983 | 0,41970991  | 1,211595249 |
| <i>1700029H14Rik</i> | -0,033513445 | 0,052782321  | 0,534100545 | 0,475124316 | 1,000050393 |
| <i>Glyctk</i>        | 0,245481549  | 0,263491692  | 0,496018202 | 0,613569113 | 1,096938921 |
| <i>Comp</i>          | 0,344314005  | 0,328962551  | 0,517212962 | 0,656083405 | 1,011042682 |
| <i>Fam96a</i>        | 0,234909321  | 0,454690858  | 0,390923889 | 0,607155537 | 1,045401559 |
| <i>Ddx41</i>         | 0,193614081  | 0,389443701  | 0,405282474 | 0,607883304 | 1,151899527 |
| <i>1110018J18Rik</i> | 0,15381206   | 0,34241387   | 0,497885564 | 0,7531896   | 1,266167221 |
| <i>Sidt1</i>         | 0,233608124  | 0,403179709  | 0,548680071 | 0,7736272   | 1,302083967 |
| <i>Nolc1</i>         | 0,372438561  | 0,475206458  | 0,403996532 | 0,695750854 | 1,020458137 |
| <i>Trim39</i>        | 0,429929935  | 0,576251003  | 0,475497624 | 0,783698038 | 1,017119734 |
| <i>Psmg3</i>         | 0,246414983  | 0,554143276  | 0,366283733 | 0,787300127 | 1,034393574 |
| <i>Mrps14</i>        | 0,201820615  | 0,346395294  | 0,619588656 | 0,57191917  | 1,100702701 |
| <i>Timm17a</i>       | 0,131591911  | 0,435085761  | 0,670474078 | 0,590829131 | 1,157823765 |
| <i>Pars2</i>         | 0,128505021  | 0,407380654  | 0,626331808 | 0,421283616 | 1,062752221 |
| <i>Vamp4</i>         | 0,04180089   | 0,486251558  | 0,736254247 | 0,595416158 | 1,060092416 |
| <i>Grpel1</i>        | 0,000533244  | 0,434333723  | 0,656248037 | 0,487427657 | 1,004365558 |
| <i>Pdcd6</i>         | -0,11764126  | 0,268967268  | 0,462450518 | 0,588001273 | 1,013057993 |
| <i>BC094916</i>      | -0,563712122 | 0,273970909  | 0,487795257 | 0,698060075 | 1,019218111 |
| <i>Naa38</i>         | -0,193855027 | 0,362160701  | 0,508017257 | 0,561933163 | 1,142832965 |
| <i>2700090O03Rik</i> | -0,116093146 | 0,494718565  | 0,435261474 | 0,586935301 | 1,004899435 |

|                      |              |             |             |             |             |
|----------------------|--------------|-------------|-------------|-------------|-------------|
| <i>Cox18</i>         | -0,201098134 | 0,423343787 | 0,476851544 | 0,682364369 | 1,02201413  |
| <i>Wdr45l</i>        | 0,181466661  | 0,584745284 | 0,815620926 | 0,717987105 | 1,083644249 |
| <i>Kars</i>          | 0,191338185  | 0,570784731 | 0,784331873 | 0,697553288 | 1,143134612 |
| <i>Zfp472</i>        | 0,149935157  | 0,500564596 | 0,807810722 | 0,639591017 | 1,068582125 |
| <i>Fosl2</i>         | 0,090375171  | 0,562111633 | 0,855014588 | 0,619812757 | 1,168717161 |
| <i>Smad2</i>         | 0,197101432  | 0,669511203 | 0,790782157 | 0,680569622 | 1,085611996 |
| <i>Prpf18</i>        | 0,141501909  | 0,649158102 | 0,786661986 | 0,664311882 | 1,021132669 |
| <i>Adam17</i>        | 0,152682266  | 0,595509089 | 0,727911929 | 0,622195636 | 1,001424139 |
| <i>Tspyl2</i>        | 0,182651386  | 0,562661313 | 0,6346069   | 0,625743624 | 1,056045396 |
| <i>Hspd1</i>         | 0,164402673  | 0,469522202 | 0,693064516 | 0,609394983 | 1,02381144  |
| <i>Klre1</i>         | -0,711871032 | 0,557508089 | 0,748402585 | 0,556259882 | 1,239449173 |
| <i>Ly9</i>           | 0,12159946   | 0,451813129 | 0,595845785 | 0,762011442 | 1,024012928 |
| <i>Cript</i>         | -0,016001538 | 0,425484255 | 0,634052639 | 0,731532143 | 1,039914437 |
| <i>3110001I22Rik</i> | -0,113322711 | 0,472463285 | 0,673654572 | 0,802084172 | 1,052106849 |
| <i>Kdm6a</i>         | -0,147664673 | 0,521986609 | 0,708289032 | 0,843210549 | 1,005659804 |
| <i>AW549877</i>      | 0,034565733  | 0,511327131 | 0,604129345 | 0,857587421 | 1,004741968 |
| <i>Cct7</i>          | 0,089173509  | 0,39559606  | 0,689257099 | 0,706583361 | 1,061744582 |
| <i>Napg</i>          | 0,10600329   | 0,383165034 | 0,774306566 | 0,696242739 | 1,006550554 |
| <i>Nutf2</i>         | 0,161552805  | 0,433191328 | 0,688711307 | 0,783240748 | 1,048925767 |
| <i>Smu1</i>          | 0,182266776  | 0,470955059 | 0,681292898 | 0,782160832 | 1,054319202 |
| <i>Nutf2-ps1</i>     | 0,153825933  | 0,414793623 | 0,738098788 | 0,831494064 | 1,073950538 |
| <i>Fam48a</i>        | 0,041752465  | 0,556578779 | 0,839271085 | 0,717475426 | 1,047769473 |
| <i>Herc4</i>         | 0,064483753  | 0,530728706 | 0,745623695 | 0,790199958 | 1,01097818  |
| <i>Dse</i>           | -0,1606038   | 0,542616575 | 0,789801814 | 0,810654337 | 1,177044515 |
| <i>Fbxw2</i>         | 0,089728591  | 0,508302388 | 0,766163189 | 0,811053696 | 1,149558903 |
| <i>2810403A07Rik</i> | 0,178635903  | 0,556750572 | 0,846602324 | 0,879664183 | 1,172924843 |
| <i>Alkbh5</i>        | 0,193702312  | 0,534586486 | 0,750628277 | 0,835798787 | 1,202267256 |
| <i>Mak16</i>         | 0,111966243  | 0,390888061 | 0,818374052 | 0,843440941 | 1,205223964 |
| <i>Mob1a</i>         | 0,119797887  | 0,488486891 | 0,734529052 | 0,93110478  | 1,190406888 |
| <i>Itga4</i>         | 0,067151962  | 0,557976725 | 0,758713906 | 0,987263364 | 1,2790474   |
| <i>Zkscan14</i>      | 0,145351392  | 0,591248997 | 0,663423076 | 0,915867993 | 1,346378605 |
| <i>Dhx16</i>         | 0,22774379   | 0,581175878 | 0,674681295 | 0,926188069 | 1,293864068 |
| <i>Eif1ad</i>        | 0,261874626  | 0,585603941 | 0,622166712 | 0,816691591 | 1,240291323 |
| <i>D630032N06Rik</i> | 0,537506758  | 0,383748197 | 0,626608714 | 0,645541168 | 1,435476482 |
| <i>Aoc2</i>          | 0,551946419  | 0,450570158 | 0,605486183 | 0,658970183 | 1,282124694 |
| <i>Acap3</i>         | 0,475941999  | 0,382802219 | 0,538910491 | 0,577454664 | 1,190617995 |
| <i>Mlst8</i>         | 0,610258412  | 0,486026305 | 0,700990647 | 0,459904329 | 1,371289445 |
| <i>1600002H07Rik</i> | 0,715511411  | 0,527090488 | 0,714964941 | 0,511390425 | 1,301048762 |
| <i>Mblac1</i>        | 0,680632686  | 0,494143761 | 0,685382169 | 0,628034099 | 1,442220545 |
| <i>Epsti1</i>        | 0,663983323  | 0,589204931 | 0,783362152 | 0,557426565 | 1,395718712 |
| <i>Aph1a</i>         | 0,676419855  | 0,606553592 | 0,738751059 | 0,472626002 | 1,349062861 |
| <i>3200002M19Rik</i> | 0,626457242  | 0,680311888 | 0,775061317 | 0,523177776 | 1,3138225   |
| <i>lqcg</i>          | 0,497394819  | 0,593431799 | 0,721840913 | 0,659398691 | 1,002349029 |
| <i>Lsm6</i>          | 0,465977915  | 0,674455544 | 0,777670306 | 0,650272338 | 1,000718228 |
| <i>Tpm1</i>          | 0,394982938  | 0,598842171 | 0,773654031 | 0,765614897 | 1,048022469 |
| <i>Prkrip1</i>       | 0,354694304  | 0,597302454 | 0,746296758 | 0,738624189 | 1,01255092  |
| <i>Hrh2</i>          | 0,497408374  | 0,704733769 | 0,691815206 | 0,75139965  | 1,119056704 |
| <i>Afg3l1</i>        | 0,430462993  | 0,675498794 | 0,763941357 | 0,740699119 | 1,089649704 |
| <i>Maneal</i>        | 0,397473736  | 0,666015335 | 0,668303351 | 0,778179299 | 1,125323605 |
| <i>Eif2b1</i>        | 0,418747571  | 0,609217912 | 0,693673089 | 0,697046157 | 1,136981675 |
| <i>Plod3</i>         | 0,406906019  | 0,581684257 | 0,648099419 | 0,640776815 | 1,020913202 |

|                      |              |             |             |             |             |
|----------------------|--------------|-------------|-------------|-------------|-------------|
| <i>Gart</i>          | 0,370451833  | 0,637846508 | 0,570810889 | 0,691991304 | 1,001444517 |
| <i>Serhl</i>         | 0,333708666  | 0,698185193 | 0,685973757 | 0,50151108  | 1,197380547 |
| <i>Nfe2</i>          | 0,253785792  | 0,613054246 | 0,668960699 | 0,589503198 | 1,223259094 |
| <i>Syt11</i>         | 0,327930014  | 0,605246017 | 0,729478295 | 0,477466024 | 1,077126748 |
| <i>Arrdc1</i>        | 0,46660941   | 0,256002652 | 0,870026421 | 0,668685316 | 1,034303422 |
| <i>Snip1</i>         | 0,328776703  | 0,386030482 | 0,956161368 | 0,675305692 | 1,065858294 |
| <i>Ppp1r8</i>        | 0,490299736  | 0,494160046 | 0,914717385 | 0,761811009 | 1,074581897 |
| <i>Raver1</i>        | 0,480139923  | 0,492389963 | 0,946253049 | 0,685849518 | 1,078678832 |
| <i>Trpm4</i>         | 0,504663225  | 0,487017472 | 0,853725727 | 0,713028516 | 1,109505885 |
| <i>Wdr90</i>         | 0,503996407  | 0,504542431 | 0,839547718 | 0,71286446  | 1,13583802  |
| <i>Rangap1</i>       | 0,462514201  | 0,498879881 | 0,818724056 | 0,624574362 | 1,046096415 |
| <i>Stx5a</i>         | 0,325877791  | 0,460008444 | 0,661580036 | 0,661584085 | 1,021318602 |
| <i>Itpa</i>          | 0,362716299  | 0,499033096 | 0,649670972 | 0,741722943 | 1,04311767  |
| <i>Taf1d</i>         | 0,416901417  | 0,43304761  | 0,688094439 | 0,640873179 | 1,026203865 |
| <i>Dync1h1</i>       | 0,433530512  | 0,493911199 | 0,6528118   | 0,710053791 | 1,129756172 |
| <i>Dph2</i>          | 0,437405048  | 0,433409103 | 0,634100916 | 0,768843585 | 1,074334681 |
| <i>Ppib</i>          | 0,275883923  | 0,362679212 | 0,676506966 | 0,67310908  | 1,053873319 |
| <i>Gm4566</i>        | 0,336578712  | 0,368641634 | 0,690785334 | 0,732877442 | 1,096137271 |
| <i>1810006J02Rik</i> | 0,335515866  | 0,397823805 | 0,832783962 | 0,6471974   | 1,139802878 |
| <i>E330016A19Rik</i> | 0,409084232  | 0,345251998 | 0,810706834 | 0,708527254 | 1,171248318 |
| <i>Cdc34</i>         | 0,444516532  | 0,388335024 | 0,789620388 | 0,589003133 | 1,138531336 |
| <i>Tkt</i>           | 0,427925375  | 0,400786096 | 0,724874636 | 0,557373903 | 1,123736715 |
| <i>Skiv2l</i>        | 0,489326709  | 0,412457242 | 0,737208568 | 0,751906287 | 1,073764029 |
| <i>Cpsf4</i>         | 0,471700674  | 0,411768994 | 0,771803156 | 0,833276126 | 1,04560241  |
| <i>E4f1</i>          | 0,562853767  | 0,31976444  | 0,684964733 | 0,797414599 | 1,042314082 |
| <i>Cks2</i>          | 0,421409704  | 0,340038954 | 0,629354338 | 0,79580345  | 1,144798583 |
| <i>Mtx1</i>          | 0,411829742  | 0,372604056 | 0,62673272  | 0,824646951 | 1,133324856 |
| <i>Armc10</i>        | 0,526852764  | 0,481210056 | 0,777910806 | 0,80578818  | 1,086914639 |
| <i>Golga7</i>        | 0,55813362   | 0,539985326 | 0,778947358 | 0,823999813 | 1,056590434 |
| <i>Fam118a</i>       | 0,551263993  | 0,576501275 | 0,717374719 | 0,773149916 | 1,006472466 |
| <i>4930471M23Rik</i> | 0,48930824   | 0,468814345 | 0,641601977 | 0,895561679 | 1,03904067  |
| <i>Mrpl24</i>        | 0,438616891  | 0,413501584 | 0,846442023 | 0,816508964 | 1,23056805  |
| <i>Opa3</i>          | 0,382729136  | 0,390936257 | 0,77430625  | 0,847362461 | 1,177494471 |
| <i>Mrpl30</i>        | 0,452534751  | 0,428141293 | 0,759519486 | 0,936699998 | 1,284192873 |
| <i>Ubxn1</i>         | 0,406634349  | 0,359015656 | 0,899156199 | 0,921935923 | 1,24595749  |
| <i>AI646023</i>      | 0,409136697  | 0,403628553 | 0,685622602 | 0,818483839 | 1,410742513 |
| <i>Tmed9</i>         | 0,503485178  | 0,318926599 | 0,745227189 | 0,885752164 | 1,403197188 |
| <i>Myod1</i>         | 0,286335928  | 0,240993087 | 1,368643573 | 0,413551682 | 1,605496492 |
| <i>Upk2</i>          | 0,237444969  | 0,202799896 | 1,222011682 | 0,892165384 | 1,517297859 |
| <i>Rassf1</i>        | 0,39018125   | 0,707653349 | 1,166872008 | 0,826034369 | 1,610744599 |
| <i>4930469G21Rik</i> | 0,438279689  | 0,643475434 | 1,184924248 | 0,762395227 | 1,672659859 |
| <i>Pex16</i>         | 0,459648233  | 0,683204831 | 1,26946188  | 0,837863422 | 1,530987615 |
| <i>Ggt1</i>          | 0,387856263  | 0,526423866 | 1,220038024 | 0,823158778 | 1,728532331 |
| <i>Kcna2</i>         | 0,409119715  | 0,692268773 | 1,360275038 | 0,638864107 | 1,710994561 |
| <i>Ak1</i>           | 0,45169413   | 0,568378539 | 1,154650402 | 0,548924916 | 1,494486502 |
| <i>Stx2</i>          | 0,51502135   | 0,363740862 | 1,152652292 | 0,656944446 | 1,614637291 |
| <i>Psemb6</i>        | 0,053492289  | 0,152275187 | 0,861350771 | 0,711494606 | 1,601356892 |
| <i>B4galt7</i>       | 0,158793633  | 0,258205476 | 0,848932085 | 0,533877484 | 1,628231902 |
| <i>Mrps16</i>        | 0,1379808    | 0,313262046 | 0,99218176  | 0,696945527 | 1,383987489 |
| <i>Gzmb</i>          | -0,515866788 | 0,547774912 | 0,90871392  | 0,6919493   | 1,517635533 |
| <i>Eomes</i>         | 0,072618571  | 0,531909198 | 0,804264673 | 0,452730385 | 1,599949478 |

|                  |              |              |              |             |             |
|------------------|--------------|--------------|--------------|-------------|-------------|
| 4833427F10Rik    | 0,012912444  | 0,612767802  | 0,959577589  | 0,98826582  | 1,801348029 |
| <i>Cd48</i>      | 0,117428274  | 0,67421631   | 0,919699421  | 0,938287399 | 1,688648494 |
| <i>Art2b</i>     | -0,091010672 | 0,133885853  | 1,115706112  | 1,35554031  | 1,853264978 |
| <i>Klrd1</i>     | -0,726679427 | 0,053920134  | 0,825651436  | 0,87264697  | 2,121676503 |
| <i>Fam46a</i>    | -0,081455861 | -0,251097248 | 0,220499743  | 1,146876824 | 2,205951623 |
| <i>Olfr372</i>   | -0,049259239 | -0,133641355 | -0,095977412 | 1,004056451 | 1,30791255  |
| <i>Hist1h2br</i> | 0            | 0            | 0            | 0           | 2,39966057  |
| <i>Hist1h2bq</i> | 0            | 0            | 0            | 0           | 2,39966057  |
| <i>Gm3750</i>    | 0            | -2,989382464 | 0            | 0           | 3,563402221 |
| <i>Aldh2</i>     | 1,40906633   | 1,059518292  | 0,825436079  | 0,962196822 | 0,854320924 |
| 4933400C05Rik    | 1,378155619  | 0,933839078  | 0,801888021  | 1,001525732 | 0,865412185 |
| <i>Efcab8</i>    | 1,465739839  | 0,982774527  | 0,965860867  | 0,957398507 | 0,756359932 |
| <i>Fabp5</i>     | 1,399894158  | 0,952130456  | 0,734299944  | 0,960645738 | 0,66559005  |
| <i>Tulp2</i>     | 1,195102578  | 0,870020472  | 0,862083447  | 1,065510215 | 0,803022225 |
| C130050O18Rik    | 1,319350359  | 0,770524024  | 0,885427503  | 0,970950923 | 0,713632964 |
| <i>Dhcr7</i>     | 1,241506743  | 1,046796227  | 0,943786326  | 0,993429773 | 0,818543032 |
| <i>Slc38a6</i>   | 1,203309296  | 0,98271722   | 0,876719137  | 1,030514099 | 0,796736915 |
| <i>Efhc1</i>     | 1,176582493  | 1,139589559  | 0,866871305  | 0,97346796  | 0,691580534 |
| <i>Accn3</i>     | 1,294346325  | 0,926898467  | 0,601911406  | 0,975145448 | 0,946030309 |
| <i>Nudt14</i>    | 1,362156272  | 0,965986382  | 0,615168776  | 0,885393736 | 0,996821022 |
| <i>Rnpepl1</i>   | 1,213650527  | 0,781188309  | 0,66556601   | 0,864152517 | 0,913132775 |
| 2310014F07Rik    | 1,030133662  | 1,065051246  | 0,985559316  | 1,244024828 | 0,805461045 |
| <i>Ch25h</i>     | 0,964126986  | 1,023745149  | 0,948731269  | 1,280115826 | 0,697838699 |
| <i>Cks1b</i>     | 1,028254688  | 1,15386423   | 1,014057644  | 1,350266539 | 0,704165818 |
| <i>Mrps17</i>    | 0,868592823  | 0,933591441  | 0,834308582  | 1,342579366 | 0,804641226 |
| 1700020N18Rik    | 1,158313288  | 0,713342124  | 0,9482466    | 1,40249284  | 0,665873662 |
| 4930562F07Rik    | 1,135459856  | 1,109645073  | 0,945310482  | 1,329378454 | 1,088303932 |
| 1700066B19Rik    | 1,084287846  | 1,081583161  | 0,866932433  | 1,314959682 | 0,996777129 |
| <i>Pard6a</i>    | 1,150565181  | 1,084213458  | 0,880823901  | 1,460893379 | 1,169092706 |
| 3110070M22Rik    | 1,041930246  | 1,2693647    | 0,658358204  | 1,284870365 | 1,1899658   |
| <i>Vmac</i>      | 1,270469244  | 1,165538028  | 0,698546264  | 1,205785501 | 0,948578192 |
| <i>Mrps7</i>     | 1,233642399  | 1,188781792  | 0,784934243  | 1,185218618 | 1,140669671 |
| <i>Gm17762</i>   | 0,969757913  | 0,968689853  | 0,642453828  | 1,41752182  | 1,070589407 |
| <i>Rabac1</i>    | 1,024748977  | 1,027416835  | 0,608921915  | 1,568423831 | 0,981868014 |
| <i>Dap3</i>      | 1,014242852  | 0,894907178  | 1,017760676  | 0,982705815 | 0,991050063 |
| <i>Brpf3</i>     | 0,995429421  | 0,882714373  | 1,051629689  | 0,906897515 | 0,933849245 |
| <i>Csrp2</i>     | 1,020518102  | 0,974494369  | 0,97731491   | 1,007609332 | 0,949671766 |
| <i>Ltbr</i>      | 0,994227656  | 0,99080047   | 1,002976783  | 1,033770328 | 0,865891951 |
| <i>Ston2</i>     | 0,900373821  | 1,074688147  | 1,043088805  | 0,867838275 | 0,881474905 |
| <i>Snx15</i>     | 0,931242313  | 0,991726383  | 1,028480446  | 0,957618583 | 0,766845783 |
| <i>Coro7</i>     | 1,007505344  | 0,996803512  | 0,977980138  | 0,904456739 | 1,054654603 |
| <i>Qrich2</i>    | 0,948384077  | 1,059082871  | 0,932081451  | 0,903715675 | 1,053645615 |
| <i>Vamp5</i>     | 0,92800602   | 1,013423256  | 0,882045018  | 0,836749757 | 1,029616384 |
| <i>Hivep1</i>    | 0,940906527  | 1,018746666  | 0,866731808  | 0,856541402 | 0,964434867 |
| <i>Gys1</i>      | 0,797013005  | 0,967866645  | 0,962700767  | 0,945498403 | 1,02961222  |
| <i>Acrbp</i>     | 0,831204582  | 0,935781654  | 0,948536387  | 0,930859164 | 1,006274649 |
| <i>Pigp</i>      | 0,819977868  | 0,989971087  | 0,997194484  | 0,910088101 | 1,039238154 |
| <i>Ccdc137</i>   | 0,878721487  | 1,022348768  | 0,940362379  | 0,913126863 | 0,994486837 |
| <i>Cenpn</i>     | 0,781938372  | 0,943437015  | 1,151597148  | 0,910043205 | 1,022278419 |
| <i>Alpk3</i>     | 0,84283351   | 0,969253868  | 1,061084346  | 1,023916596 | 1,037202315 |
| <i>Pcdhgc5</i>   | 0,841049355  | 0,855796129  | 1,086880686  | 0,945206542 | 0,942301136 |

|                 |             |             |             |             |             |
|-----------------|-------------|-------------|-------------|-------------|-------------|
| <i>Pcdhgc3</i>  | 0,876939558 | 0,868441057 | 1,023006713 | 0,936951929 | 0,920496078 |
| <i>Myl2</i>     | 0,818719875 | 0,953231129 | 1,069345718 | 0,980101058 | 0,892707129 |
| <i>Rexo4</i>    | 0,863667526 | 1,041443023 | 1,135435456 | 0,957140212 | 0,910177165 |
| <i>Pcdhgc4</i>  | 0,94368275  | 0,947372428 | 1,15262551  | 1,009638788 | 0,925511729 |
| <i>Dusp22</i>   | 0,946899605 | 0,942625538 | 1,109036898 | 0,918792835 | 1,073485522 |
| <i>Dph1</i>     | 0,968043287 | 0,913171046 | 1,043941075 | 0,865356582 | 1,049793931 |
| <i>Gpsm1</i>    | 0,933684932 | 1,03319359  | 1,113113549 | 0,903049273 | 1,024383311 |
| <i>Akr7a5</i>   | 1,078120366 | 0,855949277 | 0,781960694 | 1,003627706 | 1,154662492 |
| <i>Abhd11</i>   | 1,058237833 | 0,966348752 | 0,758117354 | 0,981305526 | 1,132659277 |
| <i>Myh7b</i>    | 1,022310509 | 0,837400142 | 0,731438118 | 1,016235875 | 1,01546978  |
| <i>BC017643</i> | 1,064789219 | 0,87632856  | 0,897565313 | 0,860075477 | 1,030332688 |
| <i>Aacs</i>     | 1,118204124 | 0,860802399 | 0,959893455 | 0,851947489 | 1,000350577 |
| <i>March9</i>   | 1,142191574 | 0,8345699   | 0,989142028 | 0,969499354 | 1,026246835 |
| <i>Sgta</i>     | 1,092058265 | 0,942735746 | 0,932034974 | 1,011949265 | 1,031478013 |
| <i>Jrk</i>      | 1,097343636 | 0,937938972 | 0,828759777 | 1,064086081 | 0,981363181 |
| <i>Gstk1</i>    | 1,11149188  | 0,953291082 | 0,934097508 | 1,048665551 | 0,907971773 |
| <i>Clec3b</i>   | 1,104585046 | 1,061492362 | 0,896463642 | 0,975625978 | 0,998504924 |
| <i>Gm166</i>    | 1,03478181  | 1,045728358 | 0,843618284 | 0,952784636 | 0,928906908 |
| <i>Ethe1</i>    | 0,955318004 | 0,960158894 | 0,88412782  | 1,108498339 | 0,977246247 |
| <i>Bsn</i>      | 1,022333494 | 0,96234632  | 0,878826795 | 1,089911787 | 1,066847886 |
| <i>Inpp5d</i>   | 0,747873021 | 1,006538066 | 0,891463886 | 0,905095885 | 1,047752705 |
| <i>Amigo1</i>   | 0,721657342 | 1,006146551 | 0,934019802 | 0,920273929 | 1,07840514  |
| <i>Snx9</i>     | 0,80888487  | 1,139734559 | 0,899464767 | 0,891414315 | 1,10932875  |
| <i>Slc25a35</i> | 0,703060638 | 1,017624895 | 0,873856434 | 0,945934721 | 1,159181092 |
| <i>Tada1</i>    | 0,685242654 | 1,038983099 | 0,932204724 | 1,008466477 | 1,130109324 |
| <i>Erp27</i>    | 0,739207815 | 1,014503824 | 0,948807349 | 1,017316532 | 1,219582759 |
| <i>Apc2</i>     | 0,785469829 | 0,97907998  | 0,804039057 | 1,067573192 | 1,197595115 |
| <i>Cln3</i>     | 0,838736383 | 0,938839237 | 0,831612532 | 0,999797641 | 1,160025814 |
| <i>H2-Eb1</i>   | 0,845398626 | 0,957739875 | 0,795119517 | 1,021283693 | 1,035765253 |
| <i>Zc3h4</i>    | 0,857416132 | 0,927462277 | 1,053031782 | 1,030623785 | 1,253778716 |
| <i>Gm1604b</i>  | 0,846652459 | 0,988909775 | 1,078181265 | 1,050811775 | 1,257436464 |
| <i>Rpusd3</i>   | 0,805595241 | 0,972786769 | 0,968737608 | 1,133895635 | 1,192975839 |
| <i>Mettl21a</i> | 0,828690807 | 1,111115816 | 1,031409989 | 1,105674045 | 1,30342668  |
| <i>Nr4a3</i>    | 0,826355    | 1,040348796 | 0,982231192 | 1,045534481 | 1,313129472 |
| <i>Acyp1</i>    | 0,889839458 | 1,074756256 | 0,958561412 | 0,968849155 | 1,208432121 |
| <i>Atg16l2</i>  | 0,873210233 | 1,061820917 | 0,988077222 | 0,931804516 | 1,18168516  |
| <i>Gdgd3</i>    | 0,826339131 | 1,00202103  | 0,945881471 | 0,947019218 | 1,205277325 |
| <i>Mob3c</i>    | 0,786739627 | 1,113447896 | 0,90795805  | 0,966069018 | 1,2771844   |
| <i>Casc1</i>    | 0,997827841 | 1,144424879 | 1,042208677 | 1,047810332 | 0,999316081 |
| <i>Mfsd7b</i>   | 0,918521183 | 1,111921043 | 1,075532921 | 1,073979139 | 1,00848941  |
| <i>Slc25a19</i> | 0,88717372  | 1,114503236 | 1,043282735 | 0,959979644 | 1,000727251 |
| <i>Tmem217</i>  | 0,921665855 | 1,189156107 | 1,075572041 | 0,961208777 | 1,005491431 |
| <i>Msrb2</i>    | 0,892095177 | 1,202643316 | 1,07110612  | 1,044658952 | 1,009977488 |
| <i>Taf3</i>     | 0,887804955 | 1,203024889 | 1,062141043 | 1,130824165 | 1,057768949 |
| <i>Cmtm3</i>    | 0,853788701 | 1,283684641 | 1,028102056 | 1,033080487 | 1,024329764 |
| <i>Lmln</i>     | 0,863491463 | 1,084373328 | 0,894957353 | 0,998238378 | 0,995708165 |
| <i>Eid1</i>     | 0,81059427  | 1,094385984 | 0,971809912 | 1,025289399 | 0,987021786 |
| <i>Map3k5</i>   | 0,899031375 | 1,166822917 | 0,935482892 | 1,101554825 | 1,030943544 |
| <i>Abhd16a</i>  | 0,85708442  | 1,12561509  | 0,912990298 | 1,117775777 | 1,004343814 |
| <i>Selp</i>     | 0,689467298 | 1,195273749 | 1,029340513 | 1,096087971 | 1,12472768  |
| <i>Tnnc1</i>    | 0,691199381 | 1,18374408  | 1,073929886 | 1,106978039 | 1,105603184 |

|                      |             |             |             |             |             |
|----------------------|-------------|-------------|-------------|-------------|-------------|
| <i>Rnf103</i>        | 0,727474077 | 1,224175321 | 1,086182449 | 1,179638195 | 1,087018961 |
| <i>Mgrn1</i>         | 0,729369344 | 1,214507727 | 1,09721765  | 1,079205407 | 1,153980531 |
| <i>Rb1</i>           | 0,767359751 | 1,175091702 | 1,142621333 | 1,063617075 | 1,132578077 |
| <i>Fndc7</i>         | 0,75933677  | 1,146346997 | 1,068648468 | 1,056947739 | 1,135367348 |
| <i>Cap2</i>          | 0,7840132   | 1,106495287 | 1,071096091 | 1,011430589 | 1,084414948 |
| <i>lpmk</i>          | 0,716668736 | 1,173664788 | 1,005705986 | 1,023946967 | 1,022014431 |
| <i>Lass5</i>         | 0,898496658 | 1,055276679 | 0,956242376 | 1,077327738 | 1,161796231 |
| <i>Xpot</i>          | 0,973276365 | 1,062378768 | 0,87598859  | 1,064829124 | 1,091822003 |
| <i>Oit3</i>          | 0,971746353 | 1,054280645 | 0,927801571 | 1,196848007 | 1,08658448  |
| <i>Caskin2</i>       | 1,006280914 | 1,007581402 | 0,956645883 | 1,03244447  | 1,171810266 |
| <i>Gnmt</i>          | 1,108209352 | 1,001621245 | 0,987602133 | 1,072769914 | 1,120513667 |
| <i>Tmem245</i>       | 1,054566152 | 1,030458948 | 0,987951627 | 0,952831443 | 1,127091415 |
| <i>Tmco6</i>         | 1,066332107 | 1,091752028 | 0,967888461 | 0,975031894 | 1,094524494 |
| <i>4933407K13Rik</i> | 1,156195103 | 1,124338405 | 0,99052779  | 1,039164794 | 1,368255131 |
| <i>Chmp6</i>         | 1,044621926 | 1,077768793 | 0,997855805 | 0,955643786 | 1,305365193 |
| <i>Cdc25b</i>        | 1,228149962 | 1,126854844 | 0,914437259 | 0,94998541  | 1,215958745 |
| <i>Rptor</i>         | 1,229854147 | 1,024440259 | 1,042577264 | 0,954787461 | 1,078228634 |
| <i>Ndst1</i>         | 1,172006869 | 1,090763679 | 0,97828292  | 0,878746435 | 1,007972219 |
| <i>Epas1</i>         | 1,229748055 | 1,014644352 | 1,027667879 | 1,058976256 | 1,038405307 |
| <i>2900041M22Rik</i> | 1,261915348 | 1,060890131 | 1,090260515 | 1,051999729 | 0,973713475 |
| <i>Nt5c2</i>         | 1,218357483 | 1,153131521 | 1,110728858 | 0,984487981 | 0,95042476  |
| <i>Pcnx</i>          | 1,16793225  | 1,135468638 | 1,154378437 | 0,97668691  | 0,989396378 |
| <i>Smyd2</i>         | 1,205787896 | 1,163383709 | 1,176231841 | 0,990183188 | 1,095421115 |
| <i>Senp1</i>         | 1,042047069 | 1,151994609 | 1,003915168 | 0,859239902 | 1,054003852 |
| <i>Ddx28</i>         | 1,025859488 | 1,112654226 | 1,061207367 | 0,940615265 | 0,94120411  |
| <i>Rabgga</i>        | 1,055785621 | 1,082148248 | 1,051339407 | 0,923247425 | 1,076321574 |
| <i>Dcakd</i>         | 1,061738365 | 1,044044235 | 1,0929979   | 0,954795756 | 1,126825803 |
| <i>Ucp3</i>          | 1,063772987 | 1,070109323 | 1,159885449 | 0,918339403 | 1,105557982 |
| <i>Fam98c</i>        | 1,079984044 | 0,782285928 | 1,205682768 | 0,877984292 | 1,042238547 |
| <i>Cdc42ep1</i>      | 1,128133582 | 0,844775465 | 1,295539558 | 0,917255994 | 1,145402763 |
| <i>Pip5k1l</i>       | 1,134444064 | 0,940429422 | 1,159470413 | 0,850824779 | 1,192233461 |
| <i>4833419F23Rik</i> | 1,130982123 | 0,840699667 | 1,199398242 | 0,884064181 | 1,295325745 |
| <i>Tmem229b</i>      | 0,997055816 | 0,806658679 | 1,103159659 | 1,017166584 | 1,294650061 |
| <i>Fgfr1op2</i>      | 0,969235713 | 0,804337971 | 1,171104795 | 0,980135651 | 1,255356144 |
| <i>Dot1l</i>         | 0,998838144 | 0,851985323 | 1,179170447 | 1,081324979 | 1,247875411 |
| <i>Gna12</i>         | 0,918341495 | 0,833716358 | 1,186859814 | 0,96264905  | 1,16371963  |
| <i>Agpat5</i>        | 1,003055985 | 0,936307491 | 1,044794418 | 1,029511619 | 1,123088836 |
| <i>Mmp14</i>         | 0,955146644 | 0,892227425 | 1,02278122  | 1,079602025 | 1,165913359 |
| <i>Rilpl1</i>        | 1,093688673 | 0,882566433 | 1,032193487 | 1,096111718 | 1,147834683 |
| <i>Car9</i>          | 1,111287282 | 0,869459756 | 1,005087284 | 1,081578475 | 1,112068409 |
| <i>Ddost</i>         | 1,099992237 | 0,867990242 | 0,912011706 | 1,052396295 | 1,263008934 |
| <i>4833417C18Rik</i> | 1,065909503 | 0,734487056 | 1,045665809 | 1,048390575 | 1,210420087 |
| <i>Kank3</i>         | 1,094667904 | 0,796654153 | 1,004845498 | 1,032049043 | 1,183194858 |
| <i>Dusp23</i>        | 1,025492854 | 0,739598783 | 1,020367739 | 1,033796428 | 1,112542501 |
| <i>Arrdc2</i>        | 1,072401323 | 0,680184451 | 1,003448396 | 1,050782567 | 1,102153518 |
| <i>Ndufs5</i>        | 1,169066235 | 0,730924719 | 1,06845965  | 1,119442677 | 1,094383172 |
| <i>Usp21</i>         | 1,291071853 | 0,828828667 | 0,861668452 | 0,98842078  | 1,019765204 |
| <i>2010011I20Rik</i> | 1,253031485 | 0,964863606 | 0,801216702 | 0,941702066 | 1,066107443 |
| <i>Rad9b</i>         | 1,172186174 | 0,943451688 | 0,898080825 | 0,974345448 | 1,120577765 |
| <i>1700001O22Rik</i> | 1,203795597 | 0,921188848 | 0,955415824 | 1,016683873 | 1,073427342 |
| <i>Ntn3</i>          | 1,37617929  | 0,944608803 | 0,855129581 | 1,026844383 | 1,221155643 |



|                      |             |             |             |             |             |
|----------------------|-------------|-------------|-------------|-------------|-------------|
| <i>BC022687</i>      | 1,299397715 | 0,924554629 | 0,895099653 | 1,076710732 | 1,242470133 |
| <i>A430105I19Rik</i> | 1,260016503 | 0,915734475 | 0,881845291 | 1,199796019 | 1,178541587 |
| <i>2310061I04Rik</i> | 1,208244738 | 0,829022591 | 0,895535066 | 1,198474605 | 1,232900903 |
| <i>Aldh3b1</i>       | 1,228950083 | 0,828142674 | 1,127368444 | 0,854686189 | 1,121304505 |
| <i>Tulp1</i>         | 1,174194857 | 0,897453178 | 1,046653543 | 0,846770635 | 1,080293168 |
| <i>Phf19</i>         | 1,274393572 | 0,904340056 | 1,049271735 | 0,863762319 | 1,137405541 |
| <i>Nrtn</i>          | 1,350047103 | 0,852880414 | 1,074864579 | 0,848252949 | 1,114594237 |
| <i>Scn4a</i>         | 1,189636445 | 0,929365529 | 0,921774939 | 0,864069091 | 1,058979385 |
| <i>Gsr</i>           | 1,258890484 | 0,919756935 | 0,970502509 | 0,773931936 | 1,114161429 |
| <i>Ttll12</i>        | 1,440340832 | 0,961493673 | 1,084618228 | 1,142661197 | 1,197607508 |
| <i>Tmem143</i>       | 1,407321013 | 1,015737989 | 1,115416431 | 1,055033292 | 1,218350809 |
| <i>Aurkb</i>         | 1,384302955 | 0,850327157 | 1,054389017 | 1,172300453 | 1,292664297 |
| <i>Acadm</i>         | 1,457807963 | 0,923510113 | 1,013047495 | 0,924365889 | 1,138990659 |
| <i>Mixl1</i>         | 1,4902749   | 0,90434846  | 1,017815416 | 1,06397017  | 1,102210543 |
| <i>Ccdc117</i>       | 1,53644581  | 0,855893052 | 1,12501202  | 0,972630778 | 1,188557732 |
| <i>Metrn</i>         | 1,471314242 | 1,085345958 | 1,041798194 | 0,899959967 | 1,283153774 |
| <i>2410001C21Rik</i> | 1,429845377 | 1,018942313 | 1,169655732 | 0,834198688 | 1,28433308  |
| <i>Tbc1d22a</i>      | 1,450318835 | 1,072025546 | 1,187826577 | 0,914426053 | 1,105204433 |
| <i>Palm</i>          | 1,441053921 | 1,02178474  | 1,121886568 | 0,936072057 | 1,092657866 |
| <i>Ccdc164</i>       | 1,487569445 | 0,934945949 | 1,224967659 | 0,9268632   | 1,272352622 |
| <i>Plin3</i>         | 1,491696176 | 0,974702594 | 1,246734209 | 1,050049411 | 1,29294017  |
| <i>Fes</i>           | 1,290107081 | 0,831775168 | 1,136337258 | 1,046351641 | 1,310758624 |
| <i>BC051628</i>      | 1,198855731 | 0,821957577 | 1,180209141 | 1,084659348 | 1,2489544   |
| <i>Ssrp1</i>         | 1,178466933 | 0,922669849 | 1,225511101 | 1,194182609 | 1,304734123 |
| <i>Mki67</i>         | 1,261955095 | 0,901842791 | 1,064321135 | 1,014136675 | 1,164180197 |
| <i>Adamts14</i>      | 1,248808415 | 0,840023131 | 1,143250191 | 1,129761607 | 1,129967319 |
| <i>C2</i>            | 1,186486384 | 0,97732662  | 1,182487905 | 1,037927309 | 1,098401843 |
| <i>Gm5148</i>        | 1,27205245  | 0,950470058 | 1,191418427 | 1,100150848 | 1,13839436  |
| <i>Map1lc3b</i>      | 1,254278858 | 1,081245125 | 1,164771401 | 1,094690066 | 1,33692034  |
| <i>D030056L22Rik</i> | 1,29782047  | 1,039463157 | 1,13756103  | 1,023708542 | 1,248065855 |
| <i>Cnga1</i>         | 1,127986037 | 1,100559516 | 1,154093751 | 1,050262878 | 1,216989503 |
| <i>Phf20</i>         | 1,096218662 | 1,059722958 | 1,22771249  | 1,030139281 | 1,192164357 |
| <i>Phc2</i>          | 1,171619968 | 1,086150836 | 1,245716919 | 1,04734826  | 1,260852006 |
| <i>P2ry12</i>        | 1,338803834 | 1,176796098 | 1,227144586 | 1,15410987  | 1,053954994 |
| <i>Tor3a</i>         | 1,297791446 | 1,132031439 | 1,164518929 | 1,091383211 | 1,148015868 |
| <i>Ptpra</i>         | 1,387043521 | 1,216078729 | 1,15232149  | 1,257721939 | 1,1063092   |
| <i>Taf1c</i>         | 1,452544791 | 1,132104674 | 1,145526835 | 1,258289857 | 1,282848537 |
| <i>E130306D19Rik</i> | 1,414780508 | 1,175353014 | 1,104759769 | 1,348379964 | 1,285397882 |
| <i>Mfrp</i>          | 1,145844337 | 0,883665726 | 1,099826115 | 1,470840272 | 1,218043358 |
| <i>C1qtnf5</i>       | 1,145844337 | 0,883665726 | 1,099826115 | 1,470840272 | 1,218043358 |
| <i>Hmgb2</i>         | 1,100003357 | 0,840003661 | 1,143984366 | 1,387818329 | 1,134318992 |
| <i>Scgb3a1</i>       | 1,340589129 | 0,958125605 | 1,115810437 | 1,420146767 | 0,98603589  |
| <i>Bambi-ps1</i>     | 1,65318688  | 0,910131249 | 0,884710415 | 1,418144212 | 1,116507432 |
| <i>Nudt8</i>         | 1,508826195 | 0,617355775 | 0,795257877 | 1,221997515 | 1,286786329 |
| <i>Ascl4</i>         | 1,473551838 | 0,794195062 | 0,664753082 | 1,11424498  | 0,908276978 |
| <i>Gstp2</i>         | 1,540868851 | 0,935153036 | 0,762363867 | 1,219383566 | 0,876052271 |
| <i>Ctsl</i>          | 1,020810431 | 0,853598312 | 0,87180217  | 0,826232804 | 0,837240583 |
| <i>Pif1</i>          | 1,04415434  | 0,935384582 | 0,897900579 | 0,850318841 | 0,919261055 |
| <i>Zfp280d</i>       | 1,077106527 | 0,903519284 | 0,811469899 | 0,737461483 | 0,834597189 |
| <i>Gm16515</i>       | 1,068351748 | 0,858440668 | 0,853409937 | 0,642783354 | 0,836925753 |
| <i>Arrb1</i>         | 1,058588502 | 0,679439225 | 0,902874996 | 0,722838689 | 1,038462257 |

|                      |             |             |             |             |             |
|----------------------|-------------|-------------|-------------|-------------|-------------|
| <i>Armcx3</i>        | 0,990205084 | 0,758330806 | 0,901639288 | 0,707380416 | 1,103412993 |
| <i>Rad23a</i>        | 0,969165037 | 0,716001368 | 0,918507482 | 0,80424933  | 1,020321989 |
| <i>Slc29a3</i>       | 0,983836978 | 0,850487181 | 0,962204349 | 0,780268886 | 1,026808135 |
| <i>Ubxn8</i>         | 0,969331761 | 0,793868014 | 0,9384575   | 0,793631352 | 1,055196972 |
| <i>Ccdc40</i>        | 1,030901501 | 0,803257083 | 0,911240778 | 0,839495624 | 0,969765307 |
| <i>Smarca4</i>       | 1,041013437 | 0,778963976 | 1,021938869 | 0,782132074 | 1,010418058 |
| <i>Ybx2</i>          | 0,848971629 | 0,833685802 | 1,024327518 | 0,745159086 | 0,78243207  |
| <i>Lrrc43</i>        | 0,827879072 | 0,827871204 | 1,019347491 | 0,650811897 | 0,821685112 |
| <i>Aldh4a1</i>       | 0,854153577 | 0,818741181 | 1,011126726 | 0,813727657 | 0,866068534 |
| <i>Best2</i>         | 1,019842069 | 0,812042379 | 1,031140356 | 0,669513889 | 0,82470136  |
| <i>Slc25a27</i>      | 1,012648707 | 0,801447588 | 0,929242822 | 0,692791706 | 0,737143043 |
| <i>Slc7a5</i>        | 1,003929484 | 0,748578581 | 0,924503991 | 0,768757994 | 0,856839717 |
| <i>Ubl5</i>          | 0,965547546 | 0,68588945  | 1,115448588 | 0,814814167 | 0,73984308  |
| <i>Gcnt3</i>         | 0,825638935 | 0,642819788 | 1,11332326  | 0,787949339 | 0,816275193 |
| <i>Ms4a4d</i>        | 1,007280164 | 0,80339442  | 1,113378586 | 0,885571274 | 0,830334264 |
| <i>1700008J07Rik</i> | 1,115441856 | 0,766776789 | 1,095547384 | 1,053875078 | 0,720348813 |
| <i>Neil1</i>         | 1,209729281 | 0,643841664 | 0,898567325 | 1,012117988 | 0,796512831 |
| <i>Sertad3</i>       | 1,104684582 | 0,551354675 | 0,898992438 | 0,937959207 | 0,890186162 |
| <i>Dtl</i>           | 1,282851057 | 0,985590669 | 0,888003891 | 0,762831597 | 0,751591905 |
| <i>Sdccag8</i>       | 1,266236528 | 0,956679692 | 0,827194623 | 0,772242642 | 0,764949511 |
| <i>Eef2k</i>         | 1,185524026 | 0,951421114 | 0,826408313 | 0,783332095 | 0,704671007 |
| <i>Ccdc63</i>        | 1,250977585 | 0,947304928 | 0,923676981 | 0,725809568 | 0,677185663 |
| <i>Rtn3</i>          | 1,26275833  | 0,915386179 | 0,884803684 | 0,788854464 | 0,877413994 |
| <i>Ptch2</i>         | 1,268013497 | 0,880490973 | 0,830876425 | 0,801978587 | 0,837322686 |
| <i>Necab3</i>        | 1,202851113 | 0,924658883 | 0,835121579 | 0,742170735 | 0,87283893  |
| <i>Macrod1</i>       | 1,265925188 | 0,792533003 | 0,974131679 | 0,718364187 | 0,814319945 |
| <i>Prps2</i>         | 1,262681037 | 0,766851104 | 0,987867833 | 0,792119325 | 0,749942443 |
| <i>Vps33b</i>        | 1,240500182 | 1,065396014 | 0,869273914 | 0,718193616 | 0,705828951 |
| <i>3830408C21Rik</i> | 1,240821633 | 1,05262708  | 0,907749231 | 0,653117477 | 0,801860597 |
| <i>Prkar2b</i>       | 1,144497079 | 0,952050451 | 0,852747147 | 0,65397373  | 0,761071866 |
| <i>1700027J07Rik</i> | 1,139859075 | 0,98520877  | 0,877218468 | 0,641646346 | 0,694903943 |
| <i>Cdan1</i>         | 1,276365854 | 0,917306826 | 0,929141744 | 0,620690431 | 0,761561334 |
| <i>Dhrs3</i>         | 1,29333173  | 0,977059543 | 0,921531735 | 0,633092575 | 0,70083759  |
| <i>Tmem235</i>       | 1,27417179  | 0,907845914 | 0,849348165 | 0,603433856 | 0,682587916 |
| <i>Zdhhc23</i>       | 1,144555762 | 0,877887306 | 0,884564391 | 0,844837439 | 0,639400829 |
| <i>Gm10653</i>       | 1,120867506 | 0,843501681 | 0,956916508 | 0,764521019 | 0,595935514 |
| <i>Ctdspl</i>        | 1,034378505 | 0,933920812 | 0,841428444 | 0,738164581 | 0,643725401 |
| <i>Ppp1r14a</i>      | 1,011951183 | 0,856979779 | 1,008406536 | 0,790084183 | 0,648465745 |
| <i>4933433C11Rik</i> | 1,189853132 | 0,708524594 | 0,832350638 | 0,493807961 | 0,761408148 |
| <i>Antxr1</i>        | 1,160917258 | 0,736665326 | 0,8395941   | 0,502044973 | 0,684882168 |
| <i>Lamc1</i>         | 1,234376324 | 0,856655713 | 0,859044125 | 0,463396762 | 0,664920127 |
| <i>Gm6498</i>        | 1,25710632  | 0,795683857 | 0,888612439 | 0,557428867 | 0,749799786 |
| <i>Sdc1</i>          | 1,277572655 | 0,765288703 | 1,002900651 | 0,513949405 | 0,746898446 |
| <i>Bahcc1</i>        | 1,261585189 | 0,636754453 | 0,773663664 | 0,606035437 | 0,73599214  |
| <i>Rhbdd3</i>        | 1,236069102 | 0,7185571   | 0,79566771  | 0,570093491 | 0,681294102 |
| <i>Pddc1</i>         | 1,174226393 | 0,665476994 | 0,820698233 | 0,577654752 | 0,789308805 |
| <i>1700027F09Rik</i> | 1,210969578 | 0,879951871 | 0,917497108 | 0,528727472 | 0,830515513 |
| <i>Ccdc85c</i>       | 1,239019891 | 0,821307679 | 0,93736011  | 0,599809092 | 0,941351321 |
| <i>Serf2</i>         | 0,734889277 | 0,717120833 | 1,000701221 | 0,708504333 | 0,590856445 |
| <i>Sgcb</i>          | 0,896509727 | 0,680395813 | 1,003782897 | 0,894724804 | 0,617406658 |
| <i>Repin1</i>        | 0,691683883 | 0,521364838 | 1,029803644 | 0,853203329 | 0,709903148 |

|                      |             |             |             |             |              |
|----------------------|-------------|-------------|-------------|-------------|--------------|
| <i>A230020J21Rik</i> | 1,042553599 | 0,631853131 | 1,056523328 | 0,874900485 | 0,398259761  |
| <i>1190007F08Rik</i> | 1,041882535 | 0,424843381 | 0,862003443 | 0,765744137 | 0,890070623  |
| <i>Fadd</i>          | 1,038618376 | 0,524421726 | 0,911684917 | 0,622426204 | 0,913986433  |
| <i>Cdk1</i>          | 1,035513827 | 0,435459092 | 0,85722005  | 0,482949678 | 0,745035981  |
| <i>Pnpla1</i>        | 1,041686879 | 0,693067235 | 0,827329295 | 0,681790131 | 0,669458201  |
| <i>4933407L21Rik</i> | 1,000066405 | 0,650400697 | 0,926028645 | 0,534417653 | 0,68263758   |
| <i>Asphd2</i>        | 1,131804379 | 0,559249854 | 0,998415872 | 0,714873449 | 0,638601987  |
| <i>Art5</i>          | 1,351661932 | 0,911401399 | 0,596319911 | 0,994013942 | 0,418534051  |
| <i>Mrps34</i>        | 1,294668939 | 0,978757602 | 0,540035904 | 1,061912952 | 0,555384717  |
| <i>Rhov</i>          | 1,210871274 | 0,477251128 | 0,626445865 | 1,020179621 | 0,376732963  |
| <i>Papss2</i>        | 1,327693691 | 0,970025978 | 0,80461957  | 0,492046375 | 0,669339727  |
| <i>Ppm1e</i>         | 1,338941642 | 1,062762933 | 0,769661918 | 0,558457905 | 0,680909105  |
| <i>Kmo</i>           | 1,371176074 | 0,932576865 | 0,810807469 | 0,522392069 | 0,519871834  |
| <i>Dpep2</i>         | 1,455657717 | 0,911475265 | 0,76152226  | 0,560344649 | 0,558987458  |
| <i>Tox2</i>          | 1,259945019 | 0,964323222 | 0,626223939 | 0,590862273 | 0,47442959   |
| <i>Pla2g12a</i>      | 1,117415375 | 0,861019933 | 0,744184131 | 0,689479097 | 0,694545002  |
| <i>Aldh16a1</i>      | 1,124956869 | 0,851407569 | 0,744143943 | 0,801978712 | 0,677118993  |
| <i>Glt8d2</i>        | 1,211535806 | 0,810375083 | 0,83082981  | 0,704766163 | 0,664485211  |
| <i>Erbp3</i>         | 1,087626487 | 0,789579789 | 0,647135196 | 0,743161594 | 0,727312803  |
| <i>Al661453</i>      | 1,127949763 | 0,779492741 | 0,647445206 | 0,628553932 | 0,683253399  |
| <i>Tle2</i>          | 1,260771314 | 0,917844115 | 0,743039528 | 0,643515782 | 0,812211352  |
| <i>E2f8</i>          | 1,211802418 | 0,836205514 | 0,789298901 | 0,669195154 | 0,816697242  |
| <i>Vars2</i>         | 1,317811112 | 0,928777142 | 0,663860064 | 0,681381403 | 0,77861486   |
| <i>Bambi</i>         | 1,176673619 | 0,77748566  | 0,678737555 | 0,773262494 | 0,391262124  |
| <i>Poll</i>          | 1,176055487 | 0,707231279 | 0,589249755 | 0,806703512 | 0,509438381  |
| <i>Wdr12</i>         | 1,316074118 | 0,691219149 | 0,699248977 | 0,749371883 | 0,580745361  |
| <i>Lonrf1</i>        | 1,259041329 | 0,776814369 | 0,73913316  | 0,711915305 | 0,580738361  |
| <i>Psap1</i>         | 1,234229997 | 0,671848134 | 0,753013111 | 0,659009007 | 0,597017092  |
| <i>Lrguk</i>         | 1,41163594  | 1,011010997 | 0,756063966 | 0,720818614 | 0,36604911   |
| <i>Gm4371</i>        | 1,308233699 | 0,878771855 | 0,849893285 | 0,737682434 | 0,293332949  |
| <i>Btrc</i>          | 1,010377339 | 0,857191017 | 0,731418059 | 0,664839856 | 0,530779613  |
| <i>Mpp4</i>          | 1,014154357 | 0,992860291 | 0,753313731 | 0,545912258 | 0,487683948  |
| <i>Slc38a11</i>      | 1,09886618  | 0,840463764 | 0,781479101 | 0,555347321 | 0,705438733  |
| <i>Vps13d</i>        | 1,137386648 | 0,848162851 | 0,738092818 | 0,589470824 | 0,641216451  |
| <i>Nhsl1</i>         | 1,137878634 | 0,844255043 | 0,84974727  | 0,588897853 | 0,675549596  |
| <i>Rpap2</i>         | 1,095968569 | 0,897601479 | 0,84878717  | 0,60009116  | 0,648445319  |
| <i>Tshb</i>          | 0,893186714 | 1,105347759 | 0,71857495  | 0,479088942 | 0,803481259  |
| <i>Dll4</i>          | 0,96566304  | 1,229370798 | 0,777530195 | 0,789591574 | 0,543561376  |
| <i>Scg3</i>          | 0,961908007 | 1,15971076  | 0,871513738 | 0,64675158  | 0,486074774  |
| <i>Dapk1</i>         | 1,191958825 | 1,076396202 | 0,818123314 | 0,79969295  | 0,608732472  |
| <i>5830403M04Rik</i> | 1,106381005 | 1,034786736 | 0,791420443 | 0,7532886   | 0,53542225   |
| <i>Sestd1</i>        | 1,233597262 | 1,036353753 | 0,760387511 | 0,724642428 | 0,509902736  |
| <i>1700040I03Rik</i> | 0,372443448 | 0,601346402 | 1,149869859 | 0,905191232 | 0,676303626  |
| <i>Prdx2</i>         | 0,500050107 | 0,774497856 | 1,010718589 | 0,935788183 | 0,660290916  |
| <i>H2-DMb2</i>       | 0,7747158   | 0,760117445 | 1,02408975  | 1,131594393 | 0,70078181   |
| <i>Asgr1</i>         | 0,56000478  | 0,673979689 | 1,02964979  | 1,192315599 | 0,716583064  |
| <i>Apof</i>          | 0,626166278 | 0,284277134 | 1,356140986 | 1,377509    | 0,727084051  |
| <i>G6b</i>           | 0,208389647 | 0,394846397 | 1,292511607 | 1,455733339 | 0,79255141   |
| <i>1700013G23Rik</i> | 0,88178809  | 0,539495816 | 1,307718474 | 1,334119282 | 0,438048617  |
| <i>Ctxn1</i>         | 0,908520533 | 0,65020164  | 1,223727559 | 1,203505596 | -0,198648369 |
| <i>Duoxa1</i>        | 0,293623868 | 1,281555827 | 1,231771205 | 0,725042432 | 0,94768904   |

|                      |             |             |             |             |             |
|----------------------|-------------|-------------|-------------|-------------|-------------|
| <i>1700063O14Rik</i> | 0,514118393 | 1,355557474 | 1,084751517 | 0,723225401 | 0,944365381 |
| <i>1700058G18Rik</i> | 0,625845982 | 1,148274043 | 1,22410655  | 0,583700678 | 0,941909872 |
| <i>Cd84</i>          | 0,458881586 | 1,135727301 | 0,953674221 | 0,942628087 | 1,067134824 |
| <i>0610037P05Rik</i> | 0,448151049 | 1,119170684 | 0,964785441 | 0,987585266 | 0,999769922 |
| <i>Crot</i>          | 0,487651406 | 1,178112994 | 1,051905804 | 0,974291113 | 1,045127741 |
| <i>Senp3</i>         | 0,524486629 | 1,143906676 | 1,072223992 | 1,018660131 | 1,080806921 |
| <i>Tpp1</i>          | 0,399504399 | 1,297441941 | 1,102087253 | 0,951270599 | 1,080403332 |
| <i>AI450353</i>      | 0,734528569 | 1,322877704 | 1,033498506 | 0,933625894 | 0,962838233 |
| <i>Calr4</i>         | 0,609093432 | 1,448349048 | 0,930555794 | 1,021801881 | 0,946538392 |
| <i>Cd83</i>          | 0,699173246 | 1,207173935 | 1,098046217 | 0,852157496 | 1,055021753 |
| <i>Rfxap</i>         | 0,584093121 | 1,199406387 | 1,16017592  | 0,837865948 | 1,000186536 |
| <i>Hnrnpa0</i>       | 0,650503488 | 1,081390319 | 1,196590009 | 0,955558703 | 1,062482195 |
| <i>Dynlrb1</i>       | 0,594275845 | 1,057160587 | 1,144252758 | 0,859369544 | 1,113655119 |
| <i>Rpl37a</i>        | 0,614513276 | 1,165898274 | 1,172302937 | 0,992955713 | 0,926010599 |
| <i>Chrna9</i>        | 0,660205086 | 1,25727126  | 1,317620286 | 0,953125381 | 0,985163836 |
| <i>Rsph3a</i>        | 0,646429328 | 1,063315492 | 1,123746863 | 0,715654017 | 1,074918948 |
| <i>Psmg4</i>         | 0,653013131 | 1,034444563 | 1,218846181 | 0,717765346 | 1,075756625 |
| <i>Syde2</i>         | 0,655588311 | 0,964265142 | 1,140934001 | 0,667519559 | 0,990479502 |
| <i>Eaf1</i>          | 0,700999765 | 1,008417998 | 1,304221833 | 0,771811849 | 1,047167412 |
| <i>Prss32</i>        | 0,758651946 | 1,084430933 | 1,15448106  | 0,843684667 | 0,892390787 |
| <i>Runx2</i>         | 0,723311061 | 1,02594789  | 1,013182847 | 0,790140122 | 1,041152422 |
| <i>Bzrap1</i>        | 0,697114336 | 0,960384692 | 1,009811393 | 0,832452927 | 1,070817916 |
| <i>Epb4.1l2</i>      | 0,771737909 | 0,972131274 | 1,038884956 | 0,821514776 | 0,942786995 |
| <i>2310044G17Rik</i> | 0,762670723 | 0,911163424 | 1,094103505 | 0,775218562 | 1,064081095 |
| <i>Trim47</i>        | 0,792900321 | 0,981248812 | 1,121577615 | 0,78174431  | 1,063891633 |
| <i>Rsph3b</i>        | 0,778217657 | 0,966993217 | 1,085927056 | 0,719463431 | 1,009872399 |
| <i>Itпка</i>         | 0,633593415 | 1,060215831 | 0,985842688 | 0,746220683 | 0,815621757 |
| <i>Gprc5b</i>        | 0,502448911 | 0,934701671 | 1,046446373 | 0,820733261 | 0,814541983 |
| <i>Lad1</i>          | 0,603917743 | 0,981975089 | 1,226247114 | 0,731105023 | 0,760119697 |
| <i>Lztf1l</i>        | 0,612126269 | 1,205097684 | 1,002910205 | 0,751776299 | 0,616802404 |
| <i>2010310C07Rik</i> | 0,573745832 | 1,017544284 | 0,91564082  | 0,66817338  | 0,604549024 |
| <i>Hap1</i>          | 0,759192162 | 1,022615755 | 0,829302004 | 0,696141439 | 0,848087793 |
| <i>Astl</i>          | 0,602235458 | 1,015533741 | 0,798331629 | 0,76350709  | 0,896362502 |
| <i>BB283400</i>      | 0,673730901 | 1,131039042 | 0,807774225 | 0,78386402  | 0,759817591 |
| <i>Cmya5</i>         | 0,785149394 | 1,07364249  | 0,865585782 | 0,808193013 | 0,734673156 |
| <i>Ptpn18</i>        | 0,585321762 | 1,049439947 | 0,928278009 | 0,988129742 | 0,879066131 |
| <i>Baz2b</i>         | 0,663521046 | 1,011246226 | 0,904236548 | 0,954693359 | 0,874939835 |
| <i>Prkca</i>         | 0,668132513 | 1,057657944 | 0,996750067 | 0,965016941 | 0,964868459 |
| <i>Camk1d</i>        | 0,713999551 | 1,082400607 | 0,956538773 | 0,94055052  | 0,912811611 |
| <i>Mfsd4</i>         | 0,377941381 | 1,153266946 | 0,894406664 | 0,996105138 | 0,828097184 |
| <i>Tacc2</i>         | 0,367417062 | 1,189036008 | 0,878516074 | 0,921464387 | 0,761348037 |
| <i>Rbm45</i>         | 0,353941508 | 1,115102452 | 0,7813285   | 0,921051433 | 0,807250838 |
| <i>Pex7</i>          | 0,527410334 | 1,086954906 | 0,841264836 | 0,925461803 | 0,689530739 |
| <i>1700063D05Rik</i> | 0,558872138 | 1,010090145 | 0,890479493 | 0,915375784 | 0,708966986 |
| <i>Mdfic</i>         | 0,437351672 | 1,039812108 | 0,894665818 | 0,739234012 | 0,740294232 |
| <i>Armxc2</i>        | 0,307250729 | 1,089915852 | 0,970664987 | 0,71102719  | 0,84505521  |
| <i>Secisbp2l</i>     | 0,812265134 | 1,032027893 | 0,875746672 | 0,984920701 | 0,854912966 |
| <i>Dtnbp1</i>        | 0,825562068 | 1,006701139 | 0,927671068 | 0,947512269 | 0,888999121 |
| <i>Micu1</i>         | 0,77405559  | 1,011309533 | 0,90016702  | 0,919949821 | 0,81888167  |
| <i>Ubr7</i>          | 0,840466471 | 1,077843717 | 0,94354248  | 0,939752459 | 0,857730787 |
| <i>Cyp2d22</i>       | 0,783755507 | 0,984530189 | 0,96692824  | 1,053669829 | 0,904756967 |

|                      |             |             |             |             |             |
|----------------------|-------------|-------------|-------------|-------------|-------------|
| <i>Vegfb</i>         | 0,929396222 | 0,988551363 | 0,859740337 | 1,090539669 | 0,803712457 |
| <i>Foxh1</i>         | 0,938303206 | 1,050435221 | 0,925784566 | 1,01873825  | 0,773109593 |
| <i>Kcnj9</i>         | 0,707177032 | 1,188067098 | 0,751333986 | 1,083354053 | 0,78005054  |
| <i>Sys1</i>          | 0,762570788 | 1,058669461 | 0,778757536 | 1,147474794 | 0,752937082 |
| <i>Lysmd2</i>        | 0,847431879 | 1,182335858 | 1,071065747 | 0,944848647 | 0,816987489 |
| <i>Tm2d3</i>         | 0,779784883 | 1,145637242 | 1,095149106 | 0,982097668 | 0,864192106 |
| <i>Neu4</i>          | 0,714518991 | 1,243907239 | 1,112626987 | 1,041585049 | 0,732761563 |
| <i>Ier5</i>          | 0,776937509 | 1,031918567 | 1,064750363 | 1,049007124 | 0,636377189 |
| <i>Pik3c2b</i>       | 0,70005279  | 1,049257202 | 1,021864066 | 0,980215624 | 0,773557746 |
| <i>Bod1</i>          | 0,506228784 | 1,007007673 | 0,965202549 | 1,182243818 | 0,670942814 |
| <i>Dclre1a</i>       | 0,372478456 | 0,906609586 | 0,923565097 | 1,20909826  | 0,81960081  |
| <i>Arhgap31</i>      | 0,548552244 | 0,97752516  | 0,892771714 | 1,089717783 | 0,770666929 |
| <i>2610021K21Rik</i> | 0,454505469 | 0,950516906 | 0,866305231 | 1,016831472 | 0,773784417 |
| <i>Gng12</i>         | 0,465235973 | 1,079300363 | 0,868956866 | 1,017759685 | 0,803956596 |
| <i>2400001E08Rik</i> | 0,429336486 | 1,117501943 | 0,852339109 | 1,120127824 | 0,841217183 |
| <i>Gm7616</i>        | 0,518827716 | 1,026669204 | 1,198712328 | 1,143166752 | 0,677840206 |
| <i>Prnd</i>          | 0,449089476 | 1,105873563 | 1,160890545 | 1,242653998 | 0,654035251 |
| <i>Cd40lg</i>        | 0,463756439 | 1,762833762 | 1,234602713 | 0,65748781  | 0,904301757 |
| <i>A630066F11Rik</i> | 0,44033473  | 1,434578985 | 1,062027684 | 0,553062676 | 0,670760592 |
| <i>Shc1</i>          | 0,666947827 | 1,133582967 | 0,645300463 | 0,956168261 | 1,110594626 |
| <i>Tmod4</i>         | 0,756016506 | 1,132765091 | 0,560530688 | 0,902544724 | 0,999655508 |
| <i>Ly6a</i>          | 0,773542702 | 1,328927338 | 0,616632625 | 1,029966548 | 0,964814685 |
| <i>Tmem95</i>        | 0,887998346 | 1,022335857 | 0,479449915 | 0,755266378 | 1,076578012 |
| <i>Hspa1a</i>        | 0,923726743 | 1,075112011 | 0,4319303   | 0,709118419 | 0,960029839 |
| <i>Gm17769</i>       | 1,047267079 | 1,141773589 | 0,60390635  | 0,669392723 | 1,059336545 |
| <i>Lass1</i>         | 0,855201167 | 1,010323562 | 0,855614589 | 0,835473771 | 1,241356543 |
| <i>Gdf1</i>          | 0,855197015 | 1,010324215 | 0,856434441 | 0,835471939 | 1,241354882 |
| <i>Tmem91</i>        | 0,822312657 | 1,015604446 | 0,858870498 | 0,841716832 | 1,229150408 |
| <i>Tst</i>           | 0,884618171 | 1,0110439   | 0,929452669 | 0,779199544 | 1,206696777 |
| <i>Gm9776</i>        | 0,851725718 | 1,105363068 | 0,910786636 | 0,667145821 | 1,211490884 |
| <i>Snhg7</i>         | 0,876956661 | 1,131287857 | 0,702203715 | 0,829912125 | 1,288330187 |
| <i>Lxn</i>           | 0,940524161 | 1,236020934 | 0,815546566 | 0,837837695 | 1,243301618 |
| <i>4933439C10Rik</i> | 1,145206701 | 1,29923678  | 0,905530608 | 0,760180172 | 1,052832781 |
| <i>Msl3l2</i>        | 1,141958066 | 1,244760663 | 0,801504222 | 0,810617322 | 1,196160532 |
| <i>Abtb1</i>         | 1,0876957   | 1,097118327 | 0,873413023 | 0,77045793  | 1,141152479 |
| <i>Ccdc142</i>       | 0,968679129 | 1,152970613 | 0,78148259  | 0,819888035 | 1,071126994 |
| <i>Smo</i>           | 0,789651555 | 1,067305801 | 0,79280556  | 0,889831657 | 0,547767274 |
| <i>Slc22a17</i>      | 0,735631546 | 1,046113644 | 0,837156277 | 0,916657897 | 0,588882415 |
| <i>Swap70</i>        | 0,677493914 | 1,151528768 | 0,779959516 | 0,941367036 | 0,620559184 |
| <i>Hbegf</i>         | 0,681076974 | 1,214840716 | 0,613330644 | 0,981283967 | 0,495179918 |
| <i>Cxcr1</i>         | 0,776412483 | 1,107774621 | 0,677247701 | 0,996358787 | 0,462996607 |
| <i>Vgf</i>           | 0,754642694 | 1,365301803 | 0,660964648 | 0,679852516 | 0,499055818 |
| <i>Etv5</i>          | 0,741876581 | 1,341415289 | 0,843910371 | 1,048454829 | 0,602458757 |
| <i>4921515J06Rik</i> | 0,792245792 | 1,353547713 | 0,887119514 | 1,001561775 | 0,614231393 |
| <i>4921511I17Rik</i> | 0,848610121 | 1,184308901 | 0,829404598 | 1,056897574 | 0,651265415 |
| <i>Hpn</i>           | 0,869368004 | 1,470422407 | 0,883488829 | 0,97755079  | 0,73907263  |
| <i>Trp53inp2</i>     | 0,959622444 | 0,932744256 | 1,223470135 | 0,581675842 | 0,972478589 |
| <i>Gm19434</i>       | 1,117649521 | 0,831156274 | 1,18958639  | 0,658777648 | 1,014542528 |
| <i>Nxt1</i>          | 1,013170343 | 0,894071677 | 1,312841916 | 0,741446356 | 0,858591621 |
| <i>Cbx2</i>          | 0,995214747 | 0,907600288 | 1,375967427 | 0,717515107 | 0,979846636 |
| <i>Zdhhc19</i>       | 1,027693885 | 1,014841842 | 1,082323537 | 0,642194483 | 0,762847219 |

|                      |             |             |             |             |             |
|----------------------|-------------|-------------|-------------|-------------|-------------|
| <i>Tsen2</i>         | 0,969999994 | 0,926766844 | 1,046507854 | 0,625409957 | 0,881192639 |
| <i>Utp14b</i>        | 0,96639291  | 0,969647184 | 1,159405473 | 0,752336793 | 0,851943572 |
| <i>Pcgf1</i>         | 0,925361161 | 0,918559214 | 1,211255003 | 0,701909335 | 0,823996478 |
| <i>Mettl6</i>        | 0,994308389 | 0,906733983 | 1,175518256 | 0,577937645 | 0,725526528 |
| <i>Mafb</i>          | 1,163797036 | 1,183673199 | 1,423762551 | 0,549876605 | 0,737174081 |
| <i>Ttc30a1</i>       | 1,055487024 | 1,17599472  | 1,488059651 | 0,731504231 | 0,925934624 |
| <i>Camkk1</i>        | 1,138664699 | 0,999564688 | 0,929851107 | 0,572937799 | 0,96842364  |
| <i>Gm12409</i>       | 1,095781354 | 1,073979936 | 0,936614688 | 0,693855381 | 1,020065432 |
| <i>Mthfd1l</i>       | 1,13142049  | 0,912707937 | 1,05079815  | 0,719437503 | 1,048900833 |
| <i>Igf2bp2</i>       | 1,143721643 | 0,870688893 | 0,974267773 | 0,685038237 | 0,948385264 |
| <i>1300002E11Rik</i> | 1,192298986 | 1,132042332 | 1,034582465 | 0,563840149 | 0,932499043 |
| <i>Cchcr1</i>        | 1,202969029 | 1,053557801 | 1,15639195  | 0,576166939 | 0,781104243 |
| <i>5430411K18Rik</i> | 1,249683187 | 0,956410575 | 0,947421867 | 0,763574435 | 0,861429488 |
| <i>Zfp746</i>        | 1,214852607 | 0,926123925 | 0,950043858 | 0,826477717 | 0,853769079 |
| <i>Sipa1l3</i>       | 1,268154287 | 1,007240342 | 0,96797863  | 0,815924424 | 0,841428299 |
| <i>Ept1</i>          | 1,238785653 | 1,003135977 | 1,001420423 | 0,759834375 | 0,936062003 |
| <i>Syk</i>           | 1,207972915 | 1,019391703 | 1,022333518 | 0,76455588  | 0,891306405 |
| <i>Tnfrsf8</i>       | 1,144419688 | 0,963142206 | 0,970286593 | 0,768329318 | 0,772758769 |
| <i>Tspan2</i>        | 1,176617878 | 0,923689161 | 1,025486746 | 0,751801819 | 0,784744936 |
| <i>Zbed4</i>         | 1,128651063 | 0,910326376 | 0,944071051 | 0,797655851 | 0,858978313 |
| <i>Pafah2</i>        | 1,142054947 | 1,064119494 | 0,968603645 | 0,758941353 | 0,840527146 |
| <i>Slc44a3</i>       | 1,18874233  | 1,078547593 | 0,967625835 | 0,71722638  | 0,792643497 |
| <i>Ergic1</i>        | 1,025968371 | 1,087883002 | 1,003249024 | 0,842299969 | 0,89246587  |
| <i>S1pr2</i>         | 1,084502003 | 1,015178112 | 0,964103615 | 0,854952173 | 0,880984523 |
| <i>Amhr2</i>         | 1,064086365 | 1,075098395 | 1,087852942 | 0,765880269 | 0,902709128 |
| <i>Eij2b4</i>        | 1,120885657 | 0,970561096 | 1,089857049 | 0,901370918 | 0,892289892 |
| <i>C330011F03</i>    | 0,875844526 | 1,184976444 | 0,95750102  | 0,741470378 | 1,003228189 |
| <i>1600002K03Rik</i> | 0,759283672 | 1,212052766 | 1,052777692 | 0,680333201 | 0,896298618 |
| <i>BC025920</i>      | 0,941703072 | 1,247876657 | 1,162820325 | 0,756959535 | 0,865339142 |
| <i>Galr3</i>         | 0,894729283 | 1,269438979 | 0,952684373 | 0,443607269 | 0,902022585 |
| <i>Rab13</i>         | 0,923241201 | 1,219324531 | 1,001921253 | 0,585945669 | 0,802523936 |
| <i>1700102H20Rik</i> | 0,849242493 | 1,260199897 | 0,942304083 | 0,574186681 | 0,896435676 |
| <i>Krtcap2</i>       | 0,897692365 | 1,275081425 | 0,989964368 | 0,616461868 | 0,998339864 |
| <i>Dnlz</i>          | 1,133102924 | 1,394427657 | 1,065034067 | 0,434495085 | 1,139118513 |
| <i>Prnt1</i>         | 1,086435918 | 1,038861698 | 0,876597903 | 0,274648841 | 0,670217933 |
| <i>Tmem106c</i>      | 1,102310217 | 1,061900882 | 1,061749243 | 0,341918445 | 0,507334842 |
| <i>Arhgap20</i>      | 0,875532441 | 0,915683385 | 1,019913532 | 0,393339553 | 0,523809556 |
| <i>Sh2d5</i>         | 1,035166582 | 0,623216365 | 0,983339821 | 0,466533677 | 0,848067554 |
| <i>Fgf8</i>          | 1,059202332 | 0,799240375 | 1,000038531 | 0,526688527 | 0,883537717 |
| <i>Use1</i>          | 1,091931063 | 0,635589135 | 1,207627877 | 0,351040654 | 0,809350056 |
| <i>Abca2</i>         | 0,995049503 | 0,655770523 | 0,839688598 | 0,721476071 | 1,274112483 |
| <i>1110038B12Rik</i> | 0,850156153 | 0,688456393 | 0,775094024 | 0,676387656 | 1,286279725 |
| <i>Tmem147</i>       | 0,928403804 | 0,496208179 | 0,625780842 | 0,696507484 | 1,266278665 |
| <i>Nhlrc4</i>        | 0,846585051 | 0,554763828 | 0,662264986 | 0,744192638 | 1,250679328 |
| <i>Fam173a</i>       | 0,961588601 | 0,454774014 | 0,628495537 | 0,57270285  | 1,438557288 |
| <i>Lrrc10</i>        | 1,065724048 | 0,60896835  | 0,64849955  | 0,704161016 | 1,416050857 |
| <i>Pycr1</i>         | 0,926425577 | 0,349407192 | 0,833999486 | 0,679954413 | 1,289384116 |
| <i>Zfp747</i>        | 1,12112912  | 0,216221669 | 0,8260189   | 0,587541872 | 1,400082743 |
| <i>Pdcd5</i>         | 0,586520718 | 0,498979754 | 0,882651265 | 0,623852314 | 1,136275665 |
| <i>A230050P20Rik</i> | 0,600401596 | 0,439904314 | 0,852468903 | 0,540983886 | 1,254604543 |
| <i>Timm8a1</i>       | 0,478622066 | 0,540588757 | 0,895497423 | 0,495481279 | 1,164745836 |

|                      |             |             |             |             |             |
|----------------------|-------------|-------------|-------------|-------------|-------------|
| <i>Tmem198b</i>      | 0,678094761 | 0,501411155 | 0,907874953 | 0,44677073  | 1,011424889 |
| <i>Efcab4b</i>       | 0,644901393 | 0,432441378 | 0,853829024 | 0,371223768 | 1,12996251  |
| <i>Plekhj1</i>       | 0,687890455 | 0,309852595 | 1,036887435 | 0,625292778 | 1,137055143 |
| <i>4930465K10Rik</i> | 0,718607916 | 0,342938379 | 0,856208899 | 0,781634345 | 1,133978621 |
| <i>Tysnd1</i>        | 0,774588014 | 0,382421659 | 0,684992109 | 0,345679571 | 1,15984548  |
| <i>Mars2</i>         | 0,848440444 | 0,403971251 | 0,664373315 | 0,317356764 | 1,160558441 |
| <i>Neurl2</i>        | 0,911624105 | 0,386814956 | 0,935186964 | 0,401100155 | 1,168564463 |
| <i>Tlr9</i>          | 0,640943505 | 0,368164075 | 0,824900392 | 0,319706183 | 1,29999027  |
| <i>Gm5475</i>        | 0,799704571 | 0,656260967 | 0,642867122 | 0,491752945 | 1,146985442 |
| <i>Ankrd13d</i>      | 0,833014116 | 0,579031303 | 0,659775283 | 0,618580264 | 1,197781296 |
| <i>Cenpm</i>         | 0,867594409 | 0,599577539 | 0,656435857 | 0,52732131  | 1,004172081 |
| <i>Tas1r3</i>        | 0,903949023 | 0,561580598 | 0,73668001  | 0,583315313 | 1,031129085 |
| <i>Galns</i>         | 0,798661965 | 0,617254394 | 0,830886707 | 0,517205609 | 1,118077271 |
| <i>Bace1</i>         | 0,759722983 | 0,548777172 | 0,758128132 | 0,389055657 | 1,109025832 |
| <i>H2afy3</i>        | 0,705950249 | 0,7609622   | 0,757289108 | 0,459397761 | 1,130684501 |
| <i>Gba</i>           | 0,782846166 | 0,751468512 | 0,588536534 | 0,543049026 | 1,036491853 |
| <i>Pycl</i>          | 0,741895031 | 0,400707803 | 0,74802003  | 0,687118202 | 1,083896979 |
| <i>Rfx2</i>          | 0,745897904 | 0,421274644 | 0,678506995 | 0,589165574 | 1,010833705 |
| <i>C230052I12Rik</i> | 0,770257633 | 0,542736798 | 0,767838345 | 0,650274592 | 1,076760923 |
| <i>Ipo4</i>          | 0,690017025 | 0,491066436 | 0,565984875 | 0,682363376 | 1,045059677 |
| <i>Kcnh6</i>         | 0,691445313 | 0,49707882  | 0,654476829 | 0,616213882 | 1,133296848 |
| <i>Cdc14b</i>        | 0,625605745 | 0,506668894 | 0,68395657  | 0,741134706 | 1,109806714 |
| <i>Tsta3</i>         | 0,619881871 | 0,497912687 | 0,656066017 | 0,654514767 | 1,076393168 |
| <i>Odc1</i>          | 0,549258824 | 0,634731206 | 0,499259719 | 0,464856022 | 1,195144996 |
| <i>Klf11</i>         | 0,643695201 | 0,622566634 | 0,53125897  | 0,576465599 | 1,213606246 |
| <i>3110056O03Rik</i> | 0,748814393 | 0,539412344 | 0,502260491 | 0,414104284 | 1,010137457 |
| <i>Tspo2</i>         | 1,04717324  | 0,696691266 | 0,405414646 | 0,552632816 | 1,105186855 |
| <i>5430437P03Rik</i> | 0,944962504 | 0,650393945 | 0,518090043 | 0,677482269 | 1,021320584 |
| <i>Tmem30b</i>       | 0,998142146 | 0,674150378 | 0,292126953 | 0,745639482 | 1,143666148 |
| <i>Lefty1</i>        | 0,916250007 | 0,529757253 | 0,494780575 | 0,528029652 | 1,258371633 |
| <i>Cdc20</i>         | 0,88780531  | 0,406205755 | 0,314482287 | 0,633980047 | 1,142543322 |
| <i>Alad</i>          | 0,904863352 | 0,907741918 | 1,081515603 | 0,803984912 | 1,139907912 |
| <i>2410131K14Rik</i> | 0,915651605 | 0,946728125 | 1,043467148 | 0,796452974 | 1,146011339 |
| <i>Foxr1</i>         | 0,902720751 | 0,932395011 | 1,034400175 | 0,758356061 | 1,094129629 |
| <i>Cdk6</i>          | 0,99148478  | 0,897187143 | 1,06036491  | 0,738373464 | 1,061529737 |
| <i>Acox1</i>         | 0,965489786 | 0,929695248 | 1,035967681 | 0,683959478 | 1,049281681 |
| <i>Arl3</i>          | 0,987671194 | 1,033223272 | 1,078604562 | 0,673565475 | 1,163794622 |
| <i>Dmwd</i>          | 0,944276603 | 0,868902794 | 1,052800782 | 0,626100778 | 1,201377651 |
| <i>Plekhg3</i>       | 0,944044474 | 0,807263206 | 1,050774529 | 0,684565764 | 1,241005863 |
| <i>Hgsnat</i>        | 0,89704524  | 0,819846247 | 1,150453433 | 0,660395432 | 1,104059708 |
| <i>Kif20a</i>        | 0,881681448 | 1,028592428 | 0,913519209 | 0,803764299 | 1,077860107 |
| <i>Mrps11</i>        | 0,894838826 | 1,04273871  | 0,947952736 | 0,764722345 | 1,021075869 |
| <i>Slc39a13</i>      | 0,848293854 | 0,970029702 | 0,988580664 | 0,815953726 | 1,034201445 |
| <i>Hemgn</i>         | 0,806091581 | 1,017763923 | 0,993883732 | 0,771337881 | 1,040448014 |
| <i>Phgdh</i>         | 0,83980605  | 1,006607655 | 0,854638616 | 0,784501192 | 1,059297196 |
| <i>Srcrb4d</i>       | 0,870519166 | 0,952015029 | 0,943825401 | 0,67831326  | 1,121644036 |
| <i>Tcp11</i>         | 0,982566337 | 1,029420796 | 0,942649994 | 0,704371695 | 0,96254373  |
| <i>Jub</i>           | 0,936787272 | 1,085415773 | 0,979947982 | 0,635172716 | 0,980569631 |
| <i>Pip4k2c</i>       | 0,819842827 | 0,751312171 | 0,831146653 | 0,64252891  | 1,144122051 |
| <i>Sirt4</i>         | 0,843489557 | 0,804351823 | 0,771467208 | 0,637813175 | 1,179334292 |
| <i>C8g</i>           | 0,797758219 | 0,891058123 | 0,784157292 | 0,651497531 | 1,165114472 |

|                      |             |             |             |             |             |
|----------------------|-------------|-------------|-------------|-------------|-------------|
| <i>Tssk1</i>         | 0,703182034 | 0,804230233 | 0,840229365 | 0,574349319 | 1,288165243 |
| <i>9130019O22Rik</i> | 0,96614408  | 0,857838052 | 0,81692403  | 0,650560891 | 1,32838706  |
| <i>Stac3</i>         | 0,92757273  | 0,903826645 | 0,855870252 | 0,485110982 | 1,29276447  |
| <i>Ccdc96</i>        | 0,914720839 | 0,606226009 | 0,941711115 | 0,672209899 | 1,124511367 |
| <i>Tlr2</i>          | 0,898723001 | 0,574860625 | 0,999103405 | 0,64359492  | 1,159230699 |
| <i>Slc16a13</i>      | 0,857762738 | 0,534267005 | 0,91783353  | 0,612070429 | 1,095592988 |
| <i>Atp2a1</i>        | 0,908855622 | 0,693238816 | 1,036267008 | 0,462782862 | 1,063217753 |
| <i>Scyl1</i>         | 0,839379536 | 0,775375126 | 0,86975829  | 0,641897418 | 1,044877487 |
| <i>Tarbp2</i>        | 0,786517425 | 0,751622616 | 0,987538022 | 0,591349224 | 1,105426368 |
| <i>Rogdi</i>         | 1,124308496 | 0,5854136   | 0,896233839 | 0,535196091 | 1,105105292 |
| <i>Rps6kl1</i>       | 1,148226128 | 0,789234073 | 0,909336098 | 0,483669569 | 1,101758597 |
| <i>Tubg1</i>         | 1,042389552 | 0,710922295 | 0,758198524 | 0,46690968  | 1,189012642 |
| <i>Fbxl15</i>        | 1,11285231  | 0,794498697 | 1,02151184  | 0,694174007 | 1,362292385 |
| <i>Mrpl38</i>        | 1,005596128 | 0,65846637  | 1,009359117 | 0,579205307 | 1,43647193  |
| <i>Ncapd2</i>        | 0,926563817 | 0,700846005 | 1,006680385 | 0,747623893 | 1,297101564 |
| <i>Flii</i>          | 0,880286571 | 0,708835185 | 1,009766018 | 0,812392345 | 1,242703596 |
| <i>Ninj1</i>         | 0,948773481 | 0,652832772 | 0,929672111 | 0,846446438 | 1,273368521 |
| <i>Ccdc94</i>        | 0,691913222 | 0,80552151  | 0,782236283 | 0,800232424 | 1,260275    |
| <i>Ccdc61</i>        | 0,732644315 | 0,717971184 | 0,832124828 | 0,729921059 | 1,209138255 |
| <i>Zdhhc24</i>       | 0,70004121  | 0,620653788 | 0,855029508 | 0,903638403 | 1,322115654 |
| <i>Soat2</i>         | 0,716569054 | 0,668070204 | 0,822514856 | 0,835449264 | 1,277689913 |
| <i>Zfp12</i>         | 0,626159828 | 0,634174554 | 0,909196905 | 0,79099675  | 1,225765118 |
| <i>Llgl2</i>         | 0,648961279 | 0,689331144 | 0,933654882 | 0,84220198  | 1,260804506 |
| <i>Polr3h</i>        | 0,673292989 | 0,652178812 | 1,013943065 | 0,785566609 | 1,196250107 |
| <i>Mrpl19</i>        | 0,65976225  | 0,532139172 | 0,733094754 | 0,862394025 | 1,187160362 |
| <i>Lrwd1</i>         | 0,746086521 | 0,483836122 | 0,757563877 | 0,773006194 | 1,286446664 |
| <i>Limk1</i>         | 0,596949091 | 0,599996515 | 0,817436071 | 0,747570621 | 1,199637414 |
| <i>Pabpc4</i>        | 0,583333385 | 0,586465028 | 0,733610956 | 0,739969792 | 1,26844678  |
| <i>4921530D09Rik</i> | 0,767832086 | 0,649506245 | 0,817582212 | 0,901989883 | 1,214303709 |
| <i>Gpd1l</i>         | 0,713526651 | 0,690041963 | 0,858503327 | 0,885360404 | 1,138828624 |
| <i>Ell</i>           | 0,870914578 | 0,735210562 | 0,930859878 | 0,872348601 | 1,144967938 |
| <i>Kdelr1</i>        | 0,827435813 | 0,674661581 | 0,897022688 | 0,858831512 | 1,073751289 |
| <i>Fam132b</i>       | 0,883131573 | 0,639223584 | 0,845118328 | 0,888388684 | 1,166801784 |
| <i>Sepr1</i>         | 0,886716137 | 0,620343182 | 0,810567124 | 0,836068747 | 1,188280866 |
| <i>Zbtb42</i>        | 0,92902268  | 0,691236343 | 0,816629632 | 0,852121448 | 1,232988141 |
| <i>C530028O21Rik</i> | 0,816331798 | 0,846657619 | 0,806680586 | 0,871322681 | 1,294215057 |
| <i>2410004P03Rik</i> | 0,801797403 | 0,827496284 | 0,83468634  | 0,892973181 | 1,315367658 |
| <i>Klhl36</i>        | 0,861468799 | 0,82379967  | 0,758464214 | 0,811577442 | 1,25792083  |
| <i>Coasy</i>         | 0,828064456 | 0,751882895 | 0,706584839 | 0,990328876 | 1,289111081 |
| <i>3110002H16Rik</i> | 0,672837576 | 0,658089274 | 0,819844552 | 0,804107204 | 1,06145979  |
| <i>Rtcd1</i>         | 0,645943012 | 0,67281496  | 0,772226569 | 0,838164207 | 1,003878039 |
| <i>Flcn</i>          | 0,541351724 | 0,736643605 | 0,701203128 | 0,755661422 | 1,022550149 |
| <i>Gusb</i>          | 0,529409462 | 0,704807897 | 0,69039453  | 0,760999703 | 1,00378097  |
| <i>Inpp5e</i>        | 0,691072259 | 0,633032346 | 0,603117574 | 0,842313764 | 1,058403478 |
| <i>Stoml2</i>        | 0,604312781 | 0,667760688 | 0,666055781 | 0,909351738 | 1,072175468 |
| <i>Nomo1</i>         | 0,793413006 | 0,650616588 | 0,695747639 | 0,698665714 | 1,0032416   |
| <i>Sars2</i>         | 0,744941417 | 0,614819865 | 0,741631086 | 0,730018177 | 1,006553036 |
| <i>5031425F14Rik</i> | 0,781670675 | 0,700829523 | 0,776133211 | 0,749585999 | 1,006399114 |
| <i>1110021J02Rik</i> | 0,876884575 | 0,639307011 | 0,778504    | 0,729208958 | 1,037279599 |
| <i>Triap1</i>        | 1,014160886 | 0,697423124 | 0,783846915 | 0,626188324 | 1,074657863 |
| <i>Apitd1</i>        | 0,972322664 | 0,647175974 | 0,763874197 | 0,645006668 | 1,023793064 |



|                      |             |             |             |             |             |
|----------------------|-------------|-------------|-------------|-------------|-------------|
| <i>Prkcd</i>         | 0,881203008 | 0,811180376 | 0,853949678 | 0,788343757 | 1,007678035 |
| <i>Gns</i>           | 0,933413818 | 0,848584306 | 0,857413843 | 0,842196027 | 1,048467036 |
| <i>Ankrd24</i>       | 0,853377799 | 0,832366714 | 0,718228079 | 0,802840755 | 1,042032791 |
| <i>Plcb3</i>         | 0,887059864 | 0,923897939 | 0,736833783 | 0,881092065 | 1,06997778  |
| <i>Tmx2</i>          | 0,841464761 | 0,883039363 | 0,713576175 | 0,884392996 | 1,154626911 |
| <i>Tmem41a</i>       | 0,913601726 | 0,871333058 | 0,807684308 | 0,923516427 | 1,162584078 |
| <i>P2ry13</i>        | 0,881523754 | 0,980466265 | 0,698312823 | 0,700458619 | 1,029977851 |
| <i>Lmnb2</i>         | 1,002319121 | 0,835938396 | 0,656847028 | 0,795743752 | 0,954587998 |
| <i>Zfand2b</i>       | 0,59421551  | 0,7686231   | 1,300732583 | 0,839927661 | 0,96914226  |
| <i>Celf5</i>         | 0,536833373 | 0,841272424 | 1,303128497 | 0,807269065 | 1,149009763 |
| <i>Hspbp1</i>        | 0,660174164 | 0,778544623 | 1,212419568 | 0,843448754 | 1,072730888 |
| <i>Usp22</i>         | 0,711586912 | 0,788032151 | 1,165617809 | 0,81744543  | 1,179027722 |
| <i>Agpat9</i>        | 0,690095411 | 0,616016843 | 1,178536653 | 0,903166203 | 1,167272488 |
| <i>Alyref</i>        | 0,639375272 | 0,658294018 | 1,258962869 | 1,035603222 | 1,040228502 |
| <i>Mrpl18</i>        | 0,575916233 | 0,764332856 | 1,454502829 | 1,00942486  | 1,089684867 |
| <i>Mycn</i>          | 0,944743745 | 0,633754757 | 1,538528422 | 0,541888356 | 1,033689859 |
| <i>Ocstamp</i>       | 0,775628164 | 0,356296318 | 1,143518906 | 0,924426698 | 1,077818828 |
| <i>Mmp11</i>         | 0,778383298 | 0,450740981 | 1,032536687 | 0,885061068 | 0,980992769 |
| <i>2810428/15Rik</i> | 0,882799471 | 0,446155282 | 1,049703051 | 1,015446056 | 1,136695472 |
| <i>Ppm1n</i>         | 0,828121126 | 0,353932558 | 1,220458866 | 1,056857012 | 0,996005638 |
| <i>Itgax</i>         | 0,770067317 | 0,69920468  | 1,002011389 | 0,815723243 | 0,977974498 |
| <i>Scarf1</i>        | 0,711555586 | 0,687517134 | 1,012590066 | 0,936431699 | 1,022468808 |
| <i>Mrpl28</i>        | 0,691814885 | 0,699983144 | 1,107019089 | 0,959396345 | 0,90634734  |
| <i>2900002K06Rik</i> | 0,864471629 | 0,599232118 | 1,03686733  | 0,901481891 | 0,867764518 |
| <i>Mcrs1</i>         | 0,885265927 | 0,609374583 | 1,003110001 | 0,951790074 | 0,939404633 |
| <i>Rbm19</i>         | 0,908379348 | 0,693637747 | 1,182983463 | 0,736242034 | 1,210897151 |
| <i>Ceacam16</i>      | 0,918788823 | 0,673459159 | 1,127109697 | 0,749900949 | 1,118149353 |
| <i>Tmem161a</i>      | 1,000967582 | 0,676779856 | 1,048244423 | 0,84329995  | 1,121144184 |
| <i>Gm505</i>         | 1,005230644 | 0,619623735 | 1,224903116 | 0,710989282 | 1,033350161 |
| <i>Foxj1</i>         | 1,092561801 | 0,621223315 | 0,982710354 | 0,960426889 | 1,007802829 |
| <i>Cdhr5</i>         | 1,018319601 | 0,565566193 | 0,999078618 | 0,945858842 | 1,041367866 |
| <i>Lrrc25</i>        | 1,028909708 | 0,534320977 | 1,101257433 | 0,992493192 | 1,021617801 |
| <i>1700021N21Rik</i> | 1,162515667 | 0,591040977 | 1,087253338 | 0,827640421 | 0,946383163 |
| <i>Gm7325</i>        | 1,269609871 | 0,454016299 | 1,349633841 | 0,965065985 | 1,040910655 |
| <i>Islr</i>          | 1,073667572 | 0,432286676 | 1,453598064 | 0,772673878 | 1,296224782 |
| <i>Atp5e</i>         | 1,05783284  | 0,416646959 | 1,400216937 | 1,003568914 | 1,464954212 |
| <i>Cyc1</i>          | 1,0147318   | 0,32428805  | 1,251461986 | 1,062410427 | 1,463647334 |
| <i>Zscan12</i>       | 0,361213414 | 0,918188827 | 0,840454934 | 0,749631009 | 1,189036117 |
| <i>Was</i>           | 0,386116793 | 0,923733718 | 0,95531133  | 0,635017961 | 1,120742087 |
| <i>Uqcrh</i>         | 0,320665148 | 0,939227726 | 0,935202163 | 0,796102666 | 1,061220306 |
| <i>Rc3h1</i>         | 0,291708439 | 0,902517905 | 0,914461084 | 0,79052648  | 1,139950274 |
| <i>Ltb4r1</i>        | 0,243073371 | 0,937960177 | 1,003724694 | 0,740582701 | 1,073890576 |
| <i>Ddt</i>           | 0,280279765 | 1,193918511 | 0,906640483 | 0,709662884 | 1,212780763 |
| <i>Cldn7</i>         | 0,401935181 | 1,22671748  | 1,009966174 | 0,715076633 | 1,276457645 |
| <i>Epha1</i>         | 0,481873737 | 0,925466184 | 0,995099117 | 0,611027024 | 1,391715342 |
| <i>Kazald1</i>       | 0,418550937 | 0,930143986 | 0,956491855 | 0,657668533 | 1,315084906 |
| <i>4933416M07Rik</i> | 0,414672148 | 1,07668706  | 0,872362704 | 0,533041277 | 1,267742743 |
| <i>Tmem79</i>        | 0,649436743 | 1,104285033 | 0,973476576 | 0,583609556 | 1,328827923 |
| <i>Gabbr1</i>        | 0,568567536 | 0,824995464 | 0,746531275 | 0,402552463 | 1,01716662  |
| <i>Gm216</i>         | 0,453077165 | 0,771752806 | 0,760441821 | 0,416548821 | 1,037987264 |
| <i>Olf750</i>        | 0,435527662 | 0,889569402 | 0,880890453 | 0,437332866 | 1,023018858 |

|                      |             |             |             |             |             |
|----------------------|-------------|-------------|-------------|-------------|-------------|
| <i>Armc5</i>         | 0,433424393 | 0,798834692 | 0,781527908 | 0,57697254  | 1,061398605 |
| <i>Alg2</i>          | 0,481414085 | 0,75173168  | 0,800737063 | 0,500438339 | 1,173655143 |
| <i>Sdf2l1</i>        | 0,518096721 | 0,859487116 | 0,768109533 | 0,308726999 | 1,257928515 |
| <i>Actr1b</i>        | 0,531785345 | 0,82058234  | 0,682707754 | 0,466746584 | 1,22387306  |
| <i>Pfn4</i>          | 0,700348904 | 0,957528092 | 0,856656076 | 0,4652008   | 1,077303676 |
| <i>Hipk4</i>         | 0,686731888 | 0,80656652  | 0,980215139 | 0,375743559 | 1,197226484 |
| <i>Wdr31</i>         | 0,618107907 | 0,873998964 | 0,999952962 | 0,909720691 | 1,130702982 |
| <i>Agbl5</i>         | 0,635535184 | 0,859813452 | 0,96923523  | 0,906139852 | 1,158779914 |
| <i>1700054N08Rik</i> | 0,60683269  | 0,887079599 | 0,984177921 | 0,85461988  | 1,183425455 |
| <i>Nfu1</i>          | 0,66441097  | 0,859110429 | 0,951872552 | 0,814326795 | 1,109921818 |
| <i>lqce</i>          | 0,596682722 | 0,729164213 | 1,022194169 | 0,815002266 | 1,14593115  |
| <i>l830077J02Rik</i> | 0,607930849 | 0,723863181 | 1,016850895 | 0,839647181 | 1,113109501 |
| <i>Hdac4</i>         | 0,617936568 | 0,743070096 | 1,042711197 | 0,807876468 | 1,185701774 |
| <i>Dek</i>           | 0,589927252 | 0,788777669 | 1,09845784  | 0,819506272 | 1,134606351 |
| <i>Ccdc101</i>       | 0,540223059 | 0,864933765 | 0,989160356 | 0,782167481 | 1,014437863 |
| <i>Rapgef4</i>       | 0,596875834 | 0,903164897 | 1,021443324 | 0,847099782 | 1,000692479 |
| <i>Mef2a</i>         | 0,648187335 | 0,896085803 | 1,012693613 | 0,772949178 | 0,977654921 |
| <i>Tmem63b</i>       | 0,669659182 | 0,854124636 | 1,012017632 | 0,759902738 | 0,980895754 |
| <i>Gbp6</i>          | 0,657336553 | 0,847250242 | 1,024578132 | 0,823484065 | 0,93133684  |
| <i>Nsmaf</i>         | 0,734719244 | 0,907990669 | 0,899858411 | 0,790917133 | 1,043215844 |
| <i>Taok2</i>         | 0,747898427 | 0,866066898 | 0,941915578 | 0,815951102 | 1,046092567 |
| <i>Al846148</i>      | 0,79994829  | 0,933772744 | 0,989165218 | 0,859212877 | 1,111260828 |
| <i>Trak2</i>         | 0,74536665  | 0,926884627 | 1,01381893  | 0,855257897 | 1,094119256 |
| <i>Mkrn2</i>         | 0,70062515  | 0,856257197 | 0,908836429 | 0,833053612 | 1,158227876 |
| <i>Jph4</i>          | 0,725410559 | 0,839725959 | 0,871627767 | 0,825176954 | 1,191744515 |
| <i>Msh2</i>          | 0,744038133 | 0,794377723 | 0,901671513 | 0,795641073 | 1,139788692 |
| <i>Rcc1</i>          | 0,765596539 | 0,792915789 | 0,915521901 | 0,777418811 | 1,123763234 |
| <i>Rnf215</i>        | 0,710411573 | 0,859718659 | 1,058714837 | 0,680720564 | 1,114653389 |
| <i>Nt5dc3</i>        | 0,576529577 | 0,858179344 | 0,975066845 | 0,643130472 | 1,144233478 |
| <i>Tgoln1</i>        | 0,535227647 | 0,949306343 | 1,036154298 | 0,707048604 | 1,022160582 |
| <i>Ncoa4</i>         | 0,59146213  | 1,012539265 | 1,043351997 | 0,711223196 | 1,135867545 |
| <i>Arsg</i>          | 0,590912525 | 1,039692118 | 1,055034094 | 0,826539425 | 0,983066646 |
| <i>Rab6b</i>         | 0,592532303 | 1,063042301 | 1,009725614 | 0,774478168 | 1,023222861 |
| <i>Pabpn1</i>        | 0,514233958 | 1,051622091 | 0,927983777 | 0,810760482 | 0,978510305 |
| <i>Nsf</i>           | 0,485818742 | 0,987463173 | 0,892069246 | 0,885466736 | 1,006794587 |
| <i>Kdm4a</i>         | 0,47646509  | 1,00301056  | 0,898981559 | 0,844204544 | 1,012869044 |
| <i>Zfp410</i>        | 0,48754617  | 0,932990008 | 0,910463844 | 0,866395225 | 1,077150506 |
| <i>Ykt6</i>          | 0,40746353  | 0,926251127 | 0,928984283 | 0,797494292 | 1,050318973 |
| <i>Zfp236</i>        | 0,404188272 | 0,929767348 | 0,958706001 | 0,86659473  | 1,018935046 |
| <i>Gcn1l1</i>        | 0,540637195 | 0,695701598 | 0,893121625 | 0,859475667 | 1,18342068  |
| <i>Coq2</i>          | 0,60032004  | 0,712492723 | 0,869802234 | 0,82922502  | 1,19869875  |
| <i>Fscn2</i>         | 0,629311992 | 0,776521339 | 0,863605552 | 0,852982112 | 1,131206455 |
| <i>Brap</i>          | 0,544388818 | 0,789464896 | 0,777055801 | 0,881786161 | 1,18039933  |
| <i>Bloc1s2</i>       | 0,534854632 | 0,792777967 | 0,859785452 | 0,910974747 | 1,33599895  |
| <i>Rfc5</i>          | 0,583947227 | 0,782579349 | 0,869936524 | 0,92064105  | 1,240014954 |
| <i>Cbr3</i>          | 0,520642232 | 0,708139737 | 0,823005801 | 0,947986535 | 1,268547748 |
| <i>Ptpmt1</i>        | 0,612688706 | 0,799355855 | 0,648501995 | 0,856705488 | 1,251832474 |
| <i>Enox</i>          | 0,534842862 | 0,758005825 | 0,665812921 | 0,723416607 | 1,236776311 |
| <i>Snhg5</i>         | 0,422846821 | 0,821061635 | 0,938470287 | 0,799303154 | 1,341594979 |
| <i>Zfyve27</i>       | 0,481797595 | 0,86623958  | 0,969431422 | 0,754202022 | 1,285633027 |
| <i>Isca2</i>         | 0,549514831 | 0,775191984 | 0,862359221 | 0,824196608 | 1,237295205 |

|                      |             |             |             |             |             |
|----------------------|-------------|-------------|-------------|-------------|-------------|
| <i>Dctn3</i>         | 0,562611805 | 0,803292002 | 0,862580175 | 0,780430611 | 1,297124563 |
| <i>Lamtor2</i>       | 0,479229282 | 0,814289992 | 0,896910904 | 0,718375989 | 1,226968061 |
| <i>Hyls1</i>         | 0,400251242 | 0,769142564 | 0,844810623 | 0,764134065 | 1,236305149 |
| <i>Rab9</i>          | 0,447833602 | 0,710721146 | 0,858634742 | 0,717640848 | 1,147635541 |
| <i>Ubp1</i>          | 0,397389721 | 0,72843382  | 0,839890406 | 0,688182892 | 1,182531194 |
| <i>Rnf144a</i>       | 0,555110674 | 0,844931085 | 0,724293256 | 0,948754105 | 1,060388342 |
| <i>Pcgf2</i>         | 0,548819317 | 0,866166558 | 0,78463586  | 0,962406226 | 1,041969854 |
| <i>Sirt1</i>         | 0,471685888 | 0,820998698 | 0,727924274 | 0,909370758 | 1,023879655 |
| <i>Nol12</i>         | 0,422427445 | 0,829039694 | 0,711492098 | 0,889195172 | 1,061266048 |
| <i>Zfp346</i>        | 0,526843289 | 0,740830873 | 0,779692782 | 0,93948923  | 1,041766387 |
| <i>Mto1</i>          | 0,515770227 | 0,746111117 | 0,827410757 | 0,986347444 | 1,025747061 |
| <i>E130307A14Rik</i> | 0,503860111 | 0,798741246 | 0,867703878 | 0,928878915 | 1,047727773 |
| <i>Zfp507</i>        | 0,493852604 | 0,805431301 | 0,87569547  | 0,878769227 | 1,067348084 |
| <i>D17Wsu104e</i>    | 0,508189497 | 0,776367869 | 0,845166335 | 0,923434509 | 1,158293482 |
| <i>Ccpg1</i>         | 0,455147246 | 0,769657635 | 0,842178683 | 0,918554336 | 1,104570779 |
| <i>Cdc3711</i>       | 0,451813292 | 0,766377074 | 0,791980135 | 1,001155907 | 1,140624774 |
| <i>Slc9a8</i>        | 0,409010718 | 0,774980497 | 0,815678895 | 0,901930451 | 1,197416705 |
| <i>Gnpat</i>         | 0,45218388  | 0,735885883 | 0,781446062 | 0,891153251 | 1,154332942 |
| <i>Ptpn23</i>        | 0,581616281 | 0,808622706 | 0,833748647 | 0,792252331 | 1,030690994 |
| <i>Ddx47</i>         | 0,589939846 | 0,762200002 | 0,785493893 | 0,748700467 | 1,045473591 |
| <i>Gm16062</i>       | 0,608864865 | 0,789850098 | 0,72025605  | 0,78332656  | 1,107237865 |
| <i>Urgcp</i>         | 0,561307829 | 0,869467739 | 0,841942909 | 0,838600289 | 1,087824335 |
| <i>Pomgnt1</i>       | 0,509481655 | 0,799692377 | 0,838459827 | 0,784481309 | 1,083184197 |
| <i>Mon1b</i>         | 0,478609166 | 0,611986239 | 0,86103541  | 0,695270663 | 1,087877302 |
| <i>Sec61b</i>        | 0,507505864 | 0,639927655 | 0,879475123 | 0,667192678 | 1,058486927 |
| <i>1300001I01Rik</i> | 0,518352273 | 0,602307397 | 0,854655536 | 0,746448573 | 1,095933385 |
| <i>1200011M11Rik</i> | 0,522369669 | 0,635219025 | 0,792883255 | 0,637617476 | 1,150391438 |
| <i>Dlk2</i>          | 0,53683867  | 0,642850428 | 0,777593127 | 0,677988127 | 1,162280586 |
| <i>Adcy3</i>         | 0,602165306 | 0,666784388 | 0,927948139 | 0,634467444 | 1,048900015 |
| <i>Nudt21</i>        | 0,580794074 | 0,705162127 | 0,906038563 | 0,698782513 | 1,074691405 |
| <i>Trip10</i>        | 0,597185079 | 0,714969977 | 0,824102078 | 0,65532665  | 1,067272954 |
| <i>Fam129b</i>       | 0,489961133 | 0,636707607 | 0,961716014 | 0,667663616 | 1,155139398 |
| <i>Clasrp</i>        | 0,501844277 | 0,6066332   | 0,885124412 | 0,672672633 | 1,160024369 |
| <i>Cltb</i>          | 0,480609437 | 0,673871222 | 0,87655902  | 0,618298755 | 1,088626579 |
| <i>Manbal</i>        | 0,554634319 | 0,686115801 | 0,992533022 | 0,577654192 | 1,091428193 |
| <i>Fam83a</i>        | 0,596578369 | 0,611823885 | 1,012952537 | 0,637913064 | 1,28227611  |
| <i>Atic</i>          | 0,543277145 | 0,628730777 | 1,059835078 | 0,576002638 | 1,289910774 |
| <i>4933424G06Rik</i> | 0,480479111 | 0,603138259 | 1,0147176   | 0,622324686 | 1,196934276 |
| <i>1110054O05Rik</i> | 0,433670042 | 0,828548215 | 1,036127673 | 0,767009323 | 1,096120152 |
| <i>Get4</i>          | 0,402419794 | 0,765480936 | 1,008407322 | 0,801644656 | 1,0892091   |
| <i>Tiparp</i>        | 0,479153959 | 0,809046949 | 0,966924598 | 0,761542387 | 1,081745407 |
| <i>Zfp444</i>        | 0,457201774 | 0,762413244 | 0,964236616 | 0,670938359 | 1,100676998 |
| <i>Ranbp3</i>        | 0,434819939 | 0,716747544 | 1,003196284 | 0,768193417 | 1,200437455 |
| <i>Pdhh</i>          | 0,419848095 | 0,695694052 | 0,94224335  | 0,776788223 | 1,15985732  |
| <i>Zfp7</i>          | 0,459133878 | 0,690613868 | 1,022310013 | 0,835276331 | 1,117497176 |
| <i>Erich1</i>        | 0,536403802 | 0,771204901 | 1,13565839  | 0,697928299 | 1,124405487 |
| <i>Wdr67</i>         | 0,53198585  | 0,674290329 | 1,102506012 | 0,758590362 | 1,067852869 |
| <i>Adamts15</i>      | 0,476553558 | 0,736525658 | 1,135049845 | 0,760281102 | 0,990075543 |
| <i>4930513N10Rik</i> | 0,475382773 | 0,771456485 | 1,109381131 | 0,837629659 | 1,015630292 |
| <i>Kctd6</i>         | 0,434220714 | 0,834720921 | 0,899635723 | 0,733774859 | 1,009469383 |
| <i>Notch2</i>        | 0,540156625 | 0,80261378  | 0,903588652 | 0,735343689 | 1,02461006  |

|                      |             |             |             |             |              |
|----------------------|-------------|-------------|-------------|-------------|--------------|
| <i>Actn2</i>         | 0,50716498  | 0,833806346 | 0,989754718 | 0,680104659 | 1,032043731  |
| <i>Gch1</i>          | 0,545448813 | 0,784051095 | 1,0283065   | 0,637766871 | 1,000445536  |
| <i>Mosc1</i>         | 0,474304381 | 0,756929158 | 1,01566207  | 0,718193021 | 0,995158608  |
| <i>D630039A03Rik</i> | 0,518711135 | 0,750758607 | 1,29627133  | 0,567277581 | 1,11644321   |
| <i>Ccdc106</i>       | 0,556883216 | 0,719231116 | 1,256377703 | 0,58424651  | 1,06895696   |
| <i>Rims3</i>         | 0,443996652 | 0,792958934 | 1,418979249 | 0,466548602 | 1,034562177  |
| <i>Rps27l</i>        | 0,238095108 | 0,817920965 | 1,211953007 | 0,657888543 | 0,865953462  |
| <i>Pmp22</i>         | 0,271367855 | 0,724190482 | 1,272410624 | 0,633804748 | 1,015502582  |
| <i>Per1</i>          | 0,471828393 | 0,666385532 | 1,036678998 | 0,69519887  | 0,917591796  |
| <i>Tmem55b</i>       | 0,398834682 | 0,713285697 | 1,065267152 | 0,561639838 | 0,879458712  |
| <i>Enpp4</i>         | 0,364874869 | 0,65093062  | 0,958230725 | 0,518321888 | 1,083696931  |
| <i>Basp1</i>         | 0,3701561   | 0,586554654 | 1,002381948 | 0,50553111  | 1,006888873  |
| <i>Maf</i>           | 0,531126932 | 0,623013203 | 1,136704564 | 0,458518568 | 0,986273057  |
| <i>Metrn1</i>        | 0,515825916 | 0,522782131 | 1,111328779 | 0,482566572 | 0,989004124  |
| <i>Pdzk1</i>         | 0,577058818 | 0,624194522 | 1,05358001  | 0,359707684 | 0,910548001  |
| <i>Gm10584</i>       | 0,706419599 | 0,444652592 | 1,306972307 | 0,264657651 | 1,055893874  |
| <i>Gpr124</i>        | 0,515614913 | 0,465610417 | 1,262541941 | 0,368439656 | 1,108441683  |
| <i>LOC171588</i>     | 0,471865466 | 0,61377671  | 1,486787715 | 0,092527258 | 1,288448071  |
| <i>Zfp580</i>        | 0,876864142 | 0,710728381 | 1,055497433 | 0,122865954 | 1,423506217  |
| <i>Mcl1</i>          | 1,453166408 | 1,401367892 | 0,884950227 | 0,393749129 | -0,448628892 |
| <i>Arl4c</i>         | 1,228526156 | 1,490983975 | 1,749864074 | 0,060854615 | -0,300005795 |
| <i>Rnaseh2c</i>      | 1,854386943 | 0,680186188 | 2,004098374 | 1,140659301 | 0,572100984  |
| <i>Dppa5a</i>        | 1,171863037 | 0,54945845  | 2,25276875  | 1,154110772 | 0,220403157  |
| <i>A430071A18Rik</i> | 1,806579642 | 0,964071501 | 0,991645906 | 0,916974305 | 0,691887367  |
| <i>H2-Q1</i>         | 2,007655613 | 0,996570597 | 0,943473992 | 1,004613071 | 0,707165263  |
| <i>Prodh</i>         | 2,055827235 | 1,250116316 | 0,888284775 | 0,74134416  | 0,552947798  |
| <i>Fam122a</i>       | 1,897504528 | 1,113300609 | 0,862713901 | 0,816764285 | 0,712737242  |
| <i>P2rx1</i>         | 2,004521823 | 1,121965065 | 1,005662713 | 0,875985022 | 0,736850925  |
| <i>1700072O05Rik</i> | 1,890555347 | 1,173725649 | 0,920929962 | 0,753326343 | 0,885321269  |
| <i>Tnfrsf17</i>      | 1,813059209 | 1,115754867 | 0,999216911 | 0,769834476 | 0,856116377  |
| <i>Ada</i>           | 1,891855566 | 0,988238134 | 1,106435056 | 0,583601528 | 0,779461972  |
| <i>Tert</i>          | 1,884600699 | 1,153662546 | 1,119625088 | 0,623311028 | 0,859093134  |
| <i>Mfsd6l</i>        | 1,903359563 | 0,941131871 | 1,008375948 | 1,283748697 | 0,564698937  |
| <i>Pgp</i>           | 1,939747699 | 1,129461453 | 1,108366774 | 1,349171846 | 0,722776863  |
| <i>4930474N09Rik</i> | 1,981926657 | 1,221054596 | 1,231351707 | 1,145992289 | 0,533521848  |
| <i>Il2ra</i>         | 1,607438726 | 1,319752382 | 1,193853153 | 1,037381129 | 0,982471929  |
| <i>Diexf</i>         | 1,560595738 | 1,252926687 | 1,189753927 | 1,089109417 | 0,982536267  |
| <i>1110008L16Rik</i> | 1,515314662 | 1,264685488 | 1,12340086  | 1,022729846 | 0,964501124  |
| <i>Tg</i>            | 1,498951382 | 1,27674185  | 1,124597437 | 1,032107464 | 0,98084309   |
| <i>Pnck</i>          | 1,489991372 | 1,271905837 | 1,160230969 | 0,994537773 | 1,010943577  |
| <i>Parp16</i>        | 1,504424571 | 1,190043117 | 1,177691537 | 1,100156986 | 1,059357169  |
| <i>Gemin5</i>        | 1,524703322 | 1,154097791 | 1,14478081  | 1,012903479 | 1,038055035  |
| <i>Stard10</i>       | 1,634371369 | 1,303933352 | 1,278240858 | 1,027072535 | 1,077581155  |
| <i>Ap3s1</i>         | 1,559971996 | 1,346592502 | 1,280372264 | 1,089034266 | 1,052492188  |
| <i>2010015L04Rik</i> | 1,790444534 | 1,285084544 | 1,247435932 | 1,056905561 | 0,806219151  |
| <i>B930018H19</i>    | 1,845001154 | 1,351418047 | 1,264377256 | 1,024301603 | 0,929859862  |
| <i>Padi4</i>         | 1,769394314 | 1,251735598 | 1,141361904 | 0,945384601 | 0,893167282  |
| <i>4930447K03Rik</i> | 1,67702197  | 1,227960728 | 1,165606404 | 1,035340296 | 0,885257599  |
| <i>Hist1h2ac</i>     | 1,865762649 | 1,20432602  | 1,005693938 | 1,038329193 | 1,04323552   |
| <i>Gpr19</i>         | 1,832886945 | 1,221417651 | 1,016440006 | 0,943500688 | 0,901432217  |
| <i>Grasp</i>         | 1,851514184 | 1,233237487 | 1,069381274 | 0,746613021 | 1,078556417  |

|                      |             |             |             |             |             |
|----------------------|-------------|-------------|-------------|-------------|-------------|
| <i>2410057H14Rik</i> | 1,947833504 | 1,280838838 | 1,104346297 | 1,135872871 | 1,10223523  |
| <i>2010001M09Rik</i> | 2,100312633 | 1,195928628 | 1,160218085 | 1,130937386 | 0,884571946 |
| <i>4930473A02Rik</i> | 1,740316319 | 1,261607683 | 1,144538199 | 1,164917828 | 1,0009658   |
| <i>Fam125a</i>       | 1,746038547 | 1,219876704 | 0,986394048 | 1,327697043 | 0,954296238 |
| <i>A530013C23Rik</i> | 1,866429005 | 1,254739712 | 1,103896032 | 1,183587749 | 0,866096016 |
| <i>Ly6g6e</i>        | 1,869658595 | 1,257920883 | 0,978046043 | 1,229179744 | 0,89721534  |
| <i>Gm16039</i>       | 1,754738355 | 1,215524106 | 1,080750333 | 0,813792458 | 0,728687622 |
| <i>Stx8</i>          | 1,690858155 | 1,275668199 | 1,035667872 | 0,852848648 | 0,749423047 |
| <i>Gm16197</i>       | 1,628066283 | 1,143523488 | 0,998452714 | 0,806266622 | 0,83954359  |
| <i>Lman2l</i>        | 1,549463438 | 1,340499459 | 1,15175363  | 0,871360838 | 0,796615819 |
| <i>Arpp21</i>        | 1,549941825 | 1,236436369 | 1,228191757 | 0,879906036 | 0,820763411 |
| <i>Ii9r</i>          | 1,506810186 | 1,370783038 | 0,940115311 | 0,874827447 | 0,621354822 |
| <i>Ankrd37</i>       | 1,460328273 | 1,236670676 | 0,837681185 | 0,607007045 | 0,868866227 |
| <i>Camk2n2</i>       | 1,446309855 | 1,254107368 | 0,99331314  | 0,642920663 | 0,89129816  |
| <i>4930405A21Rik</i> | 1,479729043 | 1,441027046 | 0,918359707 | 0,622658929 | 0,883427625 |
| <i>1700065J18Rik</i> | 1,742912576 | 1,724888579 | 0,819850807 | 1,015143787 | 0,644237152 |
| <i>Cpxm1</i>         | 1,709869736 | 1,025993933 | 1,160987397 | 0,239540166 | 0,340669827 |
| <i>Olfr313</i>       | 1,745747808 | 0,550128676 | 1,175449098 | 0,317456875 | 0,388337597 |
| <i>Chrna10</i>       | 1,708313447 | 0,770840327 | 1,000283582 | 0,708132498 | 0,436284403 |
| <i>Gm3086</i>        | 1,546254052 | 0,792329463 | 0,897767546 | 0,799123252 | 0,364660774 |
| <i>Ccdc93</i>        | 1,457683594 | 0,880863102 | 0,912823345 | 0,729437065 | 0,645411329 |
| <i>Rimbp3</i>        | 1,461141401 | 0,849706889 | 1,022353269 | 0,801495552 | 0,544996957 |
| <i>Jazf1</i>         | 1,701233642 | 1,099112042 | 0,878292499 | 0,613907956 | 0,40700665  |
| <i>2010107G12Rik</i> | 1,592029835 | 1,026239946 | 0,798253124 | 0,527118657 | 0,488782107 |
| <i>Pnmal2</i>        | 1,526693925 | 1,1433996   | 1,014570167 | 0,545393011 | 0,414124194 |
| <i>Mgp</i>           | 1,342218411 | 0,665200482 | 1,106401497 | 0,600396711 | 0,829259254 |
| <i>Ccdc8</i>         | 1,395347414 | 0,749621246 | 1,166523406 | 0,5542727   | 0,550125193 |
| <i>Cbfa2t3</i>       | 1,54752474  | 0,850633455 | 0,835407493 | 0,474336529 | 0,668400965 |
| <i>Ephb2</i>         | 1,441850942 | 0,887774504 | 0,904885783 | 0,549124229 | 0,70155403  |
| <i>Hfe</i>           | 1,607223607 | 0,763281249 | 0,936344876 | 0,500946339 | 0,741412723 |
| <i>Crispld2</i>      | 1,489923284 | 0,991878448 | 1,06318471  | 0,55873161  | 0,73495811  |
| <i>Slc10a5</i>       | 1,451784493 | 0,876696037 | 1,074783322 | 0,497023311 | 0,643253639 |
| <i>Pla2g6</i>        | 1,518865524 | 0,934259015 | 0,947376191 | 0,649935442 | 0,759457449 |
| <i>Engase</i>        | 1,398618956 | 0,880809378 | 0,94448559  | 0,698846494 | 0,817170094 |
| <i>Dclk2</i>         | 1,324759949 | 1,045375767 | 0,99142529  | 0,711935327 | 0,744768965 |
| <i>Dpf1</i>          | 1,372710459 | 1,020919857 | 0,992100272 | 0,714955692 | 0,857224862 |
| <i>Cpsf4l</i>        | 1,572330163 | 1,037359789 | 0,86734251  | 0,58536251  | 0,714344736 |
| <i>Rasa4</i>         | 1,696401957 | 0,938680207 | 0,913288751 | 0,676924847 | 0,885001824 |
| <i>Card10</i>        | 1,584526711 | 0,856179311 | 0,967887938 | 0,751285715 | 0,865645042 |
| <i>Spib</i>          | 1,725295755 | 0,790377223 | 1,10483177  | 0,747412745 | 0,740250156 |
| <i>Six5</i>          | 1,737741985 | 0,674708626 | 0,914530929 | 0,940536999 | 0,824135112 |
| <i>Gm889</i>         | 1,740662453 | 0,893184659 | 0,785109905 | 0,490087274 | 0,6051465   |
| <i>Recql5</i>        | 1,730420092 | 0,832491936 | 0,740762767 | 0,364934876 | 0,656602427 |
| <i>4930447A16Rik</i> | 1,844400552 | 0,960316338 | 0,959719337 | 0,476871388 | 0,711012243 |
| <i>Nccrp1</i>        | 1,74189701  | 0,723962859 | 0,919335311 | 0,339831841 | 0,896705637 |
| <i>Hspa1b</i>        | 1,336715345 | 0,817017321 | 0,25356152  | 0,786749454 | 1,2584768   |
| <i>Fam203a</i>       | 1,168320136 | 0,835436318 | 0,427749746 | 0,515966522 | 1,22013009  |
| <i>1700019O17Rik</i> | 1,568095247 | 0,81955771  | 0,640179406 | 0,576805917 | 1,591020993 |
| <i>Ube2c</i>         | 1,291043826 | 1,040241594 | 0,917959853 | 0,697272715 | 1,333194035 |
| <i>Pi16</i>          | 1,270506003 | 1,075255166 | 0,725588258 | 0,595852906 | 1,243067332 |
| <i>Ccl4</i>          | 1,484640248 | 1,09420072  | 0,770602161 | 0,46610336  | 1,065715779 |

|                      |             |             |             |             |             |
|----------------------|-------------|-------------|-------------|-------------|-------------|
| <i>Tff2</i>          | 1,319101186 | 0,866644118 | 0,913343309 | 0,478162145 | 1,275901755 |
| <i>Cdkn1c</i>        | 1,36980525  | 0,81279689  | 0,867628981 | 0,646497336 | 1,302283148 |
| <i>Heyl</i>          | 1,444843149 | 0,752719619 | 1,041953125 | 0,433976781 | 1,172328189 |
| <i>2210416O15Rik</i> | 1,369335506 | 0,827946078 | 0,900917424 | 0,758975708 | 1,18562678  |
| <i>Gtpbp5</i>        | 1,289758514 | 0,824227358 | 0,844626458 | 0,716740533 | 1,138206746 |
| <i>Arl2</i>          | 1,268947826 | 0,754725281 | 0,831821377 | 0,637712184 | 1,008877921 |
| <i>Rnf187</i>        | 1,130328286 | 0,833454231 | 0,847636415 | 0,54674057  | 1,004951368 |
| <i>Slc35e2</i>       | 1,03711946  | 0,866412087 | 0,83556192  | 0,611436714 | 1,058942649 |
| <i>Uap1l1</i>        | 1,046027997 | 0,832793245 | 0,712544711 | 0,55350207  | 1,045664886 |
| <i>C230035I16Rik</i> | 1,093507229 | 0,989068815 | 0,688201576 | 0,461139792 | 1,029663559 |
| <i>Spag8</i>         | 1,208601956 | 1,310019551 | 0,235519019 | 0,368195038 | 1,257262435 |
| <i>Ldhal6b</i>       | 1,270207253 | 1,586885904 | 0,462821922 | 0,258192676 | 1,513296021 |
| <i>Bfsp2</i>         | 1,458521912 | 0,94734508  | 1,157849482 | 0,708893466 | 0,972723325 |
| <i>Lrrc42</i>        | 1,406580721 | 1,030484902 | 1,044773089 | 0,748690325 | 0,982579672 |
| <i>Snx30</i>         | 1,433848836 | 1,016956947 | 1,004944027 | 0,877882067 | 1,009286468 |
| <i>Ptprv</i>         | 1,435847706 | 0,999003669 | 0,952243917 | 0,89359911  | 1,041477928 |
| <i>Mr1</i>           | 1,413645858 | 1,086891812 | 1,009794708 | 0,822485195 | 1,072022828 |
| <i>Clns1a</i>        | 1,532469308 | 1,207449067 | 1,177664967 | 0,920897706 | 1,121951037 |
| <i>Wnt10b</i>        | 1,576468718 | 1,166675983 | 1,180353961 | 0,882437868 | 1,089043392 |
| <i>5830418P13Rik</i> | 1,646061364 | 1,128001072 | 1,249633606 | 0,86282797  | 1,044700368 |
| <i>4930588N13Rik</i> | 1,552175561 | 1,111993107 | 1,143037965 | 0,96523034  | 0,862227242 |
| <i>Vav2</i>          | 1,573335921 | 1,196716938 | 1,127819685 | 0,848548458 | 0,916769748 |
| <i>Ankrd6</i>        | 1,467457446 | 1,110715044 | 1,131708434 | 0,883786394 | 0,939957292 |
| <i>Rapgef1l</i>      | 1,534719602 | 1,063825885 | 1,080485456 | 0,909762443 | 1,007844437 |
| <i>Pppde2</i>        | 1,694288786 | 1,060865224 | 1,303127215 | 0,937052473 | 1,135108082 |
| <i>H1foo</i>         | 1,671310993 | 0,993820638 | 1,296172591 | 1,053270696 | 1,115956465 |
| <i>Dus2l</i>         | 1,66421344  | 1,007260364 | 1,15737488  | 1,062087453 | 1,2416043   |
| <i>Siva1</i>         | 1,595601501 | 0,982209775 | 1,421279394 | 1,027139205 | 1,131359414 |
| <i>BB014433</i>      | 1,503819285 | 1,088327271 | 1,330339478 | 1,072735475 | 1,159981881 |
| <i>A830010M20Rik</i> | 1,461427959 | 1,368546051 | 1,108057697 | 1,18073236  | 0,9526424   |
| <i>Slc35b4</i>       | 1,502637526 | 1,271199836 | 1,003845277 | 1,21491857  | 1,053694987 |
| <i>Map4k5</i>        | 1,441314798 | 1,240908048 | 0,994189636 | 1,026326292 | 0,910170947 |
| <i>Padi3</i>         | 1,416100855 | 1,19403597  | 1,092808672 | 1,211324891 | 0,766166079 |
| <i>Tnfrsf13b</i>     | 1,074736978 | 1,018559448 | 1,333692279 | 1,013855208 | 1,080459422 |
| <i>Slc27a1</i>       | 1,121401246 | 1,058844005 | 1,373308554 | 0,908914104 | 1,090887298 |
| <i>Hist3h2a</i>      | 1,131054989 | 1,063362325 | 1,244833073 | 0,88171609  | 1,105629026 |
| <i>AA474331</i>      | 1,231081974 | 0,98493068  | 1,375382109 | 0,997982481 | 0,952720996 |
| <i>Xirp1</i>         | 1,251618032 | 1,018654848 | 1,394289245 | 0,834734252 | 0,996663207 |
| <i>Prdm11</i>        | 1,282205276 | 1,082139269 | 1,162903407 | 0,951273661 | 1,104220484 |
| <i>Mettl8</i>        | 1,307701958 | 1,058540176 | 1,165652597 | 0,90946812  | 1,163576363 |
| <i>Wdtdc1</i>        | 1,248648309 | 1,093036875 | 1,215244401 | 0,878701797 | 1,204895161 |
| <i>Fam166a</i>       | 1,237211141 | 0,958569272 | 1,160126829 | 0,929052662 | 1,208432697 |
| <i>Pkn3</i>          | 1,320716609 | 0,97392304  | 1,17720556  | 0,93468211  | 1,129761407 |
| <i>Pdlim7</i>        | 1,221004307 | 0,961928226 | 1,187423428 | 0,874031191 | 1,10171641  |
| <i>Tctn2</i>         | 1,388980471 | 1,104526537 | 1,363201279 | 0,925194418 | 1,314070436 |
| <i>Emid1</i>         | 1,396352675 | 1,115585398 | 1,346559278 | 0,898674411 | 1,232660597 |
| <i>1700028I16Rik</i> | 1,321565705 | 1,173108205 | 1,32953991  | 0,904128142 | 1,307382247 |
| <i>Ppp1r37</i>       | 1,35415317  | 1,160141134 | 1,277780264 | 1,055137837 | 1,206045696 |
| <i>Myo18a</i>        | 1,31073205  | 1,145080388 | 1,347306039 | 1,066116339 | 1,274351078 |
| <i>Cd96</i>          | 1,190399694 | 1,188742795 | 1,385508197 | 0,964393545 | 1,213838806 |
| <i>Ptprs</i>         | 1,25991713  | 1,001970717 | 1,305177287 | 0,950091868 | 1,202497008 |

|                      |             |             |             |             |             |
|----------------------|-------------|-------------|-------------|-------------|-------------|
| <i>Rsph1</i>         | 1,248975488 | 1,048515643 | 1,297787128 | 0,939808995 | 1,194254829 |
| <i>Ctcf1</i>         | 1,198338379 | 0,978445103 | 1,251131904 | 1,003148516 | 1,263968806 |
| <i>Fxyd7</i>         | 1,301700728 | 1,044671961 | 1,377636782 | 1,056444429 | 1,330312387 |
| <i>Tom1l2</i>        | 1,394184431 | 1,058616571 | 1,008896873 | 0,804287249 | 0,874383886 |
| <i>Dbh</i>           | 1,380661616 | 1,100912423 | 1,051121818 | 0,855205324 | 0,855970392 |
| <i>Fam83d</i>        | 1,370470838 | 1,109900163 | 0,941722358 | 0,803654138 | 0,947042729 |
| <i>Gm19897</i>       | 1,324309735 | 1,121507682 | 0,995167519 | 0,835753871 | 0,928297649 |
| <i>Dio1</i>          | 1,220223214 | 1,139781782 | 1,030369852 | 0,83992704  | 0,815832006 |
| <i>Il12a</i>         | 1,217965979 | 1,099626452 | 1,060987993 | 0,825614121 | 0,909802607 |
| <i>2010012005Rik</i> | 1,247747207 | 1,109889631 | 0,986975541 | 0,914044035 | 0,854097558 |
| <i>Ly6i</i>          | 1,244288783 | 1,087448452 | 0,966920393 | 0,888507641 | 0,882927654 |
| <i>Lrrc27</i>        | 1,371152636 | 1,131944244 | 1,166117579 | 0,992414221 | 0,794079492 |
| <i>Lass6</i>         | 1,393988103 | 1,187810943 | 1,13836997  | 1,014953101 | 0,909125754 |
| <i>Dnajb4</i>        | 1,36992013  | 1,027865277 | 1,045479929 | 0,951197679 | 0,861330395 |
| <i>Slc35d1</i>       | 1,321631705 | 1,061766045 | 1,039110892 | 0,934389733 | 0,890271293 |
| <i>Coro2b</i>        | 1,331161909 | 1,075571401 | 1,040310714 | 0,880589032 | 0,890814202 |
| <i>Prep</i>          | 1,368656718 | 1,068533208 | 1,06005599  | 0,899248893 | 0,919462083 |
| <i>C2cd2l</i>        | 1,309430805 | 0,960207248 | 1,183071241 | 0,904783124 | 1,002638275 |
| <i>Akap12</i>        | 1,307130966 | 1,120020401 | 1,153561815 | 0,868903003 | 0,944883208 |
| <i>Cdr2l</i>         | 1,123490478 | 1,011419261 | 1,127001302 | 0,846157727 | 0,977836227 |
| <i>Cux1</i>          | 1,156219307 | 1,093948285 | 1,186587454 | 0,836841674 | 1,015707158 |
| <i>Myl10</i>         | 1,228904975 | 0,946513914 | 1,195472735 | 0,813571096 | 0,816778487 |
| <i>Tigd3</i>         | 1,416737156 | 0,765621614 | 1,168451897 | 0,771798889 | 0,926443847 |
| <i>Fbxo6</i>         | 1,38407683  | 0,784313102 | 1,204663    | 0,929063343 | 1,031427517 |
| <i>4930524005Rik</i> | 1,510278785 | 0,853865615 | 1,176163337 | 0,971480597 | 0,892941107 |
| <i>Efcab4a</i>       | 1,341081663 | 0,730823672 | 1,157855013 | 1,106794115 | 1,003573256 |
| <i>Pnp0</i>          | 1,276853227 | 0,78578161  | 1,058611    | 1,035104166 | 0,905243432 |
| <i>Gpr84</i>         | 1,240027534 | 0,716391936 | 1,219947223 | 0,978189249 | 0,858166211 |
| <i>Mageb3</i>        | 1,38495854  | 0,960036534 | 1,445002166 | 0,733026959 | 0,616889157 |
| <i>I730028E13Rik</i> | 1,454084333 | 1,098864143 | 1,387168399 | 0,87568929  | 0,743344858 |
| <i>Btnl10</i>        | 1,6543412   | 1,019394552 | 1,199772995 | 0,845051579 | 0,59050855  |
| <i>Lrrc32</i>        | 1,560886412 | 0,958509475 | 1,218736077 | 0,727028818 | 0,723255998 |
| <i>B930041F14Rik</i> | 1,648445223 | 0,929693528 | 1,24934993  | 0,437731286 | 1,336585062 |
| <i>Tnni2</i>         | 1,552209989 | 0,960939829 | 1,305295216 | 0,562681282 | 1,322519472 |
| <i>Tmem111</i>       | 1,608169249 | 0,973948713 | 1,029892855 | 0,62090674  | 1,220103111 |
| <i>Tssk4</i>         | 1,937924258 | 1,009485876 | 1,075548135 | 0,556228328 | 1,346262691 |
| <i>Gm826</i>         | 1,758715195 | 1,156148312 | 1,374637198 | 0,692566578 | 0,963916727 |
| <i>BC055111</i>      | 1,771461407 | 1,19756277  | 1,252842041 | 0,673530025 | 1,050209184 |
| <i>Reep1</i>         | 1,668950515 | 1,079172522 | 1,473604979 | 0,805372937 | 1,172072992 |
| <i>Cd24a</i>         | 1,444846023 | 1,033345686 | 1,316371638 | 0,658828509 | 1,072276799 |
| <i>Tagln</i>         | 1,310034207 | 0,925963823 | 1,279406476 | 0,626812252 | 1,09960303  |
| <i>Tmem8c</i>        | 1,321965798 | 1,036117072 | 1,297416073 | 0,474011521 | 0,974169439 |
| <i>Rasl10a</i>       | 1,326836679 | 0,756696237 | 1,420279795 | 0,639144742 | 1,066698105 |
| <i>Gsg2</i>          | 1,200081874 | 0,876039699 | 1,158690774 | 0,681524761 | 1,405548648 |
| <i>Fzd5</i>          | 1,304852951 | 0,908415528 | 1,147588812 | 0,546278399 | 1,352888267 |
| <i>Gpx4</i>          | 1,469558735 | 1,14900384  | 1,098308709 | 1,242345686 | 1,559338717 |
| <i>Tnfsf14</i>       | 1,385794596 | 1,128984708 | 1,216334575 | 1,134578892 | 1,588295827 |
| <i>Fam109b</i>       | 1,46127409  | 1,144477771 | 1,142811546 | 0,957403736 | 1,623341858 |
| <i>Slc29a1</i>       | 1,560368177 | 1,107638387 | 1,27924892  | 1,003331827 | 1,552711895 |
| <i>Uhrf1</i>         | 1,596929026 | 1,030867338 | 1,329016608 | 1,019489637 | 1,46193766  |
| <i>Ccdc124</i>       | 1,626890603 | 1,029739029 | 1,17428394  | 1,138956495 | 1,506750358 |

|                      |             |             |             |             |              |
|----------------------|-------------|-------------|-------------|-------------|--------------|
| <i>Pim1</i>          | 1,568688711 | 1,052781937 | 0,954084695 | 1,127369838 | 1,497169603  |
| <i>Ldoc1l</i>        | 1,760933203 | 0,99257605  | 0,945149555 | 1,15792836  | 1,411477339  |
| <i>Wdr5b</i>         | 1,418259517 | 0,845351498 | 1,175517244 | 1,011158433 | 1,438596205  |
| <i>Hirip3</i>        | 1,349511354 | 0,850676689 | 1,246533744 | 1,121920244 | 1,528021575  |
| <i>Reep6</i>         | 1,421304123 | 0,846121134 | 1,153842264 | 0,894399157 | 1,587454011  |
| <i>Nrarp</i>         | 1,458079419 | 0,75231374  | 1,489712681 | 0,901416275 | 1,424334423  |
| <i>B3gnt1</i>        | 1,476812046 | 0,941932274 | 1,510766262 | 1,090975639 | 1,701821076  |
| <i>Tnfrsf13c</i>     | 1,38248526  | 0,90935379  | 1,411352561 | 0,891300156 | 1,648249177  |
| <i>Maff</i>          | 1,553126796 | 1,056075515 | 1,487110615 | 0,827600771 | 1,53971201   |
| <i>Tmem52</i>        | 2,072712318 | 0,601450697 | 1,09886551  | 0,969842921 | 1,335438596  |
| <i>AA467197</i>      | 1,535395451 | 0,470043105 | 1,020058951 | 0,756810084 | 1,219142796  |
| <i>5830403L16Rik</i> | 1,660071438 | 0,968415954 | 1,634440739 | 0,009459712 | 1,601091432  |
| <i>Cxx1b</i>         | 1,291026559 | 0,930583018 | 1,954627031 | 0,183272925 | 0,936884937  |
| <i>Ntn1</i>          | 1,526767587 | 0,941278541 | 0,6867841   | 0,576928997 | 0,392006896  |
| <i>Lrrc15</i>        | 1,598658539 | 0,816680446 | 0,648834566 | 0,525904766 | 0,46042341   |
| <i>Wnt8b</i>         | 1,473400724 | 0,818365066 | 0,691443441 | 0,515526197 | 0,284825499  |
| <i>Slc43a1</i>       | 1,374487297 | 0,848364597 | 0,699353039 | 0,44855846  | 0,386657344  |
| <i>Dgcr6</i>         | 1,507305144 | 0,754912172 | 0,564744464 | 0,441082582 | 0,193434619  |
| <i>BC048355</i>      | 1,548394699 | 0,7780617   | 0,461031387 | 0,659395625 | 0,576338544  |
| <i>Gm8909</i>        | 1,512277266 | 1,027923031 | 0,54916918  | 0,619043059 | 0,317698409  |
| <i>Foxb1</i>         | 1,38775167  | 1,096087178 | 0,438225348 | 0,407533519 | 0,16594836   |
| <i>1110054M08Rik</i> | 1,413706432 | 0,618745253 | 0,846103914 | 0,713955004 | -0,154944198 |
| <i>Tff3</i>          | 1,086257748 | 0,602106122 | 0,322650408 | 0,6761416   | -0,125798708 |
| <i>Fam64a</i>        | 1,051317734 | 0,487925491 | 0,34697188  | 0,576735116 | 0,146649891  |
| <i>Ly6g6c</i>        | 0,975300938 | 1,065661375 | 0,331263844 | 0,605084848 | -0,135455107 |
| <i>C2cd4a</i>        | 1,086506532 | 1,097881786 | 0,223145041 | 0,568270068 | -0,084753494 |
| <i>Kctd18</i>        | 1,197711363 | 0,74719847  | 0,667682135 | 0,460185872 | 0,750190684  |
| <i>Ggnbp1</i>        | 1,144056844 | 0,677554477 | 0,648043238 | 0,445418056 | 0,680933841  |
| <i>Spsb4</i>         | 1,272541099 | 0,723792107 | 0,701311736 | 0,465336596 | 0,589244798  |
| <i>Klhl23</i>        | 1,198444404 | 0,62157722  | 0,663810745 | 0,59839383  | 0,631040786  |
| <i>2010300C02Rik</i> | 1,240543243 | 0,696436825 | 0,672669995 | 0,548246844 | 0,658761397  |
| <i>E2f1</i>          | 1,168186443 | 0,678104136 | 0,676375368 | 0,575212411 | 0,733834698  |
| <i>Msh4</i>          | 1,065437652 | 0,677392668 | 0,633261671 | 0,550706058 | 0,602109124  |
| <i>Dclre1c</i>       | 1,111281127 | 0,683295699 | 0,579217146 | 0,46260711  | 0,564855209  |
| <i>Aars2</i>         | 1,029642477 | 0,588265449 | 0,705515609 | 0,425108651 | 0,735721978  |
| <i>Chadl</i>         | 1,038933043 | 0,553837876 | 0,597596477 | 0,440571053 | 0,698672173  |
| <i>Srsf2</i>         | 1,035488343 | 0,521519767 | 0,706987528 | 0,485259339 | 0,766391243  |
| <i>Itgb4</i>         | 1,045233332 | 0,532119913 | 0,668209772 | 0,489014133 | 0,829237728  |
| <i>Ppp2r5b</i>       | 1,097562732 | 0,590687956 | 0,526705061 | 0,433914062 | 0,856984117  |
| <i>Klhl33</i>        | 1,273378938 | 0,717008887 | 0,671457884 | 0,643392292 | 0,85572322   |
| <i>Fam76a</i>        | 1,134433437 | 0,794594706 | 0,684897909 | 0,589712321 | 0,803204931  |
| <i>Cort</i>          | 1,138563457 | 0,617886804 | 0,724736122 | 0,603694404 | 0,889469922  |
| <i>Ogfod2</i>        | 1,089164215 | 0,635659852 | 0,595523153 | 0,592821195 | 0,877850189  |
| <i>Ctf1</i>          | 1,080688798 | 0,680359515 | 0,490596358 | 0,61815374  | 0,724475644  |
| <i>Trmt1</i>         | 1,036975962 | 0,572188505 | 0,442805664 | 0,733835879 | 0,724547915  |
| <i>Guca2a</i>        | 1,035795197 | 0,643971584 | 0,555808354 | 0,7538298   | 0,605090109  |
| <i>Synpo2l</i>       | 1,153017543 | 0,665412982 | 0,531200885 | 0,697257081 | 0,625983196  |
| <i>Aanat</i>         | 1,383652825 | 0,61439223  | 0,628678662 | 0,374772204 | 0,803137549  |
| <i>Ccdc78</i>        | 1,474428875 | 0,689907495 | 0,548156937 | 0,504704004 | 0,730727581  |
| <i>Kis2</i>          | 1,461224841 | 0,517759374 | 0,548487563 | 0,708662361 | 0,797480414  |
| <i>Iscu</i>          | 1,373216854 | 0,717756617 | 0,696436494 | 0,506601628 | 0,748368494  |



|                      |             |              |              |              |              |
|----------------------|-------------|--------------|--------------|--------------|--------------|
| <i>Atp1a3</i>        | 1,421414891 | 0,802521479  | 0,714778162  | 0,591534515  | 0,66697572   |
| <i>Cyp11b2</i>       | 1,380831333 | 0,516651921  | 0,739062006  | 0,641246472  | 0,571122729  |
| <i>Pld6</i>          | 1,198828518 | 0,775904093  | 0,42844725   | 0,329024534  | 0,980656792  |
| <i>Sac3d1</i>        | 1,383625757 | 0,750614483  | 0,26735195   | 0,19187049   | 0,852651932  |
| <i>2610306M01Rik</i> | 1,406180139 | 0,577440033  | 0,625429228  | 0,137536562  | 0,858033321  |
| <i>Syt6</i>          | 1,163920019 | 0,616459037  | 0,579377636  | 0,297646117  | 0,638174404  |
| <i>Mapk8ip1</i>      | 1,024554956 | 0,568927607  | 0,53943724   | 0,351246854  | 0,572050544  |
| <i>Kcnk5</i>         | 1,025711973 | 0,586681835  | 0,736857123  | 0,266778211  | 0,665356218  |
| <i>Vwce</i>          | 1,040474927 | 0,626354502  | 0,65426222   | 0,325743963  | 0,391420797  |
| <i>Scube3</i>        | 1,005304998 | 0,605508115  | 0,713886883  | 0,226643597  | 0,420800365  |
| <i>4931402G19Rik</i> | 1,26317998  | 0,718105096  | 0,908952245  | 0,200313677  | 0,567551936  |
| <i>Mrgpre</i>        | 1,117281485 | 0,642810373  | 0,63831833   | 0,5406159    | 0,385089807  |
| <i>Ltbp4</i>         | 1,274904451 | 0,590716548  | 0,62029334   | 0,471622037  | 0,347817535  |
| <i>Chst3</i>         | 1,275318283 | 0,682757436  | 0,770475201  | 0,502060816  | 0,423968656  |
| <i>Cebpe</i>         | 1,332201037 | 0,71827503   | 0,734409077  | 0,600240388  | 0,439459354  |
| <i>1700047M11Rik</i> | 1,232320942 | 0,743753936  | 0,641138174  | 0,449897587  | 0,406920205  |
| <i>Mab21l3</i>       | 1,267666067 | 0,750715129  | 0,685552695  | 0,457831898  | 0,48688913   |
| <i>Cyp11b1</i>       | 1,262737722 | 0,75736001   | 0,61470755   | 0,384083381  | 0,494915513  |
| <i>Ganc</i>          | 1,208346972 | 0,778360426  | 0,643811235  | 0,343323809  | 0,352061354  |
| <i>Wisp3</i>         | 1,122236945 | 0,818641994  | 0,732442523  | 0,415381673  | 0,427488386  |
| <i>Bcat1</i>         | 1,162898279 | 0,814175369  | 0,706514235  | 0,500110106  | 0,418761213  |
| <i>1810041L15Rik</i> | 1,070575051 | 0,722399857  | 0,744152228  | 0,484946444  | 0,475249519  |
| <i>Il17re</i>        | 1,193633732 | 0,779831287  | 0,573645431  | 0,498535303  | 0,166149358  |
| <i>Sec31b</i>        | 1,128666597 | 0,678956526  | 0,593557808  | 0,444395045  | 0,18477048   |
| <i>Slc7a11</i>       | 1,167893699 | 0,687826669  | 0,489888611  | 0,368703708  | 0,226353104  |
| <i>Osbpl1a</i>       | 1,017612553 | 0,768360855  | 0,609306747  | 0,380524954  | 0,289821607  |
| <i>Camkv</i>         | 1,186361643 | 0,529078428  | 0,44616953   | 0,372004746  | 0,613720425  |
| <i>Acbd7</i>         | 1,104697648 | 0,423983148  | 0,39627731   | 0,364482702  | 0,554217317  |
| <i>Gm6320</i>        | 1,172892671 | 0,62474515   | 0,451189594  | 0,366984227  | 0,415194109  |
| <i>Parvb</i>         | 1,081906662 | 0,596318746  | 0,590183603  | 0,469653595  | 0,477105156  |
| <i>Pkig</i>          | 1,000686451 | 0,627503629  | 0,553526383  | 0,495866456  | 0,490887789  |
| <i>1110058L19Rik</i> | 1,016503783 | 0,514614893  | 0,511268201  | 0,537789097  | 0,411423262  |
| <i>Tdrd1</i>         | 1,02348855  | 0,76012458   | 0,304097135  | 0,428327942  | 0,622350366  |
| <i>Gh</i>            | 1,13618456  | 0,64894684   | 0,287330568  | 0,176718927  | 0,432267649  |
| <i>Sdc4</i>          | 1,110052007 | 0,60278344   | 0,421929497  | 0,148232593  | 0,355409095  |
| <i>Slc45a3</i>       | 1,007673676 | 0,538017594  | 0,405256878  | 0,074855215  | 0,536897623  |
| <i>Lypd2</i>         | 1,318622853 | 1,032553643  | -0,468483653 | -0,305583646 | 0,236582301  |
| <i>Gpr27</i>         | 1,233207005 | 0,89581586   | -0,530103931 | -0,038380791 | -0,49419847  |
| <i>Cxx1c</i>         | 1,2469941   | 1,207897461  | -0,005782963 | -0,36517501  | 0,465210392  |
| <i>Lor</i>           | 1,298716192 | -0,015971668 | 0,007508525  | 0,21513228   | -0,101012349 |
| <i>Ltb4r2</i>        | 1,41868426  | 0,152073544  | -0,425865458 | -0,056816403 | -0,483603232 |
| <i>Xlr5c</i>         | 1,160452858 | -0,335315797 | 0,256295843  | -0,701554571 | -0,708996674 |
| <i>Nog</i>           | 1,29088323  | 0,136840784  | 0,166109535  | -0,460273159 | -0,137735534 |
| <i>Xlr5b</i>         | 1,113400334 | -0,554831707 | 0,030185247  | -0,392926427 | -0,104955056 |
| <i>9930005F22Rik</i> | 1,433959717 | 0,159680225  | 0,034742074  | 0,14574205   | 0,203193912  |
| <i>Kif12</i>         | 1,441753768 | 0,173954814  | -0,076219837 | -0,136190979 | 0,312166126  |
| <i>H2-BI</i>         | 1,001223704 | 0,265855999  | 0,012607063  | -0,256156598 | -0,503143985 |
| <i>Rtn4r</i>         | 1,007579964 | 0,315025676  | 0,054415029  | 0,039636502  | -0,106461029 |
| <i>Gltpd2</i>        | 1,122171187 | 0,355331339  | -0,0580801   | -0,32641762  | 0,137931008  |
| <i>Gfi1b</i>         | 1,115505071 | 0,364270553  | 0,319009822  | -0,127887431 | 0,048410176  |
| <i>Nwd1</i>          | 1,13995077  | 0,420726397  | 0,31534818   | -0,014642042 | 0,025020935  |

|                      |             |              |             |              |              |
|----------------------|-------------|--------------|-------------|--------------|--------------|
| <i>Hmgcs2</i>        | 1,154804366 | 0,354938702  | 0,33962522  | 0,103875331  | -0,151653007 |
| <i>Olfr543</i>       | 1,152520591 | 0,241603499  | 0,402992576 | -0,173690542 | -0,159570455 |
| <i>Tomm40l</i>       | 1,019117894 | 0,301564466  | 0,407397065 | 0,298503758  | 0,333093139  |
| <i>Ptges</i>         | 1,006657674 | 0,423322613  | 0,241965731 | 0,259868444  | 0,358095558  |
| <i>6430571L13Rik</i> | 1,041473097 | 0,459642293  | 0,353394136 | 0,153241417  | 0,308340073  |
| <i>Espnl</i>         | 1,099148967 | 0,325303544  | 0,393124945 | 0,147788682  | 0,240960436  |
| <i>Rgl3</i>          | 1,256834564 | 0,272934872  | 0,255095754 | 0,267258086  | 0,251834118  |
| <i>2410017I17Rik</i> | 1,405523701 | 0,497669484  | 0,431318211 | 0,372540946  | 0,381121611  |
| <i>2610109H07Rik</i> | 1,346677839 | 0,568182663  | 0,462681082 | 0,232264232  | 0,259433446  |
| <i>Gpr156</i>        | 1,053826422 | 0,555563309  | 0,434763891 | 0,222032386  | 0,113212381  |
| <i>Acsf3</i>         | 1,150824428 | 0,511030505  | 0,400297046 | 0,193287147  | 0,156782158  |
| <i>Pde10a</i>        | 1,030954191 | 0,483538684  | 0,329843427 | 0,203318655  | 0,032082373  |
| <i>Rnf222</i>        | 1,176079788 | 0,543028181  | 0,292809375 | 0,266012596  | 0,208248062  |
| <i>Lcn6</i>          | 1,132566716 | 0,508469469  | 0,345898515 | -0,050666409 | 0,153478009  |
| <i>Trim29</i>        | 1,187104918 | 0,639044865  | 0,284478703 | 0,031109315  | 0,108378221  |
| <i>Fam159b</i>       | 1,291003204 | 0,507680676  | 0,550504862 | 0,184150552  | -0,100579828 |
| <i>Vmn2r35</i>       | 1,759849146 | -0,481012472 | 0,26592269  | -0,999830918 | -0,795559046 |
| <i>Gm5464</i>        | 1,638860031 | -0,203672325 | 0,263734739 | -0,274635472 | 0,202748853  |
| <i>5730577I03Rik</i> | 1,869099238 | 0,300565     | 0,365305702 | 0,063951319  | 0,174595952  |
| <i>Pfn1</i>          | 1,885181462 | 0,773433639  | 0,422111414 | -1,149228458 | -1,197865009 |
| <i>1700012D01Rik</i> | 1,722612267 | 0,800494146  | 0,520765145 | -0,416811483 | 0,162668962  |
| <i>Pole3</i>         | 1,061526179 | -0,511633115 | 0,317507989 | 0,015742615  | 0,489015154  |
| <i>Cdkn1a</i>        | 1,094759675 | 0,050305186  | 0,335483395 | 0,268261068  | 0,633025196  |
| <i>Gpr30</i>         | 1,112599737 | 0,358967786  | 0,497543665 | 0,103119536  | 0,445693884  |
| <i>Podn</i>          | 1,045348283 | 0,279631436  | 0,365008923 | 0,153032239  | 0,503378608  |
| <i>Slc35e4</i>       | 1,086186637 | 0,274689106  | 0,471818792 | -0,140077802 | 0,693469463  |
| <i>Tubb3</i>         | 1,188017024 | 0,256506946  | 0,764889242 | 0,098472736  | 0,963453661  |
| <i>Timm13</i>        | 0,877578418 | 0,031706649  | 0,629180201 | -0,890254333 | 1,007412093  |
| <i>Gnb3</i>          | 1,09136042  | 0,364100946  | 0,511874527 | 0,470210819  | 0,332879142  |
| <i>Rccd1</i>         | 1,245424667 | 0,400894405  | 0,628547632 | 0,386880113  | 0,437181664  |
| <i>Pdcd2l</i>        | 1,000796603 | 0,317249291  | 0,622382544 | 0,499280043  | 0,497347577  |
| <i>1700110C19Rik</i> | 1,038377614 | 0,460871856  | 0,714065662 | 0,452563944  | 0,469752915  |
| <i>C1ql4</i>         | 1,030288054 | 0,016448223  | 0,45244053  | 0,537518147  | 0,550473833  |
| <i>2510003D18Rik</i> | 1,236728078 | 0,470076087  | 0,203126458 | 0,55983281   | 0,76676967   |
| <i>Hist2h3c1</i>     | 1,241734014 | 0,253500536  | 1,161075138 | 0,614409023  | 0,793099877  |
| <i>Mafa</i>          | 1,604625524 | 0,142738752  | 1,1348607   | 0,475788731  | 0,805745574  |
| <i>Ankle1</i>        | 1,182441842 | 0,242709334  | 0,7526657   | 0,634859167  | 0,606153305  |
| <i>BC029214</i>      | 1,223048148 | 0,029473688  | 0,921346824 | 0,787856431  | 0,672761228  |
| <i>Gm6682</i>        | 1,105460037 | 0,137813682  | 0,828402851 | -0,719062401 | 0,476121385  |
| <i>Socs1</i>         | 1,138230795 | 0,22141355   | 0,908243199 | -0,061381652 | 0,61728293   |
| <i>1110017F19Rik</i> | 1,529626644 | 0,242435528  | 0,99881583  | -0,043369589 | 0,402527424  |
| <i>Hrh3</i>          | 1,344896405 | 0,495568116  | 0,715528997 | 0,184480811  | 0,283285916  |
| <i>Mrgprg</i>        | 1,374643371 | 0,356702771  | 0,738680895 | -0,114030252 | 0,341617076  |
| <i>Gzma</i>          | 1,225708835 | 0,547646779  | 0,66175966  | 0,079602792  | 0,321579027  |
| <i>Wnk2</i>          | 1,200766147 | 0,470542622  | 0,570299595 | 0,101514197  | 0,41505025   |
| <i>1700029P11Rik</i> | 1,023556815 | -0,34923827  | 0,672192106 | -0,45136214  | 0,043262992  |
| <i>Lrfn4</i>         | 1,14832188  | 0,555207598  | 0,387451768 | 0,924275182  | 0,98672076   |
| <i>Lrrc45</i>        | 1,007677932 | 0,406781347  | 0,544663756 | 0,845626243  | 1,072234104  |
| <i>Rpp21</i>         | 1,000786213 | 0,554942971  | 0,644783293 | 0,836782856  | 0,835016572  |
| <i>Hoxa7</i>         | 1,067563754 | 0,52991528   | 0,572868378 | 0,84934589   | 0,63328855   |
| <i>Tnnc2</i>         | 1,036350912 | 0,357383864  | 0,641142227 | 0,963921592  | 0,697760287  |

|                      |             |              |              |             |             |
|----------------------|-------------|--------------|--------------|-------------|-------------|
| <i>Prr2</i>          | 1,077623414 | 0,692594414  | 0,788791482  | 0,987776479 | 1,164942838 |
| <i>Z810006K23Rik</i> | 1,052761167 | 0,604157244  | 0,882109913  | 0,904856919 | 1,176847654 |
| <i>Itgam</i>         | 1,180329699 | 0,73201128   | 0,805677792  | 0,855008833 | 1,120341996 |
| <i>Gm3230</i>        | 1,129884697 | 0,391330745  | 0,806668326  | 0,977625529 | 1,119710301 |
| <i>Car11</i>         | 0,880760414 | 0,638962473  | 0,630267453  | 0,92790901  | 1,028706927 |
| <i>Angptl6</i>       | 0,882993409 | 0,568089575  | 0,716512146  | 0,950724481 | 1,010720744 |
| <i>Thoc6</i>         | 1,035749257 | 0,582434714  | 0,780441811  | 1,015474797 | 0,992002245 |
| <i>Crip2</i>         | 1,032585807 | 0,558520751  | 0,712800359  | 1,135710617 | 1,071097808 |
| <i>Tha1</i>          | 1,075619815 | 0,519803181  | 0,711232737  | 1,102028587 | 1,132703612 |
| <i>F2rl2</i>         | 0,982944832 | 0,642221573  | 0,712708618  | 1,12401464  | 1,191990286 |
| <i>Pdf</i>           | 1,518751569 | 0,266030649  | 0,53595834   | 1,116772476 | 1,140043865 |
| <i>Z010001M06Rik</i> | 1,254419661 | 0,120516194  | 0,836515315  | 1,330133242 | 0,909803004 |
| <i>Tusc1</i>         | 1,352648842 | -0,006416271 | -0,021689469 | 0,778884611 | 1,172684926 |

| Cluster 5                           |              |              |             |              |              |
|-------------------------------------|--------------|--------------|-------------|--------------|--------------|
| Intragenic 5hmC (log2 CMS-IP/Input) |              |              |             |              |              |
| Gene symbol                         | DP           | CD4 SP       | CD8 SP      | naïve CD4    | naïve CD8    |
| <i>Npw</i>                          | 0,866460018  | -0,022867889 | 1,582037553 | 0,165103004  | 0,725713275  |
| <i>Tmem107</i>                      | 1,031723714  | 0,278149933  | 1,508816361 | 0,135041594  | 0,942714393  |
| <i>Elof1</i>                        | 0,501393707  | 0,372784311  | 1,60595263  | -0,134218477 | 0,673694912  |
| <i>Tppp2</i>                        | 0,536193238  | 0,732137573  | 1,147221551 | 0,402735721  | 0,342514221  |
| <i>Krt24</i>                        | 0,592458239  | 0,651558582  | 1,01029578  | 0,386591468  | 0,427715643  |
| <i>Lpar6</i>                        | 0,335356745  | 0,23714321   | 1,095218387 | 0,47437323   | 0,309847294  |
| <i>Gm3264</i>                       | -1,50227093  | -0,117780831 | 1,27505239  | -5,049556714 | -0,923851679 |
| <i>Gm10408</i>                      | 0,174226685  | -0,511824    | 1,035391652 | -0,606468875 | -0,602155527 |
| <i>Nkg7</i>                         | -0,224550139 | -0,393087354 | 1,408657061 | -0,666034833 | 0,668145891  |
| <i>Gm10731</i>                      | 0,180213817  | -0,021342598 | 2,556563194 | 0,925175985  | 1,020105087  |
| <i>Gm5071</i>                       | -0,606572773 | 1,801203706  | 3,473033553 | -0,886116132 | -1,188767731 |
| <i>Gm14685</i>                      | -2,379928652 | 0,463008843  | 2,600738363 | -1,780499086 | 0            |

| Cluster 6                           |             |             |             |             |             |
|-------------------------------------|-------------|-------------|-------------|-------------|-------------|
| Intragenic 5hmC (log2 CMS-IP/Input) |             |             |             |             |             |
| Gene symbol                         | DP          | CD4 SP      | CD8 SP      | naïve CD4   | naïve CD8   |
| <i>Sub1</i>                         | 0,469281964 | 1,516062842 | 1,529968245 | 1,394425749 | 1,32337901  |
| <i>Myst4</i>                        | 0,601885195 | 1,442982231 | 1,51028172  | 1,404238992 | 1,364297067 |
| <i>Rbms2</i>                        | 0,649391542 | 1,556734097 | 1,445212009 | 1,26121799  | 1,185220912 |
| <i>Man1a</i>                        | 0,719104312 | 1,307739727 | 1,466202348 | 1,342228501 | 1,486033279 |
| <i>Med7</i>                         | 0,611542001 | 1,240938197 | 1,429804356 | 1,339900202 | 1,454859311 |
| <i>Actr1a</i>                       | 0,696823918 | 1,313549874 | 1,399648259 | 1,255478316 | 1,446605716 |
| <i>Klc1</i>                         | 0,677210487 | 1,316575751 | 1,327090494 | 1,298087731 | 1,450750756 |
| <i>Fkbp11</i>                       | 0,700826723 | 1,392043026 | 1,422826193 | 1,402207069 | 1,360218939 |
| <i>Mrps6</i>                        | 0,674460687 | 1,347720538 | 1,397395936 | 1,300325395 | 1,343873331 |
| <i>Nek7</i>                         | 0,522019015 | 1,31279036  | 1,380187824 | 1,4073177   | 1,484111428 |
| <i>Mapk1</i>                        | 0,488474178 | 1,304842808 | 1,420685425 | 1,354850453 | 1,451792552 |
| <i>Tet1</i>                         | 0,539719687 | 1,377120186 | 1,474466009 | 1,413334259 | 1,47809019  |
| <i>Ppm1a</i>                        | 0,587020672 | 1,266109774 | 1,341693403 | 1,374642435 | 1,493619171 |
| <i>Reps1</i>                        | 0,546693377 | 1,289357646 | 1,310144258 | 1,395435934 | 1,439953065 |
| <i>Mat2a</i>                        | 0,562401381 | 1,227478584 | 1,359879742 | 1,388810122 | 1,321880417 |
| <i>Mynn</i>                         | 0,545302707 | 1,232384925 | 1,444708624 | 1,326463342 | 1,286759983 |
| <i>Myeov2</i>                       | 0,487348691 | 1,500921712 | 1,186516486 | 1,649038353 | 1,169433664 |
| <i>Ap2a2</i>                        | 0,413869178 | 1,492888398 | 1,232393497 | 1,635887851 | 1,275708222 |

|                      |             |             |             |             |             |
|----------------------|-------------|-------------|-------------|-------------|-------------|
| <i>Gm11981</i>       | 0,587032411 | 1,4201671   | 1,144041484 | 1,73850139  | 1,241331943 |
| <i>Znr1</i>          | 0,718048662 | 1,43792884  | 1,346727234 | 1,722730956 | 1,257144455 |
| <i>Rab1b</i>         | 0,736874362 | 1,429638374 | 1,313253175 | 1,637476115 | 1,209841387 |
| <i>Zer1</i>          | 0,600965097 | 1,480058789 | 1,287023216 | 1,451205309 | 1,440188782 |
| <i>Rnf122</i>        | 0,609522332 | 1,447490065 | 1,295285753 | 1,485693712 | 1,43265569  |
| <i>Ext1</i>          | 0,639762659 | 1,532241644 | 1,365835015 | 1,479156691 | 1,33262286  |
| <i>Ppa2</i>          | 0,613464132 | 1,422830404 | 1,245181169 | 1,453287849 | 1,294884199 |
| <i>Zcchc10</i>       | 0,788171067 | 1,545982926 | 1,105816969 | 1,43169441  | 1,326628103 |
| <i>Tmem154</i>       | 0,920442505 | 1,535303395 | 1,440441012 | 1,383339448 | 1,306364542 |
| <i>Stim2</i>         | 0,914356273 | 1,508926466 | 1,479592556 | 1,376809235 | 1,40257689  |
| <i>Rbm4b</i>         | 0,765167974 | 1,487920852 | 1,429152639 | 1,44411406  | 1,253301208 |
| <i>Ccdc109a</i>      | 0,958647551 | 1,496370301 | 1,253464444 | 1,384935386 | 1,149539887 |
| <i>Mical3</i>        | 1,053458685 | 1,597151686 | 1,344374123 | 1,499293774 | 1,201097406 |
| <i>Ccrl2</i>         | 1,026089195 | 1,386649875 | 1,297603177 | 1,425843597 | 1,240385543 |
| <i>Tbc1d30</i>       | 1,037400687 | 1,398039307 | 1,304379613 | 1,589053642 | 1,252898171 |
| <i>Arl8a</i>         | 0,921986019 | 1,263555805 | 1,239063328 | 1,472519827 | 1,221789657 |
| <i>Ip6k2</i>         | 0,915108051 | 1,623399061 | 1,233414741 | 1,225948756 | 1,341400039 |
| <i>Wfikkn1</i>       | 1,051331376 | 1,508469576 | 1,243627079 | 1,214721189 | 1,406178608 |
| <i>1700020M21Rik</i> | 0,868499191 | 1,481469313 | 1,393570172 | 1,137403734 | 1,271501993 |
| <i>Cry1</i>          | 0,960249338 | 1,459604902 | 1,384762445 | 1,184732844 | 1,30676361  |
| <i>Il12rb2</i>       | 0,863006765 | 1,426069294 | 1,430588747 | 1,196532289 | 1,36765694  |
| <i>Il10ra</i>        | 0,762292122 | 1,72062392  | 1,406366535 | 1,584358733 | 1,35371184  |
| <i>5730419I09Rik</i> | 0,776908138 | 1,603506327 | 1,365083886 | 1,601804882 | 1,295393263 |
| <i>Tspan32</i>       | 0,951583522 | 1,586475838 | 1,423399179 | 1,555875625 | 1,411577288 |
| <i>Gsdmd</i>         | 0,887019315 | 1,62672637  | 1,33263729  | 1,524790747 | 1,475448006 |
| <i>Fam136a</i>       | 0,961872175 | 1,753508428 | 1,244602232 | 1,521344877 | 1,260496364 |
| <i>Rgs2</i>          | 1,007950624 | 1,737461171 | 1,317813886 | 1,629076473 | 1,294527222 |
| <i>Bzw2</i>          | 0,931875549 | 1,684650624 | 1,56211407  | 1,492121917 | 1,412163623 |
| <i>Sall2</i>         | 0,922214924 | 1,779571002 | 1,455703267 | 1,508191309 | 1,370250581 |
| <i>RbmX</i>          | 1,109613044 | 1,723603076 | 1,363803017 | 1,427691111 | 1,452912965 |
| <i>Bri3</i>          | 0,63422418  | 1,353964417 | 1,122761017 | 1,83422207  | 1,452415476 |
| <i>Pygo2</i>         | 0,851137704 | 1,499171232 | 1,191020651 | 1,80214076  | 1,470233341 |
| <i>Vipr1</i>         | 0,76083124  | 1,284477745 | 1,122447632 | 1,751200226 | 1,615563054 |
| <i>Gm15008</i>       | 0,87419901  | 1,402404952 | 1,162060459 | 1,756970105 | 1,682877365 |
| <i>Fermt3</i>        | 0,814361273 | 1,181640939 | 1,288610623 | 1,609000305 | 1,481105767 |
| <i>Vhl</i>           | 0,885354861 | 1,277442818 | 1,317423273 | 1,645907661 | 1,399448787 |
| <i>Izumo1</i>        | 0,847032551 | 1,223604365 | 1,303645633 | 1,799783415 | 1,315860186 |
| <i>Slc41a3</i>       | 0,801224818 | 1,42300489  | 1,451536339 | 1,518754215 | 1,568551045 |
| <i>Stub1</i>         | 0,784024052 | 1,410321735 | 1,417488912 | 1,532997587 | 1,497496942 |
| <i>Psip1</i>         | 0,701234069 | 1,328254109 | 1,479034092 | 1,487479181 | 1,529743135 |
| <i>Casc3</i>         | 0,892946146 | 1,319188398 | 1,492765886 | 1,565052257 | 1,564034384 |
| <i>Batf</i>          | 0,877323375 | 1,310731838 | 1,449318188 | 1,601318481 | 1,580323889 |
| <i>Trappc6b</i>      | 0,873308454 | 1,342895713 | 1,484156834 | 1,534982751 | 1,650286939 |
| <i>Sdcbp</i>         | 0,640799751 | 1,251239802 | 1,54004926  | 1,455738756 | 1,588919486 |
| <i>Rnf10</i>         | 0,68159816  | 1,233059985 | 1,491808138 | 1,438011875 | 1,65182345  |
| <i>Serinc4</i>       | 0,658684423 | 1,205327327 | 1,542433616 | 1,581122249 | 1,534643087 |
| <i>Fubp1</i>         | 0,512194065 | 1,451939444 | 1,483584072 | 1,681285148 | 1,528512229 |
| <i>Vrk1</i>          | 0,528779224 | 1,532987202 | 1,440877709 | 1,633742116 | 1,528782862 |
| <i>Mapkapk3</i>      | 0,586027514 | 1,41543877  | 1,338090602 | 1,632331707 | 1,455707812 |
| <i>Pgrmc2</i>        | 0,586284587 | 1,412719945 | 1,261009019 | 1,660625746 | 1,422494869 |
| <i>Ddit3</i>         | 0,692360316 | 1,557871767 | 1,395796132 | 1,53747683  | 1,485658674 |

|                      |             |             |             |             |             |
|----------------------|-------------|-------------|-------------|-------------|-------------|
| <i>Klhl6</i>         | 0,596941591 | 1,567385431 | 1,326317724 | 1,607015519 | 1,503031902 |
| <i>Atp2b1</i>        | 0,498077735 | 1,453642428 | 1,499813976 | 1,486570954 | 1,648841582 |
| <i>Raly</i>          | 0,484564981 | 1,410405543 | 1,555346307 | 1,459583667 | 1,635287221 |
| <i>Eif4b</i>         | 0,49991054  | 1,352539169 | 1,572145193 | 1,498484131 | 1,684314925 |
| <i>Srrm1</i>         | 0,501282772 | 1,374223534 | 1,503747659 | 1,494158039 | 1,604499394 |
| <i>Kcmf1</i>         | 0,524003643 | 1,312625274 | 1,473043064 | 1,532479729 | 1,580846695 |
| <i>Bclaf1</i>        | 0,467878709 | 1,363620671 | 1,474869066 | 1,500188889 | 1,699456346 |
| <i>Csnk1d</i>        | 0,500077397 | 1,368101491 | 1,448544677 | 1,426543095 | 1,698978278 |
| <i>Stxbp3a</i>       | 0,5462176   | 1,3701809   | 1,396135923 | 1,473300725 | 1,663426745 |
| <i>Rbx1</i>          | 0,559913073 | 1,277727042 | 1,477830065 | 1,460034798 | 1,727301568 |
| <i>Mtif3</i>         | 0,554622583 | 1,368816992 | 1,413419283 | 1,546355553 | 1,708896031 |
| <i>Add1</i>          | 0,570112576 | 1,31090958  | 1,360387838 | 1,56829415  | 1,693829786 |
| <i>Hnrnpul2</i>      | 0,501088775 | 1,260655939 | 1,457395083 | 1,604078121 | 1,705318069 |
| <i>Zfp592</i>        | 0,686735641 | 1,439046794 | 1,425227138 | 1,520371168 | 1,643021894 |
| <i>Plagl2</i>        | 0,659899358 | 1,471055968 | 1,448492918 | 1,485563945 | 1,648840038 |
| <i>Sp1</i>           | 0,530003588 | 1,485412733 | 1,374413504 | 1,533523384 | 1,633264094 |
| <i>Nab1</i>          | 0,525373335 | 1,51297052  | 1,503904567 | 1,546650854 | 1,684158342 |
| <i>Mex3c</i>         | 0,565675173 | 1,54471392  | 1,556747687 | 1,538424407 | 1,591457138 |
| <i>C430048L16Rik</i> | 0,520567387 | 1,356979464 | 1,365330794 | 1,309370855 | 1,58173725  |
| <i>Lrch3</i>         | 0,561365336 | 1,355716112 | 1,422294032 | 1,33518798  | 1,635122628 |
| <i>Trim13</i>        | 0,574722408 | 1,467649411 | 1,360223767 | 1,3574895   | 1,658290222 |
| <i>Dnmt3a</i>        | 0,667364696 | 1,29414767  | 1,662017748 | 1,323096211 | 1,659786096 |
| <i>Ilf3</i>          | 0,671639523 | 1,369828485 | 1,662080587 | 1,364839483 | 1,602646983 |
| <i>Chic2</i>         | 0,558574133 | 1,340318776 | 1,630733251 | 1,338728702 | 1,649859652 |
| <i>Creb1</i>         | 0,704349647 | 1,344355221 | 1,497998837 | 1,339079907 | 1,605288011 |
| <i>Gnai3</i>         | 0,690685907 | 1,335120839 | 1,497155738 | 1,332335054 | 1,578973624 |
| <i>Gnb1</i>          | 0,702367574 | 1,430889278 | 1,522111041 | 1,322829459 | 1,515999572 |
| <i>Pttg1ip</i>       | 0,8066947   | 1,389808091 | 1,46236482  | 1,411651726 | 1,640476603 |
| <i>Cnot3</i>         | 0,74398291  | 1,328886299 | 1,425938193 | 1,408704167 | 1,676688591 |
| <i>Lman2</i>         | 0,781702474 | 1,333678453 | 1,462476579 | 1,458581698 | 1,741508051 |
| <i>Fbxo28</i>        | 0,782165184 | 1,313809851 | 1,493737732 | 1,427966575 | 1,745750314 |
| <i>Vps37c</i>        | 0,771659114 | 1,291111261 | 1,484288509 | 1,473991491 | 1,66646627  |
| <i>Sf3b2</i>         | 0,711760662 | 1,369890881 | 1,494430923 | 1,46066992  | 1,669160544 |
| <i>Acap2</i>         | 0,708319458 | 1,393435272 | 1,496178602 | 1,423620906 | 1,731443713 |
| <i>Crk</i>           | 0,715984129 | 1,313058833 | 1,529509903 | 1,408046669 | 1,702481267 |
| <i>Wbp7</i>          | 0,619792622 | 1,357185796 | 1,551349114 | 1,440362897 | 1,670390991 |
| <i>Kras</i>          | 0,551705672 | 1,312610153 | 1,190692601 | 1,401678468 | 1,390855864 |
| <i>Mxd1</i>          | 0,556101977 | 1,322569897 | 1,238173338 | 1,389761071 | 1,471326472 |
| <i>Pgap2</i>         | 0,571524435 | 1,271391162 | 1,149884887 | 1,260843284 | 1,492742857 |
| <i>2010109K11Rik</i> | 0,54390897  | 1,329594124 | 1,304494756 | 1,281969871 | 1,458663387 |
| <i>1700012D14Rik</i> | 0,466036778 | 1,377705455 | 1,294567612 | 1,258143831 | 1,434729167 |
| <i>Chchd8</i>        | 0,4762895   | 1,338746448 | 1,24077014  | 1,272153151 | 1,514334116 |
| <i>Ypel5</i>         | 0,457089054 | 1,190056907 | 1,339220988 | 1,439691046 | 1,531741052 |
| <i>Usp15</i>         | 0,48236092  | 1,244509494 | 1,376753984 | 1,386907576 | 1,533053278 |
| <i>Slc26a2</i>       | 0,507705764 | 1,267028836 | 1,32880598  | 1,390853616 | 1,62767891  |
| <i>Mzt1</i>          | 0,526251874 | 1,263028037 | 1,334038435 | 1,471637382 | 1,607583999 |
| <i>Cox17</i>         | 0,572618795 | 1,213182379 | 1,267500071 | 1,317146148 | 1,582732033 |
| <i>Dock8</i>         | 0,551867659 | 1,208608976 | 1,29973972  | 1,355617931 | 1,520985762 |
| <i>Hectd1</i>        | 0,512386111 | 1,190862384 | 1,296942698 | 1,3087093   | 1,593677246 |
| <i>Cdc37</i>         | 0,495695221 | 1,151702435 | 1,258353577 | 1,336771275 | 1,592582366 |
| <i>Gm1332</i>        | 0,386606031 | 1,406609287 | 1,141006762 | 1,543423144 | 1,602655066 |

|                      |             |             |             |             |             |
|----------------------|-------------|-------------|-------------|-------------|-------------|
| <i>Romo1</i>         | 0,324205119 | 1,307925574 | 1,107347223 | 1,423087829 | 1,677123426 |
| <i>Arid4a</i>        | 0,577684774 | 1,229397618 | 1,381263186 | 1,496962265 | 1,6178029   |
| <i>Rbms1</i>         | 0,587337183 | 1,23278209  | 1,346979451 | 1,44293208  | 1,659197691 |
| <i>Bag6</i>          | 0,639916724 | 1,28864985  | 1,285475127 | 1,495407561 | 1,616770951 |
| <i>B430306N03Rik</i> | 0,560287594 | 1,248265632 | 1,306345418 | 1,587027718 | 1,667001854 |
| <i>Gatc</i>          | 0,595353075 | 1,32867572  | 1,311526444 | 1,512981421 | 1,469722822 |
| <i>Txk</i>           | 0,581987304 | 1,269280195 | 1,29865192  | 1,49567096  | 1,484096557 |
| <i>Ctdnep1</i>       | 0,583874933 | 1,310245483 | 1,312152254 | 1,450405816 | 1,508861059 |
| <i>Fbxo33</i>        | 0,566943219 | 1,312696471 | 1,397145336 | 1,563897972 | 1,520782463 |
| <i>Tead2</i>         | 0,641196294 | 1,201483982 | 1,323834959 | 1,390486651 | 1,542418085 |
| <i>Atf1</i>          | 0,610385299 | 1,220485229 | 1,287579052 | 1,41404179  | 1,544695946 |
| <i>Txn14a</i>        | 0,620512711 | 1,222837316 | 1,322132083 | 1,467790918 | 1,565619755 |
| <i>Spnb2</i>         | 0,653271326 | 1,159377754 | 1,341909379 | 1,496658699 | 1,519347493 |
| <i>Mpv17l2</i>       | 0,646076378 | 1,384185657 | 1,149435412 | 1,607277127 | 1,484388412 |
| <i>Snx21</i>         | 0,63096686  | 1,199414673 | 1,124432742 | 1,555153522 | 1,513091965 |
| <i>Ccni</i>          | 0,348550433 | 1,274507153 | 1,466351644 | 1,429473073 | 1,499866003 |
| <i>Dhx15</i>         | 0,313876716 | 1,208120628 | 1,470547022 | 1,405855638 | 1,573825114 |
| <i>Rsrc2</i>         | 0,316912793 | 1,325791793 | 1,403851573 | 1,402811815 | 1,652786404 |
| <i>Scaf8</i>         | 0,378572197 | 1,291083675 | 1,464058024 | 1,438107333 | 1,616014619 |
| <i>Slc2a1</i>        | 0,44751366  | 1,269878122 | 1,394274407 | 1,46765884  | 1,707727458 |
| <i>Poldip3</i>       | 0,436931209 | 1,294371816 | 1,359237072 | 1,391842393 | 1,686774206 |
| <i>Mll5</i>          | 0,416307871 | 1,277133465 | 1,393637703 | 1,542433462 | 1,665231985 |
| <i>Gdi2</i>          | 0,441848546 | 1,315462667 | 1,372816048 | 1,530496928 | 1,642799728 |
| <i>Ubl3</i>          | 0,400324962 | 1,316915831 | 1,359140527 | 1,4928222   | 1,677567564 |
| <i>Ctss</i>          | 0,380696419 | 1,211263722 | 1,292413646 | 1,535123433 | 1,506320678 |
| <i>Morc3</i>         | 0,334035346 | 1,183200991 | 1,398933056 | 1,517400926 | 1,616806436 |
| <i>Bbip1</i>         | 0,413726374 | 1,207519208 | 1,279161475 | 1,649106026 | 1,624846822 |
| <i>Pomp</i>          | 0,426066825 | 1,513431995 | 1,224074658 | 1,407635673 | 1,498566848 |
| <i>Cab39</i>         | 0,438836749 | 1,476588135 | 1,399774645 | 1,411870299 | 1,499696291 |
| <i>Xpo6</i>          | 0,389077468 | 1,327123913 | 1,32787026  | 1,440831815 | 1,447664861 |
| <i>Rprd2</i>         | 0,409047755 | 1,332524926 | 1,380273979 | 1,441987618 | 1,450563421 |
| <i>Suv420h1</i>      | 0,448748296 | 1,305846617 | 1,344273957 | 1,345819104 | 1,411429033 |
| <i>Pdia3</i>         | 0,323726109 | 1,320993515 | 1,329581774 | 1,44359491  | 1,334049769 |
| <i>Ptplad1</i>       | 0,368468207 | 1,351169952 | 1,327765555 | 1,420651569 | 1,318882639 |
| <i>Psm3</i>          | 0,600908371 | 1,226850176 | 1,404956473 | 1,300511061 | 1,758060728 |
| <i>Tcp11l2</i>       | 0,614806071 | 1,135528248 | 1,415109665 | 1,254185579 | 1,748815399 |
| <i>Snrpd1</i>        | 0,548910677 | 1,131293835 | 1,514213989 | 1,328821878 | 1,699882254 |
| <i>Tmub2</i>         | 0,474294167 | 1,140205919 | 1,429625747 | 1,177062654 | 1,764608339 |
| <i>Pde12</i>         | 0,472414318 | 1,102697381 | 1,379629066 | 1,284685201 | 1,730167412 |
| <i>2010107H07Rik</i> | 0,59222735  | 1,138106723 | 1,417400284 | 1,190758754 | 1,603456449 |
| <i>Akirin2</i>       | 0,53609459  | 1,126119896 | 1,39370552  | 1,220931922 | 1,557862654 |
| <i>Nck1</i>          | 0,56371481  | 1,149005265 | 1,431197436 | 1,277536229 | 1,601114211 |
| <i>Ube2r2</i>        | 0,496788946 | 1,213652299 | 1,458361588 | 1,328185184 | 1,567238654 |
| <i>Gba2</i>          | 0,533896481 | 1,278247486 | 1,443221295 | 1,283977916 | 1,555963799 |
| <i>Ube2i</i>         | 0,610829903 | 1,256363432 | 1,574260705 | 1,152839933 | 1,707897371 |
| <i>1810026J23Rik</i> | 0,65337064  | 1,228440677 | 1,652537823 | 1,140938033 | 1,592227251 |
| <i>Reep2</i>         | 0,590540886 | 1,29049295  | 1,442936858 | 1,004094078 | 1,657756466 |
| <i>Dedd</i>          | 0,546664094 | 1,243258779 | 1,268028644 | 1,11686898  | 1,472283341 |
| <i>Tex261</i>        | 0,553507461 | 1,266836997 | 1,32885423  | 1,111971409 | 1,552988024 |
| <i>Lrrc58</i>        | 0,45457672  | 1,208819562 | 1,343512275 | 1,184063355 | 1,47060125  |
| <i>Sfxn3</i>         | 0,597534657 | 1,199929456 | 1,242373145 | 1,23266962  | 1,427941165 |

|                      |             |             |             |             |             |
|----------------------|-------------|-------------|-------------|-------------|-------------|
| <i>Bdh1</i>          | 0,626131905 | 1,238177418 | 1,273064289 | 1,232999526 | 1,462361021 |
| <i>Snx5</i>          | 0,6825585   | 1,17415084  | 1,268794143 | 1,269568318 | 1,459991752 |
| <i>Nmt1</i>          | 0,594860094 | 1,193547304 | 1,371340069 | 1,241889378 | 1,492491677 |
| <i>Gsk3b</i>         | 0,611494428 | 1,190310254 | 1,373617472 | 1,235574309 | 1,39978652  |
| <i>Csrnp2</i>        | 0,708691246 | 1,221423894 | 1,326695889 | 1,195316815 | 1,429947984 |
| <i>Tbpl1</i>         | 0,643475813 | 1,206098127 | 1,326069944 | 1,18568082  | 1,424350165 |
| <i>Axl</i>           | 0,788896895 | 1,143265967 | 1,464726721 | 1,118321651 | 1,402693703 |
| <i>Mosc2</i>         | 0,795767829 | 1,134271802 | 1,441608742 | 1,219623862 | 1,428418232 |
| <i>D930015E06Rik</i> | 0,794218055 | 1,212255815 | 1,514465542 | 1,133969867 | 1,494750618 |
| <i>Prrc2c</i>        | 0,689108094 | 1,25293779  | 1,438244895 | 1,233616311 | 1,491782821 |
| <i>Dip2b</i>         | 0,736088091 | 1,22264988  | 1,395262243 | 1,163858159 | 1,43379362  |
| <i>Ing4</i>          | 0,740827135 | 1,211591543 | 1,366022896 | 1,143188887 | 1,564664853 |
| <i>Map4k1</i>        | 0,692306089 | 1,202301686 | 1,399522833 | 1,108460352 | 1,499707574 |
| <i>Ndufa4l2</i>      | 0,711172453 | 0,908731193 | 1,382925223 | 1,485951054 | 1,521644498 |
| <i>4930507D05Rik</i> | 0,755204287 | 0,902267896 | 1,311809679 | 1,573009209 | 1,421935333 |
| <i>1700123O20Rik</i> | 0,80984544  | 1,019945611 | 1,391827294 | 1,484410822 | 1,366737705 |
| <i>Prr3</i>          | 0,675630869 | 0,959778903 | 1,223053813 | 1,414649146 | 1,474739499 |
| <i>Usf2</i>          | 0,621532124 | 1,026234525 | 1,240573607 | 1,399353115 | 1,458643268 |
| <i>Ttc36</i>         | 0,737556974 | 0,914520662 | 1,243629838 | 1,408912267 | 1,387268135 |
| <i>Polr2d</i>        | 0,756852174 | 0,944177115 | 1,264848599 | 1,400839312 | 1,384860114 |
| <i>Rps7</i>          | 0,57979749  | 1,038396342 | 1,38453165  | 1,404735126 | 1,554207977 |
| <i>Cebpg</i>         | 0,566525603 | 1,072791464 | 1,312588714 | 1,410441391 | 1,569493257 |
| <i>Stk11</i>         | 0,690455346 | 1,020677815 | 1,361500033 | 1,354558379 | 1,476341775 |
| <i>2410003K15Rik</i> | 0,698775404 | 1,008135097 | 1,383552622 | 1,36220359  | 1,4810695   |
| <i>Ccnt1</i>         | 0,54360432  | 1,136443572 | 1,4632822   | 1,366875098 | 1,496655864 |
| <i>Dnajc8</i>        | 0,615790593 | 1,15160169  | 1,440387963 | 1,332968521 | 1,463551516 |
| <i>Sumo3</i>         | 0,615569442 | 1,060032116 | 1,466206214 | 1,458483667 | 1,4256095   |
| <i>9430008C03Rik</i> | 0,67981495  | 0,850480283 | 1,34533596  | 1,348809298 | 1,653346828 |
| <i>2310044H10Rik</i> | 0,705355404 | 0,876506013 | 1,221568783 | 1,294394738 | 1,672922159 |
| <i>Tmed2</i>         | 0,538503872 | 0,812639437 | 1,313089433 | 1,333572582 | 1,533281519 |
| <i>Ovca2</i>         | 0,601753251 | 0,794471807 | 1,322854815 | 1,43936749  | 1,577233169 |
| <i>Sbds</i>          | 0,617398754 | 1,110581352 | 1,277372156 | 1,303862869 | 1,373614212 |
| <i>Ppp6r3</i>        | 0,564321441 | 1,104426355 | 1,308826557 | 1,224011303 | 1,326845656 |
| <i>Scaf4</i>         | 0,528955076 | 1,140868372 | 1,240361087 | 1,269355377 | 1,422757472 |
| <i>Stx16</i>         | 0,499646941 | 1,165617892 | 1,226317624 | 1,260714014 | 1,376878492 |
| <i>Vdac2</i>         | 0,579421495 | 1,165689958 | 1,211887815 | 1,282347442 | 1,398232671 |
| <i>N4bp1</i>         | 0,529553357 | 1,08475641  | 1,261782843 | 1,371775892 | 1,351497347 |
| <i>Rabepk</i>        | 0,49383783  | 1,039372505 | 1,264206973 | 1,317534422 | 1,416384945 |
| <i>Klhl2</i>         | 0,40709106  | 1,205342373 | 1,194098638 | 1,302976701 | 1,383708855 |
| <i>Asap1</i>         | 0,461679634 | 1,253226398 | 1,236680617 | 1,354335408 | 1,393761219 |
| <i>2400003C14Rik</i> | 0,449997308 | 1,156349519 | 1,220345244 | 1,320215542 | 1,305795126 |
| <i>Heca</i>          | 0,440903731 | 1,160799422 | 1,278718695 | 1,401646945 | 1,406861896 |
| <i>Zfp1</i>          | 0,577905902 | 1,027702566 | 1,284162006 | 1,260099509 | 1,293104808 |
| <i>Zfp748</i>        | 0,564184275 | 1,022343349 | 1,260980959 | 1,264214678 | 1,354628106 |
| <i>Phf12</i>         | 0,516751311 | 1,035891422 | 1,240938292 | 1,196318666 | 1,312026404 |
| <i>Vapb</i>          | 0,55184983  | 1,052367462 | 1,251504299 | 1,193778389 | 1,299333302 |
| <i>Zfp212</i>        | 0,47618303  | 1,014868341 | 1,362910942 | 1,281826241 | 1,284001851 |
| <i>Smarca2</i>       | 0,517386135 | 1,130203074 | 1,300954132 | 1,169914485 | 1,412797514 |
| <i>Tsr1</i>          | 0,57898789  | 1,098590858 | 1,342799324 | 1,225496726 | 1,427370183 |
| <i>Kansl1</i>        | 0,467346961 | 1,13876447  | 1,332197552 | 1,29658287  | 1,382985409 |
| <i>Zfp148</i>        | 0,46419501  | 1,151492314 | 1,342094285 | 1,269519856 | 1,398147094 |

|                      |              |             |             |             |             |
|----------------------|--------------|-------------|-------------|-------------|-------------|
| <i>Snopc3</i>        | 0,506020709  | 1,118873736 | 1,343576055 | 1,290752314 | 1,359710992 |
| <i>Z810002N01Rik</i> | 0,600991517  | 0,987215917 | 1,206840945 | 1,310460356 | 1,406478802 |
| <i>Nfya</i>          | 0,579340943  | 1,065442044 | 1,188842612 | 1,303010684 | 1,400711108 |
| <i>Eif4g1</i>        | 0,687940004  | 1,047016482 | 1,140020211 | 1,371688572 | 1,383094883 |
| <i>Mdh2</i>          | 0,569765652  | 1,065893832 | 1,185736213 | 1,359109755 | 1,245240045 |
| <i>Nrbp1</i>         | 0,578251825  | 1,03288163  | 1,137180509 | 1,32497911  | 1,276083898 |
| <i>Kat2b</i>         | 0,591704239  | 1,093805851 | 1,114574182 | 1,319362503 | 1,339093623 |
| <i>Nup50</i>         | 0,453170886  | 1,034219519 | 1,228815379 | 1,311901458 | 1,55233212  |
| <i>Tmed10</i>        | 0,496794071  | 1,108548074 | 1,242135297 | 1,352266731 | 1,545543625 |
| <i>Twf1</i>          | 0,445959106  | 1,099058058 | 1,191629221 | 1,414251141 | 1,519494323 |
| <i>Nufip2</i>        | 0,372471994  | 1,109102346 | 1,338901506 | 1,373700091 | 1,516033813 |
| <i>Akap8</i>         | 0,381835115  | 1,088370603 | 1,315841548 | 1,355646747 | 1,548690335 |
| <i>Epn1</i>          | 0,538854146  | 0,98857867  | 1,277283032 | 1,367497501 | 1,486899469 |
| <i>Ntan1</i>         | 0,459514941  | 0,964755084 | 1,219804177 | 1,387919332 | 1,464386502 |
| <i>Atp6v0e</i>       | 0,481728841  | 1,053927749 | 1,103470426 | 1,334364089 | 1,417237563 |
| <i>Cmas</i>          | 0,497991918  | 1,077387612 | 1,168196326 | 1,274562474 | 1,388717441 |
| <i>Btbd1</i>         | 0,436938686  | 1,058671304 | 1,119524151 | 1,212986878 | 1,475695349 |
| <i>Stim1</i>         | 0,467012199  | 1,063940852 | 1,135930731 | 1,281750705 | 1,524601297 |
| <i>Trim12c</i>       | 0,440733811  | 1,027541678 | 1,214862525 | 1,224467103 | 1,382119617 |
| <i>Nrbf2</i>         | 0,501704175  | 1,026809435 | 1,229848786 | 1,2206901   | 1,418354677 |
| <i>Whsc1l1</i>       | 0,485334315  | 1,063045139 | 1,09960621  | 1,399527296 | 1,572784841 |
| <i>Polr3c</i>        | 0,549556915  | 0,987729139 | 1,146561802 | 1,361534046 | 1,598639951 |
| <i>Zdhhc20</i>       | 0,442866901  | 1,056715029 | 1,161442228 | 1,392894881 | 1,592850438 |
| <i>Zfp84</i>         | 0,431528712  | 1,015507816 | 1,215815151 | 1,400486607 | 1,626049972 |
| <i>Pprc1</i>         | 0,512552877  | 1,08737729  | 1,204722044 | 1,430053876 | 1,814439275 |
| <i>Puf60</i>         | 0,568851405  | 1,071036484 | 1,241678554 | 1,394237313 | 1,818317749 |
| <i>Snx4</i>          | 0,526490658  | 1,147950866 | 1,264296691 | 1,447470153 | 1,804404117 |
| <i>Rpl11</i>         | 0,584516728  | 1,109700331 | 1,240012264 | 1,331784641 | 1,863413063 |
| <i>Idnk</i>          | 0,537239618  | 1,26027786  | 1,24977098  | 1,268960135 | 1,798431575 |
| <i>Eif3b</i>         | 0,511394537  | 0,946556984 | 1,402609683 | 1,239497578 | 1,759352997 |
| <i>Bop1</i>          | 0,621924579  | 1,001706524 | 1,272441467 | 1,190340931 | 1,796418657 |
| <i>Lax1</i>          | 0,512323807  | 0,970915108 | 1,257496161 | 1,351910652 | 1,813492869 |
| <i>Ppp1r12c</i>      | 0,721887996  | 1,092852634 | 1,388996989 | 1,381582103 | 1,660928085 |
| <i>Taf8</i>          | 0,740305253  | 1,094822932 | 1,486228412 | 1,415538392 | 1,63989476  |
| <i>Hnrnpd</i>        | 0,678789203  | 1,123576132 | 1,424861654 | 1,382970312 | 1,549914349 |
| <i>Ubqln2</i>        | 0,66344988   | 1,073640451 | 1,440478673 | 1,387367729 | 1,752553032 |
| <i>Pde6h</i>         | 0,657002754  | 1,082706503 | 1,51698552  | 1,359840932 | 1,699172109 |
| <i>Atxn7l3b</i>      | 0,651874854  | 1,0614238   | 1,303502809 | 1,26306346  | 1,605828068 |
| <i>Gosr1</i>         | 0,70461224   | 1,11029852  | 1,331664053 | 1,269280761 | 1,71529975  |
| <i>Capn1</i>         | 0,574112468  | 1,136626196 | 1,304849147 | 1,403360832 | 1,629183527 |
| <i>Ppm1g</i>         | 0,63680078   | 1,186031966 | 1,32446813  | 1,363780895 | 1,698763245 |
| <i>Raf1</i>          | 0,731874129  | 1,165919693 | 1,313456642 | 1,213486374 | 1,546793755 |
| <i>Oasl1</i>         | 0,76854565   | 1,153518434 | 1,37739847  | 1,208585801 | 1,556639857 |
| <i>Sec24c</i>        | 0,7111013435 | 1,171860974 | 1,329020828 | 1,27351164  | 1,609459754 |
| <i>Ndst2</i>         | 0,833721369  | 1,100411534 | 1,351361208 | 1,203460578 | 1,660098381 |
| <i>Lmf2</i>          | 0,858561848  | 1,168441869 | 1,317076629 | 1,24529284  | 1,681332779 |
| <i>Fam120a</i>       | 0,759840606  | 1,226939079 | 1,389363794 | 1,310284549 | 1,558990306 |
| <i>Olfir56</i>       | 0,746599021  | 1,184146555 | 1,410833007 | 1,294628049 | 1,620691761 |
| <i>Fbxo21</i>        | 0,804575309  | 1,177920506 | 1,38588968  | 1,364546746 | 1,58616204  |
| <i>Sbno2</i>         | 0,807454666  | 1,161745367 | 1,312321858 | 1,382145135 | 1,661271862 |
| <i>Pgam1</i>         | 0,773380842  | 1,211386676 | 1,307423531 | 1,342901762 | 1,697804502 |



|                      |             |             |             |             |             |
|----------------------|-------------|-------------|-------------|-------------|-------------|
| <i>Fau</i>           | 0,41813159  | 1,53630033  | 1,271407473 | 0,933874011 | 1,72420006  |
| <i>Rbm12b</i>        | 0,37243345  | 1,617768456 | 1,187480286 | 1,158390211 | 1,799811163 |
| <i>Klhdc4</i>        | 0,425273161 | 1,639379954 | 0,576752548 | 1,263640421 | 1,674755908 |
| <i>Rps29</i>         | 0,876106715 | 1,441987218 | 1,076558999 | 1,353634675 | 1,876180679 |
| <i>Gm19710</i>       | 0,987054035 | 1,549656595 | 1,156008903 | 1,480786706 | 1,813558907 |
| <i>Kbtbd7</i>        | 0,958253996 | 1,640160497 | 0,687012074 | 1,236890095 | 1,841175216 |
| <i>Trp53inp1</i>     | 0,896000237 | 1,269865551 | 1,369614522 | 1,192568172 | 1,203305847 |
| <i>Mad2l1</i>        | 0,871110915 | 1,256883489 | 1,359422774 | 1,110012093 | 1,223502423 |
| <i>Gsg1</i>          | 0,880786969 | 1,283893577 | 1,374784658 | 1,029787613 | 1,147371496 |
| <i>Ublcp1</i>        | 0,849791394 | 1,246041998 | 1,207291011 | 1,107227724 | 1,197821089 |
| <i>Osbpl11</i>       | 0,897720082 | 1,210752571 | 1,230991804 | 1,085232383 | 1,168051948 |
| <i>Inpp1</i>         | 0,87292758  | 1,333378053 | 1,249563445 | 1,07277131  | 1,105779578 |
| <i>Tmc4</i>          | 0,943125767 | 1,306155398 | 1,34477174  | 1,261326869 | 1,235226747 |
| <i>Sertad2</i>       | 0,96557894  | 1,269850439 | 1,311688197 | 1,247711685 | 1,279548371 |
| <i>Mfsd2a</i>        | 0,977372958 | 1,303768882 | 1,305394594 | 1,281742497 | 1,183079336 |
| <i>Usp6nl</i>        | 0,72416437  | 1,36419786  | 1,278705502 | 1,229550433 | 1,226554281 |
| <i>Rab22a</i>        | 0,743315825 | 1,382579321 | 1,312972962 | 1,275002618 | 1,269580119 |
| <i>Fbxw11</i>        | 0,807747725 | 1,30513036  | 1,353642009 | 1,248731517 | 1,26416923  |
| <i>Utp11l</i>        | 0,754403421 | 1,415062735 | 1,419265964 | 1,259246914 | 1,290566394 |
| <i>Nr1h2</i>         | 0,783716927 | 1,396331472 | 1,258497504 | 1,189341442 | 1,359400753 |
| <i>Dpysl2</i>        | 0,843150794 | 1,26528901  | 1,25984985  | 1,271107254 | 1,364677845 |
| <i>Rybp</i>          | 0,808005522 | 1,247076222 | 1,215982068 | 1,220745091 | 1,369735434 |
| <i>1300018J18Rik</i> | 0,874303904 | 1,17561435  | 1,156603211 | 1,299815976 | 1,372600115 |
| <i>Hdac10</i>        | 0,925297904 | 1,26802224  | 1,153919274 | 1,172530109 | 1,296330058 |
| <i>2310067B10Rik</i> | 0,957325945 | 1,244269582 | 1,165900754 | 1,171381849 | 1,338508702 |
| <i>Diap1</i>         | 0,845882781 | 1,202604087 | 1,38143002  | 1,179812484 | 1,35322048  |
| <i>Camk2g</i>        | 0,864408091 | 1,180247961 | 1,378911138 | 1,228165209 | 1,355738642 |
| <i>Slc39a14</i>      | 0,933715868 | 1,210884833 | 1,287932586 | 1,16615665  | 1,317187806 |
| <i>Akr1a1</i>        | 0,806837862 | 1,100500297 | 1,302457472 | 1,149495362 | 1,332724187 |
| <i>Zeb1</i>          | 0,789757565 | 1,192316352 | 1,30679631  | 1,110519313 | 1,366108462 |
| <i>Cox4i1</i>        | 0,751249802 | 1,209323038 | 1,32218801  | 1,327932061 | 1,381010791 |
| <i>Ccdc47</i>        | 0,755677136 | 1,131104381 | 1,36333208  | 1,361034898 | 1,358684355 |
| <i>Mapk14</i>        | 0,735393618 | 1,146788866 | 1,272051392 | 1,325955313 | 1,325031739 |
| <i>Ppp2r1b</i>       | 0,682763634 | 1,231630461 | 1,304139586 | 1,326089069 | 1,251488498 |
| <i>BC030336</i>      | 0,73442954  | 1,197382837 | 1,342150874 | 1,186190823 | 1,361067952 |
| <i>Stx1b</i>         | 0,746662434 | 1,187458183 | 1,355756135 | 1,23508475  | 1,34215521  |
| <i>Zfp644</i>        | 0,794206404 | 1,141194965 | 1,343711346 | 1,254274965 | 1,357278291 |
| <i>Man2a1</i>        | 0,732172183 | 1,158751756 | 1,316472893 | 1,217344256 | 1,269784849 |
| <i>Asf1a</i>         | 0,706172565 | 1,138545391 | 1,240949841 | 1,209360927 | 1,293268362 |
| <i>Pcgf5</i>         | 0,731440941 | 1,121627207 | 1,21920822  | 1,218847878 | 1,36377242  |
| <i>Ssu72</i>         | 0,646944226 | 0,995898232 | 1,082860543 | 1,140710541 | 1,348526831 |
| <i>Fdxr</i>          | 0,653495822 | 1,033503026 | 1,110365393 | 1,086849925 | 1,318063348 |
| <i>2310009A05Rik</i> | 0,644429355 | 1,074092764 | 1,04495966  | 1,054740023 | 1,360083838 |
| <i>Tmem63a</i>       | 0,688242068 | 1,081379215 | 1,09997229  | 1,180353365 | 1,403080437 |
| <i>lqgap2</i>        | 0,616615823 | 1,002920237 | 1,066426809 | 1,213601309 | 1,307254805 |
| <i>Tnpo1</i>         | 0,608774575 | 1,047696492 | 1,151413019 | 1,201437775 | 1,321557306 |
| <i>Ifit2</i>         | 0,600950646 | 1,039148058 | 1,106486301 | 1,143277477 | 1,173460107 |
| <i>Pfkfb4</i>        | 0,565702282 | 1,005058534 | 1,079817999 | 1,187619877 | 1,151636943 |
| <i>Lpin1</i>         | 0,570409153 | 0,969980569 | 1,189334048 | 1,187098815 | 1,193162133 |
| <i>Gm17745</i>       | 0,674182681 | 1,044312468 | 1,130324982 | 1,09861857  | 1,193809281 |
| <i>Exoc2</i>         | 0,640522374 | 1,052695392 | 1,156563285 | 1,084248188 | 1,189448034 |

|                      |             |             |             |             |             |
|----------------------|-------------|-------------|-------------|-------------|-------------|
| <i>Tnnt1</i>         | 0,699711632 | 1,013671317 | 1,171024205 | 1,138393632 | 1,143337425 |
| <i>Clip1</i>         | 0,803021884 | 1,017705073 | 1,17097531  | 1,082310538 | 1,243540993 |
| <i>Usp3</i>          | 0,814537603 | 1,117649548 | 1,181328509 | 1,110612914 | 1,232404392 |
| <i>Gm13807</i>       | 0,758563267 | 1,078471304 | 1,205363262 | 1,053188669 | 1,148469188 |
| <i>Pex14</i>         | 0,644659717 | 1,114104263 | 1,042819295 | 1,169976979 | 1,13411536  |
| <i>Gpatch3</i>       | 0,685480228 | 1,150859168 | 1,028887733 | 1,15739603  | 1,156196981 |
| <i>Fbxl20</i>        | 0,694768534 | 1,107091642 | 1,065635595 | 1,177171328 | 1,193111106 |
| <i>Trim35</i>        | 0,637273591 | 1,182171386 | 1,02114048  | 1,206029209 | 1,159881196 |
| <i>Ino80c</i>        | 0,595858438 | 1,159760281 | 1,159986823 | 1,032158351 | 1,121513479 |
| <i>Ostc</i>          | 0,614649927 | 1,182220238 | 1,15899962  | 1,085016554 | 1,154899558 |
| <i>Ezh1</i>          | 0,677727254 | 1,176377859 | 1,155059758 | 1,046456491 | 1,086236602 |
| <i>Ccnj</i>          | 0,691886113 | 1,199837495 | 1,211590753 | 1,227143586 | 1,190463692 |
| <i>Cdyl</i>          | 0,666245028 | 1,203730504 | 1,157313208 | 1,153156514 | 1,197063113 |
| <i>Gnl1</i>          | 0,750889365 | 1,129710402 | 1,209767183 | 1,169350003 | 1,096681784 |
| <i>Zc3h8</i>         | 0,623466998 | 1,202678621 | 1,200460433 | 1,291474745 | 1,093591061 |
| <i>Ankmy2</i>        | 0,584147203 | 1,218809589 | 1,24704066  | 1,257994559 | 1,13964226  |
| <i>Sec24b</i>        | 0,80238845  | 1,116907867 | 1,123554538 | 1,150821222 | 1,359377432 |
| <i>Mpzl3</i>         | 0,838044849 | 1,140741262 | 1,142472241 | 1,13791727  | 1,403654219 |
| <i>Krt10</i>         | 0,807151038 | 1,237013751 | 1,143915775 | 1,138943693 | 1,408350893 |
| <i>Fam160b2</i>      | 0,819249891 | 1,234093446 | 1,080433292 | 1,027350889 | 1,297983766 |
| <i>Dap</i>           | 0,708561383 | 1,185863677 | 1,24074661  | 1,067606253 | 1,408149326 |
| <i>Phax</i>          | 0,746736376 | 1,173574319 | 1,233897951 | 1,044725534 | 1,371227064 |
| <i>Gemin4</i>        | 0,7426077   | 1,221582081 | 1,282857269 | 0,985556597 | 1,346677957 |
| <i>Ankrd55</i>       | 0,746808997 | 1,15101263  | 1,244161235 | 1,07791614  | 1,281244087 |
| <i>Stk40</i>         | 0,712569183 | 1,20263013  | 1,273158174 | 1,061363291 | 1,321715252 |
| <i>Mrps36</i>        | 0,752496948 | 1,25949209  | 1,228575192 | 1,09785265  | 1,325627346 |
| <i>4930515B02Rik</i> | 0,898100024 | 1,229882093 | 1,077878057 | 1,201428967 | 1,180804382 |
| <i>Actr8</i>         | 0,800929035 | 1,287005199 | 1,121885462 | 1,281593634 | 1,204967183 |
| <i>Ccr10</i>         | 0,935668691 | 1,300963183 | 0,907140524 | 1,165710384 | 1,267076861 |
| <i>Rab25</i>         | 0,956532039 | 1,387365408 | 1,035848709 | 1,153434589 | 1,467421553 |
| <i>N6amt2</i>        | 0,766547513 | 1,363256914 | 1,124235013 | 1,07956943  | 1,452410302 |
| <i>Ube2j1</i>        | 0,566598105 | 1,296507004 | 0,997145884 | 1,305444586 | 1,231192727 |
| <i>Dusp27</i>        | 0,626576878 | 1,350505553 | 1,139180407 | 1,251453372 | 1,251860452 |
| <i>Fos</i>           | 0,710393132 | 1,342226783 | 0,889407476 | 1,363889422 | 1,319064365 |
| <i>Gm4262</i>        | 0,647399519 | 1,189517497 | 1,025003892 | 1,251498657 | 1,438986573 |
| <i>Mars</i>          | 0,664624519 | 1,163469123 | 0,959423046 | 1,21200862  | 1,337095196 |
| <i>Smarcc2</i>       | 0,726799376 | 1,160686609 | 1,097768535 | 1,30594584  | 1,425148849 |
| <i>Mmab</i>          | 0,7551819   | 1,171807445 | 1,041855134 | 1,398011887 | 1,408257968 |
| <i>Golgb1</i>        | 0,474598526 | 1,499416852 | 1,222389901 | 1,165866479 | 1,046240246 |
| <i>Ap3m1</i>         | 0,470755568 | 1,436457512 | 1,128049576 | 1,284844188 | 1,120574201 |
| <i>5730460C07Rik</i> | 0,552694875 | 1,477816567 | 1,032890941 | 1,071122444 | 1,237252207 |
| <i>Mum1</i>          | 0,63806672  | 1,464321164 | 1,084614723 | 1,085311419 | 1,136279465 |
| <i>Arhgap33</i>      | 0,557755335 | 1,338341052 | 1,335365821 | 1,110376269 | 1,198005233 |
| <i>Gm4278</i>        | 0,57244872  | 1,400533009 | 1,352097615 | 1,192355009 | 1,33064431  |
| <i>Zfp784</i>        | 0,484020441 | 1,384770474 | 1,218438606 | 0,985618199 | 1,311547166 |
| <i>Psm4</i>          | 0,502728547 | 1,447012844 | 1,148059259 | 1,20821034  | 1,327250376 |
| <i>Gm20337</i>       | 0,41137435  | 1,557483821 | 1,058681579 | 1,134822787 | 1,44186344  |
| <i>Rbl1</i>          | 0,354526357 | 1,291934576 | 1,230028979 | 1,297350294 | 1,203280834 |
| <i>Zbtb34</i>        | 0,400719959 | 1,327709684 | 1,299014074 | 1,284147084 | 1,156982542 |
| <i>Leprot</i>        | 0,382555175 | 1,303761364 | 1,119128433 | 1,30928217  | 1,220365297 |
| <i>Mboat1</i>        | 0,511097263 | 1,500429312 | 1,147301963 | 1,464945844 | 1,182977527 |

|                      |             |             |             |             |             |
|----------------------|-------------|-------------|-------------|-------------|-------------|
| <i>Arl5a</i>         | 0,465251726 | 1,477501222 | 1,086369691 | 1,440617785 | 1,236650873 |
| <i>Gm5434</i>        | 0,429068953 | 1,534726551 | 1,324525669 | 0,919314895 | 1,115108597 |
| <i>Rab19</i>         | 0,37507938  | 1,44528327  | 1,35620026  | 1,162874263 | 0,983329194 |
| <i>Kctd14</i>        | 0,731139524 | 1,413329305 | 1,396234792 | 0,849014732 | 0,964494076 |
| <i>6330403K07Rik</i> | 0,674329637 | 1,339542743 | 1,511997698 | 0,943284358 | 0,975013967 |
| <i>Cybrd1</i>        | 0,849738407 | 1,404237961 | 1,115343034 | 1,208100473 | 0,943810041 |
| <i>5033414D02Rik</i> | 0,752893411 | 1,453876109 | 1,046188693 | 1,128209863 | 1,02092611  |
| <i>1700010I14Rik</i> | 0,670372152 | 1,355188621 | 1,334441032 | 1,172346453 | 1,046959248 |
| <i>Pdcd1lg2</i>      | 0,68946999  | 1,447024827 | 1,253483803 | 1,087981362 | 1,081179639 |
| <i>Elac1</i>         | 0,705667579 | 1,330729893 | 1,276930371 | 1,332352129 | 1,102411911 |
| <i>Hnrpl1</i>        | 0,635530976 | 1,417561064 | 1,19582215  | 1,391418905 | 1,043512193 |
| <i>Cd81</i>          | 0,744418289 | 1,435620438 | 1,289452059 | 1,46415339  | 1,003539077 |
| <i>S100b</i>         | 1,38715833  | 1,612223599 | 1,099868961 | 1,329205313 | 0,987895388 |
| <i>8030423F21Rik</i> | 1,225316653 | 1,63958581  | 1,336360074 | 1,31739324  | 0,990055436 |
| <i>Nrn1l</i>         | 1,160019631 | 1,298890075 | 1,303055012 | 1,402149368 | 0,830096191 |
| <i>Cd44</i>          | 0,988252296 | 1,243036403 | 1,008411901 | 1,070028473 | 0,881782481 |
| <i>Nsmce2</i>        | 0,942630138 | 1,202607572 | 1,076589694 | 0,98624542  | 0,901683379 |
| <i>Hivep3</i>        | 0,968804442 | 1,293966712 | 0,977479859 | 0,944413023 | 0,82793313  |
| <i>Osbpl3</i>        | 0,95182958  | 1,249287449 | 0,987844351 | 0,972702625 | 0,892233225 |
| <i>2010109A12Rik</i> | 1,059035013 | 1,276324706 | 0,978278404 | 1,00385069  | 0,991001337 |
| <i>4930455F23Rik</i> | 1,135984775 | 1,344661171 | 0,964604888 | 0,838593784 | 0,779537582 |
| <i>Sh3rf1</i>        | 1,210848221 | 1,339319027 | 1,075032065 | 0,968119189 | 0,790402154 |
| <i>1810062G17Rik</i> | 1,066346796 | 1,433990217 | 1,188665332 | 0,960331977 | 1,068481863 |
| <i>Zfp770</i>        | 1,047735671 | 1,407439737 | 1,115998347 | 1,001264815 | 0,976951739 |
| <i>Serpib5</i>       | 1,140126288 | 1,346346818 | 1,153710646 | 1,102762641 | 0,959089386 |
| <i>Ephb6</i>         | 1,132105887 | 1,380455631 | 1,350702583 | 1,092626662 | 0,84467079  |
| <i>Cnot10</i>        | 1,03681321  | 1,298985987 | 1,167294315 | 1,243698023 | 1,091637864 |
| <i>Atxn10</i>        | 0,981889048 | 1,246107211 | 1,091538679 | 1,161913518 | 1,063067836 |
| <i>Fanci</i>         | 1,014526299 | 1,308837619 | 1,188875761 | 1,318481459 | 0,955435075 |
| <i>Slc45a4</i>       | 0,869126086 | 1,244770699 | 1,005898433 | 1,143984229 | 0,955439449 |
| <i>Zfp870</i>        | 0,808342896 | 1,1779209   | 1,081727099 | 1,159592446 | 0,942520863 |
| <i>Bmp2k</i>         | 0,839670517 | 1,256755432 | 1,083191237 | 1,281277567 | 1,008541237 |
| <i>Gpr179</i>        | 0,901359064 | 1,155920356 | 1,006843858 | 1,21844686  | 0,951789991 |
| <i>Sox13</i>         | 0,982564189 | 1,172942345 | 1,053261234 | 1,257167131 | 0,96651513  |
| <i>Wdfy2</i>         | 0,934904702 | 1,142407038 | 1,218309357 | 1,045627666 | 1,041914811 |
| <i>6030440G07Rik</i> | 0,95945831  | 1,185308017 | 1,187834876 | 1,002350159 | 1,028308266 |
| <i>Tespa1</i>        | 0,851745703 | 1,183279868 | 1,165210015 | 1,03474964  | 1,104927818 |
| <i>Ndrp3</i>         | 1,009283582 | 1,228537782 | 1,165731411 | 1,007619549 | 1,108499645 |
| <i>Zswim1</i>        | 1,007581108 | 1,258886348 | 1,324757502 | 0,973235542 | 1,05020273  |
| <i>Itga9</i>         | 1,050851796 | 1,137642073 | 1,168243032 | 1,047341804 | 0,924490774 |
| <i>Sall3</i>         | 1,026381339 | 1,254318312 | 1,223603391 | 1,004796301 | 0,936146937 |
| <i>Slc25a25</i>      | 0,952326407 | 1,181208023 | 1,133088041 | 1,11262137  | 1,216811148 |
| <i>Tm7sf3</i>        | 0,974050291 | 1,188576001 | 1,135402085 | 1,130926654 | 1,225496548 |
| <i>Slc25a12</i>      | 1,018232643 | 1,127925005 | 1,098249041 | 1,100938506 | 1,160949211 |
| <i>Trim71</i>        | 1,007340536 | 1,189730901 | 1,23007426  | 1,102449583 | 1,201185256 |
| <i>Tpm2</i>          | 1,015406119 | 1,120505726 | 1,148619746 | 1,059730583 | 1,199934704 |
| <i>Ptprn</i>         | 1,027610573 | 1,100302048 | 1,167146254 | 1,015426192 | 1,146843709 |
| <i>Fzr1</i>          | 1,043888666 | 1,116004757 | 1,161108678 | 0,987926604 | 1,249550809 |
| <i>Acot13</i>        | 1,034919362 | 1,044662068 | 1,143959457 | 1,023173689 | 1,19589779  |
| <i>4833420G17Rik</i> | 1,009497114 | 1,02989151  | 1,073752453 | 1,028801181 | 1,188138726 |
| <i>Cand2</i>         | 1,128011024 | 1,076171292 | 1,223541842 | 1,220707074 | 1,281552837 |

|                      |             |             |             |             |             |
|----------------------|-------------|-------------|-------------|-------------|-------------|
| <i>Med24</i>         | 1,059480145 | 1,098531891 | 1,224205379 | 1,178812647 | 1,250388105 |
| <i>Nfe2l3</i>        | 1,127767225 | 1,144088389 | 1,235673912 | 1,249718634 | 1,170562114 |
| <i>Cpne5</i>         | 1,125561338 | 1,213075783 | 1,075365903 | 1,138131399 | 1,146907239 |
| <i>Kidins220</i>     | 1,167197506 | 1,181580676 | 1,049689345 | 1,110435806 | 1,104616311 |
| <i>Fam129c</i>       | 1,160594419 | 1,198869934 | 1,157840412 | 1,172983353 | 1,114899587 |
| <i>Polrmt</i>        | 1,244816204 | 1,2401396   | 0,990658644 | 1,128929265 | 1,117434784 |
| <i>Fbxo17</i>        | 1,135281943 | 1,121675046 | 1,024846877 | 1,223847338 | 1,18761511  |
| <i>Ap2s1</i>         | 1,147652625 | 1,111689273 | 0,982602516 | 1,141813891 | 1,153904451 |
| <i>8430406I07Rik</i> | 1,068660581 | 1,233253564 | 1,025403536 | 1,147589408 | 1,1599899   |
| <i>Uhrf1bp1l</i>     | 1,020084335 | 1,303774895 | 1,169150493 | 1,114024413 | 1,167658518 |
| <i>Dnajc25</i>       | 1,066602561 | 1,316110002 | 1,233623411 | 1,150081439 | 1,125581624 |
| <i>Ppt2</i>          | 1,151374902 | 1,239360053 | 1,172855526 | 1,087052233 | 1,225619752 |
| <i>Gdf11</i>         | 0,986917368 | 1,426662629 | 1,187895217 | 1,11425353  | 1,212010998 |
| <i>Galt</i>          | 1,087180542 | 1,414029211 | 1,077738588 | 1,125387813 | 1,266296372 |
| <i>Gabarapl2</i>     | 0,474557033 | 1,23184309  | 1,197761678 | 1,489193688 | 1,245362407 |
| <i>Aim1</i>          | 0,623189602 | 1,2244352   | 1,202273748 | 1,507489816 | 1,320698968 |
| <i>Slc22a1</i>       | 0,540735387 | 1,183390409 | 1,156600099 | 1,349041633 | 1,276892249 |
| <i>Micall1</i>       | 0,580916583 | 1,214918408 | 1,149714917 | 1,390935462 | 1,257936547 |
| <i>Yaf2</i>          | 0,568546561 | 1,274939071 | 1,140308371 | 1,404306246 | 1,295352331 |
| <i>Ranbp10</i>       | 0,573111088 | 1,204598726 | 1,006787987 | 1,508463645 | 1,196369224 |
| <i>Nr2e3</i>         | 0,415243628 | 1,158937942 | 0,978295381 | 1,566187071 | 1,22127899  |
| <i>Gpnmb</i>         | 0,566002154 | 1,136783271 | 1,018291803 | 1,284573682 | 1,130418815 |
| <i>Dpf2</i>          | 0,536514735 | 1,04164435  | 1,014430989 | 1,304086669 | 1,096469101 |
| <i>Fam84b</i>        | 0,461594565 | 1,070750359 | 1,092312966 | 1,409443332 | 1,059328665 |
| <i>Fam55c</i>        | 0,586847155 | 1,05369746  | 0,903895579 | 1,376990996 | 1,142782844 |
| <i>Zfp623</i>        | 0,539088638 | 1,130124818 | 0,880498167 | 1,452410738 | 1,116348119 |
| <i>Kifc5b</i>        | 0,664259518 | 1,231094571 | 1,145194846 | 1,359396098 | 1,088414198 |
| <i>Gm129</i>         | 0,650638856 | 1,200048549 | 1,011604678 | 1,317310341 | 1,045069107 |
| <i>Myo10</i>         | 0,736283184 | 1,11491913  | 1,01925319  | 1,447906107 | 0,918355829 |
| <i>Tssc4</i>         | 0,722852671 | 1,235707745 | 1,032356873 | 1,415972626 | 0,89403782  |
| <i>Apoa5</i>         | 0,831642631 | 1,157657509 | 1,009671551 | 1,498888899 | 1,176222893 |
| <i>Lpar5</i>         | 0,809973242 | 1,107073977 | 0,91616377  | 1,445768686 | 1,143674942 |
| <i>Espn</i>          | 0,718297319 | 1,237780281 | 0,91328793  | 1,561651144 | 1,129914318 |
| <i>1600012H06Rik</i> | 0,539113725 | 0,831416939 | 1,065142824 | 1,326978615 | 1,060526594 |
| <i>Gfod2</i>         | 0,52589656  | 0,820228472 | 0,995796466 | 1,33152904  | 1,065792279 |
| <i>Trmt12</i>        | 0,625563837 | 0,887665721 | 1,058405007 | 1,46890295  | 1,142546762 |
| <i>Rnf5</i>          | 0,751049575 | 0,777594354 | 1,164030133 | 1,373833019 | 0,98412361  |
| <i>P2ry14</i>        | 0,808447942 | 0,918976059 | 0,919802941 | 1,21992226  | 0,97020425  |
| <i>Asprv1</i>        | 0,745212447 | 0,900504886 | 1,086897035 | 1,23315668  | 0,882420136 |
| <i>Snrpb</i>         | 0,585724864 | 0,874454044 | 1,092335736 | 1,242941811 | 1,016797393 |
| <i>Igf2bp3</i>       | 0,657572713 | 0,853754482 | 1,091173054 | 1,119562895 | 1,007713443 |
| <i>4831440E17Rik</i> | 0,886580455 | 0,832081413 | 1,040245882 | 1,19836665  | 1,172155157 |
| <i>Bckdk</i>         | 0,918255044 | 0,868930296 | 1,104831907 | 1,337311095 | 1,182461474 |
| <i>Commd6</i>        | 0,861931484 | 0,916205098 | 0,924691586 | 1,330790346 | 1,23385785  |
| <i>Slc25a45</i>      | 0,836675009 | 0,945532914 | 0,85400768  | 1,242748018 | 1,201203087 |
| <i>Ddx3x</i>         | 0,826143077 | 1,086756851 | 1,095351373 | 1,196790171 | 1,235573888 |
| <i>Tbc1d1</i>        | 0,770785787 | 1,017349098 | 1,022920449 | 1,247190638 | 1,236913414 |
| <i>Fam49a</i>        | 0,809081447 | 1,128258981 | 1,099373451 | 1,360681089 | 1,237157505 |
| <i>AI480653</i>      | 0,847840146 | 1,053096637 | 1,082673235 | 1,213953602 | 1,06654877  |
| <i>Tmc3</i>          | 0,437798899 | 1,029463488 | 1,059051427 | 1,044225963 | 0,94841641  |
| <i>Grhl1</i>         | 0,34999505  | 1,111560263 | 1,058313907 | 1,055752526 | 1,005833957 |

|                      |             |             |             |             |             |
|----------------------|-------------|-------------|-------------|-------------|-------------|
| <i>Nit1</i>          | 0,35729484  | 0,972856794 | 1,045623588 | 1,108553439 | 1,029119496 |
| <i>Kdm1a</i>         | 0,348061148 | 0,982841202 | 1,004113503 | 1,013892286 | 1,01621619  |
| <i>Wasl</i>          | 0,372050837 | 1,012879356 | 1,110442631 | 1,076913416 | 1,139833167 |
| <i>Hmox2</i>         | 0,374780034 | 1,023187565 | 1,153584435 | 1,121689433 | 1,166077906 |
| <i>Nono</i>          | 0,322483459 | 1,025506685 | 1,095470257 | 1,157081583 | 1,102671158 |
| <i>Dock9</i>         | 0,361248281 | 1,016912735 | 1,217694831 | 1,084581316 | 1,091062431 |
| <i>Man1a2</i>        | 0,357550803 | 1,108275197 | 0,994233826 | 1,147348927 | 1,096831911 |
| <i>Ankrd12</i>       | 0,233406023 | 1,039777711 | 0,920146342 | 1,135845408 | 1,101021043 |
| <i>Tbc1d15</i>       | 0,331154018 | 0,919758155 | 1,056650572 | 1,15673714  | 1,160815399 |
| <i>Dicer1</i>        | 0,35681133  | 0,974939669 | 1,01614901  | 1,180913532 | 1,136494121 |
| <i>BC017647</i>      | 0,296456189 | 0,964229707 | 1,030367425 | 1,148872099 | 1,222319912 |
| <i>Ggnbp2</i>        | 0,407637951 | 0,92415134  | 1,223991059 | 1,052152579 | 1,171098553 |
| <i>Arhgap11a</i>     | 0,315634294 | 0,891130167 | 1,211890688 | 1,125392983 | 1,216118699 |
| <i>Mapre1</i>        | 0,315200857 | 0,954435075 | 1,247073838 | 0,934504723 | 1,204375913 |
| <i>Tox4</i>          | 0,229329612 | 0,977795049 | 1,12087101  | 1,031234047 | 1,233051207 |
| <i>Lsm12</i>         | 0,311344113 | 1,014352738 | 1,191974006 | 1,029100865 | 1,236489106 |
| <i>Psmc4</i>         | 0,359510967 | 0,979848067 | 1,154208313 | 1,035982392 | 1,328454257 |
| <i>Rchy1</i>         | 0,374129019 | 1,032735709 | 1,10510656  | 1,055518013 | 1,323610983 |
| <i>Gtf2b</i>         | 0,315540247 | 0,785448031 | 1,054305015 | 1,026281874 | 1,129261688 |
| <i>Eif1a</i>         | 0,348409093 | 0,776112046 | 1,112546722 | 1,109402586 | 1,153555705 |
| <i>Psen1</i>         | 0,348679113 | 0,829307862 | 1,046118667 | 1,126752153 | 1,119448301 |
| <i>Rsbn1</i>         | 0,373378072 | 0,862310667 | 1,022909439 | 1,125206688 | 1,112865446 |
| <i>Tnrc6a</i>        | 0,290845209 | 0,925873283 | 1,051487345 | 0,98614158  | 1,1738528   |
| <i>Ndfip2</i>        | 0,258822423 | 0,934634171 | 1,036497128 | 1,018720699 | 1,149237843 |
| <i>Rsf1</i>          | 0,323555229 | 0,924408799 | 1,05906307  | 1,010807252 | 1,120200178 |
| <i>Gm7244</i>        | 0,420855047 | 1,013680845 | 1,098171265 | 1,247506856 | 1,101840898 |
| <i>Lpcat1</i>        | 0,463768988 | 0,976057712 | 0,987838029 | 1,265108397 | 1,039810129 |
| <i>Tgds</i>          | 0,447729758 | 1,020370239 | 1,035645885 | 1,165852405 | 1,139855525 |
| <i>Ttc28</i>         | 0,447249322 | 0,9710465   | 0,975536653 | 1,144363701 | 1,130932438 |
| <i>Zfp14</i>         | 0,466499    | 0,99165277  | 0,982548422 | 1,232323553 | 1,137361667 |
| <i>Itpr1</i>         | 0,466110017 | 1,082431689 | 0,973635131 | 1,158951453 | 1,007971573 |
| <i>Faft1</i>         | 0,562584727 | 1,059662501 | 1,011858756 | 1,170514173 | 0,941128606 |
| <i>Heatr5a</i>       | 0,572531515 | 1,107727505 | 1,063822536 | 1,12937997  | 1,050179946 |
| <i>4930579G22Rik</i> | 0,587412856 | 0,999076927 | 1,136975518 | 1,281182641 | 0,941697232 |
| <i>Srrd</i>          | 0,535365286 | 1,071506057 | 1,172785805 | 1,17634075  | 0,897097087 |
| <i>Polr2a</i>        | 0,444783837 | 1,112987376 | 1,202684824 | 1,189891267 | 1,318815758 |
| <i>Cnot1</i>         | 0,431122848 | 1,152569099 | 1,283711771 | 1,142342341 | 1,348099743 |
| <i>Gmeb1</i>         | 0,445960204 | 1,076468372 | 1,279053767 | 1,115721834 | 1,239414169 |
| <i>Riok3</i>         | 0,446310677 | 1,052975972 | 1,293577743 | 1,181194682 | 1,295824188 |
| <i>Ino80d</i>        | 0,41729825  | 1,095638987 | 1,105392014 | 1,088493194 | 1,320809609 |
| <i>Eif4g3</i>        | 0,431295559 | 1,064122374 | 1,145640873 | 1,14861869  | 1,2916721   |
| <i>Atp6v1d</i>       | 0,354888744 | 1,141096166 | 1,107954981 | 1,176269087 | 1,311553685 |
| <i>Lims1</i>         | 0,313462899 | 1,046157711 | 1,110691693 | 1,210607097 | 1,20667787  |
| <i>Nap1l4</i>        | 0,327867336 | 0,948888729 | 1,134676017 | 1,218830475 | 1,247026421 |
| <i>Cltc</i>          | 0,284324887 | 1,08927062  | 1,149544041 | 1,157362398 | 1,287905905 |
| <i>Supt6h</i>        | 0,283072889 | 1,076961302 | 1,162222483 | 1,154352863 | 1,318095288 |
| <i>Zc3h11a</i>       | 0,323912248 | 1,075580081 | 1,140576945 | 1,131895221 | 1,295873574 |
| <i>Erbp2ip</i>       | 0,315166589 | 1,039075581 | 1,215222935 | 1,134949969 | 1,243396391 |
| <i>Epc2</i>          | 0,320293812 | 1,066963411 | 1,184440049 | 1,211918669 | 1,328917393 |
| <i>Cct6a</i>         | 0,355366866 | 1,027274658 | 1,180542595 | 1,165341829 | 1,395476281 |
| <i>Scaf11</i>        | 0,344558744 | 1,083333528 | 1,139053886 | 1,30342516  | 1,356321999 |

|                      |             |             |             |             |             |
|----------------------|-------------|-------------|-------------|-------------|-------------|
| <i>Asxl1</i>         | 0,384699879 | 1,063343232 | 1,210287949 | 1,275231189 | 1,339984716 |
| <i>Ptpn12</i>        | 0,455089685 | 1,164069159 | 1,123565398 | 1,265349257 | 1,331660615 |
| <i>Ddx46</i>         | 0,496975676 | 1,159536406 | 1,087847914 | 1,30249778  | 1,316228518 |
| <i>Zbtb32</i>        | 0,458422432 | 1,106821569 | 1,063051857 | 1,255873799 | 1,327113996 |
| <i>Serp1</i>         | 0,395291082 | 1,107598012 | 1,081350653 | 1,255738867 | 1,321863878 |
| <i>Pdcd2</i>         | 0,449240618 | 1,185474895 | 1,150541844 | 1,259860849 | 1,212824722 |
| <i>Mfap4</i>         | 0,464507194 | 1,150665938 | 1,088510188 | 1,292228739 | 1,19980623  |
| <i>Polr1d</i>        | 0,40002843  | 1,041180259 | 1,131586361 | 1,318207687 | 1,254713468 |
| <i>E330009J07Rik</i> | 0,378375376 | 1,05436201  | 1,033239131 | 1,340577712 | 1,211322758 |
| <i>Pigo</i>          | 0,560408664 | 1,045030537 | 1,019253988 | 1,11017815  | 1,229819212 |
| <i>Herc3</i>         | 0,541280105 | 0,998181787 | 1,035001909 | 1,077817327 | 1,147537167 |
| <i>Specc1l</i>       | 0,503786593 | 1,087718413 | 0,982160294 | 1,098618852 | 1,121971359 |
| <i>Rab40c</i>        | 0,508864509 | 1,062516038 | 0,99423329  | 1,02557807  | 1,144617739 |
| <i>Bcl7b</i>         | 0,409949086 | 1,114754897 | 0,982310652 | 1,005613592 | 1,182363061 |
| <i>Nmi</i>           | 0,377336813 | 1,086789602 | 1,03196228  | 1,035255163 | 1,221741412 |
| <i>Polr3gl</i>       | 0,421581542 | 1,048944103 | 0,962011988 | 1,221532472 | 1,204693108 |
| <i>Tk2</i>           | 0,425255257 | 1,033751049 | 1,047882262 | 1,20080966  | 1,239350879 |
| <i>2010002M12Rik</i> | 0,505497746 | 1,062858615 | 0,95658564  | 1,139419505 | 1,296542516 |
| <i>March6</i>        | 0,404482224 | 1,121011257 | 1,147084011 | 1,192485739 | 1,10563671  |
| <i>1700052N19Rik</i> | 0,433956734 | 1,174199586 | 1,123959724 | 1,106464333 | 1,084291372 |
| <i>Jak2</i>          | 0,445177445 | 1,196308811 | 1,14328906  | 1,161500681 | 1,228932177 |
| <i>Suclg1</i>        | 0,466866047 | 1,166065935 | 1,149698572 | 1,194879736 | 1,214806768 |
| <i>Mtap</i>          | 0,471358509 | 1,147686851 | 1,080014777 | 1,127291799 | 1,182488886 |
| <i>Zdhhc17</i>       | 0,489966735 | 1,147003477 | 1,072646869 | 1,146782973 | 1,186338311 |
| <i>Jmjd1c</i>        | 0,494031355 | 1,02405477  | 1,126626781 | 1,125570376 | 1,205714152 |
| <i>Trp53bp2</i>      | 0,467963005 | 1,017503812 | 1,142343229 | 1,142442053 | 1,215993912 |
| <i>Tmem165</i>       | 0,472763031 | 1,052363226 | 1,193782195 | 1,034249597 | 1,178421174 |
| <i>Hmg20a</i>        | 0,551654477 | 1,077736905 | 1,081998752 | 1,018244277 | 1,226073305 |
| <i>Rbm24</i>         | 0,589255165 | 1,020867771 | 1,139907298 | 1,036175212 | 1,191598413 |
| <i>Fez2</i>          | 0,464649277 | 1,000993004 | 1,044746072 | 1,126045364 | 1,305287284 |
| <i>Hnrnpr</i>        | 0,493801927 | 0,989777436 | 1,042912124 | 1,129345978 | 1,262623536 |
| <i>Gorasp2</i>       | 0,480886071 | 0,960295977 | 1,108276018 | 1,113188529 | 1,298645288 |
| <i>Nsd1</i>          | 0,521809452 | 1,033751154 | 1,108929576 | 1,149963323 | 1,294129045 |
| <i>Thnsl1</i>        | 0,244098151 | 0,966365434 | 1,3219147   | 1,254908824 | 1,250630792 |
| <i>Rps4x</i>         | 0,324844979 | 0,979179105 | 1,335109066 | 1,146300678 | 1,209157321 |
| <i>Rnf19a</i>        | 0,275464938 | 1,108443227 | 1,331319736 | 1,328084511 | 1,217896985 |
| <i>Rab10</i>         | 0,222843277 | 1,079219011 | 1,271912557 | 1,330361037 | 1,259359023 |
| <i>D1Bwg0212e</i>    | 0,345163044 | 0,810950099 | 1,295211803 | 1,185156187 | 1,099052627 |
| <i>Tns4</i>          | 0,248754039 | 0,82329675  | 0,936836798 | 1,223670902 | 1,380461822 |
| <i>Bzw1</i>          | 0,23922166  | 0,710848742 | 1,064939843 | 1,275140933 | 1,35371096  |
| <i>Gm2447</i>        | 0,315997317 | 0,743407733 | 0,973062499 | 1,410856508 | 1,203842671 |
| <i>Tnfsf8</i>        | 0,307239093 | 0,861485006 | 0,946528048 | 1,454801777 | 1,294292154 |
| <i>Ensa</i>          | 0,36781461  | 0,914947623 | 1,124127506 | 1,343457503 | 1,404850652 |
| <i>Hnrnpa1</i>       | 0,282953762 | 0,898273318 | 1,108215008 | 1,372218408 | 1,398238153 |
| <i>Gm10052</i>       | 0,298908168 | 0,893097935 | 1,122696551 | 1,297206829 | 1,329579669 |
| <i>Tmem60</i>        | 0,385632921 | 0,890080934 | 1,164985993 | 1,427600524 | 1,291564281 |
| <i>Syncrip</i>       | 0,29747098  | 0,895201796 | 1,217869116 | 1,330101351 | 1,341214862 |
| <i>Smndc1</i>        | 0,238968399 | 0,922579066 | 1,266268905 | 1,369778111 | 1,360213169 |
| <i>Gm12191</i>       | 0,408880528 | 0,787495979 | 1,102009264 | 1,541732187 | 1,075463594 |
| <i>Rpl30</i>         | 0,408641885 | 0,759929876 | 1,101985417 | 1,534197276 | 1,075433208 |
| <i>Tmem93</i>        | 0,229143751 | 0,745872371 | 1,151044358 | 1,428037989 | 0,951683232 |

|                      |              |             |             |             |             |
|----------------------|--------------|-------------|-------------|-------------|-------------|
| <i>Csrp1</i>         | 0,758925995  | 1,048757149 | 1,493286992 | 1,140544393 | 1,191036796 |
| <i>Rab7l1</i>        | 0,746932464  | 1,07059353  | 1,536090219 | 1,088689234 | 1,292126695 |
| <i>Npm3</i>          | 0,791010922  | 0,885106973 | 1,566933347 | 1,025972459 | 1,135861114 |
| <i>Taldo1</i>        | 0,795396615  | 0,987137509 | 1,338566067 | 1,188199489 | 1,103134773 |
| <i>Chaf1b</i>        | 0,816040457  | 1,124292673 | 1,33727617  | 1,188291156 | 1,04673777  |
| <i>Naa10</i>         | 0,704674648  | 1,023367693 | 1,419284743 | 1,0987453   | 1,02627856  |
| <i>1700064J06Rik</i> | 0,912486084  | 0,902467845 | 1,429170616 | 0,990457224 | 1,354723314 |
| <i>Fem1a</i>         | 0,92566511   | 0,941900152 | 1,382890357 | 1,01432768  | 1,354124387 |
| <i>Slbp</i>          | 1,035740599  | 0,853334003 | 1,339658435 | 1,047694926 | 1,324974431 |
| <i>Cic</i>           | 1,087665375  | 0,81792089  | 1,404365009 | 1,143068769 | 1,112976781 |
| <i>H3f3b</i>         | 0,769225609  | 0,802937061 | 1,576502797 | 1,583819785 | 0,987315711 |
| <i>Mrps2</i>         | 0,409664821  | 1,090576755 | 0,64045755  | 1,47084722  | 0,743234104 |
| <i>Cdhr3</i>         | 0,338321707  | 1,152853224 | 0,709355507 | 1,411690519 | 0,700747341 |
| <i>Flad1</i>         | 0,526807241  | 1,115589192 | 0,707204732 | 1,293907319 | 0,589352266 |
| <i>Polr1a</i>        | 0,229718336  | 1,218027378 | 0,817692368 | 1,301056622 | 0,775861051 |
| <i>Pyroxd2</i>       | 0,325051464  | 1,163863861 | 0,737250207 | 1,198485955 | 0,685656099 |
| <i>Paqr8</i>         | 0,174681986  | 1,039931355 | 0,684820322 | 1,18407011  | 0,703553144 |
| <i>Zq16</i>          | 0,420150531  | 1,243739006 | 0,454853826 | 1,323823458 | 0,92233785  |
| <i>1110028F11Rik</i> | 0,480354469  | 1,100215352 | 0,723109711 | 1,229912243 | 0,944362864 |
| <i>Trub1</i>         | 0,623812595  | 1,024654309 | 0,820374619 | 1,339151149 | 0,893146978 |
| <i>Ctdsp2</i>        | 0,42763651   | 0,960209459 | 0,833712717 | 1,32322949  | 1,102728307 |
| <i>A330049M08Rik</i> | 0,413963111  | 0,918708873 | 0,696572074 | 1,465685328 | 0,851834632 |
| <i>Timm8a2</i>       | 0,294634662  | 1,298976054 | 1,000311593 | 1,393584897 | 0,969715073 |
| <i>1700025G04Rik</i> | 0,394933451  | 1,297618554 | 1,056707287 | 1,295800843 | 0,986260229 |
| <i>Gcfc1</i>         | 0,374004058  | 1,252776334 | 0,996835205 | 1,307048659 | 1,18131085  |
| <i>Zfp330</i>        | 0,367855406  | 1,217651516 | 0,997911212 | 1,248039713 | 1,102970252 |
| <i>Vrk3</i>          | 0,34991414   | 1,15730311  | 0,809542366 | 1,194351592 | 1,061002562 |
| <i>3230401D17Rik</i> | 0,20494482   | 1,141360324 | 0,806888155 | 1,239491451 | 1,013324525 |
| <i>Drosha</i>        | 0,542930238  | 1,235374354 | 0,869194842 | 1,310544555 | 0,852686469 |
| <i>Mmp9</i>          | 0,438985646  | 1,302801957 | 0,804516524 | 1,256252152 | 1,028217653 |
| <i>Litaf</i>         | 0,436652864  | 1,486454275 | 0,858043854 | 1,496074413 | 1,193827953 |
| <i>Ccdc87</i>        | 0,365715111  | 1,357367509 | 0,864728438 | 1,507582576 | 1,05670058  |
| <i>Slx4</i>          | 0,462865309  | 1,419982014 | 0,984269851 | 1,209371261 | 1,038989795 |
| <i>Lbx2</i>          | 0,403560377  | 1,496732848 | 0,874091761 | 1,192130694 | 1,149965379 |
| <i>2010010A06Rik</i> | 0,324136771  | 1,685136091 | 1,02187587  | 1,526411293 | 1,544823932 |
| <i>Btla</i>          | 0,212056225  | 1,623003232 | 1,214282054 | 1,692575588 | 1,543844126 |
| <i>Tceb1</i>         | 0,244592369  | 1,820200526 | 1,45177008  | 1,627243276 | 1,541694743 |
| <i>Ddx24</i>         | -0,010610521 | 1,78657445  | 1,357210124 | 1,653949862 | 1,605725332 |
| <i>Itm2a</i>         | -0,340927139 | 2,060976849 | 1,414564037 | 1,302307852 | 1,141071734 |
| <i>Il18bp</i>        | 0,542986912  | 1,844760758 | 1,533485366 | 1,430467856 | 1,376655827 |
| <i>Tox</i>           | 0,475382605  | 1,804648344 | 1,74366172  | 1,608096    | 1,541879684 |
| <i>1810032O08Rik</i> | 0,460788149  | 1,683900202 | 1,397623603 | 1,784177242 | 1,496827988 |
| <i>BC027231</i>      | 0,646770809  | 1,807227307 | 1,432129045 | 1,702600664 | 1,504201489 |
| <i>2810001G20Rik</i> | 0,287698997  | 1,815536573 | 1,745379473 | 1,791372438 | 1,303456855 |
| <i>Acot7</i>         | 0,611320809  | 1,741386167 | 1,19634608  | 1,548023978 | 1,126233356 |
| <i>Thap2</i>         | 0,615187415  | 1,708259618 | 1,305111537 | 1,383436971 | 1,216427352 |
| <i>Zfp446</i>        | 0,457467217  | 1,847024556 | 1,211957696 | 1,232857691 | 1,227607829 |
| <i>Gm766</i>         | 0,481798625  | 1,521479679 | 1,026388068 | 1,205765318 | 0,880889238 |
| <i>Tnfsf11</i>       | 0,405652043  | 1,697535494 | 1,076355983 | 1,262728425 | 0,785627862 |
| <i>AA986860</i>      | 0,545768052  | 1,499650465 | 1,353181049 | 1,319957593 | 0,796091216 |
| <i>Mpi</i>           | 0,664074416  | 1,820654774 | 1,437869842 | 1,66030712  | 0,988742374 |

|                      |             |             |             |             |             |
|----------------------|-------------|-------------|-------------|-------------|-------------|
| <i>Sypl</i>          | 0,559148801 | 1,847909918 | 1,363023098 | 1,638181972 | 1,213994116 |
| <i>1700121N20Rik</i> | 0,763125096 | 1,60536738  | 1,47473628  | 1,636745229 | 0,848498062 |
| <i>Npc1</i>          | 1,262985741 | 1,256177952 | 1,413028148 | 1,375218953 | 1,449866031 |
| <i>Klc3</i>          | 1,274043581 | 1,330826387 | 1,334089731 | 1,484494163 | 1,443859668 |
| <i>Impa1</i>         | 1,245905016 | 1,379985991 | 1,394542378 | 1,411992764 | 1,43916746  |
| <i>Atp6v1g3</i>      | 1,251206502 | 1,428695159 | 1,428550405 | 1,424802712 | 1,466827809 |
| <i>Tex9</i>          | 1,261781801 | 1,458255433 | 1,357871187 | 1,385395762 | 1,37020621  |
| <i>Tuba1c</i>        | 1,194616117 | 1,33847184  | 1,352283933 | 1,321856976 | 1,573977837 |
| <i>Ehmt2</i>         | 1,172363062 | 1,394453731 | 1,325911235 | 1,334528681 | 1,496088277 |
| <i>Btbd19</i>        | 1,257327877 | 1,406098941 | 1,24958313  | 1,348459967 | 1,547639235 |
| <i>Sesn1</i>         | 1,166449792 | 1,37992582  | 1,213534861 | 1,386513708 | 1,445495614 |
| <i>Isg20</i>         | 1,140728945 | 1,449126839 | 1,239744959 | 1,373534689 | 1,529487477 |
| <i>Mapk7</i>         | 1,002467158 | 1,497084644 | 1,228236829 | 1,507286938 | 1,533759098 |
| <i>Hdac5</i>         | 1,024375347 | 1,532104248 | 1,299043237 | 1,456377746 | 1,483629869 |
| <i>Zfp414</i>        | 1,143153406 | 1,581692841 | 1,236537963 | 1,314412316 | 1,580421239 |
| <i>Dapp1</i>         | 1,279974106 | 1,581205477 | 1,507335025 | 1,410891292 | 1,619556939 |
| <i>Hmgn1</i>         | 1,22886531  | 1,495826991 | 1,543212444 | 1,334524282 | 1,660002172 |
| <i>Gm16907</i>       | 1,185625025 | 1,587066377 | 1,459006199 | 1,246336652 | 1,498553921 |
| <i>Camk4</i>         | 1,255177798 | 1,462740887 | 1,639349688 | 1,33288557  | 1,433920558 |
| <i>Eif2ak3</i>       | 1,174400326 | 1,475646139 | 1,629124243 | 1,402346524 | 1,446032596 |
| <i>Hs2st1</i>        | 1,144622914 | 1,476050844 | 1,624446279 | 1,283036503 | 1,418931529 |
| <i>Manba</i>         | 1,23384196  | 1,57709948  | 1,614851472 | 1,3239018   | 1,516843018 |
| <i>Ift80</i>         | 1,155161875 | 1,427607536 | 1,429322556 | 1,316129897 | 1,480841032 |
| <i>Zfpm1</i>         | 1,186733349 | 1,447463813 | 1,42408165  | 1,327821355 | 1,535704156 |
| <i>Lrrc8d</i>        | 1,226403157 | 1,432304515 | 1,448226059 | 1,373063146 | 1,505303929 |
| <i>Mcoln3</i>        | 1,220391267 | 1,455883931 | 1,461692455 | 1,302697446 | 1,426819631 |
| <i>Themis</i>        | 1,182183873 | 1,312543392 | 1,50901126  | 1,242004203 | 1,518007242 |
| <i>Ppp1r10</i>       | 1,186785678 | 1,413424958 | 1,482961447 | 1,264290755 | 1,566654063 |
| <i>Hdc</i>           | 1,015316651 | 1,489275849 | 1,428654193 | 1,300547308 | 1,528650783 |
| <i>Slc16a10</i>      | 1,041365011 | 1,474491239 | 1,439712463 | 1,376499229 | 1,43430023  |
| <i>Tec</i>           | 1,079979302 | 1,530493531 | 1,538805667 | 1,30580154  | 1,45279785  |
| <i>Impdh1</i>        | 1,310581359 | 1,421093993 | 1,529766284 | 1,438049781 | 1,678536123 |
| <i>Rufy2</i>         | 1,273704802 | 1,434797813 | 1,560522615 | 1,436146688 | 1,711688567 |
| <i>Dda1</i>          | 1,237280452 | 1,316325272 | 1,566100989 | 1,416411939 | 1,735874699 |
| <i>Nt5c3l</i>        | 1,109282482 | 1,398061988 | 1,630881287 | 1,412306531 | 1,58458695  |
| <i>Arid2</i>         | 1,097446461 | 1,42930248  | 1,576545404 | 1,416649948 | 1,578954887 |
| <i>E330020D12Rik</i> | 1,161773277 | 1,424505297 | 1,588822133 | 1,454345219 | 1,557954232 |
| <i>Zfp395</i>        | 1,110793872 | 1,341217756 | 1,614489065 | 1,369500259 | 1,555413461 |
| <i>Zbtb3</i>         | 1,35512873  | 1,665472012 | 1,325156735 | 1,251036069 | 1,567766772 |
| <i>InsI6</i>         | 1,306000883 | 1,566121985 | 1,241105558 | 1,085605203 | 1,574447432 |
| <i>Rraga</i>         | 1,168461899 | 1,672182748 | 1,503630334 | 1,043184365 | 1,642041738 |
| <i>2610002D18Rik</i> | 1,179673622 | 1,259552201 | 1,301916685 | 1,289525139 | 1,534009154 |
| <i>Avpi1</i>         | 1,116788514 | 1,318277031 | 1,247893678 | 1,242057535 | 1,539522964 |
| <i>Cabp1</i>         | 1,083195557 | 1,280959617 | 1,412840949 | 1,224378028 | 1,571013724 |
| <i>Rundc1</i>        | 1,094442558 | 1,348246357 | 1,354070454 | 1,250318325 | 1,560129079 |
| <i>Ppcdc</i>         | 1,213846936 | 1,277650265 | 1,355466093 | 1,14459253  | 1,561158224 |
| <i>Ech1</i>          | 1,261674146 | 1,349509818 | 1,401134315 | 1,151174879 | 1,525980584 |
| <i>Slx1b</i>         | 1,128426365 | 1,366228929 | 1,400905968 | 1,156596315 | 1,519767956 |
| <i>Tigd2</i>         | 1,175323231 | 1,351927753 | 1,429246003 | 1,157093222 | 1,514340965 |
| <i>Nup62-il4i1</i>   | 1,098695363 | 1,278353735 | 1,476645519 | 1,214117034 | 1,756867398 |
| <i>Zfp687</i>        | 1,120769341 | 1,265198778 | 1,50249217  | 1,321017638 | 1,773616571 |



|                      |             |             |             |             |             |
|----------------------|-------------|-------------|-------------|-------------|-------------|
| <i>Kif3b</i>         | 1,002908973 | 1,253135174 | 1,514640783 | 1,174702538 | 1,730674917 |
| <i>N4bp2</i>         | 1,104568746 | 1,228150551 | 1,561074284 | 1,297943418 | 1,584726364 |
| <i>Dlst</i>          | 1,082268526 | 1,266626689 | 1,524720406 | 1,343058699 | 1,637805107 |
| <i>4930429B21Rik</i> | 1,19596494  | 1,224566654 | 1,487204982 | 1,281608277 | 1,596580234 |
| <i>Slc24a6</i>       | 1,279148162 | 1,206158767 | 1,452806229 | 1,239733081 | 1,565558155 |
| <i>Ppp1r15b</i>      | 1,269618951 | 1,28123011  | 1,457069111 | 1,317699707 | 1,635185997 |
| <i>Mex3d</i>         | 1,187136935 | 1,239621902 | 1,411496316 | 1,235972333 | 1,653176768 |
| <i>Tead3</i>         | 1,354736436 | 1,165030647 | 1,459547839 | 1,270010839 | 1,691793008 |
| <i>B3gnt9-ps</i>     | 1,266446116 | 1,132831089 | 1,407808957 | 1,282347476 | 1,730132832 |
| <i>Fam38a</i>        | 1,244266302 | 1,090545845 | 1,330803124 | 1,19727641  | 1,731510141 |
| <i>Fbxl8</i>         | 1,202311003 | 1,089823041 | 1,387439844 | 1,149447089 | 1,695467011 |
| <i>Ankrd9</i>        | 1,36617688  | 1,202424579 | 1,405123475 | 1,357696487 | 1,804145778 |
| <i>4933403G14Rik</i> | 1,367786196 | 1,180367016 | 1,368026077 | 1,286991035 | 1,831098038 |
| <i>Esrra</i>         | 1,300727218 | 1,283548123 | 1,382080538 | 1,353225469 | 1,786729011 |
| <i>Bst2</i>          | 1,263515178 | 1,241561168 | 1,447513693 | 1,230477955 | 1,894070751 |
| <i>Rxrb</i>          | 1,256401235 | 1,167919938 | 1,479588347 | 1,306368892 | 1,870312316 |
| <i>Zmiz2</i>         | 1,253472087 | 1,351119785 | 1,428997651 | 1,235260015 | 1,830797909 |
| <i>Fcho1</i>         | 1,315286914 | 1,270151413 | 1,446702971 | 1,248194676 | 1,780106755 |
| <i>Slc11a1</i>       | 1,208906934 | 1,231095054 | 1,544985111 | 1,029161054 | 1,671893158 |
| <i>2310061C15Rik</i> | 1,249491661 | 1,288841971 | 1,606753266 | 1,116745339 | 1,682850247 |
| <i>Pgpep1l</i>       | 1,34412764  | 1,276026707 | 1,496305041 | 1,119129613 | 1,64808359  |
| <i>Map3k8</i>        | 1,265674219 | 1,290193269 | 1,453108614 | 1,0513989   | 1,66915126  |
| <i>Tmem120b</i>      | 1,406305625 | 1,305361653 | 1,64989325  | 1,12266525  | 1,692632281 |
| <i>Hilpda</i>        | 1,384891029 | 1,351223239 | 1,619401705 | 1,250083557 | 1,683454743 |
| <i>Cbx6</i>          | 1,413644985 | 1,380694663 | 1,513468541 | 1,148347578 | 1,746767927 |
| <i>Gas2l1</i>        | 1,389467176 | 1,209471171 | 1,430682167 | 1,206557476 | 1,44109221  |
| <i>Lrrc8b</i>        | 1,38328978  | 1,249826139 | 1,467468552 | 1,276720121 | 1,485930157 |
| <i>Slc12a3</i>       | 1,429535517 | 1,235466476 | 1,423791915 | 1,248212021 | 1,525908283 |
| <i>Hs6st1</i>        | 1,397667221 | 1,219760738 | 1,395616624 | 1,219885568 | 1,543860897 |
| <i>Nek8</i>          | 1,356352276 | 1,357744897 | 1,477027099 | 1,194934083 | 1,581809652 |
| <i>Pkm</i>           | 0,720364082 | 1,240114422 | 1,378937922 | 1,418555039 | 1,354055096 |
| <i>Itpr1l1</i>       | 0,72124365  | 1,211400908 | 1,329519748 | 1,519978682 | 1,339033868 |
| <i>Ankrd46</i>       | 0,772663066 | 1,329745526 | 1,306716206 | 1,538429475 | 1,290650177 |
| <i>Ctage5</i>        | 0,868863255 | 1,374742308 | 1,24500382  | 1,505272578 | 1,442949009 |
| <i>Cyp4f17</i>       | 0,782372696 | 1,265841874 | 1,188713294 | 1,4200169   | 1,509984544 |
| <i>Twsg1</i>         | 0,975596362 | 1,350717167 | 1,329139389 | 1,416343815 | 1,346478054 |
| <i>Hspbap1</i>       | 1,01260578  | 1,326561701 | 1,24251212  | 1,439534114 | 1,417515624 |
| <i>Lclat1</i>        | 0,919332119 | 1,346705996 | 1,315200137 | 1,347155971 | 1,403073272 |
| <i>Aak1</i>          | 0,883909482 | 1,344811729 | 1,27978343  | 1,418878798 | 1,442074008 |
| <i>Tlk1</i>          | 0,99152782  | 1,281374492 | 1,302312177 | 1,300745264 | 1,36178368  |
| <i>Gm1647</i>        | 1,019384489 | 1,310939487 | 1,28420076  | 1,302257042 | 1,344558326 |
| <i>Anks1</i>         | 1,050441272 | 1,344085501 | 1,318222937 | 1,344230936 | 1,378178682 |
| <i>Lif</i>           | 0,990122006 | 1,16902254  | 1,239387613 | 1,309094386 | 1,440464166 |
| <i>Top2a</i>         | 0,981256489 | 1,125522078 | 1,235150355 | 1,391034338 | 1,358930248 |
| <i>Atf6b</i>         | 1,037375605 | 1,255974429 | 1,13833056  | 1,379664561 | 1,366345873 |
| <i>4930539E08Rik</i> | 0,97648419  | 1,15217232  | 1,394044709 | 1,267233382 | 1,277039252 |
| <i>H2afv</i>         | 0,884536353 | 1,005430768 | 1,428455505 | 1,309606044 | 1,316614098 |
| <i>Actn4</i>         | 0,944670211 | 1,105345699 | 1,351709926 | 1,180741308 | 1,37847961  |
| <i>Papd7</i>         | 0,948091743 | 1,102145983 | 1,406491272 | 1,259660399 | 1,454588981 |
| <i>Grina</i>         | 0,984290255 | 1,072723604 | 1,365677505 | 1,422120923 | 1,428826365 |
| <i>1600027N09Rik</i> | 0,997415993 | 1,078118509 | 1,428958022 | 1,383001857 | 1,494419158 |

|                      |             |             |             |             |             |
|----------------------|-------------|-------------|-------------|-------------|-------------|
| <i>Gabbr2</i>        | 0,860911537 | 1,149681013 | 1,38842663  | 1,431260115 | 1,45350008  |
| <i>Stmn1</i>         | 1,047256003 | 1,098159512 | 1,377647113 | 1,312594407 | 1,398215921 |
| <i>Letm2</i>         | 1,083966781 | 1,0834433   | 1,271148166 | 1,301754952 | 1,395249811 |
| <i>1700029G01Rik</i> | 1,14121096  | 1,167688434 | 1,414190769 | 1,322723591 | 1,449481771 |
| <i>Fbxo42</i>        | 1,135285612 | 1,152362063 | 1,360608315 | 1,290664438 | 1,476567253 |
| <i>Impdh2</i>        | 1,131450893 | 1,062825116 | 1,307426413 | 1,459039098 | 1,358292881 |
| <i>A630072M18Rik</i> | 0,975675777 | 1,436397628 | 1,430367877 | 1,574128835 | 1,638322835 |
| <i>Mapk3</i>         | 1,028761297 | 1,391680459 | 1,508291101 | 1,505563256 | 1,665785175 |
| <i>Cstad</i>         | 1,136984381 | 1,437934815 | 1,361472839 | 1,554242798 | 1,618201697 |
| <i>Thada</i>         | 1,063148098 | 1,338471847 | 1,457489127 | 1,396584821 | 1,606450407 |
| <i>Prps1l3</i>       | 1,02536191  | 1,322178654 | 1,379742288 | 1,450251715 | 1,694697056 |
| <i>Pdlim2</i>        | 1,010925797 | 1,335954821 | 1,545496037 | 1,620313667 | 1,579115519 |
| <i>Gatsl3</i>        | 0,936262863 | 1,308355607 | 1,516595131 | 1,653064074 | 1,462365805 |
| <i>Sardh</i>         | 1,056966593 | 1,27466123  | 1,555527613 | 1,274906784 | 1,457324435 |
| <i>Birc2</i>         | 0,976427862 | 1,3391856   | 1,585620114 | 1,312027878 | 1,556757188 |
| <i>Map3k12</i>       | 0,930605717 | 1,41947238  | 1,579748368 | 1,275446056 | 1,441877112 |
| <i>Mxi1</i>          | 1,080072779 | 1,422949031 | 1,567220435 | 1,431353205 | 1,393472413 |
| <i>Ccnb1</i>         | 0,981877382 | 1,368309462 | 1,669322991 | 1,395451406 | 1,435013245 |
| <i>Upb1</i>          | 1,008081286 | 1,255711447 | 1,368870201 | 1,387695718 | 1,438376563 |
| <i>Traf2</i>         | 1,006695626 | 1,288186965 | 1,386977202 | 1,382102472 | 1,403334467 |
| <i>Arl16</i>         | 1,010997501 | 1,295503901 | 1,34444426  | 1,395849814 | 1,4804601   |
| <i>Nisch</i>         | 1,014970183 | 1,326185054 | 1,369665682 | 1,353820795 | 1,399836946 |
| <i>Unc45a</i>        | 1,032956486 | 1,318555936 | 1,37026635  | 1,372762833 | 1,442196282 |
| <i>Ctsb</i>          | 1,001617003 | 1,391222412 | 1,380513456 | 1,343399629 | 1,440996682 |
| <i>Fbxo25</i>        | 0,971442167 | 1,264671885 | 1,472534615 | 1,368499447 | 1,389597979 |
| <i>Zfp668</i>        | 1,028844073 | 1,408709745 | 1,50344986  | 1,352116975 | 1,507855022 |
| <i>Sdhb</i>          | 1,000634368 | 1,387368669 | 1,526716421 | 1,374955538 | 1,489672992 |
| <i>Cdkn2aipnl</i>    | 1,042399956 | 1,37722771  | 1,482014022 | 1,41465837  | 1,472761149 |
| <i>Taok3</i>         | 0,974706735 | 1,405759564 | 1,448607602 | 1,437181917 | 1,554416076 |
| <i>Zfp553</i>        | 1,050252162 | 1,159511637 | 1,316603227 | 1,32320238  | 1,5210489   |
| <i>Srpk2</i>         | 1,089322009 | 1,177480898 | 1,319697449 | 1,362620004 | 1,632197854 |
| <i>Syvn1</i>         | 1,068017241 | 1,205589867 | 1,316449274 | 1,524705579 | 1,573667576 |
| <i>Mrps24</i>        | 1,060726739 | 1,186408082 | 1,270534723 | 1,465793639 | 1,627492356 |
| <i>Rnf139</i>        | 0,916297764 | 1,306354329 | 1,281717997 | 1,378766044 | 1,594356205 |
| <i>Zc3h12d</i>       | 0,953403109 | 1,251782824 | 1,280254471 | 1,384600384 | 1,669995944 |
| <i>Pml</i>           | 0,882328134 | 1,193558489 | 1,293978704 | 1,377526634 | 1,580083471 |
| <i>C80913</i>        | 0,819832755 | 1,245020292 | 1,497746569 | 1,406147966 | 1,666621534 |
| <i>Plekha2</i>       | 0,800177505 | 1,196195285 | 1,434481206 | 1,414486561 | 1,683256303 |
| <i>Rnf2</i>          | 0,874997487 | 1,196703805 | 1,529553904 | 1,378419378 | 1,704728874 |
| <i>Acot8</i>         | 0,878957871 | 1,252001757 | 1,404359548 | 1,394911576 | 1,751825595 |
| <i>Ap1m2</i>         | 0,932107763 | 1,253638631 | 1,38709393  | 1,430812937 | 1,689927803 |
| <i>Bahd1</i>         | 0,881003422 | 1,274390765 | 1,528815721 | 1,367028953 | 1,655795561 |
| <i>Wdr20a</i>        | 0,942929112 | 1,258827737 | 1,499643973 | 1,314730278 | 1,6549675   |
| <i>Preb</i>          | 0,882804763 | 1,232044099 | 1,476996821 | 1,333477245 | 1,581421693 |
| <i>E2f3</i>          | 0,947923647 | 1,330130611 | 1,401353643 | 1,27456327  | 1,505591227 |
| <i>Tac4</i>          | 0,943418623 | 1,307373807 | 1,382451493 | 1,27809311  | 1,500317094 |
| <i>Iffo2</i>         | 0,933401365 | 1,37089187  | 1,411576492 | 1,289911388 | 1,456286313 |
| <i>Uvrag</i>         | 0,930331934 | 1,374372788 | 1,413342382 | 1,305849484 | 1,443264948 |
| <i>Reep3</i>         | 0,830901929 | 1,280670027 | 1,397799229 | 1,292564147 | 1,54420929  |
| <i>Lta4h</i>         | 0,816916126 | 1,33063484  | 1,370920066 | 1,25802106  | 1,550036259 |
| <i>Scamp2</i>        | 0,901869431 | 1,263125522 | 1,322841142 | 1,202954933 | 1,491737715 |

|                      |             |             |             |             |             |
|----------------------|-------------|-------------|-------------|-------------|-------------|
| <i>Slc23a2</i>       | 0,831339481 | 1,256360609 | 1,327787765 | 1,19746652  | 1,449000851 |
| <i>Ece1</i>          | 0,930406698 | 1,254837434 | 1,360459988 | 1,270998738 | 1,387035498 |
| <i>Itm2c</i>         | 0,8911206   | 1,328886147 | 1,138297354 | 1,380114103 | 1,547449258 |
| <i>A330035P11Rik</i> | 0,924602464 | 1,365427055 | 1,235415809 | 1,341437589 | 1,500516797 |
| <i>Mrps21</i>        | 0,813033104 | 1,406218634 | 1,125680002 | 1,255095259 | 1,494311906 |
| <i>Trim21</i>        | 0,762286645 | 1,439229729 | 1,332099997 | 1,246665147 | 1,6337304   |
| <i>2610035D17Rik</i> | 0,674502479 | 1,356681065 | 1,323359351 | 1,374398716 | 1,620757041 |
| <i>Dennd4b</i>       | 0,873133463 | 1,350719414 | 1,306694414 | 1,373012355 | 1,652602114 |
| <i>Lmna</i>          | 0,820405836 | 1,327689259 | 1,329173807 | 1,405587708 | 1,62663354  |
| <i>E430018J23Rik</i> | 0,786804373 | 1,431975789 | 1,282721165 | 1,389128358 | 1,600417205 |
| <i>Atp6v1e1</i>      | 0,777160134 | 1,36556996  | 1,403082773 | 1,353441684 | 1,46862886  |
| <i>Enoph1</i>        | 0,732365438 | 1,364596783 | 1,396939169 | 1,363436891 | 1,506554647 |
| <i>Ppp1r13b</i>      | 0,778797618 | 1,322146478 | 1,331079828 | 1,37834647  | 1,4597434   |
| <i>Tbc1d10a</i>      | 0,837130231 | 1,359774886 | 1,449835334 | 1,363443325 | 1,494266279 |
| <i>Sufu</i>          | 0,87558031  | 1,389203497 | 1,371529701 | 1,396317733 | 1,463818144 |
| <i>Atg12</i>         | 0,833281971 | 1,345019465 | 1,499037534 | 1,092338357 | 1,592619235 |
| <i>Zfp839</i>        | 0,930889294 | 1,252981219 | 1,489150608 | 1,096381931 | 1,552138908 |
| <i>Tmed7</i>         | 0,96847072  | 1,350564308 | 1,430529787 | 1,090912502 | 1,585443123 |
| <i>Gfod1</i>         | 0,947278563 | 1,388857292 | 1,485588831 | 1,149573254 | 1,632787666 |
| <i>Erc2</i>          | 0,930046605 | 1,412173315 | 1,233644353 | 0,99458634  | 1,524102921 |
| <i>Il4i1</i>         | 0,830068085 | 1,337111177 | 1,3132114   | 1,007034151 | 1,585146975 |
| <i>Scaf1</i>         | 0,844402007 | 0,981254799 | 1,279670623 | 1,215782957 | 1,597656582 |
| <i>Gga3</i>          | 0,8336519   | 0,997644094 | 1,376607267 | 1,188798699 | 1,60810174  |
| <i>Eno2</i>          | 0,853896772 | 0,89782469  | 1,437804147 | 1,206533907 | 1,592994495 |
| <i>Tenc1</i>         | 0,787160708 | 0,956170469 | 1,347754836 | 1,240937318 | 1,485606298 |
| <i>Apeh</i>          | 0,778136067 | 0,972040761 | 1,292397599 | 1,234183246 | 1,497654756 |
| <i>4930486L24Rik</i> | 0,856240781 | 0,8810765   | 1,27262611  | 1,263948301 | 1,464610277 |
| <i>Bsg</i>           | 0,863313136 | 1,037118986 | 1,390149188 | 1,283357865 | 1,51325667  |
| <i>Serinc3</i>       | 0,91372381  | 1,066526783 | 1,332516305 | 1,285663299 | 1,517592519 |
| <i>Apbb1ip</i>       | 0,840511404 | 1,112469475 | 1,412496509 | 1,296254548 | 1,501157004 |
| <i>Zfp879</i>        | 0,901689011 | 1,030752815 | 1,403195391 | 1,18542842  | 1,509966612 |
| <i>Tfap4</i>         | 1,089955333 | 0,975351326 | 1,209771577 | 1,144026089 | 1,487639289 |
| <i>Dnmt1</i>         | 1,011427112 | 0,945571667 | 1,209872636 | 1,159126382 | 1,474438298 |
| <i>Tinf2</i>         | 0,985253449 | 0,954144007 | 1,254410976 | 1,205058085 | 1,379120684 |
| <i>Lass2</i>         | 0,99607966  | 0,926915326 | 1,217649094 | 1,377585352 | 1,448930577 |
| <i>Arid3a</i>        | 0,961223263 | 0,970126953 | 1,282128274 | 1,283845761 | 1,51934591  |
| <i>Pigv</i>          | 0,86576891  | 1,15475286  | 1,144981963 | 1,298457709 | 1,696559377 |
| <i>Pkn1</i>          | 0,912562533 | 1,25722393  | 1,181473435 | 1,257197105 | 1,645955328 |
| <i>AK010878</i>      | 0,947507181 | 1,073413195 | 1,212724315 | 1,288073948 | 1,646962787 |
| <i>Tmem134</i>       | 0,947772142 | 1,086639432 | 1,170739946 | 1,247640868 | 1,584782909 |
| <i>Pias4</i>         | 0,982363907 | 1,145764637 | 1,191916661 | 1,193750719 | 1,728541928 |
| <i>Slc39a1</i>       | 0,886509464 | 1,12369175  | 1,240579596 | 1,196896798 | 1,801841411 |
| <i>1110008J03Rik</i> | 0,947971793 | 1,13260226  | 1,141053517 | 1,24211685  | 1,794648497 |
| <i>Sgsh</i>          | 0,972589069 | 1,0836595   | 1,163278897 | 1,306628692 | 1,780652637 |
| <i>Ctsz</i>          | 1,004467576 | 1,041672949 | 1,399501757 | 1,24243064  | 1,566266407 |
| <i>Hnrnpf</i>        | 1,075691193 | 1,10061419  | 1,426389821 | 1,230605058 | 1,600590635 |
| <i>Gm5868</i>        | 1,033187947 | 1,087005284 | 1,306787386 | 1,24271246  | 1,550780311 |
| <i>Akirin1</i>       | 0,972515521 | 1,086681609 | 1,308489107 | 1,18220565  | 1,579938052 |
| <i>Tmem86b</i>       | 1,042624187 | 1,10866622  | 1,377762636 | 1,090914816 | 1,597554008 |
| <i>Rexo1</i>         | 1,109293066 | 0,996394499 | 1,272946998 | 1,226239418 | 1,632350837 |
| <i>Gm11974</i>       | 1,01671312  | 1,045645945 | 1,234444719 | 1,133562307 | 1,639748994 |

|                      |             |             |             |             |             |
|----------------------|-------------|-------------|-------------|-------------|-------------|
| <i>Atp5h</i>         | 1,167460139 | 0,981902312 | 1,739835523 | 1,205518186 | 1,426092878 |
| <i>Arl4a</i>         | 1,29508748  | 0,916567781 | 1,647685854 | 1,292409283 | 1,325280882 |
| <i>Zfp161</i>        | 1,094453885 | 0,938882057 | 1,518848868 | 1,1866037   | 1,440495369 |
| <i>Cfl2</i>          | 0,87387098  | 0,975179816 | 1,718385302 | 1,198461857 | 1,418414728 |
| <i>Srp14</i>         | 0,980107776 | 0,866158561 | 1,684113878 | 1,22235612  | 1,258916026 |
| <i>Rnf126</i>        | 0,984783493 | 1,108391165 | 1,547756907 | 1,153684614 | 1,555286212 |
| <i>Nop56</i>         | 1,041358722 | 1,199087101 | 1,564331418 | 1,234316899 | 1,592176075 |
| <i>Capn12</i>        | 1,186417783 | 1,082219796 | 1,515892277 | 1,179301388 | 1,624443793 |
| <i>Gp5</i>           | 1,143672699 | 1,132409969 | 1,440278448 | 1,137015838 | 1,596754638 |
| <i>Lypd3</i>         | 1,131354898 | 1,135666039 | 1,637279254 | 1,108782149 | 1,55762992  |
| <i>Prss53</i>        | 1,158235887 | 1,18950866  | 1,697949434 | 1,120479329 | 1,538580056 |
| <i>Arf6</i>          | 1,09010166  | 1,133085854 | 1,535704628 | 1,05950267  | 1,464430256 |
| <i>Fbxw4</i>         | 1,106046079 | 1,094804822 | 1,498394915 | 1,148980315 | 1,413024174 |
| <i>Prkcb</i>         | 1,175741185 | 1,190392297 | 1,441423657 | 1,048636447 | 1,464246032 |
| <i>Ntpcr</i>         | 1,36083068  | 1,068410848 | 1,503075074 | 1,289116393 | 1,406208904 |
| <i>Tmem102</i>       | 1,377926241 | 1,091809163 | 1,546048297 | 1,304211225 | 1,401666441 |
| <i>Tigd5</i>         | 1,44035263  | 1,032551871 | 1,581949571 | 1,403222493 | 1,516760743 |
| <i>Cd3eap</i>        | 1,379739578 | 1,120606485 | 1,639443942 | 1,505341471 | 1,249430408 |
| <i>Dnajc4</i>        | 1,277007849 | 1,084631968 | 1,52355879  | 1,595433106 | 1,316828507 |
| <i>C030044B11Rik</i> | 1,321755463 | 1,178798293 | 1,921790996 | 1,421489714 | 1,52631489  |
| <i>Ino80b</i>        | 1,238472307 | 1,139774774 | 1,865459471 | 1,449310308 | 1,346805383 |
| <i>B4galnt4</i>      | 1,047135727 | 1,437671461 | 1,506498906 | 1,251291136 | 1,869736622 |
| <i>Plec</i>          | 1,081048928 | 1,40187956  | 1,449958278 | 1,421479906 | 1,901946387 |
| <i>Klf6</i>          | 0,988574647 | 1,356736688 | 1,526733421 | 1,395367844 | 2,009659506 |
| <i>Zfp646</i>        | 1,014319059 | 1,348127901 | 1,653776565 | 1,388988722 | 1,946892133 |
| <i>Tmem200b</i>      | 1,146058206 | 1,503647666 | 1,398570581 | 1,355012267 | 2,063429022 |
| <i>Dnajb13</i>       | 1,013641803 | 1,259837004 | 1,338259309 | 1,230466269 | 1,816685479 |
| <i>Cmah</i>          | 0,98097063  | 1,221743326 | 1,388339951 | 1,277171726 | 1,795161225 |
| <i>Psmc3ip</i>       | 1,013702658 | 1,395437169 | 1,377965964 | 1,222286824 | 1,791626973 |
| <i>Cnih</i>          | 1,006796271 | 1,367357717 | 1,332259777 | 1,276186331 | 1,807994077 |
| <i>Gnptg</i>         | 0,854523259 | 1,300320397 | 1,385089046 | 1,288850274 | 1,872313549 |
| <i>Pank4</i>         | 0,876335092 | 1,243423639 | 1,38761272  | 1,315734947 | 1,845722417 |
| <i>Pdp2</i>          | 0,891946223 | 1,324760419 | 1,405666327 | 1,3660021   | 1,940814083 |
| <i>Snrpd3</i>        | 0,857526414 | 1,376965378 | 1,53079037  | 1,486487558 | 1,880329769 |
| <i>Slc37a4</i>       | 0,875614089 | 1,478606276 | 1,50446565  | 1,471577051 | 1,94433192  |
| <i>Mcmbp</i>         | 0,887717884 | 1,397097741 | 1,571967363 | 1,666042247 | 1,917312504 |
| <i>Usf1</i>          | 0,954953146 | 1,357455161 | 1,506033194 | 1,624483485 | 1,939013303 |
| <i>Ssh3</i>          | 1,144471766 | 1,43989755  | 1,513859996 | 1,603020031 | 1,93619245  |
| <i>Leng8</i>         | 1,098108629 | 1,397706811 | 1,412582057 | 1,632046021 | 1,946073996 |
| <i>Msto1</i>         | 1,111786242 | 1,299831952 | 1,438897916 | 1,55958417  | 1,932237639 |
| <i>Rtp3</i>          | 1,068120692 | 1,356966398 | 1,479591108 | 1,625860442 | 1,752978723 |
| <i>Gipc1</i>         | 1,049469091 | 1,290021861 | 1,469856093 | 1,601290811 | 1,799131234 |
| <i>Pdk1</i>          | 1,078590225 | 1,326475094 | 1,563659445 | 1,610415276 | 1,714549507 |
| <i>Psmb3</i>         | 0,899769936 | 1,341131305 | 1,524080937 | 1,657629128 | 1,738286035 |
| <i>Prkab1</i>        | 1,012309063 | 1,216348666 | 1,434378799 | 1,459878552 | 1,739447427 |
| <i>Agxt2l2</i>       | 1,006502533 | 1,26750819  | 1,42106261  | 1,49456556  | 1,81544559  |
| <i>Tnfrsf14</i>      | 0,98754789  | 1,183252939 | 1,51254546  | 1,487822238 | 1,796866974 |
| <i>Mppe1</i>         | 0,970020272 | 1,296452332 | 1,527652516 | 1,395747547 | 1,703999842 |
| <i>Tmem206</i>       | 0,983017086 | 1,279031449 | 1,511053074 | 1,37052274  | 1,757988301 |
| <i>Ccdc69</i>        | 1,023676512 | 1,285391445 | 1,475257922 | 1,426918776 | 1,710291205 |
| <i>Pld3</i>          | 1,192708565 | 1,390320169 | 1,768683502 | 1,36938151  | 1,842010614 |

|                       |             |             |             |             |             |
|-----------------------|-------------|-------------|-------------|-------------|-------------|
| <i>Ninj2</i>          | 1,191017856 | 1,419463774 | 1,754317665 | 1,46029043  | 1,834393981 |
| <i>Irs2</i>           | 1,081903742 | 1,488374326 | 1,79757915  | 1,316903197 | 1,823943034 |
| <i>Ube2d1</i>         | 1,111189288 | 1,525263093 | 1,632363707 | 1,477323978 | 1,85529407  |
| <i>Ralbp1</i>         | 1,111817292 | 1,415000263 | 1,620155159 | 1,447805408 | 1,823823824 |
| <i>Doc2a</i>          | 1,022493515 | 1,386781308 | 1,609010548 | 1,31688502  | 1,836676172 |
| <i>Zcchc2</i>         | 1,003499715 | 1,368444515 | 1,655638943 | 1,291479918 | 1,717041519 |
| <i>Exosc2</i>         | 1,068606062 | 1,291176266 | 1,660059775 | 1,375246521 | 1,759856843 |
| <i>Ccdc12</i>         | 1,124534442 | 1,317191146 | 1,571414025 | 1,40179858  | 1,773606115 |
| <i>Tyropb</i>         | 1,14987006  | 1,397727983 | 1,75003118  | 1,203456282 | 1,726067398 |
| <i>Mxra7</i>          | 1,168365157 | 1,317676628 | 1,668727916 | 1,19772363  | 1,755972163 |
| <i>Gtf2ird2</i>       | 1,230195122 | 1,324115071 | 1,799917508 | 1,244769556 | 1,707976396 |
| <i>Aagab</i>          | 1,29817903  | 1,422195504 | 1,72037151  | 1,169361844 | 1,835451439 |
| <i>Txn1</i>           | 1,248627769 | 1,223333804 | 1,613007687 | 1,305150615 | 1,834214635 |
| <i>Glrp1</i>          | 1,116979333 | 1,255358418 | 1,70525923  | 1,252594525 | 1,837642498 |
| <i>Wbp11</i>          | 0,960233793 | 1,181152512 | 1,833443638 | 1,285947184 | 1,743213832 |
| <i>Dhps</i>           | 1,054469057 | 1,017874069 | 1,696457802 | 1,365139604 | 1,886682088 |
| <i>Nosip</i>          | 1,059626892 | 1,232578426 | 1,745113193 | 1,21027172  | 1,999352538 |
| <i>P2rx7</i>          | 0,977177481 | 1,509460801 | 1,467810169 | 1,461140674 | 1,581800235 |
| <i>Slc7a1</i>         | 1,066166128 | 1,564422324 | 1,466008143 | 1,487922651 | 1,60783944  |
| <i>Por</i>            | 0,989938003 | 1,670996291 | 1,516182106 | 1,492179187 | 1,544808121 |
| <i>Rere</i>           | 0,993491997 | 1,493830959 | 1,455596145 | 1,454405397 | 1,494722876 |
| <i>Sik3</i>           | 0,920602212 | 1,498397127 | 1,484367242 | 1,465073853 | 1,460801018 |
| <i>Hbs1l</i>          | 0,913044382 | 1,519781969 | 1,566886466 | 1,390880577 | 1,54286586  |
| <i>Mkrn1</i>          | 0,906808464 | 1,502683161 | 1,562034994 | 1,447771363 | 1,521083503 |
| <i>Cand1</i>          | 1,053291186 | 1,500435622 | 1,605728571 | 1,544958746 | 1,63243526  |
| <i>Jmjd8</i>          | 1,037760176 | 1,491894796 | 1,59699136  | 1,482081829 | 1,580677004 |
| <i>Slc5a3</i>         | 0,93234223  | 1,555202877 | 1,601010984 | 1,524666726 | 1,616895362 |
| <i>Ndufb4</i>         | 0,91825098  | 1,522895567 | 1,702932102 | 1,533663381 | 1,596078408 |
| <i>Arl8b</i>          | 0,996482838 | 1,478173666 | 1,687455187 | 1,556252794 | 1,558835476 |
| <i>Rapsn</i>          | 0,997559674 | 1,619319386 | 1,661260528 | 1,532403289 | 1,643218037 |
| <i>Ccdc90a</i>        | 1,025633509 | 1,643937211 | 1,727877343 | 1,543039518 | 1,649026588 |
| <i>Susd1</i>          | 1,081588938 | 1,686482885 | 1,536631913 | 1,464229721 | 1,591894825 |
| <i>Lrp10</i>          | 1,169871564 | 1,657727095 | 1,573953203 | 1,439243751 | 1,589866265 |
| <i>Tufm</i>           | 1,060459937 | 1,662885119 | 1,528733001 | 1,509850602 | 1,768243055 |
| <i>Donson</i>         | 0,9605881   | 1,754039969 | 1,486737152 | 1,354490183 | 1,623775105 |
| <i>Creb3</i>          | 0,616694946 | 1,649097098 | 1,616174918 | 1,410972823 | 1,538731241 |
| <i>Spcs3</i>          | 0,719371883 | 1,709747067 | 1,550664161 | 1,525153976 | 1,54193561  |
| <i>Qsox1</i>          | 0,786070587 | 1,641857711 | 1,631799965 | 1,387284078 | 1,392699361 |
| <i>Z810046L04Rik</i>  | 0,802919976 | 1,588325524 | 1,625464905 | 1,38632044  | 1,664418593 |
| <i>Slc3a2</i>         | 0,803568404 | 1,524579172 | 1,622677088 | 1,337386062 | 1,643098003 |
| <i>Jarid2</i>         | 0,695665395 | 1,491840137 | 1,562403315 | 1,431382048 | 1,62127426  |
| <i>Ppp6r1</i>         | 1,049823257 | 1,492366917 | 1,67356069  | 1,287716432 | 1,710630933 |
| <i>Foxj2</i>          | 1,008993656 | 1,496746751 | 1,597499368 | 1,407649933 | 1,676048244 |
| <i>Alkbh2</i>         | 0,924061543 | 1,618909228 | 1,590788096 | 1,336918355 | 1,756233163 |
| <i>Rxfp4</i>          | 0,857283118 | 1,559973953 | 1,537658241 | 1,132651957 | 1,785718632 |
| <i>Cstf2t</i>         | 0,877146996 | 1,588426773 | 1,504303634 | 1,215189878 | 1,792024925 |
| <i>Pex12</i>          | 0,962181257 | 1,699809716 | 1,634201668 | 1,359737633 | 1,913958818 |
| <i>Z1810046J19Rik</i> | 1,019844787 | 1,734884138 | 1,733850422 | 1,272594936 | 1,883470967 |
| <i>Tcap</i>           | 0,526147611 | 1,445428375 | 1,51746602  | 0,603252346 | 1,315169412 |
| <i>Rpl10a</i>         | 0,540244352 | 1,45398933  | 1,321843428 | 0,751634599 | 1,438461736 |
| <i>Ikzf2</i>          | 0,749240762 | 1,200011108 | 1,754992201 | 0,627558779 | 1,639558618 |

|                      |              |             |             |             |             |
|----------------------|--------------|-------------|-------------|-------------|-------------|
| <i>Cnpy2</i>         | 0,883110239  | 1,35503134  | 1,617231331 | 1,177737419 | 1,327666752 |
| <i>Mxd4</i>          | 0,742385558  | 1,360598233 | 1,532815148 | 1,13420921  | 1,327262854 |
| <i>Ifi27l2a</i>      | 0,707365611  | 1,462042702 | 1,626181844 | 0,933982273 | 1,208578882 |
| <i>Atat1</i>         | 0,698447764  | 1,395465198 | 1,72240155  | 1,014051735 | 1,61747302  |
| <i>Chmp1b</i>        | 0,848323867  | 1,327636655 | 1,750482387 | 1,145329961 | 1,59278935  |
| <i>Myo1c</i>         | 1,150811199  | 0,99022696  | 1,354540343 | 0,815957226 | 1,405227685 |
| <i>Ankrd60</i>       | 1,247168122  | 0,958493543 | 1,39147285  | 0,846211754 | 1,411252111 |
| <i>Rgs16</i>         | 1,155959301  | 1,171535856 | 1,564399564 | 0,701911877 | 1,514476462 |
| <i>Dnajb3</i>        | 1,067393595  | 0,904849171 | 1,470550168 | 0,629887656 | 1,570843392 |
| <i>Gja8</i>          | 0,834768694  | 0,918371422 | 1,48954383  | 0,619168031 | 1,456763708 |
| <i>Exoc3l</i>        | 1,027286741  | 1,060361676 | 1,492107139 | 0,798460511 | 1,41566829  |
| <i>Gpr55</i>         | 0,874094023  | 0,944665259 | 1,5389218   | 0,870918905 | 1,487118362 |
| <i>Afap1</i>         | 0,963259272  | 0,928806385 | 1,389601012 | 0,772674972 | 1,141667994 |
| <i>Hsd17b11</i>      | 1,033802621  | 0,948881019 | 1,279288029 | 0,74743216  | 1,150926688 |
| <i>Hsd17b1</i>       | 1,152011528  | 0,965587695 | 1,425695882 | 0,756351136 | 1,132425676 |
| <i>Atp5k</i>         | 0,931174916  | 1,15364057  | 1,464292075 | 0,837093252 | 1,177034123 |
| <i>Gm17746</i>       | 0,96618381   | 1,933270484 | 1,785630569 | 1,137257816 | 1,03568502  |
| <i>Il2rg</i>         | 1,072335476  | 1,843258122 | 1,778962074 | 0,951134593 | 1,159116254 |
| <i>Clec2d</i>        | 0,400028296  | 1,594121919 | 2,172525002 | 1,246186623 | 1,471146182 |
| <i>Arl14</i>         | 0,783322636  | 1,634202539 | 0,815568312 | 1,772697743 | 0,895581493 |
| <i>1810009A15Rik</i> | 0,737501388  | 1,277802564 | 0,805200771 | 1,766637948 | 1,038116769 |
| <i>Gdf9</i>          | 0,883999875  | 1,451339997 | 1,11460111  | 1,886140102 | 1,085217772 |
| <i>Nudt17</i>        | 0,851113262  | 1,474361407 | 0,971628947 | 1,686975074 | 1,154511247 |
| <i>Dnajc30</i>       | 1,424922728  | 1,174847377 | 0,930136449 | 2,18009489  | 0,829836087 |
| <i>St3gal2</i>       | 1,068928177  | 2,24558042  | 1,352588392 | 1,978798857 | 1,055532519 |
| <i>Abra</i>          | 1,006754953  | 1,863119791 | 0,99850936  | 1,725722672 | 1,098649522 |
| <i>Il21</i>          | 0,079159271  | 1,656981238 | 0,207825734 | 2,009452603 | 0,494316196 |
| <i>Tmem64</i>        | 0,253253533  | 1,722974554 | 0,74093015  | 1,862838946 | 0,954934439 |
| <i>Hs3st3b1</i>      | 0,02797027   | 1,408320904 | 0,641548792 | 2,342141579 | 1,575706731 |
| <i>Igfbp4</i>        | 0,314397516  | 1,330663066 | 1,102341179 | 2,709337401 | 1,955122682 |
| <i>Dynlt1f</i>       | -2,239046644 | 1,757586556 | 0           | 2,484424321 | 2,989876519 |
| <i>Dynlt1c</i>       | -2,258084694 | 1,774612081 | 0           | 2,504256813 | 3,010974929 |
| <i>Cul3</i>          | 0,211038531  | 1,41149022  | 1,470830538 | 1,514192002 | 1,589743527 |
| <i>Xaf1</i>          | 0,11156157   | 1,461922862 | 1,451544062 | 1,590741341 | 1,657862877 |
| <i>Golph3</i>        | 0,353273053  | 1,394955555 | 1,466321061 | 1,633091049 | 1,725343675 |
| <i>Birc3</i>         | 0,365363451  | 1,387968356 | 1,460453452 | 1,573146937 | 1,673849687 |
| <i>Gt(ROSA)26Sor</i> | 0,344536429  | 1,446218733 | 1,471742603 | 1,598194388 | 1,603580517 |
| <i>Pabpc1</i>        | 0,154122748  | 1,200465495 | 1,507031605 | 1,765739305 | 1,674910069 |
| <i>Sfn8</i>          | 0,216966907  | 1,11855472  | 1,564239651 | 1,538513511 | 1,825971892 |
| <i>Trim34a</i>       | 0,260998571  | 1,119027955 | 1,48440293  | 1,547858493 | 1,73730812  |
| <i>Rpl27</i>         | 0,296652946  | 1,030114906 | 1,475720052 | 1,514793833 | 1,824946888 |
| <i>Ythdf2</i>        | 0,408945652  | 1,236612578 | 1,561121176 | 1,524759567 | 1,7403443   |
| <i>Mat2b</i>         | 0,455341508  | 1,241590686 | 1,543575722 | 1,580282798 | 1,784372186 |
| <i>Ifi35</i>         | 0,351699741  | 1,204539408 | 1,463042633 | 1,580711433 | 1,73800277  |
| <i>Marveld1</i>      | 0,419893297  | 1,288583448 | 1,480522162 | 1,551400754 | 1,827874896 |
| <i>Tm9sf2</i>        | 0,379302716  | 1,284973896 | 1,456016009 | 1,545869119 | 1,818255383 |
| <i>Glipr1</i>        | 0,249354291  | 1,252428846 | 1,500537169 | 1,522639452 | 1,710554947 |
| <i>Actr2</i>         | 0,288398401  | 1,238328607 | 1,568453636 | 1,482478722 | 1,790728782 |
| <i>Btf3</i>          | 0,163981631  | 1,197364728 | 1,580157944 | 1,440193284 | 1,660105882 |
| <i>Cbfb</i>          | 0,267094362  | 1,109008687 | 1,440405796 | 1,384572484 | 1,696709653 |
| <i>Zgpat</i>         | 0,335344011  | 1,140312664 | 1,490388526 | 1,427675445 | 1,751240374 |

|                      |              |             |             |             |             |
|----------------------|--------------|-------------|-------------|-------------|-------------|
| <i>Pde7a</i>         | 0,300043682  | 1,340280627 | 1,645007504 | 1,412272238 | 2,149737444 |
| <i>Rpl5</i>          | 0,208350132  | 1,204454719 | 1,57891112  | 1,617678976 | 2,004383567 |
| <i>1700001K23Rik</i> | 0,208315911  | 1,052641185 | 1,213109075 | 1,694010569 | 1,956634794 |
| <i>Rcn1</i>          | 0,211991429  | 0,963529616 | 1,095783764 | 1,643969187 | 1,869864964 |
| <i>Dph5</i>          | 0,071670626  | 1,179831669 | 1,279142252 | 1,67083308  | 1,982779002 |
| <i>Rapgef6</i>       | -0,068977719 | 1,168917327 | 1,21316063  | 1,50218883  | 1,687657346 |
| <i>Sos1</i>          | 0,245101154  | 0,967477284 | 1,478454229 | 1,13670147  | 1,769064628 |
| <i>Nlrc3</i>         | 0,357284596  | 1,041243347 | 1,282796446 | 1,143890606 | 1,80688269  |
| <i>Zfp869</i>        | 0,259335412  | 0,962105387 | 1,47764598  | 1,346679699 | 1,977729587 |
| <i>Gm12657</i>       | 0,16541241   | 1,097604421 | 1,441951573 | 1,409321961 | 1,874885153 |
| <i>Crtam</i>         | 0,031344538  | 1,039233876 | 1,649929073 | 1,091751435 | 1,856584853 |
| <i>Rab8a</i>         | 0,353506415  | 0,79639134  | 1,501460123 | 1,594784432 | 2,080581197 |
| <i>Sike1</i>         | 0,313626347  | 0,62399317  | 1,293920967 | 1,606575652 | 2,212038588 |
| <i>Adam19</i>        | 0,035864605  | 0,818446652 | 1,727218139 | 1,533163156 | 2,203834196 |
| <i>Arpc4</i>         | 0,559612471  | 1,021411193 | 1,471802166 | 1,544923256 | 1,654715778 |
| <i>Mov10</i>         | 0,553144174  | 1,134073813 | 1,502472657 | 1,568124111 | 1,781546487 |
| <i>Ube2j2</i>        | 0,489137249  | 0,989425179 | 1,456916126 | 1,469916042 | 1,814773927 |
| <i>Oas1b</i>         | 0,445285545  | 1,075953656 | 1,637511394 | 1,58137442  | 1,683455194 |
| <i>Rpl35</i>         | 0,473202774  | 0,986981033 | 1,658322825 | 1,444909339 | 1,679857243 |
| <i>Ccnt2</i>         | 0,400515948  | 1,169152482 | 1,599616944 | 1,418525571 | 1,647204463 |
| <i>Wdr1</i>          | 0,437817443  | 1,186200256 | 1,535882106 | 1,358202034 | 1,71673684  |
| <i>Ejf4e</i>         | 0,43993249   | 1,241100017 | 1,538549316 | 1,416003824 | 1,608220829 |
| <i>Sfrs18</i>        | 0,43347101   | 1,199536308 | 1,534677889 | 1,430783888 | 1,567965791 |
| <i>Ube2n</i>         | 0,497638024  | 1,235273579 | 1,456035168 | 1,430258934 | 1,5902968   |
| <i>Rpl22</i>         | 0,518115849  | 1,130867035 | 1,435997096 | 1,433155094 | 1,745492115 |
| <i>Capza1</i>        | 0,455673401  | 1,203569898 | 1,453961189 | 1,453772883 | 1,721258818 |
| <i>Atp8b2</i>        | 0,641874643  | 1,197274157 | 1,561920004 | 1,493966746 | 1,902999313 |
| <i>1810008A18Rik</i> | 0,63216647   | 1,190481057 | 1,597946956 | 1,487166501 | 1,836824891 |
| <i>Il10rb</i>        | 0,691314263  | 1,171901885 | 1,570195526 | 1,441844015 | 1,856674114 |
| <i>2810407C02Rik</i> | 0,68512843   | 1,157944832 | 1,607564978 | 1,535042134 | 1,799237135 |
| <i>Tdg</i>           | 0,640070489  | 1,277857206 | 1,54874781  | 1,49657423  | 1,744625016 |
| <i>Gm9855</i>        | 0,64252409   | 1,298945552 | 1,550031865 | 1,512649212 | 1,753009677 |
| <i>Itfg3</i>         | 0,616404202  | 1,270871364 | 1,626116641 | 1,533405266 | 1,746350632 |
| <i>Ube2g2</i>        | 0,660379848  | 1,237687325 | 1,539384281 | 1,589217674 | 1,776469555 |
| <i>Atp5l</i>         | 0,500190935  | 1,256902804 | 1,705786597 | 1,519853282 | 1,876556938 |
| <i>Plcl2</i>         | 0,478226977  | 1,200277329 | 1,612650328 | 1,554983027 | 1,867101107 |
| <i>Cct5</i>          | 0,526871243  | 1,261770458 | 1,648659063 | 1,514853369 | 1,82064409  |
| <i>Dnajc5</i>        | 0,548927017  | 1,274004417 | 1,644181255 | 1,569852308 | 1,793761414 |
| <i>Cib1</i>          | 0,596342054  | 1,065682539 | 1,598499482 | 1,448852762 | 1,896923474 |
| <i>Zfp386</i>        | 0,562644644  | 1,110245453 | 1,494117125 | 1,388717303 | 1,926974749 |
| <i>Slmo2</i>         | 0,584561513  | 1,152904032 | 1,695804687 | 1,302850941 | 2,047051179 |
| <i>6720483E21Rik</i> | 0,591206109  | 0,933525848 | 1,6558977   | 1,46901605  | 1,83483332  |
| <i>AW011738</i>      | 0,543009241  | 1,056508173 | 1,691571347 | 1,519847503 | 1,97475301  |
| <i>Polr2e</i>        | 0,46018857   | 0,98130319  | 1,584788353 | 1,317841686 | 2,094206116 |
| <i>Nod1</i>          | 0,425404713  | 0,866223131 | 1,506204679 | 1,322844104 | 2,014386459 |
| <i>Klhdc3</i>        | 1,03486124   | 1,143288452 | 1,426615168 | 1,291403813 | 1,984324858 |
| <i>2510039O18Rik</i> | 1,019007547  | 1,067727374 | 1,467391087 | 1,27992118  | 1,849207564 |
| <i>Cbx8</i>          | 0,916636164  | 1,122241344 | 1,548756313 | 1,001706052 | 1,905596305 |
| <i>Slc12a7</i>       | 0,762992871  | 1,056934068 | 1,424493509 | 1,311286529 | 1,90625885  |
| <i>Gmppb</i>         | 0,706896463  | 1,127870396 | 1,460237447 | 1,180654166 | 1,907471541 |
| <i>Adam1a</i>        | 0,704968448  | 1,186041751 | 1,332586602 | 1,059239534 | 1,937357228 |

|                       |             |             |             |             |             |
|-----------------------|-------------|-------------|-------------|-------------|-------------|
| <i>Tacc1</i>          | 0,863180205 | 1,165556315 | 1,512620654 | 1,202093149 | 1,689415663 |
| <i>Ring1</i>          | 0,801417521 | 1,192085608 | 1,488048302 | 1,177842552 | 1,606634977 |
| <i>Ndufs8</i>         | 0,852073112 | 1,137363985 | 1,43883151  | 1,275232728 | 1,634771221 |
| <i>Zfp598</i>         | 0,736791937 | 1,151984373 | 1,434136793 | 1,198484345 | 1,700485555 |
| <i>Mpnd</i>           | 0,960852356 | 1,144167317 | 1,348740337 | 1,196951195 | 1,689841652 |
| <i>Oas3</i>           | 0,960789191 | 1,173469252 | 1,434918894 | 1,266082633 | 1,732245781 |
| <i>Nmb</i>            | 0,92667401  | 1,109421368 | 1,349295871 | 1,310941124 | 1,706792225 |
| <i>Lphn1</i>          | 0,86110695  | 1,080184284 | 1,439705943 | 1,130290923 | 1,590483686 |
| <i>Adrm1</i>          | 0,829389389 | 1,111605185 | 1,412825702 | 1,138463254 | 1,690127059 |
| <i>Pltp</i>           | 0,899714583 | 1,032240306 | 1,358309465 | 1,117105689 | 1,742643156 |
| <i>Fiz1</i>           | 0,960897444 | 1,03706509  | 1,411382804 | 1,138171707 | 1,746080701 |
| <i>Z510049J12Rik</i>  | 0,991884956 | 1,065160569 | 1,556597886 | 1,133832023 | 1,72566189  |
| <i>Tmem186</i>        | 0,701071896 | 0,870187617 | 1,40823358  | 1,195637603 | 1,814115746 |
| <i>Rpl38</i>          | 0,797042193 | 0,860075686 | 1,542680341 | 1,138946982 | 1,718020444 |
| <i>Zfp62</i>          | 0,75289827  | 1,279503783 | 1,540337238 | 1,239448699 | 1,592803875 |
| <i>Ppp5c</i>          | 0,812677407 | 1,291938916 | 1,617379961 | 1,334387154 | 1,568372438 |
| <i>N4bp2l1</i>        | 0,80313455  | 1,122801538 | 1,534285527 | 1,262802897 | 1,553256173 |
| <i>Slc25a3</i>        | 0,67846437  | 1,131867733 | 1,688389047 | 1,300466064 | 1,793731198 |
| <i>Sdccag3</i>        | 0,699325579 | 1,125545292 | 1,688126767 | 1,321035486 | 1,636274855 |
| <i>Slc25a30</i>       | 0,82089354  | 1,23308488  | 1,578863657 | 1,383231728 | 1,929579173 |
| <i>Pgm1</i>           | 0,834527816 | 1,347646764 | 1,605523238 | 1,385732521 | 1,847883655 |
| <i>Evl</i>            | 0,897666431 | 1,269062448 | 1,532720268 | 1,454579808 | 1,787790953 |
| <i>Mta2</i>           | 0,856703917 | 1,221263773 | 1,512867502 | 1,426409035 | 1,830270025 |
| <i>Z1810013D10Rik</i> | 0,818795237 | 1,31877158  | 1,626656782 | 1,426691732 | 1,716545215 |
| <i>Stau1</i>          | 0,761985454 | 1,330209413 | 1,620961856 | 1,452388911 | 1,743916917 |
| <i>Sart1</i>          | 0,775705152 | 1,232640985 | 1,599036272 | 1,400505965 | 1,781678137 |
| <i>Srsf1</i>          | 0,87644394  | 1,172495854 | 1,508253996 | 1,276416353 | 1,866036965 |
| <i>Hip1r</i>          | 0,867967251 | 1,268717527 | 1,589781957 | 1,275176239 | 1,8074673   |
| <i>Khsrp</i>          | 0,774938984 | 1,124151387 | 1,538326154 | 1,259054464 | 1,789477562 |
| <i>ZAl854703</i>      | 0,689764659 | 1,046180999 | 1,753049565 | 1,062261992 | 1,492545596 |
| <i>Tspan9</i>         | 0,505760231 | 0,871268059 | 1,684816558 | 1,139688946 | 1,713907414 |
| <i>Eng</i>            | 0,600224325 | 0,805259942 | 1,501757101 | 0,825740164 | 1,836308451 |
| <i>Fbll1</i>          | 0,607090787 | 0,929918178 | 1,631274979 | 0,763313926 | 1,768073612 |
| <i>Eif1</i>           | 0,582776044 | 1,000748581 | 1,522343137 | 0,980610565 | 2,005039181 |
| <i>Z1700016G22Rik</i> | 0,564751868 | 1,013795687 | 1,540990287 | 0,957707507 | 1,920537548 |
| <i>B3gnt3</i>         | 0,751787243 | 1,318422917 | 1,419037877 | 1,546236337 | 1,807643086 |
| <i>Nat15</i>          | 0,655008084 | 1,379027122 | 1,425844166 | 1,575877313 | 1,761550321 |
| <i>Kin</i>            | 0,647762214 | 1,322636516 | 1,397929397 | 1,436469386 | 1,788759941 |
| <i>Rps24</i>          | 0,597680865 | 1,184834765 | 1,347466971 | 1,494642264 | 1,815288203 |
| <i>Tbrg4</i>          | 0,710727321 | 1,176039972 | 1,44297045  | 1,465622903 | 1,784617664 |
| <i>Irak2</i>          | 0,920031545 | 1,287876521 | 1,284285571 | 1,539221747 | 1,756611515 |
| <i>Cyb561d2</i>       | 0,942733171 | 1,32510468  | 1,386604016 | 1,540745633 | 1,815077074 |
| <i>Ndufa6</i>         | 0,871065195 | 1,317002134 | 1,253366202 | 1,432165361 | 1,784570238 |
| <i>Gm16675</i>        | 0,855593925 | 1,408460031 | 1,323688866 | 1,573840455 | 1,679577374 |
| <i>Ikbkb</i>          | 0,762952429 | 1,044657992 | 1,305354815 | 1,493431616 | 1,745446407 |
| <i>Stip1</i>          | 0,791184931 | 1,138711356 | 1,331116916 | 1,545987748 | 1,628176378 |
| <i>Pole2</i>          | 0,69579716  | 1,041248977 | 1,157574666 | 1,553126477 | 1,631367053 |
| <i>Fndc5</i>          | 0,634384613 | 1,137143741 | 1,371849476 | 1,661396134 | 1,691184284 |
| <i>ZGm19589</i>       | 0,840890676 | 1,163557937 | 1,314741146 | 1,360565892 | 1,89768494  |
| <i>Ckap4</i>          | 0,874514369 | 1,112400174 | 1,324969702 | 1,437479557 | 1,80652003  |
| <i>Mfng</i>           | 0,793381343 | 1,192839729 | 1,302865944 | 1,51623727  | 1,848945578 |



|                      |             |             |             |             |             |
|----------------------|-------------|-------------|-------------|-------------|-------------|
| <i>Ilk</i>           | 0,85048145  | 1,234230425 | 1,246426471 | 1,539852046 | 2,008157934 |
| <i>Myd88</i>         | 0,788273138 | 1,065265653 | 1,077749205 | 1,470436766 | 1,884257043 |
| <i>Gltscr1</i>       | 0,725304269 | 1,097644214 | 1,313755    | 1,470149007 | 1,977207579 |
| <i>B3gat3</i>        | 0,766481077 | 1,070911733 | 1,495787057 | 1,48272554  | 1,984019507 |
| <i>Tceb2</i>         | 0,675242006 | 1,245451337 | 1,441879854 | 1,510258955 | 1,933371201 |
| <i>Polg2</i>         | 0,68696089  | 1,269860031 | 1,405139056 | 1,389248644 | 1,924030083 |
| <i>Slc30a1</i>       | 0,811252874 | 1,300474696 | 1,392691451 | 1,467907216 | 1,996924654 |
| <i>Klhdc1</i>        | 0,644019157 | 0,99350036  | 1,279584389 | 1,643775251 | 1,872540973 |
| <i>Rps6</i>          | 0,54457486  | 1,103628084 | 1,38700689  | 1,518776985 | 1,958060162 |
| <i>Rpl31</i>         | 0,482896253 | 0,994902871 | 1,135651008 | 1,589909863 | 1,967383374 |
| <i>Palm3</i>         | 0,640848569 | 1,055793966 | 1,320000204 | 1,478644083 | 2,173327066 |
| <i>Rhoc</i>          | 0,66694951  | 1,115461021 | 1,208315521 | 1,683905925 | 2,076246515 |
| <i>Dtx3l</i>         | 0,4391903   | 1,286229534 | 1,328561713 | 1,556412598 | 1,805221705 |
| <i>Tmem173</i>       | 0,346484479 | 1,277021753 | 1,24126167  | 1,528505114 | 1,855453374 |
| <i>Myo1g</i>         | 0,425557925 | 1,187448651 | 1,380701611 | 1,713609093 | 1,927128205 |
| <i>Rpl19</i>         | 0,339808054 | 0,983054523 | 1,310979306 | 2,021605075 | 1,808176634 |
| <i>Ppm1j</i>         | 0,531074542 | 1,199340395 | 1,158702412 | 1,971537547 | 1,786830157 |
| <i>Tmem141</i>       | 0,549980073 | 1,036297671 | 1,386955339 | 1,957596144 | 1,971928947 |
| <i>1110038D17Rik</i> | 0,636575533 | 1,088538836 | 1,510473733 | 2,006936533 | 2,056192322 |
| <i>Fam101b</i>       | 0,809169904 | 1,057576772 | 1,292096035 | 1,924543839 | 2,082539013 |
| <i>D630010B17Rik</i> | 0,573249716 | 0,994643724 | 1,300477836 | 1,784601831 | 1,526773338 |
| <i>Ppp1r27</i>       | 0,688902003 | 0,842200409 | 1,466422276 | 1,847633022 | 1,54714347  |
| <i>Tor1a</i>         | 0,840207492 | 1,282763185 | 1,744487038 | 1,531482577 | 1,582640732 |
| <i>Prss43</i>        | 0,783743194 | 1,187424473 | 1,78213392  | 1,57581077  | 1,663269069 |
| <i>Cdkn2aip</i>      | 0,56606786  | 1,365102732 | 1,641852582 | 1,550662544 | 1,423662695 |
| <i>Ppp1r3f</i>       | 0,751388579 | 1,485452319 | 1,719679207 | 1,488031139 | 1,588537718 |
| <i>Ndufa4</i>        | 0,796275713 | 1,39883445  | 1,737410312 | 1,511277828 | 1,544328704 |
| <i>Srsf4</i>         | 0,779885355 | 1,396725499 | 1,905469533 | 1,426509245 | 1,71209836  |
| <i>Polr2m</i>        | 0,685427479 | 1,485017034 | 1,67857312  | 1,352811557 | 1,703352448 |
| <i>Chmp2a</i>        | 0,750264707 | 1,442486743 | 1,666978003 | 1,379920141 | 1,647423743 |
| <i>Slc16a6</i>       | 0,767031153 | 1,36899788  | 1,741615787 | 1,330480331 | 1,713701484 |
| <i>Smap2</i>         | 0,717786165 | 1,34310587  | 1,716740282 | 1,317131866 | 1,726782136 |
| <i>Eif3g</i>         | 0,457450351 | 1,182177685 | 1,680945108 | 1,12334512  | 1,917207265 |
| <i>Cd226</i>         | 0,471103641 | 1,239122477 | 1,833053641 | 1,142933194 | 1,753289027 |
| <i>Il2rb</i>         | 0,624736409 | 1,407672602 | 1,74973044  | 1,085097543 | 1,889007103 |
| <i>Txn2</i>          | 0,678356661 | 1,380602584 | 1,575268142 | 1,375591599 | 1,86773244  |
| <i>Smcr8</i>         | 0,629270269 | 1,373346096 | 1,535508721 | 1,268033291 | 1,947983452 |
| <i>Csnk2b</i>        | 0,531138578 | 1,567906881 | 1,639551891 | 1,25231982  | 1,802510139 |
| <i>Atp5c1</i>        | 0,620982969 | 1,485579646 | 1,743817474 | 1,524451639 | 1,873989455 |
| <i>Dnaja1</i>        | 0,623533163 | 1,525035954 | 1,787044658 | 1,431679744 | 1,876990664 |
| <i>Tab2</i>          | 0,723834864 | 1,537141641 | 1,661200644 | 1,459690238 | 1,84116581  |
| <i>Luc7l3</i>        | 0,667169677 | 1,561921772 | 1,753324532 | 1,633124213 | 1,823928096 |
| <i>Psd4</i>          | 0,753589121 | 1,558911651 | 1,732060742 | 1,653362209 | 1,795572361 |
| <i>Mll1</i>          | 0,751888567 | 1,574608347 | 1,666284416 | 1,595524512 | 1,844361406 |
| <i>Rictor</i>        | 0,748077178 | 1,595837046 | 1,70541503  | 1,609986142 | 1,904079373 |
| <i>Foxn2</i>         | 0,752315972 | 1,487823657 | 1,698007699 | 1,653601703 | 1,913891664 |
| <i>Cox7a2l</i>       | 0,745287271 | 1,49810234  | 1,732158434 | 1,630253421 | 1,927471777 |
| <i>Myst3</i>         | 0,661233373 | 1,545313037 | 1,733833989 | 1,706009414 | 2,016489286 |
| <i>Atxn2l</i>        | 0,669026965 | 1,541686128 | 1,783507473 | 1,643420487 | 2,061081618 |
| <i>Dcaf7</i>         | 0,666104515 | 1,530207076 | 1,83461774  | 1,63730823  | 1,945142432 |
| <i>Pak2</i>          | 0,56202835  | 1,622031471 | 1,762552874 | 1,593087404 | 2,019801938 |

|                      |             |             |             |             |             |
|----------------------|-------------|-------------|-------------|-------------|-------------|
| <i>Cblb</i>          | 0,540886345 | 1,524598563 | 1,595399525 | 1,702676181 | 1,915132753 |
| <i>Cggbp1</i>        | 0,501277531 | 1,644192154 | 1,575007885 | 1,555801245 | 1,999746039 |
| <i>Icos</i>          | 0,606324241 | 1,647665305 | 1,583404779 | 1,517427535 | 1,801777797 |
| <i>Zfp865</i>        | 0,654675832 | 1,739956776 | 1,581485074 | 1,56929833  | 1,905299577 |
| <i>1700113A16Rik</i> | 0,761398765 | 1,502390018 | 1,433168882 | 1,587958182 | 1,920166323 |
| <i>Slc37a3</i>       | 0,71346648  | 1,588431793 | 1,457672444 | 1,568252769 | 1,829720391 |
| <i>1700101111Rik</i> | 0,809668729 | 1,608669646 | 1,530342574 | 1,587480744 | 2,001697593 |
| <i>Dnase2a</i>       | 0,742977597 | 1,556760328 | 1,449203751 | 1,361025176 | 1,965071554 |
| <i>Zfp628</i>        | 0,791283228 | 1,563444786 | 1,538541932 | 1,391374833 | 1,907164688 |
| <i>Sept11</i>        | 0,578736382 | 1,412940993 | 1,625119604 | 1,440274903 | 1,792726171 |
| <i>Tbk1</i>          | 0,558872239 | 1,392384099 | 1,653742995 | 1,447540164 | 1,692232237 |
| <i>Zbtb4</i>         | 0,632970487 | 1,431011909 | 1,614498043 | 1,488958619 | 1,732502803 |
| <i>Pum1</i>          | 0,643743265 | 1,414299859 | 1,624664915 | 1,473147454 | 1,708072009 |
| <i>Isca1</i>         | 0,58652103  | 1,499152007 | 1,649962603 | 1,467854519 | 1,70274042  |
| <i>Cpne1</i>         | 0,588707128 | 1,426762302 | 1,691269407 | 1,606426854 | 1,67050085  |
| <i>Tcf20</i>         | 0,574700536 | 1,41121897  | 1,640429756 | 1,55284559  | 1,656992687 |
| <i>Lemd3</i>         | 0,678230858 | 1,352828205 | 1,584848491 | 1,575777109 | 1,811155174 |
| <i>Prdm2</i>         | 0,681561376 | 1,386907466 | 1,635555356 | 1,565051536 | 1,78718361  |
| <i>Minos1</i>        | 0,709731851 | 1,33550141  | 1,572108491 | 1,51241599  | 1,746824174 |
| <i>Gbp4</i>          | 0,715503984 | 1,402578629 | 1,687393286 | 1,495714694 | 1,761332164 |
| <i>Hnrnpc</i>        | 0,58008856  | 1,510830142 | 1,727159183 | 1,538068109 | 1,697913484 |
| <i>Slc15a1</i>       | 0,589414787 | 1,510124791 | 1,76397455  | 1,516014636 | 1,649786021 |
| <i>Ms4a6d</i>        | 0,647430348 | 1,555053073 | 1,818710092 | 1,589155902 | 1,755919783 |
| <i>Arglu1</i>        | 0,450259455 | 1,524249545 | 1,737952356 | 1,59679892  | 1,748515019 |
| <i>Lsm14a</i>        | 0,459701698 | 1,544084249 | 1,711849305 | 1,549785796 | 1,736128375 |
| <i>Ndfip1</i>        | 0,497987465 | 1,593033543 | 1,652885075 | 1,611827492 | 1,76825121  |
| <i>Srp9</i>          | 0,44684546  | 1,379295379 | 1,813994344 | 1,455749921 | 1,802688485 |
| <i>Snrk</i>          | 0,417707087 | 1,435658684 | 1,876897586 | 1,480635136 | 1,900284576 |
| <i>Mdm2</i>          | 0,50885139  | 1,442459946 | 1,671206256 | 1,511886905 | 1,807565164 |
| <i>Cct2</i>          | 0,518049255 | 1,38485181  | 1,688265097 | 1,568719255 | 1,908267705 |
| <i>Fam134c</i>       | 0,366473798 | 1,517491207 | 1,699239546 | 1,569859576 | 1,838851187 |
| <i>N4bp2l2</i>       | 0,291821276 | 1,45673672  | 1,647389395 | 1,509413604 | 1,88094021  |
| <i>Sf3b1</i>         | 0,363300376 | 1,429795873 | 1,673791235 | 1,637458134 | 1,724483945 |
| <i>Abhd14b</i>       | 0,367281362 | 1,641491021 | 1,372065514 | 1,602449383 | 1,793050191 |
| <i>Tmem126a</i>      | 0,511357612 | 1,589331769 | 1,272063518 | 1,548214772 | 1,736085182 |
| <i>C78339</i>        | 0,4691355   | 1,449942657 | 1,456399448 | 1,441138419 | 1,827716468 |
| <i>Mettl9</i>        | 0,46457112  | 1,430476445 | 1,474679245 | 1,65143832  | 1,852954161 |
| <i>Tshz1</i>         | 0,490141273 | 1,470282695 | 1,482198252 | 1,814265603 | 1,783005806 |
| <i>Sdf4</i>          | 0,460321667 | 1,663299366 | 1,546942589 | 1,681161718 | 1,760528558 |
| <i>Hk3</i>           | 0,488567331 | 1,615833655 | 1,536482342 | 1,633671175 | 1,772151353 |
| <i>Zfp524</i>        | 1,050450227 | 1,856272211 | 1,548244022 | 1,391248427 | 2,67284221  |
| <i>Eid2</i>          | 0,773465336 | 1,678828052 | 1,259171357 | 1,037664037 | 2,833093097 |
| <i>Alkbh4</i>        | 0,673664473 | 0,975321674 | 1,612291731 | 1,934454209 | 3,073778357 |
| <i>Gm12504</i>       | 0,682161151 | 1,00511434  | 1,637117126 | 1,208049769 | 2,528891824 |
| <i>Scx</i>           | 0,823201799 | 1,253994091 | 1,656070264 | 1,078359053 | 2,534438497 |
| <i>Kremen2</i>       | 1,003928887 | 1,000909943 | 1,5382938   | 1,278351788 | 2,325258369 |
| <i>S100a10</i>       | 0,464734058 | 1,102015024 | 1,521442758 | 1,113880403 | 2,087876638 |
| <i>F2r</i>           | 0,483381182 | 1,340245299 | 1,534622675 | 1,173135492 | 2,093799216 |
| <i>Arhgdig</i>       | 0,534495964 | 1,225295109 | 1,647810148 | 0,966510836 | 2,37486696  |
| <i>Gpr68</i>         | 0,559279729 | 1,146522093 | 1,972702294 | 1,093178755 | 2,848773328 |
| <i>Snhg10</i>        | 0,833690995 | 0,792806505 | 1,976040154 | 0,919441703 | 2,275968414 |

|                      |             |             |             |             |             |
|----------------------|-------------|-------------|-------------|-------------|-------------|
| <i>Itgae</i>         | 0,629594086 | 0,870035342 | 1,895688302 | 0,938453591 | 2,069222941 |
| <i>Cxcl10</i>        | 0,592287799 | 1,090569517 | 1,987905927 | 0,780943731 | 2,325192261 |
| <i>Ccdc102a</i>      | 0,751498532 | 1,147395957 | 2,183837394 | 1,248311746 | 2,39258669  |
| <i>Lsp1</i>          | 0,894723079 | 1,14445099  | 2,100192266 | 1,337160008 | 2,243775231 |
| <i>5730508B09Rik</i> | 0,969309848 | 1,249737382 | 1,960779677 | 1,091866225 | 2,334770865 |
| <i>Haa0</i>          | 0,776325594 | 0,863223047 | 1,765314099 | 1,030946366 | 2,04167133  |
| <i>Bend4</i>         | 0,935718538 | 0,921364768 | 1,707944059 | 1,063057774 | 1,994534542 |
| <i>Rpl28</i>         | 1,05835572  | 0,704242637 | 1,857853037 | 1,180204083 | 2,268664661 |
| <i>Gpr114</i>        | 0,267776013 | 0,565318288 | 2,165934798 | 0,662607427 | 2,498109734 |
| <i>Cxcr6</i>         | 0,183212932 | 0,754126182 | 1,46896772  | 0,755595097 | 2,347095272 |
| <i>D930028M14Rik</i> | 0,615652464 | 1,649842299 | 2,31271627  | 2,213518164 | 2,657175405 |
| <i>B230219D22Rik</i> | 0,636943489 | 1,652081235 | 2,227683767 | 2,000402407 | 2,777089401 |
| <i>Arid5a</i>        | 0,766240413 | 1,683877496 | 2,218193434 | 2,244228105 | 2,865720266 |
| <i>BC037034</i>      | 0,89629439  | 1,596330868 | 2,314258529 | 2,190132715 | 2,782166927 |
| <i>Fam158a</i>       | 0,779226781 | 1,77300002  | 1,9346335   | 2,241614633 | 2,802616453 |
| <i>Glipr2</i>        | 0,819160255 | 1,433444691 | 2,301736275 | 2,033996657 | 2,498325545 |
| <i>Fam113b</i>       | 0,640258487 | 1,479707133 | 2,094685049 | 2,174355712 | 2,535627328 |
| <i>Fam65b</i>        | 0,888532799 | 1,552087158 | 2,018225371 | 2,153582198 | 2,558288013 |
| <i>Rpl32</i>         | 0,934306971 | 1,518321379 | 2,031782482 | 2,048535101 | 2,388534289 |
| <i>Srrm2</i>         | 0,91156877  | 1,827621293 | 2,052337197 | 1,989781668 | 2,42444106  |
| <i>Tmem59</i>        | 0,954588244 | 1,741990944 | 2,05060598  | 1,91742288  | 2,3524424   |
| <i>Spsb3</i>         | 0,960766767 | 1,760206129 | 1,921842167 | 1,965641157 | 2,409953246 |
| <i>Agap2</i>         | 1,061486854 | 1,779956597 | 2,065912384 | 2,067419312 | 2,547903183 |
| <i>Sp3</i>           | 0,788429349 | 1,701139725 | 2,088414801 | 2,068281188 | 2,306855122 |
| <i>Rpl17</i>         | 0,77654462  | 1,682423031 | 2,157579667 | 2,044611673 | 2,381740746 |
| <i>Trp53</i>         | 0,841385339 | 1,759567988 | 2,157605887 | 1,859881697 | 2,37528765  |
| <i>Rps19</i>         | 0,895945204 | 1,737577703 | 1,990834166 | 2,161571196 | 2,403739971 |
| <i>Add3</i>          | 0,822056169 | 1,693483053 | 1,913538262 | 2,161104009 | 2,316144714 |
| <i>Ldha</i>          | 0,845568127 | 1,814663572 | 1,904145588 | 2,26571089  | 2,255229589 |
| <i>Avpr2</i>         | 0,761234466 | 1,762850558 | 2,006734573 | 2,190095966 | 2,506635912 |
| <i>Ccnd2</i>         | 0,34986514  | 1,78258168  | 2,088259239 | 2,190723725 | 2,480095409 |
| <i>4921508A21Rik</i> | 0,108224474 | 1,652796641 | 2,146874198 | 2,317639182 | 2,575683767 |
| <i>Hus1b</i>         | 0,648583903 | 1,538252328 | 2,0427677   | 2,594887378 | 2,714839845 |
| <i>Rasa3</i>         | 0,706875199 | 1,707081745 | 2,193603296 | 2,492055368 | 2,866210214 |
| <i>Enpp7</i>         | 0,471707205 | 2,193885397 | 2,106450104 | 1,695257381 | 2,304106977 |
| <i>Egr3</i>          | 0,08131398  | 2,051463722 | 2,164824229 | 1,792784741 | 2,695525912 |
| <i>Npff</i>          | 0,27476667  | 1,788906606 | 2,42150958  | 1,401328234 | 2,347781483 |
| <i>Vat1</i>          | 0,814398613 | 1,388410008 | 1,428782646 | 1,733217867 | 2,171898163 |
| <i>Gcc1</i>          | 0,599476241 | 1,388992585 | 1,397149291 | 1,528667195 | 2,123765567 |
| <i>1700061G19Rik</i> | 0,717855722 | 1,230196923 | 1,573551273 | 1,753806077 | 2,215374902 |
| <i>Kcnab2</i>        | 0,672590909 | 1,189337933 | 1,523986767 | 1,831959526 | 2,04855031  |
| <i>Cdc42</i>         | 0,621281896 | 1,24939763  | 1,665642515 | 1,722493709 | 2,055569617 |
| <i>Irgm1</i>         | 0,66595623  | 1,363402424 | 1,657318078 | 1,731235885 | 2,074690706 |
| <i>Slc35b3</i>       | 0,505155549 | 1,412652957 | 1,547885897 | 1,729600205 | 2,081158335 |
| <i>Rpl4</i>          | 0,332197476 | 1,395559255 | 1,497841868 | 1,814400339 | 2,113467167 |
| <i>Slc30a7</i>       | 0,467137386 | 1,495987312 | 1,470198584 | 1,89053146  | 2,015733098 |
| <i>Rpl37</i>         | 0,340747567 | 1,292109252 | 1,578863402 | 1,959576543 | 2,038822675 |
| <i>Dapl1</i>         | 0,320966365 | 1,370499604 | 1,652239806 | 1,87058842  | 2,295834132 |
| <i>Ms4a4b</i>        | 0,433403271 | 1,460439538 | 1,769873919 | 1,860468446 | 2,18776772  |
| <i>1700017B05Rik</i> | 0,685360965 | 1,273863569 | 2,006588352 | 1,428590656 | 2,328791239 |
| <i>Oplah</i>         | 0,610160299 | 1,2838465   | 1,96815439  | 1,613106616 | 2,200392859 |

|                      |              |             |             |             |             |
|----------------------|--------------|-------------|-------------|-------------|-------------|
| <i>S100a4</i>        | 0,625275563  | 1,042407377 | 1,814669663 | 1,412825027 | 2,358676119 |
| <i>Gnb2l1</i>        | 0,602059575  | 1,456021092 | 1,690239673 | 1,491992287 | 2,020951028 |
| <i>Cant1</i>         | 0,643424443  | 1,406777478 | 1,698479964 | 1,456080223 | 2,02981781  |
| <i>Exosc3</i>        | 0,607411542  | 1,439802628 | 1,818070507 | 1,413929066 | 2,030906528 |
| <i>Trim12a</i>       | 0,654022554  | 1,338539699 | 1,778277013 | 1,703670504 | 1,967408156 |
| <i>Brd4</i>          | 0,625847431  | 1,409676189 | 1,802006485 | 1,626666988 | 1,997374462 |
| <i>G3bp1</i>         | 0,712598293  | 1,375776845 | 1,853654077 | 1,703058425 | 2,019950543 |
| <i>H2-K1</i>         | 0,636952369  | 1,240966969 | 1,711355374 | 1,602641178 | 2,205924046 |
| <i>Set</i>           | 0,687593201  | 1,296404641 | 1,606616623 | 1,504369719 | 2,173675955 |
| <i>Apol7e</i>        | 0,693791595  | 1,393835142 | 1,733081159 | 1,669964642 | 2,262113324 |
| <i>A930005H10Rik</i> | 0,012125995  | 1,264535545 | 1,632492407 | 1,881645019 | 2,373315858 |
| <i>Card6</i>         | -0,018831207 | 1,253059459 | 1,612195652 | 1,844259722 | 2,175207572 |
| <i>H2-D1</i>         | 0,135888918  | 1,273334411 | 1,949822806 | 2,067794938 | 2,41544212  |
| <i>Sgk1</i>          | 0,465975954  | 1,139822328 | 1,499594359 | 1,957891015 | 2,49936751  |
| <i>F2rl1</i>         | 0,140288731  | 1,282283101 | 1,467516873 | 1,914159545 | 2,525589933 |
| <i>H2-Q7</i>         | 0,281830465  | 1,256888803 | 1,654912094 | 1,651256833 | 2,750473517 |
| <i>H2-Q9</i>         | 0,264686174  | 1,264821961 | 1,654924344 | 1,662171636 | 2,748344235 |
| <i>Sepw1</i>         | 0,676152405  | 1,569810143 | 2,170745866 | 1,710029098 | 2,264503551 |
| <i>Ankrd10</i>       | 0,661520239  | 1,563702729 | 2,059003737 | 1,624717814 | 2,128406074 |
| <i>Rarg</i>          | 0,814443675  | 1,434248301 | 2,104376339 | 1,591403105 | 2,276670944 |
| <i>Lime1</i>         | 0,686260952  | 1,427391353 | 2,326079884 | 1,797692736 | 2,172031311 |
| <i>Mfsd5</i>         | 0,597260492  | 1,419677491 | 2,20109879  | 1,696644683 | 2,532584271 |
| <i>Ostf1</i>         | 0,581059975  | 1,374374874 | 2,001527569 | 1,743313438 | 2,495869745 |
| <i>U2af2</i>         | 0,503804038  | 1,516713436 | 1,921530477 | 1,746417606 | 2,109815444 |
| <i>Serbp1</i>        | 0,35721369   | 1,470282448 | 1,898063712 | 1,799599128 | 2,055457612 |
| <i>Cnbp</i>          | 0,419330146  | 1,533793169 | 2,083375279 | 1,758285199 | 2,128662772 |
| <i>Cx3cr1</i>        | 0,299613385  | 1,62537686  | 2,075747446 | 1,631297677 | 1,99642327  |
| <i>Srsf10</i>        | 0,347290092  | 1,397767989 | 1,782661377 | 1,590384119 | 2,072984605 |
| <i>Agfg1</i>         | 0,273444863  | 1,36497363  | 1,854597867 | 1,718057698 | 2,122019471 |
| <i>Rps15a</i>        | 0,399050048  | 1,363231746 | 1,953782823 | 1,440897431 | 2,134703972 |
| <i>Paqr7</i>         | 0,752835823  | 1,487206057 | 1,963569135 | 1,879008981 | 2,257070667 |
| <i>D8Ertd82e</i>     | 0,618575606  | 1,581896725 | 1,884143737 | 1,894437069 | 2,384638159 |
| <i>Rpl21</i>         | 0,841789855  | 1,507241475 | 1,92270776  | 1,964311914 | 2,427745222 |
| <i>Rnf31</i>         | 0,782424964  | 1,608308303 | 1,979187706 | 1,95836513  | 2,444401452 |
| <i>Nol7</i>          | 0,757703901  | 1,562134503 | 1,668116939 | 1,854398212 | 2,422967248 |
| <i>Prf1</i>          | 0,684065363  | 1,545011159 | 1,672066738 | 1,923859778 | 2,336832784 |
| <i>Capzb</i>         | 0,789890298  | 1,458643317 | 1,796305194 | 1,794554286 | 2,192403475 |
| <i>Fbl</i>           | 0,799938435  | 1,387812058 | 1,758811998 | 1,921229991 | 2,13987809  |
| <i>Slc17a9</i>       | 0,755078824  | 1,335511609 | 1,887336284 | 1,901387284 | 2,236232531 |
| <i>Eif5a</i>         | 0,674301087  | 1,297454494 | 1,913917139 | 1,779486979 | 2,218920515 |
| <i>Tgtp2</i>         | 0,398874865  | 1,411181338 | 1,746960314 | 1,962218715 | 2,498803114 |
| <i>Tgtp1</i>         | 0,398874326  | 1,410435942 | 1,753711206 | 1,973766483 | 2,498804683 |
| <i>Cisd3</i>         | 0,502275768  | 1,497253588 | 1,897885952 | 1,904311148 | 2,595064482 |
| <i>Irf2</i>          | 0,733608957  | 1,646595362 | 1,955991754 | 2,043770013 | 2,240511195 |
| <i>Smurf1</i>        | 0,550840039  | 1,731953023 | 1,922239438 | 2,084488789 | 2,194726976 |
| <i>Rps3</i>          | 0,55685457   | 1,707087644 | 1,835277346 | 2,002064571 | 2,410535584 |
| <i>4930420K17Rik</i> | 0,479376165  | 1,784379027 | 1,867597141 | 2,070057304 | 2,368728706 |
| <i>Rnf149</i>        | 0,522975469  | 1,865814692 | 1,922447919 | 1,822782355 | 2,12597267  |
| <i>Actr3</i>         | 0,424267687  | 1,819081746 | 1,957765383 | 1,859226083 | 2,108088766 |
| <i>Anxa6</i>         | 0,580077935  | 1,724519881 | 1,85582197  | 1,872993743 | 2,090313365 |
| <i>Mapk1ip1l</i>     | 0,582164773  | 1,788850765 | 1,856958148 | 1,962126432 | 2,098136631 |

|                      |             |             |             |             |             |
|----------------------|-------------|-------------|-------------|-------------|-------------|
| <i>Son</i>           | 0,631326651 | 1,810920044 | 1,910225052 | 1,90051523  | 2,285551388 |
| <i>Tomm20</i>        | 0,610181128 | 1,779256024 | 2,046637167 | 1,756487578 | 2,227943955 |
| <i>Cox10</i>         | 0,511733036 | 2,010249814 | 1,795474747 | 2,241657794 | 2,193113296 |
| <i>Gm11517</i>       | 0,415171792 | 1,898932003 | 1,734341841 | 2,257168933 | 1,879615926 |
| <i>Tes</i>           | 0,162167034 | 1,895968559 | 1,744634681 | 1,940425635 | 1,851318372 |
| <i>Il7r</i>          | 0,133934755 | 1,841960578 | 1,436475171 | 2,092248379 | 1,859778588 |
| <i>I830012O16Rik</i> | 0,372727482 | 1,927602725 | 1,277082817 | 1,723078463 | 2,209038056 |
| <i>Ddx19a</i>        | 0,568693944 | 2,387397947 | 1,679862985 | 2,061145213 | 1,570780454 |
| <i>Xylt2</i>         | 0,632048878 | 2,248565282 | 1,781525012 | 2,184845457 | 1,783189723 |
| <i>Gm13546</i>       | 0,461510629 | 2,140744524 | 1,445428391 | 2,094057064 | 1,514779109 |
| <i>Adat1</i>         | 0,716420961 | 2,170390948 | 1,832252563 | 1,829785499 | 1,595211597 |
| <i>Adipoq</i>        | 0,757552512 | 2,180318017 | 1,74756877  | 1,764715805 | 1,589568964 |
| <i>Zfp146</i>        | 0,236830661 | 1,772508235 | 2,039651018 | 1,957571281 | 2,268204636 |
| <i>Ifi2711</i>       | 0,081820254 | 1,774321405 | 1,934021914 | 1,927380278 | 2,072143173 |
| <i>Eif4a1</i>        | 0,392600757 | 1,64509151  | 1,905399442 | 1,904735877 | 2,201117269 |
| <i>Chd7</i>          | 0,39887201  | 1,648419703 | 1,864822036 | 2,048761566 | 2,147217102 |
| <i>Sesn3</i>         | 0,301274733 | 1,71610242  | 1,867744247 | 1,905938166 | 2,086818623 |
| <i>1810013L24Rik</i> | 0,610389867 | 1,726527514 | 1,957062181 | 1,919381099 | 1,989959705 |
| <i>Rbm12</i>         | 0,623119307 | 1,726302364 | 2,018955334 | 1,954757158 | 1,981475457 |
| <i>Ppp1cb</i>        | 0,442295123 | 1,860561409 | 1,986541249 | 1,932978376 | 1,968333612 |
| <i>Rgs19</i>         | 0,606843947 | 1,844817006 | 2,165307119 | 1,913420686 | 2,073315897 |
| <i>Ppp4r2</i>        | 0,553246488 | 1,875629729 | 1,995840716 | 1,670577883 | 1,940996251 |
| <i>Rap1a</i>         | 0,582527003 | 1,896043504 | 1,930829053 | 1,82300554  | 1,969245647 |
| <i>Ptgfrn</i>        | 0,606394649 | 1,778884163 | 1,791630676 | 1,949668122 | 1,838881499 |
| <i>Dennd2d</i>       | 0,650202558 | 1,759352935 | 1,744707619 | 1,821947529 | 1,860684148 |
| <i>Stat6</i>         | 0,540919685 | 1,734551077 | 1,805305535 | 1,874246291 | 1,936906916 |
| <i>Pacsin1</i>       | 0,592226245 | 1,743669574 | 1,728232941 | 1,853954269 | 1,983041719 |
| <i>Rabif</i>         | 0,519733079 | 1,629891523 | 1,605945363 | 1,757001925 | 1,86052947  |
| <i>Fam75d3</i>       | 0,532622421 | 1,607391572 | 1,633642222 | 1,817410016 | 1,846151877 |
| <i>Dusp11</i>        | 0,496181303 | 1,622414682 | 1,642388363 | 1,899433668 | 1,81927113  |
| <i>Gpr83</i>         | 0,483213414 | 1,673538267 | 1,638647271 | 1,972206656 | 1,632371987 |
| <i>Spag7</i>         | 0,536868285 | 1,721232776 | 1,821958294 | 2,058255948 | 1,716774848 |
| <i>Rps13</i>         | 0,231366405 | 1,544207647 | 1,743354669 | 1,80352435  | 1,847900575 |
| <i>Ms4a6b</i>        | 0,395558356 | 1,526139452 | 1,922164424 | 1,94616413  | 1,854966665 |
| <i>Hnrnpa2b1</i>     | 0,474806793 | 1,367809383 | 1,809739963 | 1,815404066 | 1,844299818 |
| <i>Rpl6</i>          | 0,415355737 | 1,350391017 | 1,647388168 | 1,869754186 | 1,854574134 |
| <i>Fam26f</i>        | 0,564927067 | 1,411909841 | 2,157520265 | 2,114791955 | 2,227824636 |
| <i>Rg9mtd1</i>       | 0,49330011  | 1,613873175 | 2,108270374 | 2,031244563 | 2,330752698 |
| <i>Trem12</i>        | 0,436309826 | 1,678010612 | 2,126828386 | 2,294011991 | 2,159524826 |
| <i>B130006D01Rik</i> | 0,767029144 | 1,644621798 | 2,226049778 | 2,200516778 | 1,95372265  |
| <i>Fryl</i>          | 1,13821008  | 1,629041988 | 1,769140209 | 1,674538321 | 2,016516364 |
| <i>Mgat4b</i>        | 1,118776394 | 1,661962285 | 1,723081881 | 1,680417421 | 1,949882585 |
| <i>Tecr</i>          | 1,102867317 | 1,547292586 | 1,742707585 | 1,666733391 | 2,017690197 |
| <i>Usp18</i>         | 1,120569494 | 1,530475693 | 1,695196017 | 1,64549486  | 1,969607133 |
| <i>Msl1</i>          | 1,061169667 | 1,528789899 | 1,829016191 | 1,796540292 | 1,975138703 |
| <i>Uso1</i>          | 1,026449456 | 1,599372639 | 1,778751173 | 1,766709307 | 1,911715079 |
| <i>Akap13</i>        | 1,087720561 | 1,590637326 | 1,744098382 | 1,759266574 | 2,008478187 |
| <i>Atp1a1</i>        | 1,089610545 | 1,574633627 | 1,766770685 | 1,814915795 | 1,985199338 |
| <i>Erp29</i>         | 0,992565191 | 1,439446622 | 1,697305002 | 1,690522295 | 1,970651984 |
| <i>Mll2</i>          | 1,021010247 | 1,478865122 | 1,754424348 | 1,658319225 | 2,063603428 |
| <i>Ncdn</i>          | 1,083949942 | 1,431012882 | 1,613204303 | 1,663628263 | 1,989050006 |

|                      |             |             |             |             |             |
|----------------------|-------------|-------------|-------------|-------------|-------------|
| <i>Rsb1</i>          | 1,073164278 | 1,464061861 | 1,674762111 | 1,644426229 | 1,911821036 |
| <i>Rer1</i>          | 0,998391928 | 1,466031947 | 1,549811731 | 1,695082396 | 2,041933028 |
| <i>Pitpnc1</i>       | 0,884412971 | 1,507729491 | 1,622816878 | 1,755433969 | 1,960792528 |
| <i>ORF61</i>         | 0,971107449 | 1,53911946  | 1,668194086 | 1,782513199 | 2,062628679 |
| <i>Zfp871</i>        | 1,006274668 | 1,508721504 | 1,620708756 | 1,720888732 | 2,08935308  |
| <i>Pdcd4</i>         | 0,931381167 | 1,457537156 | 1,675874478 | 1,812726071 | 2,103971166 |
| <i>Smc4</i>          | 1,185572706 | 1,568910489 | 1,801405441 | 1,638254616 | 2,054344839 |
| <i>Kctd20</i>        | 1,132687021 | 1,468572269 | 1,84629907  | 1,655355676 | 2,039525128 |
| <i>1700023F06Rik</i> | 1,153899982 | 1,550325008 | 1,878638472 | 1,709808789 | 2,108863459 |
| <i>Cdc42se2</i>      | 1,121629762 | 1,59296042  | 1,858594445 | 1,689491081 | 2,080170847 |
| <i>Ccdc71</i>        | 1,091580224 | 1,567952042 | 1,834160866 | 1,579940393 | 2,110028854 |
| <i>Lrrc8c</i>        | 1,088518718 | 1,456767745 | 1,802589484 | 1,754689317 | 2,110254481 |
| <i>Fuz</i>           | 1,11343905  | 1,410759716 | 1,769058253 | 1,741104923 | 2,058652036 |
| <i>Pex10</i>         | 1,142883067 | 1,55107869  | 1,72796055  | 1,698355507 | 2,125927111 |
| <i>Btbd2</i>         | 1,154531611 | 1,665879715 | 1,729516646 | 1,74144978  | 2,116557966 |
| <i>Ric8</i>          | 1,235559135 | 1,567249137 | 1,657920062 | 1,58043391  | 2,078205346 |
| <i>Fnbp1</i>         | 1,066860429 | 1,540029626 | 1,786187428 | 1,603140288 | 1,981201012 |
| <i>Limd1</i>         | 1,032429817 | 1,495115316 | 1,817895653 | 1,553071211 | 2,053223087 |
| <i>Fosl1</i>         | 0,994221857 | 1,544132541 | 1,868906694 | 1,517704564 | 1,96759943  |
| <i>2410004B18Rik</i> | 0,906838934 | 1,557924087 | 1,806951846 | 1,621484273 | 2,062032938 |
| <i>Hdac1</i>         | 0,936412846 | 1,52581596  | 1,811323922 | 1,564663632 | 2,042688171 |
| <i>Atp6v0c</i>       | 1,014890576 | 1,640695089 | 1,839093451 | 1,556392635 | 2,050580984 |
| <i>Atp6v0c-ps2</i>   | 1,014900018 | 1,653204705 | 1,846057607 | 1,556410194 | 2,043063449 |
| <i>Pten</i>          | 1,064156078 | 1,631797048 | 1,863404809 | 1,667685907 | 2,008073788 |
| <i>3110003A17Rik</i> | 0,970640438 | 1,703557007 | 1,932659866 | 1,642453262 | 2,039314105 |
| <i>1600014C10Rik</i> | 0,966382202 | 1,686404436 | 1,675541643 | 1,707100435 | 2,097998383 |
| <i>1700001P01Rik</i> | 0,810147478 | 1,659605849 | 1,735633494 | 1,627622493 | 2,115935359 |
| <i>2810013P06Rik</i> | 1,029983048 | 1,457847345 | 1,783233507 | 1,920876696 | 1,853736907 |
| <i>Cd74</i>          | 1,039420669 | 1,569662066 | 1,81093586  | 1,921059312 | 1,752495514 |
| <i>Mettl21d</i>      | 0,868870338 | 1,457938638 | 1,735126104 | 1,836249805 | 1,777816454 |
| <i>Rap2b</i>         | 0,923010906 | 1,523787897 | 1,652123459 | 1,875927043 | 1,74828456  |
| <i>Capg</i>          | 0,911278597 | 1,485030305 | 1,765404074 | 1,655553242 | 1,933411138 |
| <i>D11Wsu99e</i>     | 0,917091171 | 1,488769753 | 1,745245735 | 1,666220572 | 1,862163819 |
| <i>Mrps23</i>        | 0,895510571 | 1,383001772 | 1,818702798 | 1,771692479 | 1,910102189 |
| <i>Ndufb7</i>        | 0,940173547 | 1,529377028 | 1,816959678 | 1,782912398 | 2,04140069  |
| <i>Ewsr1</i>         | 0,94192462  | 1,592083879 | 1,897589245 | 1,774394563 | 1,902496147 |
| <i>Aebp2</i>         | 1,058535672 | 1,472649215 | 1,683617207 | 1,829213661 | 1,83143192  |
| <i>Letmd1</i>        | 1,045004476 | 1,422318512 | 1,562134162 | 1,82647516  | 1,848539451 |
| <i>Acvr1b</i>        | 1,069580758 | 1,577012419 | 1,64415858  | 1,795210248 | 1,905394077 |
| <i>Gps2</i>          | 1,0748606   | 1,527324693 | 1,587076827 | 1,812406758 | 1,972117422 |
| <i>Atg4d</i>         | 1,061675411 | 1,544810106 | 1,678295896 | 1,760996044 | 1,993469293 |
| <i>Tpt1</i>          | 1,161395366 | 1,57937022  | 1,656287255 | 1,667529742 | 1,838431538 |
| <i>Cecr5</i>         | 1,147312885 | 1,537174723 | 1,641771179 | 1,60377831  | 1,803678159 |
| <i>Pdlim1</i>        | 1,010824458 | 1,507607223 | 1,534055362 | 1,629884535 | 1,834594298 |
| <i>Tbc1d22b</i>      | 1,06686439  | 1,496151426 | 1,590314678 | 1,637381745 | 1,843068452 |
| <i>Lrrfip1</i>       | 1,114749076 | 1,659760024 | 1,726314608 | 1,639421294 | 1,826266977 |
| <i>Tmem194b</i>      | 1,146764254 | 1,72031019  | 1,725363758 | 1,62545144  | 1,782463934 |
| <i>Zfp362</i>        | 1,069006694 | 1,628271357 | 1,6656002   | 1,556790613 | 1,803823042 |
| <i>4921525O09Rik</i> | 0,993696628 | 1,773252218 | 1,743389373 | 1,574481709 | 1,885296043 |
| <i>Lipe</i>          | 1,004566356 | 1,761492086 | 1,769283114 | 1,607909772 | 1,871088891 |
| <i>Idh3b</i>         | 1,128416622 | 1,68285853  | 1,600065312 | 1,713257959 | 1,922851285 |

|                      |             |             |             |             |             |
|----------------------|-------------|-------------|-------------|-------------|-------------|
| <i>Cog1</i>          | 1,117804326 | 1,669741055 | 1,653711534 | 1,560536661 | 1,94413902  |
| <i>Gm16880</i>       | 1,127898299 | 1,715057257 | 1,769997125 | 1,498409611 | 1,854132726 |
| <i>LOC100503496</i>  | 1,18810621  | 1,699166368 | 1,866732606 | 1,524312753 | 1,889346038 |
| <i>Btd</i>           | 1,286305233 | 1,760478751 | 1,756646499 | 1,502040868 | 1,877789907 |
| <i>Hp1bp3</i>        | 1,298014367 | 1,635285518 | 1,726399616 | 1,582942722 | 1,754245912 |
| <i>H13</i>           | 1,230814524 | 1,650523682 | 1,723669401 | 1,545521144 | 1,789032405 |
| <i>4930455C13Rik</i> | 1,249408889 | 1,610209413 | 1,820230342 | 1,535230693 | 1,702551208 |
| <i>5430405H02Rik</i> | 0,950834333 | 1,730398049 | 1,795072621 | 1,628843247 | 1,751725735 |
| <i>Rhot2</i>         | 0,876047923 | 1,730346578 | 1,829952739 | 1,626789684 | 1,760681719 |
| <i>Baz2a</i>         | 0,921327065 | 1,732404476 | 1,806533384 | 1,591996833 | 1,629201664 |
| <i>Crbn</i>          | 0,972181516 | 1,755576373 | 1,699840114 | 1,652474601 | 1,685472731 |
| <i>Rin3</i>          | 1,059833401 | 1,803226104 | 1,706710585 | 1,604671416 | 1,740371635 |
| <i>Chd1</i>          | 0,965713945 | 1,813090543 | 1,61352605  | 1,572500833 | 1,693749361 |
| <i>Drap1</i>         | 0,917522432 | 1,47856447  | 2,068954634 | 1,896246216 | 1,732635377 |
| <i>4930539J05Rik</i> | 0,981912257 | 1,339854604 | 1,989500949 | 1,803126919 | 1,574611689 |
| <i>Malat1</i>        | 1,146380664 | 1,591890145 | 2,131959258 | 1,718673594 | 1,671588894 |
| <i>Sgms1</i>         | 1,226939873 | 1,784717136 | 1,575419697 | 1,931642324 | 1,696589904 |
| <i>Zmynd8</i>        | 1,263036415 | 1,830170204 | 1,701254642 | 1,991930614 | 1,771989201 |
| <i>Dyx1c1</i>        | 1,194202264 | 1,795783109 | 1,612388054 | 1,815609566 | 1,941599503 |
| <i>Acy1</i>          | 1,180565162 | 1,847401293 | 1,630956896 | 1,893906798 | 1,870568729 |
| <i>Tnrc6b</i>        | 1,218275936 | 1,630592219 | 1,762854386 | 1,684246301 | 1,822925392 |
| <i>Rab11b</i>        | 1,180700523 | 1,685918794 | 1,755451247 | 1,758101082 | 1,843291542 |
| <i>Slc36a3</i>       | 1,278961378 | 1,7326746   | 1,725578888 | 1,750225931 | 1,86814954  |
| <i>Derl3</i>         | 1,192163213 | 1,779819964 | 1,648896254 | 1,686879187 | 1,80532101  |
| <i>Gm2a</i>          | 1,157555563 | 1,602615532 | 1,616518097 | 1,782031113 | 1,775256644 |
| <i>Nfatc2</i>        | 1,207331524 | 1,584007999 | 1,590957523 | 1,766740918 | 1,835557682 |
| <i>Bak1</i>          | 1,236223743 | 1,66155783  | 1,534421274 | 1,819618983 | 1,821221331 |
| <i>Stk16</i>         | 0,860112277 | 1,62527255  | 1,694148239 | 2,047384563 | 1,758415933 |
| <i>Tor1aip2</i>      | 0,821343712 | 1,81480581  | 1,765674817 | 1,943887883 | 1,717541722 |
| <i>Nckap5l</i>       | 1,077158431 | 1,793637343 | 1,617964725 | 1,918545832 | 1,77872734  |
| <i>Ncoa3</i>         | 1,038669144 | 1,72324989  | 1,681275094 | 1,919394229 | 1,828223694 |
| <i>3300005D01Rik</i> | 0,916215627 | 1,772370671 | 1,669824422 | 1,909981459 | 1,826564799 |
| <i>Cldn10</i>        | 1,054074002 | 1,706811692 | 1,740053454 | 1,767107238 | 1,795968853 |
| <i>Ncoa2</i>         | 1,055747341 | 1,762091519 | 1,804613488 | 1,862183018 | 1,890574813 |
| <i>Wdr73</i>         | 1,110591832 | 1,679165243 | 1,898966745 | 1,922087361 | 1,767613337 |
| <i>Gm885</i>         | 1,181747874 | 1,675823471 | 1,725309744 | 1,94861472  | 1,86660695  |
| <i>Tnfaip8</i>       | 1,14101109  | 1,80910494  | 1,891665465 | 1,799493293 | 1,951870567 |
| <i>Tbc1d16</i>       | 1,107697084 | 1,786229167 | 1,871455525 | 1,7719399   | 1,898561405 |
| <i>Ptger4</i>        | 1,204528217 | 1,843855043 | 1,883499258 | 1,834506454 | 1,870030245 |
| <i>Ftl1</i>          | 1,224308698 | 1,617956636 | 2,077497121 | 1,999781101 | 1,931904845 |
| <i>Plcg1</i>         | 1,07545719  | 1,729691046 | 1,835169772 | 1,827164061 | 2,045985265 |
| <i>Ln timer</i>      | 1,121223523 | 1,762616633 | 1,776494619 | 1,762627553 | 2,042052077 |
| <i>Cds2</i>          | 1,210189824 | 1,730008389 | 1,741450465 | 1,766697703 | 2,003821353 |
| <i>Aim1l</i>         | 1,254630022 | 1,704224577 | 1,883152394 | 1,888686762 | 2,04613294  |
| <i>Crlf3</i>         | 1,222765581 | 1,712735476 | 1,810152641 | 1,871595642 | 2,03403004  |
| <i>Map3k14</i>       | 1,198170897 | 1,740781933 | 1,795973094 | 1,879654818 | 2,119311081 |
| <i>Cep97</i>         | 1,181150807 | 1,60806716  | 1,764178647 | 1,895247429 | 2,019483852 |
| <i>D430020J02Rik</i> | 1,339128197 | 1,796220709 | 1,870031516 | 1,953745794 | 2,006448459 |
| <i>Cabp4</i>         | 1,234476237 | 1,742021064 | 1,797661098 | 1,995978062 | 2,008631855 |
| <i>4930523C07Rik</i> | 1,161112386 | 1,881900096 | 1,903056074 | 1,96748021  | 1,949970357 |
| <i>Lbp</i>           | 0,665414529 | 1,472002376 | 1,659415473 | 1,867192565 | 1,590149553 |

|                      |             |             |             |             |             |
|----------------------|-------------|-------------|-------------|-------------|-------------|
| <i>1500032L24Rik</i> | 0,536800211 | 1,553156801 | 1,686627306 | 1,800736619 | 1,56202208  |
| <i>Fibcd1</i>        | 0,712302175 | 1,593399834 | 1,522887589 | 1,807543288 | 1,553364076 |
| <i>Suds3</i>         | 0,787344064 | 1,625159523 | 1,596756646 | 1,644507345 | 1,70913509  |
| <i>Ptk2b</i>         | 0,794981411 | 1,660335251 | 1,595660748 | 1,624390849 | 1,609022432 |
| <i>Sep15</i>         | 0,639852547 | 1,714280849 | 1,644411137 | 1,66808573  | 1,670210864 |
| <i>Mink1</i>         | 0,583401524 | 1,727419486 | 1,608231096 | 1,870318143 | 1,656873958 |
| <i>Sae1</i>          | 0,521359522 | 1,715678613 | 1,542573211 | 1,780368669 | 1,739151059 |
| <i>Ccng1</i>         | 0,644085744 | 1,579299585 | 1,472963273 | 1,924828907 | 1,664415397 |
| <i>Fam186b</i>       | 0,640497795 | 1,625984931 | 1,508518399 | 1,932704606 | 1,778821603 |
| <i>Llph</i>          | 0,880382549 | 1,53555469  | 1,433272997 | 1,868229037 | 1,763859033 |
| <i>Mrpl12</i>        | 0,888501145 | 1,577930059 | 1,359046997 | 1,823682185 | 1,737292623 |
| <i>Chd3</i>          | 0,793018045 | 1,674902252 | 1,338510782 | 1,954007049 | 1,663786039 |
| <i>Cbln3</i>         | 0,839395044 | 1,353743626 | 1,437360981 | 1,848932583 | 1,656888168 |
| <i>Kifc1</i>         | 0,785914998 | 1,423952246 | 1,458854107 | 1,879447227 | 1,65793539  |
| <i>Tmem234</i>       | 0,761990997 | 1,360833087 | 1,409030773 | 1,925100108 | 1,740486107 |
| <i>Elf2</i>          | 0,877944062 | 1,556407264 | 1,69526153  | 1,602996171 | 1,715542173 |
| <i>Slain1</i>        | 0,919725025 | 1,535179599 | 1,653614092 | 1,595366897 | 1,679703951 |
| <i>Rab14</i>         | 0,803816605 | 1,474645476 | 1,703356117 | 1,617483302 | 1,675851541 |
| <i>Snx3</i>          | 0,806991314 | 1,587360985 | 1,751715996 | 1,663940592 | 1,698087743 |
| <i>Tor1aip1</i>      | 0,746876827 | 1,603523002 | 1,715242682 | 1,673777287 | 1,673474652 |
| <i>Olfml3</i>        | 0,875763615 | 1,494866635 | 1,652500379 | 1,699705997 | 1,767107862 |
| <i>Purb</i>          | 0,811527182 | 1,535704996 | 1,711981289 | 1,761895278 | 1,780130177 |
| <i>St6galnac2</i>    | 0,753664351 | 1,568133404 | 1,596189647 | 1,755988431 | 1,8021444   |
| <i>Kansl2</i>        | 0,915237786 | 1,646323586 | 1,601403468 | 1,730513533 | 1,755739926 |
| <i>Hiat1</i>         | 0,920385875 | 1,625867216 | 1,696745687 | 1,727828405 | 1,779703845 |
| <i>Mapkapk2</i>      | 0,891475189 | 1,695906019 | 1,706796007 | 1,621367485 | 1,849892427 |
| <i>Rcor1</i>         | 0,937435162 | 1,645591399 | 1,684055641 | 1,620736438 | 1,829392898 |
| <i>Chd2</i>          | 0,908139019 | 1,62847906  | 1,700403279 | 1,662120334 | 1,892777044 |
| <i>Traf3</i>         | 0,910232606 | 1,591837043 | 1,695987754 | 1,587776831 | 1,896847918 |
| <i>Cep68</i>         | 0,873295891 | 1,631483695 | 1,667332109 | 1,566998504 | 1,899752128 |
| <i>Pan3</i>          | 0,962873626 | 1,630399101 | 1,752345055 | 1,623658514 | 1,800470846 |
| <i>Pvt1</i>          | 0,758947212 | 1,555275445 | 1,495531581 | 1,629561032 | 1,61418662  |
| <i>Psmc8</i>         | 0,801736832 | 1,576441985 | 1,40784527  | 1,634288282 | 1,624258671 |
| <i>Ccdc97</i>        | 0,882630479 | 1,556794722 | 1,423118594 | 1,551293432 | 1,693329166 |
| <i>Acin1</i>         | 0,842592533 | 1,451314772 | 1,589476217 | 1,566418883 | 1,74279081  |
| <i>Ube2h</i>         | 0,794225706 | 1,466335653 | 1,523585484 | 1,621967236 | 1,832935954 |
| <i>H2-Ke2</i>        | 0,802472512 | 1,750693058 | 1,518674186 | 1,797296816 | 1,604665859 |
| <i>Me2</i>           | 0,833688455 | 1,760630316 | 1,541446159 | 1,806008812 | 1,61124979  |
| <i>Gm7457</i>        | 0,761260853 | 1,802404861 | 1,645791846 | 1,823920794 | 1,631030575 |
| <i>Gstp1</i>         | 0,935700884 | 1,718813302 | 1,709401551 | 1,713176246 | 1,508698222 |
| <i>2310010J17Rik</i> | 0,869068288 | 1,737356995 | 1,69113995  | 1,762168412 | 1,537292794 |
| <i>Dad1</i>          | 0,79116035  | 1,85871772  | 1,569707651 | 1,584028131 | 1,553046908 |
| <i>BC017612</i>      | 0,822870595 | 1,884557276 | 1,566136965 | 1,692398606 | 1,435286135 |
| <i>Faah</i>          | 1,002852272 | 1,860381019 | 1,495921833 | 1,724604016 | 1,734991307 |
| <i>Tnfrsf18</i>      | 1,067374789 | 1,902404403 | 1,392952691 | 1,742590242 | 1,559915036 |
| <i>Rab1</i>          | 0,483263415 | 1,443954284 | 1,821321762 | 1,685554051 | 1,839341854 |
| <i>Rpf1</i>          | 0,510370102 | 1,51048843  | 1,833061125 | 1,763229533 | 1,889284137 |
| <i>Pafah1b1</i>      | 0,434008595 | 1,539396197 | 1,751289535 | 1,733394045 | 1,852049331 |
| <i>Ifit3</i>         | 0,530056589 | 1,576377139 | 1,827630896 | 1,72306448  | 1,695909887 |
| <i>Skp1a</i>         | 0,701549891 | 1,48239597  | 1,819306622 | 1,838767215 | 1,737213753 |
| <i>Mad2l1bp</i>      | 0,614570801 | 1,454789331 | 1,930747663 | 1,903270832 | 1,870539412 |



|                      |             |             |             |             |             |
|----------------------|-------------|-------------|-------------|-------------|-------------|
| <i>Cish</i>          | 0,57082678  | 1,537762348 | 1,788852006 | 1,772901787 | 2,040366659 |
| <i>Tmem50a</i>       | 0,597924663 | 1,598184513 | 1,678401142 | 1,732358151 | 2,024849387 |
| <i>Srsf6</i>         | 0,682963923 | 1,454200646 | 1,714153862 | 1,816428752 | 1,997483669 |
| <i>Fam105b</i>       | 0,680350693 | 1,489672974 | 1,714958599 | 1,85991354  | 1,988541265 |
| <i>Skap1</i>         | 0,80448165  | 1,612290598 | 1,768122614 | 1,760277881 | 1,927067433 |
| <i>Fgd3</i>          | 0,736856792 | 1,619438457 | 1,751028014 | 1,841540329 | 1,908319325 |
| <i>Thrap3</i>        | 0,775828833 | 1,552709046 | 1,744527174 | 1,777159678 | 2,048069969 |
| <i>Tnip1</i>         | 0,799400806 | 1,553331056 | 1,747380543 | 1,724748584 | 1,998384822 |
| <i>Ppp3r1</i>        | 0,65204944  | 1,667347178 | 1,9589993   | 1,759044572 | 1,929276314 |
| <i>G3bp2</i>         | 0,768086636 | 1,623015155 | 1,902729992 | 1,765424236 | 1,925618458 |
| <i>Etf1</i>          | 0,553820994 | 1,583701022 | 1,913307842 | 1,746154023 | 1,945211032 |
| <i>Dync1li2</i>      | 0,778490957 | 1,581520533 | 1,834637904 | 1,65781418  | 1,881036207 |
| <i>2410066E13Rik</i> | 0,804041315 | 1,570349875 | 1,795308784 | 1,642369242 | 1,919647098 |
| <i>Rpl7</i>          | 0,782383894 | 1,536452874 | 1,923853728 | 1,692941473 | 1,806178004 |
| <i>Zbtb2</i>         | 0,845972847 | 1,711661597 | 2,000061886 | 1,724859193 | 1,921982242 |
| <i>Ak2</i>           | 0,788774295 | 1,634127443 | 2,050899497 | 1,774693562 | 1,982407625 |
| <i>Glr5</i>          | 0,802088827 | 1,643164845 | 2,006698333 | 1,585674079 | 1,999736521 |
| <i>Prps1l1</i>       | 0,74211252  | 1,486950028 | 2,094493839 | 1,65571414  | 1,810008828 |
| <i>Fpgs</i>          | 0,773032385 | 1,423284447 | 1,768733761 | 1,576543114 | 2,042876452 |
| <i>Mcm7</i>          | 0,830622706 | 1,336790571 | 1,764182011 | 1,574110177 | 2,101365232 |
| <i>St3gal1</i>       | 0,839130026 | 1,469085871 | 1,680744363 | 1,600188362 | 1,956351244 |
| <i>1700012B15Rik</i> | 0,871383106 | 1,443986906 | 1,672141225 | 1,617960306 | 1,995210815 |
| <i>Gtf3a</i>         | 0,902429479 | 1,380442271 | 1,65526429  | 1,598361362 | 1,990299214 |
| <i>Limk2</i>         | 0,863433739 | 1,324779567 | 1,686492026 | 1,439849148 | 1,994581599 |
| <i>1700042O10Rik</i> | 0,771071438 | 1,285396979 | 1,784433773 | 1,482281527 | 2,041314075 |
| <i>Gtpbp1</i>        | 0,732197555 | 1,397759201 | 1,71658058  | 1,458466248 | 1,948276018 |
| <i>Rad21</i>         | 0,866729837 | 1,370299733 | 1,809124064 | 1,567579455 | 1,995995629 |
| <i>Ifnar2</i>        | 0,914690835 | 1,361643316 | 1,788238    | 1,543996725 | 1,987676258 |
| <i>Vamp8</i>         | 0,92800946  | 1,410265074 | 1,863549684 | 1,553392546 | 1,985010596 |
| <i>Evi2b</i>         | 0,910270548 | 1,309834882 | 1,88785194  | 1,571785764 | 1,995026818 |
| <i>Trim41</i>        | 0,955500804 | 1,345915348 | 1,784834857 | 1,55990502  | 2,064828324 |
| <i>Ppp1r15a</i>      | 0,917745951 | 1,225001052 | 1,907936597 | 1,530701331 | 1,910816243 |
| <i>Elovl6</i>        | 1,042757946 | 1,393534245 | 1,765725458 | 1,579441795 | 1,864534686 |
| <i>Snx17</i>         | 0,934567612 | 1,392288619 | 1,828969766 | 1,568034993 | 1,738092729 |
| <i>BC005537</i>      | 0,930290828 | 1,419619536 | 1,890360793 | 1,516732383 | 1,850391269 |
| <i>Nfam1</i>         | 0,933595788 | 1,467505357 | 1,814716337 | 1,575845238 | 1,907222368 |
| <i>Kat5</i>          | 0,92164878  | 1,391733004 | 1,734665773 | 1,445496028 | 1,883858157 |
| <i>Tnrc6c</i>        | 0,967589566 | 1,448980269 | 1,758197185 | 1,486969374 | 1,89326433  |
| <i>Ralgds</i>        | 0,921939561 | 1,39239322  | 1,837082769 | 1,38588854  | 1,796947631 |
| <i>4933407C03Rik</i> | 0,974630721 | 1,45951042  | 1,659830721 | 1,398155958 | 1,771265427 |
| <i>Usp19</i>         | 0,992474422 | 1,470863044 | 1,625649731 | 1,469725758 | 1,809016386 |
| <i>Inpp5b</i>        | 0,857538677 | 1,480079985 | 1,704276809 | 1,47978306  | 1,778505837 |
| <i>Rab8b</i>         | 0,931315759 | 1,587670666 | 1,698798027 | 1,49353071  | 1,888275238 |
| <i>Relt</i>          | 0,88921388  | 1,515024959 | 1,725942025 | 1,460366324 | 1,874088849 |
| <i>Zbtb17</i>        | 0,907913088 | 1,344473926 | 1,602242875 | 1,493206971 | 1,764001847 |
| <i>Upf1</i>          | 0,977027228 | 1,32817409  | 1,656068843 | 1,529685196 | 1,87571985  |
| <i>Strada</i>        | 0,841065115 | 1,404246732 | 1,676006967 | 1,629879783 | 1,810492328 |
| <i>Rplp0</i>         | 0,799849158 | 1,348801436 | 1,648729722 | 1,619871083 | 1,797344872 |
| <i>Sumo2</i>         | 0,841151872 | 1,378300263 | 1,707763793 | 1,598012255 | 1,73356458  |
| <i>Topors</i>        | 0,567530512 | 1,372749025 | 1,645595147 | 1,747705948 | 1,76923267  |
| <i>Gm12359</i>       | 0,606974404 | 1,30705137  | 1,55643168  | 1,748463173 | 1,849695335 |

|                      |             |             |             |             |             |
|----------------------|-------------|-------------|-------------|-------------|-------------|
| <i>Eif5</i>          | 0,600146397 | 1,319381236 | 1,477354032 | 1,753795109 | 1,716831558 |
| <i>Atp5j2</i>        | 0,630870948 | 1,406581311 | 1,591851542 | 1,619504595 | 1,750480201 |
| <i>Wtap</i>          | 0,605831706 | 1,414844034 | 1,594233752 | 1,652510757 | 1,842288456 |
| <i>Rps3a</i>         | 0,748940895 | 1,356784925 | 1,615002362 | 1,754488301 | 1,95825306  |
| <i>Lamtor3</i>       | 0,778426591 | 1,351743651 | 1,608214726 | 1,781974965 | 1,823452595 |
| <i>Fam69a</i>        | 0,675601038 | 1,435950959 | 1,533251039 | 1,831245146 | 1,897512136 |
| <i>2310036O22Rik</i> | 0,823891676 | 1,150593304 | 1,687668697 | 1,73204915  | 1,749761707 |
| <i>Ppp4c</i>         | 0,747986607 | 1,244058944 | 1,761775017 | 1,702695933 | 1,7384711   |
| <i>Rpl3</i>          | 0,654982016 | 1,132090512 | 1,580674502 | 1,715665666 | 1,883399477 |
| <i>Gne</i>           | 0,767734291 | 1,233762036 | 1,655536764 | 1,630581577 | 1,881751949 |
| <i>Nr1h3</i>         | 0,892544878 | 1,21329662  | 1,69559796  | 1,67333976  | 1,985984428 |
| <i>Rbm3</i>          | 0,740419937 | 1,154022672 | 1,768492292 | 1,731357476 | 2,016459183 |
| <i>Crb3</i>          | 0,950261628 | 1,19903509  | 1,480274744 | 1,833926536 | 1,880391847 |
| <i>Qrfp</i>          | 0,941184192 | 1,29407041  | 1,423596383 | 1,855187571 | 1,801712388 |
| <i>Kri1</i>          | 0,860793129 | 1,291537245 | 1,547076345 | 1,900775725 | 1,92778955  |
| <i>Sh2d3c</i>        | 0,839765397 | 1,51773293  | 1,627047388 | 1,986386894 | 2,168006011 |
| <i>2610002J02Rik</i> | 0,84275343  | 1,489420349 | 1,622996945 | 2,049881119 | 2,037449917 |
| <i>Fam83e</i>        | 0,813043359 | 1,449889585 | 1,578964436 | 1,879991468 | 2,068370112 |
| <i>Pnn</i>           | 0,954373355 | 1,454535869 | 1,432842514 | 2,045800395 | 1,941694024 |
| <i>B930003M22Rik</i> | 0,774848208 | 1,226074848 | 1,590599207 | 2,051833053 | 2,016785176 |
| <i>Csnk1a1</i>       | 0,709564    | 2,123004531 | 2,084669683 | 1,996987441 | 2,001904348 |
| <i>Prpf38b</i>       | 0,735590037 | 2,040994867 | 2,101892221 | 1,939640392 | 1,966690569 |
| <i>Mbp</i>           | 0,954253862 | 2,148121005 | 2,004780549 | 1,964420833 | 2,045640326 |
| <i>March7</i>        | 0,807596804 | 1,891130638 | 2,081879285 | 2,094078925 | 2,149123994 |
| <i>Fus</i>           | 0,862460694 | 1,947039274 | 2,039997799 | 2,130529145 | 2,235373585 |
| <i>Cd9</i>           | 1,076361694 | 1,974521526 | 1,799009573 | 2,032555737 | 2,076449598 |
| <i>Tgfb1</i>         | 0,958730781 | 2,059533243 | 1,815249832 | 2,027661328 | 1,920581987 |
| <i>lkbke</i>         | 0,936187581 | 1,832921728 | 1,792805197 | 2,055591193 | 2,002548391 |
| <i>Fam3c</i>         | 0,861455767 | 1,938661134 | 1,912687243 | 2,094914107 | 1,993764948 |
| <i>Eno3</i>          | 1,08228924  | 1,993256453 | 1,912586297 | 1,74874569  | 2,035510282 |
| <i>Eno1</i>          | 1,007103534 | 1,965487161 | 1,802458228 | 1,830887853 | 2,063971288 |
| <i>3110056K07Rik</i> | 0,835615909 | 2,081821426 | 1,926314664 | 1,664640056 | 1,953572252 |
| <i>Cbx3</i>          | 0,884817847 | 1,951859278 | 1,90458377  | 1,697868617 | 1,95330121  |
| <i>Folr4</i>         | 0,968907365 | 1,926970543 | 1,917106133 | 1,958261535 | 1,884132514 |
| <i>Rheb</i>          | 0,959831789 | 1,886378832 | 1,847104291 | 1,822577771 | 1,932481682 |
| <i>Arf1</i>          | 0,926760334 | 1,848189003 | 2,059381316 | 1,865624344 | 1,951114044 |
| <i>Lonp2</i>         | 0,808100687 | 1,918571753 | 2,035510951 | 1,802402423 | 1,962595976 |
| <i>Epc1</i>          | 0,971286979 | 1,759963117 | 1,950692769 | 1,801416068 | 2,115599511 |
| <i>Ywhag</i>         | 0,959811588 | 1,736485264 | 1,957148736 | 1,785261385 | 2,055515631 |
| <i>Tpm3</i>          | 0,898406998 | 1,823872604 | 1,999231295 | 1,846741213 | 2,075466299 |
| <i>Fbxo11</i>        | 1,012097955 | 1,855454859 | 2,065837413 | 1,79650567  | 2,100405434 |
| <i>Ifnar1</i>        | 0,943762178 | 1,795871333 | 1,996870067 | 1,908523823 | 2,222246505 |
| <i>Stt3b</i>         | 0,984646985 | 1,760517644 | 2,017418295 | 1,931007663 | 2,129307805 |
| <i>Tra2b</i>         | 0,802773013 | 1,746894188 | 2,081439249 | 1,829664204 | 2,024125552 |
| <i>Osbp18</i>        | 0,768122671 | 1,74104557  | 2,029109528 | 1,818101193 | 2,105300268 |
| <i>Ube2d3</i>        | 0,770965011 | 1,824555025 | 1,960439823 | 1,872476526 | 2,064037179 |
| <i>Gng5</i>          | 0,769805225 | 1,84216942  | 1,981400144 | 1,822288528 | 2,089777025 |
| <i>Ppp2r2a</i>       | 0,722195638 | 1,812673264 | 2,008911354 | 1,881228204 | 2,111644636 |
| <i>Ywhae</i>         | 0,826177965 | 1,866143057 | 2,122286896 | 1,905201436 | 2,142398045 |
| <i>Sdr39u1</i>       | 1,039126699 | 1,69326337  | 1,730858518 | 1,951167342 | 2,002969852 |
| <i>Mkl1</i>          | 1,022308233 | 1,660772777 | 1,80447856  | 1,891825709 | 2,010805519 |

|                      |             |             |             |             |             |
|----------------------|-------------|-------------|-------------|-------------|-------------|
| <i>Arhgef3</i>       | 0,973939175 | 1,660145234 | 1,779306501 | 1,829461477 | 1,949999652 |
| <i>Arhgap27</i>      | 0,973027635 | 1,656262402 | 1,706089264 | 1,858809079 | 1,94991654  |
| <i>Pip4k2b</i>       | 1,058857814 | 1,746283403 | 1,821763005 | 1,985353105 | 2,066805714 |
| <i>Fntb</i>          | 0,994384852 | 1,756500593 | 1,877492506 | 1,921525359 | 2,078963277 |
| <i>Atp5b</i>         | 1,062583262 | 1,622843405 | 1,944791736 | 1,740755368 | 2,019323008 |
| <i>Morn3</i>         | 1,062403181 | 1,635984898 | 1,901208359 | 1,819116382 | 1,974581889 |
| <i>Rab5c</i>         | 1,003695519 | 1,730993722 | 2,01055882  | 1,808456192 | 1,972304279 |
| <i>Spn</i>           | 1,01489197  | 1,791862422 | 1,959451809 | 1,815798961 | 2,071864193 |
| <i>Prr12</i>         | 1,067620339 | 1,764353322 | 1,936221727 | 1,822658342 | 2,017623085 |
| <i>Bptf</i>          | 1,079293761 | 1,7477054   | 1,932315512 | 1,758590028 | 2,083190917 |
| <i>Tada2b</i>        | 0,877502031 | 1,763978767 | 1,867308074 | 1,719416386 | 1,791472959 |
| <i>Morf4l1</i>       | 1,024511375 | 1,754415367 | 1,896080979 | 1,705224351 | 1,870139915 |
| <i>Zfand3</i>        | 0,871865493 | 1,692985153 | 1,75051616  | 1,723789903 | 1,890800825 |
| <i>Sh3glb1</i>       | 0,908463546 | 1,722280324 | 1,756760672 | 1,682776279 | 1,936780641 |
| <i>Axin2</i>         | 0,90387203  | 1,731272991 | 1,806363353 | 1,739479152 | 1,965009815 |
| <i>Lrch1</i>         | 0,847420281 | 1,679980926 | 1,816053967 | 1,654790612 | 1,949769724 |
| <i>Ppp2ca</i>        | 0,757855398 | 1,708791637 | 1,926394406 | 1,831642784 | 1,945431772 |
| <i>Wdr82</i>         | 0,801010174 | 1,766487756 | 1,982306175 | 1,808284318 | 1,928384961 |
| <i>Eif4g2</i>        | 0,835856872 | 1,733148953 | 1,853764217 | 1,880363573 | 1,893182392 |
| <i>Brd1</i>          | 0,875592775 | 1,680023225 | 1,934429181 | 1,884966299 | 2,233695736 |
| <i>Nfkbid</i>        | 0,846350666 | 1,772969687 | 1,843136656 | 1,876795575 | 2,176902608 |
| <i>Plaur</i>         | 0,859425924 | 1,72024305  | 1,828936876 | 1,784718673 | 2,096620012 |
| <i>Zfp526</i>        | 0,89109107  | 1,649627114 | 1,810043932 | 1,824056325 | 2,128338636 |
| <i>BC006779</i>      | 0,744231267 | 1,637498127 | 1,825817082 | 1,822109355 | 2,202366758 |
| <i>Rpsa</i>          | 0,766744512 | 1,64615095  | 1,729872838 | 1,821690602 | 2,257134765 |
| <i>Psme2</i>         | 0,882044794 | 1,630665237 | 1,73178321  | 1,853488722 | 2,270919601 |
| <i>Chkb</i>          | 0,954132824 | 1,833654247 | 1,741159465 | 1,871346189 | 2,245687637 |
| <i>D17Wsu92e</i>     | 0,769688196 | 1,743550762 | 1,850709568 | 1,896152014 | 2,053309628 |
| <i>Ubash3b</i>       | 0,855940907 | 1,762229319 | 1,83076666  | 1,867620325 | 1,997871035 |
| <i>Clint1</i>        | 0,847940249 | 1,711077758 | 1,783965329 | 1,996363089 | 2,075174053 |
| <i>6720456B07Rik</i> | 0,711320206 | 1,876046268 | 1,794326316 | 1,959992707 | 2,028911596 |
| <i>Acvrl1</i>        | 0,771511147 | 1,859132392 | 1,824534243 | 2,031874473 | 2,086719184 |
| <i>Ranbp9</i>        | 0,870373945 | 1,642173604 | 1,89276773  | 1,851314932 | 2,0163683   |
| <i>Lcp1</i>          | 0,895411401 | 1,582244698 | 1,930360576 | 1,798898594 | 2,055587487 |
| <i>Eif4ebp2</i>      | 0,771459088 | 1,579342055 | 1,922688915 | 1,822354338 | 2,124933271 |
| <i>Ankrd44</i>       | 0,778147847 | 1,628666865 | 1,936368261 | 1,826364359 | 2,064155325 |
| <i>Tardbp</i>        | 0,877482016 | 1,587750445 | 2,010747359 | 1,892097392 | 2,150459906 |
| <i>6330409D20Rik</i> | 0,812052144 | 1,578396501 | 1,810665195 | 1,913129227 | 2,129407414 |
| <i>Chmp4b</i>        | 0,816130657 | 1,570867666 | 1,815270562 | 1,877478771 | 2,133862851 |
| <i>Ccnl2</i>         | 0,754857751 | 1,565825477 | 1,861935031 | 1,954612291 | 2,039240174 |
| <i>Zfp292</i>        | 0,674046367 | 1,692990857 | 1,913789669 | 1,829015049 | 2,071716744 |
| <i>Pcnp</i>          | 0,674642873 | 1,668719332 | 1,828748538 | 1,861714546 | 2,071554913 |
| <i>Rbm39</i>         | 0,696253761 | 1,664815233 | 1,947590596 | 1,862563663 | 2,197680714 |
| <i>Lmo4</i>          | 0,956042318 | 1,728111622 | 1,992131522 | 1,605536702 | 1,905309232 |
| <i>Maml1</i>         | 1,072287146 | 1,760537959 | 1,92174087  | 1,554885694 | 1,931074908 |
| <i>Ppp2r5d</i>       | 0,983302738 | 1,912204186 | 2,020399362 | 1,566126404 | 1,960866606 |
| <i>Atp6v1g1</i>      | 1,132316737 | 1,89584905  | 1,965154268 | 1,424843369 | 1,872846577 |
| <i>Nhp2</i>          | 1,084700774 | 1,759329731 | 2,230997825 | 1,435098798 | 2,091851211 |
| <i>Slc25a4</i>       | 1,01215636  | 1,852462808 | 2,064731383 | 1,539587162 | 2,196012204 |
| <i>BC056474</i>      | 0,912021588 | 2,095290533 | 1,941740507 | 1,375345755 | 2,104306316 |
| <i>Wdr8</i>          | 0,96870386  | 0,902122757 | 1,108921983 | 0,914606969 | 1,380260796 |

|                      |             |             |             |             |             |
|----------------------|-------------|-------------|-------------|-------------|-------------|
| <i>Iqcd</i>          | 1,021480785 | 0,913147361 | 1,12981039  | 0,88056572  | 1,352566217 |
| <i>C630004H02Rik</i> | 1,046997332 | 0,813830327 | 1,095074245 | 0,842153106 | 1,36617008  |
| <i>Acads</i>         | 1,069042077 | 0,890277295 | 0,96749619  | 0,851285291 | 1,318204841 |
| <i>Eme2</i>          | 0,948439607 | 0,756732243 | 1,076199753 | 1,061216325 | 1,467268719 |
| <i>Ctu2</i>          | 1,060303125 | 0,750102463 | 1,002806233 | 1,088094128 | 1,463816051 |
| <i>Asb6</i>          | 0,944473512 | 0,824323898 | 1,045078268 | 0,968829842 | 1,405076572 |
| <i>Acbd4</i>         | 0,957129267 | 0,790314484 | 1,044123651 | 1,013625697 | 1,34676784  |
| <i>Polm</i>          | 0,850025226 | 0,837235654 | 1,187014324 | 0,992338726 | 1,378334343 |
| <i>Col11a2</i>       | 1,016094041 | 0,897151921 | 1,115402703 | 1,043362998 | 1,42624722  |
| <i>Zfp13</i>         | 1,069601656 | 0,962893455 | 1,124341366 | 1,059237213 | 1,38783992  |
| <i>Plekhm1</i>       | 1,066215161 | 0,959600253 | 1,202893693 | 0,932337639 | 1,394755812 |
| <i>Ncaph2</i>        | 0,734029086 | 0,99277632  | 1,095230807 | 0,967899112 | 1,423813156 |
| <i>Mrps18b</i>       | 0,797816087 | 1,002948442 | 1,095562359 | 0,891644959 | 1,404556347 |
| <i>Mamdc4</i>        | 0,88857837  | 0,989235954 | 1,053192546 | 1,032905689 | 1,459223841 |
| <i>Dbn1</i>          | 0,911719792 | 1,041321292 | 1,116092917 | 0,992128231 | 1,471678377 |
| <i>Ly6g5c</i>        | 0,862746926 | 1,036833934 | 1,125988444 | 0,85880928  | 1,509907206 |
| <i>Tmem181b-ps</i>   | 0,843525649 | 0,927910932 | 1,029385897 | 0,833343093 | 1,480394253 |
| <i>Osgin1</i>        | 0,911278732 | 0,939414484 | 1,007067944 | 0,860889852 | 1,470666336 |
| <i>Gtpbp3</i>        | 0,90765158  | 1,015615615 | 0,956235566 | 0,855929774 | 1,388864413 |
| <i>Ndufc2</i>        | 0,762798371 | 0,854976274 | 0,965594042 | 0,911065355 | 1,526127082 |
| <i>Neurl4</i>        | 0,797249735 | 0,879399929 | 1,020199631 | 0,912877404 | 1,589420835 |
| <i>Rps6ka4</i>       | 0,835345939 | 0,896119465 | 1,055725935 | 0,98564036  | 1,543440772 |
| <i>Mrpl14</i>        | 0,924466936 | 1,120425464 | 0,951417004 | 1,194368515 | 1,593897165 |
| <i>Kat2a</i>         | 0,900626345 | 1,110799114 | 0,918735257 | 1,121987015 | 1,60794652  |
| <i>Elov1</i>         | 0,982423161 | 1,26433937  | 0,902260648 | 0,970089487 | 1,476615939 |
| <i>Pih1d1</i>        | 1,059014253 | 1,083694593 | 0,993891821 | 1,192804352 | 1,46091857  |
| <i>Igfals</i>        | 1,136543014 | 1,237394921 | 1,018905151 | 1,175308887 | 1,563362033 |
| <i>6030408B16Rik</i> | 1,192751775 | 1,100028986 | 0,919648153 | 1,067569357 | 1,53365514  |
| <i>Nr2c2ap</i>       | 1,032031808 | 0,987295132 | 1,270794509 | 1,028277838 | 1,701711628 |
| <i>Rnf181</i>        | 1,042680984 | 1,079507238 | 1,306450394 | 1,029076667 | 1,716822966 |
| <i>Bai2</i>          | 1,15122971  | 0,986951403 | 1,264954808 | 0,829889913 | 1,70395592  |
| <i>Myl6b</i>         | 0,893714539 | 1,130214795 | 1,28920029  | 0,769612833 | 1,673647677 |
| <i>Tm9sf1</i>        | 0,972054608 | 0,938234493 | 1,330389236 | 1,004802318 | 1,549182555 |
| <i>Cox4nb</i>        | 0,886193141 | 0,909909958 | 1,307571262 | 1,013403237 | 1,547818242 |
| <i>Ap1ar</i>         | 0,897337724 | 1,0214495   | 1,379152206 | 0,974044479 | 1,56243901  |
| <i>Eml3</i>          | 0,896830417 | 0,903209723 | 1,3806911   | 0,935699727 | 1,698535431 |
| <i>Slc25a10</i>      | 1,053076907 | 0,974215576 | 1,045755454 | 0,777730769 | 1,513086713 |
| <i>Dnd1</i>          | 1,101622148 | 0,906725942 | 1,049879334 | 0,814183697 | 1,685305342 |
| <i>Furin</i>         | 0,962917695 | 0,910819064 | 1,209444725 | 0,928683314 | 1,58858326  |
| <i>Coro2a</i>        | 0,928184239 | 0,822191693 | 1,146937418 | 0,897016378 | 1,634990322 |
| <i>Ngfrap1</i>       | 0,786564675 | 0,679667814 | 1,059416784 | 1,14685046  | 1,717110674 |
| <i>Ppapdc2</i>       | 0,907963828 | 0,626391179 | 0,911848261 | 1,070901205 | 1,685414179 |
| <i>Pcyt2</i>         | 0,95616852  | 0,827516299 | 1,001614465 | 1,154258304 | 1,727715261 |
| <i>Vps28</i>         | 1,031982441 | 0,79050457  | 1,07465576  | 0,995405955 | 1,801165936 |
| <i>Lcn4</i>          | 0,848203088 | 0,753304798 | 1,147486843 | 1,122821781 | 1,534589374 |
| <i>Rpl13</i>         | 0,825808331 | 0,748429287 | 1,211494923 | 1,213308283 | 1,662675022 |
| <i>B4galt3</i>       | 0,902079036 | 0,951778986 | 1,241048445 | 1,017107436 | 1,741555422 |
| <i>Ift27</i>         | 1,002521512 | 0,953124063 | 1,156987826 | 1,032099862 | 1,628192784 |
| <i>Eif3k</i>         | 0,922175698 | 1,048888544 | 1,104565118 | 1,101776203 | 1,728510831 |
| <i>Tomm22</i>        | 0,978535711 | 0,913999779 | 1,14969982  | 1,113392486 | 1,778651884 |
| <i>Tprgl</i>         | 0,802090555 | 0,968556889 | 1,132053579 | 1,193539797 | 1,783108554 |

|                      |             |             |             |             |             |
|----------------------|-------------|-------------|-------------|-------------|-------------|
| <i>Rnf7</i>          | 0,784856319 | 0,986567476 | 1,031060201 | 1,156587991 | 1,685474547 |
| <i>O610007P22Rik</i> | 0,869024339 | 0,872297382 | 1,029222756 | 0,714976766 | 1,462952164 |
| <i>Prtn3</i>         | 0,784897903 | 0,811206539 | 0,990783083 | 0,826880574 | 1,498912674 |
| <i>Pmm2</i>          | 0,71211039  | 0,918685321 | 0,864915537 | 0,739952119 | 1,337599854 |
| <i>Ddah2</i>         | 1,015724503 | 0,938130202 | 0,831969081 | 0,542249951 | 1,573451941 |
| <i>Fv1</i>           | 0,843077851 | 0,91860687  | 0,82697281  | 0,95836895  | 1,51658139  |
| <i>Gpr151</i>        | 0,805226053 | 1,070057194 | 0,838865862 | 0,808845123 | 1,53974068  |
| <i>Ube2s</i>         | 0,989172479 | 0,994911421 | 0,798380327 | 0,947575556 | 1,443370835 |
| <i>Fam113a</i>       | 1,028406241 | 0,988512206 | 0,813347992 | 0,860383574 | 1,373820248 |
| <i>Trim65</i>        | 0,919931284 | 0,865053441 | 0,677280668 | 0,863398235 | 1,666625615 |
| <i>Syt11</i>         | 1,09395967  | 0,726484687 | 0,936943285 | 0,962036016 | 1,300233643 |
| <i>Nxn1</i>          | 1,152561696 | 0,715896192 | 1,004071102 | 0,942655686 | 1,401348851 |
| <i>Tk1</i>           | 1,061792891 | 0,619960385 | 0,831652658 | 1,042105326 | 1,344729415 |
| <i>AV051173</i>      | 1,075888494 | 0,556698217 | 0,860482818 | 0,789955397 | 1,465980159 |
| <i>Uck1</i>          | 1,273089884 | 0,813629552 | 1,083040658 | 1,102577562 | 1,670848932 |
| <i>Nhlrc1</i>        | 1,201978211 | 0,876684547 | 0,896086055 | 0,957683043 | 1,558453836 |
| <i>Pcsk4</i>         | 0,996478751 | 1,02619656  | 0,847439646 | 1,29804727  | 1,502030469 |
| <i>Nme2</i>          | 1,099373523 | 0,891758935 | 0,840624798 | 1,377761979 | 1,381750264 |
| <i>Zbtb48</i>        | 1,099709707 | 0,850952907 | 0,793337364 | 1,205447809 | 1,541661809 |
| <i>Dohh</i>          | 0,945343509 | 0,777028527 | 0,768400547 | 1,310240155 | 1,311581978 |
| <i>Gps1</i>          | 0,969674164 | 0,563407928 | 0,819962608 | 1,277339977 | 1,37232804  |
| <i>Man1c1</i>        | 0,517389174 | 0,832507314 | 1,060310549 | 1,431147717 | 1,447145307 |
| <i>Adh5</i>          | 0,491414746 | 0,898635546 | 1,001415661 | 1,238306097 | 1,397386665 |
| <i>Cd151</i>         | 0,666030607 | 0,795941562 | 1,067942714 | 1,352579238 | 1,416916422 |
| <i>Traf5</i>         | 0,673161277 | 0,8155011   | 1,093280133 | 1,274541968 | 1,48848386  |
| <i>Exosc8</i>        | 0,644195941 | 0,816119536 | 1,160908467 | 1,218570858 | 1,41498814  |
| <i>Ap2m1</i>         | 0,61195232  | 0,87603667  | 0,928833084 | 1,344397048 | 1,431090273 |
| <i>Fasn</i>          | 0,609589708 | 0,949300533 | 0,854597963 | 1,363169153 | 1,326214171 |
| <i>Kcnj15</i>        | 0,707338179 | 0,798718273 | 0,937075523 | 1,287819208 | 1,258379606 |
| <i>F730035M05Rik</i> | 0,635170531 | 0,732346548 | 0,887642887 | 1,354954928 | 1,2464027   |
| <i>Pts</i>           | 0,637244457 | 0,895323341 | 1,049595601 | 1,236367862 | 1,284570403 |
| <i>Hmgcr</i>         | 0,599284363 | 0,823880073 | 1,066159264 | 1,2248177   | 1,253736107 |
| <i>Abcf1</i>         | 0,616644161 | 0,93050795  | 1,106572106 | 1,207583318 | 1,23727414  |
| <i>Bcas2</i>         | 0,627629944 | 0,887406205 | 1,136356628 | 1,219760093 | 1,241582366 |
| <i>Dopey2</i>        | 0,641239316 | 0,813919299 | 1,050547996 | 1,147000542 | 1,227320023 |
| <i>Kdm3b</i>         | 0,723334649 | 0,877328011 | 1,032583265 | 1,134914565 | 1,236942051 |
| <i>Cdk2</i>          | 0,743536282 | 0,75953664  | 1,117004713 | 1,199946877 | 1,158555214 |
| <i>S100a11</i>       | 0,728096094 | 0,920528227 | 1,220363268 | 1,152732015 | 1,254993682 |
| <i>Dscr3</i>         | 0,675548662 | 0,898271953 | 1,178070254 | 1,159951489 | 1,276882112 |
| <i>Trappc5</i>       | 0,724630052 | 0,939188055 | 1,189428862 | 1,222255629 | 1,233012117 |
| <i>Taf5l</i>         | 0,757571517 | 0,905305995 | 1,189515566 | 1,180919218 | 1,331876862 |
| <i>Pebp1</i>         | 0,784731158 | 0,843538005 | 1,178322383 | 1,143006821 | 1,304129896 |
| <i>Ccdc84</i>        | 0,601516433 | 0,966977432 | 1,147542484 | 1,352930078 | 1,215420808 |
| <i>Tmem8</i>         | 0,608539883 | 0,920926208 | 1,116590258 | 1,297189427 | 1,185096329 |
| <i>Eef1b2</i>        | 0,614062229 | 0,905978073 | 1,233325645 | 1,239170746 | 1,125907552 |
| <i>Safb</i>          | 0,54711275  | 0,820879816 | 1,175722734 | 1,326785304 | 1,309007448 |
| <i>Mtrf1l</i>        | 0,560869584 | 0,835030148 | 1,130268294 | 1,295200374 | 1,265537041 |
| <i>Dus3l</i>         | 0,496954049 | 0,568906397 | 1,186901166 | 1,289608752 | 1,261399438 |
| <i>Pcna</i>          | 0,733443991 | 0,442058606 | 1,154602017 | 1,270201837 | 1,393653168 |
| <i>Otub1</i>         | 0,811189976 | 0,704422297 | 1,187201401 | 1,450790697 | 1,362037793 |
| <i>1700011J10Rik</i> | 0,806652953 | 1,17398495  | 1,234520009 | 1,281491662 | 1,547209759 |

|                      |             |             |             |             |             |
|----------------------|-------------|-------------|-------------|-------------|-------------|
| <i>Cyth2</i>         | 0,875785868 | 1,235611799 | 1,147766202 | 1,215520833 | 1,513498418 |
| <i>Tor1b</i>         | 0,678305472 | 1,185143809 | 1,094636903 | 1,203734926 | 1,556672246 |
| <i>Cc2d1a</i>        | 0,781796213 | 1,152303133 | 1,035507709 | 1,194236879 | 1,592733432 |
| <i>Ddx58</i>         | 0,723739712 | 1,124110231 | 1,170195159 | 1,241337324 | 1,511025779 |
| <i>Rnf40</i>         | 0,70697835  | 1,117041632 | 1,226853933 | 1,196084709 | 1,529097356 |
| <i>Unk</i>           | 0,776976881 | 1,126583374 | 1,146611462 | 1,183514557 | 1,556486777 |
| <i>Dcp2</i>          | 0,702470144 | 1,077575183 | 1,215892137 | 1,142471205 | 1,489881555 |
| <i>Fbxo32</i>        | 0,668178996 | 1,14817494  | 1,228942159 | 1,171886848 | 1,408313637 |
| <i>Gde1</i>          | 0,678630399 | 1,225405678 | 1,258794758 | 1,109737477 | 1,453940124 |
| <i>Nipal1</i>        | 0,749529567 | 1,207098473 | 1,217273111 | 1,199294441 | 1,468628578 |
| <i>Prpf8</i>         | 0,682502076 | 1,207065615 | 1,223968471 | 1,181715371 | 1,474218614 |
| <i>Hk1</i>           | 0,852847021 | 1,111849165 | 1,203885027 | 1,172092204 | 1,389699564 |
| <i>Sipa1l1</i>       | 0,850415295 | 1,129550375 | 1,249458188 | 1,205122148 | 1,374380865 |
| <i>Coq5</i>          | 0,767645534 | 1,103282711 | 1,24333608  | 1,186544798 | 1,431772678 |
| <i>Abl2</i>          | 0,7662929   | 1,096904522 | 1,259505986 | 1,177835806 | 1,420023336 |
| <i>Fbxo34</i>        | 0,794097104 | 1,138012265 | 1,266505658 | 1,229652178 | 1,437291826 |
| <i>Papd5</i>         | 0,828588493 | 1,133761746 | 1,288607763 | 1,2456637   | 1,464108556 |
| <i>Metap2</i>        | 0,813457517 | 1,096047755 | 1,32030791  | 1,182518706 | 1,425801158 |
| <i>Hmgcl</i>         | 0,867549381 | 1,025077239 | 1,246995052 | 1,251283198 | 1,424783741 |
| <i>Ddx23</i>         | 0,764704883 | 1,031288064 | 1,207769688 | 1,307224962 | 1,42285507  |
| <i>Patl2</i>         | 0,732552122 | 1,049664128 | 1,256081081 | 1,239154886 | 1,467183814 |
| <i>Gxylt1</i>        | 0,730681423 | 1,06021237  | 1,277184975 | 1,301150468 | 1,429766182 |
| <i>Nlk</i>           | 0,666668847 | 1,069611502 | 1,249762328 | 1,25008412  | 1,433863947 |
| <i>4921524J17Rik</i> | 0,670663264 | 1,077519765 | 1,288761692 | 1,240519148 | 1,434177577 |
| <i>PsmA6</i>         | 0,767633564 | 1,14856307  | 1,308762701 | 0,985950269 | 1,541887427 |
| <i>Rhobtb2</i>       | 0,766800477 | 1,147012532 | 1,28901327  | 1,038185714 | 1,494662557 |
| <i>Setd8</i>         | 0,808329699 | 1,145150334 | 1,224212746 | 1,038881978 | 1,581160797 |
| <i>Tmem150a</i>      | 0,826206234 | 1,007999567 | 1,282945577 | 1,11871483  | 1,505360644 |
| <i>Sv2a</i>          | 0,880104378 | 1,048884617 | 1,293781732 | 1,061013468 | 1,473427072 |
| <i>Fbxo31</i>        | 0,752771281 | 1,012657014 | 1,273393317 | 1,124754034 | 1,574878955 |
| <i>Tln1</i>          | 0,74295236  | 1,008002533 | 1,278362131 | 1,148378688 | 1,639913468 |
| <i>Cd72</i>          | 0,792755185 | 0,964728984 | 1,186422954 | 1,057570482 | 1,640270215 |
| <i>Nin</i>           | 0,702262265 | 0,952840865 | 1,148343174 | 1,080717745 | 1,341266592 |
| <i>Cox7a2</i>        | 0,711172499 | 0,920290556 | 1,137959857 | 1,093930462 | 1,391282172 |
| <i>Igsf3</i>         | 0,774669598 | 0,898121279 | 1,153095602 | 1,081381871 | 1,349292037 |
| <i>Slc25a28</i>      | 0,759035177 | 0,985307194 | 1,153285356 | 1,067748241 | 1,428627347 |
| <i>Trpv2</i>         | 0,754768252 | 0,980258432 | 1,108923493 | 1,126978253 | 1,4317686   |
| <i>Asb13</i>         | 0,798358572 | 0,919547958 | 1,222729948 | 1,167409492 | 1,403819493 |
| <i>Suv420h2</i>      | 0,792838184 | 0,954891168 | 1,196154327 | 1,149784383 | 1,386006773 |
| <i>Oxa1l</i>         | 0,749350898 | 0,982453984 | 1,205494641 | 1,14436197  | 1,431439248 |
| <i>Ndufs2</i>        | 0,728679784 | 0,868853521 | 1,046701062 | 1,112643983 | 1,444281834 |
| <i>Brf1</i>          | 0,768602738 | 0,869553907 | 1,071536619 | 1,195503706 | 1,381041605 |
| <i>Slc25a38</i>      | 0,637459731 | 0,978913559 | 1,048834323 | 1,136247737 | 1,498781913 |
| <i>Igfbp6</i>        | 0,735908404 | 0,965690693 | 0,996802543 | 1,228827543 | 1,495264361 |
| <i>Sh2b3</i>         | 0,724820721 | 0,971471887 | 1,116857886 | 1,200571403 | 1,550916448 |
| <i>Nans</i>          | 0,783248346 | 0,879516343 | 1,141229141 | 1,141285654 | 1,51684467  |
| <i>Psmb5</i>         | 0,863806551 | 0,933585019 | 1,265725933 | 1,128798008 | 1,250835852 |
| <i>Eri1</i>          | 0,879399355 | 1,016303688 | 1,336138923 | 1,157610189 | 1,27806396  |
| <i>Nkiras2</i>       | 0,934319762 | 1,011871995 | 1,269163136 | 1,117523539 | 1,403795421 |
| <i>Tceb3</i>         | 0,929035836 | 0,979917436 | 1,266432224 | 1,060496067 | 1,345764176 |
| <i>Ciapin1</i>       | 0,871157216 | 0,983312013 | 1,202746464 | 1,081087702 | 1,384315243 |

|                      |             |             |             |             |             |
|----------------------|-------------|-------------|-------------|-------------|-------------|
| <i>Anapc5</i>        | 0,89106585  | 1,010445937 | 1,212699627 | 1,181147783 | 1,237657883 |
| <i>Gm14005</i>       | 0,873041637 | 1,04778644  | 1,204876352 | 1,126663532 | 1,219047182 |
| <i>Irgq</i>          | 1,002063196 | 1,039160406 | 1,1625172   | 1,134779783 | 1,215752119 |
| <i>Rell1</i>         | 0,926137366 | 1,054269948 | 1,15839667  | 1,040573297 | 1,309860866 |
| <i>Rnasel</i>        | 0,86416119  | 1,061914707 | 1,123017388 | 1,017861203 | 1,370636245 |
| <i>S100a1</i>        | 0,846144688 | 1,044234758 | 1,131929063 | 1,168935307 | 1,357248006 |
| <i>Tfdp1</i>         | 0,87871662  | 1,022931557 | 1,193725321 | 1,150459322 | 1,339560688 |
| <i>Trim28</i>        | 0,900307931 | 0,9976853   | 1,083445985 | 1,16649468  | 1,404777349 |
| <i>Prpsap1</i>       | 0,875411602 | 1,016331346 | 1,123204607 | 1,126321399 | 1,39195974  |
| <i>Pkp3</i>          | 0,949175654 | 1,02931642  | 1,053066085 | 1,115656554 | 1,369558891 |
| <i>Ftsjd2</i>        | 0,943892657 | 0,920775669 | 1,110163364 | 1,082282419 | 1,320123772 |
| <i>E130309D02Rik</i> | 0,922254186 | 0,92679081  | 1,084052984 | 1,082505369 | 1,400479249 |
| <i>Mvp</i>           | 0,983392456 | 0,9726278   | 1,009512549 | 1,202505787 | 1,222122612 |
| <i>Sap30l</i>        | 1,073415586 | 1,015581977 | 1,021617701 | 1,106016701 | 1,286647858 |
| <i>Prr15l</i>        | 1,035072133 | 0,857656883 | 1,095783361 | 1,199081323 | 1,302146115 |
| <i>D10Jhu81e</i>     | 0,975327944 | 0,908436149 | 1,087810673 | 1,196061361 | 1,36620123  |
| <i>Prkaca</i>        | 1,033079499 | 1,081515647 | 1,156324048 | 1,258226234 | 1,301749199 |
| <i>Crtap</i>         | 1,015694002 | 1,062746146 | 1,088356755 | 1,305471637 | 1,313356207 |
| <i>Atp2a3</i>        | 1,013902319 | 1,016560971 | 1,141925983 | 1,283578986 | 1,369780918 |
| <i>Dtymk</i>         | 1,011464888 | 0,988693778 | 1,095798197 | 1,241513078 | 1,305871044 |
| <i>Wdr86</i>         | 0,966754568 | 0,993468579 | 1,163369266 | 1,252087091 | 1,286290512 |
| <i>Rrp36</i>         | 0,826866571 | 0,935532926 | 1,161253481 | 1,34465419  | 1,564576553 |
| <i>Acsf2</i>         | 0,732615645 | 0,945355925 | 1,252103032 | 1,343945199 | 1,541192166 |
| <i>Rpl14</i>         | 0,612263715 | 0,896343693 | 1,116293031 | 1,319646562 | 1,593752282 |
| <i>Acpt</i>          | 0,66984048  | 0,915039316 | 1,0615656   | 1,319665018 | 1,559311515 |
| <i>Ftsj3</i>         | 0,622363709 | 1,018927364 | 1,028862433 | 1,405307047 | 1,573999581 |
| <i>Arhgap25</i>      | 0,597007666 | 1,026409406 | 1,092990366 | 1,402238932 | 1,485922264 |
| <i>Rpl7l1</i>        | 0,631350023 | 1,065888087 | 0,99686759  | 1,441234026 | 1,418453444 |
| <i>1190005F20Rik</i> | 0,819965853 | 1,061379741 | 1,05113217  | 1,413818505 | 1,491153436 |
| <i>Rmi1</i>          | 0,925464084 | 1,135968356 | 1,11846104  | 1,413522801 | 1,585592874 |
| <i>Psmb4</i>         | 0,758496228 | 1,082902129 | 1,052470647 | 1,350022646 | 1,664858417 |
| <i>Fam63a</i>        | 0,898905672 | 1,099447412 | 1,119349399 | 1,292715944 | 1,442208705 |
| <i>Gmip</i>          | 0,836995978 | 1,084387882 | 1,06490673  | 1,243856393 | 1,479040385 |
| <i>Tmem208</i>       | 0,93224965  | 1,139587912 | 0,979013307 | 1,325144494 | 1,473849949 |
| <i>Pvrl4</i>         | 0,622257894 | 1,01704025  | 1,029404823 | 0,889914998 | 1,147097327 |
| <i>Kdm2b</i>         | 0,672013766 | 1,065603041 | 1,059444192 | 0,927048717 | 1,172348369 |
| <i>Ak3</i>           | 0,627055492 | 1,055092814 | 1,08914396  | 0,80305226  | 1,261097287 |
| <i>Fbxo9</i>         | 0,659655907 | 1,115072433 | 1,042556899 | 0,994080875 | 1,2062388   |
| <i>Cnih2</i>         | 0,606608351 | 1,139669479 | 1,002194024 | 0,962580713 | 1,241335043 |
| <i>Dem1</i>          | 0,572632847 | 1,16967152  | 1,03312378  | 1,012864654 | 1,314617139 |
| <i>Tgoln2</i>        | 0,59455427  | 1,145140417 | 1,181983971 | 0,984005523 | 1,288658985 |
| <i>Phb</i>           | 0,718964561 | 1,146914562 | 1,189448174 | 0,902178438 | 1,370466583 |
| <i>Phkg2</i>         | 0,644078896 | 1,027890583 | 1,167813891 | 0,894918134 | 1,37059966  |
| <i>Zfp382</i>        | 0,604104281 | 1,028463969 | 1,264349126 | 0,87119396  | 1,38562386  |
| <i>Rbm22</i>         | 0,674499385 | 0,90224329  | 1,223344891 | 1,000245716 | 1,24616398  |
| <i>4933430H15Rik</i> | 0,695050819 | 0,849967912 | 1,171714554 | 0,939518039 | 1,30526913  |
| <i>Ankrd52</i>       | 0,641435105 | 0,938362296 | 1,136056147 | 0,991312036 | 1,305883027 |
| <i>Plekha5</i>       | 0,621563165 | 0,896274782 | 1,181468666 | 1,019104626 | 1,283375758 |
| <i>Hsd11b1</i>       | 0,677685697 | 0,979926687 | 1,098908571 | 1,006941028 | 1,266217848 |
| <i>Tssc1</i>         | 0,700735148 | 1,033584158 | 1,165191397 | 0,997950273 | 1,316866652 |
| <i>Eif3i</i>         | 0,533184136 | 0,967540745 | 1,059497029 | 1,018087506 | 1,334663898 |

|                      |             |             |             |             |             |
|----------------------|-------------|-------------|-------------|-------------|-------------|
| <i>Hnrnpul1</i>      | 0,54184948  | 0,940484094 | 1,140502181 | 1,036773116 | 1,272951849 |
| <i>Gm7334</i>        | 0,582728641 | 0,975494031 | 1,088235103 | 0,895968156 | 1,288036254 |
| <i>Btg3</i>          | 0,581048952 | 0,971746944 | 1,086151478 | 0,895964735 | 1,288032672 |
| <i>Dpp4</i>          | 0,588348501 | 0,984535595 | 1,065786664 | 0,948191398 | 1,255914502 |
| <i>1190002N15Rik</i> | 0,572001556 | 1,003599769 | 1,134683571 | 0,920330477 | 1,256176534 |
| <i>Ppp3cc</i>        | 0,617485544 | 0,869845004 | 1,144762452 | 1,060147936 | 1,456827701 |
| <i>Josd1</i>         | 0,700265803 | 0,85949115  | 1,131011982 | 1,046071637 | 1,480073834 |
| <i>Actr10</i>        | 0,643231826 | 0,948800051 | 1,053446834 | 0,98482171  | 1,444790251 |
| <i>Ino80e</i>        | 0,658724379 | 0,93689715  | 1,208185058 | 1,084678269 | 1,395753652 |
| <i>Rab12</i>         | 0,578727328 | 0,966779327 | 1,184483814 | 1,007065567 | 1,396895077 |
| <i>Ttpal</i>         | 0,660928946 | 1,040868969 | 1,136263007 | 1,011560407 | 1,420611043 |
| <i>Fxyd1</i>         | 0,638255548 | 1,032442567 | 1,185884967 | 1,019134582 | 1,437946456 |
| <i>Znrf3</i>         | 0,73580159  | 0,994846325 | 1,068545703 | 1,053197072 | 1,161216272 |
| <i>Camta2</i>        | 0,759431199 | 0,993984532 | 1,069191779 | 1,097496711 | 1,200593035 |
| <i>Obfc2b</i>        | 0,780863111 | 0,987038055 | 1,086604911 | 1,071548014 | 1,119843094 |
| <i>Npepl1</i>        | 0,766180819 | 0,886806881 | 1,08204732  | 1,057382932 | 1,127298076 |
| <i>Pcbp4</i>         | 0,769224089 | 0,902162171 | 1,092411608 | 1,10023083  | 1,096239003 |
| <i>Lemd2</i>         | 0,754399294 | 0,926678574 | 1,041112027 | 1,066340398 | 1,244929831 |
| <i>Ppp4r1</i>        | 0,737286417 | 0,971198078 | 1,090555566 | 1,102594247 | 1,270689963 |
| <i>Sart3</i>         | 0,72376871  | 0,950234513 | 1,158725598 | 1,052230825 | 1,207235329 |
| <i>Glul</i>          | 0,823088087 | 0,887935537 | 1,048898058 | 0,998453904 | 1,178618273 |
| <i>Banp</i>          | 0,735253624 | 0,857726366 | 1,049663075 | 0,948383272 | 1,228058883 |
| <i>Lypd6b</i>        | 0,737568571 | 0,870293184 | 1,021340285 | 1,011222322 | 1,100281946 |
| <i>Ctdp1</i>         | 0,781976088 | 0,870629224 | 1,011882624 | 0,94289588  | 1,12591077  |
| <i>2010111101Rik</i> | 0,704584889 | 0,912117523 | 1,033902099 | 0,911461654 | 1,127393677 |
| <i>Senp6</i>         | 0,654977918 | 0,946380289 | 1,028759165 | 0,978659125 | 1,129537581 |
| <i>Adipor2</i>       | 0,710692028 | 0,895966728 | 0,98233396  | 0,950339943 | 1,189980712 |
| <i>Adap1</i>         | 0,690529274 | 0,938891834 | 1,003884458 | 0,937934655 | 1,186277696 |
| <i>4931414P19Rik</i> | 0,675350476 | 0,910941472 | 1,020434025 | 0,988506393 | 1,187624348 |
| <i>Spred3</i>        | 0,760729785 | 0,987680066 | 1,198947673 | 1,007737291 | 1,063229641 |
| <i>Snx6</i>          | 0,701716532 | 1,022770373 | 1,142524271 | 0,985060344 | 1,124221682 |
| <i>Zfp787</i>        | 0,733861683 | 0,959833393 | 1,275342343 | 1,009070197 | 1,154297803 |
| <i>LOC432562</i>     | 0,604784337 | 0,974755415 | 1,232868004 | 1,021178058 | 1,151062477 |
| <i>Nfkbib</i>        | 0,578591352 | 0,902396444 | 1,198234017 | 1,082871051 | 1,077975665 |
| <i>Rnf34</i>         | 0,741352182 | 1,027076109 | 1,13281543  | 0,96457379  | 1,227096417 |
| <i>Secisbp2</i>      | 0,716921481 | 1,016447418 | 1,153424326 | 0,867678098 | 1,260815317 |
| <i>E030011O05Rik</i> | 0,709494635 | 1,135599805 | 1,170685779 | 0,918712414 | 1,23426585  |
| <i>Rnd2</i>          | 0,812808756 | 1,178682113 | 1,130017989 | 0,844928988 | 1,215393524 |
| <i>Slc25a39</i>      | 0,915180751 | 1,115767704 | 1,093766813 | 0,881149792 | 1,283295206 |
| <i>Trappc6a</i>      | 0,893267486 | 1,043632386 | 1,090917149 | 0,828797653 | 1,307607223 |
| <i>Nup107</i>        | 0,933029913 | 1,0186677   | 1,043296031 | 0,870648012 | 1,234968169 |
| <i>Brd3</i>          | 0,886960205 | 0,955004221 | 1,226476462 | 0,821909644 | 1,246874657 |
| <i>Fzd7</i>          | 0,844072948 | 0,990801432 | 1,269759648 | 0,709024155 | 1,246783067 |
| <i>Denr</i>          | 0,754838337 | 0,928377975 | 1,225255761 | 0,831355273 | 1,168462959 |
| <i>Zfp707</i>        | 0,780530284 | 0,903521641 | 1,184810493 | 0,886198758 | 1,180716013 |
| <i>Dync2li1</i>      | 0,887597774 | 0,971477325 | 1,279712525 | 0,8937964   | 1,348059951 |
| <i>Galnt12</i>       | 0,925711268 | 1,103961926 | 1,359031637 | 0,89434493  | 1,294475778 |
| <i>Slc39a11</i>      | 0,89127049  | 1,037748739 | 1,218515212 | 0,877040276 | 1,19190392  |
| <i>Sipa1l2</i>       | 0,952871602 | 1,022542177 | 1,2701249   | 0,889621826 | 1,145807028 |
| <i>Rbck1</i>         | 0,640733283 | 0,851104388 | 1,429439057 | 1,060012472 | 1,466891747 |
| <i>Ankrd53</i>       | 0,645106201 | 0,934129674 | 1,368330695 | 1,022192653 | 1,440709854 |



|               |             |             |             |             |             |
|---------------|-------------|-------------|-------------|-------------|-------------|
| Zswim4        | 0,617112407 | 0,812941345 | 1,330963402 | 0,987491638 | 1,502956005 |
| Wdr89         | 0,578683105 | 0,862216083 | 1,332831541 | 1,008837172 | 1,465205605 |
| 1110001A16Rik | 0,574468457 | 0,83764533  | 1,285051508 | 1,034829018 | 1,404551646 |
| Ube2m         | 0,608464441 | 0,858924003 | 1,233912228 | 1,078080078 | 1,387432278 |
| Trpm1         | 0,63696068  | 0,906176256 | 1,317663419 | 1,076698097 | 1,549302348 |
| Ptges3        | 0,534200626 | 0,954415933 | 1,322212538 | 1,052371636 | 1,585294354 |
| Naa20         | 0,448737731 | 0,797440607 | 1,430311084 | 1,029803775 | 1,511663745 |
| Mrpl10        | 0,393072718 | 0,872707663 | 1,419157673 | 1,014104392 | 1,505217907 |
| Gatad2a       | 0,420670167 | 0,819809409 | 1,347917645 | 0,969288572 | 1,526671797 |
| Akt2          | 0,507347659 | 0,90905663  | 1,503767448 | 0,934011038 | 1,473296398 |
| Fzd9          | 0,76455255  | 0,944341796 | 1,294511376 | 0,926960765 | 1,429936388 |
| Mier2         | 0,761988088 | 0,889238259 | 1,252892971 | 0,894009865 | 1,4821442   |
| Gapdhs        | 0,78806196  | 0,894487363 | 1,367940068 | 0,909230233 | 1,466868366 |
| Lactbl1       | 0,748745463 | 1,017130962 | 1,320401134 | 0,786812974 | 1,415838918 |
| Tbc1d10b      | 0,686566004 | 0,850506731 | 1,3225232   | 0,898525546 | 1,616861228 |
| Calhm1        | 0,683744369 | 0,950563883 | 1,319442303 | 0,789919242 | 1,678797173 |
| Arpm1         | 0,716873279 | 0,751851954 | 1,388232334 | 0,977783325 | 1,361263411 |
| Rplp1         | 0,85603298  | 0,788011808 | 1,410808188 | 0,969829428 | 1,367930934 |
| Tmem129       | 0,7674342   | 0,750943667 | 1,212968354 | 0,859719848 | 1,410052733 |
| Dhrs11        | 0,770009298 | 0,779882791 | 1,268603343 | 0,869557731 | 1,296412132 |
| Cox6c         | 0,616480004 | 0,59478431  | 1,401854386 | 0,971634772 | 1,396104397 |
| Rarres2       | 0,797652279 | 1,011537333 | 1,488108887 | 1,104098975 | 1,478821217 |
| Jagn1         | 0,772667322 | 1,029814811 | 1,486178345 | 1,136481416 | 1,524404544 |
| Gm6034        | 0,716600373 | 1,048810255 | 1,454981598 | 1,107884449 | 1,475421564 |
| Zc3h10        | 0,798270698 | 1,037601903 | 1,51823923  | 1,122823995 | 1,420868898 |
| Mbd3          | 0,82626129  | 1,015692813 | 1,564381018 | 1,041931667 | 1,508214932 |
| Akap2         | 0,762452121 | 0,980802976 | 1,379139728 | 0,989477684 | 1,405362175 |
| Bicd2         | 0,785284809 | 1,035014843 | 1,376884261 | 1,059655551 | 1,360123998 |
| Supt5h        | 0,682780315 | 1,01235632  | 1,38897539  | 1,115459903 | 1,402007519 |
| Rilpl2        | 0,76734229  | 0,735666957 | 1,260470574 | 0,93476774  | 1,705425572 |
| 9330020H09Rik | 0,867132773 | 0,732642248 | 1,192316212 | 0,947999058 | 1,779164457 |
| 1810037117Rik | 0,714300768 | 0,717076966 | 1,348184263 | 0,902886282 | 1,931229222 |
| Mtap1s        | 0,746429925 | 0,959534214 | 1,23498692  | 1,017328174 | 1,820130557 |
| Efhd2         | 0,771469706 | 0,894202826 | 1,188291704 | 1,047249594 | 1,838488993 |
| Izumo4        | 0,875690243 | 0,829846792 | 1,310084424 | 1,112336454 | 1,834530904 |
| Ran           | 0,591082835 | 0,932136124 | 1,36392744  | 1,187308683 | 2,058876469 |
| Gadd45gip1    | 0,688251663 | 0,79604189  | 1,162859875 | 1,152044632 | 2,054008645 |
| Taf7          | 0,435908108 | 1,026445081 | 1,131685281 | 0,978201974 | 1,6109341   |
| Srp19         | 0,467055147 | 0,963192386 | 1,0863589   | 0,997912895 | 1,695550928 |
| Prmt1         | 0,526545071 | 0,863088302 | 1,211358482 | 0,966709285 | 1,623331432 |
| Mrpl32        | 0,301365632 | 0,846197956 | 1,334145608 | 0,922421448 | 1,676669402 |
| Gm13363       | 0,22365794  | 0,981536554 | 1,039373991 | 1,097077985 | 1,637380929 |
| Rpl9          | 0,265579489 | 0,937939947 | 0,982371327 | 1,111611725 | 1,692973743 |
| Art2a-ps      | 0,447187658 | 1,036512465 | 1,021639204 | 1,128133261 | 1,825819883 |
| Fam101a       | 0,622338581 | 0,950080174 | 1,031706243 | 0,892005958 | 1,581578627 |
| Kcnj8         | 0,630300278 | 1,00175513  | 1,08699094  | 0,80663213  | 1,694491365 |
| Cpsf1         | 0,583000732 | 0,805296034 | 0,95816955  | 0,782409639 | 1,614129597 |
| Fam111a       | 0,595530605 | 0,73283921  | 1,084704643 | 1,050017494 | 1,622178683 |
| Atp13a1       | 0,600574084 | 0,788221492 | 1,057935968 | 0,998732615 | 1,563115339 |
| Pou2f2        | 0,487373695 | 0,745405577 | 1,13376016  | 0,982146106 | 1,598097164 |
| Polr1c        | 0,509209349 | 0,735818734 | 1,083865255 | 0,934753325 | 1,559077706 |

|                      |             |             |             |             |             |
|----------------------|-------------|-------------|-------------|-------------|-------------|
| <i>H2-Q6</i>         | 0,544865401 | 0,53929227  | 0,709733236 | 1,188533437 | 1,946640283 |
| <i>H2-Q8</i>         | 0,53833518  | 0,531583391 | 0,685339843 | 1,185188226 | 1,935960319 |
| <i>Tssk5</i>         | 0,329110141 | 0,795986205 | 0,719288578 | 1,193518139 | 1,969132472 |
| <i>Gm15772</i>       | 0,575181995 | 0,666731731 | 0,978233248 | 1,276489736 | 1,959419404 |
| <i>Rpl26</i>         | 0,565740851 | 0,65352779  | 0,966324117 | 1,247787447 | 1,966126278 |
| <i>Slc16a11</i>      | 0,484359243 | 0,75397034  | 1,020774252 | 1,002476327 | 1,931321373 |
| <i>Rps28</i>         | 0,581643508 | 1,10256985  | 0,743424857 | 0,96196052  | 1,853647523 |
| <i>Tssk3</i>         | 0,735918099 | 0,883871435 | 0,859014605 | 0,996091996 | 1,804941771 |
| <i>Srm</i>           | 0,917962303 | 0,75706222  | 1,224725038 | 0,745651673 | 2,00320581  |
| <i>Icam1</i>         | 0,66075766  | 0,781106061 | 1,344172235 | 0,57665447  | 1,828708862 |
| <i>Smpd1</i>         | 0,722797763 | 0,335029141 | 1,314940149 | 0,755230511 | 1,886647376 |
| <i>BC029722</i>      | 0,891966195 | 0,534557303 | 0,798413141 | 0,549746031 | 1,717609896 |
| <i>9930021D14Rik</i> | 0,912380345 | 0,658722926 | 0,938503319 | 0,590436102 | 1,975235586 |
| <i>Tcf19</i>         | 1,233408136 | 0,720846737 | 1,352639285 | 1,116288498 | 1,570158623 |
| <i>Zfx3</i>          | 1,158036677 | 0,884150287 | 1,595030731 | 0,971539294 | 1,611920951 |
| <i>Frat2</i>         | 1,03691206  | 0,68001392  | 1,620410095 | 0,698533886 | 1,701314205 |
| <i>Tmem115</i>       | 1,01673835  | 0,929271923 | 1,551702991 | 1,073580896 | 1,863073747 |
| <i>Phpt1</i>         | 1,15723453  | 0,963092556 | 1,621881131 | 1,080663432 | 1,950916993 |
| <i>1110065P20Rik</i> | 1,184806504 | 0,825870718 | 1,470822836 | 1,150391074 | 1,984587303 |
| <i>Inf2</i>          | 0,972639298 | 0,824483225 | 1,630534963 | 1,217581927 | 1,970838967 |
| <i>Racgap1</i>       | 1,038118529 | 0,722229997 | 1,382139057 | 1,130838656 | 1,819875506 |
| <i>Dnajc9</i>        | 1,046600148 | 0,695793328 | 1,483123388 | 1,147772274 | 1,964816759 |
| <i>Banf1</i>         | 1,291853091 | 1,018796186 | 1,341962292 | 0,784363494 | 1,963628225 |
| <i>Amh</i>           | 1,257743687 | 1,040865052 | 1,317689915 | 0,99255169  | 2,128586257 |
| <i>Dok1</i>          | 1,307568788 | 0,608365057 | 1,201775128 | 0,760268381 | 2,204943987 |
| <i>A330069E16Rik</i> | 0,455883004 | 1,23850332  | 0,258374856 | 0,725717689 | 1,967928958 |
| <i>2700023E23Rik</i> | 0,461969677 | 1,146770183 | 0,46997399  | 1,269061343 | 2,304557076 |
| <i>Rangrf</i>        | 2,191999066 | 0,385935565 | 0,946787574 | 0,962874564 | 2,188750761 |
| <i>Slurp1</i>        | 2,121403544 | 1,050261706 | 1,500455083 | 0,635747353 | 2,134297604 |
| <i>Slc9a1</i>        | 1,384085438 | 1,501634082 | 1,68926234  | 1,484287102 | 1,772892714 |
| <i>Igf2r</i>         | 1,334218237 | 1,46082613  | 1,72917747  | 1,531744783 | 1,762410081 |
| <i>Ankrd13b</i>      | 1,386664618 | 1,421898641 | 1,653841244 | 1,533510927 | 1,802945818 |
| <i>Cnot8</i>         | 1,305494966 | 1,421413587 | 1,671580171 | 1,43601271  | 1,737680646 |
| <i>0610038L08Rik</i> | 1,341244086 | 1,575784441 | 1,625666076 | 1,458194985 | 1,857753247 |
| <i>Zbp1</i>          | 1,328715389 | 1,539455599 | 1,661809586 | 1,353373211 | 1,798074063 |
| <i>Msi2</i>          | 1,320359302 | 1,537115135 | 1,619666862 | 1,524756682 | 1,591037738 |
| <i>Jup</i>           | 1,357871112 | 1,473125052 | 1,598360323 | 1,452718076 | 1,561136623 |
| <i>Ube4b</i>         | 1,333839413 | 1,61901327  | 1,598642245 | 1,452313522 | 1,600366062 |
| <i>Zfp629</i>        | 1,355833198 | 1,560950605 | 1,651180019 | 1,383135138 | 1,58195705  |
| <i>Rnf44</i>         | 1,187208342 | 1,564211832 | 1,798711313 | 1,471594151 | 1,815138493 |
| <i>Tbl1xr1</i>       | 1,175160291 | 1,524439758 | 1,818912921 | 1,503338508 | 1,846455679 |
| <i>Larp1</i>         | 1,115483165 | 1,467909629 | 1,82700788  | 1,439431497 | 1,84262285  |
| <i>Anxa11</i>        | 1,120061472 | 1,476303748 | 1,914680897 | 1,458657146 | 1,70829965  |
| <i>Wrap53</i>        | 1,140563737 | 1,496984404 | 1,846212638 | 1,529176446 | 1,610415348 |
| <i>Cnot6</i>         | 1,097956051 | 1,469562469 | 1,744903728 | 1,532803012 | 1,629295712 |
| <i>BC005764</i>      | 1,503982982 | 1,518299068 | 1,764299745 | 1,750409243 | 1,851978251 |
| <i>Mdp1</i>          | 1,514854921 | 1,53508207  | 1,766891238 | 1,780724979 | 1,896459442 |
| <i>Cdk3-ps</i>       | 1,446315656 | 1,5021178   | 1,713366746 | 1,694817027 | 1,78200766  |
| <i>B230217O12Rik</i> | 1,472619962 | 1,635536539 | 1,862884569 | 1,685411087 | 1,820123667 |
| <i>Thra</i>          | 1,541274708 | 1,549207731 | 1,884997907 | 1,648122341 | 1,870534146 |
| <i>Elf4</i>          | 1,36055276  | 1,505116964 | 1,819790209 | 1,560056112 | 1,806542353 |

|                      |             |             |             |             |             |
|----------------------|-------------|-------------|-------------|-------------|-------------|
| <i>Ints5</i>         | 1,389405585 | 1,47538192  | 1,910246466 | 1,68176955  | 1,667585301 |
| <i>Edf1</i>          | 1,373958481 | 1,60665737  | 1,729031699 | 1,856958984 | 1,700379178 |
| <i>Rela</i>          | 1,330678133 | 1,719648425 | 1,722079    | 1,726679381 | 1,693328046 |
| <i>Phb2</i>          | 1,491949969 | 1,628510733 | 1,847365599 | 1,747315531 | 1,608125419 |
| <i>Mta1</i>          | 1,32668366  | 1,350535355 | 1,584221806 | 1,633952567 | 1,762762416 |
| <i>Mif4gd</i>        | 1,294126703 | 1,473211258 | 1,571775391 | 1,640952096 | 1,747062067 |
| <i>Parp10</i>        | 1,20446373  | 1,407657969 | 1,61916479  | 1,633302296 | 1,798692088 |
| <i>Dazap1</i>        | 1,206347821 | 1,404229247 | 1,543666822 | 1,554135836 | 1,836886749 |
| <i>4930471I20Rik</i> | 1,222932363 | 1,47990712  | 1,550945682 | 1,578507719 | 1,633301311 |
| <i>Camkk2</i>        | 1,200718401 | 1,535864391 | 1,576206307 | 1,537520607 | 1,692616853 |
| <i>1110005A03Rik</i> | 1,208050811 | 1,280780467 | 1,528638074 | 1,625969263 | 1,774603826 |
| <i>Leng1</i>         | 1,234383202 | 1,298551248 | 1,547629841 | 1,691088539 | 1,644018162 |
| <i>Git1</i>          | 1,273541399 | 1,437666626 | 1,571282177 | 1,614441436 | 1,943454137 |
| <i>5830416I19Rik</i> | 1,309728928 | 1,454098611 | 1,48857396  | 1,623790021 | 1,958206158 |
| <i>Ppil1</i>         | 1,310969726 | 1,589210927 | 1,580618611 | 1,684985615 | 1,880915251 |
| <i>Cyp2t4</i>        | 1,155902029 | 1,487669784 | 1,492735824 | 1,80422365  | 1,943222139 |
| <i>Tspo</i>          | 1,187014764 | 1,380268098 | 1,490218955 | 1,747811682 | 1,822764265 |
| <i>Rnf125</i>        | 1,286230641 | 1,387465119 | 1,726554286 | 1,670455475 | 1,980038842 |
| <i>Hint2</i>         | 1,398068713 | 1,361581607 | 1,790617197 | 1,693559187 | 1,830341106 |
| <i>Slc35c1</i>       | 1,447126923 | 1,35960089  | 1,59181933  | 1,667678243 | 1,86970989  |
| <i>Egln1</i>         | 1,449348842 | 1,42140734  | 1,686964994 | 1,611662846 | 1,875515148 |
| <i>4930483J18Rik</i> | 1,246613625 | 1,361202723 | 1,647013916 | 1,82112963  | 1,857646558 |
| <i>Hmgn2</i>         | 1,212243746 | 1,248569314 | 1,621428355 | 1,763699715 | 1,79020193  |
| <i>Amd1</i>          | 1,153907919 | 1,320171542 | 1,738324523 | 1,649151975 | 1,77951777  |
| <i>Amd2</i>          | 1,153909069 | 1,32017658  | 1,737866866 | 1,651273674 | 1,779522831 |
| <i>Sirt7</i>         | 1,157132591 | 1,339401025 | 1,760706746 | 1,730473098 | 1,837413628 |
| <i>Cd79b</i>         | 1,437795286 | 1,155671775 | 1,685875029 | 1,723243382 | 1,887343711 |
| <i>Rnasek</i>        | 1,451138237 | 1,189012529 | 1,791364909 | 1,519328287 | 1,751342747 |
| <i>Pdxp</i>          | 1,571857996 | 1,31981566  | 1,877790687 | 1,885744376 | 1,714759765 |
| <i>Cops6</i>         | 1,614415768 | 1,268762959 | 1,843336579 | 1,713264226 | 1,732258143 |
| <i>Sema4f</i>        | 1,500813254 | 1,471050922 | 1,423049143 | 1,60614581  | 1,585384598 |
| <i>Phldb3</i>        | 1,468441122 | 1,55726884  | 1,47341992  | 1,653749658 | 1,491935553 |
| <i>BC032203</i>      | 1,66606388  | 1,622620309 | 1,480252023 | 1,608287872 | 1,524676053 |
| <i>Exog</i>          | 1,570643453 | 1,687817342 | 1,455724704 | 1,600962845 | 1,319616466 |
| <i>Smpd13b</i>       | 1,487153758 | 1,680194065 | 1,477129501 | 1,754719128 | 1,441175902 |
| <i>AW046200</i>      | 1,295112264 | 1,710333038 | 1,511027708 | 1,47924701  | 1,509786611 |
| <i>Galnt7</i>        | 1,298196388 | 1,577703901 | 1,48170184  | 1,53916173  | 1,512710684 |
| <i>Galm</i>          | 1,432808156 | 1,682631837 | 1,59662486  | 1,5852215   | 1,367811905 |
| <i>Prdm1</i>         | 1,409932995 | 1,633775693 | 1,626473046 | 1,500262531 | 1,334553879 |
| <i>Sag</i>           | 1,244453175 | 1,419703723 | 1,562326004 | 1,569701343 | 1,534863023 |
| <i>Hspa2</i>         | 1,22521472  | 1,398892369 | 1,641425418 | 1,737769892 | 1,603160157 |
| <i>Dok2</i>          | 1,069974201 | 1,542359516 | 1,52051168  | 1,697534111 | 1,501686372 |
| <i>1700020I14Rik</i> | 1,158888123 | 1,520363664 | 1,638340821 | 1,494260481 | 1,334262058 |
| <i>1810013A23Rik</i> | 1,207634477 | 1,407581115 | 1,755303268 | 1,674403513 | 1,304772979 |
| <i>Ccr5</i>          | 1,381401607 | 1,705620627 | 1,32322132  | 1,99472861  | 1,431908727 |
| <i>Prkcsh</i>        | 1,373191497 | 1,74263015  | 1,489579239 | 2,078690538 | 1,534492262 |
| <i>Bpgm</i>          | 1,197956528 | 1,829223839 | 1,564011135 | 1,97086955  | 1,481469252 |
| <i>2310016M24Rik</i> | 1,053129176 | 1,352880686 | 1,524620751 | 2,126451752 | 1,435163175 |
| <i>Gm17801</i>       | 1,211186502 | 1,432254715 | 1,43994228  | 2,080932673 | 1,453502496 |
| <i>Sepp1</i>         | 1,16000427  | 1,219162562 | 1,397699298 | 1,915671193 | 1,450191661 |
| <i>Tymp</i>          | 1,293914433 | 1,279648046 | 1,270049927 | 1,771804215 | 2,088047318 |

|                      |             |             |             |             |             |
|----------------------|-------------|-------------|-------------|-------------|-------------|
| <i>E130012A19Rik</i> | 1,317835739 | 1,477051732 | 1,351591867 | 1,925949254 | 1,952490785 |
| <i>Fkrp</i>          | 1,173971301 | 1,368415959 | 1,656924707 | 2,014119726 | 2,156022552 |
| <i>B4galt5</i>       | 1,18750248  | 1,475697827 | 1,609127257 | 1,874042459 | 2,078106702 |
| <i>Sap18</i>         | 1,182352779 | 1,310819689 | 1,542859942 | 1,994133538 | 1,933489709 |
| <i>F2rl3</i>         | 1,504833153 | 1,639983434 | 1,347796468 | 2,109229993 | 1,974605407 |
| <i>Nkx2-4</i>        | 1,267015445 | 1,757025094 | 1,249112045 | 2,152028424 | 2,172728407 |
| <i>Mrps26</i>        | 1,147757427 | 1,734512352 | 1,3714324   | 1,765225107 | 1,820169305 |
| <i>Polg</i>          | 1,22816248  | 1,732213731 | 1,427696359 | 1,631928108 | 1,69568665  |
| <i>Eid2b</i>         | 1,295323078 | 1,64853381  | 1,260056929 | 1,666651211 | 1,805811925 |
| <i>Rps9</i>          | 0,99344335  | 1,593977281 | 1,43979461  | 1,629344975 | 1,736238246 |
| <i>Abhd1</i>         | 1,051263283 | 1,489385435 | 1,443833565 | 1,599360803 | 1,735563316 |
| <i>Ulk3</i>          | 1,098345317 | 1,609576817 | 1,378206662 | 1,705480092 | 1,654438228 |
| <i>Apobec2</i>       | 1,251777729 | 1,390214907 | 1,263371547 | 1,622549018 | 1,774240388 |
| <i>BC020402</i>      | 1,202450696 | 1,386695413 | 1,246817748 | 1,495886243 | 1,789196746 |
| <i>Alkbh7</i>        | 1,291755671 | 1,483561439 | 1,222673419 | 1,536106149 | 1,945451505 |
| <i>Lin7b</i>         | 1,057915354 | 1,493220877 | 1,153127678 | 1,594404582 | 1,940154363 |
| <i>Pnpla2</i>        | 1,076427072 | 1,485992149 | 1,188065649 | 1,672693537 | 1,957933882 |
| <i>Lpcat4</i>        | 1,002290075 | 1,722722928 | 1,219341355 | 1,833250958 | 2,0163713   |
| <i>2810008D09Rik</i> | 1,113325638 | 0,807744065 | 1,426929083 | 1,541122732 | 1,994683159 |
| <i>Slc39a4</i>       | 1,088577454 | 0,78160633  | 1,655568243 | 1,487792689 | 2,057865353 |
| <i>Clic3</i>         | 0,865156752 | 0,680251699 | 1,430064231 | 1,536747069 | 2,137383824 |
| <i>Vkorc1</i>        | 0,946881301 | 0,924077623 | 1,574391659 | 1,533813645 | 1,983483579 |
| <i>Rcn3</i>          | 0,99395142  | 0,886906221 | 1,542042379 | 1,60323681  | 1,85012743  |
| <i>Yrdc</i>          | 0,815524554 | 0,917394219 | 1,532100145 | 1,521869531 | 1,867601144 |
| <i>Stk38</i>         | 1,016253353 | 1,146972152 | 1,427334594 | 1,721247551 | 1,935686269 |
| <i>Susd3</i>         | 0,983736007 | 1,142000455 | 1,542020258 | 1,67670356  | 1,999494794 |
| <i>Rpl8</i>          | 0,981615161 | 1,11914341  | 1,651366208 | 1,881847823 | 2,029247436 |
| <i>Phf1</i>          | 1,112796749 | 0,935809276 | 1,627371842 | 1,679302159 | 1,92992937  |
| <i>Fcgrt</i>         | 1,138650485 | 1,062812697 | 1,593639813 | 1,659214855 | 2,109224955 |
| <i>H2-DMa</i>        | 1,441736206 | 0,915744512 | 1,668808837 | 1,492949752 | 2,162776259 |
| <i>Aurkaip1</i>      | 1,333731824 | 0,946306232 | 1,416887249 | 1,747906558 | 2,116798348 |
| <i>Ncln</i>          | 1,150645291 | 0,960138269 | 1,381943788 | 1,957886967 | 2,383732142 |
| <i>H2-K2</i>         | 1,032542887 | 1,154930441 | 1,142296642 | 1,739821679 | 2,370323309 |
| <i>1700029J11Rik</i> | 1,178850222 | 1,065539943 | 1,454129044 | 1,503294286 | 1,577553387 |
| <i>Ifitm5</i>        | 1,031178009 | 1,094413972 | 1,425256027 | 1,588831389 | 1,486999461 |
| <i>Phf13</i>         | 1,079126329 | 1,062825059 | 1,624664751 | 1,47989028  | 1,626760162 |
| <i>D330041H03Rik</i> | 0,995450821 | 1,012430233 | 1,417902818 | 1,495025536 | 1,826011028 |
| <i>Manf</i>          | 0,966320859 | 1,040537407 | 1,382709265 | 1,537228809 | 1,729539886 |
| <i>Pmel</i>          | 1,017500046 | 1,154678715 | 1,421055191 | 1,639649859 | 1,77900591  |
| <i>Hyi</i>           | 1,151896395 | 0,991662414 | 1,583067874 | 1,346197405 | 1,638722686 |
| <i>P2rx4</i>         | 1,142906322 | 1,047706341 | 1,454939436 | 1,280891389 | 1,687215546 |
| <i>9130023H24Rik</i> | 1,157965054 | 0,834696673 | 1,285266607 | 1,753787592 | 1,686237937 |
| <i>Nudt16l1</i>      | 0,78097133  | 0,875282339 | 1,206301278 | 1,267727465 | 1,825808775 |
| <i>Fth1</i>          | 0,724930159 | 0,945619489 | 1,200154271 | 1,403899237 | 1,728170101 |
| <i>Pdap1</i>         | 0,709947858 | 0,831852748 | 1,38310793  | 1,451252289 | 1,885295901 |
| <i>Lrrc47</i>        | 0,878266818 | 0,719603114 | 1,25823757  | 1,373131964 | 1,769939335 |
| <i>Wdr38</i>         | 0,885127421 | 0,871305766 | 1,252754834 | 1,442849198 | 1,725111826 |
| <i>Klhl21</i>        | 0,992609321 | 0,907181501 | 1,299203686 | 1,33125818  | 1,893254351 |
| <i>Rras</i>          | 0,896584812 | 0,883392076 | 1,306695281 | 1,426008004 | 1,990112108 |
| <i>1500012F01Rik</i> | 0,894701998 | 0,965933415 | 1,340071724 | 1,439653653 | 1,749606329 |
| <i>Traf3ip2</i>      | 0,911801094 | 1,040599779 | 1,311551285 | 1,423113465 | 1,660918551 |

|                      |             |             |             |             |             |
|----------------------|-------------|-------------|-------------|-------------|-------------|
| <i>Mllt11</i>        | 0,804858093 | 0,993118433 | 1,402622431 | 1,389058729 | 1,649212584 |
| <i>Tnfsf13</i>       | 0,901933739 | 1,00031542  | 1,419021226 | 1,438881328 | 1,624553987 |
| <i>Med10</i>         | 0,955039742 | 0,970442201 | 1,405112649 | 1,327911104 | 1,700215068 |
| <i>Tubb4b</i>        | 0,838544294 | 0,900176427 | 1,392236224 | 1,550130543 | 1,661262544 |
| <i>Bag5</i>          | 0,982459652 | 1,156214111 | 1,185735415 | 1,597002113 | 1,739575484 |
| <i>Nrm</i>           | 1,086077243 | 1,193284657 | 1,13339974  | 1,597042008 | 1,786854087 |
| <i>Susd2</i>         | 1,065111351 | 1,172414887 | 1,262306776 | 1,624669062 | 1,871277776 |
| <i>Pusl1</i>         | 1,186482184 | 1,230725877 | 1,235237085 | 1,740695051 | 1,737498394 |
| <i>Tmem14c</i>       | 1,091763013 | 1,253295988 | 1,270509316 | 1,458330682 | 1,77570934  |
| <i>Nfic</i>          | 1,225710777 | 1,191189964 | 1,371070766 | 1,481593514 | 1,760046242 |
| <i>Thap7</i>         | 1,144800715 | 1,192380118 | 1,377124977 | 1,437751373 | 2,002215371 |
| <i>Grin3b</i>        | 1,10062798  | 0,963038188 | 1,235119356 | 1,476137697 | 2,00387595  |
| <i>H2-T23</i>        | 1,097266986 | 1,063356631 | 1,065495772 | 1,578821484 | 1,988106499 |
| <i>Xrcc3</i>         | 1,362266407 | 1,549642933 | 1,792128446 | 1,598452954 | 2,048400901 |
| <i>Iqgap1</i>        | 1,357360465 | 1,528447872 | 1,83809879  | 1,619490925 | 2,088286396 |
| <i>Gm16576</i>       | 1,385628118 | 1,511495347 | 1,899423523 | 1,636076707 | 1,951047296 |
| <i>Uqcr10</i>        | 1,3169762   | 1,603609677 | 1,829624632 | 1,605901758 | 1,990970081 |
| <i>Ccdc6</i>         | 1,255222538 | 1,605514621 | 1,858880415 | 1,569966769 | 1,97044815  |
| <i>Amac1</i>         | 1,238972199 | 1,615265322 | 1,741988355 | 1,534681793 | 1,944124583 |
| <i>Txnrd1</i>        | 1,297011756 | 1,777195251 | 1,928513078 | 1,687738656 | 1,957989632 |
| <i>Heg1</i>          | 1,287686427 | 1,747577121 | 1,900091814 | 1,734440799 | 1,879253634 |
| <i>Stard3</i>        | 1,233253961 | 1,673086754 | 1,912485758 | 1,697156546 | 1,957820912 |
| <i>Vps45</i>         | 1,268088209 | 1,802369464 | 1,854610067 | 1,57939449  | 2,018798369 |
| <i>Sirt6</i>         | 1,247520051 | 1,549778504 | 1,986386105 | 1,649892894 | 2,112904835 |
| <i>Ncor2</i>         | 1,233577134 | 1,514158241 | 1,911103325 | 1,693674272 | 2,175126439 |
| <i>Amica1</i>        | 1,358586603 | 1,454562067 | 1,99354646  | 1,621574282 | 2,08796773  |
| <i>Spata2</i>        | 1,221747479 | 1,46419842  | 1,860867504 | 1,749582213 | 2,055496945 |
| <i>Zfp217</i>        | 1,226537021 | 1,536355384 | 1,913361613 | 1,808613052 | 2,147096542 |
| <i>Tlr6</i>          | 1,243468863 | 1,534008169 | 1,939005154 | 1,797685023 | 1,969782652 |
| <i>Phf15</i>         | 0,97323736  | 1,513342905 | 1,972495224 | 1,511043546 | 2,192605105 |
| <i>Tnfrsf1b</i>      | 1,110385036 | 1,589628223 | 2,058061044 | 1,547750337 | 2,107298727 |
| <i>AI504432</i>      | 1,04819797  | 1,460418718 | 2,042792057 | 1,463276514 | 1,955798388 |
| <i>Rpl18a</i>        | 1,205406217 | 1,363072215 | 1,614433554 | 1,326242211 | 1,971845191 |
| <i>Unkl</i>          | 1,161738764 | 1,432998615 | 1,767819945 | 1,203584699 | 1,99346561  |
| <i>Agpat3</i>        | 1,104602252 | 1,416428212 | 1,798165636 | 1,447641716 | 2,028485466 |
| <i>Ptpn22</i>        | 1,291915838 | 1,504373509 | 1,72821638  | 1,398889157 | 2,016304523 |
| <i>Gimap5</i>        | 1,296077619 | 1,450014289 | 1,6580036   | 1,315396776 | 1,986313939 |
| <i>Matk</i>          | 1,339281299 | 1,504281208 | 1,567326659 | 1,411074296 | 1,966690245 |
| <i>Nup62</i>         | 1,389524226 | 1,457023355 | 1,762653579 | 1,50122756  | 2,081876743 |
| <i>Exoc8</i>         | 1,333462913 | 1,486037573 | 1,685679173 | 1,518952379 | 2,02284339  |
| <i>Akt1</i>          | 1,148626981 | 1,368989978 | 1,605512001 | 1,567709131 | 2,01903718  |
| <i>Zfp335</i>        | 1,185255032 | 1,329587078 | 1,624286472 | 1,500378865 | 2,043685464 |
| <i>Mmp23</i>         | 1,242845019 | 1,226046114 | 1,608365355 | 1,597581465 | 1,96703337  |
| <i>Fam96b</i>        | 1,11364948  | 1,32626028  | 1,644974808 | 1,578987086 | 1,934896539 |
| <i>Psma7</i>         | 1,125003643 | 1,334090721 | 1,706132166 | 1,692144227 | 2,011593895 |
| <i>Fbrs</i>          | 1,123764549 | 1,262042874 | 1,8627781   | 1,521106536 | 1,926458653 |
| <i>Slc37a1</i>       | 1,235306545 | 1,233533665 | 1,760282863 | 1,506920227 | 1,823930903 |
| <i>Nenf</i>          | 1,417571348 | 1,211500324 | 1,817628475 | 1,421636981 | 1,974097407 |
| <i>Ccne1</i>         | 1,496529318 | 1,195076062 | 1,914366937 | 1,509747445 | 2,104660262 |
| <i>Tesk1</i>         | 1,325699048 | 1,269056786 | 1,753936716 | 1,452008912 | 2,148353923 |
| <i>1500011B03Rik</i> | 1,274823755 | 1,463272015 | 1,638194486 | 1,799656695 | 2,236917285 |

|                      |             |             |             |             |             |
|----------------------|-------------|-------------|-------------|-------------|-------------|
| <i>Srgn</i>          | 1,279165166 | 1,326814515 | 1,674358746 | 1,672043249 | 2,269811046 |
| <i>Rps25</i>         | 1,099734841 | 1,496906421 | 1,788591764 | 1,790567281 | 2,48537253  |
| <i>Rfx1</i>          | 1,126696889 | 1,447839014 | 1,839487285 | 1,856132054 | 2,271248254 |
| <i>Rtn4rl1</i>       | 1,096963296 | 1,527896546 | 1,845477214 | 1,844434661 | 2,194602548 |
| <i>Jak3</i>          | 1,012784419 | 1,475432223 | 1,957527945 | 1,864809114 | 2,3295827   |
| <i>Hnrnp3</i>        | 1,054137091 | 1,502509392 | 1,828730644 | 1,911576819 | 2,081561198 |
| <i>Rpl23</i>         | 0,980840235 | 1,48762144  | 1,769036405 | 1,93147345  | 2,148995337 |
| <i>1810058I24Rik</i> | 0,971503915 | 1,46240373  | 1,734884723 | 1,581903893 | 2,25215014  |
| <i>Esyt1</i>         | 1,076666256 | 1,423157348 | 1,596093932 | 1,727114641 | 2,229967396 |
| <i>C030018K13Rik</i> | 1,00083481  | 1,263123784 | 1,557674774 | 1,591947799 | 2,169857544 |
| <i>Sh3bp5</i>        | 1,010982509 | 1,385456467 | 1,770554432 | 1,755090651 | 2,259770407 |
| <i>Prdx6</i>         | 0,996207222 | 1,380075472 | 1,74359164  | 1,902702299 | 2,257574308 |
| <i>Rps18</i>         | 0,905329942 | 1,355788762 | 1,617525023 | 1,82116528  | 2,212534342 |
| <i>Tlcd1</i>         | 1,516121109 | 1,315964254 | 1,756723971 | 1,708619909 | 2,302258786 |
| <i>Cdt1</i>          | 1,598386312 | 1,36079992  | 1,672892411 | 1,537431297 | 2,251022599 |
| <i>Flot1</i>         | 1,66716624  | 1,424119345 | 1,714976432 | 1,71208146  | 2,145269431 |
| <i>Mafk</i>          | 1,611253122 | 1,505068584 | 1,828490392 | 1,667796024 | 2,122491359 |
| <i>Efemp2</i>        | 1,526205441 | 1,631952718 | 1,790628775 | 1,638757672 | 2,431374939 |
| <i>Ndufb10</i>       | 1,433430173 | 1,643088328 | 1,72345139  | 1,585346314 | 2,325851084 |
| <i>Atp5d</i>         | 1,513970465 | 1,61054458  | 1,552498932 | 1,583283959 | 2,457766975 |
| <i>Ttc7</i>          | 1,459859636 | 1,59163604  | 1,827974178 | 1,740321376 | 2,160703853 |
| <i>Ndufv3</i>        | 1,519413377 | 1,602728521 | 1,746497897 | 1,82444793  | 2,305595774 |
| <i>4930579G18Rik</i> | 1,30157892  | 1,624228404 | 1,711776127 | 1,832966353 | 2,162351825 |
| <i>Tnfaip811</i>     | 1,464376978 | 1,469791608 | 1,803306525 | 1,85560622  | 2,185387766 |
| <i>Stard5</i>        | 1,469644433 | 1,508759731 | 1,742254562 | 1,800242859 | 2,247876828 |
| <i>Gm14378</i>       | 1,443902187 | 1,367808545 | 1,715343138 | 1,825827096 | 2,249453063 |
| <i>Klhl17</i>        | 1,360158683 | 1,493143458 | 2,077570818 | 1,809982003 | 2,376201348 |
| <i>Rbm15</i>         | 1,344711607 | 1,51493728  | 1,949543879 | 1,810140986 | 2,402909502 |
| <i>Rpl29</i>         | 1,325562546 | 1,667065857 | 2,004207789 | 1,713675487 | 2,326066082 |
| <i>Irf3</i>          | 1,327912734 | 1,471699752 | 2,023913388 | 1,905397501 | 2,227628851 |
| <i>Utp3</i>          | 1,506357592 | 1,587799712 | 2,031996399 | 1,899882704 | 2,189732332 |
| <i>Cst7</i>          | 1,092423476 | 1,27963007  | 1,97471431  | 1,478184812 | 2,179730801 |
| <i>Zyx</i>           | 1,224576481 | 1,344467056 | 2,04117988  | 1,548175582 | 2,268546485 |
| <i>Mst1</i>          | 1,063148801 | 1,228064208 | 1,993954073 | 1,721477314 | 2,29219277  |
| <i>Cdk9</i>          | 1,139313175 | 1,409746921 | 2,012390038 | 1,658907793 | 2,174921496 |
| <i>Trp53i13</i>      | 1,070668272 | 1,44028093  | 1,938630248 | 1,63810342  | 2,10884043  |
| <i>Exosc4</i>        | 1,087023181 | 1,489117172 | 2,004685628 | 1,779007395 | 2,15763479  |
| <i>Hnrnpab</i>       | 1,073385202 | 1,528721328 | 2,065024458 | 1,642285819 | 2,258187286 |
| <i>Nfyb</i>          | 0,964948687 | 1,430638429 | 2,094291948 | 1,679842929 | 2,216035723 |
| <i>Cnr2</i>          | 0,973418867 | 1,444095785 | 1,858264255 | 1,514667844 | 2,484857085 |
| <i>Sec11c</i>        | 0,918030002 | 1,458172282 | 1,821490495 | 1,372793044 | 2,248867056 |
| <i>Unc119</i>        | 1,248741447 | 1,436101222 | 1,921919802 | 1,465543755 | 2,394297294 |
| <i>Mta3</i>          | 1,232553896 | 1,487479792 | 2,031511223 | 1,432723013 | 2,431053943 |
| <i>Bet1l</i>         | 1,251537411 | 1,179625672 | 1,949361165 | 1,473715262 | 2,422288754 |
| <i>Tbkbp1</i>        | 1,401316024 | 1,386600096 | 1,980475061 | 1,657327593 | 2,283005344 |
| <i>C1qtnf6</i>       | 1,36406764  | 1,454698388 | 2,027066009 | 1,426753079 | 2,188519314 |
| <i>Lgals3bp</i>      | 1,183149139 | 1,454527505 | 2,142673829 | 1,698672475 | 2,368375414 |
| <i>Apobec3</i>       | 1,145444292 | 1,545142109 | 2,055987721 | 1,667367181 | 2,451452563 |
| <i>Dom3z</i>         | 1,115722826 | 1,568128509 | 2,236662693 | 1,702883673 | 2,380661851 |
| <i>Apom</i>          | 0,988632643 | 1,631107978 | 2,058450553 | 1,622779379 | 2,440051479 |
| <i>Med16</i>         | 0,932793303 | 1,215769647 | 2,18377274  | 1,378513838 | 2,50067417  |

|                      |             |             |             |             |             |
|----------------------|-------------|-------------|-------------|-------------|-------------|
| <i>Rps12</i>         | 0,804669715 | 1,219668442 | 2,076094845 | 1,537888864 | 2,542969695 |
| <i>O910001L09Rik</i> | 0,997782187 | 1,236080723 | 2,250136537 | 1,609619528 | 2,597271154 |
| <i>5830432E09Rik</i> | 1,424695697 | 1,367906211 | 1,899627697 | 0,773392931 | 1,944184345 |
| <i>Tnni3</i>         | 1,229665966 | 1,187096676 | 1,995212539 | 1,131149236 | 1,964219856 |
| <i>Sox12</i>         | 0,97165343  | 1,668175396 | 1,823674714 | 0,957496023 | 2,072483144 |
| <i>Fgf17</i>         | 0,990588353 | 1,313172731 | 1,881028725 | 0,749703944 | 2,096030583 |
| <i>Lcat</i>          | 1,572289727 | 1,42041243  | 1,807298944 | 1,076135258 | 2,183174091 |
| <i>Fbxw5</i>         | 1,396290337 | 1,659881037 | 1,795446226 | 1,270982425 | 2,370830139 |
| <i>Ehd1</i>          | 1,498167107 | 1,096973956 | 2,225075077 | 1,080891532 | 2,450789721 |
| <i>Snai3</i>         | 1,524448093 | 0,918335    | 2,212562923 | 1,003441554 | 2,031346982 |
| <i>Frs2</i>          | 1,506874215 | 1,767290831 | 1,715043943 | 1,625682209 | 1,730517801 |
| <i>Rnf41</i>         | 1,529591131 | 1,765125677 | 1,657779602 | 1,694970801 | 1,61691756  |
| <i>Cnst</i>          | 1,399540127 | 1,834677236 | 1,611039632 | 1,650877366 | 1,611894737 |
| <i>Cdyl2</i>         | 1,516641221 | 1,715133428 | 1,730117978 | 1,474599762 | 1,633012871 |
| <i>Ksr1</i>          | 1,47319396  | 1,666655862 | 1,727226715 | 1,50420001  | 1,569871099 |
| <i>Trat1</i>         | 1,552896424 | 1,764141297 | 1,61999199  | 1,497835977 | 1,555569042 |
| <i>Ubqln1</i>        | 1,372598059 | 1,665858065 | 1,662320414 | 1,522029115 | 1,746078934 |
| <i>Cdk19</i>         | 1,354166967 | 1,57659635  | 1,639070801 | 1,563757724 | 1,746184838 |
| <i>4930481A15Rik</i> | 1,280330558 | 1,658918431 | 1,596229557 | 1,561451597 | 1,7287805   |
| <i>Ctcf</i>          | 1,361893025 | 1,649554262 | 1,567940238 | 1,55415107  | 1,615243621 |
| <i>Zbtb24</i>        | 1,359377634 | 1,58462162  | 1,49334341  | 1,568452328 | 1,653900177 |
| <i>Ier3ip1</i>       | 1,381801242 | 1,61606194  | 1,681976853 | 1,639643415 | 1,566697267 |
| <i>Rnf43</i>         | 1,475224683 | 1,662805908 | 1,625355219 | 1,655622264 | 1,60654404  |
| <i>Mus81</i>         | 1,686092904 | 1,682578378 | 1,554908614 | 1,481081765 | 1,869273648 |
| <i>Fbxl22</i>        | 1,594162074 | 1,75908702  | 1,461191832 | 1,414132037 | 1,716595401 |
| <i>Klhdc9</i>        | 1,469946772 | 1,7007028   | 1,415290401 | 1,652189804 | 1,790583879 |
| <i>Rilp</i>          | 1,434479519 | 1,722293755 | 1,726131131 | 1,315535567 | 1,848644904 |
| <i>Cdk5r1</i>        | 1,4583511   | 1,715066095 | 1,820766732 | 1,25673665  | 1,842782196 |
| <i>Fbxo46</i>        | 1,380582587 | 1,65931528  | 1,71133033  | 1,375521403 | 1,971935497 |
| <i>Slc39a5</i>       | 1,58483456  | 1,600104119 | 1,677637363 | 1,27330893  | 1,950273121 |
| <i>Zbtb45</i>        | 1,291964466 | 1,812397021 | 1,492153179 | 1,390950158 | 1,891484087 |
| <i>Lsm10</i>         | 1,421069734 | 1,868506653 | 1,647231992 | 1,47802712  | 1,900044106 |
| <i>Abhd15</i>        | 1,615752422 | 1,562916827 | 1,666725981 | 1,447296777 | 1,734707831 |
| <i>Mgat4a</i>        | 1,664275518 | 1,486427864 | 1,69736902  | 1,46794405  | 1,73105729  |
| <i>Mgst2</i>         | 1,716969399 | 1,536061098 | 1,739283643 | 1,438212858 | 1,676241637 |
| <i>Vdac1</i>         | 1,586191971 | 1,462997819 | 1,805247332 | 1,422315666 | 1,737864419 |
| <i>Dalrd3</i>        | 1,640078129 | 1,390951068 | 1,723292669 | 1,401596407 | 1,794293222 |
| <i>1700003D09Rik</i> | 1,598146089 | 1,560813456 | 1,85543015  | 1,322496414 | 1,696954949 |
| <i>Fam36a</i>        | 1,572779715 | 1,616065046 | 1,736613104 | 1,376374202 | 1,679727076 |
| <i>Epm2aip1</i>      | 1,621354297 | 1,520816677 | 1,946794764 | 1,494745935 | 1,71382271  |
| <i>Ppp1r1b</i>       | 1,488634655 | 1,468254843 | 1,867824546 | 1,35950376  | 1,677601212 |
| <i>4933429K18Rik</i> | 1,456987999 | 1,404257906 | 1,7764114   | 1,271174311 | 1,750748285 |
| <i>Slc16a1</i>       | 1,464145816 | 1,559587114 | 1,920264048 | 1,369982437 | 1,911778408 |
| <i>Plcx2</i>         | 1,428405942 | 1,514580519 | 1,80159201  | 1,347739562 | 1,833908575 |
| <i>Lrmp</i>          | 1,411691114 | 1,73408331  | 1,754055652 | 1,560876994 | 1,6964664   |
| <i>Foxp4</i>         | 1,391036113 | 1,682773946 | 1,775844159 | 1,583399096 | 1,771634277 |
| <i>Fam71f2</i>       | 1,361179563 | 1,62695283  | 1,85555118  | 1,442087027 | 1,70881399  |
| <i>C1galt1</i>       | 1,434998607 | 1,693197553 | 1,861452934 | 1,558964364 | 1,790107311 |
| <i>Mrpl51</i>        | 1,457093347 | 1,724345043 | 1,939959312 | 1,532219423 | 1,783838723 |
| <i>Ano6</i>          | 1,495954594 | 1,706857149 | 1,840054866 | 1,543865215 | 1,681644528 |
| <i>Psmg1</i>         | 1,35633107  | 1,586556833 | 1,956740407 | 1,408169896 | 1,535254568 |

|                      |             |             |             |             |             |
|----------------------|-------------|-------------|-------------|-------------|-------------|
| <i>Rapgef1</i>       | 1,553348139 | 1,638904556 | 1,671204024 | 1,532286954 | 1,742324821 |
| <i>Pgs1</i>          | 1,599479726 | 1,568763607 | 1,700884698 | 1,54782886  | 1,726866316 |
| <i>Ampd1</i>         | 1,585780389 | 1,587372358 | 1,734671575 | 1,656395769 | 1,716039342 |
| <i>Chad</i>          | 1,515921053 | 1,499662013 | 1,592919997 | 1,667121212 | 1,669765709 |
| <i>Bscl2</i>         | 1,734169059 | 1,442585704 | 1,705468543 | 1,413848409 | 1,560242997 |
| <i>Hic1</i>          | 1,714134606 | 1,449712895 | 1,781346881 | 1,569682357 | 1,653430493 |
| <i>Pnkp</i>          | 1,651270701 | 1,488448506 | 1,719144677 | 1,599370343 | 1,479438277 |
| <i>Dpcd</i>          | 1,69031877  | 1,744663277 | 1,78856455  | 1,52745058  | 1,659493276 |
| <i>Gm11201</i>       | 1,666548909 | 1,652429704 | 1,75555069  | 1,596291019 | 1,671183273 |
| <i>Frmd6</i>         | 1,711950729 | 1,73442522  | 1,74050191  | 1,594157741 | 1,570305613 |
| <i>Gm15471</i>       | 1,739646546 | 1,758357293 | 1,621885927 | 1,477667444 | 1,667871607 |
| <i>Xpa</i>           | 1,686552847 | 1,743028013 | 1,625811303 | 1,530320662 | 1,58242692  |
| <i>C920006O11Rik</i> | 1,52137578  | 1,92173496  | 1,855043979 | 1,548428021 | 1,384805461 |
| <i>S1pr4</i>         | 1,541660648 | 1,752685248 | 1,875257641 | 1,404466832 | 1,422788721 |
| <i>Gm1337</i>        | 1,52597101  | 2,165911351 | 1,691355251 | 1,504299395 | 1,550890059 |
| <i>Tapt1</i>         | 1,584902199 | 1,760743328 | 1,840950885 | 1,346892109 | 1,603492624 |
| <i>2310040G24Rik</i> | 1,629577593 | 1,688438695 | 1,819865893 | 1,316129858 | 1,549734624 |
| <i>A930024E05Rik</i> | 1,694809822 | 1,825841766 | 1,830169722 | 1,272403686 | 1,505047914 |
| <i>A130077B15Rik</i> | 1,88767268  | 1,750058294 | 1,884971093 | 1,388830459 | 1,589705579 |
| <i>Pipox</i>         | 1,788222033 | 1,705995662 | 1,96883393  | 1,305781908 | 1,659357485 |
| <i>Olf1510</i>       | 1,697219909 | 1,886074328 | 1,793545593 | 1,036354043 | 1,459148549 |
| <i>Tnfrsf9</i>       | 1,460923505 | 1,78302731  | 2,069350575 | 1,601157214 | 1,867688763 |
| <i>Mbtps1</i>        | 1,478396062 | 1,680995697 | 2,038920222 | 1,654395711 | 1,932240057 |
| <i>Cdh24</i>         | 1,533209124 | 1,809820566 | 1,961703232 | 1,539962889 | 1,836850446 |
| <i>Kctd11</i>        | 1,40035409  | 1,674805602 | 1,976736716 | 1,314476855 | 2,004393167 |
| <i>Ccdc85b</i>       | 1,466460411 | 1,869117957 | 2,214814774 | 1,563868666 | 1,983086075 |
| <i>Ormdl3</i>        | 1,382482062 | 1,865798975 | 2,155869117 | 1,364237579 | 2,027361043 |
| <i>Ssbp3</i>         | 1,416684485 | 1,623283224 | 2,046004488 | 1,540380085 | 2,000417833 |
| <i>Arl6ip1</i>       | 1,266476225 | 1,532110482 | 2,097188273 | 1,577683979 | 1,986807745 |
| <i>Acd</i>           | 1,490310756 | 1,448736527 | 2,108812413 | 1,528448261 | 1,758436931 |
| <i>Lst1</i>          | 1,499753376 | 1,458014623 | 2,098519263 | 1,523379594 | 1,930786417 |
| <i>A630095N17Rik</i> | 1,086457119 | 1,822303642 | 1,902399661 | 1,687412749 | 1,542984312 |
| <i>Nr3c1</i>         | 1,190089054 | 1,849661688 | 1,731172568 | 1,710084725 | 1,583679386 |
| <i>Slc25a5</i>       | 1,327191123 | 1,892672602 | 1,827831732 | 1,712317338 | 1,401050772 |
| <i>Minpp1</i>        | 1,198707101 | 2,042833056 | 1,752138266 | 1,872399877 | 1,656007393 |
| <i>Srfbp1</i>        | 1,43840538  | 2,008836245 | 1,92631771  | 1,723149376 | 1,75064702  |
| <i>Cnn3</i>          | 1,404548487 | 1,97001675  | 1,926193203 | 1,663486723 | 1,637458259 |
| <i>Tmem11</i>        | 1,278761723 | 1,944198455 | 1,878325093 | 1,689145303 | 1,822059337 |
| <i>Rpl12</i>         | 1,41209848  | 1,935278294 | 1,860318533 | 1,564565762 | 1,724706542 |
| <i>Ripk3</i>         | 1,374236284 | 1,832066233 | 1,943243675 | 1,609135476 | 1,701318858 |
| <i>Ptprc</i>         | 1,3638598   | 1,843090607 | 1,838562415 | 1,506680955 | 1,60611999  |
| <i>Zfp3</i>          | 1,362420648 | 1,863164163 | 1,902257224 | 1,441530036 | 1,722556282 |
| <i>Gm10485</i>       | 1,388999687 | 1,865052475 | 1,855726608 | 1,446896738 | 1,82249846  |
| <i>Fkbp1a</i>        | 1,366983159 | 2,172101959 | 1,637852025 | 1,940123751 | 1,560200042 |
| <i>Pxmp4</i>         | 1,517601895 | 2,169536899 | 1,762739671 | 1,768627136 | 1,516000761 |
| <i>Slf5</i>          | 1,5303077   | 1,855770627 | 1,611994326 | 1,873029566 | 1,765936723 |
| <i>Spcs2</i>         | 1,658838837 | 1,88334428  | 1,579354055 | 1,764392753 | 1,660143257 |
| <i>Gm10007</i>       | 1,293030725 | 1,908073848 | 1,46524434  | 1,436997509 | 1,52005612  |
| <i>Zfp422</i>        | 1,190852167 | 1,815349745 | 1,535828606 | 1,406143761 | 1,466316718 |
| <i>2810008M24Rik</i> | 1,291663325 | 1,879398313 | 1,60004376  | 1,538316504 | 1,343799272 |
| <i>Trio</i>          | 1,221358477 | 1,752416146 | 1,557698681 | 1,581729519 | 1,443791808 |



|                      |             |             |             |             |             |
|----------------------|-------------|-------------|-------------|-------------|-------------|
| <i>Tnni1</i>         | 1,234713116 | 1,808913903 | 1,65472017  | 1,525173703 | 1,488357333 |
| <i>Dgkd</i>          | 1,265358803 | 1,707336566 | 1,613233165 | 1,570346322 | 1,550764255 |
| <i>Crygn</i>         | 1,217902838 | 1,897812893 | 1,464613854 | 1,69536993  | 1,404216022 |
| <i>Mamstr</i>        | 1,321750133 | 1,766961294 | 1,38763237  | 1,694327231 | 1,503837597 |
| <i>Smad5</i>         | 1,246108296 | 1,626403206 | 1,479556675 | 1,628548464 | 1,38597623  |
| <i>Got1</i>          | 1,348200485 | 1,719463915 | 1,392670305 | 1,642683014 | 1,298277232 |
| <i>A330076C08Rik</i> | 1,052342528 | 1,825682706 | 1,695547672 | 1,612680078 | 1,373876022 |
| <i>Selk</i>          | 1,076791175 | 2,000053964 | 1,63948755  | 1,612389546 | 1,166644851 |
| <i>Dynlt1b</i>       | 1,664808461 | 1,546967951 | 1,526105333 | 1,231513049 | 2,137202923 |
| <i>9930012K11Rik</i> | 1,484052586 | 1,5685884   | 1,473133506 | 1,150857665 | 1,96366885  |
| <i>1700003F12Rik</i> | 1,656545944 | 1,819717703 | 1,144451483 | 1,076265593 | 2,008343695 |
| <i>Mrfap1</i>        | 1,395813778 | 1,772973074 | 1,409854435 | 1,443194788 | 2,309764044 |
| <i>S100a6</i>        | 1,508242237 | 1,806088464 | 1,440834536 | 1,428727261 | 2,095682862 |
| <i>Ocel1</i>         | 1,46590782  | 2,038752871 | 1,473043126 | 1,218093944 | 2,107600542 |
| <i>Zfp593</i>        | 1,944028397 | 1,746159676 | 1,373884807 | 1,254932322 | 2,082621882 |
| <i>2610001J05Rik</i> | 1,784271058 | 1,935189216 | 1,369394862 | 1,550579374 | 2,110806123 |
| <i>E130218I03Rik</i> | 1,965062783 | 1,977885328 | 1,675925797 | 1,207223959 | 2,03201438  |
| <i>Ppp1r14b</i>      | 1,86177072  | 1,584131808 | 1,577390631 | 1,039539422 | 1,619480292 |
| <i>Nme4</i>          | 1,82119557  | 1,610030185 | 1,596340043 | 1,036358334 | 1,646905657 |
| <i>Card9</i>         | 1,858668957 | 1,657041786 | 1,515140542 | 1,013670296 | 1,512377615 |
| <i>Gm6623</i>        | 1,962648775 | 1,622239901 | 1,253366596 | 0,873525988 | 1,576043321 |
| <i>Rab24</i>         | 1,675633181 | 1,518607995 | 1,465039431 | 0,902768741 | 1,90042604  |
| <i>Pim3</i>          | 1,597934443 | 1,505733067 | 1,293739021 | 0,967694731 | 1,637923627 |
| <i>2210404O07Rik</i> | 1,695067574 | 1,587123281 | 1,630577597 | 0,644741061 | 1,748544181 |
| <i>Bmp7</i>          | 1,765791123 | 1,453447885 | 1,484243818 | 1,286810446 | 1,247222019 |
| <i>Dgke</i>          | 1,855495096 | 1,394551756 | 1,493268392 | 1,247910767 | 1,326387061 |
| <i>Cyb5b</i>         | 1,957472971 | 1,41794245  | 1,453299622 | 1,166910993 | 1,345095637 |
| <i>Creld1</i>        | 1,943876626 | 1,429780949 | 1,417327841 | 1,210691119 | 1,458401118 |
| <i>Hexim2</i>        | 1,643052424 | 1,260608787 | 1,465975672 | 1,172011784 | 1,265372134 |
| <i>Arhgef40</i>      | 1,678424558 | 1,330434819 | 1,454103444 | 1,121960194 | 1,291383732 |
| <i>Xkrx</i>          | 1,740922041 | 1,297801063 | 1,647485215 | 1,085923581 | 1,283255317 |
| <i>Tgfb1i1</i>       | 1,562367098 | 1,380572419 | 1,48720382  | 1,13406852  | 1,396178592 |
| <i>Shf</i>           | 1,604600785 | 1,422989998 | 1,46520789  | 1,192602336 | 1,474538067 |
| <i>Pex6</i>          | 1,462347045 | 1,426794399 | 1,378882958 | 1,174737935 | 1,4073948   |
| <i>Gm16793</i>       | 1,494987377 | 1,599279296 | 1,400670313 | 1,112638024 | 1,390260635 |
| <i>Dexi</i>          | 1,472350672 | 1,533652858 | 1,425410972 | 1,176708558 | 1,331740534 |
| <i>Zscan20</i>       | 1,549233306 | 1,578291808 | 1,436679116 | 1,206196893 | 1,395552411 |
| <i>Col15a1</i>       | 1,563915793 | 1,496616481 | 1,492831053 | 1,167080625 | 1,340651631 |
| <i>Pnrc2</i>         | 1,608458412 | 1,510970549 | 1,536679978 | 1,200155847 | 1,291687881 |
| <i>Ppef2</i>         | 1,718891127 | 1,575031753 | 1,543300103 | 1,108617203 | 1,393913113 |
| <i>Mgat5</i>         | 1,598669613 | 1,52652688  | 1,50500451  | 1,23613858  | 1,468928595 |
| <i>5730435O14Rik</i> | 1,597205048 | 1,52722167  | 1,494315033 | 1,119917503 | 1,505943218 |
| <i>Tbx19</i>         | 1,724481061 | 1,493865911 | 1,549072829 | 1,158730269 | 1,432953103 |
| <i>Ndrp2</i>         | 1,69743248  | 1,430252544 | 1,514364467 | 1,202970469 | 1,456871566 |
| <i>Usp1</i>          | 1,365518543 | 1,379780749 | 1,617704397 | 1,381743918 | 1,558035641 |
| <i>Gm4285</i>        | 1,341452809 | 1,349866137 | 1,602124384 | 1,332663963 | 1,48036666  |
| <i>Tspan5</i>        | 1,351217208 | 1,468099002 | 1,600250225 | 1,324524497 | 1,548208782 |
| <i>Zhx2</i>          | 1,42271554  | 1,383056669 | 1,460334373 | 1,308039253 | 1,483954504 |
| <i>Mtap7</i>         | 1,325073162 | 1,39890081  | 1,473394936 | 1,332564385 | 1,40034326  |
| <i>Mcoln2</i>        | 1,3586505   | 1,519217014 | 1,456624584 | 1,333760143 | 1,560215428 |
| <i>Neat1</i>         | 1,440866349 | 1,481125605 | 1,452750182 | 1,339900973 | 1,573145816 |

|                      |             |             |             |             |             |
|----------------------|-------------|-------------|-------------|-------------|-------------|
| <i>Zfp523</i>        | 1,531322045 | 1,471086204 | 1,48114867  | 1,246302557 | 1,534434074 |
| <i>Igf1r</i>         | 1,528949659 | 1,456913946 | 1,508058665 | 1,281840421 | 1,541147164 |
| <i>Csnk1e</i>        | 1,521277114 | 1,382826998 | 1,518862597 | 1,457554595 | 1,577304036 |
| <i>Wnt5b</i>         | 1,493014577 | 1,409545538 | 1,534087441 | 1,400462505 | 1,576821054 |
| <i>Msh5</i>          | 1,419005637 | 1,384689275 | 1,565672912 | 1,477989743 | 1,538388723 |
| <i>Zbtb8a</i>        | 1,477485379 | 1,318079782 | 1,521757436 | 1,373147246 | 1,622984716 |
| <i>Psmc3</i>         | 1,40840166  | 1,279598345 | 1,532293476 | 1,342740584 | 1,632978464 |
| <i>Fbxl18</i>        | 1,513706994 | 1,293119316 | 1,278813528 | 1,302628992 | 1,52477723  |
| <i>Nr2f6</i>         | 1,47880686  | 1,228759075 | 1,197666095 | 1,393018198 | 1,584853282 |
| <i>Pxt1</i>          | 1,504477887 | 1,25744155  | 1,335502739 | 1,427070334 | 1,398520034 |
| <i>5930416119Rik</i> | 1,562668636 | 1,443739573 | 1,242147387 | 1,40054657  | 1,543544237 |
| <i>Ftsj2</i>         | 1,490151379 | 1,493334235 | 1,276719941 | 1,371024519 | 1,545038817 |
| <i>Ficd</i>          | 1,826322098 | 1,327289374 | 1,594319085 | 1,557019232 | 1,50908478  |
| <i>Hcrt</i>          | 1,915250422 | 1,206269248 | 1,489078724 | 1,575302699 | 1,487262187 |
| <i>Ttc30a2</i>       | 1,700740716 | 1,094601291 | 1,712406501 | 1,492606183 | 1,677481941 |
| <i>Prr18</i>         | 1,610922219 | 1,097375818 | 1,474520905 | 1,814999486 | 1,491831454 |
| <i>Sult2b1</i>       | 1,532136727 | 1,195428053 | 1,442616497 | 1,58264275  | 1,599385151 |
| <i>Dirc2</i>         | 1,620133    | 1,305854017 | 1,45461906  | 1,562496321 | 1,626161245 |
| <i>C330006A16Rik</i> | 1,615662194 | 1,184502156 | 1,549563255 | 1,604080919 | 1,465294527 |
| <i>Gng10</i>         | 1,61843399  | 1,388101866 | 1,39327048  | 1,429519837 | 1,560402405 |
| <i>Zscan10</i>       | 1,707515009 | 1,324512446 | 1,34457498  | 1,548189437 | 1,448950599 |
| <i>Gpr3</i>          | 1,816685591 | 1,243831763 | 1,694034823 | 1,479389112 | 1,908068256 |
| <i>Dtx3</i>          | 1,671913203 | 1,371448251 | 1,5990436   | 1,496787162 | 1,950396422 |
| <i>Inhbe</i>         | 1,603629207 | 1,384415087 | 1,786637145 | 1,359560183 | 1,929397721 |
| <i>Cox8a</i>         | 1,621320786 | 1,253875035 | 1,726148219 | 1,23962724  | 1,923624512 |
| <i>Akt1s1</i>        | 1,745796261 | 1,545928366 | 1,681146888 | 1,357362894 | 1,897225208 |
| <i>2210016F16Rik</i> | 1,756855515 | 1,522047376 | 1,677989951 | 1,480362029 | 1,882601237 |
| <i>Med22</i>         | 1,796694683 | 1,511988761 | 1,560143046 | 1,389321415 | 1,874603312 |
| <i>Degs2</i>         | 1,783874945 | 1,470101144 | 1,590546212 | 1,483482055 | 1,730195934 |
| <i>Bbc3</i>          | 1,459071404 | 1,572159913 | 1,457072043 | 1,384657915 | 1,697257809 |
| <i>Tmem131</i>       | 1,480094809 | 1,558770565 | 1,602193449 | 1,470712952 | 1,736510026 |
| <i>2900008C10Rik</i> | 1,572628545 | 1,503033193 | 1,52174172  | 1,428019832 | 1,582332386 |
| <i>Rfx5</i>          | 1,597615606 | 1,542000794 | 1,503325303 | 1,455080598 | 1,592905007 |
| <i>Xbp1</i>          | 1,67006268  | 1,453249314 | 1,493665429 | 1,471059159 | 1,604873989 |
| <i>1700052K11Rik</i> | 1,646183978 | 1,576594588 | 1,545581974 | 1,509881543 | 1,668753742 |
| <i>Celsr1</i>        | 1,506186559 | 1,415264193 | 1,690604679 | 1,406644516 | 1,721155441 |
| <i>H2afy</i>         | 1,470223688 | 1,430128112 | 1,620065158 | 1,471836964 | 1,826544419 |
| <i>Slc25a22</i>      | 1,493438817 | 1,488599918 | 1,628366488 | 1,27969347  | 1,768349076 |
| <i>Cyb561d1</i>      | 1,541520225 | 1,467052201 | 1,599618991 | 1,363781043 | 1,729404092 |
| <i>Dnahc17</i>       | 1,667880246 | 1,327478757 | 1,490440084 | 1,264265014 | 1,599776746 |
| <i>Tjp3</i>          | 1,717889797 | 1,290273849 | 1,536793185 | 1,309096264 | 1,638582508 |
| <i>Gm10684</i>       | 1,790138753 | 1,413462348 | 1,57053762  | 1,317411518 | 1,623541867 |
| <i>Hlcs</i>          | 1,725646884 | 1,374814915 | 1,600664234 | 1,261196087 | 1,814893702 |
| <i>Nhp2l1</i>        | 1,708420348 | 1,357571536 | 1,553396387 | 1,328462267 | 1,790964051 |
| <i>Tab1</i>          | 1,624181018 | 1,399948769 | 1,542168617 | 1,272369308 | 1,727745351 |
| <i>Trim17</i>        | 1,463695154 | 1,295265196 | 1,441286688 | 1,448769713 | 1,763859492 |
| <i>Carns1</i>        | 1,459177139 | 1,306587832 | 1,497618562 | 1,468079179 | 1,767318341 |
| <i>Mfsd12</i>        | 1,507350258 | 1,31248122  | 1,386760247 | 1,333461224 | 1,712943495 |
| <i>Zcchc3</i>        | 1,625225272 | 1,46708136  | 1,326727952 | 1,367384579 | 1,89165897  |
| <i>Hist2h2be</i>     | 1,806014994 | 1,163364871 | 1,36319728  | 1,159971849 | 1,816292578 |
| <i>Tusc2</i>         | 1,864392211 | 1,161458947 | 1,353178393 | 1,472056545 | 1,983788467 |

|                      |             |             |             |             |             |
|----------------------|-------------|-------------|-------------|-------------|-------------|
| <i>Il20rb</i>        | 1,971637332 | 1,516887158 | 1,530303959 | 1,296344602 | 1,770418026 |
| <i>Ppp1r3e</i>       | 2,106196843 | 1,38891042  | 1,378154902 | 1,30119905  | 1,911623874 |
| <i>G630025P09Rik</i> | 1,293782024 | 1,171065194 | 1,515780388 | 1,440291322 | 1,64926177  |
| <i>Fam69b</i>        | 1,431456259 | 1,086767647 | 1,444495573 | 1,476533228 | 1,652828011 |
| <i>Lbr</i>           | 1,404026316 | 1,105610188 | 1,526071554 | 1,545726032 | 1,708486728 |
| <i>D17H6S56E-3</i>   | 1,471206833 | 1,161928002 | 1,555148011 | 1,551156944 | 1,774264741 |
| <i>Hint1</i>         | 1,377531398 | 1,215754598 | 1,530170299 | 1,527332969 | 1,961111163 |
| <i>Nradd</i>         | 1,352020261 | 1,188023295 | 1,441743069 | 1,477397072 | 1,935382565 |
| <i>Gna11</i>         | 1,305933412 | 1,028664884 | 1,504769173 | 1,573250653 | 1,893091032 |
| <i>Rrm2</i>          | 1,536790292 | 1,212786943 | 1,632663079 | 1,377927536 | 1,851831047 |
| <i>Gna15</i>         | 1,581677404 | 1,287005869 | 1,533117999 | 1,31759997  | 1,950598177 |
| <i>Fbxo5</i>         | 1,649015792 | 1,168994905 | 1,534682334 | 1,206900896 | 1,887982263 |
| <i>Tmem240</i>       | 1,343305502 | 1,145913968 | 1,557875135 | 1,161187267 | 1,961807792 |
| <i>LOC319574</i>     | 1,475889208 | 1,073667552 | 1,617405755 | 1,142943375 | 2,038537884 |
| <i>Baiap3</i>        | 1,411644472 | 0,940640492 | 1,287144076 | 1,207525064 | 1,825867409 |
| <i>Pcolce</i>        | 1,474815336 | 1,077435527 | 1,336717784 | 1,288085937 | 1,91115202  |
| <i>Cfd</i>           | 1,421866601 | 0,859582733 | 1,393115095 | 1,455576879 | 1,834565491 |
| <i>Ndufaf3</i>       | 1,583004465 | 0,775710807 | 1,383354164 | 1,152972078 | 1,809839447 |
| <i>Bax</i>           | 1,661734183 | 1,153544838 | 1,517104058 | 1,019613303 | 1,601329696 |
| <i>Gylt1b</i>        | 1,570532828 | 1,256601487 | 1,56342662  | 0,972352655 | 1,645707427 |
| <i>Itgad</i>         | 1,554343723 | 1,143240439 | 1,42389551  | 1,141203947 | 1,611349837 |
| <i>Gm572</i>         | 1,649326766 | 1,245383928 | 1,684372451 | 1,067449429 | 1,497981766 |
| <i>Pold1</i>         | 1,723309757 | 1,178114786 | 1,605792608 | 1,064958912 | 1,525133459 |
| <i>1110002N22Rik</i> | 1,651846253 | 1,165524933 | 1,597578634 | 1,185658859 | 1,608324744 |
| <i>Prdx5</i>         | 1,389621553 | 1,070144276 | 1,764839969 | 1,076557057 | 1,591340787 |
| <i>Tcirg1</i>        | 1,490210947 | 1,080499692 | 1,747488449 | 1,093293745 | 1,818611354 |
| <i>Lrrc23</i>        | 1,433219685 | 1,261472769 | 1,893509803 | 1,10311688  | 1,733254328 |
| <i>Pgap3</i>         | 1,502984909 | 1,165597427 | 1,782649449 | 0,858851598 | 1,745228849 |
| <i>Plcb2</i>         | 1,195653485 | 1,195654724 | 1,19509631  | 1,326175458 | 1,440493049 |
| <i>C030037D09Rik</i> | 1,260047074 | 1,238134613 | 1,079964792 | 1,335060544 | 1,471816312 |
| <i>Ano8</i>          | 1,268791866 | 1,200713338 | 1,293004504 | 1,30424953  | 1,491621403 |
| <i>Pik3r2</i>        | 1,260231931 | 1,149530862 | 1,291378635 | 1,34102332  | 1,558022263 |
| <i>Cxxc1</i>         | 1,319729666 | 1,153766193 | 1,288323299 | 1,226215687 | 1,554641237 |
| <i>Slc16a3</i>       | 1,240334987 | 1,239868502 | 1,164844466 | 1,513087373 | 1,658954287 |
| <i>Xkr8</i>          | 1,229702735 | 1,307734583 | 1,201237174 | 1,458813322 | 1,570245523 |
| <i>Syngn2</i>        | 1,38363826  | 1,185047688 | 1,133354385 | 1,351077202 | 1,78434867  |
| <i>Spag4</i>         | 1,34313859  | 1,013719565 | 1,127713429 | 1,325548079 | 1,785867138 |
| <i>Kpna2</i>         | 1,121135501 | 1,071671897 | 1,184499779 | 1,368662902 | 1,679118558 |
| <i>Kif22</i>         | 1,193015198 | 0,961849709 | 1,12453349  | 1,339525065 | 1,716622686 |
| <i>Fgf22</i>         | 1,527217305 | 1,105749799 | 0,893583327 | 1,185608436 | 1,784695517 |
| <i>Chst14</i>        | 1,562074609 | 1,076623562 | 0,851274472 | 1,418454379 | 1,742123669 |
| <i>Nprl2</i>         | 1,251176484 | 1,003905923 | 0,842101626 | 1,256931551 | 1,907208946 |
| <i>Commd5</i>        | 1,542643748 | 1,528559618 | 0,797712409 | 1,478978602 | 1,568494355 |
| <i>Dnase1l2</i>      | 1,252534434 | 1,511287111 | 0,827637478 | 1,279827269 | 1,661077614 |
| <i>A830009L08Rik</i> | 0,95743242  | 1,152670025 | 1,242644039 | 0,997266688 | 1,34597343  |
| <i>Tcf3</i>          | 0,933484541 | 1,131247811 | 1,268509728 | 1,002799588 | 1,359736137 |
| <i>Ldlrad1</i>       | 1,013717864 | 1,042666739 | 1,228010317 | 1,032060725 | 1,403042903 |
| <i>Gm6644</i>        | 0,985125149 | 1,148364892 | 1,253712887 | 1,110759129 | 1,404754495 |
| <i>Akr1b3</i>        | 0,979085555 | 1,143843242 | 1,250570485 | 1,113687454 | 1,402363309 |
| <i>Taf4a</i>         | 0,938567235 | 1,106522778 | 1,249482457 | 1,127222741 | 1,417394914 |
| <i>Tnrc18</i>        | 0,874768729 | 1,168185543 | 1,292207841 | 1,052920027 | 1,441309718 |

|                      |             |             |             |             |             |
|----------------------|-------------|-------------|-------------|-------------|-------------|
| <i>Myl7</i>          | 0,880240957 | 1,148820531 | 1,268790793 | 1,050912423 | 1,409883835 |
| <i>Zfp652</i>        | 0,96753153  | 1,125670907 | 1,16622842  | 1,154582727 | 1,515752795 |
| <i>Fhod1</i>         | 0,890357581 | 1,118962442 | 1,167883995 | 1,126295259 | 1,478218931 |
| <i>Slc25a29</i>      | 0,970444861 | 1,112315369 | 1,157352675 | 1,054708324 | 1,457649614 |
| <i>Sytl3</i>         | 1,180582222 | 1,165850585 | 1,317294136 | 1,050964867 | 1,408861287 |
| <i>Grrp1</i>         | 1,14560204  | 1,133121775 | 1,267934545 | 1,068802928 | 1,428924273 |
| <i>Fkbp10</i>        | 1,199990431 | 1,054580867 | 1,312733809 | 1,08898965  | 1,426338518 |
| <i>Airn</i>          | 1,064897622 | 1,149483099 | 1,375945254 | 1,171004419 | 1,386337154 |
| <i>Clic4</i>         | 1,119995919 | 1,181369183 | 1,345489265 | 1,116854024 | 1,377695369 |
| <i>Ano10</i>         | 1,115943379 | 1,185678543 | 1,317742286 | 1,161354532 | 1,469384102 |
| <i>Ehbp1l1</i>       | 1,149535519 | 1,032158154 | 1,276067766 | 1,083944732 | 1,360719617 |
| <i>Pmf1</i>          | 1,139292126 | 1,020594656 | 1,23354621  | 1,137152209 | 1,323613748 |
| <i>Ghdc</i>          | 1,10055354  | 1,061598955 | 1,316070602 | 1,182974203 | 1,347380426 |
| <i>Dym</i>           | 1,115943135 | 1,115672132 | 1,199356967 | 1,154899435 | 1,337897793 |
| <i>Sh3pxd2a</i>      | 1,148945994 | 1,173062476 | 1,244597393 | 1,129608166 | 1,305802358 |
| <i>Lamb2</i>         | 1,096631774 | 1,125635141 | 1,268902194 | 1,10299115  | 1,320026606 |
| <i>Bcl7a</i>         | 1,117274289 | 1,125188227 | 1,260152044 | 1,062909634 | 1,300547338 |
| <i>Uggt1</i>         | 1,0787931   | 1,101064822 | 1,222692874 | 1,109057258 | 1,295509979 |
| <i>Snx33</i>         | 1,05528203  | 1,359589452 | 1,330751804 | 1,182508164 | 1,358246693 |
| <i>Rrp7a</i>         | 1,028443463 | 1,347331163 | 1,370363099 | 1,220185344 | 1,375918696 |
| <i>Ap4m1</i>         | 0,994755273 | 1,356227479 | 1,334280959 | 1,10820529  | 1,456982587 |
| <i>Acaa2</i>         | 0,964499067 | 1,242315885 | 1,360833771 | 1,084392301 | 1,523093122 |
| <i>Rnf38</i>         | 0,919125121 | 1,196728012 | 1,378432285 | 1,150658223 | 1,456637112 |
| <i>Ung</i>           | 1,026792043 | 1,217652768 | 1,318617243 | 1,021711474 | 1,353063405 |
| <i>Pitpna</i>        | 1,12043358  | 1,250866787 | 1,33711816  | 1,064981808 | 1,350053371 |
| <i>Arntl</i>         | 1,157380944 | 1,280572417 | 1,357461665 | 0,972131409 | 1,317929705 |
| <i>Man2a2</i>        | 1,121371694 | 1,328859765 | 1,276584952 | 0,944922657 | 1,343775216 |
| <i>Emilin1</i>       | 1,138520147 | 1,234256441 | 1,285605849 | 1,052419673 | 1,490258194 |
| <i>BC004004</i>      | 1,238227195 | 1,220999579 | 1,27389079  | 1,054137104 | 1,432212385 |
| <i>Atmin</i>         | 0,929999099 | 1,208100757 | 1,407156872 | 1,039097071 | 1,315320416 |
| <i>Stoml1</i>        | 0,939115701 | 1,310656476 | 1,311719243 | 0,943307782 | 1,407181193 |
| <i>Nfkb2</i>         | 1,038652327 | 1,303772653 | 1,27140789  | 0,940085037 | 1,314169689 |
| <i>1110049F12Rik</i> | 1,014227562 | 1,276899916 | 1,234919834 | 0,900084699 | 1,261980005 |
| <i>Tspan1</i>        | 1,035747731 | 1,415012245 | 1,260264884 | 0,957663443 | 1,236506828 |
| <i>Ggt5</i>          | 0,990572439 | 1,317288608 | 1,298847556 | 1,053050927 | 1,242199974 |
| <i>P4htm</i>         | 1,024616924 | 1,289974412 | 1,302801469 | 1,03930382  | 1,268741732 |
| <i>E330017L17Rik</i> | 1,098284659 | 1,229895119 | 1,241213645 | 0,921739571 | 1,448034631 |
| <i>Dazap2</i>        | 1,035663844 | 1,23478368  | 1,196507288 | 0,916642444 | 1,527707078 |
| <i>Cdv3</i>          | 0,96391245  | 1,174437968 | 1,304367265 | 0,816862469 | 1,479393656 |
| <i>Dyrk1b</i>        | 1,015586903 | 1,39335264  | 1,208422788 | 0,805507835 | 1,337324022 |
| <i>1700096J18Rik</i> | 1,140906237 | 1,180012533 | 1,161631611 | 0,993932287 | 1,508949134 |
| <i>Gm88</i>          | 1,128513934 | 1,112003358 | 1,13138409  | 0,995447051 | 1,480929913 |
| <i>Anapc11</i>       | 1,09966919  | 1,09956046  | 1,115767926 | 1,056676975 | 1,528198797 |
| <i>Sorl1</i>         | 1,091990784 | 1,09693607  | 1,266144185 | 1,031537342 | 1,519843562 |
| <i>Bcl7c</i>         | 1,232945391 | 1,127478613 | 1,122717745 | 0,918656049 | 1,531665063 |
| <i>Ddn</i>           | 1,334070006 | 1,082698252 | 1,363730881 | 0,974410236 | 1,64858711  |
| <i>Dbp</i>           | 1,303451451 | 1,233776092 | 1,377492091 | 0,891086493 | 1,642566513 |
| <i>Ccdc88b</i>       | 1,287817594 | 1,26679733  | 1,351106312 | 1,175421215 | 1,707589324 |
| <i>Ltc4s</i>         | 1,251030485 | 1,33313701  | 1,291189182 | 1,122474088 | 1,70591126  |
| <i>Zfp319</i>        | 1,243757343 | 1,42565523  | 1,171050277 | 1,113324766 | 1,742568318 |
| <i>4930427A07Rik</i> | 1,514748917 | 1,228987727 | 1,11921685  | 0,695772288 | 1,361627571 |

|                      |             |             |             |             |             |
|----------------------|-------------|-------------|-------------|-------------|-------------|
| <i>9330133O14Rik</i> | 1,487042536 | 1,165031548 | 1,255966477 | 0,754737226 | 1,329091987 |
| <i>Gadd45b</i>       | 1,53476235  | 1,34537808  | 0,992135847 | 0,807430606 | 1,589566698 |
| <i>Rell2</i>         | 1,265602197 | 1,360282494 | 1,055572948 | 0,728092701 | 1,346433116 |
| <i>Casp6</i>         | 1,280177261 | 1,304904309 | 1,115366852 | 0,880734683 | 1,325597652 |
| <i>Sftpc</i>         | 1,144986512 | 1,191555042 | 1,105563331 | 0,880476052 | 1,37856948  |
| <i>1810021B22Rik</i> | 1,154107088 | 1,236366918 | 1,093714435 | 0,889312848 | 1,342653855 |
| <i>Prrt3</i>         | 1,357437441 | 1,378798912 | 1,027578176 | 0,972035236 | 1,186349671 |
| <i>Zfp358</i>        | 1,359833904 | 1,40913545  | 1,161168436 | 0,878002364 | 1,142968549 |
| <i>1600029D21Rik</i> | 1,312228888 | 1,308064942 | 1,160809779 | 1,300306652 | 1,090380811 |
| <i>Prickle1</i>      | 1,243583306 | 1,327065971 | 1,181370546 | 1,288068501 | 1,117485736 |
| <i>LOC622124</i>     | 1,257490856 | 1,358912704 | 1,114375    | 1,354753671 | 1,079626268 |
| <i>Padi1</i>         | 1,152088667 | 1,267356128 | 1,125217822 | 1,383716656 | 1,152952259 |
| <i>Phldb1</i>        | 1,270498308 | 1,348097167 | 1,140081213 | 1,446889043 | 1,278352916 |
| <i>Tram2</i>         | 1,257847444 | 1,400490376 | 1,345855156 | 1,299186997 | 1,242254053 |
| <i>Zfp365</i>        | 1,268331909 | 1,446642667 | 1,284633668 | 1,337307924 | 1,186788222 |
| <i>Etv6</i>          | 1,135619402 | 1,448484455 | 1,24334412  | 1,324973923 | 1,281445727 |
| <i>Nudt4</i>         | 1,278615164 | 1,580459159 | 1,342965665 | 1,326532852 | 1,205656721 |
| <i>2900005J15Rik</i> | 1,253231864 | 1,542417387 | 1,316032469 | 1,250991198 | 1,278306991 |
| <i>Atp6v0a1</i>      | 1,271717586 | 1,381619962 | 1,275832881 | 1,245556361 | 1,339573494 |
| <i>Nudcd3</i>        | 1,303664352 | 1,418321209 | 1,346855823 | 1,167215884 | 1,304934932 |
| <i>Cd2bp2</i>        | 1,329846338 | 1,36640183  | 1,28936942  | 1,222495807 | 1,468339311 |
| <i>Trabd</i>         | 1,143840283 | 1,293157716 | 1,122007055 | 1,164674513 | 1,379725433 |
| <i>Wdr81</i>         | 1,17049743  | 1,315377197 | 1,16038208  | 1,197993764 | 1,411289914 |
| <i>St3gal6</i>       | 1,099832152 | 1,384256358 | 1,167269499 | 1,179369382 | 1,34524755  |
| <i>Prr14</i>         | 1,261307349 | 1,409568137 | 1,133230628 | 1,224241363 | 1,324988051 |
| <i>Rab26</i>         | 1,42188036  | 1,444963687 | 1,092842451 | 1,163057871 | 1,478495738 |
| <i>Zfyve21</i>       | 1,347620857 | 1,327893438 | 1,120577182 | 1,072966947 | 1,369409974 |
| <i>Ubtd1</i>         | 1,112696311 | 1,405052335 | 1,40246545  | 1,092886055 | 1,159174927 |
| <i>Slc35e3</i>       | 1,094684963 | 1,370049056 | 1,381265523 | 1,081622858 | 1,211504833 |
| <i>Lamb3</i>         | 1,134438239 | 1,394047078 | 1,283595494 | 1,098621129 | 1,317698129 |
| <i>Pdcd1</i>         | 1,224384541 | 1,366894477 | 1,479568301 | 1,262679209 | 1,217299323 |
| <i>Mef2b</i>         | 1,286850638 | 1,335845711 | 1,486396947 | 1,24741949  | 1,307224918 |
| <i>Wdr63</i>         | 1,307375434 | 1,311637179 | 1,45905086  | 1,115108393 | 1,246657653 |
| <i>Ssbp2</i>         | 1,349878053 | 1,281137003 | 1,314287885 | 1,144732222 | 1,196657932 |
| <i>Itpr2</i>         | 1,313938971 | 1,245261089 | 1,21024344  | 1,162511711 | 1,190979492 |
| <i>Gm15545</i>       | 1,298746762 | 1,325931989 | 1,230740927 | 1,120963764 | 1,291308401 |
| <i>Zfp771</i>        | 1,241421022 | 1,217697183 | 1,295523303 | 1,062559536 | 1,276196505 |
| <i>Cnnm4</i>         | 1,248226385 | 1,229408732 | 1,294112458 | 1,020792294 | 1,288395797 |
| <i>D18Ert653e</i>    | 1,290753474 | 1,240304945 | 1,357217831 | 1,11582914  | 1,349974464 |
| <i>Zfp704</i>        | 1,253836217 | 1,243668795 | 1,284702665 | 1,124881276 | 1,086318009 |
| <i>Pdp1</i>          | 1,254841924 | 1,297902809 | 1,3263784   | 1,13299972  | 1,070553701 |
| <i>Ralgps2</i>       | 1,204326006 | 1,317769526 | 1,323673527 | 1,148181355 | 1,198499954 |
| <i>Zpbp2</i>         | 1,188029847 | 1,313365157 | 1,325405251 | 1,314490733 | 1,178966357 |
| <i>Nod2</i>          | 1,116748451 | 1,284943758 | 1,338848876 | 1,273651954 | 1,139991598 |
| <i>Sav1</i>          | 1,123124242 | 1,142665454 | 1,352610636 | 1,185083861 | 1,151004042 |
| <i>Al314976</i>      | 1,047791284 | 1,229581207 | 1,399949264 | 1,206523449 | 1,138071822 |
| <i>Rab33b</i>        | 1,144623084 | 1,175016745 | 1,34469274  | 1,178212911 | 1,026056471 |
| <i>Smad1</i>         | 1,132157211 | 1,288102347 | 1,394358325 | 1,27948514  | 1,331891861 |
| <i>Mrpl2</i>         | 1,215002133 | 1,26946371  | 1,361878818 | 1,373161826 | 1,332551277 |
| <i>4933433H22Rik</i> | 1,218305631 | 1,259963875 | 1,455782186 | 1,248327893 | 1,378708936 |
| <i>lah1</i>          | 1,173316522 | 1,204951269 | 1,437909032 | 1,242012391 | 1,414545631 |

|                      |             |             |             |             |             |
|----------------------|-------------|-------------|-------------|-------------|-------------|
| <i>Cat</i>           | 1,307079724 | 1,254806146 | 1,370879106 | 1,321269746 | 1,338599296 |
| <i>Lsr</i>           | 1,341372938 | 1,223266492 | 1,339307561 | 1,234024488 | 1,333000828 |
| <i>Carkd</i>         | 1,261810973 | 1,19772     | 1,341250364 | 1,279656431 | 1,234274465 |
| <i>Phf17</i>         | 1,134407887 | 1,315356221 | 1,286746702 | 1,208578194 | 1,307514586 |
| <i>Gabpb2</i>        | 1,183511683 | 1,261948024 | 1,260023782 | 1,265152397 | 1,290910059 |
| <i>Parvg</i>         | 1,131626298 | 1,211872943 | 1,311747736 | 1,202119834 | 1,29688718  |
| <i>6720401G13Rik</i> | 1,155956888 | 1,263869684 | 1,231635077 | 1,24655128  | 1,439823978 |
| <i>Gdf3</i>          | 1,161369135 | 1,27933689  | 1,246230873 | 1,147597741 | 1,403302949 |
| <i>Smagp</i>         | 1,273996555 | 1,151609806 | 1,237951339 | 1,195464216 | 1,31000003  |
| <i>St6galnac5</i>    | 1,27035995  | 1,195181977 | 1,217274969 | 1,282044385 | 1,348204358 |
| <i>Chrne</i>         | 1,192493117 | 1,113490664 | 1,246498487 | 1,285194433 | 1,343852153 |
| <i>4930594C11Rik</i> | 1,205839474 | 1,140943237 | 1,265466824 | 1,179368263 | 1,412078025 |
| <i>Acta2</i>         | 1,203961355 | 1,165257742 | 1,276014525 | 1,253456941 | 1,437640397 |
| <i>Apba3</i>         | 1,212236387 | 1,195552278 | 1,325608622 | 1,181841737 | 1,366935757 |
| <i>Atp10a</i>        | 1,625181416 | 1,478024505 | 1,300964156 | 1,265244473 | 1,139911761 |
| <i>4930415O20Rik</i> | 1,667667647 | 1,423935513 | 1,318925464 | 1,376424216 | 1,163941071 |
| <i>Agpat2</i>        | 1,601165795 | 1,27173761  | 1,405222796 | 1,219306132 | 1,100847932 |
| <i>Mtmr11</i>        | 1,584366578 | 1,368558254 | 1,421594164 | 1,262082715 | 1,165356983 |
| <i>6330406I15Rik</i> | 1,584818289 | 1,348748763 | 1,468120754 | 1,314750912 | 1,293273534 |
| <i>Klf10</i>         | 1,47120277  | 1,385839112 | 1,511367381 | 1,353546108 | 1,310767414 |
| <i>Cstf1</i>         | 1,578077019 | 1,429840089 | 1,366475884 | 1,309434381 | 1,376683946 |
| <i>Elfn2</i>         | 1,481676517 | 1,304191372 | 1,374838275 | 1,223970873 | 1,267116155 |
| <i>Isoc1</i>         | 1,486479963 | 1,292555717 | 1,363829897 | 1,358551072 | 1,273969851 |
| <i>Hexim1</i>        | 1,420872963 | 1,475745994 | 1,48479309  | 1,270993825 | 1,092338769 |
| <i>Spcs1</i>         | 1,552575615 | 1,500039242 | 1,497190471 | 1,213047608 | 1,153405025 |
| <i>C030034L19Rik</i> | 1,475520178 | 1,465135633 | 1,449131017 | 1,022918607 | 1,156364926 |
| <i>Xpc</i>           | 1,502449085 | 1,465364929 | 1,483215296 | 1,111982196 | 1,210606502 |
| <i>Cd164l2</i>       | 1,352443298 | 1,355927129 | 1,40462199  | 1,250457535 | 1,038296932 |
| <i>Cln6</i>          | 1,48712374  | 1,385912107 | 1,399620574 | 1,256887689 | 1,057393774 |
| <i>Bcl6</i>          | 1,439363471 | 1,467979849 | 1,294512968 | 1,110601194 | 0,957990067 |
| <i>Rnf169</i>        | 1,48729752  | 1,278370048 | 1,251715836 | 1,116793599 | 1,112420676 |
| <i>Usp2</i>          | 1,452407162 | 1,203971983 | 1,202811969 | 1,12410854  | 1,202706577 |
| <i>Kcnab3</i>        | 1,473121624 | 1,32563316  | 1,173586047 | 1,001011503 | 1,159995022 |
| <i>Srp68</i>         | 1,575552069 | 1,272592053 | 1,28474521  | 1,120659449 | 1,343195871 |
| <i>Rpf2</i>          | 1,539991216 | 1,269787751 | 1,204056899 | 1,194920344 | 1,323688961 |
| <i>Zfp39</i>         | 1,59123602  | 1,398822306 | 1,375664926 | 1,146216618 | 1,243046033 |
| <i>Gm20139</i>       | 1,517207232 | 1,431904749 | 1,237502809 | 1,186079872 | 1,207193263 |
| <i>Dclre1b</i>       | 1,620419679 | 1,528138631 | 1,211756807 | 1,172360332 | 1,343157926 |
| <i>Tpra1</i>         | 1,508151183 | 1,276426578 | 1,387283601 | 0,9751678   | 1,223022503 |
| <i>Nfkbie</i>        | 1,425762171 | 1,212224731 | 1,391179719 | 1,058354133 | 1,318500584 |
| <i>Shmt2</i>         | 1,471799415 | 1,192732384 | 1,487536348 | 1,134169204 | 1,386052039 |
| <i>Gpr56</i>         | 1,508512419 | 1,252227256 | 1,435833534 | 1,072252346 | 1,471574996 |
| <i>Ankrd23</i>       | 1,428327461 | 1,137529545 | 1,197990565 | 1,00101166  | 1,290859424 |
| <i>Sin3b</i>         | 1,409958775 | 1,109876743 | 1,220718057 | 1,071508533 | 1,395609352 |
| <i>Mgat1</i>         | 1,393478535 | 1,232427227 | 1,243039754 | 1,120501053 | 1,364815033 |
| <i>Helz</i>          | 1,434415735 | 1,248475291 | 1,24181952  | 1,082902869 | 1,284103069 |
| <i>2810410L24Rik</i> | 1,522261444 | 1,231257458 | 1,249975758 | 0,928164275 | 1,432369921 |
| <i>Adamtsl2</i>      | 1,594966048 | 1,309566856 | 1,703577111 | 0,696273531 | 1,190314561 |
| <i>Marcks</i>        | 1,356753321 | 1,117468021 | 1,65485622  | 0,775612848 | 1,047470205 |
| <i>Hpd1</i>          | 1,322256763 | 1,318518741 | 1,755745998 | 1,111651468 | 1,313514783 |
| <i>Mn1</i>           | 1,406177894 | 1,393679043 | 1,581527341 | 1,132314682 | 1,315393269 |

|                      |             |             |             |             |             |
|----------------------|-------------|-------------|-------------|-------------|-------------|
| <i>Zdhhc12</i>       | 1,223317237 | 1,27536484  | 1,661923981 | 1,10550834  | 1,074520228 |
| <i>4921531C22Rik</i> | 1,220447161 | 1,550936133 | 1,460120627 | 0,997785585 | 1,147377462 |
| <i>Gm15915</i>       | 1,227581035 | 1,703697996 | 1,474291081 | 0,823868145 | 1,032090735 |
| <i>2300002M23Rik</i> | 1,450638285 | 1,624511653 | 1,419026986 | 0,704441665 | 1,254125467 |
| <i>Slc25a11</i>      | 1,016547599 | 1,461299438 | 1,531223188 | 0,760335348 | 1,266888703 |
| <i>H1f0</i>          | 1,14150096  | 1,471531373 | 1,45189266  | 0,836747079 | 1,36551247  |

**Supplementary Table 7. List of the genes depicted in Figure 5c.** The genes are separated based on the pattern of changes in intragenic 5hmC and gene expression they show.

**CD4 SP vs. DP (left panel)**

| <b>SAME</b>   | <b>OPPOSITE</b> |
|---------------|-----------------|
| Aqp11         | 3930402G23Rik   |
| Mllt6         | Lgals7          |
| Ikzf4         | LOC100859962    |
| Gcnt7         | A430107P09Rik   |
| Cxcr4         | 2310001H17Rik   |
| Tmprss4       | Ly6c2           |
| Id2           | Ppp1r3e         |
| 2010001M09Rik | Gm1337          |
| A430093F15Rik | Ggn             |
| Galk1         | Tbrg3           |
| H2-Q1         | E030018B13Rik   |
| Osm           | 4931406H21Rik   |
| Tgfbr2        |                 |
| Cela1         |                 |
| 2210020M01Rik |                 |
| Cd274         |                 |
| 9330175E14Rik |                 |
| Skil          |                 |
| Rgs3          |                 |
| Lgals1        |                 |
| Bcl2l1        |                 |
| 4930572J05Rik |                 |
| S1pr1         |                 |
| Ptgir         |                 |
| Rapgef3       |                 |
| Dusp6         |                 |
| Fabp4         |                 |
| P2rx1         |                 |
| Nron          |                 |
| Ccr4          |                 |
| Ccr7          |                 |
| Ccr8          |                 |
| Isg15         |                 |
| A430035B10Rik |                 |
| Trp53i11      |                 |
| Esrp2         |                 |
| BC024582      |                 |
| Rorc          |                 |
| Ugcg          |                 |
| Ng23          |                 |

**CD8 SP vs. DP (right panel)**

| <b>SAME</b>   | <b>OPPOSITE</b> |
|---------------|-----------------|
| Aqp11         | Lgals7          |
| Mllt6         | Ifitm3          |
| Gm10640       | Cd52            |
| Ikzf4         | Hoxa4           |
| Gcnt7         | Ly6c2           |
| Kcnip2        | Ppp1r3e         |
| Tmprss4       | 6530439I21      |
| Id2           | Tmem88          |
| Plekho1       | Ggn             |
| H2-Q5         | Gng3            |
| H2-Q4         | Tbrg3           |
| H2-Q1         | Ltb             |
| Osm           | B230319C09Rik   |
| Tgfbr2        | Gm10390         |
| Cela1         | 4930542H20Rik   |
| 2210020M01    | E030018B13Rik   |
| Cd274         | 1700125G22Rik   |
| Rarg          | 4933427E11Rik   |
| 9330175E14Rik |                 |
| Vasp          |                 |
| Fam113b       |                 |
| Rgs3          |                 |
| Nfkbiz        |                 |
| Bcl2l1        |                 |
| S1pr1         |                 |
| Dtx1          |                 |
| Rapgef3       |                 |
| Serpinf1      |                 |
| P2rx1         |                 |
| Nron          |                 |
| Gramd4        |                 |
| Ccr7          |                 |
| Ccr8          |                 |
| Isg15         |                 |
| Tpst2         |                 |
| A430035B10Rik |                 |
| Bcl9l         |                 |
| Gm5547        |                 |
| Esrp2         |                 |
| BC024582      |                 |



Gpr152  
Mapk11  
Adipoq  
H2-T24  
Cytip  
Neur13  
Mettl7b  
Rab44  
Gm13546  
Klf2  
Slurp1  
Nr4a1  
Mad1l1  
I730030J21Rik  
Gpr146  
9430014N10Rik  
Lingo4  
Foxo1  
Amigo2  
Map3k6  
2310015A10Rik  
Fstl3  
Il27ra  
Fam102a  
Chchd10  
Rln3  
A630055G03Rik  
Dntt  
Prodh  
4732490B19Rik  
Tubb2a  
Tubb2b  
Arrdc5  
Ecm1  
Bcl3  
Cd8b1  
Xrra1  
Cc dc153  
2010016I18Rik  
Leprel4  
Gm11541  
A930003A15Rik  
Spc24  
Tuba4a  
Ctsw  
Ttc16

Rorc  
Rhof  
Ng23  
Mapk11  
Neur13  
Klf2  
Slurp1  
Nr4a1  
Mad1l1  
I730030J21Rik  
Gpr146  
Siglec15  
Tdgf1  
Foxo1  
Amigo2  
Prps1l1  
Fstl3  
4931403G20Rik  
Il27ra  
Fam102a  
Chchd10  
Rln3  
Prodh  
4732490B19Rik  
Tubb2a  
Tubb2b  
C1qtnf6  
Arrdc5  
Stra8  
Bcl3  
Xrra1  
Aif1  
Cc dc153  
Serinc5  
2010016I18Rik  
Leprel4  
Tnfrsf1b  
A930003A15Rik  
Gpr114  
Tuba4a  
AW112010  
Ctsw  
BB031773  
0610005C13Rik  
Cd1d2  
B2m

BB031773  
0610005C13Rik  
Plekhf1  
B2m  
Fbxl12  
Gm12250  
1700019L03Rik  
Egr2  
Egr3  
Egr1  
Slc6a19  
Thy1  
Endou  
Tifab  
Tmem52  
Agtrap  
Slc37a2  
Zfp36l1  
Syt13  
2700046G09Rik  
Lfng  
Rcan3  
B230118H07Rik  
Phospho1  
Tnfrsf4  
Cd8a  
Ptcra  
Bst1  
C2cd4d  
Tmem121  
4930417O13Rik  
Il6ra  
Gm11648  
1700064M15Rik  
1600002D24Rik  
Fam166b  
Galnt6  
Gfi1  
Arsi  
B4galnt1  
Anxa2  
Pafah1b3  
Gm10345  
Enc1  
Bach2  
Enpp7

Fbxl12  
Gm12250  
1700019L03Rik  
Cotl1  
Ncf1  
Egr2  
Egr3  
Egr1  
Slc6a19  
Cldnd2  
Rps6ka1  
Endou  
Tmem52  
Agtrap  
Slc37a2  
Zfp36l1  
Syt13  
Lfng  
Fam26f  
Clcf1  
B230118H07Rik  
Stat1  
Tnfrsf9  
Slc26a10  
Cd82  
Ptcra  
C2cd4d  
Tmem121  
4930417O13Rik  
Il6ra  
Ccnd2  
Gm11648  
1600002D24Rik  
Clec2d  
Galnt6  
Cyth4  
Gfi1  
Arsi  
Stk10  
Capn11  
B4galnt1  
Anxa2  
Sema4a  
Cd79a  
Ptms  
Gm10345

Qprt  
1810019D21Rik  
Zfp281  
Spsb2  
Spsb1  
Cdca7  
Plk3  
St3gal2  
Tdrd5  
Ccdc42b  
Gpr65  
D830046C22Rik  
Cldn4  
G630016D24Rik  
Gtdc2  
Gm5083  
Cd69  
8430423G03Rik  
Gtf2h4  
St6gal1  
Fam46c  
Tnfrsf25  
5730422E09Rik  
Tube1  
Itgb3  
Stk17b  
Nab2  
Smad7  
Kbtbd11  
Gm525  
Gpr183  
Apol9b  
Cnn2  
Rtp4  
Gm15708  
Grb7  
Colq  
B3gnt8  
Gpr18  
Tle6  
4933422H20Rik  
Plxnd1  
Fam43a  
Prss57  
Tnfaip8l2  
1700030A11Rik

Enc1  
Enpp7  
Qprt  
Ets2  
Itgb7  
1810019D21Rik  
Spsb1  
Cdca7  
Atp1b3  
Fam65b  
Ccdc42b  
Gpr65  
Ldhd  
Cldn4  
G630016D24Rik  
S100a2  
Gtdc2  
Cd69  
Gtf2h4  
Orai1  
Cx3cr1  
BC057022  
Fam46c  
Tnfrsf25  
Hcst  
Gphb5  
5730422E09Rik  
Tube1  
Itgb3  
Stk17b  
Nab2  
Smad7  
Kbtbd11  
Gm525  
Apol9b  
Cnn2  
Rasa3  
Rtp4  
D930028M14Rik  
Colq  
B3gnt8  
Gpr18  
Tle6  
Plxnd1  
Ccdc102a  
Prss57

Shisa5  
Paqr6  
Il17rb  
Insl5  
Jdp2  
Itm2a  
Rag2  
Rag1  
Hist1h2bp  
Tmem151b  
Ptpn14  
Xylt2  
Pglyrp2  
Bcl2  
Ilvbl  
Gimap8  
Gimap4  
Gimap6  
Gimap3  
Cd5  
Cd7  
Gm16617  
Tctex1d1  
Capn3  
Zdhhc8  
Ptrh1  
Xrcc6  
BC021614  
Pik3cd  
4932438H23Rik  
F2  
Slfn1  
2310007L24Rik  
Asb2  
Irf1  
Irf9  
Vim  
5430425J12Rik  
Fyn  
Ldlrad3  
Sema7a  
4930568K20Rik  
Gpr162  
Art1  
Zbtb7b  
Samhd1

Tnfaip8l2  
1700030A11Rik  
Shisa5  
Flt3l  
Paqr6  
Tmem20  
Grifin  
Rag2  
Rag1  
Hist1h2bp  
Tmem151b  
Bcl2  
Ilvbl  
Gimap8  
Gimap4  
Gimap3  
Atn1  
Cd4  
Cd5  
Cd7  
6430527G18Rik  
Tctex1d1  
Capn3  
Tesc  
Ptrh1  
Xrcc6  
BC021614  
Pik3cd  
Arid5a  
4932438H23Rik  
Gm11346  
Slfn1  
2310007L24Rik  
Scml4  
Runx3  
Irf1  
Irf7  
Irf9  
Vim  
Sp100  
Sema7a  
4930568K20Rik  
Gpr162  
Glipr2  
Lgals3bp  
Art1

**Supplementary Table 8. List of all the enriched/ depleted GO categories and immune-related GO categories among clusters depicted in Figure 5a. The log10 adjusted p-values are listed.**

**All the enriched GO categories**

|                                                        | Cluster 1                 |                                | Cluster 2                 |                                | Cluster 4                 |                                | Cluster 6                 |                                |
|--------------------------------------------------------|---------------------------|--------------------------------|---------------------------|--------------------------------|---------------------------|--------------------------------|---------------------------|--------------------------------|
|                                                        | log10<br>adj. p-<br>value | Enriched (1),<br>depleted (-1) |
| T cell differentiation in the thymus                   | -4,3279                   | 1                              | -2,3982                   | 1                              | 0                         | 0                              | 0                         | 0                              |
| T cell differentiation                                 | -3,6328                   | 1                              | -7,6655                   | 1                              | 0                         | 0                              | 0                         | 0                              |
| T cell activation                                      | -3,4307                   | 1                              | -14,227                   | 1                              | 0                         | 0                              | -1,4049                   | 1                              |
| hemopoietic or lymphoid organ development              | -3,4307                   | 1                              | -9,5935                   | 1                              | 0                         | 0                              | -1,7238                   | 1                              |
| lymphocyte differentiation                             | -3,3074                   | 1                              | -10,231                   | 1                              | 0                         | 0                              | -1,6415                   | 1                              |
| immune system development                              | -3,3034                   | 1                              | -10,611                   | 1                              | 0                         | 0                              | -1,7945                   | 1                              |
| positive regulation of leukocyte mediated immunity     | -2,5732                   | 1                              | 0                         | 0                              | 0                         | 0                              | 0                         | 0                              |
| positive regulation of lymphocyte mediated immunity    | -2,5732                   | 1                              | 0                         | 0                              | 0                         | 0                              | 0                         | 0                              |
| hemopoiesis                                            | -2,477                    | 1                              | -10,057                   | 1                              | 0                         | 0                              | -1,8885                   | 1                              |
| positive regulation of leukocyte mediated cytotoxicity | -2,4468                   | 1                              | 0                         | 0                              | 0                         | 0                              | -1,7334                   | 1                              |
| lymphocyte activation                                  | -2,4265                   | 1                              | -16,365                   | 1                              | 0                         | 0                              | -2,1007                   | 1                              |
| regulation of interleukin-2 biosynthetic process       | -2,4265                   | 1                              | -2,1499                   | 1                              | 0                         | 0                              | 0                         | 0                              |
| positive regulation of cell killing                    | -2,4265                   | 1                              | 0                         | 0                              | 0                         | 0                              | -1,5482                   | 1                              |
| leukocyte differentiation                              | -2,3826                   | 1                              | -11,08                    | 1                              | 0                         | 0                              | -1,4147                   | 1                              |
| thymic T cell selection                                | -2,3451                   | 1                              | -2,708                    | 1                              | 0                         | 0                              | 0                         | 0                              |
| interleukin-2 biosynthetic process                     | -2,3451                   | 1                              | -1,9031                   | 1                              | 0                         | 0                              | 0                         | 0                              |
| anchored to membrane                                   | -2,1821                   | 1                              | 0                         | 0                              | 0                         | 0                              | -1,4049                   | -1                             |
| cell activation                                        | -2,1269                   | 1                              | -16,126                   | 1                              | 0                         | 0                              | -2,2908                   | 1                              |
| T cell selection                                       | -2,1269                   | 1                              | -3,8745                   | 1                              | 0                         | 0                              | 0                         | 0                              |
| regulation of cytokine biosynthetic process            | -2,1269                   | 1                              | -2,3915                   | 1                              | 0                         | 0                              | 0                         | 0                              |
| regulation of interleukin-2 production                 | -2,1269                   | 1                              | -2,2057                   | 1                              | 0                         | 0                              | 0                         | 0                              |
| positive regulation of cytokine biosynthetic process   | -2,1269                   | 1                              | -2,0535                   | 1                              | 0                         | 0                              | 0                         | 0                              |
| regulation of leukocyte mediated cytotoxicity          | -2,1269                   | 1                              | 0                         | 0                              | 0                         | 0                              | -1,8039                   | 1                              |
| regulation of cell killing                             | -2,1269                   | 1                              | 0                         | 0                              | 0                         | 0                              | -1,648                    | 1                              |
| regulation of NK T cell activation                     | -2,1269                   | 1                              | 0                         | 0                              | 0                         | 0                              | 0                         | 0                              |
| positive regulation of NK T cell activation            | -2,1269                   | 1                              | 0                         | 0                              | 0                         | 0                              | 0                         | 0                              |
| NK T cell activation                                   | -2,1269                   | 1                              | 0                         | 0                              | 0                         | 0                              | 0                         | 0                              |
| positive regulation of immune effector process         | -2,1269                   | 1                              | 0                         | 0                              | 0                         | 0                              | 0                         | 0                              |

|                                                                       |         |   |         |   |         |   |         |   |
|-----------------------------------------------------------------------|---------|---|---------|---|---------|---|---------|---|
| leukocyte activation                                                  | -2,0971 | 1 | -16,222 | 1 | 0       | 0 | -2,3256 | 1 |
| positive regulation of interleukin-2 biosynthetic process             | -2,0971 | 1 | -3,0661 | 1 | 0       | 0 | 0       | 0 |
| V(D)J recombination                                                   | -2,0971 | 1 | 0       | 0 | 0       | 0 | 0       | 0 |
| positive regulation of apoptosis                                      | -1,9638 | 1 | -6,8794 | 1 | 0       | 0 | -1,7944 | 1 |
| cell proliferation                                                    | -1,9397 | 1 | -7,0035 | 1 | 0       | 0 | 0       | 0 |
| positive regulation of programmed cell death                          | -1,9397 | 1 | -6,7696 | 1 | 0       | 0 | -1,8726 | 1 |
| interleukin-2 production                                              | -1,9397 | 1 | -1,8398 | 1 | 0       | 0 | 0       | 0 |
| regulation of cell proliferation                                      | -1,9256 | 1 | -7,4949 | 1 | 0       | 0 | 0       | 0 |
| cytokine production                                                   | -1,9256 | 1 | -3,9288 | 1 | 0       | 0 | 0       | 0 |
| positive regulation of cell death                                     | -1,9209 | 1 | -6,5346 | 1 | 0       | 0 | -1,7463 | 1 |
| regulation of lymphocyte mediated immunity                            | -1,9209 | 1 | -1,5508 | 1 | 0       | 0 | -2,5053 | 1 |
| lymphocyte apoptosis                                                  | -1,9209 | 1 | 0       | 0 | 0       | 0 | -1,8296 | 1 |
| negative regulation of cell proliferation                             | -1,9082 | 1 | -2,6517 | 1 | 0       | 0 | 0       | 0 |
| cytokine biosynthetic process                                         | -1,8893 | 1 | -2,7838 | 1 | 0       | 0 | 0       | 0 |
| cytokine metabolic process                                            | -1,8893 | 1 | -2,7348 | 1 | 0       | 0 | 0       | 0 |
| lymphocyte mediated immunity                                          | -1,8893 | 1 | -2,1593 | 1 | 0       | 0 | -1,6897 | 1 |
| leukocyte mediated cytotoxicity                                       | -1,8893 | 1 | -1,5397 | 1 | 0       | 0 | -1,352  | 1 |
| interleukin-4 biosynthetic process                                    | -1,8893 | 1 | 0       | 0 | 0       | 0 | 0       | 0 |
| negative regulation of thymocyte apoptosis                            | -1,8893 | 1 | 0       | 0 | 0       | 0 | 0       | 0 |
| positive regulation of interleukin-4 biosynthetic process             | -1,8893 | 1 | 0       | 0 | 0       | 0 | 0       | 0 |
| pre-B cell allelic exclusion                                          | -1,8893 | 1 | 0       | 0 | 0       | 0 | 0       | 0 |
| regulation of interleukin-4 biosynthetic process                      | -1,8893 | 1 | 0       | 0 | 0       | 0 | 0       | 0 |
| transformed cell apoptosis                                            | -1,8893 | 1 | 0       | 0 | 0       | 0 | 0       | 0 |
| negative regulation of nerve growth factor receptor signaling pathway | -1,8893 | 1 | 0       | 0 | 0       | 0 | 0       | 0 |
| immune system process                                                 | -1,7996 | 1 | -17,807 | 1 | 0       | 0 | -2,1484 | 1 |
| regulation of leukocyte mediated immunity                             | -1,7704 | 1 | -1,3089 | 1 | 0       | 0 | -1,9967 | 1 |
| positive regulation of natural killer cell mediated cytotoxicity      | -1,7175 | 1 | 0       | 0 | 0       | 0 | 0       | 0 |
| positive regulation of natural killer cell mediated immunity          | -1,7175 | 1 | 0       | 0 | 0       | 0 | 0       | 0 |
| T cell apoptosis                                                      | -1,7175 | 1 | 0       | 0 | 0       | 0 | 0       | 0 |
| regulation of nerve growth factor receptor signaling pathway          | -1,647  | 1 | 0       | 0 | 0       | 0 | 0       | 0 |
| regulation of lymphocyte differentiation                              | -1,6012 | 1 | -2,5111 | 1 | 0       | 0 | 0       | 0 |
| regulation of lymphocyte activation                                   | -1,5401 | 1 | -7,3045 | 1 | -1,3788 | 1 | 0       | 0 |
| organ development                                                     | -1,5401 | 1 | -6,7696 | 1 | 0       | 0 | 0       | 0 |

|                                                              |         |   |         |   |   |   |         |   |
|--------------------------------------------------------------|---------|---|---------|---|---|---|---------|---|
| cell killing                                                 | -1,5401 | 1 | -2,3915 | 1 | 0 | 0 | -1,6896 | 1 |
| regulation of interferon-gamma production                    | -1,5401 | 1 | 0       | 0 | 0 | 0 | 0       | 0 |
| leukocyte mediated immunity                                  | -1,5378 | 1 | -2,4313 | 1 | 0 | 0 | 0       | 0 |
| regulation of apoptosis                                      | -1,5322 | 1 | -6,4012 | 1 | 0 | 0 | -1,3974 | 1 |
| regulation of cytokine production                            | -1,513  | 1 | -3,5351 | 1 | 0 | 0 | 0       | 0 |
| regulation of programmed cell death                          | -1,5096 | 1 | -6,4737 | 1 | 0 | 0 | -1,3809 | 1 |
| lipoprotein catabolic process                                | -1,5096 | 1 | 0       | 0 | 0 | 0 | 0       | 0 |
| thymocyte apoptosis                                          | -1,5096 | 1 | 0       | 0 | 0 | 0 | 0       | 0 |
| positive regulation of interferon-gamma biosynthetic process | -1,5096 | 1 | 0       | 0 | 0 | 0 | 0       | 0 |
| regulation of thymocyte apoptosis                            | -1,5096 | 1 | 0       | 0 | 0 | 0 | 0       | 0 |
| pro-B cell differentiation                                   | -1,5096 | 1 | 0       | 0 | 0 | 0 | 0       | 0 |
| induction of apoptosis                                       | -1,4741 | 1 | -5,8539 | 1 | 0 | 0 | -1,4049 | 1 |
| interferon-gamma production                                  | -1,4741 | 1 | 0       | 0 | 0 | 0 | 0       | 0 |
| induction of programmed cell death                           | -1,464  | 1 | -5,8041 | 1 | 0 | 0 | -1,5613 | 1 |
| B cell activation                                            | -1,4624 | 1 | -3,8594 | 1 | 0 | 0 | 0       | 0 |
| nicotinamide nucleotide metabolic process                    | -1,4624 | 1 | 0       | 0 | 0 | 0 | 0       | 0 |
| lymph node development                                       | -1,4624 | 1 | 0       | 0 | 0 | 0 | 0       | 0 |
| mitochondrial transport                                      | -1,4624 | 1 | 0       | 0 | 0 | 0 | 0       | 0 |
| regulation of cell death                                     | -1,4607 | 1 | -6,4634 | 1 | 0 | 0 | -1,4834 | 1 |
| pyridine nucleotide metabolic process                        | -1,434  | 1 | 0       | 0 | 0 | 0 | 0       | 0 |
| calcium- and calmodulin-dependent protein kinase complex     | -1,4208 | 1 | 0       | 0 | 0 | 0 | 0       | 0 |
| tumor necrosis factor receptor superfamily binding           | -1,4208 | 1 | 0       | 0 | 0 | 0 | 0       | 0 |
| immature B cell differentiation                              | -1,4208 | 1 | 0       | 0 | 0 | 0 | 0       | 0 |
| pre-B cell differentiation                                   | -1,4208 | 1 | 0       | 0 | 0 | 0 | 0       | 0 |
| negative regulation of T cell apoptosis                      | -1,4208 | 1 | 0       | 0 | 0 | 0 | 0       | 0 |
| regulation of leukocyte activation                           | -1,4106 | 1 | -6,342  | 1 | 0 | 0 | 0       | 0 |
| T cell homeostasis                                           | -1,3882 | 1 | 0       | 0 | 0 | 0 | 0       | 0 |
| regulation of natural killer cell mediated immunity          | -1,3882 | 1 | 0       | 0 | 0 | 0 | 0       | 0 |
| regulation of natural killer cell mediated cytotoxicity      | -1,3882 | 1 | 0       | 0 | 0 | 0 | 0       | 0 |
| immune effector process                                      | -1,3678 | 1 | -2,4653 | 1 | 0 | 0 | -1,6083 | 1 |
| regulation of cell activation                                | -1,3414 | 1 | -6,0022 | 1 | 0 | 0 | 0       | 0 |
| molecular adaptor activity                                   | -1,3414 | 1 | -1,4312 | 1 | 0 | 0 | 0       | 0 |
| system development                                           | -1,3361 | 1 | -7,8356 | 1 | 0 | 0 | 0       | 0 |
| gamma-delta T cell differentiation                           | -1,3287 | 1 | 0       | 0 | 0 | 0 | 0       | 0 |
| regulation of interferon-gamma biosynthetic process          | -1,3287 | 1 | 0       | 0 | 0 | 0 | 0       | 0 |

|                                                                                     |         |   |         |   |         |   |         |   |
|-------------------------------------------------------------------------------------|---------|---|---------|---|---------|---|---------|---|
| positive regulation of myoblast differentiation                                     | -1,3287 | 1 | 0       | 0 | 0       | 0 | 0       | 0 |
| gamma-delta T cell activation                                                       | -1,3287 | 1 | 0       | 0 | 0       | 0 | 0       | 0 |
| regulation of immune effector process                                               | -1,3059 | 1 | -1,7441 | 1 | 0       | 0 | 0       | 0 |
| regulation of cellular metabolic process                                            | 0       | 0 | -18,155 | 1 | 0       | 0 | -18,301 | 1 |
| cellular macromolecule metabolic process                                            | 0       | 0 | -17,839 | 1 | -10,73  | 1 | -37,021 | 1 |
| protein binding                                                                     | 0       | 0 | -17,827 | 1 | -1,5242 | 1 | -21,428 | 1 |
| regulation of nucleobase, nucleoside, nucleotide and nucleic acid metabolic process | 0       | 0 | -16,893 | 1 | 0       | 0 | -13,928 | 1 |
| regulation of nitrogen compound metabolic process                                   | 0       | 0 | -16,893 | 1 | 0       | 0 | -13,818 | 1 |
| intracellular regulation of cellular biosynthetic process                           | 0       | 0 | -16,71  | 1 | -29,676 | 1 | -53,987 | 1 |
| regulation of macromolecule metabolic process                                       | 0       | 0 | -16,71  | 1 | 0       | 0 | -14,588 | 1 |
| regulation of macromolecule biosynthetic process                                    | 0       | 0 | -16,365 | 1 | 0       | 0 | -19,116 | 1 |
| regulation of biosynthetic process                                                  | 0       | 0 | -16,365 | 1 | 0       | 0 | -16,646 | 1 |
| intracellular signaling pathway                                                     | 0       | 0 | -16,365 | 1 | 0       | 0 | -14,117 | 1 |
| regulation of metabolic process                                                     | 0       | 0 | -16,222 | 1 | 0       | 0 | -5,5735 | 1 |
| regulation of gene expression                                                       | 0       | 0 | -16,194 | 1 | 0       | 0 | -18,921 | 1 |
| regulation of primary metabolic process                                             | 0       | 0 | -15,921 | 1 | 0       | 0 | -18,118 | 1 |
| regulation of transcription                                                         | 0       | 0 | -15,889 | 1 | 0       | 0 | -17,772 | 1 |
| macromolecule biosynthetic process                                                  | 0       | 0 | -14,936 | 1 | -2,8636 | 1 | -27,052 | 1 |
| transcription                                                                       | 0       | 0 | -14,66  | 1 | 0       | 0 | -15     | 1 |
| positive regulation of biological process                                           | 0       | 0 | -14,599 | 1 | 0       | 0 | -1,8125 | 1 |
| cellular biosynthetic process                                                       | 0       | 0 | -14,521 | 1 | -4,1238 | 1 | -25,377 | 1 |
| positive regulation of cellular process                                             | 0       | 0 | -14,503 | 1 | 0       | 0 | -1,8604 | 1 |
| gene expression                                                                     | 0       | 0 | -14,45  | 1 | -3,8727 | 1 | -30,955 | 1 |
| intracellular part                                                                  | 0       | 0 | -14,338 | 1 | -29,644 | 1 | -52,492 | 1 |
| cellular macromolecule biosynthetic process                                         | 0       | 0 | -14,312 | 1 | -2,4631 | 1 | -27,587 | 1 |
| cellular metabolic process                                                          | 0       | 0 | -14,084 | 1 | -15,382 | 1 | -37,924 | 1 |
| biosynthetic process                                                                | 0       | 0 | -13,91  | 1 | -4,1586 | 1 | -23,79  | 1 |
| macromolecule metabolic process                                                     | 0       | 0 | -12,939 | 1 | -10,208 | 1 | -31,089 | 1 |
| nucleic acid metabolic process                                                      | 0       | 0 | -12,654 | 1 | -4,1238 | 1 | -19,635 | 1 |
| nucleus                                                                             | 0       | 0 | -12,535 | 1 | -9,8729 | 1 | -27,738 | 1 |
| organelle                                                                           | 0       | 0 | -12,41  | 1 | -23,604 | 1 | -44,523 | 1 |
| intracellular organelle                                                             | 0       | 0 | -12,108 | 1 | -23,854 | 1 | -44,288 | 1 |
| nucleobase, nucleoside, nucleotide and nucleic acid metabolic process               | 0       | 0 | -12,047 | 1 | -5,0458 | 1 | -21,09  | 1 |



|                                   |   |   |         |   |         |    |         |   |
|-----------------------------------|---|---|---------|---|---------|----|---------|---|
| primary metabolic process         | 0 | 0 | -10,821 | 1 | -12,644 | 1  | -29,343 | 1 |
| cellular nitrogen compound        |   |   |         |   |         |    |         |   |
| metabolic process                 | 0 | 0 | -10,564 | 1 | -5,0711 | 1  | -20,178 | 1 |
| binding                           | 0 | 0 | -10,55  | 1 | -7,0625 | 1  | -25,384 | 1 |
| intracellular signal transduction | 0 | 0 | -10,55  | 1 | 0       | 0  | -2,8996 | 1 |
| membrane-bounded organelle        | 0 | 0 | -10,509 | 1 | -26,57  | 1  | -44,62  | 1 |
| nitrogen compound metabolic       |   |   |         |   |         |    |         |   |
| process                           | 0 | 0 | -10,439 | 1 | -5,0458 | 1  | -19,413 | 1 |
| transcription regulator activity  | 0 | 0 | -10,431 | 1 | 0       | 0  | -3,0312 | 1 |
| regulation of RNA metabolic       |   |   |         |   |         |    |         |   |
| process                           | 0 | 0 | -10,318 | 1 | 0       | 0  | -3,0569 | 1 |
| intracellular membrane-           |   |   |         |   |         |    |         |   |
| bounded organelle                 | 0 | 0 | -10,123 | 1 | -26,209 | 1  | -44,545 | 1 |
| RNA metabolic process             | 0 | 0 | -9,9281 | 1 | -2,2083 | 1  | -7,2588 | 1 |
| cytoplasm                         | 0 | 0 | -9,8182 | 1 | -23,848 | 1  | -32,666 | 1 |
| regulation of transcription, DNA- |   |   |         |   |         |    |         |   |
| dependent                         | 0 | 0 | -9,58   | 1 | 0       | 0  | -2,6366 | 1 |
| immunological synapse             | 0 | 0 | -8,9586 | 1 | 0       | 0  | 0       | 0 |
| transcription, DNA-dependent      | 0 | 0 | -8,6615 | 1 | 0       | 0  | -3,0334 | 1 |
| regulation of immune system       |   |   |         |   |         |    |         |   |
| process                           | 0 | 0 | -8,5901 | 1 | 0       | 0  | -2,0957 | 1 |
| RNA biosynthetic process          | 0 | 0 | -8,58   | 1 | 0       | 0  | -2,9591 | 1 |
| metabolic process                 | 0 | 0 | -8,382  | 1 | -12,87  | 1  | -30,381 | 1 |
| positive regulation of cellular   |   |   |         |   |         |    |         |   |
| biosynthetic process              | 0 | 0 | -7,9666 | 1 | 0       | 0  | -2,5386 | 1 |
| regulation of signaling pathway   | 0 | 0 | -7,9666 | 1 | 0       | 0  | -1,6362 | 1 |
| regulation of transcription from  |   |   |         |   |         |    |         |   |
| RNA polymerase II promoter        | 0 | 0 | -7,8013 | 1 | 0       | 0  | -2,7726 | 1 |
| regulation of multicellular       |   |   |         |   |         |    |         |   |
| organismal process                | 0 | 0 | -7,7747 | 1 | 0       | 0  | 0       | 0 |
| regulation of T cell activation   | 0 | 0 | -7,7399 | 1 | 0       | 0  | 0       | 0 |
| positive regulation of nitrogen   |   |   |         |   |         |    |         |   |
| compound metabolic process        | 0 | 0 | -7,7352 | 1 | 0       | 0  | -2,3216 | 1 |
| programmed cell death             | 0 | 0 | -7,6655 | 1 | 0       | 0  | -2,4763 | 1 |
| positive regulation of            |   |   |         |   |         |    |         |   |
| biosynthetic process              | 0 | 0 | -7,6655 | 1 | 0       | 0  | -2,4763 | 1 |
| regulation of cellular process    | 0 | 0 | -7,6402 | 1 | -3,8026 | -1 | 0       | 0 |
| apoptosis                         | 0 | 0 | -7,6364 | 1 | 0       | 0  | -2,2908 | 1 |
| positive regulation of            |   |   |         |   |         |    |         |   |
| nucleobase, nucleoside,           |   |   |         |   |         |    |         |   |
| nucleotide and nucleic acid       |   |   |         |   |         |    |         |   |
| metabolic process                 | 0 | 0 | -7,6216 | 1 | 0       | 0  | -2,2741 | 1 |
| negative regulation of biological |   |   |         |   |         |    |         |   |
| process                           | 0 | 0 | -7,5058 | 1 | 0       | 0  | -3,8066 | 1 |
| cell death                        | 0 | 0 | -7,4949 | 1 | 0       | 0  | -2,3232 | 1 |
| negative regulation of cellular   |   |   |         |   |         |    |         |   |
| process                           | 0 | 0 | -7,4921 | 1 | 0       | 0  | -3,7002 | 1 |
| death                             | 0 | 0 | -7,382  | 1 | 0       | 0  | -2,2542 | 1 |
| regulation of developmental       |   |   |         |   |         |    |         |   |
| process                           | 0 | 0 | -7,3536 | 1 | 0       | 0  | 0       | 0 |
| positive regulation of cellular   |   |   |         |   |         |    |         |   |
| metabolic process                 | 0 | 0 | -7,2765 | 1 | 0       | 0  | -4,262  | 1 |

|                                                            |   |   |         |   |         |    |         |    |
|------------------------------------------------------------|---|---|---------|---|---------|----|---------|----|
| transcription from RNA polymerase II promoter              | 0 | 0 | -7,118  | 1 | 0       | 0  | -3,5981 | 1  |
| cell part                                                  | 0 | 0 | -7,1051 | 1 | -5,9957 | 1  | -11,376 | 1  |
| cell                                                       | 0 | 0 | -7,1007 | 1 | -5,9957 | 1  | -11,365 | 1  |
| developmental process                                      | 0 | 0 | -7,0357 | 1 | 0       | 0  | 0       | 0  |
| regulation of biological process                           | 0 | 0 | -7,0128 | 1 | -2,7202 | -1 | 0       | 0  |
| positive regulation of metabolic process                   | 0 | 0 | -6,9281 | 1 | 0       | 0  | -4,0297 | 1  |
| positive regulation of macromolecule metabolic process     | 0 | 0 | -6,9136 | 1 | 0       | 0  | -4,6819 | 1  |
| transcription factor activity                              | 0 | 0 | -6,9136 | 1 | 0       | 0  | 0       | 0  |
| phosphate metabolic process                                | 0 | 0 | -6,8477 | 1 | 0       | 0  | -4,7905 | 1  |
| phosphorus metabolic process                               | 0 | 0 | -6,8097 | 1 | 0       | 0  | -4,7423 | 1  |
| biological regulation                                      | 0 | 0 | -6,8013 | 1 | -2,2346 | -1 | 0       | 0  |
| positive regulation of macromolecule biosynthetic process  | 0 | 0 | -6,7595 | 1 | 0       | 0  | -2,7399 | 1  |
| multicellular organismal development                       | 0 | 0 | -6,6055 | 1 | 0       | 0  | 0       | 0  |
| anatomical structure development                           | 0 | 0 | -6,5935 | 1 | 0       | 0  | 0       | 0  |
| positive regulation of T cell activation                   | 0 | 0 | -6,5607 | 1 | -1,4457 | 1  | 0       | 0  |
| positive regulation of transcription                       | 0 | 0 | -6,5157 | 1 | 0       | 0  | -2,2253 | 1  |
| negative regulation of cellular biosynthetic process       | 0 | 0 | -6,5157 | 1 | 0       | 0  | -2,1496 | 1  |
| positive regulation of gene expression                     | 0 | 0 | -6,4634 | 1 | 0       | 0  | -2,4755 | 1  |
| negative regulation of transcription                       | 0 | 0 | -6,4425 | 1 | 0       | 0  | -2,0453 | 1  |
| positive regulation of immune system process               | 0 | 0 | -6,4012 | 1 | 0       | 0  | -1,9232 | 1  |
| negative regulation of nitrogen compound metabolic process | 0 | 0 | -6,3224 | 1 | 0       | 0  | -2,298  | 1  |
| negative regulation of biosynthetic process                | 0 | 0 | -6,3179 | 1 | 0       | 0  | -2,0013 | 1  |
| negative regulation of cellular metabolic process          | 0 | 0 | -6,3134 | 1 | 0       | 0  | -3,1826 | 1  |
| cellular developmental process                             | 0 | 0 | -6,3072 | 1 | 0       | 0  | -1,3027 | -1 |
| cell differentiation                                       | 0 | 0 | -6,2457 | 1 | 0       | 0  | 0       | 0  |
| negative regulation of macromolecule biosynthetic process  | 0 | 0 | -6,2248 | 1 | 0       | 0  | -1,8431 | 1  |
| negative regulation of gene expression                     | 0 | 0 | -6,1624 | 1 | 0       | 0  | -3,1182 | 1  |
| positive regulation of lymphocyte activation               | 0 | 0 | -5,9586 | 1 | -1,3036 | 1  | 0       | 0  |
| small GTPase mediated signal transduction                  | 0 | 0 | -5,9208 | 1 | 0       | 0  | -2,8501 | 1  |

|                                                                                              |   |   |         |   |         |   |         |   |
|----------------------------------------------------------------------------------------------|---|---|---------|---|---------|---|---------|---|
| negative regulation of nucleobase, nucleoside, nucleotide and nucleic acid metabolic process | 0 | 0 | -5,8539 | 1 | 0       | 0 | -2,1638 | 1 |
| cellular process                                                                             | 0 | 0 | -5,821  | 1 | 0       | 0 | -9,0894 | 1 |
| actin cytoskeleton organization                                                              | 0 | 0 | -5,7959 | 1 | 0       | 0 | 0       | 0 |
| negative regulation of metabolic process                                                     | 0 | 0 | -5,7077 | 1 | 0       | 0 | -3,7154 | 1 |
| actin filament-based process                                                                 | 0 | 0 | -5,7077 | 1 | 0       | 0 | 0       | 0 |
| regulation of cellular component movement                                                    | 0 | 0 | -5,6308 | 1 | 0       | 0 | 0       | 0 |
| negative regulation of macromolecule metabolic process                                       | 0 | 0 | -5,6234 | 1 | 0       | 0 | -3,8564 | 1 |
| positive regulation of leukocyte activation                                                  | 0 | 0 | -5,5171 | 1 | -1,3433 | 1 | 0       | 0 |
| positive regulation of cell proliferation                                                    | 0 | 0 | -5,4572 | 1 | 0       | 0 | 0       | 0 |
| cellular protein metabolic process                                                           | 0 | 0 | -5,3862 | 1 | -7,382  | 1 | -18,866 | 1 |
| regulation of locomotion                                                                     | 0 | 0 | -5,3862 | 1 | 0       | 0 | 0       | 0 |
| regulation of cell migration                                                                 | 0 | 0 | -5,3851 | 1 | 0       | 0 | 0       | 0 |
| regulation of signal transduction                                                            | 0 | 0 | -5,2916 | 1 | 0       | 0 | -2,2483 | 1 |
| transcription repressor activity                                                             | 0 | 0 | -5,2807 | 1 | 0       | 0 | -2,1129 | 1 |
| positive regulation of cell activation                                                       | 0 | 0 | -5,1694 | 1 | -1,4169 | 1 | 0       | 0 |
| regulation of signaling process                                                              | 0 | 0 | -5,1013 | 1 | 0       | 0 | -2,0957 | 1 |
| intracellular protein kinase cascade                                                         | 0 | 0 | -5,0926 | 1 | 0       | 0 | -1,8125 | 1 |
| signal transmission via phosphorylation event                                                | 0 | 0 | -5,0926 | 1 | 0       | 0 | -1,8125 | 1 |
| protein modification process                                                                 | 0 | 0 | -4,9066 | 1 | -2,029  | 1 | -8,2644 | 1 |
| phosphorylation                                                                              | 0 | 0 | -4,7825 | 1 | 0       | 0 | -4,2104 | 1 |
| T cell proliferation                                                                         | 0 | 0 | -4,7545 | 1 | 0       | 0 | 0       | 0 |
| actin filament organization                                                                  | 0 | 0 | -4,7144 | 1 | 0       | 0 | 0       | 0 |
| chromatin binding                                                                            | 0 | 0 | -4,699  | 1 | 0       | 0 | -2,3803 | 1 |
| negative regulation of transcription, DNA-dependent                                          | 0 | 0 | -4,6861 | 1 | 0       | 0 | -1,4177 | 1 |
| alpha-beta T cell activation                                                                 | 0 | 0 | -4,6234 | 1 | 0       | 0 | 0       | 0 |
| cytoskeleton organization                                                                    | 0 | 0 | -4,5935 | 1 | 0       | 0 | 0       | 0 |
| negative regulation of RNA metabolic process                                                 | 0 | 0 | -4,5918 | 1 | 0       | 0 | -1,6601 | 1 |
| post-translational protein modification                                                      | 0 | 0 | -4,5467 | 1 | 0       | 0 | -7,2958 | 1 |
| Ras protein signal transduction                                                              | 0 | 0 | -4,5114 | 1 | 0       | 0 | 0       | 0 |
| regulation of cell differentiation                                                           | 0 | 0 | -4,4949 | 1 | 0       | 0 | 0       | 0 |
| cell surface regulation of cell                                                              | 0 | 0 | -4,4547 | 1 | 0       | 0 | 0       | 0 |
| communication                                                                                | 0 | 0 | -4,3925 | 1 | 0       | 0 | 0       | 0 |
| DNA binding                                                                                  | 0 | 0 | -4,3716 | 1 | 0       | 0 | -6,699  | 1 |

|                                                                      |   |   |         |   |         |   |         |   |
|----------------------------------------------------------------------|---|---|---------|---|---------|---|---------|---|
| negative regulation of transcription from RNA polymerase II promoter | 0 | 0 | -4,3152 | 1 | 0       | 0 | 0       | 0 |
| positive regulation of developmental process                         | 0 | 0 | -4,3054 | 1 | 0       | 0 | 0       | 0 |
| macromolecule modification                                           | 0 | 0 | -4,279  | 1 | -2,2321 | 1 | -8,699  | 1 |
| positive regulation of transcription from RNA polymerase II promoter | 0 | 0 | -4,2069 | 1 | 0       | 0 | -1,7853 | 1 |
| cytosol                                                              | 0 | 0 | -4,1904 | 1 | 0       | 0 | -5,0039 | 1 |
| mononuclear cell proliferation                                       | 0 | 0 | -4,1506 | 1 | 0       | 0 | -1,334  | 1 |
| lymphocyte proliferation                                             | 0 | 0 | -4,1506 | 1 | 0       | 0 | -1,334  | 1 |
| cytokine binding                                                     | 0 | 0 | -4,1226 | 1 | 0       | 0 | 0       | 0 |
| alpha-beta T cell differentiation                                    | 0 | 0 | -4,0799 | 1 | 0       | 0 | 0       | 0 |
| positive regulation of transcription, DNA-dependent                  | 0 | 0 | -4,0259 | 1 | 0       | 0 | -2,0798 | 1 |
| leukocyte proliferation                                              | 0 | 0 | -3,994  | 1 | 0       | 0 | 0       | 0 |
| positive regulation of RNA metabolic process                         | 0 | 0 | -3,9518 | 1 | 0       | 0 | -2,3216 | 1 |
| protein amino acid phosphorylation                                   | 0 | 0 | -3,9304 | 1 | 0       | 0 | -2,739  | 1 |
| regulation of response to stimulus                                   | 0 | 0 | -3,9044 | 1 | 0       | 0 | 0       | 0 |
| GTPase activity                                                      | 0 | 0 | -3,8477 | 1 | 0       | 0 | 0       | 0 |
| external side of plasma membrane                                     | 0 | 0 | -3,8298 | 1 | 0       | 0 | 0       | 0 |
| T cell receptor complex                                              | 0 | 0 | -3,7161 | 1 | 0       | 0 | 0       | 0 |
| regulation of small GTPase mediated signal transduction              | 0 | 0 | -3,714  | 1 | 0       | 0 | 0       | 0 |
| MAP kinase tyrosine/serine/threonine phosphatase activity            | 0 | 0 | -3,6884 | 1 | 0       | 0 | 0       | 0 |
| regulation of T cell receptor signaling pathway                      | 0 | 0 | -3,6884 | 1 | 0       | 0 | 0       | 0 |
| MAP kinase phosphatase activity                                      | 0 | 0 | -3,6884 | 1 | 0       | 0 | 0       | 0 |
| peptidyl-tyrosine phosphorylation                                    | 0 | 0 | -3,6715 | 1 | 0       | 0 | 0       | 0 |
| peptidyl-tyrosine modification                                       | 0 | 0 | -3,6715 | 1 | 0       | 0 | 0       | 0 |
| B cell differentiation                                               | 0 | 0 | -3,6677 | 1 | 0       | 0 | -1,4633 | 1 |
| regulation of immune response                                        | 0 | 0 | -3,6443 | 1 | 0       | 0 | -2,4763 | 1 |
| cytoskeletal protein binding                                         | 0 | 0 | -3,6079 | 1 | 0       | 0 | 0       | 0 |
| regulation of phosphorylation                                        | 0 | 0 | -3,5954 | 1 | 0       | 0 | 0       | 0 |
| T cell receptor signaling pathway                                    | 0 | 0 | -3,5757 | 1 | 0       | 0 | 0       | 0 |
| nucleic acid binding                                                 | 0 | 0 | -3,5692 | 1 | -4,0168 | 1 | -17,11  | 1 |
| regulation of phosphate metabolic process                            | 0 | 0 | -3,528  | 1 | 0       | 0 | 0       | 0 |
| regulation of phosphorus metabolic process                           | 0 | 0 | -3,528  | 1 | 0       | 0 | 0       | 0 |
| regulation of myeloid cell differentiation                           | 0 | 0 | -3,5142 | 1 | 0       | 0 | 0       | 0 |
| response to stimulus                                                 | 0 | 0 | -3,5092 | 1 | 0       | 0 | 0       | 0 |

|                                                           |   |   |         |   |         |   |         |   |
|-----------------------------------------------------------|---|---|---------|---|---------|---|---------|---|
| cell migration                                            | 0 | 0 | -3,5067 | 1 | 0       | 0 | 0       | 0 |
| cellular component movement                               | 0 | 0 | -3,5035 | 1 | 0       | 0 | 0       | 0 |
| regulation of molecular function                          | 0 | 0 | -3,4769 | 1 | 0       | 0 | -1,7853 | 1 |
| endosome                                                  | 0 | 0 | -3,326  | 1 | 0       | 0 | 0       | 0 |
| regulation of catalytic activity                          | 0 | 0 | -3,3106 | 1 | 0       | 0 | 0       | 0 |
| protein kinase binding                                    | 0 | 0 | -3,3063 | 1 | 0       | 0 | -1,8122 | 1 |
| kinase binding                                            | 0 | 0 | -3,2659 | 1 | 0       | 0 | -1,9176 | 1 |
| immune response-activating signal transduction            | 0 | 0 | -3,2524 | 1 | 0       | 0 | -1,9539 | 1 |
| sequence-specific DNA binding                             | 0 | 0 | -3,2454 | 1 | 0       | 0 | 0       | 0 |
| negative regulation of cell communication                 | 0 | 0 | -3,2297 | 1 | 0       | 0 | 0       | 0 |
| positive regulation of T cell proliferation               | 0 | 0 | -3,2284 | 1 | 0       | 0 | 0       | 0 |
| regulation of antigen receptor-mediated signaling pathway | 0 | 0 | -3,2186 | 1 | 0       | 0 | 0       | 0 |
| alpha-beta T cell receptor complex                        | 0 | 0 | -3,1469 | 1 | 0       | 0 | 0       | 0 |
| regulation of T cell proliferation                        | 0 | 0 | -3,142  | 1 | 0       | 0 | 0       | 0 |
| antigen receptor-mediated signaling pathway               | 0 | 0 | -3,1309 | 1 | 0       | 0 | -2,7911 | 1 |
| response to stress                                        | 0 | 0 | -3,1265 | 1 | 0       | 0 | 0       | 0 |
| negative regulation of signaling pathway                  | 0 | 0 | -3,115  | 1 | 0       | 0 | 0       | 0 |
| positive regulation of cytoskeleton organization          | 0 | 0 | -3,1086 | 1 | 0       | 0 | 0       | 0 |
| nucleoplasm                                               | 0 | 0 | -3,0826 | 1 | 0       | 0 | -7,2277 | 1 |
| cellular component organization                           | 0 | 0 | -3,0728 | 1 | -1,6419 | 1 | -2,0473 | 1 |
| regulation of actin filament-based process                | 0 | 0 | -3,0674 | 1 | 0       | 0 | 0       | 0 |
| cellular component assembly                               | 0 | 0 | -3,0574 | 1 | 0       | 0 | -1,6594 | 1 |
| myeloid cell differentiation                              | 0 | 0 | -3,0476 | 1 | 0       | 0 | -1,3057 | 1 |
| GTPase regulator activity                                 | 0 | 0 | -3,0273 | 1 | 0       | 0 | 0       | 0 |
| nuclear lumen                                             | 0 | 0 | -3,0213 | 1 | 0       | 0 | -11,417 | 1 |
| positive regulation of alpha-beta T cell activation       | 0 | 0 | -3,0213 | 1 | 0       | 0 | 0       | 0 |
| immune response-regulating signaling pathway              | 0 | 0 | -3,0132 | 1 | 0       | 0 | -2,3854 | 1 |
| immune response                                           | 0 | 0 | -3,0084 | 1 | 0       | 0 | -2,1422 | 1 |
| membrane raft                                             | 0 | 0 | -2,9966 | 1 | 0       | 0 | 0       | 0 |
| negative regulation of developmental process              | 0 | 0 | -2,9966 | 1 | 0       | 0 | 0       | 0 |
| transcription factor binding                              | 0 | 0 | -2,9873 | 1 | 0       | 0 | -5,4202 | 1 |
| regulation of epidermis development                       | 0 | 0 | -2,9801 | 1 | 0       | 0 | 0       | 0 |
| RNA splicing                                              | 0 | 0 | -2,9546 | 1 | -1,7362 | 1 | -3,1649 | 1 |
| positive regulation of mononuclear cell proliferation     | 0 | 0 | -2,9177 | 1 | 0       | 0 | 0       | 0 |
| calcium-mediated signaling                                | 0 | 0 | -2,9177 | 1 | 0       | 0 | 0       | 0 |
| regulation of alpha-beta T cell activation                | 0 | 0 | -2,9177 | 1 | 0       | 0 | 0       | 0 |

|                                                                    |   |   |         |   |   |   |         |   |
|--------------------------------------------------------------------|---|---|---------|---|---|---|---------|---|
| positive regulation of organelle organization                      | 0 | 0 | -2,9177 | 1 | 0 | 0 | 0       | 0 |
| positive regulation of lymphocyte proliferation                    | 0 | 0 | -2,9177 | 1 | 0 | 0 | 0       | 0 |
| nucleoside-triphosphatase regulator activity                       | 0 | 0 | -2,8938 | 1 | 0 | 0 | 0       | 0 |
| negative regulation of cellular component movement                 | 0 | 0 | -2,8863 | 1 | 0 | 0 | 0       | 0 |
| negative regulation of locomotion                                  | 0 | 0 | -2,8863 | 1 | 0 | 0 | 0       | 0 |
| phosphoprotein phosphatase activity                                | 0 | 0 | -2,8626 | 1 | 0 | 0 | -1,7767 | 1 |
| positive regulation of cellular component movement                 | 0 | 0 | -2,8523 | 1 | 0 | 0 | 0       | 0 |
| positive regulation of locomotion                                  | 0 | 0 | -2,8523 | 1 | 0 | 0 | 0       | 0 |
| transcription activator activity                                   | 0 | 0 | -2,8491 | 1 | 0 | 0 | -2,9654 | 1 |
| protein amino acid dephosphorylation                               | 0 | 0 | -2,8491 | 1 | 0 | 0 | 0       | 0 |
| actin binding                                                      | 0 | 0 | -2,8487 | 1 | 0 | 0 | 0       | 0 |
| regulation of protein modification process                         | 0 | 0 | -2,7923 | 1 | 0 | 0 | 0       | 0 |
| positive regulation of leukocyte proliferation                     | 0 | 0 | -2,788  | 1 | 0 | 0 | 0       | 0 |
| enzyme regulator activity                                          | 0 | 0 | -2,7833 | 1 | 0 | 0 | 0       | 0 |
| response to wounding                                               | 0 | 0 | -2,7833 | 1 | 0 | 0 | 0       | 0 |
| cell communication                                                 | 0 | 0 | -2,779  | 1 | 0 | 0 | 0       | 0 |
| regulation of mononuclear cell proliferation                       | 0 | 0 | -2,7758 | 1 | 0 | 0 | 0       | 0 |
| regulation of lymphocyte proliferation                             | 0 | 0 | -2,7758 | 1 | 0 | 0 | 0       | 0 |
| negative regulation of T cell receptor signaling pathway           | 0 | 0 | -2,7728 | 1 | 0 | 0 | 0       | 0 |
| negative regulation of antigen receptor-mediated signaling pathway | 0 | 0 | -2,7728 | 1 | 0 | 0 | 0       | 0 |
| nucleoplasm part                                                   | 0 | 0 | -2,7348 | 1 | 0 | 0 | -6,091  | 1 |
| regulation of actin cytoskeleton organization                      | 0 | 0 | -2,7348 | 1 | 0 | 0 | 0       | 0 |
| positive regulation of cell migration                              | 0 | 0 | -2,7292 | 1 | 0 | 0 | 0       | 0 |
| dephosphorylation                                                  | 0 | 0 | -2,703  | 1 | 0 | 0 | 0       | 0 |
| regulation of cellular protein metabolic process                   | 0 | 0 | -2,685  | 1 | 0 | 0 | -3,921  | 1 |
| MHC class I peptide loading complex                                | 0 | 0 | -2,685  | 1 | 0 | 0 | 0       | 0 |
| regulation of leukocyte proliferation                              | 0 | 0 | -2,685  | 1 | 0 | 0 | 0       | 0 |
| Rho protein signal transduction                                    | 0 | 0 | -2,685  | 1 | 0 | 0 | 0       | 0 |
| fully spanning the plasma membrane                                 | 0 | 0 | -2,685  | 1 | 0 | 0 | 0       | 0 |
| localization of cell                                               | 0 | 0 | -2,6594 | 1 | 0 | 0 | 0       | 0 |
| cell motility                                                      | 0 | 0 | -2,6594 | 1 | 0 | 0 | 0       | 0 |
| protein dimerization activity                                      | 0 | 0 | -2,64   | 1 | 0 | 0 | 0       | 0 |

|                                                                    |   |   |         |   |         |   |         |   |
|--------------------------------------------------------------------|---|---|---------|---|---------|---|---------|---|
| cellular defense response                                          | 0 | 0 | -2,6351 | 1 | 0       | 0 | 0       | 0 |
| cellular component biogenesis                                      | 0 | 0 | -2,6338 | 1 | 0       | 0 | -2,4835 | 1 |
| organelle organization                                             | 0 | 0 | -2,6328 | 1 | -2,4374 | 1 | -5,8761 | 1 |
| positive regulation of immune response                             | 0 | 0 | -2,6328 | 1 | 0       | 0 | -2,4758 | 1 |
| positive regulation of response to stimulus                        | 0 | 0 | -2,6328 | 1 | 0       | 0 | -1,5541 | 1 |
| enzyme binding                                                     | 0 | 0 | -2,6326 | 1 | 0       | 0 | -2,6892 | 1 |
| response to external stimulus                                      | 0 | 0 | -2,6293 | 1 | 0       | 0 | 0       | 0 |
| peptidyl-amino acid modification                                   | 0 | 0 | -2,6051 | 1 | 0       | 0 | -3,173  | 1 |
| locomotion                                                         | 0 | 0 | -2,6013 | 1 | 0       | 0 | 0       | 0 |
| non-membrane spanning protein tyrosine kinase activity             | 0 | 0 | -2,5964 | 1 | 0       | 0 | 0       | 0 |
| negative regulation of cell migration                              | 0 | 0 | -2,5964 | 1 | 0       | 0 | 0       | 0 |
| cell cycle                                                         | 0 | 0 | -2,5871 | 1 | -1,5242 | 1 | -1,3947 | 1 |
| PML body                                                           | 0 | 0 | -2,5784 | 1 | 0       | 0 | 0       | 0 |
| regulation of Ras protein signal transduction                      | 0 | 0 | -2,5751 | 1 | 0       | 0 | 0       | 0 |
| positive regulation of cell differentiation                        | 0 | 0 | -2,5612 | 1 | 0       | 0 | 0       | 0 |
| immune response-activating cell surface receptor signaling pathway | 0 | 0 | -2,5341 | 1 | 0       | 0 | -2,0443 | 1 |
| regulation of T cell differentiation                               | 0 | 0 | -2,5341 | 1 | 0       | 0 | 0       | 0 |
| negative regulation of myeloid cell differentiation                | 0 | 0 | -2,5164 | 1 | 0       | 0 | 0       | 0 |
| negative regulation of cell differentiation                        | 0 | 0 | -2,5096 | 1 | 0       | 0 | 0       | 0 |
| intracellular organelle lumen                                      | 0 | 0 | -2,5021 | 1 | -2,4631 | 1 | -12,167 | 1 |
| positive regulation of epidermis development                       | 0 | 0 | -2,4859 | 1 | 0       | 0 | 0       | 0 |
| protein domain specific binding                                    | 0 | 0 | -2,4859 | 1 | 0       | 0 | 0       | 0 |
| enzyme activator activity                                          | 0 | 0 | -2,4554 | 1 | 0       | 0 | 0       | 0 |
| organelle lumen                                                    | 0 | 0 | -2,4413 | 1 | -2,3745 | 1 | -11,947 | 1 |
| negative regulation of signal transduction                         | 0 | 0 | -2,4181 | 1 | 0       | 0 | 0       | 0 |
| phosphotransferase activity, alcohol group as acceptor             | 0 | 0 | -2,4154 | 1 | 0       | 0 | -2,5053 | 1 |
| negative regulation of signaling process                           | 0 | 0 | -2,3724 | 1 | 0       | 0 | 0       | 0 |
| kinase activity                                                    | 0 | 0 | -2,364  | 1 | 0       | 0 | -3,1204 | 1 |
| cell-matrix adhesion                                               | 0 | 0 | -2,3488 | 1 | 0       | 0 | 0       | 0 |
| nuclear part                                                       | 0 | 0 | -2,3334 | 1 | -2,8778 | 1 | -12,812 | 1 |
| immune response-regulating cell surface receptor signaling pathway | 0 | 0 | -2,3334 | 1 | 0       | 0 | -2,2149 | 1 |
| signal initiation by diffusible mediator                           | 0 | 0 | -2,333  | 1 | 0       | 0 | -1,648  | 1 |
| initiation of signal transduction                                  | 0 | 0 | -2,333  | 1 | 0       | 0 | -1,648  | 1 |

|                                                                                                 |   |   |         |   |         |   |         |   |
|-------------------------------------------------------------------------------------------------|---|---|---------|---|---------|---|---------|---|
| cytokine-mediated signaling pathway                                                             | 0 | 0 | -2,333  | 1 | 0       | 0 | -1,648  | 1 |
| signal initiation by protein/peptide mediator receptor complex                                  | 0 | 0 | -2,333  | 1 | 0       | 0 | -1,648  | 1 |
| positive regulation of alpha-beta T cell differentiation                                        | 0 | 0 | -2,3266 | 1 | 0       | 0 | 0       | 0 |
| regulation of actin filament bundle assembly                                                    | 0 | 0 | -2,3266 | 1 | 0       | 0 | 0       | 0 |
| specific RNA polymerase II transcription factor activity                                        | 0 | 0 | -2,3266 | 1 | 0       | 0 | 0       | 0 |
| phosphatase activity                                                                            | 0 | 0 | -2,308  | 1 | 0       | 0 | -2,0764 | 1 |
| myeloid leukocyte differentiation                                                               | 0 | 0 | -2,3055 | 1 | 0       | 0 | 0       | 0 |
| positive regulation of T cell differentiation                                                   | 0 | 0 | -2,2867 | 1 | 0       | 0 | 0       | 0 |
| regulation of transmembrane receptor protein serine/threonine kinase signaling pathway          | 0 | 0 | -2,2834 | 1 | 0       | 0 | 0       | 0 |
| regulation of localization                                                                      | 0 | 0 | -2,231  | 1 | 0       | 0 | 0       | 0 |
| regulation of cell cycle                                                                        | 0 | 0 | -2,2293 | 1 | 0       | 0 | -1,8125 | 1 |
| positive regulation of molecular function                                                       | 0 | 0 | -2,2113 | 1 | 0       | 0 | -1,6311 | 1 |
| nucleotide binding                                                                              | 0 | 0 | -2,2091 | 1 | -2,6495 | 1 | -5,6402 | 1 |
| actin filament bundle assembly                                                                  | 0 | 0 | -2,2057 | 1 | 0       | 0 | 0       | 0 |
| membrane-enclosed lumen                                                                         | 0 | 0 | -2,2047 | 1 | -2,9601 | 1 | -11,939 | 1 |
| positive regulation of interleukin-4 production                                                 | 0 | 0 | -2,1949 | 1 | 0       | 0 | 0       | 0 |
| non-membrane-bounded organelle                                                                  | 0 | 0 | -2,187  | 1 | 0       | 0 | -3,184  | 1 |
| intracellular non-membrane-bounded organelle                                                    | 0 | 0 | -2,187  | 1 | 0       | 0 | -3,184  | 1 |
| regulation of defense response                                                                  | 0 | 0 | -2,1685 | 1 | 0       | 0 | 0       | 0 |
| actin cytoskeleton                                                                              | 0 | 0 | -2,1495 | 1 | 0       | 0 | 0       | 0 |
| regulation of transforming growth factor beta receptor signaling pathway                        | 0 | 0 | -2,1339 | 1 | 0       | 0 | 0       | 0 |
| negative regulation of transmembrane receptor protein serine/threonine kinase signaling pathway | 0 | 0 | -2,1331 | 1 | 0       | 0 | 0       | 0 |
| positive regulation of lymphocyte differentiation                                               | 0 | 0 | -2,1331 | 1 | 0       | 0 | 0       | 0 |
| response to chemical stimulus                                                                   | 0 | 0 | -2,109  | 1 | 0       | 0 | 0       | 0 |
| cellular macromolecular complex assembly                                                        | 0 | 0 | -2,0671 | 1 | 0       | 0 | 0       | 0 |
| structure-specific DNA binding                                                                  | 0 | 0 | -2,0528 | 1 | 0       | 0 | -2,0007 | 1 |
| guanyl-nucleotide exchange factor activity                                                      | 0 | 0 | -2,0528 | 1 | 0       | 0 | 0       | 0 |
| regulation of immunoglobulin production                                                         | 0 | 0 | -2,0461 | 1 | 0       | 0 | 0       | 0 |
| transcription cofactor activity                                                                 | 0 | 0 | -2,0426 | 1 | 0       | 0 | -2,3777 | 1 |



|                                                                                                                           |   |   |         |   |         |    |         |    |
|---------------------------------------------------------------------------------------------------------------------------|---|---|---------|---|---------|----|---------|----|
| vasculature development                                                                                                   | 0 | 0 | -2,0426 | 1 | 0       | 0  | 0       | 0  |
| negative thymic T cell selection                                                                                          | 0 | 0 | -2,0402 | 1 | 0       | 0  | 0       | 0  |
| regulation of kinase activity                                                                                             | 0 | 0 | -2,025  | 1 | 0       | 0  | 0       | 0  |
| regulation of ossification                                                                                                | 0 | 0 | -2,011  | 1 | 0       | 0  | 0       | 0  |
| plasma membrane                                                                                                           | 0 | 0 | -2,0086 | 1 | -1,5927 | -1 | -1,8726 | -1 |
| cellular macromolecule catabolic process                                                                                  | 0 | 0 | -2,001  | 1 | 0       | 0  | -2,2529 | 1  |
| regulation of alpha-beta T cell differentiation                                                                           | 0 | 0 | -1,9973 | 1 | 0       | 0  | 0       | 0  |
| regulation of protein amino acid phosphorylation                                                                          | 0 | 0 | -1,9958 | 1 | 0       | 0  | 0       | 0  |
| transmembrane receptor protein serine/threonine kinase signaling pathway                                                  | 0 | 0 | -1,9926 | 1 | 0       | 0  | 0       | 0  |
| cellular protein complex assembly                                                                                         | 0 | 0 | -1,9926 | 1 | 0       | 0  | 0       | 0  |
| regulation of binding                                                                                                     | 0 | 0 | -1,991  | 1 | 0       | 0  | -3,9909 | 1  |
| blood vessel development                                                                                                  | 0 | 0 | -1,9901 | 1 | 0       | 0  | 0       | 0  |
| regulation of protein kinase activity                                                                                     | 0 | 0 | -1,9747 | 1 | 0       | 0  | 0       | 0  |
| transforming growth factor beta receptor signaling pathway                                                                | 0 | 0 | -1,9732 | 1 | 0       | 0  | 0       | 0  |
| protein polymerization                                                                                                    | 0 | 0 | -1,9728 | 1 | 0       | 0  | 0       | 0  |
| GTP binding                                                                                                               | 0 | 0 | -1,9722 | 1 | 0       | 0  | -2,1496 | 1  |
| mRNA metabolic process                                                                                                    | 0 | 0 | -1,9569 | 1 | -3,501  | 1  | -4,6459 | 1  |
| cytoplasmic part                                                                                                          | 0 | 0 | -1,9564 | 1 | -11,656 | 1  | -19,524 | 1  |
| negative regulation of molecular function                                                                                 | 0 | 0 | -1,9468 | 1 | 0       | 0  | 0       | 0  |
| macromolecular complex subunit organization                                                                               | 0 | 0 | -1,9439 | 1 | 0       | 0  | -2,5982 | 1  |
| lamellipodium                                                                                                             | 0 | 0 | -1,9439 | 1 | 0       | 0  | 0       | 0  |
| positive regulation of catalytic activity                                                                                 | 0 | 0 | -1,9355 | 1 | 0       | 0  | 0       | 0  |
| regulation of myeloid leukocyte differentiation                                                                           | 0 | 0 | -1,9297 | 1 | 0       | 0  | 0       | 0  |
| cell-substrate adhesion                                                                                                   | 0 | 0 | -1,9251 | 1 | 0       | 0  | 0       | 0  |
| protein metabolic process                                                                                                 | 0 | 0 | -1,9247 | 1 | -5,9957 | 1  | -13,703 | 1  |
| ADP binding                                                                                                               | 0 | 0 | -1,9031 | 1 | 0       | 0  | 0       | 0  |
| positive regulation of calcium-mediated signaling                                                                         | 0 | 0 | -1,9031 | 1 | 0       | 0  | 0       | 0  |
| positive regulation of protein polymerization                                                                             | 0 | 0 | -1,9031 | 1 | 0       | 0  | 0       | 0  |
| adaptive immune response                                                                                                  | 0 | 0 | -1,8973 | 1 | 0       | 0  | -1,3477 | 1  |
| adaptive immune response based on somatic recombination of immune receptors built from immunoglobulin superfamily domains | 0 | 0 | -1,8973 | 1 | 0       | 0  | -1,3477 | 1  |
| actin polymerization or depolymerization                                                                                  | 0 | 0 | -1,8972 | 1 | 0       | 0  | 0       | 0  |

|                                                                                                                                   |   |   |         |   |         |   |         |   |
|-----------------------------------------------------------------------------------------------------------------------------------|---|---|---------|---|---------|---|---------|---|
| transcription corepressor activity                                                                                                | 0 | 0 | -1,8878 | 1 | 0       | 0 | 0       | 0 |
| phosphoric ester hydrolase activity                                                                                               | 0 | 0 | -1,8833 | 1 | 0       | 0 | -1,8387 | 1 |
| antigen processing and presentation of endogenous peptide antigen via MHC class I CD8-positive, alpha-beta T cell differentiation | 0 | 0 | -1,8833 | 1 | 0       | 0 | 0       | 0 |
| positive regulation of actin filament polymerization                                                                              | 0 | 0 | -1,8833 | 1 | 0       | 0 | 0       | 0 |
| positive regulation of stress fiber assembly                                                                                      | 0 | 0 | -1,8833 | 1 | 0       | 0 | 0       | 0 |
| negative T cell selection                                                                                                         | 0 | 0 | -1,8833 | 1 | 0       | 0 | 0       | 0 |
| intracellular organelle part regulation of actin polymerization or depolymerization                                               | 0 | 0 | -1,8804 | 1 | 0       | 0 | 0       | 0 |
| regulation of smooth muscle cell proliferation                                                                                    | 0 | 0 | -1,8804 | 1 | 0       | 0 | 0       | 0 |
| negative regulation of immune system process                                                                                      | 0 | 0 | -1,88   | 1 | 0       | 0 | 0       | 0 |
| anatomical structure morphogenesis                                                                                                | 0 | 0 | -1,8667 | 1 | 0       | 0 | 0       | 0 |
| zinc ion binding                                                                                                                  | 0 | 0 | -1,8663 | 1 | 0       | 0 | -13,517 | 1 |
| regulation of transferase activity                                                                                                | 0 | 0 | -1,8625 | 1 | 0       | 0 | 0       | 0 |
| regulation of organelle organization                                                                                              | 0 | 0 | -1,8625 | 1 | 0       | 0 | 0       | 0 |
| GTPase activator activity                                                                                                         | 0 | 0 | -1,8596 | 1 | 0       | 0 | 0       | 0 |
| macromolecule catabolic process                                                                                                   | 0 | 0 | -1,8398 | 1 | 0       | 0 | -2,2879 | 1 |
| in utero embryonic development                                                                                                    | 0 | 0 | -1,8398 | 1 | 0       | 0 | 0       | 0 |
| natural killer cell activation                                                                                                    | 0 | 0 | -1,8398 | 1 | 0       | 0 | 0       | 0 |
| positive regulation of protein modification process                                                                               | 0 | 0 | -1,8398 | 1 | 0       | 0 | 0       | 0 |
| anterior/posterior axis specification                                                                                             | 0 | 0 | -1,8398 | 1 | 0       | 0 | 0       | 0 |
| cell leading edge                                                                                                                 | 0 | 0 | -1,8398 | 1 | 0       | 0 | 0       | 0 |
| regulation of actin filament length                                                                                               | 0 | 0 | -1,833  | 1 | 0       | 0 | 0       | 0 |
| actin filament polymerization                                                                                                     | 0 | 0 | -1,833  | 1 | 0       | 0 | 0       | 0 |
| positive regulation of cellular protein metabolic process                                                                         | 0 | 0 | -1,8186 | 1 | 0       | 0 | -2,7984 | 1 |
| organelle part                                                                                                                    | 0 | 0 | -1,8166 | 1 | -2,9486 | 1 | -16,085 | 1 |
| regulation of caspase activity                                                                                                    | 0 | 0 | -1,8135 | 1 | 0       | 0 | 0       | 0 |
| cellular response to organic substance                                                                                            | 0 | 0 | -1,8128 | 1 | 0       | 0 | 0       | 0 |
| negative regulation of transforming growth factor beta receptor signaling pathway                                                 | 0 | 0 | -1,8102 | 1 | 0       | 0 | 0       | 0 |

|                                                         |   |   |         |   |        |   |         |   |
|---------------------------------------------------------|---|---|---------|---|--------|---|---------|---|
| negative regulation of osteoblast differentiation       | 0 | 0 | -1,8102 | 1 | 0      | 0 | 0       | 0 |
| macromolecular complex assembly                         | 0 | 0 | -1,8048 | 1 | 0      | 0 | -2,6585 | 1 |
| protein complex binding                                 | 0 | 0 | -1,8048 | 1 | 0      | 0 | -2,3479 | 1 |
| defense response                                        | 0 | 0 | -1,8034 | 1 | 0      | 0 | 0       | 0 |
| cell projection organization                            | 0 | 0 | -1,7931 | 1 | 0      | 0 | 0       | 0 |
| smooth muscle cell proliferation                        | 0 | 0 | -1,7828 | 1 | 0      | 0 | 0       | 0 |
| response to protein stimulus                            | 0 | 0 | -1,7764 | 1 | 0      | 0 | 0       | 0 |
| tissue homeostasis                                      | 0 | 0 | -1,7742 | 1 | 0      | 0 | 0       | 0 |
| nucleoside-triphosphatase activity                      | 0 | 0 | -1,7742 | 1 | 0      | 0 | 0       | 0 |
| Rho guanyl-nucleotide exchange factor activity          | 0 | 0 | -1,771  | 1 | 0      | 0 | 0       | 0 |
| SMAD binding                                            | 0 | 0 | -1,7616 | 1 | 0      | 0 | 0       | 0 |
| regulation of endopeptidase activity                    | 0 | 0 | -1,7508 | 1 | 0      | 0 | 0       | 0 |
| cytoskeleton                                            | 0 | 0 | -1,7489 | 1 | 0      | 0 | 0       | 0 |
| regulation of cellular component biogenesis             | 0 | 0 | -1,7489 | 1 | 0      | 0 | 0       | 0 |
| positive regulation of actin filament bundle assembly   | 0 | 0 | -1,7478 | 1 | 0      | 0 | 0       | 0 |
| activation of immune response                           | 0 | 0 | -1,7441 | 1 | 0      | 0 | 0       | 0 |
| positive regulation of protein metabolic process        | 0 | 0 | -1,7417 | 1 | 0      | 0 | -2,6521 | 1 |
| purine ribonucleotide binding                           | 0 | 0 | -1,7393 | 1 | 0      | 0 | -2,8602 | 1 |
| response to cytokine stimulus                           | 0 | 0 | -1,7371 | 1 | 0      | 0 | 0       | 0 |
| ribonucleotide binding                                  | 0 | 0 | -1,7325 | 1 | 0      | 0 | -2,8501 | 1 |
| protein tyrosine/serine/threonine phosphatase activity  | 0 | 0 | -1,7195 | 1 | 0      | 0 | 0       | 0 |
| cellular macromolecular complex subunit organization    | 0 | 0 | -1,7195 | 1 | 0      | 0 | 0       | 0 |
| second-messenger-mediated signaling                     | 0 | 0 | -1,7195 | 1 | 0      | 0 | 0       | 0 |
| positive regulation of smooth muscle cell proliferation | 0 | 0 | -1,7195 | 1 | 0      | 0 | 0       | 0 |
| regulation of stress fiber assembly                     | 0 | 0 | -1,7184 | 1 | 0      | 0 | 0       | 0 |
| regulation of calcium-mediated signaling                | 0 | 0 | -1,7184 | 1 | 0      | 0 | 0       | 0 |
| multicellular organismal homeostasis                    | 0 | 0 | -1,7181 | 1 | 0      | 0 | 0       | 0 |
| guanyl nucleotide binding                               | 0 | 0 | -1,7145 | 1 | 0      | 0 | -2,086  | 1 |
| guanyl ribonucleotide binding                           | 0 | 0 | -1,7145 | 1 | 0      | 0 | -2,086  | 1 |
| mRNA processing                                         | 0 | 0 | -1,7065 | 1 | -2,924 | 1 | -3,1204 | 1 |
| protein serine/threonine phosphatase complex            | 0 | 0 | -1,6961 | 1 | 0      | 0 | -1,3052 | 1 |
| regulation of protein polymerization                    | 0 | 0 | -1,6961 | 1 | 0      | 0 | 0       | 0 |
| natural killer cell mediated immunity                   | 0 | 0 | -1,6961 | 1 | 0      | 0 | 0       | 0 |

|                                                                            |   |   |         |   |   |   |         |   |
|----------------------------------------------------------------------------|---|---|---------|---|---|---|---------|---|
| natural killer cell mediated cytotoxicity                                  | 0 | 0 | -1,6961 | 1 | 0 | 0 | 0       | 0 |
| TAP2 binding                                                               | 0 | 0 | -1,6845 | 1 | 0 | 0 | 0       | 0 |
| JUN kinase kinase kinase activity                                          | 0 | 0 | -1,6845 | 1 | 0 | 0 | 0       | 0 |
| positive regulation of transcription via sterol regulatory element binding | 0 | 0 | -1,6845 | 1 | 0 | 0 | 0       | 0 |
| cellular response to mycophenolic acid                                     | 0 | 0 | -1,6845 | 1 | 0 | 0 | 0       | 0 |
| uropod organization                                                        | 0 | 0 | -1,6845 | 1 | 0 | 0 | 0       | 0 |
| TAP1 binding                                                               | 0 | 0 | -1,6845 | 1 | 0 | 0 | 0       | 0 |
| TAP binding                                                                | 0 | 0 | -1,6845 | 1 | 0 | 0 | 0       | 0 |
| activation of pro-apoptotic gene products                                  | 0 | 0 | -1,6845 | 1 | 0 | 0 | 0       | 0 |
| TAP complex                                                                | 0 | 0 | -1,6845 | 1 | 0 | 0 | 0       | 0 |
| natural killer cell degranulation                                          | 0 | 0 | -1,6845 | 1 | 0 | 0 | 0       | 0 |
| response to mycophenolic acid                                              | 0 | 0 | -1,6845 | 1 | 0 | 0 | 0       | 0 |
| tapasin binding                                                            | 0 | 0 | -1,6845 | 1 | 0 | 0 | 0       | 0 |
| sphinganine-1-phosphate metabolic process                                  | 0 | 0 | -1,6845 | 1 | 0 | 0 | 0       | 0 |
| cellular response to fatty acid                                            | 0 | 0 | -1,6845 | 1 | 0 | 0 | 0       | 0 |
| Arp2/3 protein complex                                                     | 0 | 0 | -1,6839 | 1 | 0 | 0 | 0       | 0 |
| galactose metabolic process                                                | 0 | 0 | -1,6839 | 1 | 0 | 0 | 0       | 0 |
| trailing edge                                                              | 0 | 0 | -1,6839 | 1 | 0 | 0 | 0       | 0 |
| positive regulation of immunoglobulin production                           | 0 | 0 | -1,6839 | 1 | 0 | 0 | 0       | 0 |
| uropod                                                                     | 0 | 0 | -1,6839 | 1 | 0 | 0 | 0       | 0 |
| apoptotic protease activator activity                                      | 0 | 0 | -1,6839 | 1 | 0 | 0 | 0       | 0 |
| regulation of actin filament polymerization                                | 0 | 0 | -1,6828 | 1 | 0 | 0 | 0       | 0 |
| regulation of cytoskeleton organization                                    | 0 | 0 | -1,6707 | 1 | 0 | 0 | 0       | 0 |
| transferase activity, transferring phosphorus-containing groups            | 0 | 0 | -1,6653 | 1 | 0 | 0 | -5,3354 | 1 |
| proteolysis involved in cellular protein catabolic process                 | 0 | 0 | -1,6653 | 1 | 0 | 0 | -1,9969 | 1 |
| negative regulation of multicellular organismal process                    | 0 | 0 | -1,6645 | 1 | 0 | 0 | 0       | 0 |
| morphogenesis of a branching structure                                     | 0 | 0 | -1,6645 | 1 | 0 | 0 | 0       | 0 |
| homeostatic process                                                        | 0 | 0 | -1,6644 | 1 | 0 | 0 | 0       | 0 |
| protein serine/threonine kinase activity                                   | 0 | 0 | -1,6446 | 1 | 0 | 0 | -2,5053 | 1 |
| homeostasis of number of cells within a tissue                             | 0 | 0 | -1,6446 | 1 | 0 | 0 | 0       | 0 |
| lamellipodium assembly                                                     | 0 | 0 | -1,6446 | 1 | 0 | 0 | 0       | 0 |
| interleukin-1 beta production                                              | 0 | 0 | -1,6446 | 1 | 0 | 0 | 0       | 0 |
| regulation of interleukin-1 beta production                                | 0 | 0 | -1,6446 | 1 | 0 | 0 | 0       | 0 |

|                                                                                    |   |   |         |   |   |   |         |    |
|------------------------------------------------------------------------------------|---|---|---------|---|---|---|---------|----|
| ER-nucleus signaling pathway                                                       | 0 | 0 | -1,6401 | 1 | 0 | 0 | -2,0957 | 1  |
| induction of apoptosis by extracellular signals                                    | 0 | 0 | -1,6401 | 1 | 0 | 0 | 0       | 0  |
| epithelial cell proliferation                                                      | 0 | 0 | -1,6359 | 1 | 0 | 0 | 0       | 0  |
| GTP metabolic process                                                              | 0 | 0 | -1,6146 | 1 | 0 | 0 | -2,1292 | 1  |
| pyrophosphatase activity                                                           | 0 | 0 | -1,6146 | 1 | 0 | 0 | 0       | 0  |
| inflammatory response                                                              | 0 | 0 | -1,6128 | 1 | 0 | 0 | 0       | 0  |
| protein homodimerization activity                                                  | 0 | 0 | -1,6111 | 1 | 0 | 0 | 0       | 0  |
| cellular protein catabolic process                                                 | 0 | 0 | -1,5941 | 1 | 0 | 0 | -1,8811 | 1  |
| regulation of response to stress                                                   | 0 | 0 | -1,59   | 1 | 0 | 0 | 0       | 0  |
| protein complex assembly                                                           | 0 | 0 | -1,5843 | 1 | 0 | 0 | -1,7487 | 1  |
| protein complex biogenesis                                                         | 0 | 0 | -1,5843 | 1 | 0 | 0 | -1,7487 | 1  |
| activation of protein kinase activity                                              | 0 | 0 | -1,5836 | 1 | 0 | 0 | 0       | 0  |
| JAK-STAT cascade                                                                   | 0 | 0 | -1,5822 | 1 | 0 | 0 | 0       | 0  |
| antigen processing and presentation                                                | 0 | 0 | -1,5822 | 1 | 0 | 0 | 0       | 0  |
| hydrolase activity, acting on acid anhydrides, in phosphorus-containing anhydrides | 0 | 0 | -1,5819 | 1 | 0 | 0 | 0       | 0  |
| purine nucleotide binding                                                          | 0 | 0 | -1,5778 | 1 | 0 | 0 | -2,5053 | 1  |
| protein kinase activity                                                            | 0 | 0 | -1,5731 | 1 | 0 | 0 | -2,3801 | 1  |
| regulation of protein metabolic process                                            | 0 | 0 | -1,5729 | 1 | 0 | 0 | -5,4498 | 1  |
| cytosolic small ribosomal subunit                                                  | 0 | 0 | -1,5729 | 1 | 0 | 0 | -4,6536 | 1  |
| hydrolase activity, acting on acid anhydrides                                      | 0 | 0 | -1,5729 | 1 | 0 | 0 | 0       | 0  |
| mast cell activation                                                               | 0 | 0 | -1,5729 | 1 | 0 | 0 | 0       | 0  |
| response to mechanical stimulus                                                    | 0 | 0 | -1,5651 | 1 | 0 | 0 | 0       | 0  |
| positive regulation of protein complex assembly                                    | 0 | 0 | -1,5651 | 1 | 0 | 0 | 0       | 0  |
| heterophilic cell-cell adhesion                                                    | 0 | 0 | -1,5651 | 1 | 0 | 0 | 0       | 0  |
| axis specification                                                                 | 0 | 0 | -1,5651 | 1 | 0 | 0 | 0       | 0  |
| activated T cell proliferation                                                     | 0 | 0 | -1,5651 | 1 | 0 | 0 | 0       | 0  |
| nervous system development                                                         | 0 | 0 | -1,5529 | 1 | 0 | 0 | -1,8508 | -1 |
| purine nucleoside triphosphate metabolic process                                   | 0 | 0 | -1,5455 | 1 | 0 | 0 | -2,5053 | 1  |
| GTP catabolic process                                                              | 0 | 0 | -1,5453 | 1 | 0 | 0 | -1,9969 | 1  |
| negative regulation of defense response                                            | 0 | 0 | -1,5397 | 1 | 0 | 0 | 0       | 0  |
| regulation of peptidase activity                                                   | 0 | 0 | -1,5397 | 1 | 0 | 0 | 0       | 0  |
| regulation of positive chemotaxis                                                  | 0 | 0 | -1,5381 | 1 | 0 | 0 | 0       | 0  |
| positive regulation of positive chemotaxis                                         | 0 | 0 | -1,5381 | 1 | 0 | 0 | 0       | 0  |
| regulation of interleukin-1 production                                             | 0 | 0 | -1,5381 | 1 | 0 | 0 | 0       | 0  |

|                                                                                                                                         |   |   |         |   |   |   |         |    |
|-----------------------------------------------------------------------------------------------------------------------------------------|---|---|---------|---|---|---|---------|----|
| antigen processing and presentation of peptide antigen via MHC class I                                                                  | 0 | 0 | -1,5381 | 1 | 0 | 0 | 0       | 0  |
| positive regulation of cellular component organization                                                                                  | 0 | 0 | -1,5249 | 1 | 0 | 0 | 0       | 0  |
| transferase activity                                                                                                                    | 0 | 0 | -1,5157 | 1 | 0 | 0 | -6,1469 | 1  |
| negative regulation of calcium ion transport via voltage-gated calcium channel activity                                                 | 0 | 0 | -1,5157 | 1 | 0 | 0 | 0       | 0  |
| protein ubiquitination involved in ubiquitin-dependent protein catabolic process                                                        | 0 | 0 | -1,5157 | 1 | 0 | 0 | 0       | 0  |
| cellular extravasation                                                                                                                  | 0 | 0 | -1,5157 | 1 | 0 | 0 | 0       | 0  |
| small GTPase regulator activity                                                                                                         | 0 | 0 | -1,5157 | 1 | 0 | 0 | 0       | 0  |
| positive regulation of response to external stimulus                                                                                    | 0 | 0 | -1,5157 | 1 | 0 | 0 | 0       | 0  |
| pathway-restricted SMAD protein phosphorylation                                                                                         | 0 | 0 | -1,5157 | 1 | 0 | 0 | 0       | 0  |
| caspase regulator activity                                                                                                              | 0 | 0 | -1,5157 | 1 | 0 | 0 | 0       | 0  |
| transferase activity, transferring glycosyl groups                                                                                      | 0 | 0 | -1,5157 | 1 | 0 | 0 | 0       | 0  |
| dendrite                                                                                                                                | 0 | 0 | -1,5157 | 1 | 0 | 0 | 0       | 0  |
| GABA receptor binding                                                                                                                   | 0 | 0 | -1,5157 | 1 | 0 | 0 | 0       | 0  |
| positive regulation of cell-cell adhesion                                                                                               | 0 | 0 | -1,5157 | 1 | 0 | 0 | 0       | 0  |
| cortical actin cytoskeleton                                                                                                             | 0 | 0 | -1,496  | 1 | 0 | 0 | 0       | 0  |
| peptidyl-threonine modification                                                                                                         | 0 | 0 | -1,496  | 1 | 0 | 0 | 0       | 0  |
| hair follicle morphogenesis                                                                                                             | 0 | 0 | -1,496  | 1 | 0 | 0 | 0       | 0  |
| stress fiber assembly                                                                                                                   | 0 | 0 | -1,496  | 1 | 0 | 0 | 0       | 0  |
| peptidyl-threonine phosphorylation                                                                                                      | 0 | 0 | -1,496  | 1 | 0 | 0 | 0       | 0  |
| positive regulation of protein secretion                                                                                                | 0 | 0 | -1,496  | 1 | 0 | 0 | 0       | 0  |
| muscle cell proliferation                                                                                                               | 0 | 0 | -1,4861 | 1 | 0 | 0 | 0       | 0  |
| cAMP biosynthetic process                                                                                                               | 0 | 0 | -1,4857 | 1 | 0 | 0 | -1,5113 | -1 |
| homeostasis of number of cells                                                                                                          | 0 | 0 | -1,4801 | 1 | 0 | 0 | -1,8431 | 1  |
| nucleoside triphosphate metabolic process                                                                                               | 0 | 0 | -1,471  | 1 | 0 | 0 | -2,5477 | 1  |
| hormone receptor binding                                                                                                                | 0 | 0 | -1,4698 | 1 | 0 | 0 | 0       | 0  |
| regulation of production of molecular mediator of immune response                                                                       | 0 | 0 | -1,4698 | 1 | 0 | 0 | 0       | 0  |
| regulation of adaptive immune response based on somatic recombination of immune receptors built from immunoglobulin superfamily domains | 0 | 0 | -1,4664 | 1 | 0 | 0 | -2,3216 | 1  |
| regulation of adaptive immune response                                                                                                  | 0 | 0 | -1,4664 | 1 | 0 | 0 | -2,3216 | 1  |
| cell morphogenesis                                                                                                                      | 0 | 0 | -1,4655 | 1 | 0 | 0 | 0       | 0  |
| plasma membrane part                                                                                                                    | 0 | 0 | -1,4636 | 1 | 0 | 0 | -2,0007 | -1 |

|                                                                           |   |   |         |   |         |   |         |   |
|---------------------------------------------------------------------------|---|---|---------|---|---------|---|---------|---|
| cytokine receptor activity                                                | 0 | 0 | -1,4617 | 1 | 0       | 0 | 0       | 0 |
| osteoclast differentiation                                                | 0 | 0 | -1,4617 | 1 | 0       | 0 | 0       | 0 |
| gene-specific transcription from RNA polymerase II promoter               | 0 | 0 | -1,4617 | 1 | 0       | 0 | 0       | 0 |
| regulation of gene-specific transcription from RNA polymerase II promoter | 0 | 0 | -1,4617 | 1 | 0       | 0 | 0       | 0 |
| inositol or phosphatidylinositol kinase activity                          | 0 | 0 | -1,4617 | 1 | 0       | 0 | 0       | 0 |
| macromolecular complex                                                    | 0 | 0 | -1,4584 | 1 | -4,1244 | 1 | -14,848 | 1 |
| interleukin-1 production                                                  | 0 | 0 | -1,4474 | 1 | 0       | 0 | 0       | 0 |
| growth                                                                    | 0 | 0 | -1,4474 | 1 | 0       | 0 | 0       | 0 |
| negative regulation of small GTPase mediated signal transduction          | 0 | 0 | -1,4474 | 1 | 0       | 0 | 0       | 0 |
| embryonic axis specification                                              | 0 | 0 | -1,4474 | 1 | 0       | 0 | 0       | 0 |
| negative regulation of Ras protein signal transduction                    | 0 | 0 | -1,4474 | 1 | 0       | 0 | 0       | 0 |
| purine nucleotide metabolic process                                       | 0 | 0 | -1,4439 | 1 | 0       | 0 | 0       | 0 |
| purine ribonucleoside triphosphate metabolic process                      | 0 | 0 | -1,4396 | 1 | 0       | 0 | -2,7037 | 1 |
| nuclear body                                                              | 0 | 0 | -1,4313 | 1 | 0       | 0 | -3,1011 | 1 |
| small ribosomal subunit                                                   | 0 | 0 | -1,4312 | 1 | 0       | 0 | -5,2933 | 1 |
| positive regulation of protein transport                                  | 0 | 0 | -1,4312 | 1 | 0       | 0 | 0       | 0 |
| chemokine binding                                                         | 0 | 0 | -1,4312 | 1 | 0       | 0 | 0       | 0 |
| palate development                                                        | 0 | 0 | -1,4312 | 1 | 0       | 0 | 0       | 0 |
| G-protein chemoattractant receptor activity                               | 0 | 0 | -1,4312 | 1 | 0       | 0 | 0       | 0 |
| positive regulation of interferon-gamma production                        | 0 | 0 | -1,4312 | 1 | 0       | 0 | 0       | 0 |
| chemokine receptor activity                                               | 0 | 0 | -1,4312 | 1 | 0       | 0 | 0       | 0 |
| positive regulation of cyclic nucleotide biosynthetic process             | 0 | 0 | -1,4312 | 1 | 0       | 0 | 0       | 0 |
| positive regulation of nucleotide biosynthetic process                    | 0 | 0 | -1,4312 | 1 | 0       | 0 | 0       | 0 |
| lipid storage                                                             | 0 | 0 | -1,4312 | 1 | 0       | 0 | 0       | 0 |
| ribonucleoside triphosphate metabolic process                             | 0 | 0 | -1,4291 | 1 | 0       | 0 | -2,6689 | 1 |
| positive regulation of signal transduction                                | 0 | 0 | -1,4284 | 1 | 0       | 0 | -1,3809 | 1 |
| anatomical structure formation involved in morphogenesis                  | 0 | 0 | -1,4284 | 1 | 0       | 0 | 0       | 0 |
| Ras guanyl-nucleotide exchange factor activity                            | 0 | 0 | -1,4284 | 1 | 0       | 0 | 0       | 0 |
| regulation of cellular component size                                     | 0 | 0 | -1,4186 | 1 | 0       | 0 | 0       | 0 |
| tissue morphogenesis                                                      | 0 | 0 | -1,4139 | 1 | 0       | 0 | 0       | 0 |
| cellular response to protein stimulus                                     | 0 | 0 | -1,4139 | 1 | 0       | 0 | 0       | 0 |
| specific transcriptional repressor activity                               | 0 | 0 | -1,4139 | 1 | 0       | 0 | 0       | 0 |

|                                                                                   |   |   |         |   |   |   |         |    |
|-----------------------------------------------------------------------------------|---|---|---------|---|---|---|---------|----|
| regulation of cyclic nucleotide biosynthetic process                              | 0 | 0 | -1,4088 | 1 | 0 | 0 | -1,6149 | -1 |
| regulation of nucleotide biosynthetic process                                     | 0 | 0 | -1,4088 | 1 | 0 | 0 | -1,6149 | -1 |
| glycosylation                                                                     | 0 | 0 | -1,3975 | 1 | 0 | 0 | 0       | 0  |
| protein amino acid glycosylation                                                  | 0 | 0 | -1,3975 | 1 | 0 | 0 | 0       | 0  |
| macromolecule glycosylation                                                       | 0 | 0 | -1,3975 | 1 | 0 | 0 | 0       | 0  |
| regulation of osteoblast differentiation                                          | 0 | 0 | -1,3828 | 1 | 0 | 0 | 0       | 0  |
| lymphocyte costimulation                                                          | 0 | 0 | -1,381  | 1 | 0 | 0 | 0       | 0  |
| T cell costimulation                                                              | 0 | 0 | -1,381  | 1 | 0 | 0 | 0       | 0  |
| antigen processing and presentation of endogenous antigen                         | 0 | 0 | -1,381  | 1 | 0 | 0 | 0       | 0  |
| cellular response to lithium ion                                                  | 0 | 0 | -1,381  | 1 | 0 | 0 | 0       | 0  |
| antigen processing and presentation of endogenous peptide antigen                 | 0 | 0 | -1,381  | 1 | 0 | 0 | 0       | 0  |
| positive regulation of alpha-beta T cell proliferation                            | 0 | 0 | -1,381  | 1 | 0 | 0 | 0       | 0  |
| cell-substrate junction assembly                                                  | 0 | 0 | -1,3648 | 1 | 0 | 0 | 0       | 0  |
| positive regulation of cyclic nucleotide metabolic process                        | 0 | 0 | -1,3648 | 1 | 0 | 0 | 0       | 0  |
| positive regulation of nucleotide metabolic process                               | 0 | 0 | -1,3648 | 1 | 0 | 0 | 0       | 0  |
| positive regulation of signaling process                                          | 0 | 0 | -1,3629 | 1 | 0 | 0 | 0       | 0  |
| T cell mediated immunity                                                          | 0 | 0 | -1,3582 | 1 | 0 | 0 | -2,5471 | 1  |
| phagocytic cup                                                                    | 0 | 0 | -1,3539 | 1 | 0 | 0 | 0       | 0  |
| positive regulation of endothelial cell differentiation                           | 0 | 0 | -1,3539 | 1 | 0 | 0 | 0       | 0  |
| negative regulation of gene-specific transcription                                | 0 | 0 | -1,3539 | 1 | 0 | 0 | 0       | 0  |
| neutrophil differentiation                                                        | 0 | 0 | -1,3539 | 1 | 0 | 0 | 0       | 0  |
| protein tyrosine/threonine phosphatase activity                                   | 0 | 0 | -1,3539 | 1 | 0 | 0 | 0       | 0  |
| negative regulation of protein binding                                            | 0 | 0 | -1,3539 | 1 | 0 | 0 | 0       | 0  |
| aminoacyl-tRNA hydrolase activity                                                 | 0 | 0 | -1,3539 | 1 | 0 | 0 | 0       | 0  |
| regulation of inflammatory response                                               | 0 | 0 | -1,3539 | 1 | 0 | 0 | 0       | 0  |
| natural killer cell activation involved in immune response                        | 0 | 0 | -1,3539 | 1 | 0 | 0 | 0       | 0  |
| trachea formation                                                                 | 0 | 0 | -1,3539 | 1 | 0 | 0 | 0       | 0  |
| negative regulation of interleukin-1 beta production                              | 0 | 0 | -1,3539 | 1 | 0 | 0 | 0       | 0  |
| antigen processing and presentation of exogenous peptide antigen via MHC class Ib | 0 | 0 | -1,3539 | 1 | 0 | 0 | 0       | 0  |



|                                                                                                  |   |   |         |   |         |   |         |    |
|--------------------------------------------------------------------------------------------------|---|---|---------|---|---------|---|---------|----|
| Rho GDP-dissociation inhibitor activity                                                          | 0 | 0 | -1,3539 | 1 | 0       | 0 | 0       | 0  |
| MHC class I protein binding                                                                      | 0 | 0 | -1,3539 | 1 | 0       | 0 | 0       | 0  |
| regulation of striated muscle tissue development                                                 | 0 | 0 | -1,3539 | 1 | 0       | 0 | 0       | 0  |
| negative regulation of interleukin-1 production                                                  | 0 | 0 | -1,3539 | 1 | 0       | 0 | 0       | 0  |
| antigen processing and presentation of exogenous protein antigen via MHC class Ib, TAP-dependent | 0 | 0 | -1,3539 | 1 | 0       | 0 | 0       | 0  |
| JAK-STAT cascade involved in growth hormone signaling pathway                                    | 0 | 0 | -1,3539 | 1 | 0       | 0 | 0       | 0  |
| misfolded protein binding                                                                        | 0 | 0 | -1,3539 | 1 | 0       | 0 | 0       | 0  |
| cyclic nucleotide biosynthetic process                                                           | 0 | 0 | -1,3539 | 1 | 0       | 0 | -2,0393 | -1 |
| enzyme linked receptor protein signaling pathway                                                 | 0 | 0 | -1,3457 | 1 | 0       | 0 | 0       | 0  |
| cellular nitrogen compound biosynthetic process                                                  | 0 | 0 | -1,3457 | 1 | 0       | 0 | 0       | 0  |
| regulation of growth                                                                             | 0 | 0 | -1,3417 | 1 | 0       | 0 | 0       | 0  |
| purine ribonucleoside triphosphate catabolic process                                             | 0 | 0 | -1,3368 | 1 | 0       | 0 | -1,8658 | 1  |
| regulation of cyclic nucleotide metabolic process                                                | 0 | 0 | -1,3318 | 1 | 0       | 0 | -1,7008 | -1 |
| nucleotide catabolic process                                                                     | 0 | 0 | -1,3306 | 1 | 0       | 0 | 0       | 0  |
| nucleobase, nucleoside and nucleotide metabolic process                                          | 0 | 0 | -1,3297 | 1 | 0       | 0 | -1,3138 | 1  |
| regulation of response to external stimulus                                                      | 0 | 0 | -1,3224 | 1 | 0       | 0 | 0       | 0  |
| regulation of anatomical structure morphogenesis                                                 | 0 | 0 | -1,322  | 1 | 0       | 0 | 0       | 0  |
| ribonucleoside triphosphate catabolic process                                                    | 0 | 0 | -1,3201 | 1 | 0       | 0 | -1,8396 | 1  |
| identical protein binding                                                                        | 0 | 0 | -1,3201 | 1 | 0       | 0 | 0       | 0  |
| cell-cell adhesion                                                                               | 0 | 0 | -1,3201 | 1 | 0       | 0 | 0       | 0  |
| cell projection assembly                                                                         | 0 | 0 | -1,3174 | 1 | 0       | 0 | 0       | 0  |
| regulation of cAMP biosynthetic process                                                          | 0 | 0 | -1,3174 | 1 | 0       | 0 | -1,3809 | -1 |
| regulation of embryonic development                                                              | 0 | 0 | -1,3169 | 1 | 0       | 0 | 0       | 0  |
| muscle structure development                                                                     | 0 | 0 | -1,316  | 1 | 0       | 0 | 0       | 0  |
| transition metal ion binding                                                                     | 0 | 0 | -1,3128 | 1 | 0       | 0 | -9,5129 | 1  |
| patterning of blood vessels                                                                      | 0 | 0 | -1,3128 | 1 | 0       | 0 | 0       | 0  |
| regulation of osteoclast differentiation                                                         | 0 | 0 | -1,3128 | 1 | 0       | 0 | 0       | 0  |
| RNA processing                                                                                   | 0 | 0 | -1,3111 | 1 | -4,4868 | 1 | -4,3487 | 1  |
| regulation of protein complex assembly                                                           | 0 | 0 | -1,3076 | 1 | 0       | 0 | 0       | 0  |
| regulation of cell adhesion                                                                      | 0 | 0 | -1,3076 | 1 | 0       | 0 | 0       | 0  |
| mitochondrion                                                                                    | 0 | 0 | 0       | 0 | -11,523 | 1 | -5,8665 | 1  |
| ribonucleoprotein complex                                                                        | 0 | 0 | 0       | 0 | -6,7595 | 1 | -13,73  | 1  |

|                                                       |   |   |   |   |         |   |         |   |
|-------------------------------------------------------|---|---|---|---|---------|---|---------|---|
| catalytic activity                                    | 0 | 0 | 0 | 0 | -5,1884 | 1 | -6,6364 | 1 |
| RNA binding                                           | 0 | 0 | 0 | 0 | -4,9747 | 1 | -12,799 | 1 |
| translation                                           | 0 | 0 | 0 | 0 | -3,7232 | 1 | -10,943 | 1 |
| ncRNA metabolic process                               | 0 | 0 | 0 | 0 | -3,488  | 1 | 0       | 0 |
| mitochondrial part                                    | 0 | 0 | 0 | 0 | -2,8726 | 1 | -4,8416 | 1 |
| tRNA metabolic process                                | 0 | 0 | 0 | 0 | -2,6198 | 1 | 0       | 0 |
| protein amino acid O-linked glycosylation             | 0 | 0 | 0 | 0 | -2,3298 | 1 | 0       | 0 |
| mitochondrial inner membrane                          | 0 | 0 | 0 | 0 | -2,2042 | 1 | -4,3936 | 1 |
| intracellular transport                               | 0 | 0 | 0 | 0 | -2,1104 | 1 | -3,6892 | 1 |
| intracellular protein transport                       | 0 | 0 | 0 | 0 | -2,0679 | 1 | -2,6101 | 1 |
| organelle inner membrane                              | 0 | 0 | 0 | 0 | -2,0604 | 1 | -5,6596 | 1 |
| ligase activity                                       | 0 | 0 | 0 | 0 | -2,0108 | 1 | -2,3216 | 1 |
| purine nucleoside monophosphate metabolic process     | 0 | 0 | 0 | 0 | -1,9468 | 1 | 0       | 0 |
| purine ribonucleoside monophosphate metabolic process | 0 | 0 | 0 | 0 | -1,9468 | 1 | 0       | 0 |
| eukaryotic translation initiation factor 3 complex    | 0 | 0 | 0 | 0 | -1,9209 | 1 | 0       | 0 |
| acyl-CoA binding                                      | 0 | 0 | 0 | 0 | -1,9074 | 1 | 0       | 0 |
| calcium-dependent protein binding                     | 0 | 0 | 0 | 0 | -1,9074 | 1 | 0       | 0 |
| protein transport                                     | 0 | 0 | 0 | 0 | -1,8758 | 1 | -5,2464 | 1 |
| cellular protein localization                         | 0 | 0 | 0 | 0 | -1,79   | 1 | -3,5716 | 1 |
| mitochondrial matrix                                  | 0 | 0 | 0 | 0 | -1,79   | 1 | 0       | 0 |
| mitochondrial lumen                                   | 0 | 0 | 0 | 0 | -1,79   | 1 | 0       | 0 |
| regulation of interleukin-6 production                | 0 | 0 | 0 | 0 | -1,79   | 1 | 0       | 0 |
| establishment of protein localization                 | 0 | 0 | 0 | 0 | -1,7839 | 1 | -4,7905 | 1 |
| spliceosomal complex                                  | 0 | 0 | 0 | 0 | -1,7839 | 1 | -1,5347 | 1 |
| positive regulation of type I interferon production   | 0 | 0 | 0 | 0 | -1,7839 | 1 | 0       | 0 |
| histone lysine demethylation                          | 0 | 0 | 0 | 0 | -1,7839 | 1 | 0       | 0 |
| cellular macromolecule localization                   | 0 | 0 | 0 | 0 | -1,7555 | 1 | -4,0391 | 1 |
| catabolic process                                     | 0 | 0 | 0 | 0 | -1,7462 | 1 | -2,4546 | 1 |
| organelle membrane                                    | 0 | 0 | 0 | 0 | -1,7362 | 1 | -7,0645 | 1 |
| ion binding                                           | 0 | 0 | 0 | 0 | -1,7149 | 1 | -6,7932 | 1 |
| interleukin-6 production                              | 0 | 0 | 0 | 0 | -1,7149 | 1 | 0       | 0 |
| ribonucleoside monophosphate metabolic process        | 0 | 0 | 0 | 0 | -1,6816 | 1 | 0       | 0 |
| cation binding                                        | 0 | 0 | 0 | 0 | -1,6298 | 1 | -6,8153 | 1 |
| ribosome                                              | 0 | 0 | 0 | 0 | -1,6206 | 1 | -8,1765 | 1 |
| metal ion binding                                     | 0 | 0 | 0 | 0 | -1,6206 | 1 | -7,1878 | 1 |
| DNA metabolic process                                 | 0 | 0 | 0 | 0 | -1,6206 | 1 | -1,7942 | 1 |
| ncRNA processing                                      | 0 | 0 | 0 | 0 | -1,6201 | 1 | 0       | 0 |
| protein transporter activity                          | 0 | 0 | 0 | 0 | -1,6134 | 1 | 0       | 0 |
| mitochondrial membrane                                | 0 | 0 | 0 | 0 | -1,6056 | 1 | -4,295  | 1 |
| kinase inhibitor activity                             | 0 | 0 | 0 | 0 | -1,575  | 1 | 0       | 0 |

|                                    |   |   |   |   |         |   |         |   |
|------------------------------------|---|---|---|---|---------|---|---------|---|
| mitochondrial envelope             | 0 | 0 | 0 | 0 | -1,5157 | 1 | -4,5361 | 1 |
| purine nucleoside binding          | 0 | 0 | 0 | 0 | -1,5102 | 1 | 0       | 0 |
| response to peptide hormone        |   |   |   |   |         |   |         |   |
| stimulus                           | 0 | 0 | 0 | 0 | -1,4915 | 1 | 0       | 0 |
| AMP metabolic process              | 0 | 0 | 0 | 0 | -1,4503 | 1 | 0       | 0 |
| cellular catabolic process         | 0 | 0 | 0 | 0 | -1,4475 | 1 | -3,3336 | 1 |
| nucleoside binding                 | 0 | 0 | 0 | 0 | -1,4475 | 1 | 0       | 0 |
| soluble fraction                   | 0 | 0 | 0 | 0 | -1,4275 | 1 | 0       | 0 |
| mitochondrial respiratory chain    | 0 | 0 | 0 | 0 | -1,4081 | 1 | 0       | 0 |
| acetyl-CoA biosynthetic process    | 0 | 0 | 0 | 0 | -1,3788 | 1 | 0       | 0 |
| coenzyme metabolic process         | 0 | 0 | 0 | 0 | -1,3788 | 1 | 0       | 0 |
| regulation of interleukin-6        |   |   |   |   |         |   |         |   |
| biosynthetic process               | 0 | 0 | 0 | 0 | -1,3788 | 1 | 0       | 0 |
| adenyl nucleotide binding          | 0 | 0 | 0 | 0 | -1,3679 | 1 | 0       | 0 |
| respiratory chain                  | 0 | 0 | 0 | 0 | -1,3426 | 1 | 0       | 0 |
| antigen processing and             |   |   |   |   |         |   |         |   |
| presentation of peptide antigen    | 0 | 0 | 0 | 0 | -1,3036 | 1 | 0       | 0 |
| structural constituent of          |   |   |   |   |         |   |         |   |
| ribosome                           | 0 | 0 | 0 | 0 | 0       | 0 | -10,9   | 1 |
| chromatin organization             | 0 | 0 | 0 | 0 | 0       | 0 | -10,231 | 1 |
| chromatin modification             | 0 | 0 | 0 | 0 | 0       | 0 | -9,7305 | 1 |
| chromosome organization            | 0 | 0 | 0 | 0 | 0       | 0 | -8,3969 | 1 |
| ribosomal subunit                  | 0 | 0 | 0 | 0 | 0       | 0 | -8,0348 | 1 |
| cytosolic part                     | 0 | 0 | 0 | 0 | 0       | 0 | -7,7167 | 1 |
| cytosolic ribosome                 | 0 | 0 | 0 | 0 | 0       | 0 | -6,6556 | 1 |
| macromolecule localization         | 0 | 0 | 0 | 0 | 0       | 0 | -6,5143 | 1 |
| covalent chromatin modification    | 0 | 0 | 0 | 0 | 0       | 0 | -6,1255 | 1 |
| histone modification               | 0 | 0 | 0 | 0 | 0       | 0 | -6,0645 | 1 |
| regulation of transcription        |   |   |   |   |         |   |         |   |
| regulator activity                 | 0 | 0 | 0 | 0 | 0       | 0 | -5,585  | 1 |
| regulation of transcription factor |   |   |   |   |         |   |         |   |
| activity                           | 0 | 0 | 0 | 0 | 0       | 0 | -5,585  | 1 |
| positive regulation of             |   |   |   |   |         |   |         |   |
| transcription regulator activity   | 0 | 0 | 0 | 0 | 0       | 0 | -5,4634 | 1 |
| positive regulation of             |   |   |   |   |         |   |         |   |
| transcription factor activity      | 0 | 0 | 0 | 0 | 0       | 0 | -5,4634 | 1 |
| positive regulation of DNA         |   |   |   |   |         |   |         |   |
| binding                            | 0 | 0 | 0 | 0 | 0       | 0 | -5,3605 | 1 |
| protein localization               | 0 | 0 | 0 | 0 | 0       | 0 | -5,1373 | 1 |
| protein complex                    | 0 | 0 | 0 | 0 | 0       | 0 | -5,0039 | 1 |
| positive regulation of binding     | 0 | 0 | 0 | 0 | 0       | 0 | -4,9872 | 1 |
| regulation of DNA binding          | 0 | 0 | 0 | 0 | 0       | 0 | -4,9208 | 1 |
| posttranscriptional regulation of  |   |   |   |   |         |   |         |   |
| gene expression                    | 0 | 0 | 0 | 0 | 0       | 0 | -4,7905 | 1 |
| envelope                           | 0 | 0 | 0 | 0 | 0       | 0 | -4,7905 | 1 |
| organelle envelope                 | 0 | 0 | 0 | 0 | 0       | 0 | -4,6383 | 1 |
| positive regulation of NF-kappaB   |   |   |   |   |         |   |         |   |
| transcription factor activity      | 0 | 0 | 0 | 0 | 0       | 0 | -4,4295 | 1 |
| rRNA binding                       | 0 | 0 | 0 | 0 | 0       | 0 | -4,3958 | 1 |
| regulation of catabolic process    | 0 | 0 | 0 | 0 | 0       | 0 | -3,3758 | 1 |

|                                                              |   |   |   |   |   |   |         |   |
|--------------------------------------------------------------|---|---|---|---|---|---|---------|---|
| cellular response to biotic stimulus                         | 0 | 0 | 0 | 0 | 0 | 0 | -3,3274 | 1 |
| regulation of translation                                    | 0 | 0 | 0 | 0 | 0 | 0 | -3,2736 | 1 |
| cellular response to stress                                  | 0 | 0 | 0 | 0 | 0 | 0 | -3,2461 | 1 |
| chromatin remodeling complex                                 | 0 | 0 | 0 | 0 | 0 | 0 | -3,2448 | 1 |
| histone deacetylase complex                                  | 0 | 0 | 0 | 0 | 0 | 0 | -3,1182 | 1 |
| protein modification by small protein conjugation            | 0 | 0 | 0 | 0 | 0 | 0 | -2,9454 | 1 |
| cellular response to stimulus                                | 0 | 0 | 0 | 0 | 0 | 0 | -2,93   | 1 |
| nucleocytoplasmic transport NuRD complex                     | 0 | 0 | 0 | 0 | 0 | 0 | -2,901  | 1 |
| generation of precursor metabolites and energy               | 0 | 0 | 0 | 0 | 0 | 0 | -2,8344 | 1 |
| peptidyl-serine phosphorylation                              | 0 | 0 | 0 | 0 | 0 | 0 | -2,8314 | 1 |
| nuclear transport                                            | 0 | 0 | 0 | 0 | 0 | 0 | -2,8159 | 1 |
| Golgi apparatus                                              | 0 | 0 | 0 | 0 | 0 | 0 | -2,8005 | 1 |
| ribonucleotide metabolic process                             | 0 | 0 | 0 | 0 | 0 | 0 | -2,7799 | 1 |
| translation factor activity, nucleic acid binding            | 0 | 0 | 0 | 0 | 0 | 0 | -2,7071 | 1 |
| purine ribonucleotide metabolic process                      | 0 | 0 | 0 | 0 | 0 | 0 | -2,6892 | 1 |
| proteasomal ubiquitin-dependent protein catabolic process    | 0 | 0 | 0 | 0 | 0 | 0 | -2,6755 | 1 |
| chromatin                                                    | 0 | 0 | 0 | 0 | 0 | 0 | -2,65   | 1 |
| translational initiation                                     | 0 | 0 | 0 | 0 | 0 | 0 | -2,65   | 1 |
| protein import into nucleus, translocation                   | 0 | 0 | 0 | 0 | 0 | 0 | -2,6366 | 1 |
| nucleolus                                                    | 0 | 0 | 0 | 0 | 0 | 0 | -2,5982 | 1 |
| proteasomal protein catabolic process                        | 0 | 0 | 0 | 0 | 0 | 0 | -2,5665 | 1 |
| protein targeting                                            | 0 | 0 | 0 | 0 | 0 | 0 | -2,5511 | 1 |
| regulation of cellular catabolic process                     | 0 | 0 | 0 | 0 | 0 | 0 | -2,5476 | 1 |
| small conjugating protein ligase activity                    | 0 | 0 | 0 | 0 | 0 | 0 | -2,514  | 1 |
| protein modification by small protein conjugation or removal | 0 | 0 | 0 | 0 | 0 | 0 | -2,5053 | 1 |
| proton-transporting two-sector ATPase complex                | 0 | 0 | 0 | 0 | 0 | 0 | -2,5053 | 1 |
| translation initiation factor activity                       | 0 | 0 | 0 | 0 | 0 | 0 | -2,4763 | 1 |
| regulation of T cell mediated immunity                       | 0 | 0 | 0 | 0 | 0 | 0 | -2,4763 | 1 |
| transcription coactivator activity                           | 0 | 0 | 0 | 0 | 0 | 0 | -2,4647 | 1 |
| protein catabolic process                                    | 0 | 0 | 0 | 0 | 0 | 0 | -2,4212 | 1 |
| I-kappaB kinase/NF-kappaB cascade                            | 0 | 0 | 0 | 0 | 0 | 0 | -2,4089 | 1 |
| protein ubiquitination                                       | 0 | 0 | 0 | 0 | 0 | 0 | -2,3803 | 1 |

|                                                                                                                                                  |   |   |   |   |   |   |         |   |
|--------------------------------------------------------------------------------------------------------------------------------------------------|---|---|---|---|---|---|---------|---|
| protein serine/threonine phosphatase activity                                                                                                    | 0 | 0 | 0 | 0 | 0 | 0 | -2,3803 | 1 |
| response to molecule of bacterial origin                                                                                                         | 0 | 0 | 0 | 0 | 0 | 0 | -2,3555 | 1 |
| response to DNA damage stimulus                                                                                                                  | 0 | 0 | 0 | 0 | 0 | 0 | -2,3482 | 1 |
| endomembrane system cellular localization                                                                                                        | 0 | 0 | 0 | 0 | 0 | 0 | -2,3216 | 1 |
| intracellular receptor mediated signaling pathway                                                                                                | 0 | 0 | 0 | 0 | 0 | 0 | -2,2926 | 1 |
| zinc ion transmembrane transport                                                                                                                 | 0 | 0 | 0 | 0 | 0 | 0 | -2,2858 | 1 |
| large ribosomal subunit                                                                                                                          | 0 | 0 | 0 | 0 | 0 | 0 | -2,2728 | 1 |
| response to lipopolysaccharide                                                                                                                   | 0 | 0 | 0 | 0 | 0 | 0 | -2,2728 | 1 |
| ER overload response                                                                                                                             | 0 | 0 | 0 | 0 | 0 | 0 | -2,2704 | 1 |
| regulation of gene expression, epigenetic                                                                                                        | 0 | 0 | 0 | 0 | 0 | 0 | -2,2494 | 1 |
| hydrogen ion transmembrane transporter activity                                                                                                  | 0 | 0 | 0 | 0 | 0 | 0 | -2,2343 | 1 |
| structural molecule activity                                                                                                                     | 0 | 0 | 0 | 0 | 0 | 0 | -2,2343 | 1 |
| production of molecular mediator of immune response                                                                                              | 0 | 0 | 0 | 0 | 0 | 0 | -2,2028 | 1 |
| regulation of Ras GTPase activity                                                                                                                | 0 | 0 | 0 | 0 | 0 | 0 | -2,2028 | 1 |
| lysine N-methyltransferase activity                                                                                                              | 0 | 0 | 0 | 0 | 0 | 0 | -2,176  | 1 |
| negative regulation of adaptive immune response                                                                                                  | 0 | 0 | 0 | 0 | 0 | 0 | -2,176  | 1 |
| histone-lysine N-methyltransferase activity                                                                                                      | 0 | 0 | 0 | 0 | 0 | 0 | -2,176  | 1 |
| histone lysine methylation                                                                                                                       | 0 | 0 | 0 | 0 | 0 | 0 | -2,176  | 1 |
| negative regulation of adaptive immune response based on somatic recombination of immune receptors built from immunoglobulin superfamily domains | 0 | 0 | 0 | 0 | 0 | 0 | -2,176  | 1 |
| protein-lysine N-methyltransferase activity                                                                                                      | 0 | 0 | 0 | 0 | 0 | 0 | -2,176  | 1 |
| response to dsRNA                                                                                                                                | 0 | 0 | 0 | 0 | 0 | 0 | -2,1549 | 1 |
| receptor signaling protein activity                                                                                                              | 0 | 0 | 0 | 0 | 0 | 0 | -2,0957 | 1 |
| Golgi membrane                                                                                                                                   | 0 | 0 | 0 | 0 | 0 | 0 | -2,086  | 1 |
| protein heterooligomerization                                                                                                                    | 0 | 0 | 0 | 0 | 0 | 0 | -2,0833 | 1 |
| peptidyl-serine modification                                                                                                                     | 0 | 0 | 0 | 0 | 0 | 0 | -2,0824 | 1 |
| cellular response to extracellular stimulus                                                                                                      | 0 | 0 | 0 | 0 | 0 | 0 | -2,059  | 1 |
| nucleotidyltransferase activity                                                                                                                  | 0 | 0 | 0 | 0 | 0 | 0 | -2,0417 | 1 |
| Golgi apparatus part                                                                                                                             | 0 | 0 | 0 | 0 | 0 | 0 | -2,0324 | 1 |
| protein localization in nucleus                                                                                                                  | 0 | 0 | 0 | 0 | 0 | 0 | -2,0087 | 1 |
| peptidyl-lysine modification                                                                                                                     | 0 | 0 | 0 | 0 | 0 | 0 | -2,0071 | 1 |
| cellular carbohydrate metabolic process                                                                                                          | 0 | 0 | 0 | 0 | 0 | 0 | -2,0032 | 1 |

|                                                              |   |   |   |   |   |           |   |
|--------------------------------------------------------------|---|---|---|---|---|-----------|---|
| transport                                                    | 0 | 0 | 0 | 0 | 0 | 0 -2,0007 | 1 |
| response to muramyl dipeptide                                | 0 | 0 | 0 | 0 | 0 | 0 -2,0007 | 1 |
| regulation of translational elongation                       | 0 | 0 | 0 | 0 | 0 | 0 -2,0007 | 1 |
| signal recognition particle, endoplasmic reticulum targeting | 0 | 0 | 0 | 0 | 0 | 0 -2,0007 | 1 |
| signal recognition particle                                  | 0 | 0 | 0 | 0 | 0 | 0 -2,0007 | 1 |
| ubiquitin-protein ligase activity                            | 0 | 0 | 0 | 0 | 0 | 0 -1,9998 | 1 |
| cellular response to external stimulus                       | 0 | 0 | 0 | 0 | 0 | 0 -1,9967 | 1 |
| heparan sulfate proteoglycan metabolic process               | 0 | 0 | 0 | 0 | 0 | 0 -1,9804 | 1 |
| nuclear periphery                                            | 0 | 0 | 0 | 0 | 0 | 0 -1,9646 | 1 |
| heat shock protein binding                                   | 0 | 0 | 0 | 0 | 0 | 0 -1,9539 | 1 |
| response to endoplasmic reticulum stress                     | 0 | 0 | 0 | 0 | 0 | 0 -1,9233 | 1 |
| maintenance of location                                      | 0 | 0 | 0 | 0 | 0 | 0 -1,9176 | 1 |
| gene silencing                                               | 0 | 0 | 0 | 0 | 0 | 0 -1,9176 | 1 |
| endoplasmic reticulum establishment of localization          | 0 | 0 | 0 | 0 | 0 | 0 -1,8977 | 1 |
| steroid hormone receptor signaling pathway                   | 0 | 0 | 0 | 0 | 0 | 0 -1,8826 | 1 |
| histone acetyltransferase activity                           | 0 | 0 | 0 | 0 | 0 | 0 -1,8772 | 1 |
| lysine N-acetyltransferase activity                          | 0 | 0 | 0 | 0 | 0 | 0 -1,8772 | 1 |
| translational elongation                                     | 0 | 0 | 0 | 0 | 0 | 0 -1,8772 | 1 |
| ribonucleotide catabolic process                             | 0 | 0 | 0 | 0 | 0 | 0 -1,8768 | 1 |
| response to exogenous dsRNA                                  | 0 | 0 | 0 | 0 | 0 | 0 -1,8726 | 1 |
| B cell apoptosis                                             | 0 | 0 | 0 | 0 | 0 | 0 -1,8726 | 1 |
| nucleoside triphosphate biosynthetic process                 | 0 | 0 | 0 | 0 | 0 | 0 -1,8726 | 1 |
| mitochondrial proton-transporting ATP synthase complex       | 0 | 0 | 0 | 0 | 0 | 0 -1,8726 | 1 |
| B cell receptor signaling pathway                            | 0 | 0 | 0 | 0 | 0 | 0 -1,8726 | 1 |
| establishment of localization in cell                        | 0 | 0 | 0 | 0 | 0 | 0 -1,8726 | 1 |
| ligase activity, forming carbon-nitrogen bonds               | 0 | 0 | 0 | 0 | 0 | 0 -1,8726 | 1 |
| zinc ion transmembrane transporter activity                  | 0 | 0 | 0 | 0 | 0 | 0 -1,8726 | 1 |
| nuclear inner membrane                                       | 0 | 0 | 0 | 0 | 0 | 0 -1,8726 | 1 |
| immunoglobulin production                                    | 0 | 0 | 0 | 0 | 0 | 0 -1,8609 | 1 |
| regulation of Rho GTPase activity                            | 0 | 0 | 0 | 0 | 0 | 0 -1,8608 | 1 |
| regulation of T cell mediated cytotoxicity                   | 0 | 0 | 0 | 0 | 0 | 0 -1,8608 | 1 |
| acid-amino acid ligase activity                              | 0 | 0 | 0 | 0 | 0 | 0 -1,8508 | 1 |

|                                                                                        |   |   |   |   |   |   |         |   |
|----------------------------------------------------------------------------------------|---|---|---|---|---|---|---------|---|
| chromatin assembly or disassembly                                                      | 0 | 0 | 0 | 0 | 0 | 0 | -1,8465 | 1 |
| ubiquitin-dependent protein catabolic process                                          | 0 | 0 | 0 | 0 | 0 | 0 | -1,8282 | 1 |
| hydrolase activity, acting on carbon-nitrogen (but not peptide) bonds                  | 0 | 0 | 0 | 0 | 0 | 0 | -1,8215 | 1 |
| Ral GTPase binding                                                                     | 0 | 0 | 0 | 0 | 0 | 0 | -1,8125 | 1 |
| post-embryonic camera-type eye morphogenesis                                           | 0 | 0 | 0 | 0 | 0 | 0 | -1,8125 | 1 |
| positive regulation of protein export from nucleus                                     | 0 | 0 | 0 | 0 | 0 | 0 | -1,8125 | 1 |
| histone H4-K20 methylation                                                             | 0 | 0 | 0 | 0 | 0 | 0 | -1,8125 | 1 |
| T cell proliferation involved in immune response                                       | 0 | 0 | 0 | 0 | 0 | 0 | -1,8125 | 1 |
| histone methyltransferase activity (H4-K20 specific)                                   | 0 | 0 | 0 | 0 | 0 | 0 | -1,8125 | 1 |
| histone methyltransferase activity                                                     | 0 | 0 | 0 | 0 | 0 | 0 | -1,8121 | 1 |
| purine nucleoside triphosphate catabolic process                                       | 0 | 0 | 0 | 0 | 0 | 0 | -1,7885 | 1 |
| purine ribonucleotide biosynthetic process                                             | 0 | 0 | 0 | 0 | 0 | 0 | -1,7837 | 1 |
| hydrolase activity, acting on ester bonds                                              | 0 | 0 | 0 | 0 | 0 | 0 | -1,7671 | 1 |
| purine ribonucleotide catabolic process                                                | 0 | 0 | 0 | 0 | 0 | 0 | -1,7579 | 1 |
| protein import into nucleus                                                            | 0 | 0 | 0 | 0 | 0 | 0 | -1,7391 | 1 |
| histone methylation                                                                    | 0 | 0 | 0 | 0 | 0 | 0 | -1,7334 | 1 |
| protein localization in organelle                                                      | 0 | 0 | 0 | 0 | 0 | 0 | -1,7225 | 1 |
| nucleobase, nucleoside, nucleotide kinase activity                                     | 0 | 0 | 0 | 0 | 0 | 0 | -1,717  | 1 |
| positive regulation of T cell mediated cytotoxicity                                    | 0 | 0 | 0 | 0 | 0 | 0 | -1,7157 | 1 |
| mannosidase activity                                                                   | 0 | 0 | 0 | 0 | 0 | 0 | -1,7157 | 1 |
| nucleoside triphosphate catabolic process                                              | 0 | 0 | 0 | 0 | 0 | 0 | -1,6977 | 1 |
| mannosyl-oligosaccharide mannosidase activity                                          | 0 | 0 | 0 | 0 | 0 | 0 | -1,6927 | 1 |
| regulation of GTPase activity                                                          | 0 | 0 | 0 | 0 | 0 | 0 | -1,6927 | 1 |
| ribonucleoside triphosphate biosynthetic process                                       | 0 | 0 | 0 | 0 | 0 | 0 | -1,6927 | 1 |
| ribonucleotide biosynthetic process                                                    | 0 | 0 | 0 | 0 | 0 | 0 | -1,6927 | 1 |
| regulation of GTP catabolic process                                                    | 0 | 0 | 0 | 0 | 0 | 0 | -1,6927 | 1 |
| nuclear import                                                                         | 0 | 0 | 0 | 0 | 0 | 0 | -1,6927 | 1 |
| modification-dependent protein catabolic process                                       | 0 | 0 | 0 | 0 | 0 | 0 | -1,6927 | 1 |
| protein insertion into membrane modification-dependent macromolecule catabolic process | 0 | 0 | 0 | 0 | 0 | 0 | -1,6927 | 1 |

|                                                                         |   |   |   |   |   |   |         |   |
|-------------------------------------------------------------------------|---|---|---|---|---|---|---------|---|
| purine ribonucleoside triphosphate biosynthetic process                 | 0 | 0 | 0 | 0 | 0 | 0 | -1,6927 | 1 |
| VCB complex                                                             | 0 | 0 | 0 | 0 | 0 | 0 | -1,6927 | 1 |
| endoplasmic reticulum calcium ion homeostasis                           | 0 | 0 | 0 | 0 | 0 | 0 | -1,6927 | 1 |
| glycoprotein biosynthetic process                                       | 0 | 0 | 0 | 0 | 0 | 0 | -1,6677 | 1 |
| protein amino acid acetylation                                          | 0 | 0 | 0 | 0 | 0 | 0 | -1,6677 | 1 |
| histone acetylation                                                     | 0 | 0 | 0 | 0 | 0 | 0 | -1,6677 | 1 |
| small molecule metabolic process                                        | 0 | 0 | 0 | 0 | 0 | 0 | -1,6594 | 1 |
| purine nucleoside triphosphate biosynthetic process                     | 0 | 0 | 0 | 0 | 0 | 0 | -1,648  | 1 |
| regulation of I-kappaB kinase/NF-kappaB cascade                         | 0 | 0 | 0 | 0 | 0 | 0 | -1,648  | 1 |
| ribonucleoprotein complex biogenesis                                    | 0 | 0 | 0 | 0 | 0 | 0 | -1,6415 | 1 |
| nucleoside diphosphate metabolic process                                | 0 | 0 | 0 | 0 | 0 | 0 | -1,6119 | 1 |
| DNA packaging                                                           | 0 | 0 | 0 | 0 | 0 | 0 | -1,6059 | 1 |
| ATP binding                                                             | 0 | 0 | 0 | 0 | 0 | 0 | -1,5854 | 1 |
| phospholipid binding                                                    | 0 | 0 | 0 | 0 | 0 | 0 | -1,5712 | 1 |
| rRNA transcription                                                      | 0 | 0 | 0 | 0 | 0 | 0 | -1,5695 | 1 |
| retinoic acid receptor binding                                          | 0 | 0 | 0 | 0 | 0 | 0 | -1,5695 | 1 |
| regulation of proteasomal ubiquitin-dependent protein catabolic process | 0 | 0 | 0 | 0 | 0 | 0 | -1,5685 | 1 |
| regulation of isotype switching                                         | 0 | 0 | 0 | 0 | 0 | 0 | -1,5685 | 1 |
| hydrogen-exporting ATPase activity, phosphorylative mechanism           | 0 | 0 | 0 | 0 | 0 | 0 | -1,5685 | 1 |
| chromosome                                                              | 0 | 0 | 0 | 0 | 0 | 0 | -1,555  | 1 |
| ATP biosynthetic process                                                | 0 | 0 | 0 | 0 | 0 | 0 | -1,5492 | 1 |
| double-stranded DNA binding                                             | 0 | 0 | 0 | 0 | 0 | 0 | -1,5482 | 1 |
| ubiquitin ligase complex                                                | 0 | 0 | 0 | 0 | 0 | 0 | -1,529  | 1 |
| receptor signaling protein serine/threonine kinase activity             | 0 | 0 | 0 | 0 | 0 | 0 | -1,529  | 1 |
| N-methyltransferase activity                                            | 0 | 0 | 0 | 0 | 0 | 0 | -1,4853 | 1 |
| regulation of proteolysis                                               | 0 | 0 | 0 | 0 | 0 | 0 | -1,4853 | 1 |
| proteasome core complex                                                 | 0 | 0 | 0 | 0 | 0 | 0 | -1,4834 | 1 |
| T cell mediated cytotoxicity                                            | 0 | 0 | 0 | 0 | 0 | 0 | -1,4834 | 1 |
| ribosome biogenesis                                                     | 0 | 0 | 0 | 0 | 0 | 0 | -1,4771 | 1 |
| ribonucleoprotein binding                                               | 0 | 0 | 0 | 0 | 0 | 0 | -1,4633 | 1 |
| ATPase activity, coupled to transmembrane movement of ions              | 0 | 0 | 0 | 0 | 0 | 0 | -1,4486 | 1 |
| regulation of protein catabolic process                                 | 0 | 0 | 0 | 0 | 0 | 0 | -1,445  | 1 |
| nuclear DNA-directed RNA polymerase complex                             | 0 | 0 | 0 | 0 | 0 | 0 | -1,4392 | 1 |
| nucleoside diphosphate biosynthetic process                             | 0 | 0 | 0 | 0 | 0 | 0 | -1,4392 | 1 |



|                                                                                                                                                  |   |   |   |   |   |   |         |   |
|--------------------------------------------------------------------------------------------------------------------------------------------------|---|---|---|---|---|---|---------|---|
| cytoplasmic ubiquitin ligase complex                                                                                                             | 0 | 0 | 0 | 0 | 0 | 0 | -1,4392 | 1 |
| DNA-directed RNA polymerase complex                                                                                                              | 0 | 0 | 0 | 0 | 0 | 0 | -1,4392 | 1 |
| regulation of protein export from nucleus                                                                                                        | 0 | 0 | 0 | 0 | 0 | 0 | -1,4392 | 1 |
| SUMO ligase activity                                                                                                                             | 0 | 0 | 0 | 0 | 0 | 0 | -1,4392 | 1 |
| negative regulation of T cell mediated immunity                                                                                                  | 0 | 0 | 0 | 0 | 0 | 0 | -1,4392 | 1 |
| cytosolic large ribosomal subunit                                                                                                                | 0 | 0 | 0 | 0 | 0 | 0 | -1,4392 | 1 |
| heparan sulfate proteoglycan biosynthetic process                                                                                                | 0 | 0 | 0 | 0 | 0 | 0 | -1,4392 | 1 |
| regulation of protein kinase B signaling cascade                                                                                                 | 0 | 0 | 0 | 0 | 0 | 0 | -1,4317 | 1 |
| proton-transporting ATP synthase complex                                                                                                         | 0 | 0 | 0 | 0 | 0 | 0 | -1,4317 | 1 |
| regulation of purine nucleotide catabolic process                                                                                                | 0 | 0 | 0 | 0 | 0 | 0 | -1,4317 | 1 |
| 'de novo' posttranslational protein folding                                                                                                      | 0 | 0 | 0 | 0 | 0 | 0 | -1,4317 | 1 |
| regulation of histone modification                                                                                                               | 0 | 0 | 0 | 0 | 0 | 0 | -1,4317 | 1 |
| regulation of proteasomal protein catabolic process                                                                                              | 0 | 0 | 0 | 0 | 0 | 0 | -1,4317 | 1 |
| 'de novo' protein folding                                                                                                                        | 0 | 0 | 0 | 0 | 0 | 0 | -1,4317 | 1 |
| regulation of nucleotide catabolic process                                                                                                       | 0 | 0 | 0 | 0 | 0 | 0 | -1,4317 | 1 |
| carbohydrate metabolic process                                                                                                                   | 0 | 0 | 0 | 0 | 0 | 0 | -1,4163 | 1 |
| erythrocyte differentiation                                                                                                                      | 0 | 0 | 0 | 0 | 0 | 0 | -1,4147 | 1 |
| DNA conformation change                                                                                                                          | 0 | 0 | 0 | 0 | 0 | 0 | -1,4063 | 1 |
| positive regulation of cell cycle arrest                                                                                                         | 0 | 0 | 0 | 0 | 0 | 0 | -1,4049 | 1 |
| integral to nuclear inner membrane                                                                                                               | 0 | 0 | 0 | 0 | 0 | 0 | -1,4049 | 1 |
| negative regulation of T-helper 2 type immune response                                                                                           | 0 | 0 | 0 | 0 | 0 | 0 | -1,4049 | 1 |
| protein amino acid acylation                                                                                                                     | 0 | 0 | 0 | 0 | 0 | 0 | -1,4049 | 1 |
| positive regulation of adaptive immune response based on somatic recombination of immune receptors built from immunoglobulin superfamily domains | 0 | 0 | 0 | 0 | 0 | 0 | -1,4049 | 1 |
| negative regulation of protein metabolic process                                                                                                 | 0 | 0 | 0 | 0 | 0 | 0 | -1,4049 | 1 |
| response to peptidoglycan                                                                                                                        | 0 | 0 | 0 | 0 | 0 | 0 | -1,4049 | 1 |
| N-glycan processing                                                                                                                              | 0 | 0 | 0 | 0 | 0 | 0 | -1,4049 | 1 |
| hypusine metabolic process                                                                                                                       | 0 | 0 | 0 | 0 | 0 | 0 | -1,4049 | 1 |
| eukaryotic initiation factor 4E binding                                                                                                          | 0 | 0 | 0 | 0 | 0 | 0 | -1,4049 | 1 |
| macromolecule methylation                                                                                                                        | 0 | 0 | 0 | 0 | 0 | 0 | -1,4049 | 1 |
| acrosome assembly                                                                                                                                | 0 | 0 | 0 | 0 | 0 | 0 | -1,4049 | 1 |

|                                                                    |   |   |   |   |   |   |         |   |
|--------------------------------------------------------------------|---|---|---|---|---|---|---------|---|
| regulation of cell cycle arrest                                    | 0 | 0 | 0 | 0 | 0 | 0 | -1,4049 | 1 |
| regulation of glucocorticoid metabolic process                     | 0 | 0 | 0 | 0 | 0 | 0 | -1,4049 | 1 |
| 7S RNA binding                                                     | 0 | 0 | 0 | 0 | 0 | 0 | -1,4049 | 1 |
| phosphopyruvate hydratase activity                                 | 0 | 0 | 0 | 0 | 0 | 0 | -1,4049 | 1 |
| TATA-binding protein binding                                       | 0 | 0 | 0 | 0 | 0 | 0 | -1,4049 | 1 |
| corticosteroid receptor signaling pathway                          | 0 | 0 | 0 | 0 | 0 | 0 | -1,4049 | 1 |
| thrombin receptor activity                                         | 0 | 0 | 0 | 0 | 0 | 0 | -1,4049 | 1 |
| negative regulation of alpha-beta T cell proliferation             | 0 | 0 | 0 | 0 | 0 | 0 | -1,4049 | 1 |
| DNA-directed RNA polymerase I complex                              | 0 | 0 | 0 | 0 | 0 | 0 | -1,4049 | 1 |
| positive regulation of adaptive immune response                    | 0 | 0 | 0 | 0 | 0 | 0 | -1,4049 | 1 |
| snRNA binding                                                      | 0 | 0 | 0 | 0 | 0 | 0 | -1,4049 | 1 |
| signal peptide processing                                          | 0 | 0 | 0 | 0 | 0 | 0 | -1,4049 | 1 |
| post-embryonic eye morphogenesis                                   | 0 | 0 | 0 | 0 | 0 | 0 | -1,4049 | 1 |
| positive regulation of antigen receptor-mediated signaling pathway | 0 | 0 | 0 | 0 | 0 | 0 | -1,4049 | 1 |
| peptidyl-lysine modification to hypusine                           | 0 | 0 | 0 | 0 | 0 | 0 | -1,4049 | 1 |
| intrinsic to nuclear inner membrane                                | 0 | 0 | 0 | 0 | 0 | 0 | -1,4049 | 1 |
| protein amino acid deacetylation                                   | 0 | 0 | 0 | 0 | 0 | 0 | -1,4013 | 1 |
| threonine-type peptidase activity                                  | 0 | 0 | 0 | 0 | 0 | 0 | -1,4013 | 1 |
| threonine-type endopeptidase activity                              | 0 | 0 | 0 | 0 | 0 | 0 | -1,4013 | 1 |
| magnesium ion binding                                              | 0 | 0 | 0 | 0 | 0 | 0 | -1,4006 | 1 |
| negative regulation of cellular protein metabolic process          | 0 | 0 | 0 | 0 | 0 | 0 | -1,4004 | 1 |
| nuclear membrane cellular polysaccharide biosynthetic process      | 0 | 0 | 0 | 0 | 0 | 0 | -1,3993 | 1 |
| intrinsic to Golgi membrane                                        | 0 | 0 | 0 | 0 | 0 | 0 | -1,3993 | 1 |
| cellular response to molecule of bacterial origin                  | 0 | 0 | 0 | 0 | 0 | 0 | -1,3993 | 1 |
| integral to Golgi membrane                                         | 0 | 0 | 0 | 0 | 0 | 0 | -1,3993 | 1 |
| positive regulation of translation                                 | 0 | 0 | 0 | 0 | 0 | 0 | -1,3928 | 1 |
| protein kinase B signaling cascade                                 | 0 | 0 | 0 | 0 | 0 | 0 | -1,3928 | 1 |
| negative regulation of cell cycle                                  | 0 | 0 | 0 | 0 | 0 | 0 | -1,3844 | 1 |
| proteasome complex                                                 | 0 | 0 | 0 | 0 | 0 | 0 | -1,3828 | 1 |
| negative regulation of T cell activation                           | 0 | 0 | 0 | 0 | 0 | 0 | -1,3809 | 1 |
| MAPKKK cascade                                                     | 0 | 0 | 0 | 0 | 0 | 0 | -1,3809 | 1 |

|                                                                                         |   |   |   |   |   |   |         |    |
|-----------------------------------------------------------------------------------------|---|---|---|---|---|---|---------|----|
| polysaccharide biosynthetic process                                                     | 0 | 0 | 0 | 0 | 0 | 0 | -1,3809 | 1  |
| regulation of intracellular protein transport                                           | 0 | 0 | 0 | 0 | 0 | 0 | -1,3809 | 1  |
| lipid binding                                                                           | 0 | 0 | 0 | 0 | 0 | 0 | -1,3745 | 1  |
| glycoprotein metabolic process                                                          | 0 | 0 | 0 | 0 | 0 | 0 | -1,3745 | 1  |
| adenyl ribonucleotide binding                                                           | 0 | 0 | 0 | 0 | 0 | 0 | -1,3421 | 1  |
| hydrolase activity, acting on carbon-nitrogen (but not peptide) bonds, in linear amides | 0 | 0 | 0 | 0 | 0 | 0 | -1,3365 | 1  |
| positive regulation of T cell mediated immunity                                         | 0 | 0 | 0 | 0 | 0 | 0 | -1,3343 | 1  |
| embryonic eye morphogenesis                                                             | 0 | 0 | 0 | 0 | 0 | 0 | -1,3343 | 1  |
| lipopolysaccharide-mediated signaling pathway                                           | 0 | 0 | 0 | 0 | 0 | 0 | -1,3343 | 1  |
| regulation of RNA stability                                                             | 0 | 0 | 0 | 0 | 0 | 0 | -1,3343 | 1  |
| rRNA processing                                                                         | 0 | 0 | 0 | 0 | 0 | 0 | -1,331  | 1  |
| rRNA metabolic process                                                                  | 0 | 0 | 0 | 0 | 0 | 0 | -1,331  | 1  |
| ATP synthesis coupled proton transport                                                  | 0 | 0 | 0 | 0 | 0 | 0 | -1,3221 | 1  |
| energy coupled proton transport, down electrochemical gradient                          | 0 | 0 | 0 | 0 | 0 | 0 | -1,3221 | 1  |
| nuclear export                                                                          | 0 | 0 | 0 | 0 | 0 | 0 | -1,3052 | 1  |
| regulation of peptidyl-serine phosphorylation                                           | 0 | 0 | 0 | 0 | 0 | 0 | -1,3052 | 1  |
| iron ion binding                                                                        | 0 | 0 | 0 | 0 | 0 | 0 | -1,3019 | -1 |
| postsynaptic membrane development of primary sexual characteristics                     | 0 | 0 | 0 | 0 | 0 | 0 | -1,3104 | -1 |
| embryonic organ morphogenesis                                                           | 0 | 0 | 0 | 0 | 0 | 0 | -1,346  | -1 |
| metallopeptidase activity                                                               | 0 | 0 | 0 | 0 | 0 | 0 | -1,3475 | -1 |
| ear development                                                                         | 0 | 0 | 0 | 0 | 0 | 0 | -1,3745 | -1 |
| serine-type peptidase activity                                                          | 0 | 0 | 0 | 0 | 0 | 0 | -1,3828 | -1 |
| pattern specification process                                                           | 0 | 0 | 0 | 0 | 0 | 0 | -1,4049 | -1 |
| hormone activity                                                                        | 0 | 0 | 0 | 0 | 0 | 0 | -1,4139 | -1 |
| cytokine activity                                                                       | 0 | 0 | 0 | 0 | 0 | 0 | -1,4154 | -1 |
| regulation of cAMP metabolic process                                                    | 0 | 0 | 0 | 0 | 0 | 0 | -1,4171 | -1 |
| potassium ion transport                                                                 | 0 | 0 | 0 | 0 | 0 | 0 | -1,4177 | -1 |
| heme binding                                                                            | 0 | 0 | 0 | 0 | 0 | 0 | -1,4317 | -1 |
| serine hydrolase activity                                                               | 0 | 0 | 0 | 0 | 0 | 0 | -1,4357 | -1 |
| nucleoside monophosphate biosynthetic process                                           | 0 | 0 | 0 | 0 | 0 | 0 | -1,4392 | -1 |
| axon guidance                                                                           | 0 | 0 | 0 | 0 | 0 | 0 | -1,4486 | -1 |
| G-protein signaling, coupled to cAMP nucleotide second messenger                        | 0 | 0 | 0 | 0 | 0 | 0 | -1,4645 | -1 |
| epithelial cell differentiation                                                         | 0 | 0 | 0 | 0 | 0 | 0 | -1,4814 | -1 |
| regionalization                                                                         | 0 | 0 | 0 | 0 | 0 | 0 | -1,497  | -1 |
| cation channel complex                                                                  | 0 | 0 | 0 | 0 | 0 | 0 | -1,544  | -1 |
|                                                                                         | 0 | 0 | 0 | 0 | 0 | 0 | -1,5482 | -1 |

|                                                                    |   |   |   |   |         |    |         |    |
|--------------------------------------------------------------------|---|---|---|---|---------|----|---------|----|
| serine-type endopeptidase inhibitor activity                       | 0 | 0 | 0 | 0 | 0       | 0  | -1,5482 | -1 |
| regulation of adenylate cyclase activity                           | 0 | 0 | 0 | 0 | 0       | 0  | -1,5545 | -1 |
| monooxygenase activity                                             | 0 | 0 | 0 | 0 | 0       | 0  | -1,6211 | -1 |
| regulation of cyclase activity                                     | 0 | 0 | 0 | 0 | 0       | 0  | -1,6284 | -1 |
| regulation of lyase activity                                       | 0 | 0 | 0 | 0 | 0       | 0  | -1,6284 | -1 |
| neuron development                                                 | 0 | 0 | 0 | 0 | 0       | 0  | -1,648  | -1 |
| tetrapyrrole binding                                               | 0 | 0 | 0 | 0 | 0       | 0  | -1,6517 | -1 |
| potassium channel activity                                         | 0 | 0 | 0 | 0 | 0       | 0  | -1,6754 | -1 |
| sugar binding                                                      | 0 | 0 | 0 | 0 | 0       | 0  | -1,6761 | -1 |
| G-protein signaling, coupled to cyclic nucleotide second messenger | 0 | 0 | 0 | 0 | 0       | 0  | -1,7225 | -1 |
| behavior                                                           | 0 | 0 | 0 | 0 | 0       | 0  | -1,7463 | -1 |
| proteinaceous extracellular matrix                                 | 0 | 0 | 0 | 0 | 0       | 0  | -1,7463 | -1 |
| voltage-gated channel activity                                     | 0 | 0 | 0 | 0 | 0       | 0  | -1,7826 | -1 |
| voltage-gated ion channel activity                                 | 0 | 0 | 0 | 0 | 0       | 0  | -1,7826 | -1 |
| voltage-gated cation channel activity                              | 0 | 0 | 0 | 0 | 0       | 0  | -1,8125 | -1 |
| nucleoside monophosphate metabolic process                         | 0 | 0 | 0 | 0 | 0       | 0  | -1,8154 | -1 |
| carbohydrate binding                                               | 0 | 0 | 0 | 0 | 0       | 0  | -1,8296 | -1 |
| endopeptidase regulator activity                                   | 0 | 0 | 0 | 0 | 0       | 0  | -1,8635 | -1 |
| generation of neurons                                              | 0 | 0 | 0 | 0 | 0       | 0  | -1,898  | -1 |
| extracellular space                                                | 0 | 0 | 0 | 0 | 0       | 0  | -1,898  | -1 |
| cAMP metabolic process                                             | 0 | 0 | 0 | 0 | 0       | 0  | -1,9804 | -1 |
| central nervous system neuron differentiation                      | 0 | 0 | 0 | 0 | 0       | 0  | -2,0087 | -1 |
| gated channel activity                                             | 0 | 0 | 0 | 0 | 0       | 0  | -2,012  | -1 |
| neurogenesis                                                       | 0 | 0 | 0 | 0 | 0       | 0  | -2,0459 | -1 |
| endopeptidase inhibitor activity                                   | 0 | 0 | 0 | 0 | 0       | 0  | -2,1833 | -1 |
| intermediate filament                                              | 0 | 0 | 0 | 0 | 0       | 0  | -2,2858 | -1 |
| enzyme inhibitor activity                                          | 0 | 0 | 0 | 0 | 0       | 0  | -2,4774 | -1 |
| peptidase inhibitor activity                                       | 0 | 0 | 0 | 0 | 0       | 0  | -2,5053 | -1 |
| peptidase regulator activity                                       | 0 | 0 | 0 | 0 | 0       | 0  | -2,5216 | -1 |
| cation channel activity                                            | 0 | 0 | 0 | 0 | 0       | 0  | -2,5345 | -1 |
| cyclic nucleotide metabolic process                                | 0 | 0 | 0 | 0 | 0       | 0  | -2,7631 | -1 |
| neuron differentiation                                             | 0 | 0 | 0 | 0 | 0       | 0  | -2,8573 | -1 |
| intrinsic to plasma membrane                                       | 0 | 0 | 0 | 0 | 0       | 0  | -4,2757 | -1 |
| integral to plasma membrane                                        | 0 | 0 | 0 | 0 | 0       | 0  | -4,3585 | -1 |
| di-, tri-valent inorganic cation transport                         | 0 | 0 | 0 | 0 | -1,3293 | -1 | 0       | 0  |
| intermediate filament cytoskeleton                                 | 0 | 0 | 0 | 0 | -1,3433 | -1 | -2,3791 | -1 |
| central nervous system development                                 | 0 | 0 | 0 | 0 | -1,3788 | -1 | 0       | 0  |
| substrate-specific channel activity                                | 0 | 0 | 0 | 0 | -1,4106 | -1 | -1,8154 | -1 |

|                                                      |         |    |         |    |         |    |         |    |
|------------------------------------------------------|---------|----|---------|----|---------|----|---------|----|
| ion channel activity                                 | 0       | 0  | 0       | 0  | -1,4457 | -1 | -1,6267 | -1 |
| cell adhesion                                        | 0       | 0  | 0       | 0  | -1,4831 | -1 | 0       | 0  |
| biological adhesion                                  | 0       | 0  | 0       | 0  | -1,4831 | -1 | 0       | 0  |
| passive transmembrane transporter activity           | 0       | 0  | 0       | 0  | -1,6201 | -1 | -1,8396 | -1 |
| channel activity                                     | 0       | 0  | 0       | 0  | -1,6201 | -1 | -1,8396 | -1 |
| metal ion transport                                  | 0       | 0  | 0       | 0  | -1,6206 | -1 | 0       | 0  |
| membrane                                             | 0       | 0  | 0       | 0  | -2,4791 | -1 | -3,5516 | -1 |
| membrane part                                        | 0       | 0  | 0       | 0  | -5,0458 | -1 | -8,9586 | -1 |
| multicellular organismal process                     | 0       | 0  | 0       | 0  | -9,7799 | -1 | -12,509 | -1 |
| transporter activity                                 | 0       | 0  | -1,4404 | -1 | 0       | 0  | 0       | 0  |
| intrinsic to membrane                                | 0       | 0  | -1,5018 | -1 | -7,8794 | -1 | -13,745 | -1 |
| extracellular matrix                                 | 0       | 0  | -1,5018 | -1 | 0       | 0  | -1,8852 | -1 |
| lipid catabolic process                              | 0       | 0  | -1,5157 | -1 | 0       | 0  | 0       | 0  |
| cellular amino acid metabolic process                | 0       | 0  | -1,5301 | -1 | 0       | 0  | 0       | 0  |
| integral to membrane                                 | 0       | 0  | -1,5822 | -1 | -8,4698 | -1 | -12,388 | -1 |
| oxidation reduction                                  | 0       | 0  | -1,7047 | -1 | 0       | 0  | 0       | 0  |
| molecular transducer activity                        | 0       | 0  | -1,7195 | -1 | -27,1   | -1 | -20,257 | -1 |
| signal transducer activity                           | 0       | 0  | -1,7195 | -1 | -27,1   | -1 | -20,257 | -1 |
| extracellular region part                            | 0       | 0  | -1,9564 | -1 | 0       | 0  | -3,5107 | -1 |
| cellular_component                                   | 0       | 0  | -2,5964 | -1 | 0       | 0  | 0       | 0  |
| receptor activity                                    | 0       | 0  | -3,5814 | -1 | -27,754 | -1 | -27,108 | -1 |
| extracellular region                                 | 0       | 0  | -4,1267 | -1 | -2,5269 | -1 | -7,9136 | -1 |
| sensory perception of chemical stimulus              | 0       | 0  | -20,234 | -1 | -34,324 | -1 | -55,593 | -1 |
| sensory perception of smell                          | 0       | 0  | -21,53  | -1 | -34,599 | -1 | -54,658 | -1 |
| olfactory receptor activity                          | 0       | 0  | -22,162 | -1 | -35,807 | -1 | -53,987 | -1 |
| system process                                       | -1,4208 | -1 | -13,002 | -1 | -20,959 | -1 | -31,22  | -1 |
| signaling                                            | -1,4741 | -1 | 0       | 0  | -13,149 | -1 | -7,9747 | -1 |
| signal transduction                                  | -1,5096 | -1 | 0       | 0  | -14,775 | -1 | -9,2749 | -1 |
| signal transmission                                  | -1,647  | -1 | 0       | 0  | -13,777 | -1 | -9,5129 | -1 |
| signaling process                                    | -1,6522 | -1 | 0       | 0  | -13,866 | -1 | -9,6003 | -1 |
| neurological system process                          | -1,9209 | -1 | -16,365 | -1 | -23,664 | -1 | -34,51  | -1 |
| signaling pathway                                    | -2,1269 | -1 | -1,4088 | 1  | -14,559 | -1 | -7,2668 | -1 |
| transmembrane receptor activity                      | -2,1269 | -1 | -10,996 | -1 | -31,053 | -1 | -42,359 | -1 |
| cognition                                            | -2,1269 | -1 | -18,318 | -1 | -28,516 | -1 | -38,959 | -1 |
| cell surface receptor linked signaling pathway       | -2,4265 | -1 | 0       | 0  | -20,728 | -1 | -21,947 | -1 |
| sensory perception                                   | -2,4265 | -1 | -18,996 | -1 | -33,599 | -1 | -44,273 | -1 |
| G-protein coupled receptor protein signaling pathway | -3,7687 | -1 | -10,55  | -1 | -34,324 | -1 | -41,678 | -1 |
| G-protein coupled receptor activity                  | -3,9868 | -1 | -16,365 | -1 | -33,599 | -1 | -49,893 | -1 |

**All the enriched immune-related GO categories (the order is the same as in Supplementary Figure 5)**

|              | Cluster 1                   |              | Cluster 2                   |              | Cluster 4                   |              | Cluster 6                   |  |
|--------------|-----------------------------|--------------|-----------------------------|--------------|-----------------------------|--------------|-----------------------------|--|
| log10        |                             | log10        |                             | log10        |                             | log10        |                             |  |
| adj. p-value | Enriched (1), depleted (-1) |  |

|                                                           |         |   |         |   |   |   |         |   |
|-----------------------------------------------------------|---------|---|---------|---|---|---|---------|---|
| T cell differentiation in the thymus                      | -4,3279 | 1 | -2,3982 | 1 | 0 | 0 | 0       | 0 |
| T cell differentiation                                    | -3,6328 | 1 | -7,6655 | 1 | 0 | 0 | 0       | 0 |
| T cell activation                                         | -3,4307 | 1 | -14,227 | 1 | 0 | 0 | -1,4049 | 1 |
| lymphocyte differentiation                                | -3,3074 | 1 | -10,231 | 1 | 0 | 0 | -1,6415 | 1 |
| immune system development                                 | -3,3034 | 1 | -10,611 | 1 | 0 | 0 | -1,7945 | 1 |
| positive regulation of leukocyte mediated immunity        | -2,5732 | 1 | 0       | 0 | 0 | 0 | 0       | 0 |
| positive regulation of lymphocyte mediated immunity       | -2,5732 | 1 | 0       | 0 | 0 | 0 | 0       | 0 |
| hemopoiesis                                               | -2,477  | 1 | -10,057 | 1 | 0 | 0 | -1,8885 | 1 |
| positive regulation of leukocyte mediated cytotoxicity    | -2,4468 | 1 | 0       | 0 | 0 | 0 | -1,7334 | 1 |
| lymphocyte activation                                     | -2,4265 | 1 | -16,365 | 1 | 0 | 0 | -2,1007 | 1 |
| regulation of interleukin-2 biosynthetic process          | -2,4265 | 1 | -2,1499 | 1 | 0 | 0 | 0       | 0 |
| leukocyte differentiation                                 | -2,3826 | 1 | -11,08  | 1 | 0 | 0 | -1,4147 | 1 |
| thymic T cell selection                                   | -2,3451 | 1 | -2,708  | 1 | 0 | 0 | 0       | 0 |
| interleukin-2 biosynthetic process                        | -2,3451 | 1 | -1,9031 | 1 | 0 | 0 | 0       | 0 |
| T cell selection                                          | -2,1269 | 1 | -3,8745 | 1 | 0 | 0 | 0       | 0 |
| regulation of interleukin-2 production                    | -2,1269 | 1 | -2,2057 | 1 | 0 | 0 | 0       | 0 |
| regulation of leukocyte mediated cytotoxicity             | -2,1269 | 1 | 0       | 0 | 0 | 0 | -1,8039 | 1 |
| regulation of NK T cell activation                        | -2,1269 | 1 | 0       | 0 | 0 | 0 | 0       | 0 |
| positive regulation of NK T cell activation               | -2,1269 | 1 | 0       | 0 | 0 | 0 | 0       | 0 |
| NK T cell activation                                      | -2,1269 | 1 | 0       | 0 | 0 | 0 | 0       | 0 |
| positive regulation of immune effector process            | -2,1269 | 1 | 0       | 0 | 0 | 0 | 0       | 0 |
| leukocyte activation                                      | -2,0971 | 1 | -16,222 | 1 | 0 | 0 | -2,3256 | 1 |
| positive regulation of interleukin-2 biosynthetic process | -2,0971 | 1 | -3,0661 | 1 | 0 | 0 | 0       | 0 |
| interleukin-2 production                                  | -1,9397 | 1 | -1,8398 | 1 | 0 | 0 | 0       | 0 |
| regulation of lymphocyte mediated immunity                | -1,9209 | 1 | -1,5508 | 1 | 0 | 0 | -2,5053 | 1 |
| lymphocyte apoptosis                                      | -1,9209 | 1 | 0       | 0 | 0 | 0 | -1,8296 | 1 |
| lymphocyte mediated immunity                              | -1,8893 | 1 | -2,1593 | 1 | 0 | 0 | -1,6897 | 1 |
| leukocyte mediated cytotoxicity                           | -1,8893 | 1 | -1,5397 | 1 | 0 | 0 | -1,352  | 1 |
| interleukin-4 biosynthetic process                        | -1,8893 | 1 | 0       | 0 | 0 | 0 | 0       | 0 |
| negative regulation of thymocyte apoptosis                | -1,8893 | 1 | 0       | 0 | 0 | 0 | 0       | 0 |
| positive regulation of interleukin-4 biosynthetic process | -1,8893 | 1 | 0       | 0 | 0 | 0 | 0       | 0 |
| regulation of interleukin-4 biosynthetic process          | -1,8893 | 1 | 0       | 0 | 0 | 0 | 0       | 0 |

|                                                           |         |   |         |   |         |   |         |   |
|-----------------------------------------------------------|---------|---|---------|---|---------|---|---------|---|
| immune system process                                     | -1,7996 | 1 | -17,807 | 1 | 0       | 0 | -2,1484 | 1 |
| regulation of leukocyte mediated immunity                 | -1,7704 | 1 | -1,3089 | 1 | 0       | 0 | -1,9967 | 1 |
| T cell apoptosis                                          | -1,7175 | 1 | 0       | 0 | 0       | 0 | 0       | 0 |
| regulation of lymphocyte differentiation                  | -1,6012 | 1 | -2,5111 | 1 | 0       | 0 | 0       | 0 |
| regulation of lymphocyte activation                       | -1,5401 | 1 | -7,3045 | 1 | -1,3788 | 1 | 0       | 0 |
| leukocyte mediated immunity                               | -1,5378 | 1 | -2,4313 | 1 | 0       | 0 | 0       | 0 |
| thymocyte apoptosis                                       | -1,5096 | 1 | 0       | 0 | 0       | 0 | 0       | 0 |
| regulation of thymocyte apoptosis                         | -1,5096 | 1 | 0       | 0 | 0       | 0 | 0       | 0 |
| negative regulation of T cell apoptosis                   | -1,4208 | 1 | 0       | 0 | 0       | 0 | 0       | 0 |
| regulation of leukocyte activation                        | -1,4106 | 1 | -6,342  | 1 | 0       | 0 | 0       | 0 |
| T cell homeostasis                                        | -1,3882 | 1 | 0       | 0 | 0       | 0 | 0       | 0 |
| immune effector process                                   | -1,3678 | 1 | -2,4653 | 1 | 0       | 0 | -1,6083 | 1 |
| gamma-delta T cell differentiation                        | -1,3287 | 1 | 0       | 0 | 0       | 0 | 0       | 0 |
| gamma-delta T cell activation                             | -1,3287 | 1 | 0       | 0 | 0       | 0 | 0       | 0 |
| regulation of immune effector process                     | -1,3059 | 1 | -1,7441 | 1 | 0       | 0 | 0       | 0 |
| regulation of immune system process                       | 0       | 0 | -8,5901 | 1 | 0       | 0 | -2,0957 | 1 |
| regulation of T cell activation                           | 0       | 0 | -7,7399 | 1 | 0       | 0 | 0       | 0 |
| positive regulation of T cell activation                  | 0       | 0 | -6,5607 | 1 | -1,4457 | 1 | 0       | 0 |
| positive regulation of immune system process              | 0       | 0 | -6,4012 | 1 | 0       | 0 | -1,9232 | 1 |
| positive regulation of lymphocyte activation              | 0       | 0 | -5,9586 | 1 | -1,3036 | 1 | 0       | 0 |
| positive regulation of leukocyte activation               | 0       | 0 | -5,5171 | 1 | -1,3433 | 1 | 0       | 0 |
| T cell proliferation                                      | 0       | 0 | -4,7545 | 1 | 0       | 0 | 0       | 0 |
| alpha-beta T cell activation                              | 0       | 0 | -4,6234 | 1 | 0       | 0 | 0       | 0 |
| lymphocyte proliferation                                  | 0       | 0 | -4,1506 | 1 | 0       | 0 | -1,334  | 1 |
| alpha-beta T cell differentiation                         | 0       | 0 | -4,0799 | 1 | 0       | 0 | 0       | 0 |
| leukocyte proliferation                                   | 0       | 0 | -3,994  | 1 | 0       | 0 | 0       | 0 |
| T cell receptor complex                                   | 0       | 0 | -3,7161 | 1 | 0       | 0 | 0       | 0 |
| regulation of T cell receptor signaling pathway           | 0       | 0 | -3,6884 | 1 | 0       | 0 | 0       | 0 |
| regulation of immune response                             | 0       | 0 | -3,6443 | 1 | 0       | 0 | -2,4763 | 1 |
| T cell receptor signaling pathway                         | 0       | 0 | -3,5757 | 1 | 0       | 0 | 0       | 0 |
| immune response-activating signal transduction            | 0       | 0 | -3,2524 | 1 | 0       | 0 | -1,9539 | 1 |
| positive regulation of T cell proliferation               | 0       | 0 | -3,2284 | 1 | 0       | 0 | 0       | 0 |
| regulation of antigen receptor-mediated signaling pathway | 0       | 0 | -3,2186 | 1 | 0       | 0 | 0       | 0 |
| alpha-beta T cell receptor complex                        | 0       | 0 | -3,1469 | 1 | 0       | 0 | 0       | 0 |

|                                                                                |   |   |         |   |   |   |         |   |
|--------------------------------------------------------------------------------|---|---|---------|---|---|---|---------|---|
| regulation of T cell proliferation antigen receptor-mediated signaling pathway | 0 | 0 | -3,142  | 1 | 0 | 0 | 0       | 0 |
| positive regulation of alpha-beta T cell activation                            | 0 | 0 | -3,0213 | 1 | 0 | 0 | 0       | 0 |
| immune response-regulating signaling pathway                                   | 0 | 0 | -3,0132 | 1 | 0 | 0 | -2,3854 | 1 |
| immune response                                                                | 0 | 0 | -3,0084 | 1 | 0 | 0 | -2,1422 | 1 |
| regulation of alpha-beta T cell activation                                     | 0 | 0 | -2,9177 | 1 | 0 | 0 | 0       | 0 |
| positive regulation of lymphocyte proliferation                                | 0 | 0 | -2,9177 | 1 | 0 | 0 | 0       | 0 |
| positive regulation of leukocyte proliferation                                 | 0 | 0 | -2,788  | 1 | 0 | 0 | 0       | 0 |
| regulation of lymphocyte proliferation                                         | 0 | 0 | -2,7758 | 1 | 0 | 0 | 0       | 0 |
| negative regulation of T cell receptor signaling pathway                       | 0 | 0 | -2,7728 | 1 | 0 | 0 | 0       | 0 |
| negative regulation of antigen receptor-mediated signaling pathway             | 0 | 0 | -2,7728 | 1 | 0 | 0 | 0       | 0 |
| MHC class I peptide loading complex                                            | 0 | 0 | -2,685  | 1 | 0 | 0 | 0       | 0 |
| regulation of leukocyte proliferation                                          | 0 | 0 | -2,685  | 1 | 0 | 0 | 0       | 0 |
| positive regulation of immune response                                         | 0 | 0 | -2,6328 | 1 | 0 | 0 | -2,4758 | 1 |
| immune response-activating cell surface receptor signaling pathway             | 0 | 0 | -2,5341 | 1 | 0 | 0 | -2,0443 | 1 |
| regulation of T cell differentiation                                           | 0 | 0 | -2,5341 | 1 | 0 | 0 | 0       | 0 |
| immune response-regulating cell surface receptor signaling pathway             | 0 | 0 | -2,3334 | 1 | 0 | 0 | -2,2149 | 1 |
| positive regulation of alpha-beta T cell differentiation                       | 0 | 0 | -2,3266 | 1 | 0 | 0 | 0       | 0 |
| myeloid leukocyte differentiation                                              | 0 | 0 | -2,3055 | 1 | 0 | 0 | 0       | 0 |
| positive regulation of T cell differentiation                                  | 0 | 0 | -2,2867 | 1 | 0 | 0 | 0       | 0 |
| positive regulation of interleukin-4 production                                | 0 | 0 | -2,1949 | 1 | 0 | 0 | 0       | 0 |
| positive regulation of lymphocyte differentiation                              | 0 | 0 | -2,1331 | 1 | 0 | 0 | 0       | 0 |
| negative thymic T cell selection                                               | 0 | 0 | -2,0402 | 1 | 0 | 0 | 0       | 0 |
| regulation of alpha-beta T cell differentiation                                | 0 | 0 | -1,9973 | 1 | 0 | 0 | 0       | 0 |
| regulation of myeloid leukocyte differentiation                                | 0 | 0 | -1,9297 | 1 | 0 | 0 | 0       | 0 |
| adaptive immune response                                                       | 0 | 0 | -1,8973 | 1 | 0 | 0 | -1,3477 | 1 |



|                                                                                                                                         |   |   |         |   |   |   |         |   |
|-----------------------------------------------------------------------------------------------------------------------------------------|---|---|---------|---|---|---|---------|---|
| adaptive immune response based on somatic recombination of immune receptors built from immunoglobulin superfamily domains               | 0 | 0 | -1,8973 | 1 | 0 | 0 | -1,3477 | 1 |
| antigen processing and presentation of endogenous peptide antigen via MHC class I                                                       | 0 | 0 | -1,8833 | 1 | 0 | 0 | 0       | 0 |
| CD8-positive, alpha-beta T cell differentiation                                                                                         | 0 | 0 | -1,8833 | 1 | 0 | 0 | 0       | 0 |
| negative T cell selection                                                                                                               | 0 | 0 | -1,8833 | 1 | 0 | 0 | 0       | 0 |
| negative regulation of immune system process                                                                                            | 0 | 0 | -1,88   | 1 | 0 | 0 | 0       | 0 |
| activation of immune response                                                                                                           | 0 | 0 | -1,7441 | 1 | 0 | 0 | 0       | 0 |
| interleukin-1 beta production                                                                                                           | 0 | 0 | -1,6446 | 1 | 0 | 0 | 0       | 0 |
| regulation of interleukin-1 beta production                                                                                             | 0 | 0 | -1,6446 | 1 | 0 | 0 | 0       | 0 |
| antigen processing and presentation                                                                                                     | 0 | 0 | -1,5822 | 1 | 0 | 0 | 0       | 0 |
| mast cell activation                                                                                                                    | 0 | 0 | -1,5729 | 1 | 0 | 0 | 0       | 0 |
| activated T cell proliferation                                                                                                          | 0 | 0 | -1,5651 | 1 | 0 | 0 | 0       | 0 |
| regulation of interleukin-1 production                                                                                                  | 0 | 0 | -1,5381 | 1 | 0 | 0 | 0       | 0 |
| antigen processing and presentation of peptide antigen via MHC class I                                                                  | 0 | 0 | -1,5381 | 1 | 0 | 0 | 0       | 0 |
| regulation of production of molecular mediator of immune response                                                                       | 0 | 0 | -1,4698 | 1 | 0 | 0 | 0       | 0 |
| regulation of adaptive immune response based on somatic recombination of immune receptors built from immunoglobulin superfamily domains | 0 | 0 | -1,4664 | 1 | 0 | 0 | -2,3216 | 1 |
| regulation of adaptive immune response                                                                                                  | 0 | 0 | -1,4664 | 1 | 0 | 0 | -2,3216 | 1 |
| interleukin-1 production                                                                                                                | 0 | 0 | -1,4474 | 1 | 0 | 0 | 0       | 0 |
| lymphocyte costimulation                                                                                                                | 0 | 0 | -1,381  | 1 | 0 | 0 | 0       | 0 |
| T cell costimulation                                                                                                                    | 0 | 0 | -1,381  | 1 | 0 | 0 | 0       | 0 |
| antigen processing and presentation of endogenous antigen                                                                               | 0 | 0 | -1,381  | 1 | 0 | 0 | 0       | 0 |
| antigen processing and presentation of endogenous peptide antigen                                                                       | 0 | 0 | -1,381  | 1 | 0 | 0 | 0       | 0 |
| positive regulation of alpha-beta T cell proliferation                                                                                  | 0 | 0 | -1,381  | 1 | 0 | 0 | 0       | 0 |
| T cell mediated immunity                                                                                                                | 0 | 0 | -1,3582 | 1 | 0 | 0 | -2,5471 | 1 |
| natural killer cell activation involved in immune response                                                                              | 0 | 0 | -1,3539 | 1 | 0 | 0 | 0       | 0 |
| negative regulation of interleukin-1 beta production                                                                                    | 0 | 0 | -1,3539 | 1 | 0 | 0 | 0       | 0 |

|                                                                                                                                                  |   |   |         |   |         |   |         |   |
|--------------------------------------------------------------------------------------------------------------------------------------------------|---|---|---------|---|---------|---|---------|---|
| antigen processing and presentation of exogenous peptide antigen via MHC class Ib                                                                | 0 | 0 | -1,3539 | 1 | 0       | 0 | 0       | 0 |
| MHC class I protein binding                                                                                                                      | 0 | 0 | -1,3539 | 1 | 0       | 0 | 0       | 0 |
| negative regulation of interleukin-1 production                                                                                                  | 0 | 0 | -1,3539 | 1 | 0       | 0 | 0       | 0 |
| antigen processing and presentation of exogenous protein antigen via MHC class Ib, TAP-dependent                                                 | 0 | 0 | -1,3539 | 1 | 0       | 0 | 0       | 0 |
| regulation of interleukin-6 production                                                                                                           | 0 | 0 | 0       | 0 | -1,79   | 1 | 0       | 0 |
| interleukin-6 production                                                                                                                         | 0 | 0 | 0       | 0 | -1,7149 | 1 | 0       | 0 |
| regulation of interleukin-6 biosynthetic process                                                                                                 | 0 | 0 | 0       | 0 | -1,3788 | 1 | 0       | 0 |
| antigen processing and presentation of peptide antigen                                                                                           | 0 | 0 | 0       | 0 | -1,3036 | 1 | 0       | 0 |
| regulation of T cell mediated immunity                                                                                                           | 0 | 0 | 0       | 0 | 0       | 0 | -2,4763 | 1 |
| production of molecular mediator of immune response                                                                                              | 0 | 0 | 0       | 0 | 0       | 0 | -2,2028 | 1 |
| negative regulation of adaptive immune response                                                                                                  | 0 | 0 | 0       | 0 | 0       | 0 | -2,176  | 1 |
| negative regulation of adaptive immune response based on somatic recombination of immune receptors built from immunoglobulin superfamily domains | 0 | 0 | 0       | 0 | 0       | 0 | -2,176  | 1 |
| regulation of T cell mediated cytotoxicity                                                                                                       | 0 | 0 | 0       | 0 | 0       | 0 | -1,8608 | 1 |
| T cell proliferation involved in immune response                                                                                                 | 0 | 0 | 0       | 0 | 0       | 0 | -1,8125 | 1 |
| positive regulation of T cell mediated cytotoxicity                                                                                              | 0 | 0 | 0       | 0 | 0       | 0 | -1,7157 | 1 |
| T cell mediated cytotoxicity                                                                                                                     | 0 | 0 | 0       | 0 | 0       | 0 | -1,4834 | 1 |
| negative regulation of T cell mediated immunity                                                                                                  | 0 | 0 | 0       | 0 | 0       | 0 | -1,4392 | 1 |
| negative regulation of T-helper 2 type immune response                                                                                           | 0 | 0 | 0       | 0 | 0       | 0 | -1,4049 | 1 |
| positive regulation of adaptive immune response based on somatic recombination of immune receptors built from immunoglobulin superfamily domains | 0 | 0 | 0       | 0 | 0       | 0 | -1,4049 | 1 |
| negative regulation of alpha-beta T cell proliferation                                                                                           | 0 | 0 | 0       | 0 | 0       | 0 | -1,4049 | 1 |
| positive regulation of adaptive immune response                                                                                                  | 0 | 0 | 0       | 0 | 0       | 0 | -1,4049 | 1 |
| positive regulation of antigen receptor-mediated signaling pathway                                                                               | 0 | 0 | 0       | 0 | 0       | 0 | -1,4049 | 1 |

|                                                    |   |   |   |   |   |           |   |
|----------------------------------------------------|---|---|---|---|---|-----------|---|
| negative regulation of T cell<br>activation        | 0 | 0 | 0 | 0 | 0 | 0 -1,3809 | 1 |
| positive regulation of T cell<br>mediated immunity | 0 | 0 | 0 | 0 | 0 | 0 -1,3343 | 1 |
